# Supplementary material
Source: PubMed Central journal article supplement (PMC6597220)
Supplement: jci-129-96832-s018.pdf [file jci-129-96832-s018.pdf]

Suppl. Table 1  
(1/234)

|                 | ChIP-Seq hits   |                 |                 | Unique hits with interactors |               |
|-----------------|-----------------|-----------------|-----------------|------------------------------|---------------|
|                 | unstimulated    | Ac              | LPS             | Ac                           | LPS           |
| <i>Aaas</i>     |                 |                 | <i>Aaas</i>     |                              |               |
| <i>Aadacl2</i>  | <i>Aadacl2</i>  |                 |                 |                              |               |
| <i>Aadacl3</i>  |                 |                 | <i>Aadacl3</i>  |                              |               |
| <i>Aak1</i>     | <i>Aak1</i>     | <i>Aak1</i>     | <i>Aak1</i>     |                              |               |
| <i>Aanat</i>    |                 | <i>Aanat</i>    |                 |                              |               |
| <i>Aars</i>     | <i>Aars</i>     |                 | <i>Aars</i>     |                              |               |
| <i>Aarsd1</i>   |                 |                 | <i>Aarsd1</i>   |                              |               |
| <i>Aasdh</i>    | <i>Aasdh</i>    | <i>Aasdh</i>    | <i>Aasdh</i>    |                              |               |
| <i>Aasdhppt</i> | <i>Aasdhppt</i> | <i>Aasdhppt</i> | <i>Aasdhppt</i> |                              |               |
| <i>Aatf</i>     | <i>Aatf</i>     |                 |                 |                              |               |
| <i>Abca12</i>   |                 |                 | <i>Abca12</i>   |                              |               |
| <i>Abca15</i>   |                 |                 | <i>Abca15</i>   |                              |               |
| <i>Abca16</i>   |                 |                 | <i>Abca16</i>   |                              |               |
| <i>Abca3</i>    |                 | <i>Abca3</i>    | <i>Abca3</i>    |                              |               |
| <i>Abca5</i>    |                 |                 | <i>Abca5</i>    |                              |               |
| <i>Abca7</i>    |                 | <i>Abca7</i>    | <i>Abca7</i>    |                              |               |
| <i>Abca8b</i>   |                 | <i>Abca8b</i>   |                 |                              |               |
| <i>Abcb1a</i>   |                 | <i>Abcb1a</i>   |                 |                              |               |
| <i>Abcb1b</i>   |                 |                 | <i>Abcb1b</i>   |                              | <i>Abcb1b</i> |
| <i>Abcb8</i>    | <i>Abcb8</i>    |                 |                 |                              |               |
| <i>Abcc1</i>    |                 | <i>Abcc1</i>    |                 | <i>Abcc1</i>                 |               |
| <i>Abcc12</i>   |                 | <i>Abcc12</i>   |                 |                              |               |
| <i>Abcc2</i>    |                 | <i>Abcc2</i>    | <i>Abcc2</i>    |                              |               |
| <i>Abcc3</i>    |                 |                 | <i>Abcc3</i>    |                              |               |
| <i>Abcc8</i>    |                 |                 | <i>Abcc8</i>    |                              |               |
| <i>Abcc9</i>    |                 |                 | <i>Abcc9</i>    |                              | <i>Abcc9</i>  |
| <i>Abcd2</i>    |                 | <i>Abcd2</i>    |                 | <i>Abcd2</i>                 |               |
| <i>Abcd3</i>    |                 | <i>Abcd3</i>    |                 | <i>Abcd3</i>                 |               |
| <i>Abcd4</i>    |                 | <i>Abcd4</i>    |                 | <i>Abcd4</i>                 |               |
| <i>Abce1</i>    |                 | <i>Abce1</i>    |                 | <i>Abce1</i>                 |               |
| <i>Abcf2</i>    |                 |                 | <i>Abcf2</i>    |                              |               |
| <i>Abcg1</i>    | <i>Abcg1</i>    |                 |                 |                              |               |
| <i>Abcg3</i>    |                 |                 | <i>Abcg3</i>    |                              |               |
| <i>Abcg5</i>    |                 |                 | <i>Abcg5</i>    |                              | <i>Abcg5</i>  |
| <i>Abhd1</i>    |                 | <i>Abhd1</i>    |                 |                              |               |
| <i>Abhd14a</i>  |                 | <i>Abhd14a</i>  | <i>Abhd14a</i>  |                              |               |
| <i>Abhd14b</i>  |                 | <i>Abhd14b</i>  | <i>Abhd14b</i>  |                              |               |
| <i>Abhd16a</i>  |                 | <i>Abhd16a</i>  | <i>Abhd16a</i>  |                              |               |
| <i>Abhd16b</i>  | <i>Abhd16b</i>  | <i>Abhd16b</i>  | <i>Abhd16b</i>  |                              |               |
| <i>Abhd17b</i>  |                 | <i>Abhd17b</i>  |                 |                              |               |
| <i>Abhd17c</i>  | <i>Abhd17c</i>  |                 |                 |                              |               |
| <i>Abhd4</i>    |                 | <i>Abhd4</i>    | <i>Abhd4</i>    |                              |               |
| <i>Abhd5</i>    | <i>Abhd5</i>    |                 | <i>Abhd5</i>    |                              |               |
| <i>Abhd8</i>    |                 | <i>Abhd8</i>    |                 |                              |               |
| <i>Abi1</i>     |                 | <i>Abi1</i>     | <i>Abi1</i>     |                              |               |
| <i>Abi3</i>     |                 | <i>Abi3</i>     | <i>Abi3</i>     |                              |               |
| <i>Abl1</i>     |                 | <i>Abl1</i>     | <i>Abl1</i>     |                              |               |
| <i>Ablim1</i>   |                 |                 | <i>Ablim1</i>   |                              |               |
| <i>Ablim2</i>   | <i>Ablim2</i>   |                 |                 |                              |               |

Suppl. Table 1  
(2/234)

|                | CHIP-Seq hits |        |         | Unique hits with interactors |        |
|----------------|---------------|--------|---------|------------------------------|--------|
|                | unstimulated  | Ac     | LPS     | Ac                           | LPS    |
| <i>Abo</i>     | Abo           | Abo    |         |                              |        |
| <i>Abr</i>     |               | Abr    |         | Abr                          |        |
| <i>Abra</i>    | Abra          |        | Abra    |                              |        |
| <i>Abtb2</i>   |               |        | Abtb2   |                              |        |
| <i>Acaa1a</i>  |               |        | Acaa1a  |                              |        |
| <i>Acaca</i>   |               | Acaca  |         |                              |        |
| <i>Acacb</i>   |               | Acacb  |         |                              |        |
| <i>Acad10</i>  |               | Acad10 |         |                              |        |
| <i>Acad11</i>  |               | Acad11 |         |                              |        |
| <i>Acad12</i>  |               | Acad12 | Acad12  |                              |        |
| <i>Acadm</i>   | Acadm         | Acadm  | Acadm   |                              |        |
| <i>Acads</i>   |               | Acads  |         |                              |        |
| <i>Acap1</i>   |               |        | Acap1   |                              |        |
| <i>Acap3</i>   | Acap3         |        |         |                              |        |
| <i>Acat1</i>   |               | Acat1  | Acat1   |                              |        |
| <i>Acat2</i>   | Acat2         | Acat2  | Acat2   |                              |        |
| <i>Acat3</i>   |               | Acat3  |         |                              |        |
| <i>Acbd3</i>   |               | Acbd3  |         |                              |        |
| <i>Acbd4</i>   |               | Acbd4  | Acbd4   |                              |        |
| <i>Acbd5</i>   | Acbd5         | Acbd5  | Acbd5   |                              |        |
| <i>Acd</i>     | Acd           |        | Acd     |                              |        |
| <i>Ace</i>     |               | Ace    | Ace     |                              |        |
| <i>Ace2</i>    |               | Ace2   |         |                              |        |
| <i>Acin1</i>   | Acin1         | Acin1  | Acin1   |                              |        |
| <i>Acmsd</i>   | Acmsd         |        |         |                              |        |
| <i>Acnat1</i>  |               | Acnat1 |         | Acnat1                       |        |
| <i>Acnat2</i>  |               |        | Acnat2  |                              |        |
| <i>Aco1</i>    |               | Aco1   | Aco1    |                              |        |
| <i>Acot1</i>   |               | Acot1  |         |                              |        |
| <i>Acot10</i>  |               |        | Acot10  |                              |        |
| <i>Acot11</i>  |               |        | Acot11  |                              | Acot11 |
| <i>Acot12</i>  | Acot12        |        | Acot12  |                              |        |
| <i>Acot13</i>  |               | Acot13 |         |                              |        |
| <i>Acot4</i>   | Acot4         |        | Acot4   |                              |        |
| <i>Acot6</i>   |               |        | Acot6   |                              |        |
| <i>Acot7</i>   |               | Acot7  |         |                              |        |
| <i>Acot8</i>   |               |        | Acot8   |                              |        |
| <i>Acox1</i>   | Acox1         |        | Acox1   |                              |        |
| <i>Acox1</i>   |               | Acox1  | Acox1   |                              |        |
| <i>Acp1</i>    |               |        | Acp1    |                              |        |
| <i>Acp6</i>    | Acp6          |        | Acp6    |                              |        |
| <i>Acpp</i>    |               |        | Acpp    |                              |        |
| <i>Acrbp</i>   | Acrbp         |        |         |                              |        |
| <i>Acsbg2</i>  |               | Acsbg2 |         |                              |        |
| <i>Acsf2</i>   |               |        | Acsf2   |                              |        |
| <i>Acsl1</i>   | Acsl1         |        | Acsl1   |                              |        |
| <i>Acsl3</i>   |               | Acsl3  |         |                              |        |
| <i>Acsl6</i>   |               | Acsl6  |         |                              |        |
| <i>Acss2os</i> |               |        | Acss2os |                              |        |

Suppl. Table 1  
(3/234)

|                 | ChIP-Seq hits   |                 |                 | Unique hits with interactors |               |
|-----------------|-----------------|-----------------|-----------------|------------------------------|---------------|
|                 | unstimulated    | Ac              | LPS             | Ac                           | LPS           |
| <i>Acss3</i>    |                 |                 | <i>Acss3</i>    |                              |               |
| <i>Actb</i>     |                 | <i>Actb</i>     | <i>Actb</i>     |                              |               |
| <i>Actc1</i>    | <i>Actc1</i>    | <i>Actc1</i>    | <i>Actc1</i>    |                              |               |
| <i>Actl10</i>   | <i>Actl10</i>   |                 | <i>Actl10</i>   |                              |               |
| <i>Actl11</i>   |                 | <i>Actl11</i>   |                 |                              |               |
| <i>Actl9</i>    |                 | <i>Actl9</i>    |                 |                              |               |
| <i>Actr3b</i>   | <i>Actr3b</i>   |                 |                 |                              |               |
| <i>Actr6</i>    |                 |                 | <i>Actr6</i>    |                              |               |
| <i>Actr8</i>    | <i>Actr8</i>    |                 | <i>Actr8</i>    |                              |               |
| <i>Acvr1</i>    |                 | <i>Acvr1</i>    |                 |                              |               |
| <i>Acvr1b</i>   |                 |                 | <i>Acvr1b</i>   |                              | <i>Acvr1b</i> |
| <i>Acvr2a</i>   |                 | <i>Acvr2a</i>   |                 |                              |               |
| <i>Acvrl1</i>   |                 | <i>Acvrl1</i>   |                 |                              |               |
| <i>Acy1</i>     |                 |                 | <i>Acy1</i>     |                              |               |
| <i>Acy3</i>     |                 | <i>Acy3</i>     |                 |                              |               |
| <i>Acyp1</i>    | <i>Acyp1</i>    | <i>Acyp1</i>    | <i>Acyp1</i>    |                              |               |
| <i>Ada</i>      |                 |                 | <i>Ada</i>      |                              |               |
| <i>Adad1</i>    | <i>Adad1</i>    |                 |                 |                              |               |
| <i>Adad2</i>    |                 |                 | <i>Adad2</i>    |                              |               |
| <i>Adal</i>     |                 | <i>Adal</i>     |                 |                              |               |
| <i>Adam17</i>   |                 | <i>Adam17</i>   | <i>Adam17</i>   |                              |               |
| <i>Adam18</i>   |                 |                 | <i>Adam18</i>   |                              |               |
| <i>Adam19</i>   | <i>Adam19</i>   | <i>Adam19</i>   | <i>Adam19</i>   |                              |               |
| <i>Adam1a</i>   |                 | <i>Adam1a</i>   |                 |                              |               |
| <i>Adam1b</i>   |                 |                 | <i>Adam1b</i>   |                              |               |
| <i>Adam20</i>   |                 |                 | <i>Adam20</i>   |                              |               |
| <i>Adam26a</i>  |                 |                 | <i>Adam26a</i>  |                              |               |
| <i>Adam26b</i>  |                 |                 | <i>Adam26b</i>  |                              |               |
| <i>Adam32</i>   |                 | <i>Adam32</i>   | <i>Adam32</i>   |                              |               |
| <i>Adam5</i>    |                 | <i>Adam5</i>    | <i>Adam5</i>    |                              |               |
| <i>Adam7</i>    |                 |                 | <i>Adam7</i>    |                              |               |
| <i>Adamdec1</i> | <i>Adamdec1</i> |                 |                 |                              |               |
| <i>Adamts1</i>  | <i>Adamts1</i>  | <i>Adamts1</i>  | <i>Adamts1</i>  |                              |               |
| <i>Adamts10</i> |                 | <i>Adamts10</i> |                 |                              |               |
| <i>Adamts12</i> |                 | <i>Adamts12</i> |                 |                              |               |
| <i>Adamts14</i> |                 | <i>Adamts14</i> | <i>Adamts14</i> |                              |               |
| <i>Adamts15</i> |                 | <i>Adamts15</i> |                 |                              |               |
| <i>Adamts18</i> |                 | <i>Adamts18</i> |                 |                              |               |
| <i>Adamts19</i> |                 |                 | <i>Adamts19</i> |                              |               |
| <i>Adamts20</i> |                 | <i>Adamts20</i> |                 |                              |               |
| <i>Adamts4</i>  | <i>Adamts4</i>  | <i>Adamts4</i>  | <i>Adamts4</i>  |                              |               |
| <i>Adamts5</i>  |                 | <i>Adamts5</i>  |                 |                              |               |
| <i>Adamts6</i>  | <i>Adamts6</i>  | <i>Adamts6</i>  | <i>Adamts6</i>  |                              |               |
| <i>Adamts7</i>  |                 |                 | <i>Adamts7</i>  |                              |               |
| <i>Adamts9</i>  |                 | <i>Adamts9</i>  | <i>Adamts9</i>  |                              |               |
| <i>Adamtsl1</i> |                 | <i>Adamtsl1</i> |                 |                              |               |
| <i>Adamtsl2</i> |                 |                 | <i>Adamtsl2</i> |                              |               |
| <i>Adamtsl5</i> |                 | <i>Adamtsl5</i> |                 |                              |               |
| <i>Adarb1</i>   | <i>Adarb1</i>   | <i>Adarb1</i>   | <i>Adarb1</i>   |                              |               |

Suppl. Table 1  
(4/234)

|                | CHIP-Seq hits  |                |                | Unique hits with interactors |              |
|----------------|----------------|----------------|----------------|------------------------------|--------------|
|                | unstimulated   | Ac             | LPS            | Ac                           | LPS          |
| <i>Adarb2</i>  | <i>Adarb2</i>  | <i>Adarb2</i>  |                |                              |              |
| <i>Adat1</i>   |                |                | <i>Adat1</i>   |                              |              |
| <i>Adat2</i>   | <i>Adat2</i>   |                | <i>Adat2</i>   |                              |              |
| <i>Adck1</i>   | <i>Adck1</i>   |                |                |                              |              |
| <i>Adck3</i>   | <i>Adck3</i>   |                |                |                              |              |
| <i>Adck5</i>   |                | <i>Adck5</i>   |                |                              |              |
| <i>Adcy2</i>   |                |                | <i>Adcy2</i>   |                              |              |
| <i>Adcy6</i>   |                | <i>Adcy6</i>   |                | <i>Adcy6</i>                 |              |
| <i>Adcy7</i>   |                | <i>Adcy7</i>   |                |                              |              |
| <i>Adcy9</i>   | <i>Adcy9</i>   | <i>Adcy9</i>   | <i>Adcy9</i>   |                              |              |
| <i>Adcyap1</i> |                | <i>Adcyap1</i> |                |                              |              |
| <i>Add1</i>    |                |                | <i>Add1</i>    |                              | <i>Add1</i>  |
| <i>Add2</i>    |                | <i>Add2</i>    |                |                              |              |
| <i>Add3</i>    | <i>Add3</i>    |                |                |                              |              |
| <i>Adgb</i>    |                | <i>Adgb</i>    |                |                              |              |
| <i>Adgra3</i>  |                | <i>Adgra3</i>  |                |                              |              |
| <i>Adgrb2</i>  |                |                | <i>Adgrb2</i>  |                              |              |
| <i>Adgrd1</i>  |                | <i>Adgrd1</i>  |                |                              |              |
| <i>Adgre4</i>  | <i>Adgre4</i>  |                |                |                              |              |
| <i>Adgrf1</i>  |                | <i>Adgrf1</i>  | <i>Adgrf1</i>  |                              |              |
| <i>Adgrf2</i>  | <i>Adgrf2</i>  |                |                |                              |              |
| <i>Adgrf3</i>  | <i>Adgrf3</i>  |                | <i>Adgrf3</i>  |                              |              |
| <i>Adgrg6</i>  |                | <i>Adgrg6</i>  | <i>Adgrg6</i>  |                              |              |
| <i>Adgrl2</i>  | <i>Adgrl2</i>  |                |                |                              |              |
| <i>Adgrl3</i>  |                | <i>Adgrl3</i>  |                |                              |              |
| <i>Adgrl4</i>  |                |                | <i>Adgrl4</i>  |                              |              |
| <i>Adgrv1</i>  |                | <i>Adgrv1</i>  |                |                              |              |
| <i>Adh1</i>    |                | <i>Adh1</i>    |                |                              |              |
| <i>Adh5</i>    |                | <i>Adh5</i>    | <i>Adh5</i>    |                              |              |
| <i>Adhfe1</i>  |                |                | <i>Adhfe1</i>  |                              |              |
| <i>Adig</i>    |                | <i>Adig</i>    |                |                              |              |
| <i>Adipoq</i>  |                | <i>Adipoq</i>  | <i>Adipoq</i>  |                              |              |
| <i>Adipor2</i> | <i>Adipor2</i> | <i>Adipor2</i> | <i>Adipor2</i> |                              |              |
| <i>Adk</i>     | <i>Adk</i>     | <i>Adk</i>     | <i>Adk</i>     |                              |              |
| <i>Adm</i>     |                |                | <i>Adm</i>     |                              | <i>Adm</i>   |
| <i>Adnp</i>    |                | <i>Adnp</i>    | <i>Adnp</i>    |                              |              |
| <i>Adnp2</i>   | <i>Adnp2</i>   | <i>Adnp2</i>   | <i>Adnp2</i>   |                              |              |
| <i>Adora1</i>  |                | <i>Adora1</i>  | <i>Adora1</i>  |                              |              |
| <i>Adora2b</i> |                | <i>Adora2b</i> | <i>Adora2b</i> |                              |              |
| <i>Adpgk</i>   |                | <i>Adpgk</i>   | <i>Adpgk</i>   |                              |              |
| <i>Adprm</i>   |                |                | <i>Adprm</i>   |                              | <i>Adprm</i> |
| <i>Adra1a</i>  |                |                | <i>Adra1a</i>  |                              |              |
| <i>Adra1b</i>  | <i>Adra1b</i>  | <i>Adra1b</i>  | <i>Adra1b</i>  |                              |              |
| <i>Adra1d</i>  |                | <i>Adra1d</i>  |                |                              |              |
| <i>Adrb2</i>   |                | <i>Adrb2</i>   |                |                              |              |
| <i>Adrbk1</i>  | <i>Adrbk1</i>  |                | <i>Adrbk1</i>  |                              |              |
| <i>Adrbk2</i>  | <i>Adrbk2</i>  |                |                |                              |              |
| <i>Adsl</i>    |                |                | <i>Adsl</i>    |                              | <i>Adsl</i>  |
| <i>Adtrp</i>   |                |                | <i>Adtrp</i>   |                              | <i>Adtrp</i> |

Suppl. Table 1  
(5/234)

|                 | ChIP-Seq hits   |                 |                 | Unique hits with interactors |               |
|-----------------|-----------------|-----------------|-----------------|------------------------------|---------------|
|                 | unstimulated    | Ac              | LPS             | Ac                           | LPS           |
| <i>Aebp2</i>    |                 | <i>Aebp2</i>    | <i>Aebp2</i>    |                              |               |
| <i>Aen</i>      |                 | <i>Aen</i>      |                 |                              |               |
| <i>Aes</i>      |                 |                 | <i>Aes</i>      |                              | <i>Aes</i>    |
| <i>AF067061</i> |                 |                 | <i>AF067061</i> |                              |               |
| <i>AF357355</i> | <i>AF357355</i> |                 |                 |                              |               |
| <i>AF357425</i> |                 | <i>AF357425</i> |                 |                              |               |
| <i>AF366264</i> |                 | <i>AF366264</i> |                 |                              |               |
| <i>AF529169</i> |                 | <i>AF529169</i> |                 |                              |               |
| <i>Afap1</i>    |                 |                 | <i>Afap1</i>    |                              | <i>Afap1</i>  |
| <i>Afap1l1</i>  | <i>Afap1l1</i>  | <i>Afap1l1</i>  | <i>Afap1l1</i>  |                              |               |
| <i>Afap1l2</i>  | <i>Afap1l2</i>  |                 |                 |                              |               |
| <i>Aff4</i>     | <i>Aff4</i>     |                 |                 |                              |               |
| <i>Afg3l1</i>   |                 |                 | <i>Afg3l1</i>   |                              | <i>Afg3l1</i> |
| <i>Afg3l2</i>   |                 |                 | <i>Afg3l2</i>   |                              |               |
| <i>Afm</i>      |                 |                 | <i>Afm</i>      |                              |               |
| <i>Afp</i>      |                 | <i>Afp</i>      |                 |                              |               |
| <i>Aftph</i>    | <i>Aftph</i>    | <i>Aftph</i>    | <i>Aftph</i>    |                              |               |
| <i>Aga</i>      | <i>Aga</i>      |                 |                 |                              |               |
| <i>Agap2</i>    |                 |                 | <i>Agap2</i>    |                              |               |
| <i>Agbl1</i>    |                 | <i>Agbl1</i>    |                 |                              |               |
| <i>Agbl2</i>    |                 | <i>Agbl2</i>    |                 |                              |               |
| <i>Agbl3</i>    |                 |                 | <i>Agbl3</i>    |                              |               |
| <i>Agfg1</i>    |                 |                 | <i>Agfg1</i>    |                              | <i>Agfg1</i>  |
| <i>Ago1</i>     |                 |                 | <i>Ago1</i>     |                              | <i>Ago1</i>   |
| <i>Ago4</i>     |                 |                 | <i>Ago4</i>     |                              | <i>Ago4</i>   |
| <i>Agpat2</i>   | <i>Agpat2</i>   |                 | <i>Agpat2</i>   |                              |               |
| <i>Agpat5</i>   |                 | <i>Agpat5</i>   |                 |                              |               |
| <i>Agpat6</i>   |                 | <i>Agpat6</i>   |                 | <i>Agpat6</i>                |               |
| <i>Agpat9</i>   |                 |                 | <i>Agpat9</i>   |                              |               |
| <i>Agps</i>     |                 |                 | <i>Agps</i>     |                              |               |
| <i>Agr2</i>     |                 |                 | <i>Agr2</i>     |                              |               |
| <i>Agr3</i>     |                 |                 | <i>Agr3</i>     |                              |               |
| <i>Agrn</i>     |                 |                 | <i>Agrn</i>     |                              |               |
| <i>Agrp</i>     |                 |                 | <i>Agrp</i>     |                              |               |
| <i>Agtpbp1</i>  | <i>Agtpbp1</i>  | <i>Agtpbp1</i>  |                 |                              |               |
| <i>Agtr1b</i>   |                 |                 | <i>Agtr1b</i>   |                              |               |
| <i>Agtrap</i>   | <i>Agtrap</i>   |                 | <i>Agtrap</i>   |                              |               |
| <i>Agxt</i>     | <i>Agxt</i>     |                 |                 |                              |               |
| <i>Ahctf1</i>   |                 |                 | <i>Ahctf1</i>   |                              |               |
| <i>Ahcy</i>     |                 |                 | <i>Ahcy</i>     |                              |               |
| <i>Ahcyl1</i>   |                 | <i>Ahcyl1</i>   |                 | <i>Ahcyl1</i>                |               |
| <i>Ahcyl2</i>   |                 |                 | <i>Ahcyl2</i>   |                              |               |
| <i>Ahnak</i>    |                 |                 | <i>Ahnak</i>    |                              | <i>Ahnak</i>  |
| <i>Ahsa1</i>    | <i>Ahsa1</i>    |                 | <i>Ahsa1</i>    |                              |               |
| <i>Ahsa2</i>    | <i>Ahsa2</i>    | <i>Ahsa2</i>    | <i>Ahsa2</i>    |                              |               |
| <i>Ahsg</i>     |                 | <i>Ahsg</i>     |                 |                              |               |
| <i>AI118078</i> |                 |                 | <i>AI118078</i> |                              |               |
| <i>AI197445</i> |                 | <i>AI197445</i> |                 |                              |               |
| <i>AI314180</i> |                 |                 | <i>AI314180</i> |                              |               |

Suppl. Table 1  
(6/234)

|                 | ChIP-Seq hits   |                 | Unique hits with interactors |    |                 |
|-----------------|-----------------|-----------------|------------------------------|----|-----------------|
|                 | unstimulated    | Ac              | LPS                          | Ac | LPS             |
| <i>AI317395</i> |                 | <i>AI317395</i> |                              |    |                 |
| <i>AI413582</i> |                 |                 | <i>AI413582</i>              |    |                 |
| <i>AI427809</i> | <i>AI427809</i> |                 | <i>AI427809</i>              |    |                 |
| <i>AI429214</i> |                 |                 | <i>AI429214</i>              |    | <i>AI429214</i> |
| <i>AI450353</i> | <i>AI450353</i> |                 | <i>AI450353</i>              |    |                 |
| <i>AI463170</i> | <i>AI463170</i> |                 |                              |    |                 |
| <i>AI464131</i> |                 | <i>AI464131</i> |                              |    |                 |
| <i>AI504432</i> |                 | <i>AI504432</i> |                              |    |                 |
| <i>AI606473</i> |                 | <i>AI606473</i> |                              |    |                 |
| <i>AI646519</i> |                 | <i>AI646519</i> |                              |    |                 |
| <i>AI661453</i> |                 | <i>AI661453</i> |                              |    |                 |
| <i>AI662270</i> |                 | <i>AI662270</i> | <i>AI662270</i>              |    |                 |
| <i>AI839979</i> | <i>AI839979</i> |                 | <i>AI839979</i>              |    |                 |
| <i>AI846148</i> |                 | <i>AI846148</i> | <i>AI846148</i>              |    |                 |
| <i>AI847159</i> |                 | <i>AI847159</i> |                              |    |                 |
| <i>AI854517</i> |                 | <i>AI854517</i> | <i>AI854517</i>              |    |                 |
| <i>AI854703</i> | <i>AI854703</i> |                 |                              |    |                 |
| <i>Aicda</i>    |                 |                 | <i>Aicda</i>                 |    | <i>Aicda</i>    |
| <i>Aida</i>     |                 |                 | <i>Aida</i>                  |    | <i>Aida</i>     |
| <i>Aif1</i>     |                 | <i>Aif1</i>     | <i>Aif1</i>                  |    |                 |
| <i>Aifm3</i>    |                 | <i>Aifm3</i>    |                              |    |                 |
| <i>Aim1</i>     |                 | <i>Aim1</i>     |                              |    |                 |
| <i>Aimp1</i>    |                 |                 | <i>Aimp1</i>                 |    |                 |
| <i>Aimp2</i>    |                 |                 | <i>Aimp2</i>                 |    |                 |
| <i>Aipl1</i>    |                 |                 | <i>Aipl1</i>                 |    | <i>Aipl1</i>    |
| <i>Airn</i>     |                 | <i>Airn</i>     | <i>Airn</i>                  |    |                 |
| <i>AK010878</i> | <i>AK010878</i> |                 |                              |    |                 |
| <i>Ak2</i>      |                 |                 | <i>Ak2</i>                   |    |                 |
| <i>Ak4</i>      | <i>Ak4</i>      | <i>Ak4</i>      | <i>Ak4</i>                   |    |                 |
| <i>Ak5</i>      | <i>Ak5</i>      |                 |                              |    |                 |
| <i>Ak6</i>      |                 |                 | <i>Ak6</i>                   |    |                 |
| <i>Akap1</i>    |                 | <i>Akap1</i>    | <i>Akap1</i>                 |    |                 |
| <i>Akap10</i>   | <i>Akap10</i>   | <i>Akap10</i>   |                              |    |                 |
| <i>Akap11</i>   |                 |                 | <i>Akap11</i>                |    | <i>Akap11</i>   |
| <i>Akap13</i>   |                 | <i>Akap13</i>   | <i>Akap13</i>                |    |                 |
| <i>Akap14</i>   |                 |                 | <i>Akap14</i>                |    |                 |
| <i>Akap3</i>    |                 |                 | <i>Akap3</i>                 |    |                 |
| <i>Akap4</i>    | <i>Akap4</i>    |                 |                              |    |                 |
| <i>Akap8</i>    |                 |                 | <i>Akap8</i>                 |    | <i>Akap8</i>    |
| <i>Akip1</i>    |                 | <i>Akip1</i>    | <i>Akip1</i>                 |    |                 |
| <i>Akirin2</i>  |                 | <i>Akirin2</i>  | <i>Akirin2</i>               |    |                 |
| <i>Akr1b8</i>   | <i>Akr1b8</i>   | <i>Akr1b8</i>   |                              |    |                 |
| <i>Akr1c12</i>  |                 | <i>Akr1c12</i>  |                              |    |                 |
| <i>Akr1c13</i>  |                 | <i>Akr1c13</i>  |                              |    |                 |
| <i>Akr1c14</i>  |                 | <i>Akr1c14</i>  | <i>Akr1c14</i>               |    |                 |
| <i>Akr1c18</i>  |                 |                 | <i>Akr1c18</i>               |    |                 |
| <i>Akr1c19</i>  |                 |                 | <i>Akr1c19</i>               |    |                 |
| <i>Akr1c21</i>  |                 | <i>Akr1c21</i>  | <i>Akr1c21</i>               |    |                 |
| <i>Akr1cl</i>   |                 | <i>Akr1cl</i>   |                              |    |                 |

Suppl. Table 1  
(7/234)

|                 | CHIP-Seq hits   |                 |                 | Unique hits with interactors |                |
|-----------------|-----------------|-----------------|-----------------|------------------------------|----------------|
|                 | unstimulated    | Ac              | LPS             | Ac                           | LPS            |
| <i>Akr1d1</i>   |                 |                 | <i>Akr1d1</i>   |                              | <i>Akr1d1</i>  |
| <i>Akr7a5</i>   | <i>Akr7a5</i>   |                 |                 |                              |                |
| <i>Akt3</i>     |                 | <i>Akt3</i>     |                 |                              |                |
| <i>Alad</i>     |                 |                 | <i>Alad</i>     |                              |                |
| <i>Alas1</i>    |                 | <i>Alas1</i>    |                 |                              |                |
| <i>Alcam</i>    |                 |                 | <i>Alcam</i>    |                              |                |
| <i>Aldh16a1</i> |                 | <i>Aldh16a1</i> |                 |                              |                |
| <i>Aldh18a1</i> |                 | <i>Aldh18a1</i> | <i>Aldh18a1</i> |                              |                |
| <i>Aldh1a1</i>  |                 |                 | <i>Aldh1a1</i>  |                              | <i>Aldh1a1</i> |
| <i>Aldh1a2</i>  | <i>Aldh1a2</i>  |                 |                 |                              |                |
| <i>Aldh1l2</i>  |                 |                 | <i>Aldh1l2</i>  |                              | <i>Aldh1l2</i> |
| <i>Aldh2</i>    |                 | <i>Aldh2</i>    |                 |                              |                |
| <i>Aldh3b3</i>  |                 |                 | <i>Aldh3b3</i>  |                              |                |
| <i>Aldh4a1</i>  |                 | <i>Aldh4a1</i>  |                 |                              |                |
| <i>Aldh5a1</i>  |                 | <i>Aldh5a1</i>  | <i>Aldh5a1</i>  |                              |                |
| <i>Aldh7a1</i>  |                 |                 | <i>Aldh7a1</i>  |                              |                |
| <i>Aldh8a1</i>  |                 | <i>Aldh8a1</i>  | <i>Aldh8a1</i>  |                              |                |
| <i>Aldoa</i>    |                 | <i>Aldoa</i>    | <i>Aldoa</i>    |                              |                |
| <i>Alg1</i>     |                 | <i>Alg1</i>     |                 |                              |                |
| <i>Alg10b</i>   |                 | <i>Alg10b</i>   |                 |                              |                |
| <i>Alg11</i>    | <i>Alg11</i>    | <i>Alg11</i>    | <i>Alg11</i>    |                              |                |
| <i>Alg6</i>     |                 |                 | <i>Alg6</i>     |                              | <i>Alg6</i>    |
| <i>Alg8</i>     | <i>Alg8</i>     | <i>Alg8</i>     | <i>Alg8</i>     |                              |                |
| <i>Alg9</i>     |                 |                 | <i>Alg9</i>     |                              |                |
| <i>Alkbh2</i>   |                 |                 | <i>Alkbh2</i>   |                              |                |
| <i>Alkbh3</i>   | <i>Alkbh3</i>   | <i>Alkbh3</i>   | <i>Alkbh3</i>   |                              |                |
| <i>Alms1</i>    |                 | <i>Alms1</i>    |                 |                              |                |
| <i>Alox12e</i>  |                 | <i>Alox12e</i>  |                 |                              |                |
| <i>Alox5ap</i>  |                 |                 | <i>Alox5ap</i>  |                              |                |
| <i>Alpk1</i>    |                 |                 | <i>Alpk1</i>    |                              |                |
| <i>Alpk3</i>    |                 |                 | <i>Alpk3</i>    |                              |                |
| <i>Als2cr11</i> | <i>Als2cr11</i> |                 |                 |                              |                |
| <i>Alx4</i>     |                 | <i>Alx4</i>     |                 |                              |                |
| <i>Amacr</i>    |                 |                 | <i>Amacr</i>    |                              |                |
| <i>Ambra1</i>   |                 | <i>Ambra1</i>   |                 |                              |                |
| <i>Amd1</i>     |                 |                 | <i>Amd1</i>     |                              |                |
| <i>Amd2</i>     |                 |                 | <i>Amd2</i>     |                              |                |
| <i>Amelx</i>    |                 | <i>Amelx</i>    |                 | <i>Amelx</i>                 |                |
| <i>Amer1</i>    |                 | <i>Amer1</i>    |                 | <i>Amer1</i>                 |                |
| <i>Amer2</i>    |                 |                 | <i>Amer2</i>    |                              | <i>Amer2</i>   |
| <i>Amh</i>      |                 | <i>Amh</i>      |                 | <i>Amh</i>                   |                |
| <i>Amhr2</i>    |                 |                 | <i>Amhr2</i>    |                              |                |
| <i>Amica1</i>   |                 | <i>Amica1</i>   |                 |                              |                |
| <i>Amigo1</i>   |                 | <i>Amigo1</i>   |                 |                              |                |
| <i>Amigo2</i>   | <i>Amigo2</i>   |                 |                 |                              |                |
| <i>Amigo3</i>   | <i>Amigo3</i>   |                 |                 |                              |                |
| <i>Ammecr1</i>  | <i>Ammecr1</i>  |                 | <i>Ammecr1</i>  |                              |                |
| <i>Ammecr1l</i> | <i>Ammecr1l</i> |                 | <i>Ammecr1l</i> |                              |                |
| <i>Amn</i>      |                 | <i>Amn</i>      |                 |                              |                |

Suppl. Table 1  
(8/234)

|                 | CHIP-Seq hits |         |          | Unique hits with interactors |        |
|-----------------|---------------|---------|----------|------------------------------|--------|
|                 | unstimulated  | Ac      | LPS      | Ac                           | LPS    |
| <i>Amn1</i>     | Amn1          |         |          |                              |        |
| <i>Amotl1</i>   |               | Amotl1  |          |                              |        |
| <i>Amotl2</i>   |               |         | Amotl2   |                              |        |
| <i>Ampd1</i>    |               | Ampd1   | Ampd1    |                              |        |
| <i>Amtn</i>     | Amtn          |         |          |                              |        |
| <i>Amy2a2</i>   | Amy2a2        |         | Amy2a2   |                              |        |
| <i>Amy2a3</i>   | Amy2a3        |         | Amy2a3   |                              |        |
| <i>Amy2a4</i>   | Amy2a4        |         | Amy2a4   |                              |        |
| <i>Amy2a5</i>   | Amy2a5        |         | Amy2a5   |                              |        |
| <i>Amy2b</i>    |               |         | Amy2b    |                              |        |
| <i>Anapc1</i>   | Anapc1        |         | Anapc1   |                              |        |
| <i>Anapc10</i>  |               | Anapc10 |          |                              |        |
| <i>Anapc13</i>  |               | Anapc13 |          |                              |        |
| <i>Anapc2</i>   |               | Anapc2  |          |                              |        |
| <i>Anapc4</i>   | Anapc4        |         |          |                              |        |
| <i>Anapc5</i>   |               |         | Anapc5   |                              |        |
| <i>Ang</i>      |               |         | Ang      |                              |        |
| <i>Ang2</i>     |               | Ang2    |          |                              |        |
| <i>Ang3</i>     |               |         | Ang3     |                              |        |
| <i>Ang5</i>     |               |         | Ang5     |                              |        |
| <i>Angel1</i>   |               | Angel1  |          | Angel1                       |        |
| <i>Angel2</i>   |               |         | Angel2   |                              | Angel2 |
| <i>Angpt4</i>   |               | Angpt4  |          |                              |        |
| <i>Angptl2</i>  | Angptl2       |         |          |                              |        |
| <i>Angptl3</i>  | Angptl3       |         | Angptl3  |                              |        |
| <i>Angptl6</i>  | Angptl6       |         |          |                              |        |
| <i>Ank</i>      |               |         | Ank      |                              |        |
| <i>Ank2</i>     |               | Ank2    |          | Ank2                         |        |
| <i>Ankar</i>    |               | Ankar   |          |                              |        |
| <i>Ankef1</i>   |               | Ankef1  |          |                              |        |
| <i>Ankhd1</i>   | Ankhd1        | Ankhd1  | Ankhd1   |                              |        |
| <i>Ankib1</i>   | Ankib1        |         | Ankib1   |                              |        |
| <i>Ankk1</i>    |               | Ankk1   |          |                              |        |
| <i>Ankle1</i>   |               |         | Ankle1   |                              |        |
| <i>Ankle2</i>   |               |         | Ankle2   |                              | Ankle2 |
| <i>Ankmy2</i>   |               | Ankmy2  | Ankmy2   |                              |        |
| <i>Ankrd10</i>  | Ankrd10       |         | Ankrd10  |                              |        |
| <i>Ankrd11</i>  | Ankrd11       | Ankrd11 |          |                              |        |
| <i>Ankrd12</i>  | Ankrd12       |         |          |                              |        |
| <i>Ankrd13a</i> |               |         | Ankrd13a |                              |        |
| <i>Ankrd17</i>  |               | Ankrd17 | Ankrd17  |                              |        |
| <i>Ankrd22</i>  |               | Ankrd22 |          |                              |        |
| <i>Ankrd24</i>  |               | Ankrd24 |          |                              |        |
| <i>Ankrd27</i>  |               | Ankrd27 | Ankrd27  |                              |        |
| <i>Ankrd28</i>  | Ankrd28       | Ankrd28 | Ankrd28  |                              |        |
| <i>Ankrd32</i>  |               |         | Ankrd32  |                              |        |
| <i>Ankrd34c</i> |               |         | Ankrd34c |                              |        |
| <i>Ankrd36</i>  |               | Ankrd36 | Ankrd36  |                              |        |
| <i>Ankrd39</i>  |               | Ankrd39 |          |                              |        |



Suppl. Table 1  
(9/234)

|                | CHIP-Seq hits  |                |                | Unique hits with interactors |                |
|----------------|----------------|----------------|----------------|------------------------------|----------------|
|                | unstimulated   | Ac             | LPS            | Ac                           | LPS            |
| <i>Ankrd40</i> |                |                | <i>Ankrd40</i> |                              | <i>Ankrd40</i> |
| <i>Ankrd42</i> |                |                | <i>Ankrd42</i> |                              |                |
| <i>Ankrd45</i> | <i>Ankrd45</i> |                |                |                              |                |
| <i>Ankrd49</i> |                |                | <i>Ankrd49</i> |                              |                |
| <i>Ankrd50</i> | <i>Ankrd50</i> |                |                |                              |                |
| <i>Ankrd52</i> | <i>Ankrd52</i> |                | <i>Ankrd52</i> |                              |                |
| <i>Ankrd53</i> |                |                | <i>Ankrd53</i> |                              |                |
| <i>Ankrd54</i> | <i>Ankrd54</i> | <i>Ankrd54</i> | <i>Ankrd54</i> |                              |                |
| <i>Ankrd61</i> | <i>Ankrd61</i> | <i>Ankrd61</i> | <i>Ankrd61</i> |                              |                |
| <i>Ankrd66</i> |                |                | <i>Ankrd66</i> |                              |                |
| <i>Ankrd7</i>  | <i>Ankrd7</i>  | <i>Ankrd7</i>  |                |                              |                |
| <i>Anks1</i>   |                | <i>Anks1</i>   |                |                              |                |
| <i>Anks1b</i>  |                | <i>Anks1b</i>  |                |                              |                |
| <i>Ano2</i>    |                | <i>Ano2</i>    |                |                              |                |
| <i>Ano4</i>    | <i>Ano4</i>    | <i>Ano4</i>    |                |                              |                |
| <i>Ano5</i>    | <i>Ano5</i>    | <i>Ano5</i>    | <i>Ano5</i>    |                              |                |
| <i>Ano6</i>    |                | <i>Ano6</i>    |                |                              |                |
| <i>Ano7</i>    | <i>Ano7</i>    |                |                |                              |                |
| <i>Ano9</i>    |                | <i>Ano9</i>    | <i>Ano9</i>    |                              |                |
| <i>Anp32a</i>  |                | <i>Anp32a</i>  |                | <i>Anp32a</i>                |                |
| <i>Anp32b</i>  | <i>Anp32b</i>  |                |                |                              |                |
| <i>Anp32e</i>  |                | <i>Anp32e</i>  | <i>Anp32e</i>  |                              |                |
| <i>Antxr1</i>  |                |                | <i>Antxr1</i>  |                              | <i>Antxr1</i>  |
| <i>Antxr2</i>  |                | <i>Antxr2</i>  | <i>Antxr2</i>  |                              |                |
| <i>Antxrl</i>  | <i>Antxrl</i>  | <i>Antxrl</i>  | <i>Antxrl</i>  |                              |                |
| <i>Anxa1</i>   | <i>Anxa1</i>   |                |                |                              |                |
| <i>Anxa13</i>  |                | <i>Anxa13</i>  |                |                              |                |
| <i>Anxa2</i>   |                | <i>Anxa2</i>   |                |                              |                |
| <i>Anxa3</i>   |                | <i>Anxa3</i>   | <i>Anxa3</i>   |                              |                |
| <i>Anxa4</i>   |                |                | <i>Anxa4</i>   |                              |                |
| <i>Anxa5</i>   |                | <i>Anxa5</i>   |                |                              |                |
| <i>Anxa6</i>   | <i>Anxa6</i>   | <i>Anxa6</i>   |                |                              |                |
| <i>Anxa9</i>   |                |                | <i>Anxa9</i>   |                              |                |
| <i>Aoc3</i>    |                | <i>Aoc3</i>    |                |                              |                |
| <i>Ap1g1</i>   | <i>Ap1g1</i>   |                |                |                              |                |
| <i>Ap1m1</i>   | <i>Ap1m1</i>   |                |                |                              |                |
| <i>Ap1m2</i>   |                |                | <i>Ap1m2</i>   |                              |                |
| <i>Ap1s1</i>   |                | <i>Ap1s1</i>   |                |                              |                |
| <i>Ap1s2</i>   | <i>Ap1s2</i>   |                | <i>Ap1s2</i>   |                              |                |
| <i>Ap2s1</i>   |                | <i>Ap2s1</i>   |                |                              |                |
| <i>Ap3d1</i>   |                | <i>Ap3d1</i>   |                | <i>Ap3d1</i>                 |                |
| <i>Ap3m1</i>   |                |                | <i>Ap3m1</i>   |                              |                |
| <i>Ap3s1</i>   |                | <i>Ap3s1</i>   |                |                              |                |
| <i>Ap3s2</i>   |                |                | <i>Ap3s2</i>   |                              | <i>Ap3s2</i>   |
| <i>Ap4e1</i>   | <i>Ap4e1</i>   | <i>Ap4e1</i>   | <i>Ap4e1</i>   |                              |                |
| <i>Apaf1</i>   | <i>Apaf1</i>   |                | <i>Apaf1</i>   |                              |                |
| <i>Apba1</i>   |                | <i>Apba1</i>   |                | <i>Apba1</i>                 |                |
| <i>Apbb1</i>   |                | <i>Apbb1</i>   |                |                              |                |
| <i>Apbb1ip</i> | <i>Apbb1ip</i> | <i>Apbb1ip</i> |                |                              |                |

Suppl. Table 1  
(10/234)

|                    | CHIP-Seq hits      |                 |                 | Unique hits with interactors |              |
|--------------------|--------------------|-----------------|-----------------|------------------------------|--------------|
|                    | unstimulated       | Ac              | LPS             | Ac                           | LPS          |
| <i>Apbb2</i>       |                    |                 | <i>Apbb2</i>    |                              |              |
| <i>Apbb3</i>       | <i>Apbb3</i>       |                 |                 |                              |              |
| <i>Apcdd1</i>      |                    | <i>Apcdd1</i>   | <i>Apcdd1</i>   |                              |              |
| <i>Apex1</i>       |                    |                 | <i>Apex1</i>    |                              |              |
| <i>Aph1b</i>       |                    | <i>Aph1b</i>    |                 |                              |              |
| <i>Aph1c</i>       |                    |                 | <i>Aph1c</i>    |                              | <i>Aph1c</i> |
| <i>Apip</i>        | <i>Apip</i>        | <i>Apip</i>     | <i>Apip</i>     |                              |              |
| <i>Apitd1</i>      |                    | <i>Apitd1</i>   | <i>Apitd1</i>   |                              |              |
| <i>Aplp1</i>       |                    | <i>Aplp1</i>    |                 | <i>Aplp1</i>                 |              |
| <i>Apoa1bp</i>     |                    | <i>Apoa1bp</i>  |                 | <i>Apoa1bp</i>               |              |
| <i>Apob</i>        |                    | <i>Apob</i>     | <i>Apob</i>     |                              |              |
| <i>Apobec3</i>     |                    | <i>Apobec3</i>  |                 |                              |              |
| <i>Apobr</i>       |                    | <i>Apobr</i>    |                 |                              |              |
| <i>Apoc1</i>       |                    |                 | <i>Apoc1</i>    |                              |              |
| <i>Apoc2</i>       | <i>Apoc2</i>       |                 |                 |                              |              |
| <i>Apoc4-apoc2</i> | <i>Apoc4-apoc2</i> |                 |                 |                              |              |
| <i>Apod</i>        |                    |                 | <i>Apod</i>     |                              | <i>Apod</i>  |
| <i>Apoe</i>        | <i>Apoe</i>        |                 | <i>Apoe</i>     |                              |              |
| <i>Apof</i>        |                    |                 | <i>Apof</i>     |                              |              |
| <i>Apol10a</i>     |                    |                 | <i>Apol10a</i>  |                              |              |
| <i>Apol7d</i>      |                    | <i>Apol7d</i>   |                 |                              |              |
| <i>Apol9a</i>      | <i>Apol9a</i>      | <i>Apol9a</i>   | <i>Apol9a</i>   |                              |              |
| <i>Apol9b</i>      | <i>Apol9b</i>      | <i>Apol9b</i>   | <i>Apol9b</i>   |                              |              |
| <i>Apold1</i>      |                    | <i>Apold1</i>   |                 |                              |              |
| <i>Apom</i>        | <i>Apom</i>        | <i>Apom</i>     | <i>Apom</i>     |                              |              |
| <i>Apoo</i>        |                    |                 | <i>Apoo</i>     |                              |              |
| <i>Apopt1</i>      |                    |                 | <i>Apopt1</i>   |                              |              |
| <i>App</i>         |                    |                 | <i>App</i>      |                              | <i>App</i>   |
| <i>Appbp2</i>      |                    | <i>Appbp2</i>   | <i>Appbp2</i>   |                              |              |
| <i>Appbp2os</i>    |                    | <i>Appbp2os</i> | <i>Appbp2os</i> |                              |              |
| <i>Appl2</i>       |                    |                 | <i>Appl2</i>    |                              | <i>Appl2</i> |
| <i>Aprt</i>        |                    |                 | <i>Aprt</i>     |                              |              |
| <i>Aptx</i>        |                    | <i>Aptx</i>     |                 | <i>Aptx</i>                  |              |
| <i>Aqp1</i>        |                    | <i>Aqp1</i>     |                 |                              |              |
| <i>Aqp4</i>        |                    | <i>Aqp4</i>     |                 | <i>Aqp4</i>                  |              |
| <i>Aqp5</i>        | <i>Aqp5</i>        |                 |                 |                              |              |
| <i>Aqp7</i>        |                    | <i>Aqp7</i>     | <i>Aqp7</i>     |                              |              |
| <i>Aqp9</i>        |                    |                 | <i>Aqp9</i>     |                              |              |
| <i>Arap1</i>       |                    | <i>Arap1</i>    | <i>Arap1</i>    |                              |              |
| <i>Arcn1</i>       |                    |                 | <i>Arcn1</i>    |                              |              |
| <i>Arf1</i>        | <i>Arf1</i>        |                 |                 |                              |              |
| <i>Arf2</i>        |                    | <i>Arf2</i>     | <i>Arf2</i>     |                              |              |
| <i>Arf3</i>        |                    | <i>Arf3</i>     | <i>Arf3</i>     |                              |              |
| <i>Arf4</i>        |                    | <i>Arf4</i>     | <i>Arf4</i>     |                              |              |
| <i>Arfgap2</i>     |                    | <i>Arfgap2</i>  |                 |                              |              |
| <i>Arfgef3</i>     | <i>Arfgef3</i>     |                 | <i>Arfgef3</i>  |                              |              |
| <i>Arfip1</i>      |                    | <i>Arfip1</i>   | <i>Arfip1</i>   |                              |              |
| <i>Arfrp1</i>      | <i>Arfrp1</i>      |                 |                 |                              |              |
| <i>Arg1</i>        |                    | <i>Arg1</i>     | <i>Arg1</i>     |                              |              |

Suppl. Table 1  
(11/234)

|                   | CHIP-Seq hits |          |          | Unique hits with interactors |          |
|-------------------|---------------|----------|----------|------------------------------|----------|
|                   | unstimulated  | Ac       | LPS      | Ac                           | LPS      |
| <i>Arhgap1</i>    | Arhgap1       | Arhgap1  | Arhgap1  |                              |          |
| <i>Arhgap12</i>   |               | Arhgap12 |          | Arhgap12                     |          |
| <i>Arhgap15</i>   | Arhgap15      |          |          |                              |          |
| <i>Arhgap15os</i> | Arhgap15os    |          |          |                              |          |
| <i>Arhgap17</i>   |               |          | Arhgap17 |                              |          |
| <i>Arhgap19</i>   |               |          | Arhgap19 |                              | Arhgap19 |
| <i>Arhgap21</i>   |               |          | Arhgap21 |                              | Arhgap21 |
| <i>Arhgap23</i>   | Arhgap23      |          |          |                              |          |
| <i>Arhgap25</i>   |               | Arhgap25 | Arhgap25 |                              |          |
| <i>Arhgap26</i>   |               | Arhgap26 |          | Arhgap26                     |          |
| <i>Arhgap27</i>   |               | Arhgap27 |          |                              |          |
| <i>Arhgap28</i>   |               | Arhgap28 |          |                              |          |
| <i>Arhgap29</i>   |               | Arhgap29 |          |                              |          |
| <i>Arhgap30</i>   | Arhgap30      |          |          |                              |          |
| <i>Arhgap35</i>   | Arhgap35      |          |          |                              |          |
| <i>Arhgap36</i>   |               | Arhgap36 |          |                              |          |
| <i>Arhgap39</i>   | Arhgap39      | Arhgap39 | Arhgap39 |                              |          |
| <i>Arhgap40</i>   |               | Arhgap40 |          |                              |          |
| <i>Arhgap42</i>   |               | Arhgap42 |          |                              |          |
| <i>Arhgap44</i>   |               | Arhgap44 |          |                              |          |
| <i>Arhgap6</i>    |               |          | Arhgap6  |                              |          |
| <i>Arhgap8</i>    |               |          | Arhgap8  |                              |          |
| <i>Arhgap9</i>    |               | Arhgap9  |          |                              |          |
| <i>Arhgef1</i>    |               |          | Arhgef1  |                              | Arhgef1  |
| <i>Arhgef10</i>   | Arhgef10      |          | Arhgef10 |                              |          |
| <i>Arhgef18</i>   | Arhgef18      | Arhgef18 |          |                              |          |
| <i>Arhgef2</i>    | Arhgef2       |          | Arhgef2  |                              |          |
| <i>Arhgef25</i>   |               |          | Arhgef25 |                              |          |
| <i>Arhgef28</i>   |               | Arhgef28 | Arhgef28 |                              |          |
| <i>Arhgef37</i>   |               |          | Arhgef37 |                              |          |
| <i>Arhgef38</i>   | Arhgef38      |          |          |                              |          |
| <i>Arhgef4</i>    |               | Arhgef4  | Arhgef4  |                              |          |
| <i>Arhgef7</i>    |               | Arhgef7  |          |                              |          |
| <i>Arhgef9</i>    | Arhgef9       |          |          |                              |          |
| <i>Arid1a</i>     | Arid1a        | Arid1a   | Arid1a   |                              |          |
| <i>Arid3c</i>     |               |          | Arid3c   |                              |          |
| <i>Arid4a</i>     |               |          | Arid4a   |                              |          |
| <i>Arid5a</i>     |               | Arid5a   | Arid5a   |                              |          |
| <i>Arl1</i>       |               | Arl1     | Arl1     |                              |          |
| <i>Arl10</i>      |               |          | Arl10    |                              |          |
| <i>Arl11</i>      | Arl11         |          | Arl11    |                              |          |
| <i>Arl13a</i>     |               |          | Arl13a   |                              |          |
| <i>Arl13b</i>     | Arl13b        | Arl13b   | Arl13b   |                              |          |
| <i>Arl14ep</i>    |               | Arl14ep  | Arl14ep  |                              |          |
| <i>Arl14epl</i>   | Arl14epl      |          | Arl14epl |                              |          |
| <i>Arl2</i>       |               |          | Arl2     |                              |          |
| <i>Arl2bp</i>     |               |          | Arl2bp   |                              |          |
| <i>Arl3</i>       |               | Arl3     |          |                              |          |
| <i>Arl4d</i>      | Arl4d         |          |          |                              |          |

Suppl. Table 1  
(12/234)

|                | ChIP-Seq hits |         |         | Unique hits with interactors |        |
|----------------|---------------|---------|---------|------------------------------|--------|
|                | unstimulated  | Ac      | LPS     | Ac                           | LPS    |
| <i>Arl5a</i>   | Arl5a         |         | Arl5a   |                              |        |
| <i>Arl5b</i>   |               |         | Arl5b   |                              |        |
| <i>Arl6ip5</i> |               | Arl6ip5 | Arl6ip5 |                              |        |
| <i>Arl8a</i>   | Arl8a         |         | Arl8a   |                              |        |
| <i>Arl8b</i>   |               |         | Arl8b   |                              |        |
| <i>Armc12</i>  |               | Armc12  |         |                              |        |
| <i>Armc2</i>   |               |         | Armc2   |                              | Armc2  |
| <i>Armc5</i>   | Armc5         |         | Armc5   |                              |        |
| <i>Armc6</i>   | Armc6         | Armc6   | Armc6   |                              |        |
| <i>Armc7</i>   |               | Armc7   |         |                              |        |
| <i>Armc9</i>   |               | Armc9   |         |                              |        |
| <i>Armcx1</i>  |               |         | Armcx1  |                              |        |
| <i>Armt1</i>   | Armt1         |         | Armt1   |                              |        |
| <i>Arnt2</i>   |               |         | Arnt2   |                              |        |
| <i>Arntl2</i>  |               | Arntl2  |         |                              |        |
| <i>Arpc1a</i>  |               |         | Arpc1a  |                              |        |
| <i>Arpc2</i>   |               |         | Arpc2   |                              |        |
| <i>Arpc4</i>   | Arpc4         | Arpc4   | Arpc4   |                              |        |
| <i>Arpc5</i>   |               |         | Arpc5   |                              |        |
| <i>Arpp19</i>  |               |         | Arpp19  |                              | Arpp19 |
| <i>Arpp21</i>  |               | Arpp21  | Arpp21  |                              |        |
| <i>Arrb2</i>   | Arrb2         | Arrb2   | Arrb2   |                              |        |
| <i>Arrdc2</i>  |               | Arrdc2  |         |                              |        |
| <i>Arrdc4</i>  |               |         | Arrdc4  |                              |        |
| <i>Arrdc5</i>  | Arrdc5        | Arrdc5  | Arrdc5  |                              |        |
| <i>Arsi</i>    | Arsi          |         |         |                              |        |
| <i>Arsj</i>    |               | Arsj    |         |                              |        |
| <i>Art1</i>    |               | Art1    | Art1    |                              |        |
| <i>Art2b</i>   |               | Art2b   | Art2b   |                              |        |
| <i>Art3</i>    | Art3          |         |         |                              |        |
| <i>Art4</i>    |               | Art4    |         |                              |        |
| <i>Art5</i>    |               | Art5    | Art5    |                              |        |
| <i>Arx</i>     |               | Arx     | Arx     |                              |        |
| <i>As3mt</i>   |               | As3mt   | As3mt   |                              |        |
| <i>Asb11</i>   |               |         | Asb11   |                              |        |
| <i>Asb12</i>   |               |         | Asb12   |                              |        |
| <i>Asb13</i>   | Asb13         | Asb13   | Asb13   |                              |        |
| <i>Asb14</i>   |               |         | Asb14   |                              |        |
| <i>Asb16</i>   |               | Asb16   | Asb16   |                              |        |
| <i>Asb17</i>   | Asb17         | Asb17   | Asb17   |                              |        |
| <i>Asb17os</i> |               | Asb17os |         |                              |        |
| <i>Asb18</i>   |               | Asb18   |         |                              |        |
| <i>Asb4</i>    | Asb4          |         |         |                              |        |
| <i>Asb6</i>    |               |         | Asb6    |                              |        |
| <i>Asb8</i>    | Asb8          |         | Asb8    |                              |        |
| <i>Ascc1</i>   |               |         | Ascc1   |                              |        |
| <i>Ascc2</i>   |               | Ascc2   |         |                              |        |
| <i>Ascl1</i>   |               | Ascl1   |         | Ascl1                        |        |
| <i>Ascl2</i>   |               |         | Ascl2   |                              |        |

Suppl. Table 1  
(13/234)

|                 | CHIP-Seq hits |         |          | Unique hits with interactors |        |
|-----------------|---------------|---------|----------|------------------------------|--------|
|                 | unstimulated  | Ac      | LPS      | Ac                           | LPS    |
| <i>Ascl4</i>    | Ascl4         |         |          |                              |        |
| <i>Ascl5</i>    |               | Ascl5   |          |                              |        |
| <i>Asf1a</i>    |               | Asf1a   |          |                              |        |
| <i>Asf1b</i>    |               | Asf1b   | Asf1b    |                              |        |
| <i>Ash1l</i>    | Ash1l         |         |          |                              |        |
| <i>Asic1</i>    | Asic1         | Asic1   | Asic1    |                              |        |
| <i>Asic2</i>    |               | Asic2   | Asic2    |                              |        |
| <i>Asic3</i>    |               |         | Asic3    |                              |        |
| <i>Asl</i>      |               |         | Asl      |                              |        |
| <i>Asmt</i>     | Asmt          |         |          |                              |        |
| <i>Asns</i>     |               |         | Asns     |                              |        |
| <i>Aspa</i>     |               |         | Aspa     |                              |        |
| <i>Aspdh</i>    |               | Aspdh   |          |                              |        |
| <i>Asph</i>     | Asph          | Asph    |          |                              |        |
| <i>Asphd1</i>   |               | Asphd1  |          |                              |        |
| <i>Asphd2</i>   |               | Asphd2  |          |                              |        |
| <i>Aspscr1</i>  |               | Aspscr1 |          |                              |        |
| <i>Asrgl1</i>   |               | Asrgl1  | Asrgl1   |                              |        |
| <i>Aste1</i>    |               | Aste1   | Aste1    |                              |        |
| <i>Asun</i>     |               |         | Asun     |                              |        |
| <i>Asxl2</i>    |               | Asxl2   |          | Asxl2                        |        |
| <i>Atad2</i>    |               |         | Atad2    |                              | Atad2  |
| <i>Atad3a</i>   |               | Atad3a  | Atad3a   |                              |        |
| <i>Atad3aos</i> |               |         | Atad3aos |                              |        |
| <i>Atcay</i>    | Atcay         | Atcay   |          |                              |        |
| <i>Atcayos</i>  |               |         | Atcayos  |                              |        |
| <i>Ate1</i>     |               | Ate1    | Ate1     |                              |        |
| <i>Atf2</i>     |               |         | Atf2     |                              | Atf2   |
| <i>Atf3</i>     |               | Atf3    | Atf3     |                              |        |
| <i>Atf4</i>     |               | Atf4    | Atf4     |                              |        |
| <i>Atf5</i>     |               | Atf5    |          | Atf5                         |        |
| <i>Atf6</i>     | Atf6          |         | Atf6     |                              |        |
| <i>Atf7</i>     | Atf7          |         |          |                              |        |
| <i>Atf7ip</i>   |               |         | Atf7ip   |                              | Atf7ip |
| <i>Atg10</i>    |               | Atg10   |          | Atg10                        |        |
| <i>Atg12</i>    |               |         | Atg12    |                              |        |
| <i>Atg13</i>    |               | Atg13   |          |                              |        |
| <i>Atg14</i>    |               |         | Atg14    |                              |        |
| <i>Atg16l1</i>  | Atg16l1       | Atg16l1 | Atg16l1  |                              |        |
| <i>Atg2a</i>    | Atg2a         |         |          |                              |        |
| <i>Atg2b</i>    | Atg2b         | Atg2b   | Atg2b    |                              |        |
| <i>Atg3</i>     | Atg3          |         |          |                              |        |
| <i>Atg4a</i>    |               | Atg4a   |          |                              |        |
| <i>Atg4b</i>    |               |         | Atg4b    |                              |        |
| <i>Atg4d</i>    | Atg4d         |         |          |                              |        |
| <i>Atg5</i>     | Atg5          |         |          |                              |        |
| <i>Atg7</i>     |               | Atg7    |          |                              |        |
| <i>Atg9b</i>    | Atg9b         |         |          |                              |        |
| <i>Athl1</i>    |               |         | Athl1    |                              |        |

Suppl. Table 1  
(14/234)

|                    | CHIP-Seq hits   |                    |                 | Unique hits with interactors |               |
|--------------------|-----------------|--------------------|-----------------|------------------------------|---------------|
|                    | unstimulated    | Ac                 | LPS             | Ac                           | LPS           |
| <i>Atl1</i>        | <i>Atl1</i>     | <i>Atl1</i>        | <i>Atl1</i>     |                              |               |
| <i>Atl3</i>        |                 | <i>Atl3</i>        |                 |                              |               |
| <i>Atm</i>         |                 | <i>Atm</i>         |                 | <i>Atm</i>                   |               |
| <i>Atmin</i>       |                 | <i>Atmin</i>       |                 |                              |               |
| <i>Atoh1</i>       |                 |                    | <i>Atoh1</i>    |                              | <i>Atoh1</i>  |
| <i>Atp10a</i>      |                 | <i>Atp10a</i>      |                 |                              |               |
| <i>Atp10d</i>      | <i>Atp10d</i>   | <i>Atp10d</i>      |                 |                              |               |
| <i>Atp11c</i>      |                 | <i>Atp11c</i>      | <i>Atp11c</i>   |                              |               |
| <i>Atp13a4</i>     |                 |                    | <i>Atp13a4</i>  |                              |               |
| <i>Atp1a4</i>      |                 | <i>Atp1a4</i>      |                 |                              |               |
| <i>Atp1b2</i>      |                 | <i>Atp1b2</i>      | <i>Atp1b2</i>   |                              |               |
| <i>Atp1b3</i>      |                 | <i>Atp1b3</i>      | <i>Atp1b3</i>   |                              |               |
| <i>Atp2a2</i>      | <i>Atp2a2</i>   | <i>Atp2a2</i>      | <i>Atp2a2</i>   |                              |               |
| <i>Atp2b1</i>      |                 | <i>Atp2b1</i>      |                 |                              |               |
| <i>Atp2b3</i>      |                 |                    | <i>Atp2b3</i>   |                              |               |
| <i>Atp2b4</i>      | <i>Atp2b4</i>   |                    | <i>Atp2b4</i>   |                              |               |
| <i>Atp4b</i>       | <i>Atp4b</i>    |                    |                 |                              |               |
| <i>Atp5b</i>       | <i>Atp5b</i>    |                    | <i>Atp5b</i>    |                              |               |
| <i>Atp5c1</i>      |                 | <i>Atp5c1</i>      |                 |                              |               |
| <i>Atp5f1</i>      |                 | <i>Atp5f1</i>      |                 |                              |               |
| <i>Atp5g1</i>      |                 |                    | <i>Atp5g1</i>   |                              |               |
| <i>Atp5g2</i>      | <i>Atp5g2</i>   | <i>Atp5g2</i>      |                 |                              |               |
| <i>Atp5g3</i>      |                 | <i>Atp5g3</i>      |                 | <i>Atp5g3</i>                |               |
| <i>Atp5j</i>       | <i>Atp5j</i>    |                    |                 |                              |               |
| <i>Atp5l</i>       | <i>Atp5l</i>    |                    |                 |                              |               |
| <i>Atp5sl</i>      |                 |                    | <i>Atp5sl</i>   |                              |               |
| <i>Atp6ap1</i>     |                 | <i>Atp6ap1</i>     | <i>Atp6ap1</i>  |                              |               |
| <i>Atp6v0a1</i>    | <i>Atp6v0a1</i> | <i>Atp6v0a1</i>    | <i>Atp6v0a1</i> |                              |               |
| <i>Atp6v0c</i>     |                 | <i>Atp6v0c</i>     |                 | <i>Atp6v0c</i>               |               |
| <i>Atp6v0c-ps2</i> |                 | <i>Atp6v0c-ps2</i> |                 |                              |               |
| <i>Atp6v0e</i>     |                 | <i>Atp6v0e</i>     |                 |                              |               |
| <i>Atp6v1b2</i>    |                 | <i>Atp6v1b2</i>    |                 |                              |               |
| <i>Atp6v1c1</i>    |                 | <i>Atp6v1c1</i>    |                 |                              |               |
| <i>Atp6v1c2</i>    |                 |                    | <i>Atp6v1c2</i> |                              |               |
| <i>Atp6v1d</i>     | <i>Atp6v1d</i>  | <i>Atp6v1d</i>     |                 |                              |               |
| <i>Atp6v1e2</i>    |                 | <i>Atp6v1e2</i>    | <i>Atp6v1e2</i> |                              |               |
| <i>Atp6v1f</i>     |                 |                    | <i>Atp6v1f</i>  |                              |               |
| <i>Atp6v1g2</i>    |                 | <i>Atp6v1g2</i>    | <i>Atp6v1g2</i> |                              |               |
| <i>Atp6v1h</i>     |                 |                    | <i>Atp6v1h</i>  |                              |               |
| <i>Atp8a1</i>      |                 | <i>Atp8a1</i>      |                 |                              |               |
| <i>Atp8a2</i>      | <i>Atp8a2</i>   |                    | <i>Atp8a2</i>   |                              |               |
| <i>Atp8b1</i>      |                 |                    | <i>Atp8b1</i>   |                              | <i>Atp8b1</i> |
| <i>Atp8b4</i>      |                 | <i>Atp8b4</i>      |                 |                              |               |
| <i>Atp9a</i>       |                 | <i>Atp9a</i>       |                 |                              |               |
| <i>Atpif1</i>      |                 | <i>Atpif1</i>      |                 |                              |               |
| <i>Atraid</i>      | <i>Atraid</i>   | <i>Atraid</i>      | <i>Atraid</i>   |                              |               |
| <i>Atrip</i>       |                 | <i>Atrip</i>       |                 |                              |               |
| <i>Atrn</i>        |                 | <i>Atrn</i>        |                 | <i>Atrn</i>                  |               |
| <i>Atxn1</i>       | <i>Atxn1</i>    | <i>Atxn1</i>       | <i>Atxn1</i>    |                              |               |

Suppl. Table 1  
(15/234)

|                   | CHIP-Seq hits     |                   |                 | Unique hits with interactors |              |
|-------------------|-------------------|-------------------|-----------------|------------------------------|--------------|
|                   | unstimulated      | Ac                | LPS             | Ac                           | LPS          |
| <i>Atxn10</i>     | <i>Atxn10</i>     |                   |                 |                              |              |
| <i>Atxn1l</i>     | <i>Atxn1l</i>     |                   | <i>Atxn1l</i>   |                              |              |
| <i>Atxn2</i>      |                   |                   | <i>Atxn2</i>    |                              |              |
| <i>Atxn2l</i>     |                   |                   | <i>Atxn2l</i>   |                              |              |
| <i>Atxn3</i>      |                   |                   | <i>Atxn3</i>    |                              | <i>Atxn3</i> |
| <i>Atxn7</i>      |                   |                   | <i>Atxn7</i>    |                              | <i>Atxn7</i> |
| <i>Atxn7l1</i>    | <i>Atxn7l1</i>    | <i>Atxn7l1</i>    |                 |                              |              |
| <i>Atxn7l1os2</i> | <i>Atxn7l1os2</i> | <i>Atxn7l1os2</i> |                 |                              |              |
| <i>Atxn7l2</i>    |                   | <i>Atxn7l2</i>    | <i>Atxn7l2</i>  |                              |              |
| <i>Atxn7l3</i>    | <i>Atxn7l3</i>    |                   | <i>Atxn7l3</i>  |                              |              |
| <i>AU015228</i>   | <i>AU015228</i>   | <i>AU015228</i>   | <i>AU015228</i> |                              |              |
| <i>AU015791</i>   |                   | <i>AU015791</i>   |                 |                              |              |
| <i>AU015836</i>   |                   | <i>AU015836</i>   |                 |                              |              |
| <i>AU016765</i>   |                   | <i>AU016765</i>   |                 |                              |              |
| <i>AU018091</i>   |                   |                   | <i>AU018091</i> |                              |              |
| <i>AU019823</i>   |                   | <i>AU019823</i>   |                 |                              |              |
| <i>AU019990</i>   |                   | <i>AU019990</i>   |                 |                              |              |
| <i>AU021063</i>   | <i>AU021063</i>   |                   | <i>AU021063</i> |                              |              |
| <i>AU040972</i>   |                   |                   | <i>AU040972</i> |                              |              |
| <i>Auh</i>        |                   | <i>Auh</i>        |                 |                              |              |
| <i>Aunip</i>      |                   | <i>Aunip</i>      |                 |                              |              |
| <i>Aup1</i>       |                   | <i>Aup1</i>       | <i>Aup1</i>     |                              |              |
| <i>Aurkaip1</i>   | <i>Aurkaip1</i>   | <i>Aurkaip1</i>   |                 |                              |              |
| <i>Aurkb</i>      | <i>Aurkb</i>      |                   |                 |                              |              |
| <i>AV051173</i>   |                   | <i>AV051173</i>   |                 |                              |              |
| <i>AV064505</i>   |                   | <i>AV064505</i>   | <i>AV064505</i> |                              |              |
| <i>AV320801</i>   |                   | <i>AV320801</i>   |                 |                              |              |
| <i>Aven</i>       |                   |                   | <i>Aven</i>     |                              |              |
| <i>Avil</i>       | <i>Avil</i>       |                   |                 |                              |              |
| <i>Avl9</i>       |                   |                   | <i>Avl9</i>     |                              | <i>Avl9</i>  |
| <i>Avpr1a</i>     |                   |                   | <i>Avpr1a</i>   |                              |              |
| <i>Avpr1b</i>     |                   | <i>Avpr1b</i>     |                 |                              |              |
| <i>AW011738</i>   | <i>AW011738</i>   |                   | <i>AW011738</i> |                              |              |
| <i>AW046200</i>   |                   |                   | <i>AW046200</i> |                              |              |
| <i>AW146154</i>   |                   | <i>AW146154</i>   |                 |                              |              |
| <i>AW209491</i>   | <i>AW209491</i>   | <i>AW209491</i>   |                 |                              |              |
| <i>AW495222</i>   |                   | <i>AW495222</i>   |                 |                              |              |
| <i>AW549542</i>   | <i>AW549542</i>   | <i>AW549542</i>   | <i>AW549542</i> |                              |              |
| <i>AW549877</i>   |                   | <i>AW549877</i>   | <i>AW549877</i> |                              |              |
| <i>AW551984</i>   |                   | <i>AW551984</i>   |                 |                              |              |
| <i>AW554918</i>   |                   | <i>AW554918</i>   |                 |                              |              |
| <i>Axl</i>        | <i>Axl</i>        | <i>Axl</i>        |                 |                              |              |
| <i>AY074887</i>   |                   | <i>AY074887</i>   |                 | <i>AY074887</i>              |              |
| <i>AY702102</i>   | <i>AY702102</i>   | <i>AY702102</i>   | <i>AY702102</i> |                              |              |
| <i>AY702103</i>   |                   |                   | <i>AY702103</i> |                              |              |
| <i>AY761185</i>   |                   | <i>AY761185</i>   |                 |                              |              |
| <i>Azgp1</i>      | <i>Azgp1</i>      |                   | <i>Azgp1</i>    |                              |              |
| <i>Azi2</i>       | <i>Azi2</i>       | <i>Azi2</i>       |                 |                              |              |
| <i>Azin1</i>      |                   | <i>Azin1</i>      |                 |                              |              |

Suppl. Table 1  
(16/234)

|                      | CHIP-Seq hits        |                      |                      | Unique hits with interactors |             |
|----------------------|----------------------|----------------------|----------------------|------------------------------|-------------|
|                      | unstimulated         | Ac                   | LPS                  | Ac                           | LPS         |
| <i>B020004J07Rik</i> |                      |                      | <i>B020004J07Rik</i> |                              |             |
| <i>B020014A21Rik</i> | <i>B020014A21Rik</i> |                      |                      |                              |             |
| <i>B130034C11Rik</i> | <i>B130034C11Rik</i> | <i>B130034C11Rik</i> |                      |                              |             |
| <i>B230118H07Rik</i> |                      | <i>B230118H07Rik</i> |                      |                              |             |
| <i>B230206H07Rik</i> |                      | <i>B230206H07Rik</i> |                      |                              |             |
| <i>B230208H11Rik</i> |                      |                      | <i>B230208H11Rik</i> |                              |             |
| <i>B230216N24Rik</i> |                      |                      | <i>B230216N24Rik</i> |                              |             |
| <i>B230217C12Rik</i> |                      | <i>B230217C12Rik</i> | <i>B230217C12Rik</i> |                              |             |
| <i>B230219D22Rik</i> |                      |                      | <i>B230219D22Rik</i> |                              |             |
| <i>B230319C09Rik</i> |                      | <i>B230319C09Rik</i> |                      |                              |             |
| <i>B230323A14Rik</i> |                      | <i>B230323A14Rik</i> |                      |                              |             |
| <i>B2m</i>           |                      | <i>B2m</i>           | <i>B2m</i>           |                              |             |
| <i>B330016D10Rik</i> |                      |                      | <i>B330016D10Rik</i> |                              |             |
| <i>B3galnt1</i>      |                      | <i>B3galnt1</i>      |                      | <i>B3galnt1</i>              |             |
| <i>B3galt1</i>       | <i>B3galt1</i>       |                      |                      |                              |             |
| <i>B3galt2</i>       |                      | <i>B3galt2</i>       | <i>B3galt2</i>       |                              |             |
| <i>B3galt4</i>       |                      | <i>B3galt4</i>       | <i>B3galt4</i>       |                              |             |
| <i>B3galt6</i>       |                      | <i>B3galt6</i>       | <i>B3galt6</i>       |                              |             |
| <i>B3gat1</i>        | <i>B3gat1</i>        |                      |                      |                              |             |
| <i>B3gat3</i>        | <i>B3gat3</i>        |                      |                      |                              |             |
| <i>B3gnt5</i>        |                      |                      | <i>B3gnt5</i>        |                              |             |
| <i>B3gnt7</i>        |                      | <i>B3gnt7</i>        |                      |                              |             |
| <i>B430010I23Rik</i> |                      |                      | <i>B430010I23Rik</i> |                              |             |
| <i>B430319G15Rik</i> |                      | <i>B430319G15Rik</i> | <i>B430319G15Rik</i> |                              |             |
| <i>B4galnt3</i>      | <i>B4galnt3</i>      |                      |                      |                              |             |
| <i>B4galnt4</i>      |                      |                      | <i>B4galnt4</i>      |                              |             |
| <i>B4galt2</i>       |                      | <i>B4galt2</i>       |                      |                              |             |
| <i>B4galt3</i>       |                      |                      | <i>B4galt3</i>       |                              |             |
| <i>B4galt6</i>       | <i>B4galt6</i>       |                      | <i>B4galt6</i>       |                              |             |
| <i>B930018H19Rik</i> | <i>B930018H19Rik</i> |                      |                      |                              |             |
| <i>B9d2</i>          |                      |                      | <i>B9d2</i>          |                              |             |
| <i>Baalc</i>         |                      | <i>Baalc</i>         |                      |                              |             |
| <i>Bace1</i>         | <i>Bace1</i>         | <i>Bace1</i>         | <i>Bace1</i>         |                              |             |
| <i>Bace2</i>         |                      | <i>Bace2</i>         |                      |                              |             |
| <i>Bach2os</i>       |                      | <i>Bach2os</i>       |                      |                              |             |
| <i>Bad</i>           |                      |                      | <i>Bad</i>           |                              |             |
| <i>Bag2</i>          |                      | <i>Bag2</i>          |                      |                              |             |
| <i>Bag3</i>          |                      |                      | <i>Bag3</i>          |                              | <i>Bag3</i> |
| <i>Bag5</i>          |                      | <i>Bag5</i>          |                      |                              |             |
| <i>Bag6</i>          | <i>Bag6</i>          | <i>Bag6</i>          | <i>Bag6</i>          |                              |             |
| <i>Bahcc1</i>        | <i>Bahcc1</i>        |                      |                      |                              |             |
| <i>Baiap2l2</i>      |                      | <i>Baiap2l2</i>      |                      |                              |             |
| <i>Bak1</i>          | <i>Bak1</i>          |                      |                      |                              |             |
| <i>Bambi</i>         | <i>Bambi</i>         |                      |                      |                              |             |
| <i>Bambi-ps1</i>     | <i>Bambi-ps1</i>     |                      | <i>Bambi-ps1</i>     |                              |             |
| <i>Banf1</i>         |                      |                      | <i>Banf1</i>         |                              |             |
| <i>Banp</i>          |                      |                      | <i>Banp</i>          |                              | <i>Banp</i> |
| <i>Bard1</i>         | <i>Bard1</i>         |                      |                      |                              |             |
| <i>Barhl1</i>        | <i>Barhl1</i>        | <i>Barhl1</i>        |                      |                              |             |



Suppl. Table 1  
(17/234)

|                 | CHIP-Seq hits |          |          | Unique hits with interactors |          |
|-----------------|---------------|----------|----------|------------------------------|----------|
|                 | unstimulated  | Ac       | LPS      | Ac                           | LPS      |
| <i>Barhl2</i>   |               | Barhl2   |          |                              |          |
| <i>Batf3</i>    |               | Batf3    |          |                              |          |
| <i>Bax</i>      |               | Bax      | Bax      |                              |          |
| <i>Baz1a</i>    |               | Baz1a    |          |                              |          |
| <i>Baz1b</i>    |               |          | Baz1b    |                              |          |
| <i>Baz2a</i>    | Baz2a         |          | Baz2a    |                              |          |
| <i>Baz2b</i>    |               |          | Baz2b    |                              |          |
| <i>BB019430</i> |               |          | BB019430 |                              |          |
| <i>BB031773</i> |               | BB031773 | BB031773 |                              |          |
| <i>BB123696</i> | BB123696      | BB123696 |          |                              |          |
| <i>BB287469</i> |               |          | BB287469 |                              |          |
| <i>BB557941</i> |               |          | BB557941 |                              |          |
| <i>Bbc3</i>     |               | Bbc3     |          | Bbc3                         |          |
| <i>Bbip1</i>    |               | Bbip1    |          | Bbip1                        |          |
| <i>Bbox1</i>    | Bbox1         |          |          |                              |          |
| <i>Bbs1</i>     |               |          | Bbs1     |                              | Bbs1     |
| <i>Bbs12</i>    |               | Bbs12    |          |                              |          |
| <i>Bbs4</i>     |               |          | Bbs4     |                              |          |
| <i>Bbs9</i>     | Bbs9          |          |          |                              |          |
| <i>Bbx</i>      |               | Bbx      | Bbx      |                              |          |
| <i>BC003965</i> | BC003965      | BC003965 | BC003965 |                              |          |
| <i>BC005537</i> |               |          | BC005537 |                              |          |
| <i>BC016579</i> |               | BC016579 |          |                              |          |
| <i>BC017643</i> |               | BC017643 | BC017643 |                              |          |
| <i>BC020402</i> |               | BC020402 |          |                              |          |
| <i>BC021614</i> |               | BC021614 |          |                              |          |
| <i>BC021767</i> |               | BC021767 |          |                              |          |
| <i>BC021891</i> |               |          | BC021891 |                              |          |
| <i>BC024139</i> | BC024139      |          |          |                              |          |
| <i>BC024386</i> | BC024386      |          |          |                              |          |
| <i>BC024978</i> |               |          | BC024978 |                              |          |
| <i>BC027231</i> |               | BC027231 | BC027231 |                              |          |
| <i>BC028528</i> |               | BC028528 |          |                              |          |
| <i>BC030499</i> |               | BC030499 | BC030499 |                              |          |
| <i>BC030867</i> |               |          | BC030867 |                              |          |
| <i>BC037034</i> |               |          | BC037034 |                              | BC037034 |
| <i>BC039771</i> |               | BC039771 |          |                              |          |
| <i>BC039966</i> | BC039966      |          |          |                              |          |
| <i>BC046251</i> |               | BC046251 |          |                              |          |
| <i>BC048562</i> |               | BC048562 |          |                              |          |
| <i>BC048609</i> | BC048609      | BC048609 | BC048609 |                              |          |
| <i>BC048644</i> |               |          | BC048644 |                              |          |
| <i>BC048679</i> |               |          | BC048679 |                              |          |
| <i>BC049762</i> | BC049762      |          |          |                              |          |
| <i>BC051142</i> |               |          | BC051142 |                              |          |
| <i>BC051628</i> |               | BC051628 |          |                              |          |
| <i>BC052040</i> |               | BC052040 |          |                              |          |
| <i>BC052688</i> |               |          | BC052688 |                              |          |
| <i>BC053393</i> | BC053393      | BC053393 | BC053393 |                              |          |

Suppl. Table 1  
(18/234)

|                 | CHIP-Seq hits |          |          | Unique hits with interactors |        |
|-----------------|---------------|----------|----------|------------------------------|--------|
|                 | unstimulated  | Ac       | LPS      | Ac                           | LPS    |
| <i>BC055111</i> |               |          | BC055111 |                              |        |
| <i>BC055324</i> |               |          | BC055324 |                              |        |
| <i>BC055402</i> |               | BC055402 |          |                              |        |
| <i>BC061195</i> |               | BC061195 |          |                              |        |
| <i>BC064078</i> | BC064078      |          |          |                              |        |
| <i>BC089491</i> |               |          | BC089491 |                              |        |
| <i>BC094916</i> | BC094916      |          | BC094916 |                              |        |
| <i>Bc1</i>      |               |          | Bc1      |                              |        |
| <i>BC100451</i> |               | BC100451 |          |                              |        |
| <i>Bcam</i>     | Bcam          |          |          |                              |        |
| <i>Bcar1</i>    | Bcar1         |          |          |                              |        |
| <i>Bcas1</i>    |               | Bcas1    |          | Bcas1                        |        |
| <i>Bcas2</i>    |               | Bcas2    |          | Bcas2                        |        |
| <i>Bcas3</i>    |               |          | Bcas3    |                              |        |
| <i>Bcas3os1</i> |               | Bcas3os1 |          |                              |        |
| <i>Bcat2</i>    | Bcat2         |          | Bcat2    |                              |        |
| <i>Bccip</i>    |               |          | Bccip    |                              |        |
| <i>Bcdin3d</i>  | Bcdin3d       | Bcdin3d  | Bcdin3d  |                              |        |
| <i>Bche</i>     |               | Bche     |          |                              |        |
| <i>Bckdhb</i>   |               |          | Bckdhb   |                              |        |
| <i>Bcl11a</i>   | Bcl11a        | Bcl11a   | Bcl11a   |                              |        |
| <i>Bcl2</i>     | Bcl2          |          | Bcl2     |                              |        |
| <i>Bcl2a1d</i>  |               | Bcl2a1d  |          |                              |        |
| <i>Bcl2l1</i>   |               |          | Bcl2l1   |                              | Bcl2l1 |
| <i>Bcl2l10</i>  | Bcl2l10       | Bcl2l10  |          |                              |        |
| <i>Bcl2l12</i>  | Bcl2l12       | Bcl2l12  | Bcl2l12  |                              |        |
| <i>Bcl2l13</i>  |               |          | Bcl2l13  |                              |        |
| <i>Bcl2l2</i>   | Bcl2l2        | Bcl2l2   |          |                              |        |
| <i>Bcl3</i>     |               | Bcl3     | Bcl3     |                              |        |
| <i>Bcl6b</i>    | Bcl6b         |          |          |                              |        |
| <i>Bcl7a</i>    |               | Bcl7a    |          | Bcl7a                        |        |
| <i>Bcl7b</i>    |               |          | Bcl7b    |                              |        |
| <i>Bcl7c</i>    |               | Bcl7c    |          |                              |        |
| <i>Bcl9</i>     |               | Bcl9     |          |                              |        |
| <i>Bcl9l</i>    |               |          | Bcl9l    |                              |        |
| <i>Bclaf1</i>   | Bclaf1        |          |          |                              |        |
| <i>Bco2</i>     |               |          | Bco2     |                              |        |
| <i>Bdh1</i>     |               | Bdh1     | Bdh1     |                              |        |
| <i>Bdh2</i>     |               | Bdh2     |          |                              |        |
| <i>Bdnf</i>     |               |          | Bdnf     |                              | Bdnf   |
| <i>Bdp1</i>     |               |          | Bdp1     |                              | Bdp1   |
| <i>Bean1</i>    |               |          | Bean1    |                              | Bean1  |
| <i>Becn1</i>    |               | Becn1    | Becn1    |                              |        |
| <i>Becn2</i>    |               |          | Becn2    |                              |        |
| <i>Bend3</i>    | Bend3         |          | Bend3    |                              |        |
| <i>Bend4</i>    |               | Bend4    |          | Bend4                        |        |
| <i>Bend6</i>    |               | Bend6    | Bend6    |                              |        |
| <i>Bend7</i>    |               |          | Bend7    |                              |        |
| <i>Bet1l</i>    |               | Bet1l    |          |                              |        |

Suppl. Table 1  
(19/234)

|                  | CHIP-Seq hits |         |           | Unique hits with interactors |       |
|------------------|---------------|---------|-----------|------------------------------|-------|
|                  | unstimulated  | Ac      | LPS       | Ac                           | LPS   |
| <i>Bex1</i>      | Bex1          |         |           |                              |       |
| <i>Bex2</i>      |               | Bex2    |           |                              |       |
| <i>Bex6</i>      | Bex6          | Bex6    |           |                              |       |
| <i>Bfar</i>      |               |         | Bfar      |                              | Bfar  |
| <i>Bglap</i>     | Bglap         | Bglap   |           |                              |       |
| <i>Bglap2</i>    | Bglap2        |         |           |                              |       |
| <i>Bglap3</i>    |               |         | Bglap3    |                              |       |
| <i>Bgn</i>       | Bgn           |         |           |                              |       |
| <i>Bhlha9</i>    |               | Bhlha9  | Bhlha9    |                              |       |
| <i>Bhlhe40</i>   | Bhlhe40       |         | Bhlhe40   |                              |       |
| <i>Bhlhe41</i>   |               | Bhlhe41 |           | Bhlhe41                      |       |
| <i>Bhmt</i>      |               | Bhmt    |           |                              |       |
| <i>Bhmt2</i>     |               |         | Bhmt2     |                              |       |
| <i>Bicd1</i>     |               | Bicd1   | Bicd1     |                              |       |
| <i>Bik</i>       | Bik           |         |           |                              |       |
| <i>Bin1</i>      |               |         | Bin1      |                              |       |
| <i>Birc2</i>     |               | Birc2   |           |                              |       |
| <i>Birc5</i>     | Birc5         |         | Birc5     |                              |       |
| <i>Birc6</i>     |               |         | Birc6     |                              |       |
| <i>Birc7</i>     |               |         | Birc7     |                              |       |
| <i>Blk</i>       |               | Blk     |           |                              |       |
| <i>Blm</i>       |               | Blm     |           |                              |       |
| <i>Blmh</i>      | Blmh          | Blmh    | Blmh      |                              |       |
| <i>Bloc1s3</i>   | Bloc1s3       | Bloc1s3 | Bloc1s3   |                              |       |
| <i>Bloc1s4</i>   | Bloc1s4       |         | Bloc1s4   |                              |       |
| <i>Bloc1s6</i>   |               | Bloc1s6 | Bloc1s6   |                              |       |
| <i>Bloodlinc</i> |               |         | Bloodlinc |                              |       |
| <i>Blvra</i>     |               | Blvra   | Blvra     |                              |       |
| <i>Bmf</i>       | Bmf           | Bmf     | Bmf       |                              |       |
| <i>Bmp10</i>     | Bmp10         |         |           |                              |       |
| <i>Bmp15</i>     |               |         | Bmp15     |                              | Bmp15 |
| <i>Bmp3</i>      | Bmp3          |         |           |                              |       |
| <i>Bmp4</i>      |               |         | Bmp4      |                              | Bmp4  |
| <i>Bmp5</i>      |               | Bmp5    | Bmp5      |                              |       |
| <i>Bmpr1a</i>    |               | Bmpr1a  | Bmpr1a    |                              |       |
| <i>Bmpr2</i>     |               |         | Bmpr2     |                              |       |
| <i>Bnc1</i>      |               |         | Bnc1      |                              |       |
| <i>Bnip1</i>     |               | Bnip1   |           |                              |       |
| <i>Bnip3</i>     |               |         | Bnip3     |                              |       |
| <i>Bnipl</i>     |               |         | Bnipl     |                              |       |
| <i>Boc</i>       |               |         | Boc       |                              |       |
| <i>Bod1</i>      |               |         | Bod1      |                              |       |
| <i>Bod1l</i>     |               | Bod1l   | Bod1l     |                              |       |
| <i>Bola1</i>     |               |         | Bola1     |                              |       |
| <i>Bola2</i>     | Bola2         | Bola2   |           |                              |       |
| <i>Bora</i>      |               | Bora    |           |                              |       |
| <i>Borg</i>      |               | Borg    |           |                              |       |
| <i>Bpgm</i>      |               | Bpgm    |           |                              |       |
| <i>Bphl</i>      |               | Bphl    |           |                              |       |

Suppl. Table 1  
(20/234)

|                | ChIP-Seq hits |                |               | Unique hits with interactors |              |
|----------------|---------------|----------------|---------------|------------------------------|--------------|
|                | unstimulated  | Ac             | LPS           | Ac                           | LPS          |
| <i>Bpi</i>     |               |                | <i>Bpi</i>    |                              |              |
| <i>Bpifa2</i>  | <i>Bpifa2</i> |                |               |                              |              |
| <i>Bpifa5</i>  |               | <i>Bpifa5</i>  |               |                              |              |
| <i>Bpifb9b</i> |               | <i>Bpifb9b</i> |               |                              |              |
| <i>Bpifc</i>   | <i>Bpifc</i>  |                |               |                              |              |
| <i>Bpnt1</i>   |               |                | <i>Bpnt1</i>  |                              | <i>Bpnt1</i> |
| <i>Bptf</i>    |               | <i>Bptf</i>    | <i>Bptf</i>   |                              |              |
| <i>Brap</i>    |               | <i>Brap</i>    |               |                              |              |
| <i>Brat1</i>   |               | <i>Brat1</i>   | <i>Brat1</i>  |                              |              |
| <i>Brca1</i>   |               | <i>Brca1</i>   |               |                              |              |
| <i>Brca2</i>   | <i>Brca2</i>  |                | <i>Brca2</i>  |                              |              |
| <i>Brd2</i>    |               |                | <i>Brd2</i>   |                              |              |
| <i>Brd3</i>    |               |                | <i>Brd3</i>   |                              | <i>Brd3</i>  |
| <i>Brd4</i>    |               |                | <i>Brd4</i>   |                              |              |
| <i>Brd7</i>    |               | <i>Brd7</i>    | <i>Brd7</i>   |                              |              |
| <i>Brd8</i>    |               |                | <i>Brd8</i>   |                              |              |
| <i>Brd9</i>    | <i>Brd9</i>   |                |               |                              |              |
| <i>Bre</i>     |               | <i>Bre</i>     |               |                              |              |
| <i>Brf1</i>    | <i>Brf1</i>   | <i>Brf1</i>    | <i>Brf1</i>   |                              |              |
| <i>Bri3</i>    |               | <i>Bri3</i>    | <i>Bri3</i>   |                              |              |
| <i>Bricd5</i>  |               | <i>Bricd5</i>  |               |                              |              |
| <i>Brinp2</i>  |               | <i>Brinp2</i>  |               |                              |              |
| <i>Brip1os</i> |               | <i>Brip1os</i> |               |                              |              |
| <i>Brk1</i>    |               | <i>Brk1</i>    |               |                              |              |
| <i>Brms1</i>   |               | <i>Brms1</i>   |               |                              |              |
| <i>Brms1l</i>  |               | <i>Brms1l</i>  |               | <i>Brms1l</i>                |              |
| <i>Brox</i>    | <i>Brox</i>   |                |               |                              |              |
| <i>Brpf3</i>   |               | <i>Brpf3</i>   |               |                              |              |
| <i>Brs3</i>    |               |                | <i>Brs3</i>   |                              |              |
| <i>Brsk1</i>   | <i>Brsk1</i>  |                |               |                              |              |
| <i>Brsk2</i>   |               |                | <i>Brsk2</i>  |                              |              |
| <i>Brwd1</i>   |               | <i>Brwd1</i>   |               | <i>Brwd1</i>                 |              |
| <i>Bscl2</i>   |               |                | <i>Bscl2</i>  |                              |              |
| <i>Bsdc1</i>   |               |                | <i>Bsdc1</i>  |                              |              |
| <i>Bsg</i>     |               |                | <i>Bsg</i>    |                              |              |
| <i>Bsph2</i>   |               | <i>Bsph2</i>   | <i>Bsph2</i>  |                              |              |
| <i>Bspry</i>   |               | <i>Bspry</i>   | <i>Bspry</i>  |                              |              |
| <i>Bsx</i>     |               | <i>Bsx</i>     |               | <i>Bsx</i>                   |              |
| <i>Btbd1</i>   |               | <i>Btbd1</i>   | <i>Btbd1</i>  |                              |              |
| <i>Btbd10</i>  |               |                | <i>Btbd10</i> |                              |              |
| <i>Btbd16</i>  | <i>Btbd16</i> | <i>Btbd16</i>  |               |                              |              |
| <i>Btbd18</i>  | <i>Btbd18</i> |                | <i>Btbd18</i> |                              |              |
| <i>Btbd19</i>  |               | <i>Btbd19</i>  |               |                              |              |
| <i>Btbd3</i>   | <i>Btbd3</i>  |                |               |                              |              |
| <i>Btd</i>     |               |                | <i>Btd</i>    |                              |              |
| <i>Btf3</i>    | <i>Btf3</i>   | <i>Btf3</i>    | <i>Btf3</i>   |                              |              |
| <i>Btf3l4</i>  | <i>Btf3l4</i> | <i>Btf3l4</i>  | <i>Btf3l4</i> |                              |              |
| <i>Btg1</i>    |               | <i>Btg1</i>    |               |                              |              |
| <i>Btg2</i>    |               |                | <i>Btg2</i>   |                              | <i>Btg2</i>  |

Suppl. Table 1  
(21/234)

|                      | CHIP-Seq hits        |                      |                      | Unique hits with interactors |     |
|----------------------|----------------------|----------------------|----------------------|------------------------------|-----|
|                      | unstimulated         | Ac                   | LPS                  | Ac                           | LPS |
| <i>Btg3</i>          |                      | <i>Btg3</i>          |                      |                              |     |
| <i>Btla</i>          |                      | <i>Btla</i>          |                      |                              |     |
| <i>Btn2a2</i>        | <i>Btn2a2</i>        |                      |                      |                              |     |
| <i>Btnl10</i>        |                      | <i>Btnl10</i>        |                      |                              |     |
| <i>Btnl5-ps</i>      | <i>Btnl5-ps</i>      | <i>Btnl5-ps</i>      | <i>Btnl5-ps</i>      |                              |     |
| <i>Btrc</i>          |                      | <i>Btrc</i>          | <i>Btrc</i>          |                              |     |
| <i>Bub1</i>          | <i>Bub1</i>          | <i>Bub1</i>          |                      |                              |     |
| <i>Bub1b</i>         |                      | <i>Bub1b</i>         |                      |                              |     |
| <i>Bud13</i>         |                      | <i>Bud13</i>         | <i>Bud13</i>         |                              |     |
| <i>Bud31</i>         |                      | <i>Bud31</i>         |                      |                              |     |
| <i>Bves</i>          |                      | <i>Bves</i>          | <i>Bves</i>          |                              |     |
| <i>Bysl</i>          | <i>Bysl</i>          |                      |                      |                              |     |
| <i>Bzw1</i>          |                      | <i>Bzw1</i>          |                      |                              |     |
| <i>Bzw2</i>          | <i>Bzw2</i>          | <i>Bzw2</i>          | <i>Bzw2</i>          |                              |     |
| <i>C030006K11Rik</i> |                      | <i>C030006K11Rik</i> |                      |                              |     |
| <i>C030013C21Rik</i> |                      |                      | <i>C030013C21Rik</i> |                              |     |
| <i>C030018K13Rik</i> |                      | <i>C030018K13Rik</i> | <i>C030018K13Rik</i> |                              |     |
| <i>C030034I22Rik</i> |                      |                      | <i>C030034I22Rik</i> |                              |     |
| <i>C030037D09Rik</i> |                      |                      | <i>C030037D09Rik</i> |                              |     |
| <i>C130026I21Rik</i> | <i>C130026I21Rik</i> |                      |                      |                              |     |
| <i>C130026L21Rik</i> |                      |                      | <i>C130026L21Rik</i> |                              |     |
| <i>C130030K03Rik</i> |                      | <i>C130030K03Rik</i> |                      |                              |     |
| <i>C130036L24Rik</i> |                      |                      | <i>C130036L24Rik</i> |                              |     |
| <i>C130060C02Rik</i> |                      |                      | <i>C130060C02Rik</i> |                              |     |
| <i>C130060K24Rik</i> | <i>C130060K24Rik</i> | <i>C130060K24Rik</i> |                      |                              |     |
| <i>C130074G19Rik</i> |                      | <i>C130074G19Rik</i> |                      |                              |     |
| <i>C130079G13Rik</i> | <i>C130079G13Rik</i> |                      |                      |                              |     |
| <i>C1d</i>           |                      | <i>C1d</i>           |                      |                              |     |
| <i>C1galt1</i>       | <i>C1galt1</i>       | <i>C1galt1</i>       |                      |                              |     |
| <i>C1qa</i>          | <i>C1qa</i>          | <i>C1qa</i>          |                      |                              |     |
| <i>C1qbp</i>         |                      | <i>C1qbp</i>         |                      | <i>C1qbp</i>                 |     |
| <i>C1ql2</i>         |                      |                      | <i>C1ql2</i>         |                              |     |
| <i>C1qtnf6</i>       |                      | <i>C1qtnf6</i>       |                      |                              |     |
| <i>C1rl</i>          |                      |                      | <i>C1rl</i>          |                              |     |
| <i>C1s1</i>          |                      |                      | <i>C1s1</i>          |                              |     |
| <i>C1s2</i>          |                      | <i>C1s2</i>          |                      |                              |     |
| <i>C2</i>            |                      | <i>C2</i>            |                      |                              |     |
| <i>C230037L18Rik</i> |                      |                      | <i>C230037L18Rik</i> |                              |     |
| <i>C230091D08Rik</i> | <i>C230091D08Rik</i> |                      |                      |                              |     |
| <i>C2cd4a</i>        |                      | <i>C2cd4a</i>        | <i>C2cd4a</i>        |                              |     |
| <i>C2cd4b</i>        |                      |                      | <i>C2cd4b</i>        |                              |     |
| <i>C2cd5</i>         |                      | <i>C2cd5</i>         | <i>C2cd5</i>         |                              |     |
| <i>C330006A16Rik</i> | <i>C330006A16Rik</i> |                      |                      |                              |     |
| <i>C330007P06Rik</i> |                      |                      | <i>C330007P06Rik</i> | <i>C330007P06Rik</i>         |     |
| <i>C330013E15Rik</i> |                      |                      | <i>C330013E15Rik</i> |                              |     |
| <i>C330018D20Rik</i> | <i>C330018D20Rik</i> |                      |                      |                              |     |
| <i>C330021F23Rik</i> |                      |                      | <i>C330021F23Rik</i> |                              |     |
| <i>C330024D21Rik</i> |                      |                      | <i>C330024D21Rik</i> |                              |     |
| <i>C330027C09Rik</i> |                      |                      | <i>C330027C09Rik</i> |                              |     |

Suppl. Table 1  
(22/234)

|                      | ChIP-Seq hits |               |               | Unique hits with interactors |         |
|----------------------|---------------|---------------|---------------|------------------------------|---------|
|                      | unstimulated  | Ac            | LPS           | Ac                           | LPS     |
| <i>C3ar1</i>         | C3ar1         |               |               |                              |         |
| <i>C430002N11Rik</i> | C430002N11Rik | C430002N11Rik |               |                              |         |
| <i>C4a</i>           |               | C4a           |               |                              |         |
| <i>C4b</i>           |               |               | C4b           |                              |         |
| <i>C4bp-ps1</i>      | C4bp-ps1      | C4bp-ps1      |               |                              |         |
| <i>C530044C16Rik</i> |               | C530044C16Rik |               |                              |         |
| <i>C5ar1</i>         |               |               | C5ar1         |                              |         |
| <i>C6</i>            |               | C6            |               |                              |         |
| <i>C730002L08Rik</i> |               |               | C730002L08Rik |                              |         |
| <i>C77080</i>        |               | C77080        | C77080        |                              |         |
| <i>C77370</i>        | C77370        |               |               |                              |         |
| <i>C78339</i>        |               | C78339        |               |                              |         |
| <i>C86187</i>        |               |               | C86187        |                              |         |
| <i>C86695</i>        | C86695        |               |               |                              |         |
| <i>C87198</i>        |               | C87198        |               |                              |         |
| <i>C87414</i>        |               |               | C87414        |                              |         |
| <i>C87436</i>        | C87436        |               | C87436        |                              |         |
| <i>C8b</i>           | C8b           |               |               |                              |         |
| <i>C920006O11Rik</i> |               | C920006O11Rik |               |                              |         |
| <i>C920009B18Rik</i> | C920009B18Rik | C920009B18Rik |               |                              |         |
| <i>C920025E04Rik</i> |               | C920025E04Rik |               |                              |         |
| <i>Cab39l</i>        |               | Cab39l        |               |                              |         |
| <i>Cabin1</i>        |               | Cabin1        |               |                              |         |
| <i>Cables1</i>       |               |               | Cables1       |                              | Cables1 |
| <i>Cabs1</i>         |               | Cabs1         |               |                              |         |
| <i>Cabyr</i>         |               | Cabyr         |               |                              |         |
| <i>Cacfd1</i>        |               | Cacfd1        |               |                              |         |
| <i>Cacna1a</i>       | Cacna1a       | Cacna1a       |               |                              |         |
| <i>Cacna1b</i>       | Cacna1b       | Cacna1b       | Cacna1b       |                              |         |
| <i>Cacna1c</i>       |               | Cacna1c       | Cacna1c       |                              |         |
| <i>Cacna1d</i>       |               |               | Cacna1d       |                              |         |
| <i>Cacna1f</i>       | Cacna1f       | Cacna1f       |               |                              |         |
| <i>Cacna1i</i>       |               | Cacna1i       |               |                              |         |
| <i>Cacna1s</i>       |               | Cacna1s       |               |                              |         |
| <i>Cacna2d3</i>      |               | Cacna2d3      |               |                              |         |
| <i>Cacnb1</i>        |               | Cacnb1        |               |                              |         |
| <i>Cacnb2</i>        |               | Cacnb2        | Cacnb2        |                              |         |
| <i>Cacnb3</i>        |               | Cacnb3        |               |                              |         |
| <i>Cacnb4</i>        |               | Cacnb4        | Cacnb4        |                              |         |
| <i>Cacng1</i>        |               |               | Cacng1        |                              |         |
| <i>Cacng6</i>        |               | Cacng6        |               |                              |         |
| <i>Cacng8</i>        |               | Cacng8        | Cacng8        |                              |         |
| <i>Cacul1</i>        |               | Cacul1        | Cacul1        |                              |         |
| <i>Cad</i>           | Cad           | Cad           |               |                              |         |
| <i>Cadps2</i>        |               | Cadps2        |               |                              |         |
| <i>Cage1</i>         | Cage1         | Cage1         |               |                              |         |
| <i>Calca</i>         |               |               | Calca         |                              |         |
| <i>Calcb</i>         | Calcb         |               |               |                              |         |
| <i>Calcoco1</i>      |               |               | Calcoco1      |                              |         |

Suppl. Table 1  
(23/234)

|                 | CHIP-Seq hits |          |          | Unique hits with interactors |       |
|-----------------|---------------|----------|----------|------------------------------|-------|
|                 | unstimulated  | Ac       | LPS      | Ac                           | LPS   |
| <i>Calcoco2</i> |               | Calcoco2 | Calcoco2 |                              |       |
| <i>Calhm1</i>   |               | Calhm1   |          |                              |       |
| <i>Calm1</i>    |               | Calm1    |          |                              |       |
| <i>Calm3</i>    |               | Calm3    |          |                              |       |
| <i>Calm4</i>    |               |          | Calm4    |                              |       |
| <i>Calm5</i>    | Calm5         |          | Calm5    |                              |       |
| <i>Calml4</i>   |               | Calml4   |          |                              |       |
| <i>Calr</i>     |               | Calr     | Calr     |                              |       |
| <i>Calr3</i>    |               | Calr3    | Calr3    |                              |       |
| <i>Calr4</i>    |               | Calr4    | Calr4    |                              |       |
| <i>Caly</i>     |               | Caly     |          |                              |       |
| <i>Camk1d</i>   | Camk1d        | Camk1d   | Camk1d   |                              |       |
| <i>Camk1g</i>   |               | Camk1g   |          |                              |       |
| <i>Camk2d</i>   | Camk2d        |          |          |                              |       |
| <i>Camk2g</i>   |               |          | Camk2g   |                              |       |
| <i>Camk2n2</i>  | Camk2n2       |          |          |                              |       |
| <i>Camkk2</i>   | Camkk2        |          |          |                              |       |
| <i>Caml</i>     |               | Caml     |          |                              |       |
| <i>Camsap1</i>  |               | Camsap1  | Camsap1  |                              |       |
| <i>Camsap3</i>  |               |          | Camsap3  |                              |       |
| <i>Camta1</i>   |               | Camta1   |          | Camta1                       |       |
| <i>Camta2</i>   |               | Camta2   |          | Camta2                       |       |
| <i>Cand1</i>    | Cand1         | Cand1    |          |                              |       |
| <i>Cap2</i>     |               |          | Cap2     |                              | Cap2  |
| <i>Capn10</i>   |               |          | Capn10   |                              |       |
| <i>Capn12</i>   | Capn12        |          | Capn12   |                              |       |
| <i>Capn2</i>    | Capn2         | Capn2    |          |                              |       |
| <i>Capn6</i>    | Capn6         | Capn6    |          |                              |       |
| <i>Capn8</i>    |               |          | Capn8    |                              |       |
| <i>Capns1</i>   |               |          | Capns1   |                              |       |
| <i>Caprin1</i>  | Caprin1       | Caprin1  |          |                              |       |
| <i>Caprin2</i>  |               | Caprin2  |          |                              |       |
| <i>Caps2</i>    | Caps2         |          |          |                              |       |
| <i>Capsl</i>    |               | Capsl    |          |                              |       |
| <i>Capza1</i>   |               | Capza1   | Capza1   |                              |       |
| <i>Capzb</i>    |               |          | Capzb    |                              |       |
| <i>Car10</i>    |               | Car10    | Car10    |                              |       |
| <i>Car11</i>    | Car11         | Car11    | Car11    |                              |       |
| <i>Car12</i>    |               | Car12    |          |                              |       |
| <i>Car13</i>    |               | Car13    |          |                              |       |
| <i>Car2</i>     | Car2          |          |          |                              |       |
| <i>Car3</i>     |               | Car3     |          |                              |       |
| <i>Car4</i>     |               | Car4     | Car4     |                              |       |
| <i>Car5a</i>    |               |          | Car5a    |                              | Car5a |
| <i>Car5b</i>    | Car5b         |          |          |                              |       |
| <i>Car7</i>     |               |          | Car7     |                              |       |
| <i>Car8</i>     |               |          | Car8     |                              | Car8  |
| <i>Card10</i>   |               |          | Card10   |                              |       |
| <i>Card14</i>   |               |          | Card14   |                              |       |

Suppl. Table 1  
(24/234)

|                 | CHIP-Seq hits |          |          | Unique hits with interactors |       |
|-----------------|---------------|----------|----------|------------------------------|-------|
|                 | unstimulated  | Ac       | LPS      | Ac                           | LPS   |
| <i>Card6</i>    | Card6         |          |          |                              |       |
| <i>Card9</i>    | Card9         |          |          |                              |       |
| <i>Carf</i>     |               | Carf     | Carf     |                              |       |
| <i>Carhsp1</i>  |               | Carhsp1  |          |                              |       |
| <i>Carkd</i>    |               | Carkd    | Carkd    |                              |       |
| <i>Cars</i>     |               | Cars     | Cars     |                              |       |
| <i>Cars2</i>    |               | Cars2    |          |                              |       |
| <i>Casc3</i>    |               | Casc3    | Casc3    |                              |       |
| <i>Casc4</i>    |               |          | Casc4    |                              | Casc4 |
| <i>Casc5</i>    | Casc5         | Casc5    |          |                              |       |
| <i>Casp1</i>    | Casp1         | Casp1    | Casp1    |                              |       |
| <i>Casp4</i>    |               | Casp4    |          | Casp4                        |       |
| <i>Casp6</i>    | Casp6         |          |          |                              |       |
| <i>Casp8ap2</i> | Casp8ap2      | Casp8ap2 | Casp8ap2 |                              |       |
| <i>Casr</i>     |               | Casr     |          |                              |       |
| <i>Cast</i>     |               |          | Cast     |                              |       |
| <i>Cat</i>      | Cat           | Cat      | Cat      |                              |       |
| <i>Catip</i>    |               |          | Catip    |                              |       |
| <i>Catsper1</i> |               | Catsper1 |          |                              |       |
| <i>Catsper2</i> |               | Catsper2 |          |                              |       |
| <i>Cav1</i>     |               | Cav1     |          | Cav1                         |       |
| <i>Cav2</i>     |               |          | Cav2     |                              | Cav2  |
| <i>Cbfa2t2</i>  | Cbfa2t2       |          | Cbfa2t2  |                              |       |
| <i>Cbfb</i>     |               |          | Cbfb     |                              |       |
| <i>Cblb</i>     | Cblb          |          |          |                              |       |
| <i>Cblc</i>     | Cblc          |          | Cblc     |                              |       |
| <i>Cbll1</i>    |               | Cbll1    |          |                              |       |
| <i>Cbln2</i>    | Cbln2         |          | Cbln2    |                              |       |
| <i>Cbr2</i>     |               |          | Cbr2     |                              |       |
| <i>Cbr4</i>     | Cbr4          |          | Cbr4     |                              |       |
| <i>Cbwd1</i>    | Cbwd1         | Cbwd1    | Cbwd1    |                              |       |
| <i>Cbx1</i>     | Cbx1          | Cbx1     | Cbx1     |                              |       |
| <i>Cbx3</i>     |               | Cbx3     |          |                              |       |
| <i>Cbx5</i>     |               |          | Cbx5     |                              | Cbx5  |
| <i>Cbx6</i>     |               |          | Cbx6     |                              |       |
| <i>Cbx7</i>     |               | Cbx7     |          | Cbx7                         |       |
| <i>Cby1</i>     |               |          | Cby1     |                              |       |
| <i>Cc2d1b</i>   |               |          | Cc2d1b   |                              |       |
| <i>Ccar1</i>    |               | Ccar1    |          |                              |       |
| <i>Ccbl1</i>    |               | Ccbl1    | Ccbl1    |                              |       |
| <i>Ccbl2</i>    |               | Ccbl2    |          |                              |       |
| <i>Ccdc101</i>  |               |          | Ccdc101  |                              |       |
| <i>Ccdc107</i>  |               |          | Ccdc107  |                              |       |
| <i>Ccdc108</i>  |               | Ccdc108  |          |                              |       |
| <i>Ccdc110</i>  | Ccdc110       |          |          |                              |       |
| <i>Ccdc112</i>  |               | Ccdc112  |          |                              |       |
| <i>Ccdc113</i>  |               | Ccdc113  |          |                              |       |
| <i>Ccdc114</i>  |               | Ccdc114  |          |                              |       |
| <i>Ccdc115</i>  | Ccdc115       | Ccdc115  | Ccdc115  |                              |       |



Suppl. Table 1  
(25/234)

|                 | CHIP-Seq hits  |                 |                | Unique hits with interactors |                |
|-----------------|----------------|-----------------|----------------|------------------------------|----------------|
|                 | unstimulated   | Ac              | LPS            | Ac                           | LPS            |
| <i>Ccdc116</i>  |                | <i>Ccdc116</i>  |                |                              |                |
| <i>Ccdc121</i>  | <i>Ccdc121</i> |                 |                |                              |                |
| <i>Ccdc122</i>  |                |                 | <i>Ccdc122</i> |                              |                |
| <i>Ccdc126</i>  |                |                 | <i>Ccdc126</i> |                              |                |
| <i>Ccdc127</i>  |                |                 | <i>Ccdc127</i> |                              | <i>Ccdc127</i> |
| <i>Ccdc130</i>  | <i>Ccdc130</i> |                 | <i>Ccdc130</i> |                              |                |
| <i>Ccdc138</i>  | <i>Ccdc138</i> |                 | <i>Ccdc138</i> |                              |                |
| <i>Ccdc144b</i> |                | <i>Ccdc144b</i> |                |                              |                |
| <i>Ccdc146</i>  | <i>Ccdc146</i> |                 |                |                              |                |
| <i>Ccdc148</i>  |                | <i>Ccdc148</i>  |                | <i>Ccdc148</i>               |                |
| <i>Ccdc149</i>  |                | <i>Ccdc149</i>  | <i>Ccdc149</i> |                              |                |
| <i>Ccdc154</i>  | <i>Ccdc154</i> |                 | <i>Ccdc154</i> |                              |                |
| <i>Ccdc155</i>  |                | <i>Ccdc155</i>  | <i>Ccdc155</i> |                              |                |
| <i>Ccdc157</i>  |                | <i>Ccdc157</i>  |                | <i>Ccdc157</i>               |                |
| <i>Ccdc162</i>  |                | <i>Ccdc162</i>  | <i>Ccdc162</i> |                              |                |
| <i>Ccdc166</i>  |                | <i>Ccdc166</i>  | <i>Ccdc166</i> |                              |                |
| <i>Ccdc167</i>  |                |                 | <i>Ccdc167</i> |                              | <i>Ccdc167</i> |
| <i>Ccdc17</i>   |                | <i>Ccdc17</i>   | <i>Ccdc17</i>  |                              |                |
| <i>Ccdc171</i>  |                | <i>Ccdc171</i>  |                |                              |                |
| <i>Ccdc172</i>  | <i>Ccdc172</i> |                 |                |                              |                |
| <i>Ccdc173</i>  |                | <i>Ccdc173</i>  | <i>Ccdc173</i> |                              |                |
| <i>Ccdc176</i>  | <i>Ccdc176</i> | <i>Ccdc176</i>  | <i>Ccdc176</i> |                              |                |
| <i>Ccdc177</i>  |                | <i>Ccdc177</i>  |                |                              |                |
| <i>Ccdc178</i>  | <i>Ccdc178</i> |                 |                |                              |                |
| <i>Ccdc180</i>  | <i>Ccdc180</i> | <i>Ccdc180</i>  | <i>Ccdc180</i> |                              |                |
| <i>Ccdc184</i>  |                |                 | <i>Ccdc184</i> |                              |                |
| <i>Ccdc22</i>   | <i>Ccdc22</i>  |                 |                |                              |                |
| <i>Ccdc23</i>   |                | <i>Ccdc23</i>   |                |                              |                |
| <i>Ccdc24</i>   |                | <i>Ccdc24</i>   |                |                              |                |
| <i>Ccdc25</i>   | <i>Ccdc25</i>  |                 | <i>Ccdc25</i>  |                              |                |
| <i>Ccdc30</i>   |                | <i>Ccdc30</i>   |                |                              |                |
| <i>Ccdc34</i>   |                |                 | <i>Ccdc34</i>  |                              |                |
| <i>Ccdc40</i>   | <i>Ccdc40</i>  |                 |                |                              |                |
| <i>Ccdc42</i>   |                | <i>Ccdc42</i>   | <i>Ccdc42</i>  |                              |                |
| <i>Ccdc50</i>   |                |                 | <i>Ccdc50</i>  |                              |                |
| <i>Ccdc53</i>   |                | <i>Ccdc53</i>   |                |                              |                |
| <i>Ccdc54</i>   |                | <i>Ccdc54</i>   |                |                              |                |
| <i>Ccdc57</i>   |                | <i>Ccdc57</i>   | <i>Ccdc57</i>  |                              |                |
| <i>Ccdc6</i>    |                |                 | <i>Ccdc6</i>   |                              |                |
| <i>Ccdc60</i>   |                | <i>Ccdc60</i>   |                |                              |                |
| <i>Ccdc62</i>   |                |                 | <i>Ccdc62</i>  |                              |                |
| <i>Ccdc63</i>   | <i>Ccdc63</i>  |                 |                |                              |                |
| <i>Ccdc64b</i>  |                |                 | <i>Ccdc64b</i> |                              |                |
| <i>Ccdc65</i>   |                |                 | <i>Ccdc65</i>  |                              |                |
| <i>Ccdc70</i>   |                | <i>Ccdc70</i>   |                |                              |                |
| <i>Ccdc71</i>   |                |                 | <i>Ccdc71</i>  |                              |                |
| <i>Ccdc71l</i>  |                |                 | <i>Ccdc71l</i> |                              |                |
| <i>Ccdc73</i>   |                |                 | <i>Ccdc73</i>  |                              |                |
| <i>Ccdc74a</i>  |                |                 | <i>Ccdc74a</i> |                              |                |

Suppl. Table 1  
(26/234)

|                | ChIP-Seq hits  |                |                | Unique hits with interactors |               |
|----------------|----------------|----------------|----------------|------------------------------|---------------|
|                | unstimulated   | Ac             | LPS            | Ac                           | LPS           |
| <i>Ccdc77</i>  |                | <i>Ccdc77</i>  | <i>Ccdc77</i>  |                              |               |
| <i>Ccdc7a</i>  |                | <i>Ccdc7a</i>  |                |                              |               |
| <i>Ccdc8</i>   |                |                | <i>Ccdc8</i>   |                              |               |
| <i>Ccdc80</i>  | <i>Ccdc80</i>  |                | <i>Ccdc80</i>  |                              |               |
| <i>Ccdc83</i>  | <i>Ccdc83</i>  |                | <i>Ccdc83</i>  |                              |               |
| <i>Ccdc84</i>  | <i>Ccdc84</i>  |                | <i>Ccdc84</i>  |                              |               |
| <i>Ccdc85a</i> |                | <i>Ccdc85a</i> |                | <i>Ccdc85a</i>               |               |
| <i>Ccdc85b</i> | <i>Ccdc85b</i> | <i>Ccdc85b</i> |                |                              |               |
| <i>Ccdc88a</i> | <i>Ccdc88a</i> |                |                |                              |               |
| <i>Ccdc88b</i> |                | <i>Ccdc88b</i> |                |                              |               |
| <i>Ccdc9</i>   |                | <i>Ccdc9</i>   | <i>Ccdc9</i>   |                              |               |
| <i>Ccdc91</i>  |                | <i>Ccdc91</i>  |                |                              |               |
| <i>Ccdc93</i>  |                |                | <i>Ccdc93</i>  |                              |               |
| <i>Ccdc94</i>  | <i>Ccdc94</i>  | <i>Ccdc94</i>  | <i>Ccdc94</i>  |                              |               |
| <i>Cckbr</i>   | <i>Cckbr</i>   |                |                |                              |               |
| <i>Ccl12</i>   | <i>Ccl12</i>   |                |                |                              |               |
| <i>Ccl17</i>   |                | <i>Ccl17</i>   |                |                              |               |
| <i>Ccl19</i>   |                |                | <i>Ccl19</i>   |                              |               |
| <i>Ccl2</i>    |                | <i>Ccl2</i>    |                | <i>Ccl2</i>                  |               |
| <i>Ccl25</i>   | <i>Ccl25</i>   |                | <i>Ccl25</i>   |                              |               |
| <i>Ccl27b</i>  |                |                | <i>Ccl27b</i>  |                              |               |
| <i>Ccl28</i>   |                |                | <i>Ccl28</i>   |                              | <i>Ccl28</i>  |
| <i>Ccl6</i>    |                |                | <i>Ccl6</i>    |                              |               |
| <i>Ccl7</i>    |                |                | <i>Ccl7</i>    |                              |               |
| <i>Ccm2</i>    |                |                | <i>Ccm2</i>    |                              |               |
| <i>Ccna2</i>   |                |                | <i>Ccna2</i>   |                              | <i>Ccna2</i>  |
| <i>Ccnb1</i>   |                | <i>Ccnb1</i>   | <i>Ccnb1</i>   |                              |               |
| <i>Ccnc</i>    |                |                | <i>Ccnc</i>    |                              | <i>Ccnc</i>   |
| <i>Ccnd1</i>   |                | <i>Ccnd1</i>   |                | <i>Ccnd1</i>                 |               |
| <i>Ccng2</i>   |                |                | <i>Ccng2</i>   |                              |               |
| <i>Ccnh</i>    |                | <i>Ccnh</i>    |                |                              |               |
| <i>Ccni</i>    |                | <i>Ccni</i>    |                |                              |               |
| <i>Ccnj</i>    |                |                | <i>Ccnj</i>    |                              |               |
| <i>Ccnl2</i>   |                |                | <i>Ccnl2</i>   |                              |               |
| <i>Ccno</i>    |                |                | <i>Ccno</i>    |                              |               |
| <i>Ccnt1</i>   | <i>Ccnt1</i>   |                |                |                              |               |
| <i>Ccnt2</i>   |                | <i>Ccnt2</i>   |                | <i>Ccnt2</i>                 |               |
| <i>Ccnyl1</i>  |                |                | <i>Ccnyl1</i>  |                              |               |
| <i>Ccp110</i>  |                | <i>Ccp110</i>  |                |                              |               |
| <i>Ccpg1</i>   |                |                | <i>Ccpg1</i>   |                              | <i>Ccpg1</i>  |
| <i>Ccpg1os</i> |                |                | <i>Ccpg1os</i> |                              |               |
| <i>Ccr10</i>   |                |                | <i>Ccr10</i>   |                              |               |
| <i>Ccr2</i>    |                |                | <i>Ccr2</i>    |                              | <i>Ccr2</i>   |
| <i>Ccr4</i>    |                |                | <i>Ccr4</i>    |                              |               |
| <i>Ccr5</i>    |                | <i>Ccr5</i>    |                |                              |               |
| <i>Ccr6</i>    |                |                | <i>Ccr6</i>    |                              |               |
| <i>Ccr7</i>    |                | <i>Ccr7</i>    |                |                              |               |
| <i>Ccrn4l</i>  |                |                | <i>Ccrn4l</i>  |                              | <i>Ccrn4l</i> |
| <i>Ccsap</i>   | <i>Ccsap</i>   |                |                |                              |               |

Suppl. Table 1  
(27/234)

|                | ChIP-Seq hits |                |                | Unique hits with interactors |              |
|----------------|---------------|----------------|----------------|------------------------------|--------------|
|                | unstimulated  | Ac             | LPS            | Ac                           | LPS          |
| <i>Ccser1</i>  |               | <i>Ccser1</i>  |                |                              |              |
| <i>Cct5</i>    |               |                | <i>Cct5</i>    |                              |              |
| <i>Cct6a</i>   |               | <i>Cct6a</i>   | <i>Cct6a</i>   |                              |              |
| <i>Cct6b</i>   |               | <i>Cct6b</i>   |                |                              |              |
| <i>Cct7</i>    |               | <i>Cct7</i>    |                |                              |              |
| <i>Ccz1</i>    |               | <i>Ccz1</i>    | <i>Ccz1</i>    |                              |              |
| <i>Cd109</i>   | <i>Cd109</i>  |                | <i>Cd109</i>   |                              |              |
| <i>Cd14</i>    |               | <i>Cd14</i>    |                |                              |              |
| <i>Cd160</i>   |               | <i>Cd160</i>   |                |                              |              |
| <i>Cd163</i>   |               |                | <i>Cd163</i>   |                              |              |
| <i>Cd164</i>   |               |                | <i>Cd164</i>   |                              | <i>Cd164</i> |
| <i>Cd177</i>   | <i>Cd177</i>  |                |                |                              |              |
| <i>Cd180</i>   |               | <i>Cd180</i>   | <i>Cd180</i>   |                              |              |
| <i>Cd19</i>    |               | <i>Cd19</i>    |                |                              |              |
| <i>Cd200</i>   | <i>Cd200</i>  |                | <i>Cd200</i>   |                              |              |
| <i>Cd200r1</i> |               | <i>Cd200r1</i> | <i>Cd200r1</i> |                              |              |
| <i>Cd200r2</i> |               |                | <i>Cd200r2</i> |                              |              |
| <i>Cd209g</i>  |               |                | <i>Cd209g</i>  |                              |              |
| <i>Cd226</i>   |               | <i>Cd226</i>   |                |                              |              |
| <i>Cd244</i>   |               | <i>Cd244</i>   |                | <i>Cd244</i>                 |              |
| <i>Cd248</i>   |               |                | <i>Cd248</i>   |                              |              |
| <i>Cd24a</i>   |               |                | <i>Cd24a</i>   |                              |              |
| <i>Cd274</i>   |               |                | <i>Cd274</i>   |                              |              |
| <i>Cd2ap</i>   | <i>Cd2ap</i>  | <i>Cd2ap</i>   | <i>Cd2ap</i>   |                              |              |
| <i>Cd300a</i>  | <i>Cd300a</i> | <i>Cd300a</i>  |                |                              |              |
| <i>Cd300c</i>  |               | <i>Cd300c</i>  |                |                              |              |
| <i>Cd300e</i>  |               | <i>Cd300e</i>  |                |                              |              |
| <i>Cd300lb</i> |               | <i>Cd300lb</i> |                |                              |              |
| <i>Cd300lf</i> |               | <i>Cd300lf</i> |                |                              |              |
| <i>Cd300lg</i> |               | <i>Cd300lg</i> |                |                              |              |
| <i>Cd300lh</i> |               | <i>Cd300lh</i> | <i>Cd300lh</i> |                              |              |
| <i>Cd302</i>   |               | <i>Cd302</i>   |                |                              |              |
| <i>Cd320</i>   |               | <i>Cd320</i>   | <i>Cd320</i>   |                              |              |
| <i>Cd37</i>    |               | <i>Cd37</i>    |                |                              |              |
| <i>Cd38</i>    |               |                | <i>Cd38</i>    |                              |              |
| <i>Cd3g</i>    |               |                | <i>Cd3g</i>    |                              |              |
| <i>Cd4</i>     |               | <i>Cd4</i>     |                | <i>Cd4</i>                   |              |
| <i>Cd40</i>    |               | <i>Cd40</i>    |                | <i>Cd40</i>                  |              |
| <i>Cd44</i>    | <i>Cd44</i>   |                | <i>Cd44</i>    |                              |              |
| <i>Cd47</i>    | <i>Cd47</i>   |                |                |                              |              |
| <i>Cd5</i>     |               | <i>Cd5</i>     |                |                              |              |
| <i>Cd53</i>    | <i>Cd53</i>   | <i>Cd53</i>    | <i>Cd53</i>    |                              |              |
| <i>Cd59b</i>   |               |                | <i>Cd59b</i>   |                              |              |
| <i>Cd5l</i>    |               |                | <i>Cd5l</i>    |                              |              |
| <i>Cd6</i>     |               | <i>Cd6</i>     |                |                              |              |
| <i>Cd63</i>    |               | <i>Cd63</i>    | <i>Cd63</i>    |                              |              |
| <i>Cd7</i>     | <i>Cd7</i>    | <i>Cd7</i>     | <i>Cd7</i>     |                              |              |
| <i>Cd72</i>    |               | <i>Cd72</i>    | <i>Cd72</i>    |                              |              |
| <i>Cd74</i>    | <i>Cd74</i>   | <i>Cd74</i>    |                |                              |              |

Suppl. Table 1  
(28/234)

|                 | CHIP-Seq hits |          |        | Unique hits with interactors |       |
|-----------------|---------------|----------|--------|------------------------------|-------|
|                 | unstimulated  | Ac       | LPS    | Ac                           | LPS   |
| <i>Cd79a</i>    |               | Cd79a    |        | Cd79a                        |       |
| <i>Cd80</i>     |               | Cd80     |        |                              |       |
| <i>Cd81</i>     |               |          | Cd81   |                              |       |
| <i>Cd9</i>      |               | Cd9      |        |                              |       |
| <i>Cd99l2</i>   | Cd99l2        | Cd99l2   |        |                              |       |
| <i>Cdadac1</i>  |               | Cdadac1  |        |                              |       |
| <i>Cdan1</i>    |               | Cdan1    |        |                              |       |
| <i>Cdc123</i>   |               |          | Cdc123 |                              |       |
| <i>Cdc14b</i>   | Cdc14b        | Cdc14b   | Cdc14b |                              |       |
| <i>Cdc20</i>    | Cdc20         | Cdc20    | Cdc20  |                              |       |
| <i>Cdc20b</i>   |               |          | Cdc20b |                              |       |
| <i>Cdc25a</i>   | Cdc25a        | Cdc25a   | Cdc25a |                              |       |
| <i>Cdc25c</i>   |               |          | Cdc25c |                              |       |
| <i>Cdc34</i>    |               | Cdc34    | Cdc34  |                              |       |
| <i>Cdc37</i>    | Cdc37         |          |        |                              |       |
| <i>Cdc40</i>    | Cdc40         | Cdc40    | Cdc40  |                              |       |
| <i>Cdc42</i>    |               | Cdc42    |        | Cdc42                        |       |
| <i>Cdc42bpa</i> |               | Cdc42bpa |        |                              |       |
| <i>Cdc42bpb</i> |               | Cdc42bpb |        |                              |       |
| <i>Cdc42ep2</i> |               | Cdc42ep2 |        |                              |       |
| <i>Cdc42ep4</i> |               | Cdc42ep4 |        |                              |       |
| <i>Cdc42ep5</i> | Cdc42ep5      |          |        |                              |       |
| <i>Cdc42se1</i> | Cdc42se1      |          |        |                              |       |
| <i>Cdc45</i>    |               | Cdc45    | Cdc45  |                              |       |
| <i>Cdc5l</i>    |               | Cdc5l    |        |                              |       |
| <i>Cdc6</i>     |               |          | Cdc6   |                              |       |
| <i>Cdc73</i>    |               |          | Cdc73  |                              |       |
| <i>Cdca5</i>    |               | Cdca5    | Cdca5  |                              |       |
| <i>Cdca7</i>    |               |          | Cdca7  |                              |       |
| <i>Cdca7l</i>   | Cdca7l        |          |        |                              |       |
| <i>Cdca8</i>    | Cdca8         | Cdca8    | Cdca8  |                              |       |
| <i>Cdcp1</i>    |               | Cdcp1    |        |                              |       |
| <i>Cdcp2</i>    |               | Cdcp2    |        |                              |       |
| <i>Cdh1</i>     |               | Cdh1     |        | Cdh1                         |       |
| <i>Cdh12</i>    |               |          | Cdh12  |                              | Cdh12 |
| <i>Cdh15</i>    | Cdh15         |          |        |                              |       |
| <i>Cdh16</i>    | Cdh16         | Cdh16    | Cdh16  |                              |       |
| <i>Cdh18</i>    |               | Cdh18    |        |                              |       |
| <i>Cdh23</i>    |               | Cdh23    |        |                              |       |
| <i>Cdh26</i>    | Cdh26         |          | Cdh26  |                              |       |
| <i>Cdh3</i>     | Cdh3          |          |        |                              |       |
| <i>Cdh6</i>     | Cdh6          |          |        |                              |       |
| <i>Cdh7</i>     |               |          | Cdh7   |                              | Cdh7  |
| <i>Cdh8</i>     | Cdh8          |          | Cdh8   |                              |       |
| <i>Cdipt</i>    |               | Cdipt    |        |                              |       |
| <i>Cdk10</i>    | Cdk10         | Cdk10    |        |                              |       |
| <i>Cdk13</i>    |               | Cdk13    |        |                              |       |
| <i>Cdk16</i>    |               | Cdk16    |        | Cdk16                        |       |
| <i>Cdk18</i>    |               | Cdk18    |        |                              |       |

Suppl. Table 1  
(29/234)

|                 | ChIP-Seq hits |          |          | Unique hits with interactors |       |
|-----------------|---------------|----------|----------|------------------------------|-------|
|                 | unstimulated  | Ac       | LPS      | Ac                           | LPS   |
| <i>Cdk19</i>    | Cdk19         | Cdk19    | Cdk19    |                              |       |
| <i>Cdk2</i>     |               |          | Cdk2     |                              | Cdk2  |
| <i>Cdk20</i>    |               | Cdk20    |          |                              |       |
| <i>Cdk2ap1</i>  |               |          | Cdk2ap1  |                              |       |
| <i>Cdk4</i>     |               | Cdk4     |          |                              |       |
| <i>Cdk5</i>     |               | Cdk5     |          | Cdk5                         |       |
| <i>Cdk5r1</i>   |               | Cdk5r1   | Cdk5r1   |                              |       |
| <i>Cdk5rap1</i> |               | Cdk5rap1 | Cdk5rap1 |                              |       |
| <i>Cdk5rap3</i> |               | Cdk5rap3 | Cdk5rap3 |                              |       |
| <i>Cdk6</i>     |               |          | Cdk6     |                              |       |
| <i>Cdk9</i>     |               |          | Cdk9     |                              | Cdk9  |
| <i>Cdkal1</i>   | Cdkal1        |          | Cdkal1   |                              |       |
| <i>Cdkl1</i>    |               |          | Cdkl1    |                              |       |
| <i>Cdkl2</i>    |               | Cdkl2    |          |                              |       |
| <i>Cdkl3</i>    | Cdkl3         |          | Cdkl3    |                              |       |
| <i>Cdkl4</i>    |               | Cdkl4    |          |                              |       |
| <i>Cdkn1b</i>   | Cdkn1b        |          |          |                              |       |
| <i>Cdkn2a</i>   |               | Cdkn2a   |          |                              |       |
| <i>Cdnf</i>     |               | Cdnf     |          | Cdnf                         |       |
| <i>Cdr2l</i>    |               | Cdr2l    |          | Cdr2l                        |       |
| <i>Cdrt4os1</i> |               |          | Cdrt4os1 |                              |       |
| <i>Cds1</i>     |               | Cds1     |          |                              |       |
| <i>Cdt1</i>     | Cdt1          | Cdt1     | Cdt1     |                              |       |
| <i>Cdx1</i>     |               | Cdx1     | Cdx1     |                              |       |
| <i>Cdx2</i>     | Cdx2          |          |          |                              |       |
| <i>Cdx4</i>     | Cdx4          |          |          |                              |       |
| <i>Cdyl</i>     | Cdyl          | Cdyl     | Cdyl     |                              |       |
| <i>Ceacam1</i>  | Ceacam1       |          |          |                              |       |
| <i>Ceacam19</i> |               | Ceacam19 |          |                              |       |
| <i>Ceacam2</i>  |               | Ceacam2  |          |                              |       |
| <i>Ceacam3</i>  |               | Ceacam3  | Ceacam3  |                              |       |
| <i>Ceacam9</i>  |               | Ceacam9  |          |                              |       |
| <i>Cebpa</i>    | Cebpa         | Cebpa    |          |                              |       |
| <i>Cebpg</i>    |               | Cebpg    |          | Cebpg                        |       |
| <i>Cebpz</i>    | Cebpz         |          |          |                              |       |
| <i>Cecr6</i>    |               | Cecr6    |          |                              |       |
| <i>Cela1</i>    | Cela1         |          |          |                              |       |
| <i>Cela3a</i>   |               |          | Cela3a   |                              |       |
| <i>Cela3b</i>   |               | Cela3b   |          |                              |       |
| <i>Celf1</i>    | Celf1         | Celf1    |          |                              |       |
| <i>Celf2</i>    |               | Celf2    |          | Celf2                        |       |
| <i>Celf3</i>    |               |          | Celf3    |                              |       |
| <i>Celf6</i>    |               |          | Celf6    |                              |       |
| <i>Cend1</i>    |               |          | Cend1    |                              | Cend1 |
| <i>Cenpa</i>    |               | Cenpa    | Cenpa    |                              |       |
| <i>Cenpk</i>    | Cenpk         | Cenpk    | Cenpk    |                              |       |
| <i>Cenpl</i>    |               | Cenpl    | Cenpl    |                              |       |
| <i>Cenpm</i>    |               |          | Cenpm    |                              |       |
| <i>Cenpn</i>    |               |          | Cenpn    |                              |       |

Suppl. Table 1  
(30/234)

|                 | CHIP-Seq hits |          |         | Unique hits with interactors |        |
|-----------------|---------------|----------|---------|------------------------------|--------|
|                 | unstimulated  | Ac       | LPS     | Ac                           | LPS    |
| <i>Cenpp</i>    | Cenpp         |          |         |                              |        |
| <i>Cenpu</i>    |               | Cenpu    |         |                              |        |
| <i>Cep104</i>   | Cep104        |          | Cep104  |                              |        |
| <i>Cep120</i>   |               | Cep120   | Cep120  |                              |        |
| <i>Cep128</i>   |               | Cep128   |         |                              |        |
| <i>Cep131</i>   |               |          | Cep131  |                              |        |
| <i>Cep152</i>   |               |          | Cep152  |                              |        |
| <i>Cep170</i>   |               |          | Cep170  |                              | Cep170 |
| <i>Cep192</i>   |               |          | Cep192  |                              |        |
| <i>Cep250</i>   |               |          | Cep250  |                              |        |
| <i>Cep290</i>   |               | Cep290   |         |                              |        |
| <i>Cep350</i>   |               | Cep350   |         |                              |        |
| <i>Cep41</i>    |               | Cep41    |         |                              |        |
| <i>Cep57</i>    |               |          | Cep57   |                              | Cep57  |
| <i>Cep57l1</i>  | Cep57l1       | Cep57l1  | Cep57l1 |                              |        |
| <i>Cep63</i>    |               | Cep63    |         |                              |        |
| <i>Cep68</i>    |               | Cep68    |         |                              |        |
| <i>Cep70</i>    |               | Cep70    |         |                              |        |
| <i>Cep83os</i>  | Cep83os       |          |         |                              |        |
| <i>Cep89</i>    |               | Cep89    |         |                              |        |
| <i>Cep95</i>    |               | Cep95    | Cep95   |                              |        |
| <i>Cer1</i>     |               |          | Cer1    |                              |        |
| <i>Cers2</i>    |               |          | Cers2   |                              |        |
| <i>Cers3</i>    |               | Cers3    |         |                              |        |
| <i>Cers4</i>    |               | Cers4    |         |                              |        |
| <i>Ces1c</i>    |               | Ces1c    |         |                              |        |
| <i>Ces1e</i>    |               |          | Ces1e   |                              |        |
| <i>Ces2c</i>    |               | Ces2c    |         | Ces2c                        |        |
| <i>Ces2d-ps</i> |               | Ces2d-ps |         |                              |        |
| <i>Ces2f</i>    |               | Ces2f    |         |                              |        |
| <i>Ces3a</i>    |               | Ces3a    |         |                              |        |
| <i>Ces3b</i>    |               |          | Ces3b   |                              |        |
| <i>Ces4a</i>    |               |          | Ces4a   |                              |        |
| <i>Ces5a</i>    |               |          | Ces5a   |                              |        |
| <i>Cetn4</i>    |               | Cetn4    |         |                              |        |
| <i>Cfap126</i>  |               | Cfap126  |         |                              |        |
| <i>Cfap20</i>   |               | Cfap20   | Cfap20  |                              |        |
| <i>Cfap53</i>   | Cfap53        | Cfap53   | Cfap53  |                              |        |
| <i>Cfap57</i>   |               | Cfap57   |         |                              |        |
| <i>Cfap58</i>   |               | Cfap58   |         |                              |        |
| <i>Cfap61</i>   |               |          | Cfap61  |                              |        |
| <i>Cfap97</i>   |               | Cfap97   |         | Cfap97                       |        |
| <i>Cfb</i>      |               | Cfb      |         |                              |        |
| <i>Cfdp1</i>    |               | Cfdp1    | Cfdp1   |                              |        |
| <i>Cfh</i>      |               | Cfh      |         |                              |        |
| <i>Cfhr1</i>    |               | Cfhr1    |         |                              |        |
| <i>Cfi</i>      |               | Cfi      | Cfi     |                              |        |
| <i>Cfl1</i>     |               |          | Cfl1    |                              |        |
| <i>Cflar</i>    |               | Cflar    |         | Cflar                        |        |

Suppl. Table 1  
(31/234)

|                  | CHIP-Seq hits |                |                  | Unique hits with interactors |     |
|------------------|---------------|----------------|------------------|------------------------------|-----|
|                  | unstimulated  | Ac             | LPS              | Ac                           | LPS |
| <i>Cfp</i>       |               | <i>Cfp</i>     | <i>Cfp</i>       |                              |     |
| <i>Cggbp1</i>    |               | <i>Cggbp1</i>  |                  |                              |     |
| <i>Cgn</i>       | <i>Cgn</i>    | <i>Cgn</i>     | <i>Cgn</i>       |                              |     |
| <i>Cgref1</i>    |               | <i>Cgref1</i>  | <i>Cgref1</i>    |                              |     |
| <i>Cgrrf1</i>    | <i>Cgrrf1</i> |                |                  |                              |     |
| <i>Ch25h</i>     |               | <i>Ch25h</i>   |                  |                              |     |
| <i>Chac2</i>     |               |                | <i>Chac2</i>     |                              |     |
| <i>Chadl</i>     | <i>Chadl</i>  |                |                  |                              |     |
| <i>Champ1</i>    |               | <i>Champ1</i>  | <i>Champ1</i>    |                              |     |
| <i>Chat</i>      |               | <i>Chat</i>    |                  |                              |     |
| <i>Chchd3</i>    |               |                | <i>Chchd3</i>    |                              |     |
| <i>Chchd4</i>    |               | <i>Chchd4</i>  |                  |                              |     |
| <i>Chchd6</i>    |               | <i>Chchd6</i>  | <i>Chchd6</i>    |                              |     |
| <i>Chchd7</i>    | <i>Chchd7</i> | <i>Chchd7</i>  | <i>Chchd7</i>    |                              |     |
| <i>Chd1l</i>     |               |                | <i>Chd1l</i>     |                              |     |
| <i>Chd3</i>      | <i>Chd3</i>   |                | <i>Chd3</i>      |                              |     |
| <i>Chd3os</i>    |               |                | <i>Chd3os</i>    |                              |     |
| <i>Chd4</i>      |               | <i>Chd4</i>    | <i>Chd4</i>      |                              |     |
| <i>Chd5</i>      |               | <i>Chd5</i>    |                  |                              |     |
| <i>Chd6</i>      |               |                | <i>Chd6</i>      |                              |     |
| <i>Chd8</i>      |               | <i>Chd8</i>    | <i>Chd8</i>      |                              |     |
| <i>Chd9</i>      |               | <i>Chd9</i>    |                  |                              |     |
| <i>Chdh</i>      |               | <i>Chdh</i>    |                  |                              |     |
| <i>Chek1</i>     | <i>Chek1</i>  | <i>Chek1</i>   | <i>Chek1</i>     |                              |     |
| <i>Chfr</i>      |               |                | <i>Chfr</i>      |                              |     |
| <i>Chic2</i>     |               |                | <i>Chic2</i>     |                              |     |
| <i>Chid1</i>     |               | <i>Chid1</i>   |                  |                              |     |
| <i>Chil1</i>     |               |                | <i>Chil1</i>     |                              |     |
| <i>Chil4</i>     |               | <i>Chil4</i>   |                  |                              |     |
| <i>Chka</i>      |               | <i>Chka</i>    |                  | <i>Chka</i>                  |     |
| <i>Chkb</i>      |               |                | <i>Chkb</i>      |                              |     |
| <i>ChkbCpt1b</i> |               |                | <i>ChkbCpt1b</i> |                              |     |
| <i>Chm</i>       |               | <i>Chm</i>     |                  | <i>Chm</i>                   |     |
| <i>Chmp4b</i>    |               | <i>Chmp4b</i>  | <i>Chmp4b</i>    |                              |     |
| <i>Chmp4c</i>    | <i>Chmp4c</i> |                |                  |                              |     |
| <i>Chmp5</i>     |               | <i>Chmp5</i>   |                  | <i>Chmp5</i>                 |     |
| <i>Chn1</i>      | <i>Chn1</i>   |                | <i>Chn1</i>      |                              |     |
| <i>Chn1os3</i>   |               | <i>Chn1os3</i> |                  |                              |     |
| <i>Chn2</i>      |               | <i>Chn2</i>    |                  |                              |     |
| <i>Chodl</i>     |               |                | <i>Chodl</i>     |                              |     |
| <i>Chp1</i>      |               | <i>Chp1</i>    |                  |                              |     |
| <i>Chpf</i>      | <i>Chpf</i>   |                | <i>Chpf</i>      |                              |     |
| <i>Chpt1</i>     |               | <i>Chpt1</i>   |                  |                              |     |
| <i>Chrac1</i>    | <i>Chrac1</i> |                |                  |                              |     |
| <i>Chrdl2</i>    | <i>Chrdl2</i> |                |                  |                              |     |
| <i>Chrm2</i>     | <i>Chrm2</i>  |                |                  |                              |     |
| <i>Chrm4</i>     |               | <i>Chrm4</i>   |                  |                              |     |
| <i>Chrna10</i>   |               | <i>Chrna10</i> | <i>Chrna10</i>   |                              |     |
| <i>Chrna3</i>    |               | <i>Chrna3</i>  |                  |                              |     |

Suppl. Table 1  
(32/234)

|                | CHIP-Seq hits |         |         | Unique hits with interactors |       |
|----------------|---------------|---------|---------|------------------------------|-------|
|                | unstimulated  | Ac      | LPS     | Ac                           | LPS   |
| <i>Chrna7</i>  | Chrna7        |         |         |                              |       |
| <i>Chst1</i>   | Chst1         |         |         |                              |       |
| <i>Chst10</i>  |               | Chst10  |         |                              |       |
| <i>Chst12</i>  |               |         | Chst12  |                              |       |
| <i>Chst15</i>  |               | Chst15  | Chst15  |                              |       |
| <i>Chst3</i>   |               |         | Chst3   |                              |       |
| <i>Chst4</i>   |               | Chst4   |         |                              |       |
| <i>Chst8</i>   |               | Chst8   |         |                              |       |
| <i>Chsy1</i>   | Chsy1         |         | Chsy1   |                              |       |
| <i>Chsy3</i>   | Chsy3         |         |         |                              |       |
| <i>Chtop</i>   | Chtop         | Chtop   | Chtop   |                              |       |
| <i>Chuk</i>    |               |         | Chuk    |                              |       |
| <i>Ciao1</i>   |               | Ciao1   |         |                              |       |
| <i>Cib2</i>    |               | Cib2    | Cib2    |                              |       |
| <i>Cic</i>     |               | Cic     |         |                              |       |
| <i>Cideb</i>   |               | Cideb   |         |                              |       |
| <i>Cidec</i>   |               |         | Cidec   |                              |       |
| <i>Ciita</i>   |               |         | Ciita   |                              | Ciita |
| <i>Cinp</i>    | Cinp          | Cinp    | Cinp    |                              |       |
| <i>Cipc</i>    |               | Cipc    | Cipc    |                              |       |
| <i>Cir1</i>    |               | Cir1    |         |                              |       |
| <i>Cirbp</i>   | Cirbp         | Cirbp   | Cirbp   |                              |       |
| <i>Cirh1a</i>  | Cirh1a        |         |         |                              |       |
| <i>Cisd1</i>   |               | Cisd1   |         |                              |       |
| <i>Cisd2</i>   |               | Cisd2   | Cisd2   |                              |       |
| <i>Cisd3</i>   |               |         | Cisd3   |                              |       |
| <i>Cish</i>    | Cish          | Cish    |         |                              |       |
| <i>Cited4</i>  | Cited4        | Cited4  |         |                              |       |
| <i>Ciz1</i>    |               |         | Ciz1    |                              |       |
| <i>Ckap2</i>   |               | Ckap2   |         |                              |       |
| <i>Ckap5</i>   | Ckap5         |         | Ckap5   |                              |       |
| <i>Cklf</i>    | Cklf          | Cklf    | Cklf    |                              |       |
| <i>Cks1b</i>   | Cks1b         | Cks1b   | Cks1b   |                              |       |
| <i>Cks1brt</i> | Cks1brt       |         |         |                              |       |
| <i>Cks2</i>    | Cks2          | Cks2    | Cks2    |                              |       |
| <i>Clasp2</i>  |               |         | Clasp2  |                              |       |
| <i>Clca1</i>   |               | Clca1   |         |                              |       |
| <i>Clca3a1</i> |               | Clca3a1 | Clca3a1 |                              |       |
| <i>Clca3a2</i> | Clca3a2       |         | Clca3a2 |                              |       |
| <i>Clca3b</i>  |               |         | Clca3b  |                              |       |
| <i>Clcc1</i>   |               |         | Clcc1   |                              |       |
| <i>Clcf1</i>   |               | Clcf1   | Clcf1   |                              |       |
| <i>Clcn3</i>   |               | Clcn3   | Clcn3   |                              |       |
| <i>Clcn6</i>   |               |         | Clcn6   |                              |       |
| <i>Clcn7</i>   |               |         | Clcn7   |                              |       |
| <i>Clcnka</i>  |               | Clcnka  | Clcnka  |                              |       |
| <i>Clcnkb</i>  |               | Clcnkb  |         |                              |       |
| <i>Cldn10</i>  |               |         | Cldn10  |                              |       |
| <i>Cldn13</i>  |               |         | Cldn13  |                              |       |



Suppl. Table 1  
(33/234)

|                  | ChIP-Seq hits  |                |                  | Unique hits with interactors |     |
|------------------|----------------|----------------|------------------|------------------------------|-----|
|                  | unstimulated   | Ac             | LPS              | Ac                           | LPS |
| <i>Cldn15</i>    |                | <i>Cldn15</i>  |                  |                              |     |
| <i>Cldn16</i>    |                |                | <i>Cldn16</i>    |                              |     |
| <i>Cldn18</i>    |                |                | <i>Cldn18</i>    |                              |     |
| <i>Cldn20</i>    | <i>Cldn20</i>  |                |                  |                              |     |
| <i>Cldn22</i>    |                | <i>Cldn22</i>  |                  |                              |     |
| <i>Cldn23</i>    | <i>Cldn23</i>  | <i>Cldn23</i>  | <i>Cldn23</i>    |                              |     |
| <i>Cldn24</i>    |                | <i>Cldn24</i>  |                  |                              |     |
| <i>Cldn34b4</i>  |                |                | <i>Cldn34b4</i>  |                              |     |
| <i>Cldn34d</i>   |                | <i>Cldn34d</i> |                  |                              |     |
| <i>Cldn34-ps</i> |                |                | <i>Cldn34-ps</i> |                              |     |
| <i>Cldn6</i>     | <i>Cldn6</i>   |                | <i>Cldn6</i>     |                              |     |
| <i>Cldn8</i>     |                | <i>Cldn8</i>   |                  |                              |     |
| <i>Cldnd1</i>    |                | <i>Cldnd1</i>  |                  |                              |     |
| <i>Clec12a</i>   |                | <i>Clec12a</i> | <i>Clec12a</i>   |                              |     |
| <i>Clec12b</i>   | <i>Clec12b</i> |                |                  |                              |     |
| <i>Clec16a</i>   |                | <i>Clec16a</i> |                  |                              |     |
| <i>Clec18a</i>   | <i>Clec18a</i> |                |                  |                              |     |
| <i>Clec1a</i>    |                | <i>Clec1a</i>  |                  |                              |     |
| <i>Clec2e</i>    | <i>Clec2e</i>  |                | <i>Clec2e</i>    |                              |     |
| <i>Clec2f</i>    |                | <i>Clec2f</i>  |                  |                              |     |
| <i>Clec2g</i>    | <i>Clec2g</i>  | <i>Clec2g</i>  | <i>Clec2g</i>    |                              |     |
| <i>Clec2i</i>    | <i>Clec2i</i>  |                |                  |                              |     |
| <i>Clec2l</i>    |                | <i>Clec2l</i>  |                  |                              |     |
| <i>Clec3a</i>    | <i>Clec3a</i>  |                | <i>Clec3a</i>    |                              |     |
| <i>Clec4a1</i>   |                |                | <i>Clec4a1</i>   |                              |     |
| <i>Clec4a3</i>   | <i>Clec4a3</i> |                |                  |                              |     |
| <i>Clec4a4</i>   |                | <i>Clec4a4</i> | <i>Clec4a4</i>   |                              |     |
| <i>Clec4d</i>    |                | <i>Clec4d</i>  | <i>Clec4d</i>    |                              |     |
| <i>Clec4f</i>    |                | <i>Clec4f</i>  |                  |                              |     |
| <i>Clec4g</i>    |                |                | <i>Clec4g</i>    |                              |     |
| <i>Clec4n</i>    |                | <i>Clec4n</i>  |                  |                              |     |
| <i>Clec7a</i>    |                | <i>Clec7a</i>  |                  |                              |     |
| <i>Clhc1</i>     |                |                | <i>Clhc1</i>     |                              |     |
| <i>Clic3</i>     |                | <i>Clic3</i>   |                  |                              |     |
| <i>Clic4</i>     | <i>Clic4</i>   | <i>Clic4</i>   | <i>Clic4</i>     |                              |     |
| <i>Clic6</i>     |                | <i>Clic6</i>   |                  |                              |     |
| <i>Clip1</i>     | <i>Clip1</i>   |                |                  |                              |     |
| <i>Clk1</i>      | <i>Clk1</i>    |                |                  |                              |     |
| <i>Clk2</i>      | <i>Clk2</i>    | <i>Clk2</i>    | <i>Clk2</i>      |                              |     |
| <i>Clk3</i>      |                |                | <i>Clk3</i>      |                              |     |
| <i>Clk4</i>      | <i>Clk4</i>    |                |                  |                              |     |
| <i>Cln3</i>      |                | <i>Cln3</i>    |                  |                              |     |
| <i>Cln5</i>      |                |                | <i>Cln5</i>      |                              |     |
| <i>Clns1a</i>    |                | <i>Clns1a</i>  |                  | <i>Clns1a</i>                |     |
| <i>Clp1</i>      |                |                | <i>Clp1</i>      |                              |     |
| <i>Clpsl2</i>    |                |                | <i>Clpsl2</i>    |                              |     |
| <i>Clptm1</i>    | <i>Clptm1</i>  | <i>Clptm1</i>  | <i>Clptm1</i>    |                              |     |
| <i>Clrn2</i>     |                |                | <i>Clrn2</i>     |                              |     |
| <i>Clrn3</i>     |                | <i>Clrn3</i>   |                  |                              |     |

Suppl. Table 1  
(34/234)

|                | ChIP-Seq hits |               |                | Unique hits with interactors |              |
|----------------|---------------|---------------|----------------|------------------------------|--------------|
|                | unstimulated  | Ac            | LPS            | Ac                           | LPS          |
| <i>Clstn2</i>  |               |               | <i>Clstn2</i>  |                              |              |
| <i>Cltb</i>    |               |               | <i>Cltb</i>    |                              |              |
| <i>Cluap1</i>  |               | <i>Cluap1</i> |                |                              |              |
| <i>Cluh</i>    |               |               | <i>Cluh</i>    |                              |              |
| <i>Clvs1</i>   | <i>Clvs1</i>  |               |                |                              |              |
| <i>Clybl</i>   |               | <i>Clybl</i>  |                |                              |              |
| <i>Cma2</i>    |               |               | <i>Cma2</i>    |                              |              |
| <i>Cmb1</i>    | <i>Cmb1</i>   | <i>Cmb1</i>   | <i>Cmb1</i>    |                              |              |
| <i>Cmc1</i>    |               | <i>Cmc1</i>   |                |                              |              |
| <i>Cmip</i>    | <i>Cmip</i>   |               |                |                              |              |
| <i>Cmklr1</i>  |               | <i>Cmklr1</i> |                | <i>Cmklr1</i>                |              |
| <i>Cml1</i>    | <i>Cml1</i>   |               |                |                              |              |
| <i>Cml3</i>    | <i>Cml3</i>   |               |                |                              |              |
| <i>Cml5</i>    |               | <i>Cml5</i>   |                |                              |              |
| <i>Cmpk1</i>   | <i>Cmpk1</i>  |               |                |                              |              |
| <i>Cmpk2</i>   | <i>Cmpk2</i>  |               |                |                              |              |
| <i>Cmtm2a</i>  |               |               | <i>Cmtm2a</i>  |                              |              |
| <i>Cmtm7</i>   |               |               | <i>Cmtm7</i>   |                              |              |
| <i>Cmtr1</i>   | <i>Cmtr1</i>  |               | <i>Cmtr1</i>   |                              |              |
| <i>Cmtr2</i>   |               | <i>Cmtr2</i>  |                |                              |              |
| <i>Cmya5</i>   |               | <i>Cmya5</i>  | <i>Cmya5</i>   |                              |              |
| <i>Cnbp</i>    | <i>Cnbp</i>   |               |                |                              |              |
| <i>Cndp1</i>   |               | <i>Cndp1</i>  |                |                              |              |
| <i>Cnep1r1</i> |               |               | <i>Cnep1r1</i> |                              |              |
| <i>Cnfn</i>    |               |               | <i>Cnfn</i>    |                              |              |
| <i>Cnga2</i>   |               | <i>Cnga2</i>  | <i>Cnga2</i>   |                              |              |
| <i>Cnga3</i>   | <i>Cnga3</i>  |               |                |                              |              |
| <i>Cngb1</i>   | <i>Cngb1</i>  |               |                |                              |              |
| <i>Cnih1</i>   |               | <i>Cnih1</i>  |                |                              |              |
| <i>Cnih3</i>   |               | <i>Cnih3</i>  |                | <i>Cnih3</i>                 |              |
| <i>Cnksr1</i>  |               |               | <i>Cnksr1</i>  |                              |              |
| <i>Cnksr3</i>  | <i>Cnksr3</i> |               | <i>Cnksr3</i>  |                              |              |
| <i>Cnn1</i>    |               |               | <i>Cnn1</i>    |                              |              |
| <i>Cnn3</i>    | <i>Cnn3</i>   |               |                |                              |              |
| <i>Cnnm2</i>   |               |               | <i>Cnnm2</i>   |                              |              |
| <i>Cnnm3</i>   |               |               | <i>Cnnm3</i>   |                              | <i>Cnnm3</i> |
| <i>Cnnm4</i>   |               | <i>Cnnm4</i>  | <i>Cnnm4</i>   |                              |              |
| <i>Cnot1</i>   |               |               | <i>Cnot1</i>   |                              | <i>Cnot1</i> |
| <i>Cnot10</i>  |               | <i>Cnot10</i> |                |                              |              |
| <i>Cnot11</i>  | <i>Cnot11</i> |               |                |                              |              |
| <i>Cnot2</i>   |               |               | <i>Cnot2</i>   |                              |              |
| <i>Cnot3</i>   |               | <i>Cnot3</i>  |                |                              |              |
| <i>Cnot4</i>   |               | <i>Cnot4</i>  |                |                              |              |
| <i>Cnot6</i>   |               |               | <i>Cnot6</i>   |                              | <i>Cnot6</i> |
| <i>Cnot6l</i>  | <i>Cnot6l</i> | <i>Cnot6l</i> | <i>Cnot6l</i>  |                              |              |
| <i>Cnot7</i>   |               | <i>Cnot7</i>  |                |                              |              |
| <i>Cnot8</i>   |               | <i>Cnot8</i>  | <i>Cnot8</i>   |                              |              |
| <i>Cnp</i>     | <i>Cnp</i>    |               | <i>Cnp</i>     |                              |              |
| <i>Cnppd1</i>  |               |               | <i>Cnppd1</i>  |                              |              |

Suppl. Table 1  
(35/234)

|                 | ChIP-Seq hits |          |          | Unique hits with interactors |        |
|-----------------|---------------|----------|----------|------------------------------|--------|
|                 | unstimulated  | Ac       | LPS      | Ac                           | LPS    |
| <i>Cnpy2</i>    | Cnpy2         |          |          |                              |        |
| <i>Cnpy3</i>    |               | Cnpy3    |          |                              |        |
| <i>Cnpy4</i>    |               | Cnpy4    |          |                              |        |
| <i>Cnr1</i>     |               |          | Cnr1     |                              | Cnr1   |
| <i>Cntn2</i>    |               |          | Cntn2    |                              | Cntn2  |
| <i>Cntn3</i>    |               |          | Cntn3    |                              | Cntn3  |
| <i>Cntn4</i>    | Cntn4         |          |          |                              |        |
| <i>Cntnap2</i>  |               | Cntnap2  | Cntnap2  |                              |        |
| <i>Cntnap3</i>  |               | Cntnap3  |          |                              |        |
| <i>Cntnap5a</i> | Cntnap5a      |          |          |                              |        |
| <i>Cntnap5b</i> |               |          | Cntnap5b |                              |        |
| <i>Cntrl</i>    |               | Cntrl    |          |                              |        |
| <i>Coa3</i>     |               |          | Coa3     |                              |        |
| <i>Coa4</i>     |               | Coa4     |          |                              |        |
| <i>Coa5</i>     | Coa5          | Coa5     |          |                              |        |
| <i>Coa6</i>     |               | Coa6     |          |                              |        |
| <i>Coa7</i>     |               | Coa7     |          |                              |        |
| <i>Cobll1</i>   |               |          | Cobll1   |                              |        |
| <i>Cog2</i>     |               |          | Cog2     |                              |        |
| <i>Cog3</i>     | Cog3          | Cog3     | Cog3     |                              |        |
| <i>Cog4</i>     |               |          | Cog4     |                              |        |
| <i>Cog5</i>     |               |          | Cog5     |                              |        |
| <i>Cog6</i>     |               |          | Cog6     |                              |        |
| <i>Cog7</i>     |               | Cog7     | Cog7     |                              |        |
| <i>Coil</i>     |               | Coil     | Coil     |                              |        |
| <i>Col10a1</i>  |               |          | Col10a1  |                              |        |
| <i>Col14a1</i>  | Col14a1       | Col14a1  |          |                              |        |
| <i>Col15a1</i>  |               | Col15a1  |          |                              |        |
| <i>Col17a1</i>  |               |          | Col17a1  |                              |        |
| <i>Col18a1</i>  |               | Col18a1  | Col18a1  |                              |        |
| <i>Col19a1</i>  |               | Col19a1  |          |                              |        |
| <i>Col20a1</i>  |               | Col20a1  |          |                              |        |
| <i>Col25a1</i>  |               | Col25a1  |          |                              |        |
| <i>Col26a1</i>  |               | Col26a1  |          |                              |        |
| <i>Col2a1</i>   |               | Col2a1   |          |                              |        |
| <i>Col3a1</i>   |               |          | Col3a1   |                              |        |
| <i>Col4a3bp</i> |               | Col4a3bp |          |                              |        |
| <i>Col4a5</i>   | Col4a5        |          |          |                              |        |
| <i>Col4a6</i>   | Col4a6        |          |          |                              |        |
| <i>Col6a1</i>   |               | Col6a1   |          |                              |        |
| <i>Col6a4</i>   |               | Col6a4   |          |                              |        |
| <i>Col7a1</i>   |               |          | Col7a1   |                              | Col7a1 |
| <i>Col8a2</i>   | Col8a2        |          | Col8a2   |                              |        |
| <i>Colec11</i>  |               | Colec11  |          |                              |        |
| <i>Colec12</i>  |               | Colec12  |          | Colec12                      |        |
| <i>Colq</i>     |               | Colq     |          |                              |        |
| <i>Commd1</i>   |               |          | Commd1   |                              |        |
| <i>Commd10</i>  | Commd10       |          |          |                              |        |
| <i>Commd3</i>   |               |          | Commd3   |                              |        |

Suppl. Table 1  
(36/234)

|                | ChIP-Seq hits |                |               | Unique hits with interactors |               |
|----------------|---------------|----------------|---------------|------------------------------|---------------|
|                | unstimulated  | Ac             | LPS           | Ac                           | LPS           |
| <i>Commd4</i>  |               | <i>Commd4</i>  | <i>Commd4</i> |                              |               |
| <i>Commd7</i>  | <i>Commd7</i> | <i>Commd7</i>  | <i>Commd7</i> |                              |               |
| <i>Commd8</i>  |               |                | <i>Commd8</i> |                              | <i>Commd8</i> |
| <i>Comp</i>    |               | <i>Comp</i>    | <i>Comp</i>   |                              |               |
| <i>Copb1</i>   |               |                | <i>Copb1</i>  |                              |               |
| <i>Copg1</i>   |               | <i>Copg1</i>   |               |                              |               |
| <i>Cops2</i>   |               |                | <i>Cops2</i>  |                              | <i>Cops2</i>  |
| <i>Cops3</i>   |               |                | <i>Cops3</i>  |                              |               |
| <i>Cops6</i>   |               | <i>Cops6</i>   | <i>Cops6</i>  |                              |               |
| <i>Cops7a</i>  |               |                | <i>Cops7a</i> |                              |               |
| <i>Cops7b</i>  |               | <i>Cops7b</i>  | <i>Cops7b</i> |                              |               |
| <i>Cops8</i>   |               |                | <i>Cops8</i>  |                              |               |
| <i>Copz1</i>   |               | <i>Copz1</i>   | <i>Copz1</i>  |                              |               |
| <i>Coq3</i>    |               |                | <i>Coq3</i>   |                              | <i>Coq3</i>   |
| <i>Coq4</i>    | <i>Coq4</i>   |                | <i>Coq4</i>   |                              |               |
| <i>Coq5</i>    | <i>Coq5</i>   | <i>Coq5</i>    | <i>Coq5</i>   |                              |               |
| <i>Coq6</i>    |               | <i>Coq6</i>    |               |                              |               |
| <i>Coq7</i>    | <i>Coq7</i>   | <i>Coq7</i>    | <i>Coq7</i>   |                              |               |
| <i>Coro1a</i>  |               |                | <i>Coro1a</i> |                              |               |
| <i>Coro1c</i>  |               | <i>Coro1c</i>  |               |                              |               |
| <i>Coro2a</i>  |               | <i>Coro2a</i>  |               | <i>Coro2a</i>                |               |
| <i>Coro6</i>   | <i>Coro6</i>  | <i>Coro6</i>   | <i>Coro6</i>  |                              |               |
| <i>Coro7</i>   |               |                | <i>Coro7</i>  |                              |               |
| <i>Cort</i>    | <i>Cort</i>   |                | <i>Cort</i>   |                              |               |
| <i>Cotl1</i>   |               |                | <i>Cotl1</i>  |                              |               |
| <i>Cox14</i>   |               |                | <i>Cox14</i>  |                              |               |
| <i>Cox15</i>   |               | <i>Cox15</i>   |               | <i>Cox15</i>                 |               |
| <i>Cox16</i>   |               | <i>Cox16</i>   | <i>Cox16</i>  |                              |               |
| <i>Cox17</i>   |               | <i>Cox17</i>   |               |                              |               |
| <i>Cox20</i>   |               | <i>Cox20</i>   | <i>Cox20</i>  |                              |               |
| <i>Cox4i1</i>  |               |                | <i>Cox4i1</i> |                              |               |
| <i>Cox4i2</i>  |               | <i>Cox4i2</i>  | <i>Cox4i2</i> |                              |               |
| <i>Cox5a</i>   |               |                | <i>Cox5a</i>  |                              |               |
| <i>Cox5b</i>   |               | <i>Cox5b</i>   |               |                              |               |
| <i>Cox6a1</i>  |               |                | <i>Cox6a1</i> |                              | <i>Cox6a1</i> |
| <i>Cox6a2</i>  |               | <i>Cox6a2</i>  |               |                              |               |
| <i>Cox6c</i>   |               |                | <i>Cox6c</i>  |                              |               |
| <i>Cox7a1</i>  | <i>Cox7a1</i> | <i>Cox7a1</i>  | <i>Cox7a1</i> |                              |               |
| <i>Cox7a2l</i> |               | <i>Cox7a2l</i> |               |                              |               |
| <i>Cox7b</i>   |               |                | <i>Cox7b</i>  |                              |               |
| <i>Cox7b2</i>  |               |                | <i>Cox7b2</i> |                              |               |
| <i>Cox8a</i>   |               |                | <i>Cox8a</i>  |                              |               |
| <i>Cp</i>      |               | <i>Cp</i>      |               |                              |               |
| <i>Cpa1</i>    | <i>Cpa1</i>   |                |               |                              |               |
| <i>Cpa2</i>    |               |                | <i>Cpa2</i>   |                              |               |
| <i>Cpa6</i>    |               | <i>Cpa6</i>    |               |                              |               |
| <i>Cpb2</i>    |               |                | <i>Cpb2</i>   |                              |               |
| <i>Cpd</i>     |               | <i>Cpd</i>     | <i>Cpd</i>    |                              |               |
| <i>Cpeb1</i>   |               | <i>Cpeb1</i>   |               | <i>Cpeb1</i>                 |               |

Suppl. Table 1  
(37/234)

|                 | ChIP-Seq hits |                 |                | Unique hits with interactors |              |
|-----------------|---------------|-----------------|----------------|------------------------------|--------------|
|                 | unstimulated  | Ac              | LPS            | Ac                           | LPS          |
| <i>Cpeb2</i>    |               | <i>Cpeb2</i>    |                | <i>Cpeb2</i>                 |              |
| <i>Cpeb3</i>    |               | <i>Cpeb3</i>    | <i>Cpeb3</i>   |                              |              |
| <i>Cped1</i>    | <i>Cped1</i>  | <i>Cped1</i>    |                |                              |              |
| <i>Cphx1</i>    |               | <i>Cphx1</i>    |                |                              |              |
| <i>Cphx2</i>    |               | <i>Cphx2</i>    |                |                              |              |
| <i>Cpn2</i>     | <i>Cpn2</i>   | <i>Cpn2</i>     | <i>Cpn2</i>    |                              |              |
| <i>Cpne1</i>    | <i>Cpne1</i>  |                 |                |                              |              |
| <i>Cpne6</i>    |               |                 | <i>Cpne6</i>   |                              |              |
| <i>Cpne7</i>    |               | <i>Cpne7</i>    |                |                              |              |
| <i>Cpne8</i>    | <i>Cpne8</i>  |                 | <i>Cpne8</i>   |                              |              |
| <i>Cps1</i>     |               | <i>Cps1</i>     | <i>Cps1</i>    |                              |              |
| <i>Cpsf1</i>    | <i>Cpsf1</i>  |                 |                |                              |              |
| <i>Cpsf2</i>    |               | <i>Cpsf2</i>    | <i>Cpsf2</i>   |                              |              |
| <i>Cpsf3</i>    | <i>Cpsf3</i>  |                 |                |                              |              |
| <i>Cpsf4l</i>   |               |                 | <i>Cpsf4l</i>  |                              |              |
| <i>Cpt1b</i>    |               | <i>Cpt1b</i>    |                |                              |              |
| <i>Cpvl</i>     |               |                 | <i>Cpvl</i>    |                              |              |
| <i>Cpxm2</i>    |               | <i>Cpxm2</i>    |                |                              |              |
| <i>Cr2</i>      |               | <i>Cr2</i>      |                |                              |              |
| <i>Crabp1</i>   |               | <i>Crabp1</i>   |                |                              |              |
| <i>Cracr2b</i>  |               | <i>Cracr2b</i>  |                | <i>Cracr2b</i>               |              |
| <i>Cradd</i>    | <i>Cradd</i>  |                 |                |                              |              |
| <i>Crat</i>     | <i>Crat</i>   | <i>Crat</i>     | <i>Crat</i>    |                              |              |
| <i>Crb3</i>     |               |                 | <i>Crb3</i>    |                              |              |
| <i>Crcp</i>     |               |                 | <i>Crcp</i>    |                              |              |
| <i>Crct1</i>    |               |                 | <i>Crct1</i>   |                              |              |
| <i>Creb1</i>    |               |                 | <i>Creb1</i>   |                              | <i>Creb1</i> |
| <i>Creb3l1</i>  |               |                 | <i>Creb3l1</i> |                              |              |
| <i>Creb3l2</i>  |               | <i>Creb3l2</i>  |                |                              |              |
| <i>Creb3l3</i>  |               | <i>Creb3l3</i>  |                |                              |              |
| <i>Creb5</i>    |               | <i>Creb5</i>    |                | <i>Creb5</i>                 |              |
| <i>Crebrf</i>   |               | <i>Crebrf</i>   |                | <i>Crebrf</i>                |              |
| <i>Crebzf</i>   | <i>Crebzf</i> | <i>Crebzf</i>   | <i>Crebzf</i>  |                              |              |
| <i>Crem</i>     | <i>Crem</i>   |                 |                |                              |              |
| <i>Crh</i>      | <i>Crh</i>    | <i>Crh</i>      |                |                              |              |
| <i>Crhr1</i>    |               | <i>Crhr1</i>    |                |                              |              |
| <i>Crip3</i>    |               | <i>Crip3</i>    |                |                              |              |
| <i>Cript</i>    |               |                 | <i>Cript</i>   |                              |              |
| <i>Crisp2</i>   |               |                 | <i>Crisp2</i>  |                              |              |
| <i>Crispld1</i> |               | <i>Crispld1</i> |                | <i>Crispld1</i>              |              |
| <i>Crk</i>      |               | <i>Crk</i>      | <i>Crk</i>     |                              |              |
| <i>Crkl</i>     |               |                 | <i>Crkl</i>    |                              | <i>Crkl</i>  |
| <i>Crlf1</i>    | <i>Crlf1</i>  |                 |                |                              |              |
| <i>Crls1</i>    |               | <i>Crls1</i>    | <i>Crls1</i>   |                              |              |
| <i>Crmp1</i>    | <i>Crmp1</i>  | <i>Crmp1</i>    | <i>Crmp1</i>   |                              |              |
| <i>Crnde</i>    | <i>Crnde</i>  | <i>Crnde</i>    |                |                              |              |
| <i>Crnkl1</i>   |               |                 | <i>Crnkl1</i>  |                              |              |
| <i>Crnn</i>     |               | <i>Crnn</i>     |                |                              |              |
| <i>Crocc</i>    | <i>Crocc</i>  | <i>Crocc</i>    |                |                              |              |

Suppl. Table 1  
(38/234)

|                | CHIP-Seq hits  |                |                | Unique hits with interactors |                |
|----------------|----------------|----------------|----------------|------------------------------|----------------|
|                | unstimulated   | Ac             | LPS            | Ac                           | LPS            |
| <i>Crot</i>    |                |                | <i>Crot</i>    |                              |                |
| <i>Crtac1</i>  |                | <i>Crtac1</i>  |                |                              |                |
| <i>Crtam</i>   | <i>Crtam</i>   |                |                |                              |                |
| <i>Crtc1</i>   | <i>Crtc1</i>   |                |                |                              |                |
| <i>Crtc2</i>   |                | <i>Crtc2</i>   | <i>Crtc2</i>   |                              |                |
| <i>Crtc3</i>   |                |                | <i>Crtc3</i>   |                              |                |
| <i>Crzos</i>   |                | <i>Crzos</i>   | <i>Crzos</i>   |                              |                |
| <i>Cry1</i>    | <i>Cry1</i>    | <i>Cry1</i>    | <i>Cry1</i>    |                              |                |
| <i>Cry2</i>    |                | <i>Cry2</i>    |                | <i>Cry2</i>                  |                |
| <i>Cryab</i>   |                | <i>Cryab</i>   |                | <i>Cryab</i>                 |                |
| <i>Cryba2</i>  |                |                | <i>Cryba2</i>  |                              |                |
| <i>Cryba4</i>  |                | <i>Cryba4</i>  |                |                              |                |
| <i>Crybb1</i>  |                | <i>Crybb1</i>  |                |                              |                |
| <i>Cryga</i>   | <i>Cryga</i>   |                |                |                              |                |
| <i>Crygb</i>   | <i>Crygb</i>   | <i>Crygb</i>   |                |                              |                |
| <i>Cryge</i>   | <i>Cryge</i>   |                |                |                              |                |
| <i>Crygn</i>   |                |                | <i>Crygn</i>   |                              |                |
| <i>Crygs</i>   |                | <i>Crygs</i>   |                |                              |                |
| <i>Cryl1</i>   | <i>Cryl1</i>   | <i>Cryl1</i>   |                |                              |                |
| <i>Cryz</i>    |                | <i>Cryz</i>    |                |                              |                |
| <i>Cryzl1</i>  |                |                | <i>Cryzl1</i>  |                              |                |
| <i>Csad</i>    | <i>Csad</i>    |                |                |                              |                |
| <i>Csde1</i>   |                |                | <i>Csde1</i>   |                              | <i>Csde1</i>   |
| <i>Cse1l</i>   | <i>Cse1l</i>   | <i>Cse1l</i>   | <i>Cse1l</i>   |                              |                |
| <i>Csf1r</i>   |                | <i>Csf1r</i>   |                | <i>Csf1r</i>                 |                |
| <i>Csf2</i>    | <i>Csf2</i>    | <i>Csf2</i>    |                |                              |                |
| <i>Csf3</i>    |                | <i>Csf3</i>    |                | <i>Csf3</i>                  |                |
| <i>Csl</i>     | <i>Csl</i>     |                |                |                              |                |
| <i>Csmd2</i>   |                |                | <i>Csmd2</i>   |                              |                |
| <i>Csn1s2a</i> |                |                | <i>Csn1s2a</i> |                              |                |
| <i>Csnk1a1</i> |                |                | <i>Csnk1a1</i> |                              | <i>Csnk1a1</i> |
| <i>Csnk1g1</i> |                | <i>Csnk1g1</i> | <i>Csnk1g1</i> |                              |                |
| <i>Csnk1g3</i> | <i>Csnk1g3</i> |                |                |                              |                |
| <i>Csprs</i>   | <i>Csprs</i>   |                |                |                              |                |
| <i>Csrnp1</i>  |                |                | <i>Csrnp1</i>  |                              |                |
| <i>Csrp1</i>   |                | <i>Csrp1</i>   |                |                              |                |
| <i>Csrp2</i>   | <i>Csrp2</i>   | <i>Csrp2</i>   |                |                              |                |
| <i>Csrp2bp</i> |                | <i>Csrp2bp</i> |                | <i>Csrp2bp</i>               |                |
| <i>Csrp3</i>   |                |                | <i>Csrp3</i>   |                              |                |
| <i>Cst10</i>   |                |                | <i>Cst10</i>   |                              |                |
| <i>Cst11</i>   |                | <i>Cst11</i>   |                |                              |                |
| <i>Cst12</i>   |                | <i>Cst12</i>   | <i>Cst12</i>   |                              |                |
| <i>Cst6</i>    |                | <i>Cst6</i>    |                | <i>Cst6</i>                  |                |
| <i>Cst8</i>    |                |                | <i>Cst8</i>    |                              |                |
| <i>Cstad</i>   |                |                | <i>Cstad</i>   |                              |                |
| <i>Cstf2</i>   | <i>Cstf2</i>   | <i>Cstf2</i>   | <i>Cstf2</i>   |                              |                |
| <i>Cstf2t</i>  |                | <i>Cstf2t</i>  |                |                              |                |
| <i>Ctage5</i>  |                |                | <i>Ctage5</i>  |                              | <i>Ctage5</i>  |
| <i>Ctbp1</i>   |                | <i>Ctbp1</i>   |                |                              |                |

Suppl. Table 1  
(39/234)

|                  | CHIP-Seq hits |         |         | Unique hits with interactors |       |
|------------------|---------------|---------|---------|------------------------------|-------|
|                  | unstimulated  | Ac      | LPS     | Ac                           | LPS   |
| <i>Ctbp2</i>     | Ctbp2         |         | Ctbp2   |                              |       |
| <i>Ctbs</i>      |               |         | Ctbs    |                              |       |
| <i>Ctc1</i>      | Ctc1          |         | Ctc1    |                              |       |
| <i>Ctcf</i>      |               |         | Ctcf    |                              | Ctcf  |
| <i>Ctdnep1</i>   |               | Ctdnep1 |         |                              |       |
| <i>Ctdsp2</i>    | Ctdsp2        | Ctdsp2  | Ctdsp2  |                              |       |
| <i>Ctdspl2</i>   | Ctdspl2       |         | Ctdspl2 |                              |       |
| <i>Ctf1</i>      |               | Ctf1    |         |                              |       |
| <i>Ctf2</i>      |               |         | Ctf2    |                              |       |
| <i>Ctgf</i>      |               | Ctgf    |         | Ctgf                         |       |
| <i>Cthrc1</i>    |               |         | Cthrc1  |                              |       |
| <i>Ctif</i>      |               | Ctif    |         | Ctif                         |       |
| <i>Ctla2b</i>    |               |         | Ctla2b  |                              |       |
| <i>Ctnna1</i>    | Ctnna1        |         | Ctnna1  |                              |       |
| <i>Ctnna3</i>    | Ctnna3        | Ctnna3  | Ctnna3  |                              |       |
| <i>Ctnnal1</i>   |               | Ctnnal1 |         |                              |       |
| <i>Ctnnb1</i>    |               | Ctnnb1  |         | Ctnnb1                       |       |
| <i>Ctnnbl1</i>   |               | Ctnnbl1 |         |                              |       |
| <i>Ctnnd1</i>    |               | Ctnnd1  |         | Ctnnd1                       |       |
| <i>Ctns</i>      |               |         | Ctns    |                              |       |
| <i>Ctps</i>      |               | Ctps    |         |                              |       |
| <i>Ctps2</i>     |               |         | Ctps2   |                              | Ctps2 |
| <i>Ctr9</i>      |               | Ctr9    |         |                              |       |
| <i>Cts8</i>      |               | Cts8    |         | Cts8                         |       |
| <i>Cts8-ps</i>   | Cts8-ps       |         |         |                              |       |
| <i>Ctsd</i>      |               | Ctsd    |         |                              |       |
| <i>Ctsf</i>      |               |         | Ctsf    |                              |       |
| <i>Ctsk</i>      | Ctsk          |         |         |                              |       |
| <i>Ctsl</i>      |               |         | Ctsl    |                              |       |
| <i>Ctsll3</i>    |               | Ctsll3  |         |                              |       |
| <i>Ctsm</i>      |               |         | Ctsm    |                              |       |
| <i>Ctso</i>      |               |         | Ctso    |                              |       |
| <i>Ctsq</i>      | Ctsq          |         |         |                              |       |
| <i>Ctsr</i>      |               | Ctsr    |         |                              |       |
| <i>Ctss</i>      |               | Ctss    |         |                              |       |
| <i>Ctsw</i>      |               |         | Ctsw    |                              |       |
| <i>Ctsz</i>      |               |         | Ctsz    |                              |       |
| <i>Cttn</i>      | Cttn          | Cttn    | Cttn    |                              |       |
| <i>Cttnbp2</i>   |               | Cttnbp2 |         |                              |       |
| <i>Cttnbp2nl</i> | Cttnbp2nl     |         |         |                              |       |
| <i>Ctu1</i>      |               |         | Ctu1    |                              |       |
| <i>Ctu2</i>      |               |         | Ctu2    |                              |       |
| <i>Ctxn1</i>     | Ctxn1         |         |         |                              |       |
| <i>Cubn</i>      |               |         | Cubn    |                              |       |
| <i>Cul1</i>      |               | Cul1    | Cul1    |                              |       |
| <i>Cul2</i>      |               |         | Cul2    |                              |       |
| <i>Cul3</i>      | Cul3          |         |         |                              |       |
| <i>Cul4a</i>     |               | Cul4a   | Cul4a   |                              |       |
| <i>Cul7</i>      | Cul7          |         |         |                              |       |

Suppl. Table 1  
(40/234)

|                 | CHIP-Seq hits   |                |                 | Unique hits with interactors |               |
|-----------------|-----------------|----------------|-----------------|------------------------------|---------------|
|                 | unstimulated    | Ac             | LPS             | Ac                           | LPS           |
| <i>Cul9</i>     |                 |                | <i>Cul9</i>     |                              |               |
| <i>Cutal</i>    | <i>Cutal</i>    |                |                 |                              |               |
| <i>Cutc</i>     |                 | <i>Cutc</i>    | <i>Cutc</i>     |                              |               |
| <i>Cux1</i>     | <i>Cux1</i>     |                | <i>Cux1</i>     |                              |               |
| <i>Cwc15</i>    | <i>Cwc15</i>    | <i>Cwc15</i>   | <i>Cwc15</i>    |                              |               |
| <i>Cwc22</i>    | <i>Cwc22</i>    | <i>Cwc22</i>   | <i>Cwc22</i>    |                              |               |
| <i>Cwc27</i>    |                 | <i>Cwc27</i>   |                 |                              |               |
| <i>Cwf19l2</i>  |                 |                | <i>Cwf19l2</i>  |                              |               |
| <i>Cwh43</i>    |                 |                | <i>Cwh43</i>    |                              |               |
| <i>Cx3cr1</i>   | <i>Cx3cr1</i>   |                |                 |                              |               |
| <i>Cxadr</i>    |                 |                | <i>Cxadr</i>    |                              | <i>Cxadr</i>  |
| <i>Cxcl1</i>    |                 | <i>Cxcl1</i>   | <i>Cxcl1</i>    |                              |               |
| <i>Cxcl12</i>   |                 |                | <i>Cxcl12</i>   |                              | <i>Cxcl12</i> |
| <i>Cxcl13</i>   | <i>Cxcl13</i>   |                |                 |                              |               |
| <i>Cxcl15</i>   |                 | <i>Cxcl15</i>  |                 |                              |               |
| <i>Cxcl2</i>    |                 | <i>Cxcl2</i>   | <i>Cxcl2</i>    |                              |               |
| <i>Cxcl9</i>    | <i>Cxcl9</i>    | <i>Cxcl9</i>   | <i>Cxcl9</i>    |                              |               |
| <i>Cxcr2</i>    |                 | <i>Cxcr2</i>   |                 |                              |               |
| <i>Cxcr3</i>    |                 | <i>Cxcr3</i>   |                 |                              |               |
| <i>Cxcr5</i>    |                 | <i>Cxcr5</i>   |                 |                              |               |
| <i>Cxx1a</i>    |                 |                | <i>Cxx1a</i>    |                              |               |
| <i>Cxx1b</i>    |                 | <i>Cxx1b</i>   | <i>Cxx1b</i>    |                              |               |
| <i>Cxxc1</i>    |                 |                | <i>Cxxc1</i>    |                              |               |
| <i>Cxxc4</i>    |                 |                | <i>Cxxc4</i>    |                              |               |
| <i>Cxxc5</i>    |                 | <i>Cxxc5</i>   |                 |                              |               |
| <i>Cyb561</i>   | <i>Cyb561</i>   |                | <i>Cyb561</i>   |                              |               |
| <i>Cyb561a3</i> | <i>Cyb561a3</i> |                |                 |                              |               |
| <i>Cyb561d2</i> | <i>Cyb561d2</i> |                | <i>Cyb561d2</i> |                              |               |
| <i>Cyb5d1</i>   |                 |                | <i>Cyb5d1</i>   |                              |               |
| <i>Cyb5d2</i>   |                 | <i>Cyb5d2</i>  |                 | <i>Cyb5d2</i>                |               |
| <i>Cyb5r3</i>   |                 | <i>Cyb5r3</i>  |                 |                              |               |
| <i>Cyb5rl</i>   |                 |                | <i>Cyb5rl</i>   |                              |               |
| <i>Cybrd1</i>   |                 | <i>Cybrd1</i>  |                 | <i>Cybrd1</i>                |               |
| <i>Cyc1</i>     |                 |                | <i>Cyc1</i>     |                              |               |
| <i>Cyct</i>     |                 |                | <i>Cyct</i>     |                              |               |
| <i>Cyhr1</i>    |                 | <i>Cyhr1</i>   |                 |                              |               |
| <i>Cylc2</i>    |                 |                | <i>Cylc2</i>    |                              |               |
| <i>Cyld</i>     |                 |                | <i>Cyld</i>     |                              | <i>Cyld</i>   |
| <i>Cyp11a1</i>  |                 | <i>Cyp11a1</i> |                 | <i>Cyp11a1</i>               |               |
| <i>Cyp17a1</i>  |                 | <i>Cyp17a1</i> |                 |                              |               |
| <i>Cyp1a2</i>   | <i>Cyp1a2</i>   |                |                 |                              |               |
| <i>Cyp1b1</i>   | <i>Cyp1b1</i>   |                |                 |                              |               |
| <i>Cyp20a1</i>  |                 |                | <i>Cyp20a1</i>  |                              |               |
| <i>Cyp26b1</i>  |                 | <i>Cyp26b1</i> |                 |                              |               |
| <i>Cyp26c1</i>  | <i>Cyp26c1</i>  | <i>Cyp26c1</i> |                 |                              |               |
| <i>Cyp2a12</i>  |                 |                | <i>Cyp2a12</i>  |                              |               |
| <i>Cyp2a5</i>   |                 |                | <i>Cyp2a5</i>   |                              | <i>Cyp2a5</i> |
| <i>Cyp2ab1</i>  |                 | <i>Cyp2ab1</i> |                 |                              |               |
| <i>Cyp2b10</i>  | <i>Cyp2b10</i>  | <i>Cyp2b10</i> | <i>Cyp2b10</i>  |                              |               |



Suppl. Table 1  
(41/234)

|                   | CHIP-Seq hits   |                   |                   | Unique hits with interactors |     |
|-------------------|-----------------|-------------------|-------------------|------------------------------|-----|
|                   | unstimulated    | Ac                | LPS               | Ac                           | LPS |
| <i>Cyp2b19</i>    |                 | <i>Cyp2b19</i>    |                   |                              |     |
| <i>Cyp2c38</i>    |                 | <i>Cyp2c38</i>    |                   |                              |     |
| <i>Cyp2c40</i>    |                 | <i>Cyp2c40</i>    |                   |                              |     |
| <i>Cyp2c55</i>    |                 |                   | <i>Cyp2c55</i>    |                              |     |
| <i>Cyp2c65</i>    | <i>Cyp2c65</i>  | <i>Cyp2c65</i>    | <i>Cyp2c65</i>    |                              |     |
| <i>Cyp2c67</i>    | <i>Cyp2c67</i>  | <i>Cyp2c67</i>    | <i>Cyp2c67</i>    |                              |     |
| <i>Cyp2c68</i>    | <i>Cyp2c68</i>  | <i>Cyp2c68</i>    | <i>Cyp2c68</i>    |                              |     |
| <i>Cyp2c69</i>    |                 | <i>Cyp2c69</i>    | <i>Cyp2c69</i>    |                              |     |
| <i>Cyp2c70</i>    |                 | <i>Cyp2c70</i>    |                   |                              |     |
| <i>Cyp2d11</i>    |                 | <i>Cyp2d11</i>    |                   |                              |     |
| <i>Cyp2d12</i>    |                 | <i>Cyp2d12</i>    | <i>Cyp2d12</i>    |                              |     |
| <i>Cyp2d13</i>    |                 |                   | <i>Cyp2d13</i>    |                              |     |
| <i>Cyp2d22</i>    |                 | <i>Cyp2d22</i>    |                   |                              |     |
| <i>Cyp2d34</i>    |                 | <i>Cyp2d34</i>    |                   |                              |     |
| <i>Cyp2f2</i>     |                 | <i>Cyp2f2</i>     |                   |                              |     |
| <i>Cyp2g1</i>     | <i>Cyp2g1</i>   | <i>Cyp2g1</i>     |                   |                              |     |
| <i>Cyp2j11</i>    | <i>Cyp2j11</i>  | <i>Cyp2j11</i>    | <i>Cyp2j11</i>    |                              |     |
| <i>Cyp2j12</i>    |                 | <i>Cyp2j12</i>    | <i>Cyp2j12</i>    |                              |     |
| <i>Cyp2j5</i>     |                 | <i>Cyp2j5</i>     | <i>Cyp2j5</i>     |                              |     |
| <i>Cyp2j8</i>     |                 | <i>Cyp2j8</i>     | <i>Cyp2j8</i>     |                              |     |
| <i>Cyp2r1</i>     |                 | <i>Cyp2r1</i>     |                   |                              |     |
| <i>Cyp2t4</i>     | <i>Cyp2t4</i>   | <i>Cyp2t4</i>     | <i>Cyp2t4</i>     |                              |     |
| <i>Cyp39a1</i>    |                 | <i>Cyp39a1</i>    | <i>Cyp39a1</i>    |                              |     |
| <i>Cyp3a13</i>    |                 | <i>Cyp3a13</i>    |                   |                              |     |
| <i>Cyp3a44</i>    |                 | <i>Cyp3a44</i>    |                   |                              |     |
| <i>Cyp3a57</i>    |                 |                   | <i>Cyp3a57</i>    |                              |     |
| <i>Cyp4a12a</i>   | <i>Cyp4a12a</i> | <i>Cyp4a12a</i>   | <i>Cyp4a12a</i>   |                              |     |
| <i>Cyp4a29</i>    |                 | <i>Cyp4a29</i>    |                   |                              |     |
| <i>Cyp4a31</i>    |                 | <i>Cyp4a31</i>    |                   |                              |     |
| <i>Cyp4b1</i>     |                 | <i>Cyp4b1</i>     |                   |                              |     |
| <i>Cyp4f13</i>    |                 | <i>Cyp4f13</i>    | <i>Cyp4f13</i>    |                              |     |
| <i>Cyp4f16</i>    | <i>Cyp4f16</i>  |                   | <i>Cyp4f16</i>    |                              |     |
| <i>Cyp4f17</i>    |                 | <i>Cyp4f17</i>    |                   |                              |     |
| <i>Cyp4f40</i>    |                 |                   | <i>Cyp4f40</i>    |                              |     |
| <i>Cyp4f41-ps</i> |                 | <i>Cyp4f41-ps</i> | <i>Cyp4f41-ps</i> |                              |     |
| <i>Cyp7a1</i>     |                 |                   | <i>Cyp7a1</i>     |                              |     |
| <i>Cyp7b1</i>     | <i>Cyp7b1</i>   | <i>Cyp7b1</i>     |                   |                              |     |
| <i>Cyp8b1</i>     |                 |                   | <i>Cyp8b1</i>     |                              |     |
| <i>Cypt10</i>     |                 | <i>Cypt10</i>     |                   |                              |     |
| <i>Cypt2</i>      |                 | <i>Cypt2</i>      |                   |                              |     |
| <i>Cypt3</i>      | <i>Cypt3</i>    |                   |                   |                              |     |
| <i>Cypt4</i>      |                 | <i>Cypt4</i>      |                   |                              |     |
| <i>Cypt9</i>      |                 | <i>Cypt9</i>      |                   |                              |     |
| <i>Cys1</i>       |                 | <i>Cys1</i>       |                   |                              |     |
| <i>Cysltr1</i>    |                 | <i>Cysltr1</i>    |                   | <i>Cysltr1</i>               |     |
| <i>Cystm1</i>     |                 | <i>Cystm1</i>     |                   |                              |     |
| <i>Cyth1</i>      | <i>Cyth1</i>    | <i>Cyth1</i>      |                   |                              |     |
| <i>Cyth2</i>      | <i>Cyth2</i>    |                   | <i>Cyth2</i>      |                              |     |
| <i>Cyth3</i>      |                 | <i>Cyth3</i>      | <i>Cyth3</i>      |                              |     |

Suppl. Table 1  
(42/234)

|                      | ChIP-Seq hits |               |               | Unique hits with interactors |     |
|----------------------|---------------|---------------|---------------|------------------------------|-----|
|                      | unstimulated  | Ac            | LPS           | Ac                           | LPS |
| <i>Cytip</i>         |               | <i>Cytip</i>  |               | <i>Cytip</i>                 |     |
| <i>D030018L15Rik</i> | D030018L15Rik |               | D030018L15Rik |                              |     |
| <i>D030025E07Rik</i> |               | D030025E07Rik |               |                              |     |
| <i>D030028A08Rik</i> |               | D030028A08Rik | D030028A08Rik |                              |     |
| <i>D030056L22Rik</i> |               |               | D030056L22Rik |                              |     |
| <i>D030068K23Rik</i> |               | D030068K23Rik | D030068K23Rik |                              |     |
| <i>D10Wsu102e</i>    |               |               | D10Wsu102e    |                              |     |
| <i>D130017N08Rik</i> |               |               | D130017N08Rik |                              |     |
| <i>D130040H23Rik</i> |               |               | D130040H23Rik |                              |     |
| <i>D130043K22Rik</i> |               | D130043K22Rik |               |                              |     |
| <i>D15Ertd621e</i>   | D15Ertd621e   |               |               |                              |     |
| <i>D16Ertd472e</i>   | D16Ertd472e   |               |               |                              |     |
| <i>D17Wsu92e</i>     |               |               | D17Wsu92e     |                              |     |
| <i>D230030E09Rik</i> |               | D230030E09Rik |               |                              |     |
| <i>D330050G23Rik</i> |               | D330050G23Rik |               |                              |     |
| <i>D3Ertd254e</i>    |               | D3Ertd254e    |               | D3Ertd254e                   |     |
| <i>D430019H16Rik</i> |               | D430019H16Rik |               |                              |     |
| <i>D430042O09Rik</i> | D430042O09Rik |               |               |                              |     |
| <i>D530049I02Rik</i> |               |               | D530049I02Rik |                              |     |
| <i>D5Ertd579e</i>    |               | D5Ertd579e    |               |                              |     |
| <i>D5Ertd605e</i>    |               | D5Ertd605e    |               |                              |     |
| <i>D630010B17Rik</i> |               | D630010B17Rik |               |                              |     |
| <i>D630013N20Rik</i> |               | D630013N20Rik | D630013N20Rik |                              |     |
| <i>D630024D03Rik</i> | D630024D03Rik |               |               |                              |     |
| <i>D630039A03Rik</i> |               | D630039A03Rik |               |                              |     |
| <i>D630045J12Rik</i> | D630045J12Rik |               |               |                              |     |
| <i>D630045M09Rik</i> | D630045M09Rik |               |               |                              |     |
| <i>D730045A05Rik</i> |               | D730045A05Rik |               |                              |     |
| <i>D7Ertd443e</i>    | D7Ertd443e    |               | D7Ertd443e    |                              |     |
| <i>D830026I12Rik</i> | D830026I12Rik | D830026I12Rik | D830026I12Rik |                              |     |
| <i>D830032E09Rik</i> |               |               | D830032E09Rik |                              |     |
| <i>D8Ertd82e</i>     | D8Ertd82e     | D8Ertd82e     | D8Ertd82e     |                              |     |
| <i>D930015E06Rik</i> |               | D930015E06Rik |               |                              |     |
| <i>D930015M05Rik</i> |               |               | D930015M05Rik |                              |     |
| <i>D930016D06Rik</i> | D930016D06Rik |               | D930016D06Rik |                              |     |
| <i>D930032P07Rik</i> |               | D930032P07Rik |               |                              |     |
| <i>D930048N14Rik</i> | D930048N14Rik |               | D930048N14Rik |                              |     |
| <i>Dab1</i>          |               |               | Dab1          |                              |     |
| <i>Dab2</i>          |               |               | Dab2          |                              |     |
| <i>Dab2ip</i>        |               | Dab2ip        | Dab2ip        |                              |     |
| <i>Dach2</i>         |               | Dach2         | Dach2         |                              |     |
| <i>Dact3</i>         |               | Dact3         |               | Dact3                        |     |
| <i>Dad1</i>          |               | Dad1          | Dad1          |                              |     |
| <i>Daf2</i>          |               | Daf2          |               |                              |     |
| <i>Dag1</i>          |               | Dag1          |               | Dag1                         |     |
| <i>Dalir</i>         |               |               | Dalir         |                              |     |
| <i>Dand5</i>         |               |               | Dand5         |                              |     |
| <i>Dao</i>           | Dao           |               |               |                              |     |
| <i>Dap</i>           |               | Dap           | Dap           |                              |     |

Suppl. Table 1  
(43/234)

|                | CHIP-Seq hits |         |         | Unique hits with interactors |     |
|----------------|---------------|---------|---------|------------------------------|-----|
|                | unstimulated  | Ac      | LPS     | Ac                           | LPS |
| <i>Dap3</i>    | Dap3          |         |         |                              |     |
| <i>Dapk1</i>   | Dapk1         | Dapk1   | Dapk1   |                              |     |
| <i>Dars2</i>   |               | Dars2   |         | Dars2                        |     |
| <i>Daw1</i>    |               | Daw1    |         |                              |     |
| <i>Dazap2</i>  | Dazap2        |         |         |                              |     |
| <i>Dbf4</i>    |               | Dbf4    |         |                              |     |
| <i>Dbi</i>     |               |         | Dbi     |                              |     |
| <i>Dbn1</i>    |               |         | Dbn1    |                              |     |
| <i>Dbnddd1</i> | Dbnddd1       | Dbnddd1 | Dbnddd1 |                              |     |
| <i>Dbt</i>     | Dbt           |         |         |                              |     |
| <i>Dbx1</i>    |               | Dbx1    | Dbx1    |                              |     |
| <i>Dbx2</i>    |               | Dbx2    |         |                              |     |
| <i>Dcaf12</i>  | Dcaf12        | Dcaf12  |         |                              |     |
| <i>Dcaf13</i>  |               | Dcaf13  |         |                              |     |
| <i>Dcaf15</i>  |               |         | Dcaf15  |                              |     |
| <i>Dcaf17</i>  |               | Dcaf17  | Dcaf17  |                              |     |
| <i>Dcaf4</i>   |               | Dcaf4   |         |                              |     |
| <i>Dcaf5</i>   | Dcaf5         |         |         |                              |     |
| <i>Dcaf7</i>   |               | Dcaf7   |         |                              |     |
| <i>Dcaf8</i>   | Dcaf8         |         |         |                              |     |
| <i>Dcbld2</i>  |               | Dcbld2  |         |                              |     |
| <i>Dcc</i>     | Dcc           |         |         |                              |     |
| <i>Dcdc2b</i>  |               | Dcdc2b  |         |                              |     |
| <i>Dchs1</i>   |               | Dchs1   |         |                              |     |
| <i>Dclk1</i>   | Dclk1         |         |         |                              |     |
| <i>Dclre1c</i> | Dclre1c       |         |         |                              |     |
| <i>Dcn</i>     |               | Dcn     |         |                              |     |
| <i>Dcp1b</i>   | Dcp1b         |         |         |                              |     |
| <i>Dcp2</i>    |               | Dcp2    |         |                              |     |
| <i>Dctn1</i>   |               | Dctn1   |         |                              |     |
| <i>Dctn3</i>   | Dctn3         |         |         |                              |     |
| <i>Dctn4</i>   |               |         | Dctn4   |                              |     |
| <i>Dctn6</i>   | Dctn6         | Dctn6   | Dctn6   |                              |     |
| <i>Dctpp1</i>  |               |         | Dctpp1  |                              |     |
| <i>Dcun1d1</i> |               |         | Dcun1d1 |                              |     |
| <i>Dcun1d4</i> |               | Dcun1d4 |         |                              |     |
| <i>Dcun1d5</i> | Dcun1d5       |         |         |                              |     |
| <i>Dcxr</i>    | Dcxr          | Dcxr    |         |                              |     |
| <i>Dda1</i>    |               | Dda1    |         |                              |     |
| <i>Ddb1</i>    |               | Ddb1    |         |                              |     |
| <i>Ddc</i>     | Ddc           |         |         |                              |     |
| <i>Ddhd2</i>   |               | Ddhd2   | Ddhd2   |                              |     |
| <i>Ddit3</i>   |               | Ddit3   |         | Ddit3                        |     |
| <i>Ddit4</i>   |               |         | Ddit4   |                              |     |
| <i>Ddo</i>     |               | Ddo     |         |                              |     |
| <i>Ddost</i>   | Ddost         | Ddost   |         |                              |     |
| <i>Ddr2</i>    | Ddr2          | Ddr2    | Ddr2    |                              |     |
| <i>Ddrgk1</i>  |               | Ddrgk1  | Ddrgk1  |                              |     |
| <i>Ddx10</i>   |               | Ddx10   |         |                              |     |

Suppl. Table 1  
(44/234)

|                  | ChIP-Seq hits    |                  |                  | Unique hits with interactors |              |
|------------------|------------------|------------------|------------------|------------------------------|--------------|
|                  | unstimulated     | Ac               | LPS              | Ac                           | LPS          |
| <i>Ddx17</i>     |                  | <i>Ddx17</i>     |                  | <i>Ddx17</i>                 |              |
| <i>Ddx19a</i>    | <i>Ddx19a</i>    | <i>Ddx19a</i>    |                  |                              |              |
| <i>Ddx19b</i>    | <i>Ddx19b</i>    |                  | <i>Ddx19b</i>    |                              |              |
| <i>Ddx20</i>     | <i>Ddx20</i>     | <i>Ddx20</i>     | <i>Ddx20</i>     |                              |              |
| <i>Ddx21</i>     |                  | <i>Ddx21</i>     | <i>Ddx21</i>     |                              |              |
| <i>Ddx23</i>     |                  | <i>Ddx23</i>     |                  |                              |              |
| <i>Ddx24</i>     | <i>Ddx24</i>     |                  |                  |                              |              |
| <i>Ddx25</i>     | <i>Ddx25</i>     | <i>Ddx25</i>     | <i>Ddx25</i>     |                              |              |
| <i>Ddx26b</i>    |                  | <i>Ddx26b</i>    | <i>Ddx26b</i>    |                              |              |
| <i>Ddx27</i>     |                  | <i>Ddx27</i>     | <i>Ddx27</i>     |                              |              |
| <i>Ddx28</i>     |                  | <i>Ddx28</i>     | <i>Ddx28</i>     |                              |              |
| <i>Ddx3x</i>     |                  |                  | <i>Ddx3x</i>     |                              | <i>Ddx3x</i> |
| <i>Ddx3y</i>     | <i>Ddx3y</i>     |                  |                  |                              |              |
| <i>Ddx4</i>      |                  | <i>Ddx4</i>      | <i>Ddx4</i>      |                              |              |
| <i>Ddx42</i>     |                  |                  | <i>Ddx42</i>     |                              |              |
| <i>Ddx46</i>     | <i>Ddx46</i>     | <i>Ddx46</i>     | <i>Ddx46</i>     |                              |              |
| <i>Ddx47</i>     |                  | <i>Ddx47</i>     | <i>Ddx47</i>     |                              |              |
| <i>Ddx49</i>     |                  |                  | <i>Ddx49</i>     |                              |              |
| <i>Ddx5</i>      | <i>Ddx5</i>      |                  | <i>Ddx5</i>      |                              |              |
| <i>Ddx50</i>     |                  | <i>Ddx50</i>     |                  |                              |              |
| <i>Ddx52</i>     |                  |                  | <i>Ddx52</i>     |                              |              |
| <i>Ddx54</i>     | <i>Ddx54</i>     |                  | <i>Ddx54</i>     |                              |              |
| <i>Ddx55</i>     | <i>Ddx55</i>     | <i>Ddx55</i>     | <i>Ddx55</i>     |                              |              |
| <i>Ddx56</i>     |                  |                  | <i>Ddx56</i>     |                              |              |
| <i>Ddx59</i>     | <i>Ddx59</i>     |                  |                  |                              |              |
| <i>Ddx6</i>      |                  | <i>Ddx6</i>      | <i>Ddx6</i>      |                              |              |
| <i>Ddx60</i>     |                  | <i>Ddx60</i>     |                  |                              |              |
| <i>Deaf1</i>     | <i>Deaf1</i>     |                  | <i>Deaf1</i>     |                              |              |
| <i>Dear1</i>     | <i>Dear1</i>     |                  | <i>Dear1</i>     |                              |              |
| <i>Deb1</i>      |                  | <i>Deb1</i>      |                  |                              |              |
| <i>Decr1</i>     | <i>Decr1</i>     | <i>Decr1</i>     |                  |                              |              |
| <i>Dedd</i>      |                  | <i>Dedd</i>      | <i>Dedd</i>      |                              |              |
| <i>Def6</i>      | <i>Def6</i>      |                  |                  |                              |              |
| <i>Def8</i>      | <i>Def8</i>      | <i>Def8</i>      | <i>Def8</i>      |                              |              |
| <i>Defa17</i>    |                  |                  | <i>Defa17</i>    |                              |              |
| <i>Defa23</i>    |                  |                  | <i>Defa23</i>    |                              |              |
| <i>Defa24</i>    |                  |                  | <i>Defa24</i>    |                              |              |
| <i>Defa3</i>     |                  | <i>Defa3</i>     | <i>Defa3</i>     |                              |              |
| <i>Defa5</i>     |                  | <i>Defa5</i>     |                  |                              |              |
| <i>Defa6</i>     |                  |                  | <i>Defa6</i>     |                              |              |
| <i>Defa-ps12</i> | <i>Defa-ps12</i> | <i>Defa-ps12</i> | <i>Defa-ps12</i> |                              |              |
| <i>Defa-rs1</i>  | <i>Defa-rs1</i>  |                  |                  |                              |              |
| <i>Defa-rs7</i>  |                  |                  | <i>Defa-rs7</i>  |                              |              |
| <i>Defb14</i>    | <i>Defb14</i>    |                  |                  |                              |              |
| <i>Defb15</i>    |                  | <i>Defb15</i>    |                  |                              |              |
| <i>Defb19</i>    |                  |                  | <i>Defb19</i>    |                              |              |
| <i>Defb21</i>    |                  | <i>Defb21</i>    |                  | <i>Defb21</i>                |              |
| <i>Defb22</i>    | <i>Defb22</i>    | <i>Defb22</i>    |                  |                              |              |
| <i>Defb23</i>    |                  | <i>Defb23</i>    |                  |                              |              |

Suppl. Table 1  
(45/234)

|                | CHIP-Seq hits  |                |                | Unique hits with interactors |               |
|----------------|----------------|----------------|----------------|------------------------------|---------------|
|                | unstimulated   | Ac             | LPS            | Ac                           | LPS           |
| <i>Defb26</i>  |                | <i>Defb26</i>  | <i>Defb26</i>  |                              |               |
| <i>Defb30</i>  | <i>Defb30</i>  | <i>Defb30</i>  | <i>Defb30</i>  |                              |               |
| <i>Defb39</i>  |                |                | <i>Defb39</i>  |                              |               |
| <i>Defb40</i>  |                | <i>Defb40</i>  | <i>Defb40</i>  |                              |               |
| <i>Defb42</i>  |                | <i>Defb42</i>  | <i>Defb42</i>  |                              |               |
| <i>Defb47</i>  |                | <i>Defb47</i>  |                |                              |               |
| <i>Defb6</i>   |                | <i>Defb6</i>   | <i>Defb6</i>   |                              |               |
| <i>Defb9</i>   |                |                | <i>Defb9</i>   |                              |               |
| <i>Dennd1b</i> | <i>Dennd1b</i> | <i>Dennd1b</i> | <i>Dennd1b</i> |                              |               |
| <i>Dennd2d</i> | <i>Dennd2d</i> |                | <i>Dennd2d</i> |                              |               |
| <i>Dennd3</i>  |                | <i>Dennd3</i>  |                |                              |               |
| <i>Dennd4a</i> |                | <i>Dennd4a</i> |                | <i>Dennd4a</i>               |               |
| <i>Dennd6a</i> | <i>Dennd6a</i> | <i>Dennd6a</i> |                |                              |               |
| <i>Depdc1a</i> | <i>Depdc1a</i> |                |                |                              |               |
| <i>Depdc5</i>  |                |                | <i>Depdc5</i>  |                              | <i>Depdc5</i> |
| <i>Depdc7</i>  |                | <i>Depdc7</i>  |                |                              |               |
| <i>Derl1</i>   |                | <i>Derl1</i>   | <i>Derl1</i>   |                              |               |
| <i>Derl2</i>   |                |                | <i>Derl2</i>   |                              | <i>Derl2</i>  |
| <i>Des</i>     |                | <i>Des</i>     |                | <i>Des</i>                   |               |
| <i>Desi1</i>   |                |                | <i>Desi1</i>   |                              |               |
| <i>Desi2</i>   | <i>Desi2</i>   |                |                |                              |               |
| <i>Dexi</i>    |                | <i>Dexi</i>    |                |                              |               |
| <i>Dffa</i>    | <i>Dffa</i>    | <i>Dffa</i>    | <i>Dffa</i>    |                              |               |
| <i>Dffb</i>    | <i>Dffb</i>    | <i>Dffb</i>    | <i>Dffb</i>    |                              |               |
| <i>Dfnb59</i>  |                | <i>Dfnb59</i>  |                |                              |               |
| <i>Dgat2l6</i> |                | <i>Dgat2l6</i> | <i>Dgat2l6</i> |                              |               |
| <i>Dgcr14</i>  |                | <i>Dgcr14</i>  | <i>Dgcr14</i>  |                              |               |
| <i>Dgcr2</i>   | <i>Dgcr2</i>   |                |                |                              |               |
| <i>Dgcr6</i>   | <i>Dgcr6</i>   | <i>Dgcr6</i>   | <i>Dgcr6</i>   |                              |               |
| <i>Dgka</i>    |                |                | <i>Dgka</i>    |                              |               |
| <i>Dgkb</i>    | <i>Dgkb</i>    | <i>Dgkb</i>    | <i>Dgkb</i>    |                              |               |
| <i>Dgkh</i>    |                | <i>Dgkh</i>    |                |                              |               |
| <i>Dgkk</i>    |                | <i>Dgkk</i>    |                |                              |               |
| <i>Dgkq</i>    |                |                | <i>Dgkq</i>    |                              |               |
| <i>Dgkz</i>    |                |                | <i>Dgkz</i>    |                              |               |
| <i>Dhdds</i>   |                |                | <i>Dhdds</i>   |                              |               |
| <i>Dhfr</i>    | <i>Dhfr</i>    |                |                |                              |               |
| <i>Dhh</i>     |                |                | <i>Dhh</i>     |                              | <i>Dhh</i>    |
| <i>Dhps</i>    |                | <i>Dhps</i>    |                |                              |               |
| <i>Dhrs13</i>  |                |                | <i>Dhrs13</i>  |                              |               |
| <i>Dhrs2</i>   |                |                | <i>Dhrs2</i>   |                              |               |
| <i>Dhrs3</i>   |                |                | <i>Dhrs3</i>   |                              |               |
| <i>Dhrs4</i>   |                |                | <i>Dhrs4</i>   |                              |               |
| <i>Dhrs7</i>   | <i>Dhrs7</i>   |                |                |                              |               |
| <i>Dhrs7b</i>  |                |                | <i>Dhrs7b</i>  |                              | <i>Dhrs7b</i> |
| <i>Dhrs9</i>   |                | <i>Dhrs9</i>   | <i>Dhrs9</i>   |                              |               |
| <i>Dhrsx</i>   |                |                | <i>Dhrsx</i>   |                              |               |
| <i>Dhx15</i>   |                |                | <i>Dhx15</i>   |                              |               |
| <i>Dhx16</i>   |                | <i>Dhx16</i>   |                |                              |               |

Suppl. Table 1  
(46/234)

|                | CHIP-Seq hits |                |                | Unique hits with interactors |               |
|----------------|---------------|----------------|----------------|------------------------------|---------------|
|                | unstimulated  | Ac             | LPS            | Ac                           | LPS           |
| <i>Dhx29</i>   |               |                | <i>Dhx29</i>   |                              |               |
| <i>Dhx30</i>   | <i>Dhx30</i>  | <i>Dhx30</i>   | <i>Dhx30</i>   |                              |               |
| <i>Dhx32</i>   |               |                | <i>Dhx32</i>   |                              |               |
| <i>Dhx36</i>   |               |                | <i>Dhx36</i>   |                              | <i>Dhx36</i>  |
| <i>Dhx38</i>   |               |                | <i>Dhx38</i>   |                              |               |
| <i>Dhx57</i>   |               |                | <i>Dhx57</i>   |                              |               |
| <i>Dhx58</i>   |               | <i>Dhx58</i>   | <i>Dhx58</i>   |                              |               |
| <i>Dhx9</i>    |               |                | <i>Dhx9</i>    |                              | <i>Dhx9</i>   |
| <i>Diablo</i>  | <i>Diablo</i> |                |                |                              |               |
| <i>Diap1</i>   |               | <i>Diap1</i>   |                |                              |               |
| <i>Dicer1</i>  |               |                | <i>Dicer1</i>  |                              |               |
| <i>Diexf</i>   |               |                | <i>Diexf</i>   |                              |               |
| <i>Dimt1</i>   | <i>Dimt1</i>  |                | <i>Dimt1</i>   |                              |               |
| <i>Dio1</i>    |               | <i>Dio1</i>    | <i>Dio1</i>    |                              |               |
| <i>Dip2a</i>   |               | <i>Dip2a</i>   |                |                              |               |
| <i>Dip2b</i>   | <i>Dip2b</i>  |                | <i>Dip2b</i>   |                              |               |
| <i>Dip2c</i>   |               | <i>Dip2c</i>   |                |                              |               |
| <i>Diras1</i>  |               |                | <i>Diras1</i>  |                              | <i>Diras1</i> |
| <i>Diras2</i>  |               | <i>Diras2</i>  |                |                              |               |
| <i>Dis3l2</i>  |               | <i>Dis3l2</i>  |                |                              |               |
| <i>Dkk1</i>    |               |                | <i>Dkk1</i>    |                              |               |
| <i>Dkk3</i>    |               |                | <i>Dkk3</i>    |                              | <i>Dkk3</i>   |
| <i>Dkkl1</i>   |               |                | <i>Dkkl1</i>   |                              |               |
| <i>Dlc1</i>    | <i>Dlc1</i>   |                |                |                              |               |
| <i>Dld</i>     |               | <i>Dld</i>     |                |                              |               |
| <i>Dlec1</i>   | <i>Dlec1</i>  |                |                |                              |               |
| <i>Dleu2</i>   |               | <i>Dleu2</i>   |                |                              |               |
| <i>Dlg1</i>    | <i>Dlg1</i>   | <i>Dlg1</i>    | <i>Dlg1</i>    |                              |               |
| <i>Dlg3</i>    |               | <i>Dlg3</i>    |                |                              |               |
| <i>Dlg5</i>    |               | <i>Dlg5</i>    | <i>Dlg5</i>    |                              |               |
| <i>Dlgap3</i>  |               | <i>Dlgap3</i>  |                |                              |               |
| <i>Dlgap4</i>  |               | <i>Dlgap4</i>  |                |                              |               |
| <i>Dlgap5</i>  |               |                | <i>Dlgap5</i>  |                              |               |
| <i>Dll2</i>    | <i>Dll2</i>   |                |                |                              |               |
| <i>Dll1</i>    |               |                | <i>Dll1</i>    |                              |               |
| <i>Dlst</i>    | <i>Dlst</i>   |                |                |                              |               |
| <i>Dlx1</i>    |               |                | <i>Dlx1</i>    |                              | <i>Dlx1</i>   |
| <i>Dlx2</i>    | <i>Dlx2</i>   | <i>Dlx2</i>    |                |                              |               |
| <i>Dlx5</i>    | <i>Dlx5</i>   |                |                |                              |               |
| <i>Dlx6</i>    |               |                | <i>Dlx6</i>    |                              |               |
| <i>Dlx6os1</i> |               |                | <i>Dlx6os1</i> |                              |               |
| <i>Dlx6os2</i> |               | <i>Dlx6os2</i> |                |                              |               |
| <i>Dmap1</i>   | <i>Dmap1</i>  |                |                |                              |               |
| <i>Dmkn</i>    |               | <i>Dmkn</i>    | <i>Dmkn</i>    |                              |               |
| <i>Dmrt1</i>   | <i>Dmrt1</i>  | <i>Dmrt1</i>   | <i>Dmrt1</i>   |                              |               |
| <i>Dmrt2</i>   |               | <i>Dmrt2</i>   |                |                              |               |
| <i>Dmtf1</i>   |               |                | <i>Dmtf1</i>   |                              |               |
| <i>Dmtn</i>    | <i>Dmtn</i>   | <i>Dmtn</i>    | <i>Dmtn</i>    |                              |               |
| <i>Dmxl1</i>   |               |                | <i>Dmxl1</i>   |                              |               |

Suppl. Table 1  
(47/234)

|                 | CHIP-Seq hits |         |          | Unique hits with interactors |       |
|-----------------|---------------|---------|----------|------------------------------|-------|
|                 | unstimulated  | Ac      | LPS      | Ac                           | LPS   |
| <i>Dmnl2</i>    | Dmnl2         |         |          |                              |       |
| <i>Dnaaf2</i>   |               | Dnaaf2  |          |                              |       |
| <i>Dnah10</i>   | Dnah10        |         |          |                              |       |
| <i>Dnah17</i>   |               | Dnah17  |          |                              |       |
| <i>Dnah5</i>    |               |         | Dnah5    |                              |       |
| <i>Dnah7a</i>   | Dnah7a        |         | Dnah7a   |                              |       |
| <i>Dnaic2</i>   | Dnaic2        | Dnaic2  |          |                              |       |
| <i>Dnaja3</i>   |               |         | Dnaja3   |                              |       |
| <i>Dnajb11</i>  |               | Dnajb11 |          |                              |       |
| <i>Dnajb12</i>  |               | Dnajb12 | Dnajb12  |                              |       |
| <i>Dnajb13</i>  |               | Dnajb13 |          |                              |       |
| <i>Dnajb14</i>  |               |         | Dnajb14  |                              |       |
| <i>Dnajb2</i>   | Dnajb2        |         |          |                              |       |
| <i>Dnajb4</i>   | Dnajb4        |         |          |                              |       |
| <i>Dnajb5</i>   | Dnajb5        |         |          |                              |       |
| <i>Dnajb7</i>   |               | Dnajb7  | Dnajb7   |                              |       |
| <i>Dnajb9</i>   | Dnajb9        |         | Dnajb9   |                              |       |
| <i>Dnajc1</i>   |               | Dnajc1  |          |                              |       |
| <i>Dnajc14</i>  |               | Dnajc14 |          |                              |       |
| <i>Dnajc18</i>  | Dnajc18       |         | Dnajc18  |                              |       |
| <i>Dnajc2</i>   |               | Dnajc2  | Dnajc2   |                              |       |
| <i>Dnajc24</i>  |               | Dnajc24 |          |                              |       |
| <i>Dnajc25</i>  | Dnajc25       | Dnajc25 | Dnajc25  |                              |       |
| <i>Dnajc27</i>  |               | Dnajc27 |          | Dnajc27                      |       |
| <i>Dnajc28</i>  |               | Dnajc28 |          |                              |       |
| <i>Dnajc3</i>   |               | Dnajc3  |          |                              |       |
| <i>Dnajc30</i>  |               |         | Dnajc30  |                              |       |
| <i>Dnajc5</i>   |               |         | Dnajc5   |                              |       |
| <i>Dnajc5b</i>  |               |         | Dnajc5b  |                              |       |
| <i>Dnajc5g</i>  | Dnajc5g       | Dnajc5g | Dnajc5g  |                              |       |
| <i>Dnajc6</i>   | Dnajc6        |         |          |                              |       |
| <i>Dnajc9</i>   | Dnajc9        |         |          |                              |       |
| <i>Dnal1</i>    |               | Dnal1   | Dnal1    |                              |       |
| <i>Dnal4</i>    |               | Dnal4   |          |                              |       |
| <i>Dnali1</i>   | Dnali1        | Dnali1  |          |                              |       |
| <i>Dnase1l1</i> |               |         | Dnase1l1 |                              |       |
| <i>Dnase1l3</i> | Dnase1l3      |         | Dnase1l3 |                              |       |
| <i>Dnase2a</i>  | Dnase2a       | Dnase2a |          |                              |       |
| <i>Dner</i>     |               | Dner    | Dner     |                              |       |
| <i>Dnlz</i>     | Dnlz          |         | Dnlz     |                              |       |
| <i>Dnm1l</i>    |               |         | Dnm1l    |                              | Dnm1l |
| <i>Dnm2</i>     |               | Dnm2    |          | Dnm2                         |       |
| <i>Dnmbp</i>    |               | Dnmbp   |          |                              |       |
| <i>Dnmt1</i>    | Dnmt1         |         | Dnmt1    |                              |       |
| <i>Dnmt3a</i>   | Dnmt3a        |         |          |                              |       |
| <i>Dnmt3b</i>   |               |         | Dnmt3b   |                              |       |
| <i>Dnmt3l</i>   | Dnmt3l        | Dnmt3l  | Dnmt3l   |                              |       |
| <i>Dnpep</i>    | Dnpep         |         |          |                              |       |
| <i>Dnph1</i>    |               | Dnph1   |          |                              |       |

Suppl. Table 1  
(48/234)

|                | ChIP-Seq hits |         |         | Unique hits with interactors |       |
|----------------|---------------|---------|---------|------------------------------|-------|
|                | unstimulated  | Ac      | LPS     | Ac                           | LPS   |
| <i>Dntt</i>    |               |         | Dntt    |                              |       |
| <i>Dnttip2</i> |               |         | Dnttip2 |                              |       |
| <i>Doc2b</i>   |               |         | Doc2b   |                              | Doc2b |
| <i>Dock10</i>  | Dock10        | Dock10  | Dock10  |                              |       |
| <i>Dock2</i>   |               | Dock2   |         |                              |       |
| <i>Dock3</i>   | Dock3         |         |         |                              |       |
| <i>Dock8</i>   | Dock8         | Dock8   |         |                              |       |
| <i>Dock9</i>   | Dock9         |         | Dock9   |                              |       |
| <i>Dohh</i>    |               | Dohh    |         |                              |       |
| <i>Dok1</i>    | Dok1          |         |         |                              |       |
| <i>Dok2</i>    |               |         | Dok2    |                              |       |
| <i>Dok3</i>    | Dok3          | Dok3    | Dok3    |                              |       |
| <i>Dok4</i>    |               |         | Dok4    |                              |       |
| <i>Dok5</i>    |               | Dok5    |         |                              |       |
| <i>Dok6</i>    | Dok6          | Dok6    | Dok6    |                              |       |
| <i>Dolk</i>    |               | Dolk    | Dolk    |                              |       |
| <i>Dolpp1</i>  | Dolpp1        |         |         |                              |       |
| <i>Donson</i>  | Donson        | Donson  | Donson  |                              |       |
| <i>Dopey1</i>  | Dopey1        | Dopey1  |         |                              |       |
| <i>Dopey2</i>  | Dopey2        |         | Dopey2  |                              |       |
| <i>Dos</i>     |               | Dos     |         |                              |       |
| <i>Dot1l</i>   |               | Dot1l   | Dot1l   |                              |       |
| <i>Dpagt1</i>  |               | Dpagt1  |         |                              |       |
| <i>Dpep1</i>   |               |         | Dpep1   |                              |       |
| <i>Dpep2</i>   | Dpep2         | Dpep2   | Dpep2   |                              |       |
| <i>Dpep3</i>   |               | Dpep3   | Dpep3   |                              |       |
| <i>Dpf2</i>    |               | Dpf2    |         |                              |       |
| <i>Dph1</i>    |               |         | Dph1    |                              |       |
| <i>Dph3</i>    | Dph3          | Dph3    | Dph3    |                              |       |
| <i>Dph6</i>    |               | Dph6    | Dph6    |                              |       |
| <i>Dph7</i>    |               |         | Dph7    |                              | Dph7  |
| <i>Dpm1</i>    | Dpm1          | Dpm1    |         |                              |       |
| <i>Dpp10</i>   | Dpp10         |         | Dpp10   |                              |       |
| <i>Dpp4</i>    |               | Dpp4    |         |                              |       |
| <i>Dpp6</i>    |               | Dpp6    |         |                              |       |
| <i>Dpp7</i>    |               |         | Dpp7    |                              |       |
| <i>Dpp8</i>    |               | Dpp8    | Dpp8    |                              |       |
| <i>Dpp9</i>    |               |         | Dpp9    |                              |       |
| <i>Dppa1</i>   |               |         | Dppa1   |                              |       |
| <i>Dppa2</i>   |               | Dppa2   |         |                              |       |
| <i>Dppa3</i>   |               | Dppa3   |         |                              |       |
| <i>Dppa5a</i>  |               |         | Dppa5a  |                              |       |
| <i>Dpt</i>     | Dpt           |         |         |                              |       |
| <i>Dpy19l1</i> |               | Dpy19l1 |         | Dpy19l1                      |       |
| <i>Dpy19l4</i> |               | Dpy19l4 |         |                              |       |
| <i>Dpy30</i>   |               | Dpy30   | Dpy30   |                              |       |
| <i>Dpyd</i>    | Dpyd          |         |         |                              |       |
| <i>Dpys</i>    |               |         | Dpys    |                              |       |
| <i>Dpysl3</i>  |               |         | Dpysl3  |                              |       |



Suppl. Table 1  
(49/234)

|                 | CHIP-Seq hits   |                 |                 | Unique hits with interactors |              |
|-----------------|-----------------|-----------------|-----------------|------------------------------|--------------|
|                 | unstimulated    | Ac              | LPS             | Ac                           | LPS          |
| <i>DQ267102</i> | <i>DQ267102</i> |                 |                 |                              |              |
| <i>Dqx1</i>     |                 | <i>Dqx1</i>     | <i>Dqx1</i>     |                              |              |
| <i>Dr1</i>      | <i>Dr1</i>      |                 |                 |                              |              |
| <i>Drap1</i>    |                 |                 | <i>Drap1</i>    |                              |              |
| <i>Draxin</i>   | <i>Draxin</i>   |                 |                 |                              |              |
| <i>Drd1</i>     |                 |                 | <i>Drd1</i>     |                              | <i>Drd1</i>  |
| <i>Drd3</i>     |                 | <i>Drd3</i>     | <i>Drd3</i>     |                              |              |
| <i>Drd5</i>     |                 | <i>Drd5</i>     | <i>Drd5</i>     |                              |              |
| <i>Drosha</i>   |                 |                 | <i>Drosha</i>   |                              |              |
| <i>Dsc1</i>     |                 | <i>Dsc1</i>     |                 |                              |              |
| <i>Dscaml1</i>  | <i>Dscaml1</i>  |                 | <i>Dscaml1</i>  |                              |              |
| <i>Dse</i>      |                 | <i>Dse</i>      | <i>Dse</i>      |                              |              |
| <i>Dsel</i>     | <i>Dsel</i>     |                 |                 |                              |              |
| <i>Dsg1a</i>    |                 | <i>Dsg1a</i>    |                 |                              |              |
| <i>Dsg2</i>     | <i>Dsg2</i>     |                 |                 |                              |              |
| <i>Dsg4</i>     |                 | <i>Dsg4</i>     |                 |                              |              |
| <i>Dsn1</i>     | <i>Dsn1</i>     | <i>Dsn1</i>     | <i>Dsn1</i>     |                              |              |
| <i>Dst</i>      | <i>Dst</i>      | <i>Dst</i>      |                 |                              |              |
| <i>Dstn</i>     |                 |                 | <i>Dstn</i>     |                              |              |
| <i>Dtnb</i>     |                 |                 | <i>Dtnb</i>     |                              |              |
| <i>Dtwd1</i>    |                 |                 | <i>Dtwd1</i>    |                              |              |
| <i>Dtwd2</i>    |                 |                 | <i>Dtwd2</i>    |                              | <i>Dtwd2</i> |
| <i>Dtx2</i>     |                 | <i>Dtx2</i>     | <i>Dtx2</i>     |                              |              |
| <i>Dtx3l</i>    |                 | <i>Dtx3l</i>    |                 |                              |              |
| <i>Dtymk</i>    |                 | <i>Dtymk</i>    | <i>Dtymk</i>    |                              |              |
| <i>Duox1</i>    |                 |                 | <i>Duox1</i>    |                              |              |
| <i>Dupd1</i>    |                 | <i>Dupd1</i>    | <i>Dupd1</i>    |                              |              |
| <i>Dus1l</i>    |                 |                 | <i>Dus1l</i>    |                              |              |
| <i>Dus2</i>     |                 | <i>Dus2</i>     | <i>Dus2</i>     |                              |              |
| <i>Dus4l</i>    |                 |                 | <i>Dus4l</i>    |                              |              |
| <i>Dusp11</i>   |                 | <i>Dusp11</i>   |                 | <i>Dusp11</i>                |              |
| <i>Dusp12</i>   |                 | <i>Dusp12</i>   |                 |                              |              |
| <i>Dusp13</i>   | <i>Dusp13</i>   |                 | <i>Dusp13</i>   |                              |              |
| <i>Dusp23</i>   |                 |                 | <i>Dusp23</i>   |                              |              |
| <i>Dusp26</i>   |                 | <i>Dusp26</i>   |                 | <i>Dusp26</i>                |              |
| <i>Dusp27</i>   |                 |                 | <i>Dusp27</i>   |                              |              |
| <i>Dusp3</i>    |                 |                 | <i>Dusp3</i>    |                              | <i>Dusp3</i> |
| <i>Dusp6</i>    |                 | <i>Dusp6</i>    |                 | <i>Dusp6</i>                 |              |
| <i>Dut</i>      |                 | <i>Dut</i>      | <i>Dut</i>      |                              |              |
| <i>Duxbl1</i>   | <i>Duxbl1</i>   |                 |                 |                              |              |
| <i>Duxbl2</i>   | <i>Duxbl2</i>   |                 |                 |                              |              |
| <i>Duxbl3</i>   | <i>Duxbl3</i>   |                 |                 |                              |              |
| <i>Dvl1</i>     | <i>Dvl1</i>     | <i>Dvl1</i>     |                 |                              |              |
| <i>Dynap</i>    |                 | <i>Dynap</i>    |                 |                              |              |
| <i>Dync1i1</i>  |                 | <i>Dync1i1</i>  |                 | <i>Dync1i1</i>               |              |
| <i>Dync1li1</i> | <i>Dync1li1</i> | <i>Dync1li1</i> | <i>Dync1li1</i> |                              |              |
| <i>Dync2li1</i> |                 | <i>Dync2li1</i> |                 |                              |              |
| <i>Dynll1</i>   |                 | <i>Dynll1</i>   |                 | <i>Dynll1</i>                |              |
| <i>Dynll2</i>   |                 | <i>Dynll2</i>   |                 | <i>Dynll2</i>                |              |

Suppl. Table 1  
(50/234)

|                      | CHIP-Seq hits |               |               | Unique hits with interactors |      |
|----------------------|---------------|---------------|---------------|------------------------------|------|
|                      | unstimulated  | Ac            | LPS           | Ac                           | LPS  |
| <i>Dynlrb2</i>       | Dynlrb2       |               |               |                              |      |
| <i>Dynlt1b</i>       |               |               | Dynlt1b       |                              |      |
| <i>Dynlt3</i>        | Dynlt3        | Dynlt3        | Dynlt3        |                              |      |
| <i>Dyrk1a</i>        | Dyrk1a        |               |               |                              |      |
| <i>Dysf</i>          | Dysf          | Dysf          | Dysf          |                              |      |
| <i>Dytn</i>          |               | Dytn          |               |                              |      |
| <i>Dyx1c1</i>        |               |               | Dyx1c1        |                              |      |
| <i>E030002O03Rik</i> |               | E030002O03Rik |               |                              |      |
| <i>E030003E18Rik</i> |               |               | E030003E18Rik |                              |      |
| <i>E030011O05Rik</i> |               | E030011O05Rik | E030011O05Rik |                              |      |
| <i>E030013I19Rik</i> |               | E030013I19Rik |               |                              |      |
| <i>E030018B13Rik</i> |               |               | E030018B13Rik |                              |      |
| <i>E030024N20Rik</i> | E030024N20Rik | E030024N20Rik |               |                              |      |
| <i>E030025P04Rik</i> |               |               | E030025P04Rik |                              |      |
| <i>E130006D01Rik</i> |               |               | E130006D01Rik |                              |      |
| <i>E130018N17Rik</i> |               |               | E130018N17Rik |                              |      |
| <i>E130102H24Rik</i> |               | E130102H24Rik |               |                              |      |
| <i>E130112N10Rik</i> |               |               | E130112N10Rik |                              |      |
| <i>E130215H24Rik</i> |               | E130215H24Rik |               |                              |      |
| <i>E130218I03Rik</i> |               | E130218I03Rik |               |                              |      |
| <i>E130304I02Rik</i> |               |               | E130304I02Rik |                              |      |
| <i>E130307A14Rik</i> | E130307A14Rik | E130307A14Rik |               |                              |      |
| <i>E130309D02Rik</i> |               | E130309D02Rik |               |                              |      |
| <i>E130310I04Rik</i> |               |               | E130310I04Rik |                              |      |
| <i>E130311K13Rik</i> | E130311K13Rik |               |               |                              |      |
| <i>E130317F20Rik</i> |               |               | E130317F20Rik |                              |      |
| <i>E230013L22Rik</i> |               |               | E230013L22Rik |                              |      |
| <i>E230016K23Rik</i> | E230016K23Rik |               |               |                              |      |
| <i>E230016M11Rik</i> | E230016M11Rik | E230016M11Rik | E230016M11Rik |                              |      |
| <i>E230025N22Rik</i> |               | E230025N22Rik | E230025N22Rik |                              |      |
| <i>E2f2</i>          |               |               | E2f2          |                              | E2f2 |
| <i>E2f4</i>          | E2f4          | E2f4          | E2f4          |                              |      |
| <i>E2f5</i>          | E2f5          | E2f5          | E2f5          |                              |      |
| <i>E2f6</i>          |               | E2f6          |               |                              |      |
| <i>E2f7</i>          |               | E2f7          |               |                              |      |
| <i>E2f8</i>          |               |               | E2f8          |                              |      |
| <i>E330009J07Rik</i> |               |               | E330009J07Rik |                              |      |
| <i>E330011O21Rik</i> | E330011O21Rik |               |               |                              |      |
| <i>E330012B07Rik</i> |               |               | E330012B07Rik |                              |      |
| <i>E330013P04Rik</i> |               | E330013P04Rik | E330013P04Rik |                              |      |
| <i>E330014E10Rik</i> |               |               | E330014E10Rik |                              |      |
| <i>E330017L17Rik</i> |               | E330017L17Rik |               |                              |      |
| <i>E330020D12Rik</i> |               |               | E330020D12Rik |                              |      |
| <i>E330023G01Rik</i> | E330023G01Rik |               | E330023G01Rik |                              |      |
| <i>E330033B04Rik</i> | E330033B04Rik |               |               |                              |      |
| <i>E330034G19Rik</i> |               |               | E330034G19Rik |                              |      |
| <i>E430016F16Rik</i> |               |               | E430016F16Rik |                              |      |
| <i>E430018J23Rik</i> | E430018J23Rik |               | E430018J23Rik |                              |      |
| <i>E430025E21Rik</i> | E430025E21Rik |               | E430025E21Rik |                              |      |

Suppl. Table 1  
(51/234)

|                 | ChIP-Seq hits |         |          | Unique hits with interactors |          |
|-----------------|---------------|---------|----------|------------------------------|----------|
|                 | unstimulated  | Ac      | LPS      | Ac                           | LPS      |
| <i>E4f1</i>     | E4f1          |         |          |                              |          |
| <i>Eaf1</i>     |               | Eaf1    | Eaf1     |                              |          |
| <i>Eapp</i>     | Eapp          | Eapp    | Eapp     |                              |          |
| <i>Ear1</i>     |               | Ear1    |          |                              |          |
| <i>Ear12</i>    |               | Ear12   |          |                              |          |
| <i>Ear2</i>     |               | Ear2    |          |                              |          |
| <i>Ear3</i>     |               | Ear3    |          |                              |          |
| <i>Ebf1</i>     |               | Ebf1    | Ebf1     |                              |          |
| <i>Ebf3</i>     | Ebf3          |         |          |                              |          |
| <i>Ebf4</i>     |               |         | Ebf4     |                              |          |
| <i>Ebi3</i>     | Ebi3          |         |          |                              |          |
| <i>Ebna1bp2</i> |               |         | Ebna1bp2 |                              | Ebna1bp2 |
| <i>Ebp</i>      | Ebp           |         | Ebp      |                              |          |
| <i>Ecd</i>      | Ecd           | Ecd     | Ecd      |                              |          |
| <i>Ece1</i>     |               |         | Ece1     |                              |          |
| <i>Ece2</i>     | Ece2          | Ece2    | Ece2     |                              |          |
| <i>Ech1</i>     | Ech1          | Ech1    | Ech1     |                              |          |
| <i>Echdc1</i>   | Echdc1        |         |          |                              |          |
| <i>Echdc2</i>   | Echdc2        | Echdc2  | Echdc2   |                              |          |
| <i>Echs1</i>    |               |         | Echs1    |                              |          |
| <i>Eci1</i>     |               | Eci1    | Eci1     |                              |          |
| <i>Ecscr</i>    |               | Ecscr   |          |                              |          |
| <i>Ect2</i>     |               |         | Ect2     |                              |          |
| <i>Eda</i>      |               | Eda     |          |                              |          |
| <i>Eda2r</i>    |               |         | Eda2r    |                              |          |
| <i>Edar</i>     |               | Edar    |          |                              |          |
| <i>Edc3</i>     |               | Edc3    |          |                              |          |
| <i>Edem1</i>    |               |         | Edem1    |                              |          |
| <i>Edem3</i>    |               |         | Edem3    |                              | Edem3    |
| <i>Edf1</i>     |               | Edf1    | Edf1     |                              |          |
| <i>Edil3</i>    |               | Edil3   |          | Edil3                        |          |
| <i>Edn2</i>     | Edn2          |         |          |                              |          |
| <i>Edn3</i>     |               |         | Edn3     |                              |          |
| <i>Edrf1</i>    |               |         | Edrf1    |                              |          |
| <i>Eea1</i>     |               | Eea1    |          |                              |          |
| <i>Eed</i>      |               |         | Eed      |                              |          |
| <i>Eef1b2</i>   |               |         | Eef1b2   |                              |          |
| <i>Eef1d</i>    | Eef1d         |         |          |                              |          |
| <i>Eef1g</i>    |               | Eef1g   |          |                              |          |
| <i>Eef2</i>     | Eef2          | Eef2    | Eef2     |                              |          |
| <i>Eef2k</i>    |               | Eef2k   |          |                              |          |
| <i>Eef2kmt</i>  |               |         | Eef2kmt  |                              |          |
| <i>Eefsec</i>   |               |         | Eefsec   |                              |          |
| <i>Efcab10</i>  |               | Efcab10 |          |                              |          |
| <i>Efcab12</i>  |               |         | Efcab12  |                              |          |
| <i>Efcab2</i>   |               | Efcab2  |          |                              |          |
| <i>Efcab3</i>   |               |         | Efcab3   |                              |          |
| <i>Efcab5</i>   | Efcab5        | Efcab5  | Efcab5   |                              |          |
| <i>Efcab6</i>   |               |         | Efcab6   |                              |          |

Suppl. Table 1  
(52/234)

|                | CHIP-Seq hits  |                |                | Unique hits with interactors |               |
|----------------|----------------|----------------|----------------|------------------------------|---------------|
|                | unstimulated   | Ac             | LPS            | Ac                           | LPS           |
| <i>Efcab7</i>  |                | <i>Efcab7</i>  |                |                              |               |
| <i>Efcab8</i>  | <i>Efcab8</i>  | <i>Efcab8</i>  | <i>Efcab8</i>  |                              |               |
| <i>Efcab9</i>  |                |                | <i>Efcab9</i>  |                              |               |
| <i>Efcc1</i>   |                |                | <i>Efcc1</i>   |                              |               |
| <i>Efemp1</i>  | <i>Efemp1</i>  | <i>Efemp1</i>  | <i>Efemp1</i>  |                              |               |
| <i>Efemp2</i>  |                |                | <i>Efemp2</i>  |                              |               |
| <i>Efhb</i>    |                |                | <i>Efhb</i>    |                              |               |
| <i>Efna4</i>   |                | <i>Efna4</i>   | <i>Efna4</i>   |                              |               |
| <i>Efna5</i>   |                |                | <i>Efna5</i>   |                              |               |
| <i>Efnb1</i>   |                |                | <i>Efnb1</i>   |                              |               |
| <i>Efnb2</i>   |                | <i>Efnb2</i>   |                | <i>Efnb2</i>                 |               |
| <i>Efnb3</i>   |                | <i>Efnb3</i>   |                |                              |               |
| <i>Efr3a</i>   |                | <i>Efr3a</i>   |                | <i>Efr3a</i>                 |               |
| <i>Egfbp2</i>  |                | <i>Egfbp2</i>  |                |                              |               |
| <i>Egfem1</i>  |                |                | <i>Egfem1</i>  |                              |               |
| <i>Egfl8</i>   | <i>Egfl8</i>   |                |                |                              |               |
| <i>Egflam</i>  | <i>Egflam</i>  |                |                |                              |               |
| <i>Egln1</i>   |                | <i>Egln1</i>   |                |                              |               |
| <i>Egr3</i>    | <i>Egr3</i>    |                | <i>Egr3</i>    |                              |               |
| <i>Ehd1</i>    | <i>Ehd1</i>    |                |                |                              |               |
| <i>Ehd2</i>    |                | <i>Ehd2</i>    | <i>Ehd2</i>    |                              |               |
| <i>Ehmt1</i>   | <i>Ehmt1</i>   | <i>Ehmt1</i>   | <i>Ehmt1</i>   |                              |               |
| <i>Ehmt2</i>   |                | <i>Ehmt2</i>   |                |                              |               |
| <i>Eid1</i>    | <i>Eid1</i>    |                | <i>Eid1</i>    |                              |               |
| <i>Eid2</i>    |                |                | <i>Eid2</i>    |                              |               |
| <i>Eid3</i>    |                |                | <i>Eid3</i>    |                              |               |
| <i>Eif1</i>    |                | <i>Eif1</i>    | <i>Eif1</i>    |                              |               |
| <i>Eif1a</i>   |                | <i>Eif1a</i>   |                |                              |               |
| <i>Eif1ad</i>  |                |                | <i>Eif1ad</i>  |                              | <i>Eif1ad</i> |
| <i>Eif1b</i>   |                | <i>Eif1b</i>   |                |                              |               |
| <i>Eif2ak3</i> | <i>Eif2ak3</i> | <i>Eif2ak3</i> |                |                              |               |
| <i>Eif2b4</i>  |                |                | <i>Eif2b4</i>  |                              |               |
| <i>Eif2b5</i>  |                |                | <i>Eif2b5</i>  |                              |               |
| <i>Eif2s1</i>  | <i>Eif2s1</i>  | <i>Eif2s1</i>  |                |                              |               |
| <i>Eif2s3x</i> | <i>Eif2s3x</i> |                | <i>Eif2s3x</i> |                              |               |
| <i>Eif3b</i>   |                |                | <i>Eif3b</i>   |                              |               |
| <i>Eif3c</i>   |                | <i>Eif3c</i>   | <i>Eif3c</i>   |                              |               |
| <i>Eif3d</i>   |                | <i>Eif3d</i>   |                |                              |               |
| <i>Eif3e</i>   |                | <i>Eif3e</i>   |                |                              |               |
| <i>Eif3h</i>   |                |                | <i>Eif3h</i>   |                              |               |
| <i>Eif3i</i>   |                | <i>Eif3i</i>   |                |                              |               |
| <i>Eif3j1</i>  |                |                | <i>Eif3j1</i>  |                              |               |
| <i>Eif3j2</i>  |                |                | <i>Eif3j2</i>  |                              |               |
| <i>Eif3k</i>   |                |                | <i>Eif3k</i>   |                              |               |
| <i>Eif3l</i>   |                |                | <i>Eif3l</i>   |                              |               |
| <i>Eif3m</i>   | <i>Eif3m</i>   | <i>Eif3m</i>   |                |                              |               |
| <i>Eif4a2</i>  | <i>Eif4a2</i>  | <i>Eif4a2</i>  | <i>Eif4a2</i>  |                              |               |
| <i>Eif4a3</i>  | <i>Eif4a3</i>  |                |                |                              |               |
| <i>Eif4b</i>   |                | <i>Eif4b</i>   |                |                              |               |

Suppl. Table 1  
(53/234)

|                           | ChIP-Seq hits  |                  |                           | Unique hits with interactors |               |
|---------------------------|----------------|------------------|---------------------------|------------------------------|---------------|
|                           | unstimulated   | Ac               | LPS                       | Ac                           | LPS           |
| <i>Eif4e</i>              |                | <i>Eif4e</i>     | <i>Eif4e</i>              |                              |               |
| <i>Eif4e2</i>             |                |                  | <i>Eif4e2</i>             |                              | <i>Eif4e2</i> |
| <i>Eif4ebp2</i>           |                |                  | <i>Eif4ebp2</i>           |                              |               |
| <i>Eif4enif1</i>          |                | <i>Eif4enif1</i> |                           |                              |               |
| <i>Eif4g1</i>             |                | <i>Eif4g1</i>    | <i>Eif4g1</i>             |                              |               |
| <i>Eif4h</i>              |                | <i>Eif4h</i>     | <i>Eif4h</i>              |                              |               |
| <i>Eif5</i>               | <i>Eif5</i>    |                  |                           |                              |               |
| <i>Eif5a</i>              |                | <i>Eif5a</i>     |                           | <i>Eif5a</i>                 |               |
| <i>Eif5b</i>              |                |                  | <i>Eif5b</i>              |                              |               |
| <i>Elane</i>              |                | <i>Elane</i>     |                           | <i>Elane</i>                 |               |
| <i>Elavl1</i>             | <i>Elavl1</i>  | <i>Elavl1</i>    |                           |                              |               |
| <i>Elavl2</i>             | <i>Elavl2</i>  |                  | <i>Elavl2</i>             |                              |               |
| <i>Elavl3</i>             |                |                  | <i>Elavl3</i>             |                              | <i>Elavl3</i> |
| <i>Elavl4</i>             |                |                  | <i>Elavl4</i>             |                              |               |
| <i>Eldr</i>               |                | <i>Eldr</i>      |                           |                              |               |
| <i>Elf2</i>               |                | <i>Elf2</i>      |                           |                              |               |
| <i>Elf4</i>               |                |                  | <i>Elf4</i>               |                              |               |
| <i>Elk1</i>               |                | <i>Elk1</i>      |                           |                              |               |
| <i>Elk3</i>               | <i>Elk3</i>    |                  |                           |                              |               |
| <i>Ell3</i>               |                | <i>Ell3</i>      | <i>Ell3</i>               |                              |               |
| <i>Elmo1</i>              | <i>Elmo1</i>   | <i>Elmo1</i>     | <i>Elmo1</i>              |                              |               |
| <i>Elmo2</i>              |                | <i>Elmo2</i>     |                           |                              |               |
| <i>Elmod1</i>             |                | <i>Elmod1</i>    |                           | <i>Elmod1</i>                |               |
| <i>Elmod3</i>             |                |                  | <i>Elmod3</i>             |                              |               |
| <i>Eln</i>                |                | <i>Eln</i>       |                           | <i>Eln</i>                   |               |
| <i>Elof1</i>              |                | <i>Elof1</i>     | <i>Elof1</i>              |                              |               |
| <i>Elov11</i>             |                | <i>Elov11</i>    | <i>Elov11</i>             |                              |               |
| <i>Elov12</i>             |                |                  | <i>Elov12</i>             |                              | <i>Elov12</i> |
| <i>Elov13</i>             |                |                  | <i>Elov13</i>             |                              |               |
| <i>Elov15</i>             |                | <i>Elov15</i>    | <i>Elov15</i>             |                              |               |
| <i>Elov16</i>             |                | <i>Elov16</i>    | <i>Elov16</i>             |                              |               |
| <i>Elov17</i>             |                | <i>Elov17</i>    |                           | <i>Elov17</i>                |               |
| <i>Elp3</i>               | <i>Elp3</i>    |                  |                           |                              |               |
| <i>Elp4</i>               | <i>Elp4</i>    |                  | <i>Elp4</i>               |                              |               |
| <i>Elp5</i>               |                | <i>Elp5</i>      |                           |                              |               |
| <i>Emb</i>                |                |                  | <i>Emb</i>                |                              |               |
| <i>Emc10</i>              |                |                  | <i>Emc10</i>              |                              |               |
| <i>Emc4</i>               |                | <i>Emc4</i>      |                           |                              |               |
| <i>Emc7</i>               |                | <i>Emc7</i>      | <i>Emc7</i>               |                              |               |
| <i>Emc8</i>               |                |                  | <i>Emc8</i>               |                              | <i>Emc8</i>   |
| <i>Emc8-1190005i06rik</i> |                |                  | <i>Emc8-1190005i06rik</i> |                              |               |
| <i>Emc9</i>               |                | <i>Emc9</i>      |                           |                              |               |
| <i>Emd</i>                |                | <i>Emd</i>       |                           |                              |               |
| <i>Eme1</i>               |                | <i>Eme1</i>      | <i>Eme1</i>               |                              |               |
| <i>Emid1</i>              |                |                  | <i>Emid1</i>              |                              |               |
| <i>Emilin1</i>            | <i>Emilin1</i> |                  |                           |                              |               |
| <i>Eml1</i>               |                |                  | <i>Eml1</i>               |                              | <i>Eml1</i>   |
| <i>Eml2</i>               | <i>Eml2</i>    |                  |                           |                              |               |
| <i>Emp1</i>               | <i>Emp1</i>    | <i>Emp1</i>      | <i>Emp1</i>               |                              |               |

Suppl. Table 1  
(54/234)

|                  | CHIP-Seq hits    |                  |                  | Unique hits with interactors |     |
|------------------|------------------|------------------|------------------|------------------------------|-----|
|                  | unstimulated     | Ac               | LPS              | Ac                           | LPS |
| <i>Emp2</i>      |                  | <i>Emp2</i>      |                  | <i>Emp2</i>                  |     |
| <i>Emp3</i>      |                  | <i>Emp3</i>      |                  |                              |     |
| <i>Emx2os</i>    |                  |                  | <i>Emx2os</i>    |                              |     |
| <i>En2</i>       | <i>En2</i>       | <i>En2</i>       |                  |                              |     |
| <i>Enah</i>      |                  |                  | <i>Enah</i>      |                              |     |
| <i>Enam</i>      |                  | <i>Enam</i>      |                  |                              |     |
| <i>Endog</i>     |                  |                  | <i>Endog</i>     |                              |     |
| <i>Endov</i>     |                  | <i>Endov</i>     |                  | <i>Endov</i>                 |     |
| <i>Engase</i>    | <i>Engase</i>    |                  | <i>Engase</i>    |                              |     |
| <i>Enkur</i>     |                  | <i>Enkur</i>     |                  |                              |     |
| <i>Eno1</i>      |                  |                  | <i>Eno1</i>      |                              |     |
| <i>Eno1b</i>     |                  |                  | <i>Eno1b</i>     |                              |     |
| <i>Eno4</i>      |                  | <i>Eno4</i>      |                  |                              |     |
| <i>Enoph1</i>    |                  | <i>Enoph1</i>    |                  |                              |     |
| <i>Enox1</i>     | <i>Enox1</i>     | <i>Enox1</i>     | <i>Enox1</i>     |                              |     |
| <i>Enox2</i>     | <i>Enox2</i>     |                  | <i>Enox2</i>     |                              |     |
| <i>Enpep</i>     |                  | <i>Enpep</i>     | <i>Enpep</i>     |                              |     |
| <i>Enpp1</i>     |                  | <i>Enpp1</i>     | <i>Enpp1</i>     |                              |     |
| <i>Enpp2</i>     |                  |                  | <i>Enpp2</i>     |                              |     |
| <i>Enpp3</i>     | <i>Enpp3</i>     |                  |                  |                              |     |
| <i>Ensa</i>      |                  | <i>Ensa</i>      | <i>Ensa</i>      |                              |     |
| <i>Enthd1</i>    | <i>Enthd1</i>    |                  | <i>Enthd1</i>    |                              |     |
| <i>Entpd1</i>    |                  | <i>Entpd1</i>    | <i>Entpd1</i>    |                              |     |
| <i>Entpd4</i>    |                  | <i>Entpd4</i>    | <i>Entpd4</i>    |                              |     |
| <i>Entpd8</i>    |                  | <i>Entpd8</i>    |                  |                              |     |
| <i>Eny2</i>      |                  | <i>Eny2</i>      |                  | <i>Eny2</i>                  |     |
| <i>Ep400</i>     |                  | <i>Ep400</i>     | <i>Ep400</i>     |                              |     |
| <i>Epb4.1</i>    |                  | <i>Epb4.1</i>    |                  | <i>Epb4.1</i>                |     |
| <i>Epb4.1l2</i>  | <i>Epb4.1l2</i>  |                  | <i>Epb4.1l2</i>  |                              |     |
| <i>Epb4.1l3</i>  |                  | <i>Epb4.1l3</i>  |                  |                              |     |
| <i>Epb4.1l4a</i> | <i>Epb4.1l4a</i> |                  |                  |                              |     |
| <i>Epb4.1l4b</i> |                  | <i>Epb4.1l4b</i> | <i>Epb4.1l4b</i> |                              |     |
| <i>Epc1</i>      |                  |                  | <i>Epc1</i>      |                              |     |
| <i>Epc2</i>      |                  | <i>Epc2</i>      |                  |                              |     |
| <i>Epdr1</i>     |                  |                  | <i>Epdr1</i>     |                              |     |
| <i>Epha10</i>    | <i>Epha10</i>    | <i>Epha10</i>    |                  |                              |     |
| <i>Epha3</i>     | <i>Epha3</i>     | <i>Epha3</i>     |                  |                              |     |
| <i>Epha6</i>     |                  |                  | <i>Epha6</i>     |                              |     |
| <i>Epha7</i>     | <i>Epha7</i>     |                  |                  |                              |     |
| <i>Epha8</i>     |                  | <i>Epha8</i>     |                  | <i>Epha8</i>                 |     |
| <i>Ephb1</i>     |                  | <i>Ephb1</i>     |                  |                              |     |
| <i>Ephb4</i>     |                  |                  | <i>Ephb4</i>     |                              |     |
| <i>Ephx1</i>     | <i>Ephx1</i>     | <i>Ephx1</i>     |                  |                              |     |
| <i>Ephx2</i>     |                  | <i>Ephx2</i>     |                  |                              |     |
| <i>Epm2a</i>     |                  | <i>Epm2a</i>     |                  |                              |     |
| <i>Epm2aip1</i>  |                  | <i>Epm2aip1</i>  |                  |                              |     |
| <i>Eprs</i>      |                  | <i>Eprs</i>      | <i>Eprs</i>      |                              |     |
| <i>Eps15</i>     | <i>Eps15</i>     | <i>Eps15</i>     |                  |                              |     |
| <i>Eps15l1</i>   |                  |                  | <i>Eps15l1</i>   |                              |     |

Suppl. Table 1  
(55/234)

|               | CHIP-Seq hits |               |               | Unique hits with interactors |              |
|---------------|---------------|---------------|---------------|------------------------------|--------------|
|               | unstimulated  | Ac            | LPS           | Ac                           | LPS          |
| <i>Eps8</i>   |               | <i>Eps8</i>   | <i>Eps8</i>   |                              |              |
| <i>Eps8l3</i> | <i>Eps8l3</i> |               |               |                              |              |
| <i>Epsti1</i> |               | <i>Epsti1</i> |               |                              |              |
| <i>Epyc</i>   |               | <i>Epyc</i>   | <i>Epyc</i>   |                              |              |
| <i>Eral1</i>  | <i>Eral1</i>  | <i>Eral1</i>  | <i>Eral1</i>  |                              |              |
| <i>Eras</i>   |               | <i>Eras</i>   | <i>Eras</i>   |                              |              |
| <i>Erb2</i>   |               |               | <i>Erb2</i>   |                              |              |
| <i>Erc1</i>   | <i>Erc1</i>   |               | <i>Erc1</i>   |                              |              |
| <i>Ercc1</i>  | <i>Ercc1</i>  |               |               |                              |              |
| <i>Ercc2</i>  |               |               | <i>Ercc2</i>  |                              |              |
| <i>Ercc5</i>  |               |               | <i>Ercc5</i>  |                              |              |
| <i>Ercc6</i>  | <i>Ercc6</i>  |               |               |                              |              |
| <i>Ercc6l</i> | <i>Ercc6l</i> |               |               |                              |              |
| <i>Erdr1</i>  | <i>Erdr1</i>  | <i>Erdr1</i>  | <i>Erdr1</i>  |                              |              |
| <i>Erf</i>    |               | <i>Erf</i>    |               |                              |              |
| <i>Ergic1</i> |               | <i>Ergic1</i> | <i>Ergic1</i> |                              |              |
| <i>Erh</i>    |               |               | <i>Erh</i>    |                              |              |
| <i>Eri3</i>   |               | <i>Eri3</i>   | <i>Eri3</i>   |                              |              |
| <i>Erich3</i> |               | <i>Erich3</i> |               |                              |              |
| <i>Erich4</i> |               |               | <i>Erich4</i> |                              |              |
| <i>Erlec1</i> |               |               | <i>Erlec1</i> |                              |              |
| <i>Erlin2</i> |               | <i>Erlin2</i> |               | <i>Erlin2</i>                |              |
| <i>Ermap</i>  |               | <i>Ermap</i>  | <i>Ermap</i>  |                              |              |
| <i>Ermard</i> | <i>Ermard</i> |               | <i>Ermard</i> |                              |              |
| <i>Ern1</i>   |               |               | <i>Ern1</i>   |                              |              |
| <i>Ern2</i>   |               | <i>Ern2</i>   |               |                              |              |
| <i>Ero1lb</i> | <i>Ero1lb</i> |               |               |                              |              |
| <i>Erp27</i>  |               | <i>Erp27</i>  |               |                              |              |
| <i>Erp29</i>  |               | <i>Erp29</i>  |               |                              |              |
| <i>Esco1</i>  |               | <i>Esco1</i>  |               |                              |              |
| <i>Esco2</i>  | <i>Esco2</i>  |               | <i>Esco2</i>  |                              |              |
| <i>Esd</i>    |               |               | <i>Esd</i>    |                              |              |
| <i>Esf1</i>   | <i>Esf1</i>   |               |               |                              |              |
| <i>Esp23</i>  |               |               | <i>Esp23</i>  |                              |              |
| <i>Esp24</i>  |               | <i>Esp24</i>  |               |                              |              |
| <i>Esp31</i>  |               | <i>Esp31</i>  |               |                              |              |
| <i>Esp36</i>  |               | <i>Esp36</i>  |               |                              |              |
| <i>Esp38</i>  |               |               | <i>Esp38</i>  |                              |              |
| <i>Esp4</i>   | <i>Esp4</i>   |               |               |                              |              |
| <i>Esp6</i>   |               | <i>Esp6</i>   |               |                              |              |
| <i>Espn</i>   |               | <i>Espn</i>   | <i>Espn</i>   |                              |              |
| <i>Esrp1</i>  | <i>Esrp1</i>  |               |               |                              |              |
| <i>Esrp2</i>  | <i>Esrp2</i>  |               |               |                              |              |
| <i>Esrra</i>  | <i>Esrra</i>  |               |               |                              |              |
| <i>Esrrg</i>  |               |               | <i>Esrrg</i>  |                              | <i>Esrrg</i> |
| <i>Esyt1</i>  |               |               | <i>Esyt1</i>  |                              |              |
| <i>Esyt2</i>  | <i>Esyt2</i>  |               | <i>Esyt2</i>  |                              |              |
| <i>Esyt3</i>  | <i>Esyt3</i>  |               |               |                              |              |
| <i>Etaa1</i>  |               |               | <i>Etaa1</i>  |                              |              |

Suppl. Table 1  
(56/234)

|                      | CHIP-Seq hits        |                 |                      | Unique hits with interactors |              |
|----------------------|----------------------|-----------------|----------------------|------------------------------|--------------|
|                      | unstimulated         | Ac              | LPS                  | Ac                           | LPS          |
| <i>Etaa1os</i>       |                      | <i>Etaa1os</i>  | <i>Etaa1os</i>       |                              |              |
| <i>Etd</i>           | <i>Etd</i>           |                 |                      |                              |              |
| <i>Etf1</i>          |                      |                 | <i>Etf1</i>          |                              |              |
| <i>Etfdh</i>         |                      |                 | <i>Etfdh</i>         |                              |              |
| <i>Etl4</i>          |                      | <i>Etl4</i>     | <i>Etl4</i>          |                              |              |
| <i>Etnk1</i>         | <i>Etnk1</i>         | <i>Etnk1</i>    | <i>Etnk1</i>         |                              |              |
| <i>Etphi1</i>        | <i>Etphi1</i>        |                 |                      |                              |              |
| <i>Ets1</i>          | <i>Ets1</i>          | <i>Ets1</i>     | <i>Ets1</i>          |                              |              |
| <i>Ets2</i>          |                      | <i>Ets2</i>     | <i>Ets2</i>          |                              |              |
| <i>Etv1</i>          | <i>Etv1</i>          |                 |                      |                              |              |
| <i>Etv6</i>          |                      | <i>Etv6</i>     |                      |                              |              |
| <i>EU599041</i>      | <i>EU599041</i>      | <i>EU599041</i> | <i>EU599041</i>      |                              |              |
| <i>Eva1a</i>         |                      | <i>Eva1a</i>    |                      |                              |              |
| <i>Eva1c</i>         |                      |                 | <i>Eva1c</i>         |                              |              |
| <i>Evi2a</i>         |                      |                 | <i>Evi2a</i>         |                              |              |
| <i>Evi2b</i>         |                      |                 | <i>Evi2b</i>         |                              | <i>Evi2b</i> |
| <i>Evi5</i>          |                      |                 | <i>Evi5</i>          |                              |              |
| <i>Evl</i>           |                      | <i>Evl</i>      | <i>Evl</i>           |                              |              |
| <i>Evpl</i>          | <i>Evpl</i>          | <i>Evpl</i>     | <i>Evpl</i>          |                              |              |
| <i>Evx1</i>          |                      |                 | <i>Evx1</i>          |                              |              |
| <i>Evx2</i>          | <i>Evx2</i>          | <i>Evx2</i>     | <i>Evx2</i>          |                              |              |
| <i>Exd1</i>          |                      | <i>Exd1</i>     |                      |                              |              |
| <i>Exd2</i>          | <i>Exd2</i>          | <i>Exd2</i>     | <i>Exd2</i>          |                              |              |
| <i>Exo5</i>          |                      |                 | <i>Exo5</i>          |                              |              |
| <i>Exoc3</i>         |                      | <i>Exoc3</i>    |                      |                              |              |
| <i>Exoc3l</i>        |                      |                 | <i>Exoc3l</i>        |                              |              |
| <i>Exoc4</i>         | <i>Exoc4</i>         |                 |                      |                              |              |
| <i>Exoc5</i>         |                      | <i>Exoc5</i>    | <i>Exoc5</i>         |                              |              |
| <i>Exoc6</i>         | <i>Exoc6</i>         | <i>Exoc6</i>    |                      |                              |              |
| <i>Exoc6b</i>        |                      |                 | <i>Exoc6b</i>        |                              |              |
| <i>Exoc7</i>         |                      | <i>Exoc7</i>    |                      | <i>Exoc7</i>                 |              |
| <i>Exosc10</i>       |                      | <i>Exosc10</i>  |                      |                              |              |
| <i>Exosc5</i>        | <i>Exosc5</i>        | <i>Exosc5</i>   | <i>Exosc5</i>        |                              |              |
| <i>Exosc7</i>        |                      | <i>Exosc7</i>   | <i>Exosc7</i>        |                              |              |
| <i>Exosc8</i>        |                      |                 | <i>Exosc8</i>        |                              |              |
| <i>Exph5</i>         |                      | <i>Exph5</i>    | <i>Exph5</i>         |                              |              |
| <i>Ext2</i>          | <i>Ext2</i>          | <i>Ext2</i>     |                      |                              |              |
| <i>Extl2</i>         |                      | <i>Extl2</i>    | <i>Extl2</i>         |                              |              |
| <i>Extl3</i>         |                      | <i>Extl3</i>    |                      | <i>Extl3</i>                 |              |
| <i>Eya1</i>          | <i>Eya1</i>          | <i>Eya1</i>     | <i>Eya1</i>          |                              |              |
| <i>Eya3</i>          |                      | <i>Eya3</i>     |                      |                              |              |
| <i>Eya4</i>          |                      | <i>Eya4</i>     |                      |                              |              |
| <i>Ezh1</i>          |                      |                 | <i>Ezh1</i>          |                              | <i>Ezh1</i>  |
| <i>F11</i>           |                      |                 | <i>F11</i>           |                              |              |
| <i>F11r</i>          | <i>F11r</i>          |                 | <i>F11r</i>          |                              |              |
| <i>F2</i>            | <i>F2</i>            | <i>F2</i>       | <i>F2</i>            |                              |              |
| <i>F2rl1</i>         |                      |                 | <i>F2rl1</i>         |                              |              |
| <i>F2rl3</i>         |                      | <i>F2rl3</i>    | <i>F2rl3</i>         |                              |              |
| <i>F630111L10Rik</i> | <i>F630111L10Rik</i> |                 | <i>F630111L10Rik</i> |                              |              |



Suppl. Table 1  
(57/234)

|                      | CHIP-Seq hits |               |          | Unique hits with interactors |         |
|----------------------|---------------|---------------|----------|------------------------------|---------|
|                      | unstimulated  | Ac            | LPS      | Ac                           | LPS     |
| <i>F8</i>            |               |               | F8       |                              |         |
| <i>F830016B08Rik</i> |               | F830016B08Rik |          |                              |         |
| <i>Fabp2</i>         |               | Fabp2         | Fabp2    |                              |         |
| <i>Fabp4</i>         |               |               | Fabp4    |                              | Fabp4   |
| <i>Fabp9</i>         |               |               | Fabp9    |                              |         |
| <i>Fads2</i>         |               |               | Fads2    |                              |         |
| <i>Fads3</i>         | Fads3         |               |          |                              |         |
| <i>Fads6</i>         |               | Fads6         |          |                              |         |
| <i>Faf1</i>          |               |               | Faf1     |                              |         |
| <i>Fahd1</i>         |               |               | Fahd1    |                              |         |
| <i>Fahd2a</i>        |               | Fahd2a        |          |                              |         |
| <i>Faim</i>          |               | Faim          |          |                              |         |
| <i>Faim2</i>         |               |               | Faim2    |                              | Faim2   |
| <i>Fam102a</i>       |               | Fam102a       | Fam102a  |                              |         |
| <i>Fam103a1</i>      |               |               | Fam103a1 |                              |         |
| <i>Fam105a</i>       | Fam105a       |               |          |                              |         |
| <i>Fam109a</i>       |               | Fam109a       |          |                              |         |
| <i>Fam111a</i>       |               |               | Fam111a  |                              |         |
| <i>Fam114a1</i>      | Fam114a1      |               | Fam114a1 |                              |         |
| <i>Fam117a</i>       | Fam117a       |               | Fam117a  |                              |         |
| <i>Fam117b</i>       |               |               | Fam117b  |                              | Fam117b |
| <i>Fam118a</i>       | Fam118a       |               |          |                              |         |
| <i>Fam118b</i>       | Fam118b       |               |          |                              |         |
| <i>Fam120aos</i>     | Fam120aos     |               |          |                              |         |
| <i>Fam120b</i>       | Fam120b       | Fam120b       |          |                              |         |
| <i>Fam120c</i>       |               | Fam120c       |          | Fam120c                      |         |
| <i>Fam122b</i>       |               | Fam122b       |          | Fam122b                      |         |
| <i>Fam122c</i>       |               | Fam122c       |          |                              |         |
| <i>Fam124b</i>       |               |               | Fam124b  |                              |         |
| <i>Fam126a</i>       |               | Fam126a       |          |                              |         |
| <i>Fam126b</i>       |               |               | Fam126b  |                              | Fam126b |
| <i>Fam129a</i>       |               | Fam129a       | Fam129a  |                              |         |
| <i>Fam129b</i>       | Fam129b       |               |          |                              |         |
| <i>Fam131a</i>       |               | Fam131a       | Fam131a  |                              |         |
| <i>Fam132a</i>       | Fam132a       |               |          |                              |         |
| <i>Fam133b</i>       | Fam133b       | Fam133b       | Fam133b  |                              |         |
| <i>Fam134a</i>       |               |               | Fam134a  |                              | Fam134a |
| <i>Fam134b</i>       |               | Fam134b       |          |                              |         |
| <i>Fam134c</i>       | Fam134c       | Fam134c       | Fam134c  |                              |         |
| <i>Fam135a</i>       |               | Fam135a       |          |                              |         |
| <i>Fam13a</i>        | Fam13a        |               |          |                              |         |
| <i>Fam13c</i>        |               | Fam13c        | Fam13c   |                              |         |
| <i>Fam149a</i>       | Fam149a       |               |          |                              |         |
| <i>Fam149b</i>       |               | Fam149b       | Fam149b  |                              |         |
| <i>Fam150b</i>       |               | Fam150b       |          |                              |         |
| <i>Fam151b</i>       |               |               | Fam151b  |                              |         |
| <i>Fam160a2</i>      |               |               | Fam160a2 |                              |         |
| <i>Fam161b</i>       |               | Fam161b       | Fam161b  |                              |         |
| <i>Fam162a</i>       |               | Fam162a       |          |                              |         |

Suppl. Table 1  
(58/234)

|                  | ChIP-Seq hits |          |           | Unique hits with interactors |     |
|------------------|---------------|----------|-----------|------------------------------|-----|
|                  | unstimulated  | Ac       | LPS       | Ac                           | LPS |
| <i>Fam162b</i>   |               |          | Fam162b   |                              |     |
| <i>Fam163a</i>   |               | Fam163a  |           | Fam163a                      |     |
| <i>Fam166b</i>   |               | Fam166b  |           |                              |     |
| <i>Fam167a</i>   |               | Fam167a  |           |                              |     |
| <i>Fam168a</i>   |               | Fam168a  |           | Fam168a                      |     |
| <i>Fam169b</i>   |               |          | Fam169b   |                              |     |
| <i>Fam171a2</i>  |               | Fam171a2 | Fam171a2  |                              |     |
| <i>Fam171b</i>   |               |          | Fam171b   |                              |     |
| <i>Fam172a</i>   |               | Fam172a  | Fam172a   |                              |     |
| <i>Fam173b</i>   | Fam173b       |          | Fam173b   |                              |     |
| <i>Fam175a</i>   |               | Fam175a  | Fam175a   |                              |     |
| <i>Fam177a</i>   |               | Fam177a  | Fam177a   |                              |     |
| <i>Fam178a</i>   |               | Fam178a  |           | Fam178a                      |     |
| <i>Fam179b</i>   |               | Fam179b  | Fam179b   |                              |     |
| <i>Fam180a</i>   |               |          | Fam180a   |                              |     |
| <i>Fam184a</i>   | Fam184a       | Fam184a  |           |                              |     |
| <i>Fam185a</i>   |               | Fam185a  | Fam185a   |                              |     |
| <i>Fam186b</i>   | Fam186b       | Fam186b  | Fam186b   |                              |     |
| <i>Fam187b</i>   |               | Fam187b  | Fam187b   |                              |     |
| <i>Fam188a</i>   |               | Fam188a  |           |                              |     |
| <i>Fam189a1</i>  | Fam189a1      |          |           |                              |     |
| <i>Fam189a2</i>  | Fam189a2      | Fam189a2 |           |                              |     |
| <i>Fam192a</i>   |               |          | Fam192a   |                              |     |
| <i>Fam193a</i>   | Fam193a       | Fam193a  | Fam193a   |                              |     |
| <i>Fam193b</i>   | Fam193b       | Fam193b  | Fam193b   |                              |     |
| <i>Fam195b</i>   | Fam195b       | Fam195b  |           |                              |     |
| <i>Fam198a</i>   |               | Fam198a  |           | Fam198a                      |     |
| <i>Fam198b</i>   |               | Fam198b  |           | Fam198b                      |     |
| <i>Fam19a3</i>   |               |          | Fam19a3   |                              |     |
| <i>Fam19a5</i>   |               | Fam19a5  | Fam19a5   |                              |     |
| <i>Fam204a</i>   |               | Fam204a  | Fam204a   |                              |     |
| <i>Fam207a</i>   | Fam207a       | Fam207a  | Fam207a   |                              |     |
| <i>Fam208b</i>   |               |          | Fam208b   |                              |     |
| <i>Fam209</i>    |               |          | Fam209    |                              |     |
| <i>Fam20a</i>    | Fam20a        | Fam20a   |           |                              |     |
| <i>Fam21</i>     |               | Fam21    |           |                              |     |
| <i>Fam210a</i>   |               | Fam210a  |           |                              |     |
| <i>Fam210b</i>   |               | Fam210b  |           |                              |     |
| <i>Fam212a</i>   |               |          | Fam212a   |                              |     |
| <i>Fam213b</i>   | Fam213b       |          |           |                              |     |
| <i>Fam214a</i>   |               |          | Fam214a   |                              |     |
| <i>Fam214b</i>   |               | Fam214b  | Fam214b   |                              |     |
| <i>Fam216b</i>   |               | Fam216b  | Fam216b   |                              |     |
| <i>Fam217a</i>   | Fam217a       |          |           |                              |     |
| <i>Fam219aos</i> |               |          | Fam219aos |                              |     |
| <i>Fam219b</i>   | Fam219b       | Fam219b  | Fam219b   |                              |     |
| <i>Fam221a</i>   | Fam221a       |          |           |                              |     |
| <i>Fam222b</i>   |               | Fam222b  |           |                              |     |
| <i>Fam227a</i>   |               | Fam227a  |           | Fam227a                      |     |

Suppl. Table 1  
(59/234)

|                | CHIP-Seq hits |         |         | Unique hits with interactors |        |
|----------------|---------------|---------|---------|------------------------------|--------|
|                | unstimulated  | Ac      | LPS     | Ac                           | LPS    |
| <i>Fam227b</i> | Fam227b       | Fam227b | Fam227b |                              |        |
| <i>Fam228a</i> |               |         | Fam228a |                              |        |
| <i>Fam228b</i> |               | Fam228b |         |                              |        |
| <i>Fam24a</i>  | Fam24a        |         |         |                              |        |
| <i>Fam26e</i>  |               | Fam26e  |         |                              |        |
| <i>Fam26f</i>  | Fam26f        | Fam26f  | Fam26f  |                              |        |
| <i>Fam3a</i>   |               | Fam3a   |         |                              |        |
| <i>Fam3b</i>   |               | Fam3b   |         |                              |        |
| <i>Fam3c</i>   |               |         | Fam3c   |                              |        |
| <i>Fam45a</i>  |               |         | Fam45a  |                              |        |
| <i>Fam46a</i>  |               |         | Fam46a  |                              | Fam46a |
| <i>Fam46b</i>  |               | Fam46b  |         |                              |        |
| <i>Fam46c</i>  |               | Fam46c  | Fam46c  |                              |        |
| <i>Fam46d</i>  |               | Fam46d  |         |                              |        |
| <i>Fam47e</i>  |               | Fam47e  | Fam47e  |                              |        |
| <i>Fam50a</i>  | Fam50a        |         |         |                              |        |
| <i>Fam50b</i>  |               | Fam50b  |         |                              |        |
| <i>Fam53c</i>  |               | Fam53c  | Fam53c  |                              |        |
| <i>Fam57a</i>  | Fam57a        |         | Fam57a  |                              |        |
| <i>Fam57b</i>  |               | Fam57b  | Fam57b  |                              |        |
| <i>Fam58b</i>  |               | Fam58b  | Fam58b  |                              |        |
| <i>Fam60a</i>  |               |         | Fam60a  |                              |        |
| <i>Fam63b</i>  |               | Fam63b  | Fam63b  |                              |        |
| <i>Fam64a</i>  |               |         | Fam64a  |                              |        |
| <i>Fam65b</i>  |               | Fam65b  |         |                              |        |
| <i>Fam69a</i>  |               |         | Fam69a  |                              |        |
| <i>Fam71a</i>  |               |         | Fam71a  |                              |        |
| <i>Fam71e2</i> |               | Fam71e2 | Fam71e2 |                              |        |
| <i>Fam71f2</i> |               |         | Fam71f2 |                              |        |
| <i>Fam73a</i>  |               | Fam73a  |         |                              |        |
| <i>Fam73b</i>  |               |         | Fam73b  |                              | Fam73b |
| <i>Fam81a</i>  |               | Fam81a  |         | Fam81a                       |        |
| <i>Fam83a</i>  | Fam83a        | Fam83a  |         |                              |        |
| <i>Fam83b</i>  | Fam83b        | Fam83b  | Fam83b  |                              |        |
| <i>Fam83d</i>  | Fam83d        |         | Fam83d  |                              |        |
| <i>Fam83e</i>  |               | Fam83e  |         |                              |        |
| <i>Fam83g</i>  |               | Fam83g  |         |                              |        |
| <i>Fam84a</i>  |               |         | Fam84a  |                              |        |
| <i>Fam84b</i>  |               | Fam84b  |         |                              |        |
| <i>Fam92a</i>  |               | Fam92a  | Fam92a  |                              |        |
| <i>Fam92b</i>  | Fam92b        | Fam92b  |         |                              |        |
| <i>Fam96a</i>  | Fam96a        | Fam96a  | Fam96a  |                              |        |
| <i>Fam98c</i>  |               | Fam98c  | Fam98c  |                              |        |
| <i>Fan1</i>    | Fan1          |         |         |                              |        |
| <i>Fanca</i>   |               |         | Fanca   |                              |        |
| <i>Fanfb</i>   |               | Fanfb   |         |                              |        |
| <i>Fanfd2</i>  |               |         | Fanfd2  |                              |        |
| <i>Fancg</i>   |               |         | Fancg   |                              |        |
| <i>Fanci</i>   |               |         | Fanci   |                              |        |

Suppl. Table 1  
(60/234)

|                 | CHIP-Seq hits |         |          | Unique hits with interactors |        |
|-----------------|---------------|---------|----------|------------------------------|--------|
|                 | unstimulated  | Ac      | LPS      | Ac                           | LPS    |
| <i>Fancl</i>    |               | Fancl   | Fancl    |                              |        |
| <i>Fancm</i>    |               | Fancm   | Fancm    |                              |        |
| <i>Fank1</i>    |               | Fank1   |          |                              |        |
| <i>Far1</i>     |               |         | Far1     |                              |        |
| <i>Farp1</i>    |               | Farp1   |          |                              |        |
| <i>Farsa</i>    |               | Farsa   |          |                              |        |
| <i>Farsb</i>    |               | Farsb   |          |                              |        |
| <i>Fasl</i>     |               | Fasl    |          | Fasl                         |        |
| <i>Fastkd1</i>  | Fastkd1       |         |          |                              |        |
| <i>Fastkd2</i>  | Fastkd2       |         |          |                              |        |
| <i>Fastkd3</i>  |               | Fastkd3 |          |                              |        |
| <i>Fastkd5</i>  |               |         | Fastkd5  |                              |        |
| <i>Fat1</i>     |               | Fat1    |          |                              |        |
| <i>Fat4</i>     |               | Fat4    |          |                              |        |
| <i>Fate1</i>    |               | Fate1   |          |                              |        |
| <i>Fbf1</i>     | Fbf1          |         |          |                              |        |
| <i>Fblim1</i>   |               |         | Fblim1   |                              | Fblim1 |
| <i>Fbn2</i>     |               | Fbn2    |          |                              |        |
| <i>Fbrsl1</i>   | Fbrsl1        |         | Fbrsl1   |                              |        |
| <i>Fbxl12</i>   | Fbxl12        |         | Fbxl12   |                              |        |
| <i>Fbxl12os</i> |               |         | Fbxl12os |                              |        |
| <i>Fbxl14</i>   |               |         | Fbxl14   |                              | Fbxl14 |
| <i>Fbxl18</i>   |               |         | Fbxl18   |                              |        |
| <i>Fbxl2</i>    | Fbxl2         |         |          |                              |        |
| <i>Fbxl20</i>   | Fbxl20        |         | Fbxl20   |                              |        |
| <i>Fbxl22</i>   |               |         | Fbxl22   |                              |        |
| <i>Fbxl4</i>    |               |         | Fbxl4    |                              |        |
| <i>Fbxl6</i>    |               |         | Fbxl6    |                              |        |
| <i>Fbxl7</i>    |               | Fbxl7   |          |                              |        |
| <i>Fbxo10</i>   |               | Fbxo10  | Fbxo10   |                              |        |
| <i>Fbxo15</i>   |               |         | Fbxo15   |                              |        |
| <i>Fbxo16</i>   | Fbxo16        |         |          |                              |        |
| <i>Fbxo22</i>   |               | Fbxo22  | Fbxo22   |                              |        |
| <i>Fbxo24</i>   | Fbxo24        | Fbxo24  |          |                              |        |
| <i>Fbxo25</i>   |               |         | Fbxo25   |                              |        |
| <i>Fbxo30</i>   |               |         | Fbxo30   |                              | Fbxo30 |
| <i>Fbxo34</i>   | Fbxo34        | Fbxo34  |          |                              |        |
| <i>Fbxo36</i>   | Fbxo36        |         |          |                              |        |
| <i>Fbxo38</i>   | Fbxo38        |         | Fbxo38   |                              |        |
| <i>Fbxo43</i>   |               |         | Fbxo43   |                              | Fbxo43 |
| <i>Fbxo45</i>   |               |         | Fbxo45   |                              | Fbxo45 |
| <i>Fbxo46</i>   | Fbxo46        |         |          |                              |        |
| <i>Fbxo48</i>   |               | Fbxo48  |          |                              |        |
| <i>Fbxo5</i>    | Fbxo5         |         | Fbxo5    |                              |        |
| <i>Fbxo7</i>    | Fbxo7         |         |          |                              |        |
| <i>Fbxw10</i>   |               | Fbxw10  |          |                              |        |
| <i>Fbxw13</i>   |               | Fbxw13  |          |                              |        |
| <i>Fbxw2</i>    |               |         | Fbxw2    |                              |        |
| <i>Fbxw20</i>   |               | Fbxw20  |          |                              |        |

Suppl. Table 1  
(61/234)

|                | CHIP-Seq hits |               |                | Unique hits with interactors |              |
|----------------|---------------|---------------|----------------|------------------------------|--------------|
|                | unstimulated  | Ac            | LPS            | Ac                           | LPS          |
| <i>Fbxw21</i>  |               | <i>Fbxw21</i> | <i>Fbxw21</i>  |                              |              |
| <i>Fbxw22</i>  | <i>Fbxw22</i> | <i>Fbxw22</i> |                |                              |              |
| <i>Fbxw24</i>  |               | <i>Fbxw24</i> |                |                              |              |
| <i>Fbxw27</i>  | <i>Fbxw27</i> |               |                |                              |              |
| <i>Fbxw4</i>   |               |               | <i>Fbxw4</i>   |                              |              |
| <i>Fbxw5</i>   |               | <i>Fbxw5</i>  |                |                              |              |
| <i>Fbxw7</i>   |               | <i>Fbxw7</i>  |                |                              |              |
| <i>Fbxw8</i>   |               |               | <i>Fbxw8</i>   |                              |              |
| <i>Fbxw9</i>   |               |               | <i>Fbxw9</i>   |                              |              |
| <i>Fcer1a</i>  |               |               | <i>Fcer1a</i>  |                              |              |
| <i>Fcer1g</i>  |               |               | <i>Fcer1g</i>  |                              |              |
| <i>Fcer2a</i>  |               |               | <i>Fcer2a</i>  |                              |              |
| <i>Fcgr1</i>   |               |               | <i>Fcgr1</i>   |                              |              |
| <i>Fcgr2b</i>  | <i>Fcgr2b</i> | <i>Fcgr2b</i> | <i>Fcgr2b</i>  |                              |              |
| <i>Fcgr3</i>   |               |               | <i>Fcgr3</i>   |                              |              |
| <i>Fcgr4</i>   |               | <i>Fcgr4</i>  |                |                              |              |
| <i>Fcgrt</i>   |               |               | <i>Fcgrt</i>   |                              |              |
| <i>Fcho1</i>   |               | <i>Fcho1</i>  |                |                              |              |
| <i>Fchsd2</i>  | <i>Fchsd2</i> | <i>Fchsd2</i> |                |                              |              |
| <i>Fcrl1</i>   | <i>Fcrl1</i>  | <i>Fcrl1</i>  |                |                              |              |
| <i>Fcrl5</i>   |               | <i>Fcrl5</i>  |                |                              |              |
| <i>Fcrl6</i>   | <i>Fcrl6</i>  |               |                |                              |              |
| <i>Fcrla</i>   |               | <i>Fcrla</i>  |                |                              |              |
| <i>Fdft1</i>   |               | <i>Fdft1</i>  |                |                              |              |
| <i>Fdps</i>    |               | <i>Fdps</i>   | <i>Fdps</i>    |                              |              |
| <i>Fdx1l</i>   |               |               | <i>Fdx1l</i>   |                              |              |
| <i>Fdxacb1</i> |               |               | <i>Fdxacb1</i> |                              |              |
| <i>Fdxr</i>    |               | <i>Fdxr</i>   |                |                              |              |
| <i>Fech</i>    |               | <i>Fech</i>   | <i>Fech</i>    |                              |              |
| <i>Fem1a</i>   |               |               | <i>Fem1a</i>   |                              |              |
| <i>Fem1b</i>   |               |               | <i>Fem1b</i>   |                              | <i>Fem1b</i> |
| <i>Fem1c</i>   |               |               | <i>Fem1c</i>   |                              |              |
| <i>Fen1</i>    |               |               | <i>Fen1</i>    |                              |              |
| <i>Fendrr</i>  | <i>Fendrr</i> | <i>Fendrr</i> | <i>Fendrr</i>  |                              |              |
| <i>Fer1l5</i>  | <i>Fer1l5</i> |               |                |                              |              |
| <i>Ferd3l</i>  | <i>Ferd3l</i> |               |                |                              |              |
| <i>Fermt3</i>  |               |               | <i>Fermt3</i>  |                              |              |
| <i>Fes</i>     |               | <i>Fes</i>    |                |                              |              |
| <i>Fez2</i>    |               | <i>Fez2</i>   |                |                              |              |
| <i>Fezf1</i>   | <i>Fezf1</i>  | <i>Fezf1</i>  | <i>Fezf1</i>   |                              |              |
| <i>Ffar3</i>   | <i>Ffar3</i>  |               |                |                              |              |
| <i>Ffar4</i>   | <i>Ffar4</i>  | <i>Ffar4</i>  | <i>Ffar4</i>   |                              |              |
| <i>Fgb</i>     |               |               | <i>Fgb</i>     |                              |              |
| <i>Fgd4</i>    | <i>Fgd4</i>   |               |                |                              |              |
| <i>Fgd6</i>    |               |               | <i>Fgd6</i>    |                              | <i>Fgd6</i>  |
| <i>Fgf1</i>    |               | <i>Fgf1</i>   |                |                              |              |
| <i>Fgf10</i>   | <i>Fgf10</i>  |               |                |                              |              |
| <i>Fgf12</i>   |               | <i>Fgf12</i>  |                |                              |              |
| <i>Fgf13</i>   |               |               | <i>Fgf13</i>   |                              | <i>Fgf13</i> |

Suppl. Table 1  
(62/234)

|                 | CHIP-Seq hits   |                |                | Unique hits with interactors |             |
|-----------------|-----------------|----------------|----------------|------------------------------|-------------|
|                 | unstimulated    | Ac             | LPS            | Ac                           | LPS         |
| <i>Fgf14</i>    |                 |                | <i>Fgf14</i>   |                              |             |
| <i>Fgf15</i>    |                 | <i>Fgf15</i>   |                |                              |             |
| <i>Fgf18</i>    |                 | <i>Fgf18</i>   | <i>Fgf18</i>   |                              |             |
| <i>Fgf20</i>    | <i>Fgf20</i>    | <i>Fgf20</i>   | <i>Fgf20</i>   |                              |             |
| <i>Fgf5</i>     |                 |                | <i>Fgf5</i>    |                              | <i>Fgf5</i> |
| <i>Fgf6</i>     |                 |                | <i>Fgf6</i>    |                              |             |
| <i>Fgfr1op</i>  |                 | <i>Fgfr1op</i> | <i>Fgfr1op</i> |                              |             |
| <i>Fgfr1op2</i> | <i>Fgfr1op2</i> |                |                |                              |             |
| <i>Fgfr3</i>    |                 |                | <i>Fgfr3</i>   |                              |             |
| <i>Fgl1</i>     |                 | <i>Fgl1</i>    |                |                              |             |
| <i>Fgr</i>      | <i>Fgr</i>      | <i>Fgr</i>     | <i>Fgr</i>     |                              |             |
| <i>Fhdc1</i>    |                 | <i>Fhdc1</i>   |                |                              |             |
| <i>Fhit</i>     |                 |                | <i>Fhit</i>    |                              |             |
| <i>Fhitos</i>   | <i>Fhitos</i>   |                |                |                              |             |
| <i>Fhl1</i>     |                 |                | <i>Fhl1</i>    |                              |             |
| <i>Fhl2</i>     |                 |                | <i>Fhl2</i>    |                              |             |
| <i>Fhod3</i>    |                 | <i>Fhod3</i>   |                |                              |             |
| <i>Fibin</i>    |                 | <i>Fibin</i>   |                |                              |             |
| <i>Fibp</i>     | <i>Fibp</i>     | <i>Fibp</i>    |                |                              |             |
| <i>Ficd</i>     |                 |                | <i>Ficd</i>    |                              | <i>Ficd</i> |
| <i>Figla</i>    | <i>Figla</i>    | <i>Figla</i>   | <i>Figla</i>   |                              |             |
| <i>Filip1l</i>  |                 | <i>Filip1l</i> | <i>Filip1l</i> |                              |             |
| <i>Fis1</i>     | <i>Fis1</i>     |                |                |                              |             |
| <i>Fjx1</i>     |                 | <i>Fjx1</i>    |                |                              |             |
| <i>Fkbp10</i>   |                 |                | <i>Fkbp10</i>  |                              |             |
| <i>Fkbp11</i>   |                 |                | <i>Fkbp11</i>  |                              |             |
| <i>Fkbp15</i>   |                 | <i>Fkbp15</i>  | <i>Fkbp15</i>  |                              |             |
| <i>Fkbp1a</i>   |                 | <i>Fkbp1a</i>  |                |                              |             |
| <i>Fkbp3</i>    |                 | <i>Fkbp3</i>   |                |                              |             |
| <i>Fkbp4</i>    |                 |                | <i>Fkbp4</i>   |                              |             |
| <i>Fkbp5</i>    |                 | <i>Fkbp5</i>   |                |                              |             |
| <i>Fkbp7</i>    |                 | <i>Fkbp7</i>   | <i>Fkbp7</i>   |                              |             |
| <i>Fkbp9</i>    |                 | <i>Fkbp9</i>   |                | <i>Fkbp9</i>                 |             |
| <i>Fkbpl</i>    |                 | <i>Fkbpl</i>   |                |                              |             |
| <i>Flad1</i>    |                 | <i>Flad1</i>   |                |                              |             |
| <i>Flcn</i>     | <i>Flcn</i>     | <i>Flcn</i>    |                |                              |             |
| <i>Flg2</i>     |                 | <i>Flg2</i>    |                |                              |             |
| <i>Flii</i>     |                 | <i>Flii</i>    |                |                              |             |
| <i>Flnc</i>     | <i>Flnc</i>     | <i>Flnc</i>    | <i>Flnc</i>    |                              |             |
| <i>Flot2</i>    |                 | <i>Flot2</i>   |                | <i>Flot2</i>                 |             |
| <i>Flrt1</i>    |                 | <i>Flrt1</i>   |                | <i>Flrt1</i>                 |             |
| <i>Flrt2</i>    | <i>Flrt2</i>    | <i>Flrt2</i>   |                |                              |             |
| <i>Flt1</i>     |                 |                | <i>Flt1</i>    |                              |             |
| <i>Flt3</i>     |                 |                | <i>Flt3</i>    |                              |             |
| <i>Flywch2</i>  | <i>Flywch2</i>  |                |                |                              |             |
| <i>Fmn1</i>     | <i>Fmn1</i>     |                | <i>Fmn1</i>    |                              |             |
| <i>Fmnl3</i>    |                 |                | <i>Fmnl3</i>   |                              |             |
| <i>Fmo4</i>     | <i>Fmo4</i>     | <i>Fmo4</i>    |                |                              |             |
| <i>Fmo5</i>     |                 |                | <i>Fmo5</i>    |                              | <i>Fmo5</i> |

Suppl. Table 1  
(63/234)

|                | ChIP-Seq hits  |               |                | Unique hits with interactors |              |
|----------------|----------------|---------------|----------------|------------------------------|--------------|
|                | unstimulated   | Ac            | LPS            | Ac                           | LPS          |
| <i>Fmo6</i>    |                |               | <i>Fmo6</i>    |                              |              |
| <i>Fmr1os</i>  |                |               | <i>Fmr1os</i>  |                              |              |
| <i>Fn1</i>     |                |               | <i>Fn1</i>     |                              | <i>Fn1</i>   |
| <i>Fnbp1</i>   |                | <i>Fnbp1</i>  |                | <i>Fnbp1</i>                 |              |
| <i>Fnbp1l</i>  |                | <i>Fnbp1l</i> |                | <i>Fnbp1l</i>                |              |
| <i>Fndc3a</i>  | <i>Fndc3a</i>  |               |                |                              |              |
| <i>Fndc3b</i>  | <i>Fndc3b</i>  |               |                |                              |              |
| <i>Fndc4</i>   |                |               | <i>Fndc4</i>   |                              |              |
| <i>Fndc5</i>   |                |               | <i>Fndc5</i>   |                              |              |
| <i>Fndc7</i>   |                |               | <i>Fndc7</i>   |                              |              |
| <i>Fnip1</i>   |                | <i>Fnip1</i>  | <i>Fnip1</i>   |                              |              |
| <i>Fnta</i>    | <i>Fnta</i>    | <i>Fnta</i>   |                |                              |              |
| <i>Fntb</i>    |                |               | <i>Fntb</i>    |                              |              |
| <i>Focad</i>   |                |               | <i>Focad</i>   |                              |              |
| <i>Folr2</i>   |                |               | <i>Folr2</i>   |                              |              |
| <i>Fopnl</i>   | <i>Fopnl</i>   |               |                |                              |              |
| <i>Fos</i>     |                | <i>Fos</i>    |                | <i>Fos</i>                   |              |
| <i>Fosb</i>    | <i>Fosb</i>    | <i>Fosb</i>   |                |                              |              |
| <i>Fosl1</i>   |                | <i>Fosl1</i>  |                | <i>Fosl1</i>                 |              |
| <i>Fosl2</i>   |                |               | <i>Fosl2</i>   |                              |              |
| <i>Foxa1</i>   | <i>Foxa1</i>   |               |                |                              |              |
| <i>Foxa3</i>   |                |               | <i>Foxa3</i>   |                              |              |
| <i>Foxb1</i>   | <i>Foxb1</i>   |               |                |                              |              |
| <i>Foxc1</i>   | <i>Foxc1</i>   | <i>Foxc1</i>  | <i>Foxc1</i>   |                              |              |
| <i>Foxd2</i>   |                |               | <i>Foxd2</i>   |                              |              |
| <i>Foxe1</i>   |                | <i>Foxe1</i>  |                |                              |              |
| <i>Foxe3</i>   | <i>Foxe3</i>   |               |                |                              |              |
| <i>Foxg1</i>   |                | <i>Foxg1</i>  |                |                              |              |
| <i>Foxh1</i>   |                |               | <i>Foxh1</i>   |                              |              |
| <i>Foxi1</i>   |                |               | <i>Foxi1</i>   |                              |              |
| <i>Foxi2</i>   | <i>Foxi2</i>   | <i>Foxi2</i>  |                |                              |              |
| <i>Foxj3</i>   |                | <i>Foxj3</i>  |                | <i>Foxj3</i>                 |              |
| <i>Foxk1</i>   |                |               | <i>Foxk1</i>   |                              | <i>Foxk1</i> |
| <i>Foxl1</i>   |                |               | <i>Foxl1</i>   |                              | <i>Foxl1</i> |
| <i>Foxn1</i>   | <i>Foxn1</i>   |               |                |                              |              |
| <i>Foxn3</i>   |                | <i>Foxn3</i>  | <i>Foxn3</i>   |                              |              |
| <i>Foxo1</i>   |                | <i>Foxo1</i>  |                | <i>Foxo1</i>                 |              |
| <i>Foxo4</i>   |                | <i>Foxo4</i>  |                |                              |              |
| <i>Foxp2</i>   | <i>Foxp2</i>   |               | <i>Foxp2</i>   |                              |              |
| <i>Foxp4</i>   |                | <i>Foxp4</i>  |                |                              |              |
| <i>Foxr1</i>   |                | <i>Foxr1</i>  | <i>Foxr1</i>   |                              |              |
| <i>Foxred2</i> |                |               | <i>Foxred2</i> |                              |              |
| <i>Foxs1</i>   | <i>Foxs1</i>   |               |                |                              |              |
| <i>Fpr1</i>    |                | <i>Fpr1</i>   |                |                              |              |
| <i>Fpr-rs3</i> | <i>Fpr-rs3</i> |               |                |                              |              |
| <i>Fpr-rs4</i> |                |               | <i>Fpr-rs4</i> |                              |              |
| <i>Frat1</i>   |                | <i>Frat1</i>  | <i>Frat1</i>   |                              |              |
| <i>Frat2</i>   |                |               | <i>Frat2</i>   |                              |              |
| <i>Frem3</i>   |                |               | <i>Frem3</i>   |                              |              |

Suppl. Table 1  
(64/234)

|                 | ChIP-Seq hits |               |                 | Unique hits with interactors |              |
|-----------------|---------------|---------------|-----------------|------------------------------|--------------|
|                 | unstimulated  | Ac            | LPS             | Ac                           | LPS          |
| <i>Frg1</i>     |               |               | <i>Frg1</i>     |                              | <i>Frg1</i>  |
| <i>Frk</i>      | <i>Frk</i>    |               |                 |                              |              |
| <i>Frmd4a</i>   |               | <i>Frmd4a</i> | <i>Frmd4a</i>   |                              |              |
| <i>Frmd4b</i>   |               | <i>Frmd4b</i> | <i>Frmd4b</i>   |                              |              |
| <i>Frmd5</i>    |               | <i>Frmd5</i>  |                 |                              |              |
| <i>Frmpd1os</i> |               |               | <i>Frmpd1os</i> |                              |              |
| <i>Frmpd3</i>   |               | <i>Frmpd3</i> |                 |                              |              |
| <i>Frrs1</i>    |               |               | <i>Frrs1</i>    |                              | <i>Frrs1</i> |
| <i>Frs2</i>     |               |               | <i>Frs2</i>     |                              |              |
| <i>Frs3</i>     |               | <i>Frs3</i>   |                 |                              |              |
| <i>Fry</i>      |               | <i>Fry</i>    | <i>Fry</i>      |                              |              |
| <i>Frzb</i>     |               | <i>Frzb</i>   | <i>Frzb</i>     |                              |              |
| <i>Fsbp</i>     | <i>Fsbp</i>   |               |                 |                              |              |
| <i>Fscb</i>     |               | <i>Fscb</i>   | <i>Fscb</i>     |                              |              |
| <i>Fsd1</i>     |               | <i>Fsd1</i>   |                 | <i>Fsd1</i>                  |              |
| <i>Fshb</i>     |               |               | <i>Fshb</i>     |                              |              |
| <i>Fshr</i>     |               | <i>Fshr</i>   | <i>Fshr</i>     |                              |              |
| <i>Fsip1</i>    | <i>Fsip1</i>  |               |                 |                              |              |
| <i>Fstl1</i>    |               | <i>Fstl1</i>  |                 | <i>Fstl1</i>                 |              |
| <i>Ftcd</i>     | <i>Ftcd</i>   |               |                 |                              |              |
| <i>Fto</i>      | <i>Fto</i>    |               |                 |                              |              |
| <i>Ftsj3</i>    |               |               | <i>Ftsj3</i>    |                              |              |
| <i>Ftx</i>      |               |               | <i>Ftx</i>      |                              |              |
| <i>Fubp3</i>    |               | <i>Fubp3</i>  |                 |                              |              |
| <i>Fuca1</i>    |               |               | <i>Fuca1</i>    |                              |              |
| <i>Fuk</i>      |               | <i>Fuk</i>    | <i>Fuk</i>      |                              |              |
| <i>Fundc2</i>   |               |               | <i>Fundc2</i>   |                              |              |
| <i>Fuom</i>     |               |               | <i>Fuom</i>     |                              |              |
| <i>Fus</i>      |               |               | <i>Fus</i>      |                              | <i>Fus</i>   |
| <i>Fut4</i>     |               |               | <i>Fut4</i>     |                              | <i>Fut4</i>  |
| <i>Fut8</i>     |               | <i>Fut8</i>   | <i>Fut8</i>     |                              |              |
| <i>Fuz</i>      |               |               | <i>Fuz</i>      |                              |              |
| <i>Fv1</i>      |               |               | <i>Fv1</i>      |                              |              |
| <i>Fxn</i>      |               | <i>Fxn</i>    |                 | <i>Fxn</i>                   |              |
| <i>Fxr2</i>     |               |               | <i>Fxr2</i>     |                              |              |
| <i>Fxyd1</i>    | <i>Fxyd1</i>  |               |                 |                              |              |
| <i>Fxyd2</i>    |               | <i>Fxyd2</i>  |                 |                              |              |
| <i>Fxyd3</i>    |               | <i>Fxyd3</i>  |                 |                              |              |
| <i>Fxyd4</i>    | <i>Fxyd4</i>  |               |                 |                              |              |
| <i>Fyb</i>      |               | <i>Fyb</i>    |                 |                              |              |
| <i>Fyn</i>      |               | <i>Fyn</i>    | <i>Fyn</i>      |                              |              |
| <i>Fyttd1</i>   | <i>Fyttd1</i> |               |                 |                              |              |
| <i>Fzd1</i>     |               |               | <i>Fzd1</i>     |                              | <i>Fzd1</i>  |
| <i>Fzd2</i>     |               | <i>Fzd2</i>   |                 | <i>Fzd2</i>                  |              |
| <i>Fzd4</i>     |               |               | <i>Fzd4</i>     |                              |              |
| <i>Fzd5</i>     |               |               | <i>Fzd5</i>     |                              |              |
| <i>Fzd7</i>     |               | <i>Fzd7</i>   | <i>Fzd7</i>     |                              |              |
| <i>Fzd9</i>     | <i>Fzd9</i>   |               | <i>Fzd9</i>     |                              |              |
| <i>Fzr1</i>     |               |               | <i>Fzr1</i>     |                              |              |



Suppl. Table 1  
(65/234)

|                      | CHIP-Seq hits    |                      |                      | Unique hits with interactors |                |
|----------------------|------------------|----------------------|----------------------|------------------------------|----------------|
|                      | unstimulated     | Ac                   | LPS                  | Ac                           | LPS            |
| <i>G0s2</i>          |                  | <i>G0s2</i>          |                      |                              |                |
| <i>G3bp2</i>         |                  |                      | <i>G3bp2</i>         |                              |                |
| <i>G530011O06Rik</i> |                  | <i>G530011O06Rik</i> |                      |                              |                |
| <i>G630055G22Rik</i> |                  |                      | <i>G630055G22Rik</i> |                              |                |
| <i>G630064G18Rik</i> |                  |                      | <i>G630064G18Rik</i> |                              |                |
| <i>G630090E17Rik</i> |                  | <i>G630090E17Rik</i> |                      |                              |                |
| <i>G630093K05Rik</i> |                  | <i>G630093K05Rik</i> |                      |                              |                |
| <i>G6bos</i>         | <i>G6bos</i>     | <i>G6bos</i>         | <i>G6bos</i>         |                              |                |
| <i>G6pc2</i>         | <i>G6pc2</i>     | <i>G6pc2</i>         |                      |                              |                |
| <i>Gaa</i>           |                  | <i>Gaa</i>           | <i>Gaa</i>           |                              |                |
| <i>Gab1</i>          |                  | <i>Gab1</i>          | <i>Gab1</i>          |                              |                |
| <i>Gab2</i>          |                  | <i>Gab2</i>          |                      |                              |                |
| <i>Gabarapl1</i>     | <i>Gabarapl1</i> | <i>Gabarapl1</i>     | <i>Gabarapl1</i>     |                              |                |
| <i>Gabarapl2</i>     |                  | <i>Gabarapl2</i>     | <i>Gabarapl2</i>     |                              |                |
| <i>Gabra1</i>        | <i>Gabra1</i>    |                      | <i>Gabra1</i>        |                              |                |
| <i>Gabra5</i>        |                  |                      | <i>Gabra5</i>        |                              |                |
| <i>Gabrb1</i>        |                  |                      | <i>Gabrb1</i>        |                              |                |
| <i>Gabrg2</i>        |                  | <i>Gabrg2</i>        |                      |                              |                |
| <i>Gabrg3</i>        |                  | <i>Gabrg3</i>        |                      |                              |                |
| <i>Gabrq</i>         |                  |                      | <i>Gabrq</i>         |                              |                |
| <i>Gabrr1</i>        |                  | <i>Gabrr1</i>        |                      |                              |                |
| <i>Gabrr2</i>        |                  | <i>Gabrr2</i>        | <i>Gabrr2</i>        |                              |                |
| <i>Gabrr3</i>        |                  | <i>Gabrr3</i>        |                      |                              |                |
| <i>Gad1</i>          | <i>Gad1</i>      |                      |                      |                              |                |
| <i>Gad2</i>          |                  |                      | <i>Gad2</i>          |                              | <i>Gad2</i>    |
| <i>Gadd45b</i>       | <i>Gadd45b</i>   | <i>Gadd45b</i>       | <i>Gadd45b</i>       |                              |                |
| <i>Gadd45g</i>       |                  | <i>Gadd45g</i>       | <i>Gadd45g</i>       |                              |                |
| <i>Gadd45gip1</i>    |                  | <i>Gadd45gip1</i>    | <i>Gadd45gip1</i>    |                              |                |
| <i>Gak</i>           | <i>Gak</i>       | <i>Gak</i>           | <i>Gak</i>           |                              |                |
| <i>Gal3st3</i>       |                  |                      | <i>Gal3st3</i>       |                              | <i>Gal3st3</i> |
| <i>Gale</i>          |                  |                      | <i>Gale</i>          |                              |                |
| <i>Galk1</i>         |                  |                      | <i>Galk1</i>         |                              |                |
| <i>Galnt1</i>        |                  |                      | <i>Galnt1</i>        |                              |                |
| <i>Galnt10</i>       |                  | <i>Galnt10</i>       |                      |                              |                |
| <i>Galnt11</i>       |                  | <i>Galnt11</i>       |                      |                              |                |
| <i>Galnt15</i>       |                  | <i>Galnt15</i>       |                      | <i>Galnt15</i>               |                |
| <i>Galnt16</i>       |                  | <i>Galnt16</i>       |                      |                              |                |
| <i>Galnt3</i>        |                  |                      | <i>Galnt3</i>        |                              | <i>Galnt3</i>  |
| <i>Galnt5</i>        | <i>Galnt5</i>    |                      |                      |                              |                |
| <i>Galnt6</i>        | <i>Galnt6</i>    |                      |                      |                              |                |
| <i>Galnt7</i>        | <i>Galnt7</i>    |                      |                      |                              |                |
| <i>Galntl5</i>       |                  | <i>Galntl5</i>       |                      |                              |                |
| <i>Galr1</i>         | <i>Galr1</i>     | <i>Galr1</i>         |                      |                              |                |
| <i>Galr2</i>         | <i>Galr2</i>     | <i>Galr2</i>         | <i>Galr2</i>         |                              |                |
| <i>Galr3</i>         |                  | <i>Galr3</i>         |                      |                              |                |
| <i>Galt</i>          | <i>Galt</i>      | <i>Galt</i>          |                      |                              |                |
| <i>Ganab</i>         |                  | <i>Ganab</i>         |                      |                              |                |
| <i>Gapvd1</i>        |                  |                      | <i>Gapvd1</i>        |                              |                |
| <i>Gar1</i>          |                  | <i>Gar1</i>          |                      |                              |                |

Suppl. Table 1  
(66/234)

|                | CHIP-Seq hits |         |         | Unique hits with interactors |       |
|----------------|---------------|---------|---------|------------------------------|-------|
|                | unstimulated  | Ac      | LPS     | Ac                           | LPS   |
| <i>Garnl3</i>  |               |         | Garnl3  |                              |       |
| <i>Gars</i>    |               |         | Gars    |                              |       |
| <i>Gart</i>    |               |         | Gart    |                              |       |
| <i>Gas2</i>    | Gas2          | Gas2    |         |                              |       |
| <i>Gas2l1</i>  |               | Gas2l1  |         |                              |       |
| <i>Gas2l2</i>  |               |         | Gas2l2  |                              |       |
| <i>Gas2l3</i>  |               | Gas2l3  | Gas2l3  |                              |       |
| <i>Gas5</i>    |               | Gas5    |         |                              |       |
| <i>Gas6</i>    |               | Gas6    |         | Gas6                         |       |
| <i>Gas8</i>    | Gas8          | Gas8    | Gas8    |                              |       |
| <i>Gata3</i>   |               |         | Gata3   |                              |       |
| <i>Gata4</i>   |               |         | Gata4   |                              | Gata4 |
| <i>Gata5</i>   |               | Gata5   |         | Gata5                        |       |
| <i>Gata5os</i> |               | Gata5os |         |                              |       |
| <i>Gatad1</i>  |               | Gatad1  |         |                              |       |
| <i>Gatad2a</i> |               |         | Gatad2a |                              |       |
| <i>Gatad2b</i> | Gatad2b       |         |         |                              |       |
| <i>Gatc</i>    | Gatc          |         |         |                              |       |
| <i>Gba</i>     |               |         | Gba     |                              |       |
| <i>Gba2</i>    |               | Gba2    |         | Gba2                         |       |
| <i>Gbgt1</i>   |               | Gbgt1   |         |                              |       |
| <i>Gbp11</i>   |               | Gbp11   | Gbp11   |                              |       |
| <i>Gbp2b</i>   |               |         | Gbp2b   |                              |       |
| <i>Gbp3</i>    |               |         | Gbp3    |                              |       |
| <i>Gbp5</i>    | Gbp5          | Gbp5    | Gbp5    |                              |       |
| <i>Gbx2</i>    | Gbx2          |         | Gbx2    |                              |       |
| <i>Gc</i>      | Gc            |         |         |                              |       |
| <i>Gcc2</i>    |               | Gcc2    |         |                              |       |
| <i>Gcfc2</i>   |               |         | Gcfc2   |                              |       |
| <i>Gcg</i>     |               | Gcg     |         | Gcg                          |       |
| <i>Gcgr</i>    |               | Gcgr    |         |                              |       |
| <i>Gckr</i>    |               |         | Gckr    |                              |       |
| <i>Gclc</i>    |               |         | Gclc    |                              |       |
| <i>Gclm</i>    |               | Gclm    |         | Gclm                         |       |
| <i>Gcm1</i>    | Gcm1          | Gcm1    |         |                              |       |
| <i>Gcnt3</i>   |               | Gcnt3   |         |                              |       |
| <i>Gcnt4</i>   |               | Gcnt4   |         | Gcnt4                        |       |
| <i>Gcnt7</i>   | Gcnt7         |         | Gcnt7   |                              |       |
| <i>Gdap1</i>   | Gdap1         |         | Gdap1   |                              |       |
| <i>Gdap10</i>  |               | Gdap10  | Gdap10  |                              |       |
| <i>Gdap1l1</i> |               | Gdap1l1 |         |                              |       |
| <i>Gdap2</i>   | Gdap2         | Gdap2   | Gdap2   |                              |       |
| <i>Gde1</i>    | Gde1          |         | Gde1    |                              |       |
| <i>Gdf1</i>    |               | Gdf1    |         |                              |       |
| <i>Gdf15</i>   | Gdf15         |         |         |                              |       |
| <i>Gdf7</i>    |               | Gdf7    |         |                              |       |
| <i>Gdf9</i>    |               | Gdf9    |         |                              |       |
| <i>Gdi1</i>    |               | Gdi1    |         |                              |       |
| <i>Gdi2</i>    | Gdi2          | Gdi2    | Gdi2    |                              |       |

Suppl. Table 1  
(67/234)

|               | CHIP-Seq hits |               |               | Unique hits with interactors |             |
|---------------|---------------|---------------|---------------|------------------------------|-------------|
|               | unstimulated  | Ac            | LPS           | Ac                           | LPS         |
| <i>Gdnf</i>   |               | <i>Gdnf</i>   | <i>Gdnf</i>   |                              |             |
| <i>Gdpd1</i>  |               | <i>Gdpd1</i>  | <i>Gdpd1</i>  |                              |             |
| <i>Gdpd3</i>  |               |               | <i>Gdpd3</i>  |                              |             |
| <i>Gdpd4</i>  |               |               | <i>Gdpd4</i>  |                              |             |
| <i>Gdpd5</i>  |               |               | <i>Gdpd5</i>  |                              |             |
| <i>Gemin2</i> |               |               | <i>Gemin2</i> |                              |             |
| <i>Gemin5</i> |               |               | <i>Gemin5</i> |                              |             |
| <i>Gemin6</i> |               |               | <i>Gemin6</i> |                              |             |
| <i>Gemin7</i> | <i>Gemin7</i> | <i>Gemin7</i> | <i>Gemin7</i> |                              |             |
| <i>Gemin8</i> | <i>Gemin8</i> | <i>Gemin8</i> | <i>Gemin8</i> |                              |             |
| <i>Gen1</i>   |               | <i>Gen1</i>   | <i>Gen1</i>   |                              |             |
| <i>Get4</i>   |               | <i>Get4</i>   |               |                              |             |
| <i>Gfi1</i>   |               | <i>Gfi1</i>   | <i>Gfi1</i>   |                              |             |
| <i>Gfm1</i>   |               |               | <i>Gfm1</i>   |                              |             |
| <i>Gfod1</i>  | <i>Gfod1</i>  |               |               |                              |             |
| <i>Gfra1</i>  | <i>Gfra1</i>  |               |               |                              |             |
| <i>Gfra3</i>  |               | <i>Gfra3</i>  |               |                              |             |
| <i>Gfra4</i>  | <i>Gfra4</i>  |               |               |                              |             |
| <i>Gfy</i>    | <i>Gfy</i>    |               |               |                              |             |
| <i>Gga1</i>   | <i>Gga1</i>   |               |               |                              |             |
| <i>Gga3</i>   |               |               | <i>Gga3</i>   |                              |             |
| <i>Ggct</i>   |               |               | <i>Ggct</i>   |                              |             |
| <i>Ggh</i>    |               |               | <i>Ggh</i>    |                              |             |
| <i>Ggn</i>    |               | <i>Ggn</i>    |               |                              |             |
| <i>Ggnbp1</i> | <i>Ggnbp1</i> |               |               |                              |             |
| <i>Ggnbp2</i> |               |               | <i>Ggnbp2</i> |                              |             |
| <i>Ggt5</i>   |               |               | <i>Ggt5</i>   |                              |             |
| <i>Ghdc</i>   |               |               | <i>Ghdc</i>   |                              |             |
| <i>Ghitm</i>  |               | <i>Ghitm</i>  |               |                              |             |
| <i>Ghrh</i>   |               |               | <i>Ghrh</i>   |                              |             |
| <i>Ghsr</i>   |               | <i>Ghsr</i>   |               |                              |             |
| <i>Gigyf1</i> | <i>Gigyf1</i> |               |               |                              |             |
| <i>Gimap5</i> |               | <i>Gimap5</i> |               |                              |             |
| <i>Gimap7</i> |               | <i>Gimap7</i> |               |                              |             |
| <i>Gimap9</i> | <i>Gimap9</i> | <i>Gimap9</i> | <i>Gimap9</i> |                              |             |
| <i>Gins2</i>  | <i>Gins2</i>  |               |               |                              |             |
| <i>Gip</i>    |               | <i>Gip</i>    |               |                              |             |
| <i>Gipc1</i>  |               | <i>Gipc1</i>  |               | <i>Gipc1</i>                 |             |
| <i>Gipc2</i>  |               | <i>Gipc2</i>  |               |                              |             |
| <i>Gipc3</i>  | <i>Gipc3</i>  |               |               |                              |             |
| <i>Gipr</i>   | <i>Gipr</i>   |               | <i>Gipr</i>   |                              |             |
| <i>Git2</i>   | <i>Git2</i>   |               | <i>Git2</i>   |                              |             |
| <i>Gja1</i>   |               | <i>Gja1</i>   |               |                              |             |
| <i>Gja3</i>   |               |               | <i>Gja3</i>   |                              | <i>Gja3</i> |
| <i>Gja5</i>   | <i>Gja5</i>   |               | <i>Gja5</i>   |                              |             |
| <i>Gjb3</i>   |               | <i>Gjb3</i>   |               |                              |             |
| <i>Gjb4</i>   |               | <i>Gjb4</i>   |               |                              |             |
| <i>Gjb6</i>   | <i>Gjb6</i>   |               |               |                              |             |
| <i>Gjc1</i>   |               | <i>Gjc1</i>   |               |                              |             |

Suppl. Table 1  
(68/234)

|                 | ChIP-Seq hits  |                 |                | Unique hits with interactors |              |
|-----------------|----------------|-----------------|----------------|------------------------------|--------------|
|                 | unstimulated   | Ac              | LPS            | Ac                           | LPS          |
| <i>Gjc3</i>     |                | <i>Gjc3</i>     |                | <i>Gjc3</i>                  |              |
| <i>Gjd2</i>     | <i>Gjd2</i>    |                 |                |                              |              |
| <i>Gjd3</i>     |                | <i>Gjd3</i>     |                |                              |              |
| <i>Gk5</i>      |                | <i>Gk5</i>      |                |                              |              |
| <i>Gkap1</i>    |                | <i>Gkap1</i>    | <i>Gkap1</i>   |                              |              |
| <i>Gkn1</i>     |                | <i>Gkn1</i>     |                |                              |              |
| <i>Gla</i>      |                | <i>Gla</i>      |                | <i>Gla</i>                   |              |
| <i>Glb1l</i>    |                | <i>Glb1l</i>    |                |                              |              |
| <i>Glb1l2</i>   |                | <i>Glb1l2</i>   |                |                              |              |
| <i>Gldc</i>     |                |                 | <i>Gldc</i>    |                              |              |
| <i>Glg1</i>     | <i>Glg1</i>    | <i>Glg1</i>     | <i>Glg1</i>    |                              |              |
| <i>Glipr1l2</i> |                | <i>Glipr1l2</i> |                |                              |              |
| <i>Glipr2</i>   |                |                 | <i>Glipr2</i>  |                              |              |
| <i>Glis1</i>    | <i>Glis1</i>   | <i>Glis1</i>    | <i>Glis1</i>   |                              |              |
| <i>Glis2</i>    |                | <i>Glis2</i>    |                |                              |              |
| <i>Glis3</i>    |                |                 | <i>Glis3</i>   |                              |              |
| <i>Glmn</i>     |                |                 | <i>Glmn</i>    |                              |              |
| <i>Gimp</i>     |                | <i>Gimp</i>     |                |                              |              |
| <i>Glod4</i>    |                | <i>Glod4</i>    |                | <i>Glod4</i>                 |              |
| <i>Glp1r</i>    | <i>Glp1r</i>   | <i>Glp1r</i>    |                |                              |              |
| <i>Glp2r</i>    | <i>Glp2r</i>   |                 |                |                              |              |
| <i>Ghra2</i>    |                |                 | <i>Ghra2</i>   |                              | <i>Ghra2</i> |
| <i>Ghra3</i>    |                |                 | <i>Ghra3</i>   |                              |              |
| <i>Ghra4</i>    |                | <i>Ghra4</i>    |                |                              |              |
| <i>Glrb</i>     |                |                 | <i>Glrb</i>    |                              |              |
| <i>Glrp1</i>    | <i>Glrp1</i>   |                 |                |                              |              |
| <i>Glrx2</i>    | <i>Glrx2</i>   | <i>Glrx2</i>    | <i>Glrx2</i>   |                              |              |
| <i>Gls</i>      |                | <i>Gls</i>      |                | <i>Gls</i>                   |              |
| <i>Gls2</i>     |                | <i>Gls2</i>     | <i>Gls2</i>    |                              |              |
| <i>Glt28d2</i>  |                | <i>Glt28d2</i>  |                |                              |              |
| <i>Glt8d1</i>   |                | <i>Glt8d1</i>   |                | <i>Glt8d1</i>                |              |
| <i>Glt8d2</i>   | <i>Glt8d2</i>  | <i>Glt8d2</i>   |                |                              |              |
| <i>Gltscr2</i>  | <i>Gltscr2</i> |                 | <i>Gltscr2</i> |                              |              |
| <i>Glud1</i>    | <i>Glud1</i>   |                 |                |                              |              |
| <i>Glul</i>     | <i>Glul</i>    | <i>Glul</i>     |                |                              |              |
| <i>Glyat</i>    |                | <i>Glyat</i>    |                |                              |              |
| <i>Glyatl3</i>  |                |                 | <i>Glyatl3</i> |                              |              |
| <i>Glyctk</i>   |                | <i>Glyctk</i>   |                | <i>Glyctk</i>                |              |
| <i>Gm10007</i>  |                | <i>Gm10007</i>  |                |                              |              |
| <i>Gm10024</i>  | <i>Gm10024</i> | <i>Gm10024</i>  | <i>Gm10024</i> |                              |              |
| <i>Gm10046</i>  | <i>Gm10046</i> |                 |                |                              |              |
| <i>Gm10052</i>  | <i>Gm10052</i> | <i>Gm10052</i>  |                |                              |              |
| <i>Gm10058</i>  | <i>Gm10058</i> | <i>Gm10058</i>  | <i>Gm10058</i> |                              |              |
| <i>Gm10081</i>  |                | <i>Gm10081</i>  |                |                              |              |
| <i>Gm10094</i>  |                | <i>Gm10094</i>  |                |                              |              |
| <i>Gm10096</i>  | <i>Gm10096</i> | <i>Gm10096</i>  | <i>Gm10096</i> |                              |              |
| <i>Gm10125</i>  |                | <i>Gm10125</i>  |                |                              |              |
| <i>Gm10142</i>  |                | <i>Gm10142</i>  |                |                              |              |
| <i>Gm10147</i>  | <i>Gm10147</i> | <i>Gm10147</i>  | <i>Gm10147</i> |                              |              |

Suppl. Table 1  
(69/234)

|                | ChIP-Seq hits |         |         | Unique hits with interactors |     |
|----------------|---------------|---------|---------|------------------------------|-----|
|                | unstimulated  | Ac      | LPS     | Ac                           | LPS |
| <i>Gm10220</i> | Gm10220       | Gm10220 |         |                              |     |
| <i>Gm10228</i> | Gm10228       |         |         |                              |     |
| <i>Gm10230</i> | Gm10230       | Gm10230 | Gm10230 |                              |     |
| <i>Gm10248</i> | Gm10248       |         |         |                              |     |
| <i>Gm10267</i> |               |         | Gm10267 |                              |     |
| <i>Gm10272</i> | Gm10272       |         |         |                              |     |
| <i>Gm10318</i> | Gm10318       |         |         |                              |     |
| <i>Gm10354</i> |               | Gm10354 |         |                              |     |
| <i>Gm10364</i> |               | Gm10364 | Gm10364 |                              |     |
| <i>Gm10375</i> |               | Gm10375 |         |                              |     |
| <i>Gm10389</i> |               | Gm10389 | Gm10389 |                              |     |
| <i>Gm10408</i> |               | Gm10408 |         |                              |     |
| <i>Gm10409</i> |               |         | Gm10409 |                              |     |
| <i>Gm10415</i> | Gm10415       | Gm10415 |         |                              |     |
| <i>Gm10416</i> | Gm10416       |         |         |                              |     |
| <i>Gm10436</i> |               | Gm10436 | Gm10436 |                              |     |
| <i>Gm10439</i> |               | Gm10439 |         |                              |     |
| <i>Gm10440</i> |               |         | Gm10440 |                              |     |
| <i>Gm10445</i> |               | Gm10445 |         |                              |     |
| <i>Gm10451</i> |               |         | Gm10451 |                              |     |
| <i>Gm10466</i> | Gm10466       |         |         |                              |     |
| <i>Gm10486</i> | Gm10486       | Gm10486 | Gm10486 |                              |     |
| <i>Gm10487</i> | Gm10487       | Gm10487 | Gm10487 |                              |     |
| <i>Gm10488</i> | Gm10488       | Gm10488 | Gm10488 |                              |     |
| <i>Gm10494</i> |               | Gm10494 | Gm10494 |                              |     |
| <i>Gm10512</i> |               | Gm10512 | Gm10512 |                              |     |
| <i>Gm10516</i> |               |         | Gm10516 |                              |     |
| <i>Gm10548</i> |               | Gm10548 |         |                              |     |
| <i>Gm10560</i> |               |         | Gm10560 |                              |     |
| <i>Gm10578</i> | Gm10578       |         |         |                              |     |
| <i>Gm10584</i> |               | Gm10584 |         |                              |     |
| <i>Gm10635</i> |               | Gm10635 |         |                              |     |
| <i>Gm10638</i> |               | Gm10638 |         |                              |     |
| <i>Gm10662</i> |               |         | Gm10662 |                              |     |
| <i>Gm10665</i> |               | Gm10665 |         |                              |     |
| <i>Gm10670</i> |               | Gm10670 |         |                              |     |
| <i>Gm10677</i> |               | Gm10677 |         |                              |     |
| <i>Gm10684</i> | Gm10684       |         |         |                              |     |
| <i>Gm10697</i> |               |         | Gm10697 |                              |     |
| <i>Gm10731</i> |               | Gm10731 |         |                              |     |
| <i>Gm10745</i> |               | Gm10745 | Gm10745 |                              |     |
| <i>Gm10767</i> |               | Gm10767 |         |                              |     |
| <i>Gm10785</i> |               | Gm10785 |         |                              |     |
| <i>Gm10787</i> |               | Gm10787 |         |                              |     |
| <i>Gm10789</i> |               | Gm10789 |         |                              |     |
| <i>Gm10804</i> | Gm10804       |         |         |                              |     |
| <i>Gm10825</i> |               |         | Gm10825 |                              |     |
| <i>Gm10845</i> | Gm10845       |         |         |                              |     |
| <i>Gm10857</i> |               | Gm10857 |         |                              |     |

Suppl. Table 1  
(70/234)

|                | ChIP-Seq hits  |                |                | Unique hits with interactors |                |
|----------------|----------------|----------------|----------------|------------------------------|----------------|
|                | unstimulated   | Ac             | LPS            | Ac                           | LPS            |
| <i>Gm10863</i> |                | <i>Gm10863</i> | <i>Gm10863</i> |                              |                |
| <i>Gm10865</i> | <i>Gm10865</i> | <i>Gm10865</i> | <i>Gm10865</i> |                              |                |
| <i>Gm10872</i> |                | <i>Gm10872</i> |                |                              |                |
| <i>Gm1110</i>  |                | <i>Gm1110</i>  |                |                              |                |
| <i>Gm11127</i> |                |                | <i>Gm11127</i> |                              |                |
| <i>Gm11149</i> |                | <i>Gm11149</i> |                |                              |                |
| <i>Gm11166</i> |                | <i>Gm11166</i> | <i>Gm11166</i> |                              |                |
| <i>Gm11201</i> |                | <i>Gm11201</i> |                |                              |                |
| <i>Gm11213</i> | <i>Gm11213</i> | <i>Gm11213</i> |                |                              |                |
| <i>Gm11236</i> | <i>Gm11236</i> | <i>Gm11236</i> | <i>Gm11236</i> |                              |                |
| <i>Gm11237</i> | <i>Gm11237</i> | <i>Gm11237</i> | <i>Gm11237</i> |                              |                |
| <i>Gm11346</i> |                | <i>Gm11346</i> |                |                              |                |
| <i>Gm1140</i>  |                | <i>Gm1140</i>  |                |                              |                |
| <i>Gm1141</i>  |                |                | <i>Gm1141</i>  |                              |                |
| <i>Gm11423</i> | <i>Gm11423</i> |                |                |                              |                |
| <i>Gm11426</i> |                | <i>Gm11426</i> |                |                              |                |
| <i>Gm11437</i> |                |                | <i>Gm11437</i> |                              |                |
| <i>Gm11468</i> |                |                | <i>Gm11468</i> |                              |                |
| <i>Gm11487</i> |                |                | <i>Gm11487</i> |                              |                |
| <i>Gm11517</i> | <i>Gm11517</i> | <i>Gm11517</i> |                |                              |                |
| <i>Gm11529</i> |                | <i>Gm11529</i> |                |                              |                |
| <i>Gm11538</i> |                | <i>Gm11538</i> |                |                              |                |
| <i>Gm11554</i> |                |                | <i>Gm11554</i> |                              |                |
| <i>Gm11559</i> |                | <i>Gm11559</i> |                |                              |                |
| <i>Gm11564</i> | <i>Gm11564</i> |                |                |                              |                |
| <i>Gm11569</i> |                |                | <i>Gm11569</i> |                              |                |
| <i>Gm11665</i> |                |                | <i>Gm11665</i> |                              |                |
| <i>Gm11696</i> |                |                | <i>Gm11696</i> |                              |                |
| <i>Gm11710</i> |                | <i>Gm11710</i> |                |                              |                |
| <i>Gm11711</i> |                | <i>Gm11711</i> |                |                              |                |
| <i>Gm11715</i> | <i>Gm11715</i> |                |                |                              |                |
| <i>Gm11729</i> | <i>Gm11729</i> | <i>Gm11729</i> | <i>Gm11729</i> |                              |                |
| <i>Gm11747</i> |                | <i>Gm11747</i> |                |                              |                |
| <i>Gm11757</i> |                | <i>Gm11757</i> |                |                              |                |
| <i>Gm11758</i> |                | <i>Gm11758</i> |                |                              |                |
| <i>Gm11762</i> |                | <i>Gm11762</i> |                |                              |                |
| <i>Gm11937</i> |                |                | <i>Gm11937</i> |                              |                |
| <i>Gm11961</i> |                | <i>Gm11961</i> | <i>Gm11961</i> |                              |                |
| <i>Gm11974</i> | <i>Gm11974</i> |                |                |                              |                |
| <i>Gm12</i>    | <i>Gm12</i>    | <i>Gm12</i>    | <i>Gm12</i>    |                              |                |
| <i>Gm12060</i> |                |                | <i>Gm12060</i> |                              |                |
| <i>Gm12108</i> | <i>Gm12108</i> | <i>Gm12108</i> | <i>Gm12108</i> |                              |                |
| <i>Gm12171</i> |                | <i>Gm12171</i> |                |                              |                |
| <i>Gm12191</i> | <i>Gm12191</i> | <i>Gm12191</i> | <i>Gm12191</i> |                              |                |
| <i>Gm12216</i> |                |                | <i>Gm12216</i> |                              |                |
| <i>Gm12250</i> |                |                | <i>Gm12250</i> |                              | <i>Gm12250</i> |
| <i>Gm12295</i> |                | <i>Gm12295</i> |                |                              |                |
| <i>Gm12359</i> | <i>Gm12359</i> | <i>Gm12359</i> | <i>Gm12359</i> |                              |                |
| <i>Gm12409</i> |                | <i>Gm12409</i> |                |                              |                |

Suppl. Table 1  
(71/234)

|                | ChIP-Seq hits |         | Unique hits with interactors |    |
|----------------|---------------|---------|------------------------------|----|
|                | unstimulated  | Ac      | LPS                          | Ac |
| <i>Gm12440</i> |               | Gm12440 |                              |    |
| <i>Gm12633</i> |               |         | Gm12633                      |    |
| <i>Gm12695</i> |               | Gm12695 |                              |    |
| <i>Gm12709</i> |               |         | Gm12709                      |    |
| <i>Gm12789</i> |               | Gm12789 | Gm12789                      |    |
| <i>Gm12794</i> | Gm12794       |         | Gm12794                      |    |
| <i>Gm12830</i> |               | Gm12830 | Gm12830                      |    |
| <i>Gm12942</i> |               | Gm12942 |                              |    |
| <i>Gm12992</i> |               | Gm12992 |                              |    |
| <i>Gm13003</i> |               |         | Gm13003                      |    |
| <i>Gm13030</i> |               | Gm13030 |                              |    |
| <i>Gm13031</i> |               |         | Gm13031                      |    |
| <i>Gm13032</i> |               | Gm13032 |                              |    |
| <i>Gm13034</i> |               | Gm13034 | Gm13034                      |    |
| <i>Gm13040</i> |               |         | Gm13040                      |    |
| <i>Gm13043</i> |               |         | Gm13043                      |    |
| <i>Gm13051</i> | Gm13051       |         | Gm13051                      |    |
| <i>Gm13057</i> |               |         | Gm13057                      |    |
| <i>Gm13083</i> |               | Gm13083 | Gm13083                      |    |
| <i>Gm13084</i> | Gm13084       |         |                              |    |
| <i>Gm13090</i> |               |         | Gm13090                      |    |
| <i>Gm13102</i> | Gm13102       |         |                              |    |
| <i>Gm13103</i> |               | Gm13103 |                              |    |
| <i>Gm13125</i> |               | Gm13125 |                              |    |
| <i>Gm13139</i> |               | Gm13139 | Gm13139                      |    |
| <i>Gm13152</i> |               | Gm13152 |                              |    |
| <i>Gm13154</i> | Gm13154       | Gm13154 | Gm13154                      |    |
| <i>Gm13157</i> |               | Gm13157 |                              |    |
| <i>Gm13178</i> |               |         | Gm13178                      |    |
| <i>Gm13212</i> |               |         | Gm13212                      |    |
| <i>Gm1322</i>  |               |         | Gm1322                       |    |
| <i>Gm13242</i> | Gm13242       | Gm13242 | Gm13242                      |    |
| <i>Gm13247</i> | Gm13247       |         |                              |    |
| <i>Gm13251</i> |               | Gm13251 | Gm13251                      |    |
| <i>Gm13272</i> |               |         | Gm13272                      |    |
| <i>Gm13285</i> |               |         | Gm13285                      |    |
| <i>Gm13289</i> |               |         | Gm13289                      |    |
| <i>Gm13290</i> |               |         | Gm13290                      |    |
| <i>Gm13293</i> | Gm13293       | Gm13293 |                              |    |
| <i>Gm13306</i> |               |         | Gm13306                      |    |
| <i>Gm13363</i> |               | Gm13363 | Gm13363                      |    |
| <i>Gm13375</i> |               |         | Gm13375                      |    |
| <i>Gm13483</i> |               | Gm13483 |                              |    |
| <i>Gm13490</i> |               | Gm13490 |                              |    |
| <i>Gm13497</i> | Gm13497       | Gm13497 |                              |    |
| <i>Gm13546</i> |               |         | Gm13546                      |    |
| <i>Gm13547</i> |               |         | Gm13547                      |    |
| <i>Gm136</i>   |               |         | Gm136                        |    |
| <i>Gm13629</i> | Gm13629       |         | Gm13629                      |    |

Suppl. Table 1

(72/234)

|                | ChIP-Seq hits |         |         | Unique hits with interactors |         |
|----------------|---------------|---------|---------|------------------------------|---------|
|                | unstimulated  | Ac      | LPS     | Ac                           | LPS     |
| <i>Gm13710</i> |               | Gm13710 |         |                              |         |
| <i>Gm13749</i> |               |         | Gm13749 |                              |         |
| <i>Gm13752</i> |               | Gm13752 |         |                              |         |
| <i>Gm13769</i> |               | Gm13769 |         |                              |         |
| <i>Gm13807</i> |               | Gm13807 |         |                              |         |
| <i>Gm13830</i> |               | Gm13830 | Gm13830 |                              |         |
| <i>Gm13871</i> |               | Gm13871 |         |                              |         |
| <i>Gm13985</i> | Gm13985       |         |         |                              |         |
| <i>Gm13986</i> |               |         | Gm13986 |                              |         |
| <i>Gm14005</i> |               |         | Gm14005 |                              |         |
| <i>Gm14023</i> |               | Gm14023 |         |                              |         |
| <i>Gm14085</i> | Gm14085       |         | Gm14085 |                              |         |
| <i>Gm14124</i> |               | Gm14124 |         |                              |         |
| <i>Gm14151</i> | Gm14151       | Gm14151 |         |                              |         |
| <i>Gm14169</i> |               | Gm14169 |         |                              |         |
| <i>Gm14204</i> |               |         | Gm14204 |                              |         |
| <i>Gm14288</i> |               | Gm14288 | Gm14288 |                              |         |
| <i>Gm14295</i> |               |         | Gm14295 |                              |         |
| <i>Gm14296</i> | Gm14296       | Gm14296 |         |                              |         |
| <i>Gm14308</i> | Gm14308       |         | Gm14308 |                              |         |
| <i>Gm14325</i> |               | Gm14325 |         | Gm14325                      |         |
| <i>Gm14326</i> |               |         | Gm14326 |                              | Gm14326 |
| <i>Gm14345</i> |               | Gm14345 |         |                              |         |
| <i>Gm14346</i> |               | Gm14346 | Gm14346 |                              |         |
| <i>Gm14351</i> |               | Gm14351 | Gm14351 |                              |         |
| <i>Gm14391</i> | Gm14391       |         | Gm14391 |                              |         |
| <i>Gm14430</i> | Gm14430       |         | Gm14430 |                              |         |
| <i>Gm14434</i> | Gm14434       |         | Gm14434 |                              |         |
| <i>Gm14440</i> |               | Gm14440 | Gm14440 |                              |         |
| <i>Gm14458</i> |               | Gm14458 |         |                              |         |
| <i>Gm14475</i> | Gm14475       |         |         |                              |         |
| <i>Gm14476</i> | Gm14476       |         |         |                              |         |
| <i>Gm14477</i> | Gm14477       |         |         |                              |         |
| <i>Gm14479</i> | Gm14479       |         |         |                              |         |
| <i>Gm14482</i> | Gm14482       |         |         |                              |         |
| <i>Gm14483</i> | Gm14483       |         |         |                              |         |
| <i>Gm14496</i> | Gm14496       |         |         |                              |         |
| <i>Gm14632</i> | Gm14632       | Gm14632 | Gm14632 |                              |         |
| <i>Gm14634</i> |               | Gm14634 | Gm14634 |                              |         |
| <i>Gm14692</i> |               | Gm14692 |         |                              |         |
| <i>Gm14718</i> |               |         | Gm14718 |                              |         |
| <i>Gm14744</i> |               | Gm14744 |         |                              |         |
| <i>Gm14819</i> | Gm14819       | Gm14819 | Gm14819 |                              |         |
| <i>Gm14920</i> |               | Gm14920 |         |                              |         |
| <i>Gm15023</i> |               | Gm15023 |         |                              |         |
| <i>Gm15085</i> | Gm15085       | Gm15085 |         |                              |         |
| <i>Gm15091</i> |               |         | Gm15091 |                              |         |
| <i>Gm15107</i> | Gm15107       | Gm15107 |         |                              |         |
| <i>Gm15179</i> | Gm15179       |         |         |                              |         |



Suppl. Table 1  
(73/234)

|                | ChIP-Seq hits |         |         | Unique hits with interactors |     |
|----------------|---------------|---------|---------|------------------------------|-----|
|                | unstimulated  | Ac      | LPS     | Ac                           | LPS |
| <i>Gm15284</i> | Gm15284       |         |         |                              |     |
| <i>Gm15319</i> | Gm15319       | Gm15319 |         |                              |     |
| <i>Gm15408</i> | Gm15408       |         |         |                              |     |
| <i>Gm15412</i> |               | Gm15412 |         |                              |     |
| <i>Gm15413</i> |               |         | Gm15413 |                              |     |
| <i>Gm15421</i> | Gm15421       |         |         |                              |     |
| <i>Gm15545</i> | Gm15545       |         |         |                              |     |
| <i>Gm15612</i> | Gm15612       |         |         |                              |     |
| <i>Gm15645</i> |               | Gm15645 |         |                              |     |
| <i>Gm15694</i> |               | Gm15694 |         |                              |     |
| <i>Gm15698</i> | Gm15698       | Gm15698 | Gm15698 |                              |     |
| <i>Gm15706</i> | Gm15706       |         |         |                              |     |
| <i>Gm15708</i> |               |         | Gm15708 |                              |     |
| <i>Gm15760</i> |               |         | Gm15760 |                              |     |
| <i>Gm15772</i> | Gm15772       |         |         |                              |     |
| <i>Gm15787</i> | Gm15787       |         | Gm15787 |                              |     |
| <i>Gm15800</i> | Gm15800       |         |         |                              |     |
| <i>Gm15850</i> |               | Gm15850 |         |                              |     |
| <i>Gm15880</i> |               |         | Gm15880 |                              |     |
| <i>Gm15908</i> |               |         | Gm15908 |                              |     |
| <i>Gm15915</i> | Gm15915       | Gm15915 | Gm15915 |                              |     |
| <i>Gm15941</i> | Gm15941       |         |         |                              |     |
| <i>Gm15987</i> | Gm15987       |         | Gm15987 |                              |     |
| <i>Gm16023</i> |               | Gm16023 | Gm16023 |                              |     |
| <i>Gm16070</i> | Gm16070       |         |         |                              |     |
| <i>Gm16157</i> |               |         | Gm16157 |                              |     |
| <i>Gm16287</i> |               |         | Gm16287 |                              |     |
| <i>Gm16294</i> |               |         | Gm16294 |                              |     |
| <i>Gm16325</i> | Gm16325       | Gm16325 | Gm16325 |                              |     |
| <i>Gm16367</i> |               | Gm16367 |         |                              |     |
| <i>Gm16381</i> | Gm16381       |         | Gm16381 |                              |     |
| <i>Gm16386</i> |               | Gm16386 |         |                              |     |
| <i>Gm16442</i> |               | Gm16442 |         |                              |     |
| <i>Gm16451</i> |               | Gm16451 |         |                              |     |
| <i>Gm1647</i>  |               |         | Gm1647  |                              |     |
| <i>Gm16497</i> |               | Gm16497 |         |                              |     |
| <i>Gm16501</i> |               |         | Gm16501 |                              |     |
| <i>Gm16513</i> |               | Gm16513 |         |                              |     |
| <i>Gm1653</i>  | Gm1653        | Gm1653  |         |                              |     |
| <i>Gm16548</i> |               | Gm16548 |         |                              |     |
| <i>Gm16596</i> |               | Gm16596 |         |                              |     |
| <i>Gm166</i>   |               | Gm166   |         |                              |     |
| <i>Gm16617</i> |               | Gm16617 |         |                              |     |
| <i>Gm16675</i> | Gm16675       | Gm16675 |         |                              |     |
| <i>Gm16702</i> |               | Gm16702 | Gm16702 |                              |     |
| <i>Gm16793</i> | Gm16793       |         |         |                              |     |
| <i>Gm16853</i> |               |         | Gm16853 |                              |     |
| <i>Gm16894</i> | Gm16894       |         |         |                              |     |
| <i>Gm16907</i> |               |         | Gm16907 |                              |     |

Suppl. Table 1  
(74/234)

|                | ChIP-Seq hits |         |         | Unique hits with interactors |     |
|----------------|---------------|---------|---------|------------------------------|-----|
|                | unstimulated  | Ac      | LPS     | Ac                           | LPS |
| <i>Gm16938</i> | Gm16938       |         |         |                              |     |
| <i>Gm17066</i> | Gm17066       | Gm17066 | Gm17066 |                              |     |
| <i>Gm1720</i>  | Gm1720        |         |         |                              |     |
| <i>Gm17296</i> |               | Gm17296 |         |                              |     |
| <i>Gm17359</i> |               |         | Gm17359 |                              |     |
| <i>Gm17644</i> |               | Gm17644 |         |                              |     |
| <i>Gm17769</i> |               | Gm17769 |         |                              |     |
| <i>Gm17801</i> |               | Gm17801 |         |                              |     |
| <i>Gm17821</i> |               | Gm17821 |         |                              |     |
| <i>Gm1821</i>  |               | Gm1821  | Gm1821  |                              |     |
| <i>Gm18409</i> |               | Gm18409 |         |                              |     |
| <i>Gm19276</i> | Gm19276       |         |         |                              |     |
| <i>Gm19303</i> |               | Gm19303 |         |                              |     |
| <i>Gm19345</i> | Gm19345       |         |         |                              |     |
| <i>Gm19434</i> |               | Gm19434 |         |                              |     |
| <i>Gm19510</i> |               |         | Gm19510 |                              |     |
| <i>Gm19522</i> |               |         | Gm19522 |                              |     |
| <i>Gm19557</i> |               | Gm19557 | Gm19557 |                              |     |
| <i>Gm19583</i> |               |         | Gm19583 |                              |     |
| <i>Gm1966</i>  |               | Gm1966  | Gm1966  |                              |     |
| <i>Gm19668</i> |               | Gm19668 | Gm19668 |                              |     |
| <i>Gm1968</i>  |               | Gm1968  |         |                              |     |
| <i>Gm19705</i> |               | Gm19705 |         |                              |     |
| <i>Gm19757</i> |               | Gm19757 |         |                              |     |
| <i>Gm1979</i>  |               | Gm1979  | Gm1979  |                              |     |
| <i>Gm19897</i> | Gm19897       |         |         |                              |     |
| <i>Gm1993</i>  |               |         | Gm1993  |                              |     |
| <i>Gm19990</i> |               | Gm19990 |         |                              |     |
| <i>Gm20063</i> |               |         | Gm20063 |                              |     |
| <i>Gm2011</i>  |               |         | Gm2011  |                              |     |
| <i>Gm20110</i> |               | Gm20110 | Gm20110 |                              |     |
| <i>Gm20125</i> | Gm20125       | Gm20125 |         |                              |     |
| <i>Gm20139</i> |               | Gm20139 |         |                              |     |
| <i>Gm2016</i>  | Gm2016        | Gm2016  | Gm2016  |                              |     |
| <i>Gm20219</i> |               | Gm20219 | Gm20219 |                              |     |
| <i>Gm2022</i>  |               | Gm2022  | Gm2022  |                              |     |
| <i>Gm2027</i>  |               | Gm2027  | Gm2027  |                              |     |
| <i>Gm2030</i>  | Gm2030        |         |         |                              |     |
| <i>Gm20300</i> | Gm20300       | Gm20300 | Gm20300 |                              |     |
| <i>Gm20319</i> |               |         | Gm20319 |                              |     |
| <i>Gm20356</i> |               |         | Gm20356 |                              |     |
| <i>Gm2042</i>  |               | Gm2042  | Gm2042  |                              |     |
| <i>Gm20556</i> |               | Gm20556 |         |                              |     |
| <i>Gm20594</i> | Gm20594       |         | Gm20594 |                              |     |
| <i>Gm20597</i> | Gm20597       |         | Gm20597 |                              |     |
| <i>Gm20604</i> | Gm20604       |         |         |                              |     |
| <i>Gm20605</i> |               | Gm20605 |         |                              |     |
| <i>Gm2061</i>  |               | Gm2061  |         |                              |     |
| <i>Gm20735</i> |               |         | Gm20735 |                              |     |

Suppl. Table 1  
(75/234)

|                | ChIP-Seq hits  |                |                | Unique hits with interactors |     |
|----------------|----------------|----------------|----------------|------------------------------|-----|
|                | unstimulated   | Ac             | LPS            | Ac                           | LPS |
| <i>Gm20738</i> |                | <i>Gm20738</i> |                |                              |     |
| <i>Gm20744</i> |                | <i>Gm20744</i> |                |                              |     |
| <i>Gm20747</i> |                | <i>Gm20747</i> |                |                              |     |
| <i>Gm20752</i> |                | <i>Gm20752</i> |                |                              |     |
| <i>Gm20753</i> |                |                | <i>Gm20753</i> |                              |     |
| <i>Gm20757</i> |                |                | <i>Gm20757</i> |                              |     |
| <i>Gm20759</i> |                | <i>Gm20759</i> |                |                              |     |
| <i>Gm20765</i> | <i>Gm20765</i> | <i>Gm20765</i> | <i>Gm20765</i> |                              |     |
| <i>Gm20806</i> |                |                | <i>Gm20806</i> |                              |     |
| <i>Gm20823</i> |                | <i>Gm20823</i> |                |                              |     |
| <i>Gm20826</i> | <i>Gm20826</i> | <i>Gm20826</i> | <i>Gm20826</i> |                              |     |
| <i>Gm2083</i>  | <i>Gm2083</i>  | <i>Gm2083</i>  | <i>Gm2083</i>  |                              |     |
| <i>Gm20831</i> |                |                | <i>Gm20831</i> |                              |     |
| <i>Gm20857</i> |                |                | <i>Gm20857</i> |                              |     |
| <i>Gm20858</i> |                |                | <i>Gm20858</i> |                              |     |
| <i>Gm2087</i>  |                | <i>Gm2087</i>  |                |                              |     |
| <i>Gm20939</i> | <i>Gm20939</i> |                | <i>Gm20939</i> |                              |     |
| <i>Gm21057</i> |                | <i>Gm21057</i> |                |                              |     |
| <i>Gm2109</i>  | <i>Gm2109</i>  |                |                |                              |     |
| <i>Gm21119</i> | <i>Gm21119</i> |                | <i>Gm21119</i> |                              |     |
| <i>Gm2115</i>  | <i>Gm2115</i>  |                |                |                              |     |
| <i>Gm21221</i> |                |                | <i>Gm21221</i> |                              |     |
| <i>Gm21284</i> |                | <i>Gm21284</i> | <i>Gm21284</i> |                              |     |
| <i>Gm21293</i> | <i>Gm21293</i> | <i>Gm21293</i> | <i>Gm21293</i> |                              |     |
| <i>Gm21304</i> | <i>Gm21304</i> | <i>Gm21304</i> | <i>Gm21304</i> |                              |     |
| <i>Gm21312</i> | <i>Gm21312</i> | <i>Gm21312</i> | <i>Gm21312</i> |                              |     |
| <i>Gm21319</i> | <i>Gm21319</i> |                |                |                              |     |
| <i>Gm21379</i> |                | <i>Gm21379</i> | <i>Gm21379</i> |                              |     |
| <i>Gm21671</i> |                | <i>Gm21671</i> |                |                              |     |
| <i>Gm21677</i> | <i>Gm21677</i> |                |                |                              |     |
| <i>Gm21708</i> | <i>Gm21708</i> |                |                |                              |     |
| <i>Gm21944</i> |                | <i>Gm21944</i> |                |                              |     |
| <i>Gm21975</i> |                |                | <i>Gm21975</i> |                              |     |
| <i>Gm21992</i> | <i>Gm21992</i> | <i>Gm21992</i> | <i>Gm21992</i> |                              |     |
| <i>Gm23363</i> |                | <i>Gm23363</i> |                |                              |     |
| <i>Gm24148</i> | <i>Gm24148</i> |                |                |                              |     |
| <i>Gm2506</i>  |                |                | <i>Gm2506</i>  |                              |     |
| <i>Gm2516</i>  |                | <i>Gm2516</i>  |                |                              |     |
| <i>Gm2518</i>  |                | <i>Gm2518</i>  | <i>Gm2518</i>  |                              |     |
| <i>Gm25285</i> |                |                | <i>Gm25285</i> |                              |     |
| <i>Gm2560</i>  | <i>Gm2560</i>  |                |                |                              |     |
| <i>Gm26688</i> |                | <i>Gm26688</i> | <i>Gm26688</i> |                              |     |
| <i>Gm26705</i> |                |                | <i>Gm26705</i> |                              |     |
| <i>Gm2694</i>  |                |                | <i>Gm2694</i>  |                              |     |
| <i>Gm2696</i>  | <i>Gm2696</i>  |                |                |                              |     |
| <i>Gm27162</i> | <i>Gm27162</i> |                |                |                              |     |
| <i>Gm2762</i>  |                |                | <i>Gm2762</i>  |                              |     |
| <i>Gm27740</i> | <i>Gm27740</i> | <i>Gm27740</i> | <i>Gm27740</i> |                              |     |
| <i>Gm27775</i> | <i>Gm27775</i> | <i>Gm27775</i> | <i>Gm27775</i> |                              |     |

Suppl. Table 1  
(76/234)

|                | ChIP-Seq hits  |                |                | Unique hits with interactors |     |
|----------------|----------------|----------------|----------------|------------------------------|-----|
|                | unstimulated   | Ac             | LPS            | Ac                           | LPS |
| <i>Gm28979</i> |                | <i>Gm28979</i> |                |                              |     |
| <i>Gm29685</i> |                | <i>Gm29685</i> |                |                              |     |
| <i>Gm29687</i> |                |                | <i>Gm29687</i> |                              |     |
| <i>Gm29811</i> | <i>Gm29811</i> |                |                |                              |     |
| <i>Gm2a</i>    | <i>Gm2a</i>    |                | <i>Gm2a</i>    |                              |     |
| <i>Gm3020</i>  |                | <i>Gm3020</i>  |                |                              |     |
| <i>Gm3139</i>  |                | <i>Gm3139</i>  |                |                              |     |
| <i>Gm3143</i>  | <i>Gm3143</i>  | <i>Gm3143</i>  | <i>Gm3143</i>  |                              |     |
| <i>Gm3219</i>  |                |                | <i>Gm3219</i>  |                              |     |
| <i>Gm3259</i>  |                |                | <i>Gm3259</i>  |                              |     |
| <i>Gm3285</i>  |                | <i>Gm3285</i>  |                |                              |     |
| <i>Gm3286</i>  |                |                | <i>Gm3286</i>  |                              |     |
| <i>Gm3317</i>  |                |                | <i>Gm3317</i>  |                              |     |
| <i>Gm3336</i>  |                | <i>Gm3336</i>  |                |                              |     |
| <i>Gm3376</i>  | <i>Gm3376</i>  |                |                |                              |     |
| <i>Gm3402</i>  |                |                | <i>Gm3402</i>  |                              |     |
| <i>Gm3414</i>  | <i>Gm3414</i>  |                |                |                              |     |
| <i>Gm3415</i>  |                |                | <i>Gm3415</i>  |                              |     |
| <i>Gm3417</i>  | <i>Gm3417</i>  |                | <i>Gm3417</i>  |                              |     |
| <i>Gm3435</i>  | <i>Gm3435</i>  |                | <i>Gm3435</i>  |                              |     |
| <i>Gm3448</i>  | <i>Gm3448</i>  |                | <i>Gm3448</i>  |                              |     |
| <i>Gm3458</i>  |                | <i>Gm3458</i>  |                |                              |     |
| <i>Gm3488</i>  |                |                | <i>Gm3488</i>  |                              |     |
| <i>Gm35612</i> | <i>Gm35612</i> |                |                |                              |     |
| <i>Gm3604</i>  | <i>Gm3604</i>  |                | <i>Gm3604</i>  |                              |     |
| <i>Gm3646</i>  |                | <i>Gm3646</i>  |                |                              |     |
| <i>Gm3706</i>  |                | <i>Gm3706</i>  | <i>Gm3706</i>  |                              |     |
| <i>Gm3750</i>  |                | <i>Gm3750</i>  | <i>Gm3750</i>  |                              |     |
| <i>Gm3776</i>  |                |                | <i>Gm3776</i>  |                              |     |
| <i>Gm38397</i> |                | <i>Gm38397</i> |                |                              |     |
| <i>Gm38403</i> |                | <i>Gm38403</i> | <i>Gm38403</i> |                              |     |
| <i>Gm38407</i> |                | <i>Gm38407</i> |                |                              |     |
| <i>Gm38413</i> | <i>Gm38413</i> |                |                |                              |     |
| <i>Gm38415</i> |                | <i>Gm38415</i> | <i>Gm38415</i> |                              |     |
| <i>Gm38416</i> |                | <i>Gm38416</i> |                |                              |     |
| <i>Gm38419</i> |                | <i>Gm38419</i> | <i>Gm38419</i> |                              |     |
| <i>Gm38425</i> |                |                | <i>Gm38425</i> |                              |     |
| <i>Gm38426</i> | <i>Gm38426</i> |                |                |                              |     |
| <i>Gm38437</i> | <i>Gm38437</i> | <i>Gm38437</i> | <i>Gm38437</i> |                              |     |
| <i>Gm38509</i> |                | <i>Gm38509</i> |                |                              |     |
| <i>Gm38666</i> |                | <i>Gm38666</i> |                |                              |     |
| <i>Gm4027</i>  |                |                | <i>Gm4027</i>  |                              |     |
| <i>Gm4133</i>  | <i>Gm4133</i>  |                |                |                              |     |
| <i>Gm4187</i>  | <i>Gm4187</i>  |                |                |                              |     |
| <i>Gm4251</i>  |                |                | <i>Gm4251</i>  |                              |     |
| <i>Gm4262</i>  |                | <i>Gm4262</i>  |                |                              |     |
| <i>Gm4278</i>  | <i>Gm4278</i>  | <i>Gm4278</i>  |                |                              |     |
| <i>Gm4285</i>  | <i>Gm4285</i>  | <i>Gm4285</i>  | <i>Gm4285</i>  |                              |     |
| <i>Gm4301</i>  |                | <i>Gm4301</i>  | <i>Gm4301</i>  |                              |     |

Suppl. Table 1  
(77/234)

|               | ChIP-Seq hits |               |               | Unique hits with interactors |               |
|---------------|---------------|---------------|---------------|------------------------------|---------------|
|               | unstimulated  | Ac            | LPS           | Ac                           | LPS           |
| <i>Gm4303</i> |               |               | <i>Gm4303</i> |                              |               |
| <i>Gm4305</i> |               |               | <i>Gm4305</i> |                              |               |
| <i>Gm4307</i> |               |               | <i>Gm4307</i> |                              |               |
| <i>Gm4312</i> |               | <i>Gm4312</i> | <i>Gm4312</i> |                              |               |
| <i>Gm4340</i> | <i>Gm4340</i> | <i>Gm4340</i> | <i>Gm4340</i> |                              |               |
| <i>Gm436</i>  | <i>Gm436</i>  |               |               |                              |               |
| <i>Gm4371</i> | <i>Gm4371</i> |               |               |                              |               |
| <i>Gm44</i>   |               | <i>Gm44</i>   | <i>Gm44</i>   |                              |               |
| <i>Gm4432</i> | <i>Gm4432</i> |               | <i>Gm4432</i> |                              |               |
| <i>Gm4461</i> |               |               | <i>Gm4461</i> |                              |               |
| <i>Gm4477</i> |               |               | <i>Gm4477</i> |                              |               |
| <i>Gm4498</i> |               | <i>Gm4498</i> |               |                              |               |
| <i>Gm4532</i> |               | <i>Gm4532</i> |               |                              |               |
| <i>Gm4541</i> |               | <i>Gm4541</i> |               |                              |               |
| <i>Gm4724</i> | <i>Gm4724</i> |               | <i>Gm4724</i> |                              |               |
| <i>Gm4736</i> |               | <i>Gm4736</i> |               |                              |               |
| <i>Gm4827</i> |               | <i>Gm4827</i> |               |                              |               |
| <i>Gm4836</i> | <i>Gm4836</i> | <i>Gm4836</i> | <i>Gm4836</i> |                              |               |
| <i>Gm4841</i> |               |               | <i>Gm4841</i> |                              | <i>Gm4841</i> |
| <i>Gm4850</i> |               | <i>Gm4850</i> | <i>Gm4850</i> |                              |               |
| <i>Gm4922</i> |               | <i>Gm4922</i> |               |                              |               |
| <i>Gm4925</i> |               | <i>Gm4925</i> | <i>Gm4925</i> |                              |               |
| <i>Gm4944</i> | <i>Gm4944</i> |               |               |                              |               |
| <i>Gm4952</i> |               | <i>Gm4952</i> |               |                              |               |
| <i>Gm4956</i> |               | <i>Gm4956</i> |               |                              |               |
| <i>Gm4971</i> | <i>Gm4971</i> |               | <i>Gm4971</i> |                              |               |
| <i>Gm4984</i> | <i>Gm4984</i> | <i>Gm4984</i> | <i>Gm4984</i> |                              |               |
| <i>Gm5039</i> |               |               | <i>Gm5039</i> |                              |               |
| <i>Gm5069</i> |               | <i>Gm5069</i> |               |                              |               |
| <i>Gm5071</i> |               |               | <i>Gm5071</i> |                              |               |
| <i>Gm5072</i> |               | <i>Gm5072</i> | <i>Gm5072</i> |                              |               |
| <i>Gm5082</i> |               | <i>Gm5082</i> | <i>Gm5082</i> |                              |               |
| <i>Gm5086</i> |               |               | <i>Gm5086</i> |                              |               |
| <i>Gm5087</i> |               |               | <i>Gm5087</i> |                              |               |
| <i>Gm5091</i> |               |               | <i>Gm5091</i> |                              |               |
| <i>Gm5105</i> |               |               | <i>Gm5105</i> |                              |               |
| <i>Gm5111</i> | <i>Gm5111</i> | <i>Gm5111</i> | <i>Gm5111</i> |                              |               |
| <i>Gm5113</i> |               | <i>Gm5113</i> |               | <i>Gm5113</i>                |               |
| <i>Gm5124</i> |               | <i>Gm5124</i> |               |                              |               |
| <i>Gm5136</i> |               | <i>Gm5136</i> |               |                              |               |
| <i>Gm5141</i> |               | <i>Gm5141</i> |               |                              |               |
| <i>Gm5142</i> |               | <i>Gm5142</i> |               |                              |               |
| <i>Gm5144</i> |               |               | <i>Gm5144</i> |                              |               |
| <i>Gm5148</i> |               | <i>Gm5148</i> | <i>Gm5148</i> |                              |               |
| <i>Gm525</i>  | <i>Gm525</i>  |               |               |                              |               |
| <i>Gm527</i>  |               | <i>Gm527</i>  |               |                              |               |
| <i>Gm53</i>   |               | <i>Gm53</i>   |               |                              |               |
| <i>Gm5347</i> |               | <i>Gm5347</i> |               |                              |               |
| <i>Gm5414</i> |               |               | <i>Gm5414</i> |                              |               |

Suppl. Table 1  
(78/234)

|               | ChIP-Seq hits |        |        | Unique hits with interactors |        |
|---------------|---------------|--------|--------|------------------------------|--------|
|               | unstimulated  | Ac     | LPS    | Ac                           | LPS    |
| <i>Gm5416</i> | Gm5416        |        |        |                              |        |
| <i>Gm5420</i> |               |        | Gm5420 |                              |        |
| <i>Gm5434</i> |               |        | Gm5434 |                              |        |
| <i>Gm5458</i> |               | Gm5458 |        |                              |        |
| <i>Gm5464</i> |               |        | Gm5464 |                              | Gm5464 |
| <i>Gm5476</i> |               |        | Gm5476 |                              |        |
| <i>Gm5483</i> | Gm5483        |        |        |                              |        |
| <i>Gm5485</i> | Gm5485        |        | Gm5485 |                              |        |
| <i>Gm5512</i> | Gm5512        |        | Gm5512 |                              |        |
| <i>Gm5532</i> | Gm5532        |        |        |                              |        |
| <i>Gm5538</i> |               | Gm5538 |        |                              |        |
| <i>Gm5549</i> |               | Gm5549 |        |                              |        |
| <i>Gm5577</i> |               |        | Gm5577 |                              |        |
| <i>Gm5592</i> |               |        | Gm5592 |                              |        |
| <i>Gm5595</i> |               | Gm5595 | Gm5595 |                              |        |
| <i>Gm5615</i> |               |        | Gm5615 |                              |        |
| <i>Gm5617</i> | Gm5617        | Gm5617 | Gm5617 |                              |        |
| <i>Gm5627</i> |               |        | Gm5627 |                              |        |
| <i>Gm5635</i> | Gm5635        |        |        |                              |        |
| <i>Gm5643</i> | Gm5643        | Gm5643 |        |                              |        |
| <i>Gm5712</i> |               |        | Gm5712 |                              |        |
| <i>Gm5741</i> |               | Gm5741 |        |                              |        |
| <i>Gm5766</i> |               |        | Gm5766 |                              |        |
| <i>Gm5779</i> |               | Gm5779 |        |                              |        |
| <i>Gm5797</i> |               |        | Gm5797 |                              |        |
| <i>Gm5801</i> | Gm5801        | Gm5801 | Gm5801 |                              |        |
| <i>Gm5803</i> |               | Gm5803 | Gm5803 |                              |        |
| <i>Gm5833</i> | Gm5833        |        | Gm5833 |                              |        |
| <i>Gm5862</i> |               | Gm5862 |        |                              |        |
| <i>Gm5885</i> |               | Gm5885 |        |                              |        |
| <i>Gm5886</i> | Gm5886        |        |        |                              |        |
| <i>Gm5891</i> |               |        | Gm5891 |                              |        |
| <i>Gm5907</i> |               | Gm5907 |        |                              |        |
| <i>Gm5916</i> |               | Gm5916 |        |                              |        |
| <i>Gm5934</i> |               | Gm5934 | Gm5934 |                              |        |
| <i>Gm5935</i> |               | Gm5935 | Gm5935 |                              |        |
| <i>Gm5941</i> | Gm5941        |        | Gm5941 |                              |        |
| <i>Gm595</i>  |               | Gm595  |        |                              |        |
| <i>Gm597</i>  | Gm597         | Gm597  | Gm597  |                              |        |
| <i>Gm6026</i> |               |        | Gm6026 |                              |        |
| <i>Gm6034</i> | Gm6034        |        | Gm6034 |                              |        |
| <i>Gm6083</i> |               |        | Gm6083 |                              |        |
| <i>Gm6086</i> |               | Gm6086 | Gm6086 |                              |        |
| <i>Gm6093</i> | Gm6093        |        |        |                              |        |
| <i>Gm6182</i> | Gm6182        | Gm6182 |        |                              |        |
| <i>Gm6194</i> | Gm6194        |        | Gm6194 |                              |        |
| <i>Gm6225</i> | Gm6225        |        |        |                              |        |
| <i>Gm6249</i> |               |        | Gm6249 |                              |        |
| <i>Gm6268</i> | Gm6268        | Gm6268 | Gm6268 |                              |        |

Suppl. Table 1  
(79/234)

|               | ChIP-Seq hits |        |        | Unique hits with interactors |     |
|---------------|---------------|--------|--------|------------------------------|-----|
|               | unstimulated  | Ac     | LPS    | Ac                           | LPS |
| <i>Gm6297</i> | Gm6297        | Gm6297 | Gm6297 |                              |     |
| <i>Gm6307</i> |               | Gm6307 |        |                              |     |
| <i>Gm6402</i> |               | Gm6402 | Gm6402 |                              |     |
| <i>Gm6416</i> | Gm6416        |        | Gm6416 |                              |     |
| <i>Gm648</i>  |               | Gm648  |        |                              |     |
| <i>Gm6484</i> | Gm6484        | Gm6484 |        |                              |     |
| <i>Gm6524</i> | Gm6524        |        |        |                              |     |
| <i>Gm6537</i> | Gm6537        |        |        |                              |     |
| <i>Gm6559</i> |               |        | Gm6559 |                              |     |
| <i>Gm6567</i> |               | Gm6567 |        |                              |     |
| <i>Gm6583</i> | Gm6583        | Gm6583 |        |                              |     |
| <i>Gm6588</i> |               |        | Gm6588 |                              |     |
| <i>Gm6592</i> | Gm6592        |        |        |                              |     |
| <i>Gm6607</i> |               |        | Gm6607 |                              |     |
| <i>Gm6614</i> |               | Gm6614 |        |                              |     |
| <i>Gm6634</i> |               | Gm6634 |        |                              |     |
| <i>Gm6639</i> |               |        | Gm6639 |                              |     |
| <i>Gm6654</i> | Gm6654        |        | Gm6654 |                              |     |
| <i>Gm6710</i> | Gm6710        |        | Gm6710 |                              |     |
| <i>Gm6763</i> | Gm6763        | Gm6763 | Gm6763 |                              |     |
| <i>Gm6815</i> |               | Gm6815 | Gm6815 |                              |     |
| <i>Gm684</i>  |               | Gm684  | Gm684  |                              |     |
| <i>Gm6878</i> |               |        | Gm6878 |                              |     |
| <i>Gm694</i>  | Gm694         |        |        |                              |     |
| <i>Gm6994</i> |               |        | Gm6994 |                              |     |
| <i>Gm7104</i> |               | Gm7104 | Gm7104 |                              |     |
| <i>Gm7134</i> | Gm7134        |        |        |                              |     |
| <i>Gm7168</i> |               |        | Gm7168 |                              |     |
| <i>Gm7271</i> |               |        | Gm7271 |                              |     |
| <i>Gm7334</i> |               | Gm7334 |        |                              |     |
| <i>Gm7337</i> |               |        | Gm7337 |                              |     |
| <i>Gm7444</i> |               | Gm7444 |        |                              |     |
| <i>Gm7616</i> | Gm7616        |        |        |                              |     |
| <i>Gm765</i>  |               | Gm765  |        |                              |     |
| <i>Gm766</i>  |               | Gm766  |        |                              |     |
| <i>Gm7694</i> |               | Gm7694 |        |                              |     |
| <i>Gm7714</i> | Gm7714        | Gm7714 | Gm7714 |                              |     |
| <i>Gm7849</i> | Gm7849        |        | Gm7849 |                              |     |
| <i>Gm7854</i> |               |        | Gm7854 |                              |     |
| <i>Gm7861</i> | Gm7861        |        | Gm7861 |                              |     |
| <i>Gm7977</i> | Gm7977        |        |        |                              |     |
| <i>Gm8267</i> |               | Gm8267 |        |                              |     |
| <i>Gm8298</i> |               |        | Gm8298 |                              |     |
| <i>Gm8300</i> |               |        | Gm8300 |                              |     |
| <i>Gm8363</i> | Gm8363        | Gm8363 | Gm8363 |                              |     |
| <i>Gm8369</i> |               | Gm8369 |        |                              |     |
| <i>Gm839</i>  | Gm839         |        |        |                              |     |
| <i>Gm8453</i> |               | Gm8453 |        |                              |     |
| <i>Gm8580</i> |               |        | Gm8580 |                              |     |

Suppl. Table 1  
(80/234)

|               | ChIP-Seq hits |               |               | Unique hits with interactors |             |
|---------------|---------------|---------------|---------------|------------------------------|-------------|
|               | unstimulated  | Ac            | LPS           | Ac                           | LPS         |
| <i>Gm8693</i> |               |               | <i>Gm8693</i> |                              |             |
| <i>Gm8709</i> |               |               | <i>Gm8709</i> |                              |             |
| <i>Gm8764</i> | <i>Gm8764</i> | <i>Gm8764</i> | <i>Gm8764</i> |                              |             |
| <i>Gm8801</i> |               |               | <i>Gm8801</i> |                              |             |
| <i>Gm8817</i> |               | <i>Gm8817</i> |               |                              |             |
| <i>Gm884</i>  |               | <i>Gm884</i>  |               |                              |             |
| <i>Gm8882</i> |               | <i>Gm8882</i> |               |                              |             |
| <i>Gm8883</i> | <i>Gm8883</i> |               | <i>Gm8883</i> |                              |             |
| <i>Gm8989</i> |               | <i>Gm8989</i> |               |                              |             |
| <i>Gm9</i>    | <i>Gm9</i>    | <i>Gm9</i>    |               |                              |             |
| <i>Gm9047</i> |               | <i>Gm9047</i> |               |                              |             |
| <i>Gm9054</i> | <i>Gm9054</i> | <i>Gm9054</i> | <i>Gm9054</i> |                              |             |
| <i>Gm9079</i> | <i>Gm9079</i> |               |               |                              |             |
| <i>Gm9125</i> | <i>Gm9125</i> | <i>Gm9125</i> | <i>Gm9125</i> |                              |             |
| <i>Gm9268</i> |               |               | <i>Gm9268</i> |                              |             |
| <i>Gm9376</i> |               | <i>Gm9376</i> |               |                              |             |
| <i>Gm9513</i> |               | <i>Gm9513</i> |               |                              |             |
| <i>Gm9573</i> |               | <i>Gm9573</i> |               |                              |             |
| <i>Gm9696</i> |               |               | <i>Gm9696</i> |                              |             |
| <i>Gm9731</i> |               | <i>Gm9731</i> |               |                              |             |
| <i>Gm9733</i> |               | <i>Gm9733</i> | <i>Gm9733</i> |                              |             |
| <i>Gm9758</i> | <i>Gm9758</i> | <i>Gm9758</i> | <i>Gm9758</i> |                              |             |
| <i>Gm9767</i> | <i>Gm9767</i> |               | <i>Gm9767</i> |                              |             |
| <i>Gm9776</i> | <i>Gm9776</i> | <i>Gm9776</i> | <i>Gm9776</i> |                              |             |
| <i>Gm9833</i> |               | <i>Gm9833</i> | <i>Gm9833</i> |                              |             |
| <i>Gm9839</i> |               |               | <i>Gm9839</i> |                              |             |
| <i>Gm9855</i> | <i>Gm9855</i> |               |               |                              |             |
| <i>Gm9920</i> | <i>Gm9920</i> |               |               |                              |             |
| <i>Gm9926</i> | <i>Gm9926</i> | <i>Gm9926</i> |               |                              |             |
| <i>Gm9958</i> |               | <i>Gm9958</i> | <i>Gm9958</i> |                              |             |
| <i>Gm9999</i> |               |               | <i>Gm9999</i> |                              |             |
| <i>Gmds</i>   | <i>Gmds</i>   |               |               |                              |             |
| <i>Gmeb1</i>  |               | <i>Gmeb1</i>  |               | <i>Gmeb1</i>                 |             |
| <i>Gmfb</i>   | <i>Gmfb</i>   |               |               |                              |             |
| <i>Gmfg</i>   |               | <i>Gmfg</i>   | <i>Gmfg</i>   |                              |             |
| <i>Gmip</i>   |               |               | <i>Gmip</i>   |                              |             |
| <i>Gmnn</i>   |               |               | <i>Gmnn</i>   |                              |             |
| <i>Gmppb</i>  | <i>Gmppb</i>  | <i>Gmppb</i>  | <i>Gmppb</i>  |                              |             |
| <i>Gmpr</i>   | <i>Gmpr</i>   |               |               |                              |             |
| <i>Gmpr2</i>  | <i>Gmpr2</i>  |               |               |                              |             |
| <i>Gmps</i>   | <i>Gmps</i>   |               |               |                              |             |
| <i>Gna12</i>  |               | <i>Gna12</i>  |               |                              |             |
| <i>Gna13</i>  |               | <i>Gna13</i>  |               |                              |             |
| <i>Gnao1</i>  | <i>Gnao1</i>  |               |               |                              |             |
| <i>Gnaq</i>   |               |               | <i>Gnaq</i>   |                              | <i>Gnaq</i> |
| <i>Gnas</i>   |               | <i>Gnas</i>   | <i>Gnas</i>   |                              |             |
| <i>Gnat2</i>  |               |               | <i>Gnat2</i>  |                              |             |
| <i>Gnat3</i>  | <i>Gnat3</i>  |               |               |                              |             |
| <i>Gnb1</i>   |               |               | <i>Gnb1</i>   |                              | <i>Gnb1</i> |



Suppl. Table 1  
(81/234)

|                 | ChIP-Seq hits |         |          | Unique hits with interactors |          |
|-----------------|---------------|---------|----------|------------------------------|----------|
|                 | unstimulated  | Ac      | LPS      | Ac                           | LPS      |
| <i>Gnb1l</i>    | Gnb1l         | Gnb1l   | Gnb1l    |                              |          |
| <i>Gnb2l1</i>   |               |         | Gnb2l1   |                              |          |
| <i>Gnb3</i>     |               | Gnb3    |          |                              |          |
| <i>Gng10</i>    |               |         | Gng10    |                              |          |
| <i>Gng11</i>    |               | Gng11   | Gng11    |                              |          |
| <i>Gng12</i>    | Gng12         | Gng12   |          |                              |          |
| <i>Gng13</i>    |               | Gng13   |          |                              |          |
| <i>Gng3</i>     |               |         | Gng3     |                              |          |
| <i>Gng5</i>     |               |         | Gng5     |                              |          |
| <i>Gng8</i>     |               | Gng8    | Gng8     |                              |          |
| <i>Gngt2</i>    |               | Gngt2   |          |                              |          |
| <i>Gnl1</i>     |               |         | Gnl1     |                              | Gnl1     |
| <i>Gnl3</i>     | Gnl3          |         |          |                              |          |
| <i>Gnl3l</i>    |               |         | Gnl3l    |                              | Gnl3l    |
| <i>Gnpat</i>    |               | Gnpat   |          | Gnpat                        |          |
| <i>Gnpda2</i>   |               |         | Gnpda2   |                              |          |
| <i>Gnpnat1</i>  |               |         | Gnpnat1  |                              |          |
| <i>Gnrhr</i>    |               | Gnrhr   |          | Gnrhr                        |          |
| <i>Golga1</i>   |               | Golga1  | Golga1   |                              |          |
| <i>Golga3</i>   |               |         | Golga3   |                              |          |
| <i>Golga5</i>   |               |         | Golga5   |                              |          |
| <i>Golga7</i>   |               | Golga7  |          |                              |          |
| <i>Golgb1</i>   | Golgb1        | Golgb1  | Golgb1   |                              |          |
| <i>Golim4</i>   |               |         | Golim4   |                              |          |
| <i>Golm1</i>    |               | Golm1   |          |                              |          |
| <i>Golph3</i>   |               |         | Golph3   |                              |          |
| <i>Golt1a</i>   |               |         | Golt1a   |                              | Golt1a   |
| <i>Gon4l</i>    | Gon4l         | Gon4l   | Gon4l    |                              |          |
| <i>Gorasp2</i>  | Gorasp2       |         |          |                              |          |
| <i>Gosr1</i>    | Gosr1         | Gosr1   | Gosr1    |                              |          |
| <i>Gosr2</i>    |               |         | Gosr2    |                              |          |
| <i>Got1</i>     |               | Got1    |          |                              |          |
| <i>Got1l1</i>   |               |         | Got1l1   |                              |          |
| <i>Got2</i>     | Got2          |         | Got2     |                              |          |
| <i>Gp1ba</i>    | Gp1ba         |         | Gp1ba    |                              |          |
| <i>Gp5</i>      |               | Gp5     |          |                              |          |
| <i>Gp6</i>      | Gp6           | Gp6     | Gp6      |                              |          |
| <i>Gpa33</i>    |               |         | Gpa33    |                              |          |
| <i>Gpaa1</i>    |               |         | Gpaa1    |                              |          |
| <i>Gpalpp1</i>  |               |         | Gpalpp1  |                              | Gpalpp1  |
| <i>Gpank1</i>   | Gpank1        |         |          |                              |          |
| <i>Gpatch1</i>  |               |         | Gpatch1  |                              |          |
| <i>Gpatch11</i> |               |         | Gpatch11 |                              | Gpatch11 |
| <i>Gpatch4</i>  |               | Gpatch4 | Gpatch4  |                              |          |
| <i>Gpatch8</i>  |               | Gpatch8 | Gpatch8  |                              |          |
| <i>Gpbar1</i>   |               |         | Gpbar1   |                              |          |
| <i>Gpbp1</i>    |               | Gpbp1   | Gpbp1    |                              |          |
| <i>Gpc1</i>     |               | Gpc1    | Gpc1     |                              |          |
| <i>Gpc2</i>     |               | Gpc2    |          |                              |          |

Suppl. Table 1  
(82/234)

|                | CHIP-Seq hits |                |                | Unique hits with interactors |               |
|----------------|---------------|----------------|----------------|------------------------------|---------------|
|                | unstimulated  | Ac             | LPS            | Ac                           | LPS           |
| <i>Gpc4</i>    |               |                | <i>Gpc4</i>    |                              |               |
| <i>Gpc5</i>    |               |                | <i>Gpc5</i>    |                              |               |
| <i>Gpc6</i>    |               |                | <i>Gpc6</i>    |                              |               |
| <i>Gpcpd1</i>  | <i>Gpcpd1</i> | <i>Gpcpd1</i>  |                |                              |               |
| <i>Gpd1</i>    |               |                | <i>Gpd1</i>    |                              |               |
| <i>Gpd1l</i>   | <i>Gpd1l</i>  |                |                |                              |               |
| <i>Gphn</i>    | <i>Gphn</i>   | <i>Gphn</i>    |                |                              |               |
| <i>Gpi1</i>    |               |                | <i>Gpi1</i>    |                              | <i>Gpi1</i>   |
| <i>Gpkow</i>   |               | <i>Gpkow</i>   | <i>Gpkow</i>   |                              |               |
| <i>Gpld1</i>   |               | <i>Gpld1</i>   | <i>Gpld1</i>   |                              |               |
| <i>Gpm6a</i>   |               |                | <i>Gpm6a</i>   |                              |               |
| <i>Gpn1</i>    |               |                | <i>Gpn1</i>    |                              |               |
| <i>Gpn2</i>    |               | <i>Gpn2</i>    | <i>Gpn2</i>    |                              |               |
| <i>Gpr1</i>    |               |                | <i>Gpr1</i>    |                              |               |
| <i>Gpr101</i>  |               |                | <i>Gpr101</i>  |                              |               |
| <i>Gpr108</i>  |               |                | <i>Gpr108</i>  |                              |               |
| <i>Gpr119</i>  |               | <i>Gpr119</i>  |                |                              |               |
| <i>Gpr12</i>   |               | <i>Gpr12</i>   |                | <i>Gpr12</i>                 |               |
| <i>Gpr132</i>  | <i>Gpr132</i> |                |                |                              |               |
| <i>Gpr137b</i> |               |                | <i>Gpr137b</i> |                              |               |
| <i>Gpr137c</i> |               | <i>Gpr137c</i> |                |                              |               |
| <i>Gpr141</i>  |               | <i>Gpr141</i>  |                |                              |               |
| <i>Gpr142</i>  |               | <i>Gpr142</i>  |                |                              |               |
| <i>Gpr149</i>  |               |                | <i>Gpr149</i>  |                              |               |
| <i>Gpr15</i>   |               | <i>Gpr15</i>   |                |                              |               |
| <i>Gpr150</i>  |               | <i>Gpr150</i>  |                |                              |               |
| <i>Gpr151</i>  |               | <i>Gpr151</i>  |                |                              |               |
| <i>Gpr155</i>  |               |                | <i>Gpr155</i>  |                              | <i>Gpr155</i> |
| <i>Gpr157</i>  |               | <i>Gpr157</i>  | <i>Gpr157</i>  |                              |               |
| <i>Gpr158</i>  |               | <i>Gpr158</i>  |                |                              |               |
| <i>Gpr160</i>  |               | <i>Gpr160</i>  |                |                              |               |
| <i>Gpr161</i>  |               |                | <i>Gpr161</i>  |                              |               |
| <i>Gpr17</i>   |               | <i>Gpr17</i>   |                |                              |               |
| <i>Gpr171</i>  | <i>Gpr171</i> |                | <i>Gpr171</i>  |                              |               |
| <i>Gpr176</i>  |               |                | <i>Gpr176</i>  |                              |               |
| <i>Gpr179</i>  |               | <i>Gpr179</i>  |                |                              |               |
| <i>Gpr180</i>  | <i>Gpr180</i> |                | <i>Gpr180</i>  |                              |               |
| <i>Gpr182</i>  |               |                | <i>Gpr182</i>  |                              |               |
| <i>Gpr19</i>   | <i>Gpr19</i>  |                | <i>Gpr19</i>   |                              |               |
| <i>Gpr21</i>   |               |                | <i>Gpr21</i>   |                              |               |
| <i>Gpr22</i>   | <i>Gpr22</i>  | <i>Gpr22</i>   |                |                              |               |
| <i>Gpr25</i>   |               | <i>Gpr25</i>   | <i>Gpr25</i>   |                              |               |
| <i>Gpr31b</i>  |               | <i>Gpr31b</i>  |                |                              |               |
| <i>Gpr35</i>   |               | <i>Gpr35</i>   | <i>Gpr35</i>   |                              |               |
| <i>Gpr55</i>   | <i>Gpr55</i>  |                |                |                              |               |
| <i>Gpr62</i>   |               |                | <i>Gpr62</i>   |                              |               |
| <i>Gpr65</i>   |               |                | <i>Gpr65</i>   |                              |               |
| <i>Gpr82</i>   |               | <i>Gpr82</i>   |                |                              |               |
| <i>Gpr85</i>   | <i>Gpr85</i>  | <i>Gpr85</i>   | <i>Gpr85</i>   |                              |               |

Suppl. Table 1  
(83/234)

|                | ChIP-Seq hits |         |         | Unique hits with interactors |         |
|----------------|---------------|---------|---------|------------------------------|---------|
|                | unstimulated  | Ac      | LPS     | Ac                           | LPS     |
| <i>Gpr88</i>   | Gpr88         | Gpr88   | Gpr88   |                              |         |
| <i>Gprasp1</i> |               |         | Gprasp1 |                              |         |
| <i>Gprasp2</i> |               |         | Gprasp2 |                              |         |
| <i>Gprc5c</i>  |               |         | Gprc5c  |                              | Gprc5c  |
| <i>Gprc5d</i>  | Gprc5d        | Gprc5d  | Gprc5d  |                              |         |
| <i>Gprc6a</i>  |               | Gprc6a  |         |                              |         |
| <i>Gps1</i>    |               | Gps1    |         |                              |         |
| <i>Gpsm2</i>   |               | Gpsm2   |         |                              |         |
| <i>Gpsm3</i>   | Gpsm3         |         |         |                              |         |
| <i>Gpt</i>     |               | Gpt     |         |                              |         |
| <i>Gpt2</i>    |               |         | Gpt2    |                              |         |
| <i>Gpx1</i>    |               |         | Gpx1    |                              |         |
| <i>Gpx3</i>    |               |         | Gpx3    |                              |         |
| <i>Gramd1b</i> |               |         | Gramd1b |                              | Gramd1b |
| <i>Gramd1c</i> |               | Gramd1c |         | Gramd1c                      |         |
| <i>Gramd3</i>  | Gramd3        | Gramd3  | Gramd3  |                              |         |
| <i>Grap2</i>   |               | Grap2   |         | Grap2                        |         |
| <i>Grasp</i>   | Grasp         |         |         |                              |         |
| <i>Grb10</i>   | Grb10         | Grb10   |         |                              |         |
| <i>Grb14</i>   |               | Grb14   |         |                              |         |
| <i>Grb2</i>    |               | Grb2    |         | Grb2                         |         |
| <i>Grb7</i>    |               | Grb7    | Grb7    |                              |         |
| <i>Greb1</i>   |               | Greb1   |         | Greb1                        |         |
| <i>Greb1l</i>  | Greb1l        |         |         |                              |         |
| <i>Grhl1</i>   |               |         | Grhl1   |                              |         |
| <i>Grhpr</i>   |               | Grhpr   |         |                              |         |
| <i>Gria1</i>   |               | Gria1   |         |                              |         |
| <i>Gria3</i>   |               | Gria3   | Gria3   |                              |         |
| <i>Grid1</i>   |               | Grid1   |         |                              |         |
| <i>Grid2ip</i> |               | Grid2ip |         |                              |         |
| <i>Grifin</i>  |               |         | Grifin  |                              |         |
| <i>Grik1</i>   |               | Grik1   | Grik1   |                              |         |
| <i>Grin1</i>   |               | Grin1   |         | Grin1                        |         |
| <i>Grin2c</i>  | Grin2c        |         |         |                              |         |
| <i>Grina</i>   | Grina         |         | Grina   |                              |         |
| <i>Grip1</i>   |               | Grip1   | Grip1   |                              |         |
| <i>Grk1</i>    | Grk1          |         |         |                              |         |
| <i>Grk5</i>    |               | Grk5    |         |                              |         |
| <i>Grk6</i>    |               | Grk6    | Grk6    |                              |         |
| <i>Grm1</i>    |               | Grm1    | Grm1    |                              |         |
| <i>Grm2</i>    |               |         | Grm2    |                              |         |
| <i>Grm5</i>    |               | Grm5    |         |                              |         |
| <i>Grm6</i>    |               | Grm6    |         |                              |         |
| <i>Grm7</i>    | Grm7          |         |         |                              |         |
| <i>Grn</i>     |               | Grn     | Grn     |                              |         |
| <i>Grpel1</i>  |               | Grpel1  | Grpel1  |                              |         |
| <i>Grsf1</i>   |               | Grsf1   |         |                              |         |
| <i>Grtp1</i>   | Grtp1         |         |         |                              |         |
| <i>Gsdma</i>   |               | Gsdma   | Gsdma   |                              |         |

Suppl. Table 1  
(84/234)

|                 | CHIP-Seq hits |          |          | Unique hits with interactors |       |
|-----------------|---------------|----------|----------|------------------------------|-------|
|                 | unstimulated  | Ac       | LPS      | Ac                           | LPS   |
| <i>Gsdmc4</i>   | Gsdmc4        |          |          |                              |       |
| <i>Gsdmd</i>    | Gsdmd         | Gsdmd    |          |                              |       |
| <i>Gsg1</i>     | Gsg1          |          | Gsg1     |                              |       |
| <i>Gsg1l</i>    | Gsg1l         |          | Gsg1l    |                              |       |
| <i>Gsg2</i>     | Gsg2          |          | Gsg2     |                              |       |
| <i>Gsk3a</i>    | Gsk3a         | Gsk3a    |          |                              |       |
| <i>Gskip</i>    |               |          | Gskip    |                              | Gskip |
| <i>Gspt1</i>    | Gspt1         |          |          |                              |       |
| <i>Gspt2</i>    |               |          | Gspt2    |                              |       |
| <i>Gsr</i>      |               |          | Gsr      |                              |       |
| <i>Gsta2</i>    |               | Gsta2    |          |                              |       |
| <i>Gsta3</i>    |               | Gsta3    | Gsta3    |                              |       |
| <i>Gstcd</i>    |               | Gstcd    |          |                              |       |
| <i>Gstk1</i>    |               |          | Gstk1    |                              |       |
| <i>Gstm1</i>    |               |          | Gstm1    |                              |       |
| <i>Gstm4</i>    |               |          | Gstm4    |                              |       |
| <i>Gstm7</i>    | Gstm7         | Gstm7    | Gstm7    |                              |       |
| <i>Gstp1</i>    | Gstp1         |          | Gstp1    |                              |       |
| <i>Gstp2</i>    |               |          | Gstp2    |                              |       |
| <i>Gstt3</i>    |               |          | Gstt3    |                              | Gstt3 |
| <i>Gtf2a1</i>   | Gtf2a1        | Gtf2a1   | Gtf2a1   |                              |       |
| <i>Gtf2a1l</i>  |               | Gtf2a1l  |          | Gtf2a1l                      |       |
| <i>Gtf2a2</i>   | Gtf2a2        | Gtf2a2   | Gtf2a2   |                              |       |
| <i>Gtf2b</i>    | Gtf2b         | Gtf2b    | Gtf2b    |                              |       |
| <i>Gtf2e1</i>   |               |          | Gtf2e1   |                              |       |
| <i>Gtf2f1</i>   |               | Gtf2f1   |          |                              |       |
| <i>Gtf2f2</i>   |               | Gtf2f2   |          |                              |       |
| <i>Gtf2h1</i>   | Gtf2h1        | Gtf2h1   | Gtf2h1   |                              |       |
| <i>Gtf2h3</i>   |               | Gtf2h3   | Gtf2h3   |                              |       |
| <i>Gtf2i</i>    |               | Gtf2i    | Gtf2i    |                              |       |
| <i>Gtf2ird2</i> | Gtf2ird2      | Gtf2ird2 | Gtf2ird2 |                              |       |
| <i>Gtf3c2</i>   |               |          | Gtf3c2   |                              |       |
| <i>Gtf3c3</i>   |               | Gtf3c3   | Gtf3c3   |                              |       |
| <i>Gtpbp10</i>  |               |          | Gtpbp10  |                              |       |
| <i>Gtpbp2</i>   | Gtpbp2        | Gtpbp2   |          |                              |       |
| <i>Gtpbp4</i>   |               |          | Gtpbp4   |                              |       |
| <i>Gtse1</i>    |               | Gtse1    | Gtse1    |                              |       |
| <i>Gucd1</i>    |               | Gucd1    |          |                              |       |
| <i>Gucy1a2</i>  | Gucy1a2       |          |          |                              |       |
| <i>Gucy1b2</i>  | Gucy1b2       | Gucy1b2  |          |                              |       |
| <i>Gucy1b3</i>  | Gucy1b3       |          |          |                              |       |
| <i>Gucy2c</i>   |               | Gucy2c   |          |                              |       |
| <i>Gucy2e</i>   |               |          | Gucy2e   |                              |       |
| <i>Guf1</i>     |               |          | Guf1     |                              |       |
| <i>Guk1</i>     |               |          | Guk1     |                              |       |
| <i>Gxylt1</i>   |               | Gxylt1   | Gxylt1   |                              |       |
| <i>Gyg</i>      |               | Gyg      |          |                              |       |
| <i>Gyk</i>      |               | Gyk      |          |                              |       |
| <i>Gykl1</i>    | Gykl1         |          |          |                              |       |

Suppl. Table 1  
(85/234)

|                 | CHIP-Seq hits |          |          | Unique hits with interactors |       |
|-----------------|---------------|----------|----------|------------------------------|-------|
|                 | unstimulated  | Ac       | LPS      | Ac                           | LPS   |
| <i>Gypa</i>     | Gypa          |          |          |                              |       |
| <i>Gypc</i>     |               | Gypc     |          |                              |       |
| <i>Gys2</i>     | Gys2          |          |          |                              |       |
| <i>Gzf1</i>     |               | Gzf1     |          |                              |       |
| <i>Gzmd</i>     | Gzmd          | Gzmd     | Gzmd     |                              |       |
| <i>Gzme</i>     |               | Gzme     |          |                              |       |
| <i>Gzmm</i>     | Gzmm          | Gzmm     | Gzmm     |                              |       |
| <i>H13</i>      |               |          | H13      |                              |       |
| <i>H1fnt</i>    |               |          | H1fnt    |                              |       |
| <i>H1foo</i>    |               | H1foo    | H1foo    |                              |       |
| <i>H2-Ab1</i>   |               |          | H2-Ab1   |                              |       |
| <i>H2afb1</i>   |               |          | H2afb1   |                              |       |
| <i>H2afx</i>    | H2afx         | H2afx    | H2afx    |                              |       |
| <i>H2afy</i>    |               | H2afy    | H2afy    |                              |       |
| <i>H2afz</i>    |               | H2afz    | H2afz    |                              |       |
| <i>H2-D1</i>    |               |          | H2-D1    |                              | H2-D1 |
| <i>H2-DMb1</i>  |               | H2-DMb1  |          |                              |       |
| <i>H2-DMb2</i>  |               | H2-DMb2  |          |                              |       |
| <i>H2-Ea-ps</i> |               | H2-Ea-ps | H2-Ea-ps |                              |       |
| <i>H2-K1</i>    |               | H2-K1    | H2-K1    |                              |       |
| <i>H2-K2</i>    | H2-K2         |          |          |                              |       |
| <i>H2-Ke6</i>   |               | H2-Ke6   |          |                              |       |
| <i>H2-L</i>     |               |          | H2-L     |                              | H2-L  |
| <i>H2-M1</i>    |               | H2-M1    |          |                              |       |
| <i>H2-M10.2</i> |               | H2-M10.2 |          |                              |       |
| <i>H2-M10.4</i> | H2-M10.4      |          |          |                              |       |
| <i>H2-M10.5</i> |               | H2-M10.5 |          |                              |       |
| <i>H2-M11</i>   |               | H2-M11   |          |                              |       |
| <i>H2-M2</i>    |               | H2-M2    |          |                              |       |
| <i>H2-M3</i>    |               | H2-M3    | H2-M3    |                              |       |
| <i>H2-Q1</i>    |               | H2-Q1    |          |                              |       |
| <i>H2-Q10</i>   | H2-Q10        |          | H2-Q10   |                              |       |
| <i>H2-Q2</i>    |               |          | H2-Q2    |                              |       |
| <i>H2-Q4</i>    | H2-Q4         | H2-Q4    | H2-Q4    |                              |       |
| <i>H2-Q5</i>    | H2-Q5         |          | H2-Q5    |                              |       |
| <i>H2-Q6</i>    |               |          | H2-Q6    |                              |       |
| <i>H2-Q7</i>    | H2-Q7         | H2-Q7    | H2-Q7    |                              |       |
| <i>H2-Q8</i>    |               |          | H2-Q8    |                              |       |
| <i>H2-Q9</i>    | H2-Q9         | H2-Q9    | H2-Q9    |                              |       |
| <i>H2-T22</i>   | H2-T22        |          | H2-T22   |                              |       |
| <i>H2-T24</i>   |               | H2-T24   |          | H2-T24                       |       |
| <i>H2-T3</i>    |               |          | H2-T3    |                              | H2-T3 |
| <i>H2-T9</i>    | H2-T9         |          | H2-T9    |                              |       |
| <i>H3f3a</i>    |               | H3f3a    |          |                              |       |
| <i>H3f3b</i>    |               |          | H3f3b    |                              |       |
| <i>H60b</i>     |               |          | H60b     |                              |       |
| <i>H6pd</i>     |               |          | H6pd     |                              |       |
| <i>Hacd1</i>    |               | Hacd1    |          |                              |       |
| <i>Hacd2</i>    |               |          | Hacd2    |                              |       |

Suppl. Table 1  
(86/234)

|                | ChIP-Seq hits |                |                | Unique hits with interactors |              |
|----------------|---------------|----------------|----------------|------------------------------|--------------|
|                | unstimulated  | Ac             | LPS            | Ac                           | LPS          |
| <i>Hacd3</i>   |               |                | <i>Hacd3</i>   |                              | <i>Hacd3</i> |
| <i>Hacd4</i>   |               | <i>Hacd4</i>   | <i>Hacd4</i>   |                              |              |
| <i>Hace1</i>   | <i>Hace1</i>  |                |                |                              |              |
| <i>Hadha</i>   |               |                | <i>Hadha</i>   |                              |              |
| <i>Hagh</i>    |               |                | <i>Hagh</i>    |                              |              |
| <i>Hal</i>     | <i>Hal</i>    |                |                |                              |              |
| <i>Halr1</i>   |               |                | <i>Halr1</i>   |                              |              |
| <i>Hand2</i>   |               | <i>Hand2</i>   | <i>Hand2</i>   |                              |              |
| <i>Hao1</i>    | <i>Hao1</i>   |                |                |                              |              |
| <i>Hao2</i>    |               | <i>Hao2</i>    | <i>Hao2</i>    |                              |              |
| <i>Hap1</i>    |               | <i>Hap1</i>    | <i>Hap1</i>    |                              |              |
| <i>Hapln3</i>  |               | <i>Hapln3</i>  | <i>Hapln3</i>  |                              |              |
| <i>Harbi1</i>  |               | <i>Harbi1</i>  |                |                              |              |
| <i>Hars2</i>   | <i>Hars2</i>  | <i>Hars2</i>   |                |                              |              |
| <i>Has2</i>    | <i>Has2</i>   | <i>Has2</i>    |                |                              |              |
| <i>Haus2</i>   |               | <i>Haus2</i>   | <i>Haus2</i>   |                              |              |
| <i>Haus3</i>   | <i>Haus3</i>  | <i>Haus3</i>   | <i>Haus3</i>   |                              |              |
| <i>Haus5</i>   | <i>Haus5</i>  |                |                |                              |              |
| <i>Haus8</i>   |               | <i>Haus8</i>   |                |                              |              |
| <i>Havcr1</i>  |               |                | <i>Havcr1</i>  |                              |              |
| <i>Hba-a1</i>  |               | <i>Hba-a1</i>  |                | <i>Hba-a1</i>                |              |
| <i>Hba-a2</i>  |               | <i>Hba-a2</i>  |                |                              |              |
| <i>Hbb-b2</i>  |               |                | <i>Hbb-b2</i>  |                              |              |
| <i>Hbb-bt</i>  |               |                | <i>Hbb-bt</i>  |                              |              |
| <i>Hbb-y</i>   |               | <i>Hbb-y</i>   |                |                              |              |
| <i>Hbegf</i>   |               | <i>Hbegf</i>   |                | <i>Hbegf</i>                 |              |
| <i>Hbs1l</i>   |               |                | <i>Hbs1l</i>   |                              |              |
| <i>Hcar2</i>   |               |                | <i>Hcar2</i>   |                              |              |
| <i>Hcfc2</i>   |               | <i>Hcfc2</i>   |                |                              |              |
| <i>Hck</i>     |               | <i>Hck</i>     |                | <i>Hck</i>                   |              |
| <i>Hcls1</i>   | <i>Hcls1</i>  | <i>Hcls1</i>   |                |                              |              |
| <i>Hcn3</i>    | <i>Hcn3</i>   | <i>Hcn3</i>    | <i>Hcn3</i>    |                              |              |
| <i>Hcrtr1</i>  |               | <i>Hcrtr1</i>  |                |                              |              |
| <i>Hcrtr2</i>  |               |                | <i>Hcrtr2</i>  |                              |              |
| <i>Hdac1</i>   |               |                | <i>Hdac1</i>   |                              | <i>Hdac1</i> |
| <i>Hdac11</i>  |               | <i>Hdac11</i>  | <i>Hdac11</i>  |                              |              |
| <i>Hdac5</i>   |               | <i>Hdac5</i>   |                |                              |              |
| <i>Hdac6</i>   |               |                | <i>Hdac6</i>   |                              |              |
| <i>Hdac9</i>   | <i>Hdac9</i>  |                |                |                              |              |
| <i>Hdgf</i>    |               | <i>Hdgf</i>    | <i>Hdgf</i>    |                              |              |
| <i>Hdhd1a</i>  | <i>Hdhd1a</i> |                |                |                              |              |
| <i>Hdhd2</i>   | <i>Hdhd2</i>  |                |                |                              |              |
| <i>Hdlbp</i>   |               |                | <i>Hdlbp</i>   |                              |              |
| <i>Hdx</i>     |               |                | <i>Hdx</i>     |                              |              |
| <i>Heatr1</i>  |               | <i>Heatr1</i>  |                |                              |              |
| <i>Heatr5a</i> |               | <i>Heatr5a</i> |                |                              |              |
| <i>Heatr5b</i> |               |                | <i>Heatr5b</i> |                              |              |
| <i>Heatr9</i>  | <i>Heatr9</i> | <i>Heatr9</i>  | <i>Heatr9</i>  |                              |              |
| <i>Hebp1</i>   |               |                | <i>Hebp1</i>   |                              |              |

Suppl. Table 1  
(87/234)

|                | CHIP-Seq hits |         |        | Unique hits with interactors |       |
|----------------|---------------|---------|--------|------------------------------|-------|
|                | unstimulated  | Ac      | LPS    | Ac                           | LPS   |
| <i>Hebp2</i>   |               |         | Hebp2  |                              |       |
| <i>Heca</i>    |               | Heca    |        |                              |       |
| <i>Hectd2</i>  | Hectd2        |         |        |                              |       |
| <i>Hecw2</i>   |               | Hecw2   |        |                              |       |
| <i>Heg1</i>    |               |         | Heg1   |                              | Heg1  |
| <i>Helb</i>    |               |         | Helb   |                              | Helb  |
| <i>Hells</i>   |               |         | Hells  |                              |       |
| <i>Helq</i>    |               |         | Helq   |                              | Helq  |
| <i>Helt</i>    |               | Helt    |        |                              |       |
| <i>Helz</i>    |               | Helz    |        |                              |       |
| <i>Helz2</i>   |               |         | Helz2  |                              |       |
| <i>Henmt1</i>  |               | Henmt1  |        |                              |       |
| <i>Herc1</i>   |               |         | Herc1  |                              |       |
| <i>Herc3</i>   |               |         | Herc3  |                              | Herc3 |
| <i>Herc4</i>   |               | Herc4   |        |                              |       |
| <i>Herpud2</i> |               | Herpud2 |        |                              |       |
| <i>Hes1</i>    |               | Hes1    |        | Hes1                         |       |
| <i>Hes2</i>    |               |         | Hes2   |                              |       |
| <i>Hes5</i>    |               |         | Hes5   |                              |       |
| <i>Hes6</i>    | Hes6          |         |        |                              |       |
| <i>Hesx1</i>   |               | Hesx1   |        |                              |       |
| <i>Hexb</i>    |               | Hexb    |        |                              |       |
| <i>Hexim2</i>  | Hexim2        |         | Hexim2 |                              |       |
| <i>Hfe</i>     |               |         | Hfe    |                              |       |
| <i>Hfm1</i>    | Hfm1          |         |        |                              |       |
| <i>Hgd</i>     |               | Hgd     | Hgd    |                              |       |
| <i>Hgf</i>     |               |         | Hgf    |                              | Hgf   |
| <i>Hgfac</i>   |               | Hgfac   |        |                              |       |
| <i>Hgh1</i>    | Hgh1          |         | Hgh1   |                              |       |
| <i>Hgsnat</i>  |               | Hgsnat  | Hgsnat |                              |       |
| <i>Hhip</i>    | Hhip          |         |        |                              |       |
| <i>Hhipl2</i>  |               | Hhipl2  |        |                              |       |
| <i>Hiat1</i>   |               | Hiat1   | Hiat1  |                              |       |
| <i>Hiatl1</i>  | Hiatl1        | Hiatl1  |        |                              |       |
| <i>Hic2</i>    | Hic2          | Hic2    |        |                              |       |
| <i>Hid1</i>    |               | Hid1    |        |                              |       |
| <i>Hif1a</i>   |               | Hif1a   |        | Hif1a                        |       |
| <i>Hif1an</i>  |               | Hif1an  | Hif1an |                              |       |
| <i>Hif3a</i>   | Hif3a         |         |        |                              |       |
| <i>Hils1</i>   |               | Hils1   |        |                              |       |
| <i>Hint1</i>   |               |         | Hint1  |                              |       |
| <i>Hint3</i>   |               | Hint3   |        |                              |       |
| <i>Hip1</i>    | Hip1          |         | Hip1   |                              |       |
| <i>Hip1r</i>   | Hip1r         | Hip1r   | Hip1r  |                              |       |
| <i>Hipk1</i>   |               | Hipk1   | Hipk1  |                              |       |
| <i>Hipk2</i>   |               | Hipk2   | Hipk2  |                              |       |
| <i>Hipk3</i>   |               | Hipk3   | Hipk3  |                              |       |
| <i>Hipk4</i>   |               | Hipk4   |        |                              |       |
| <i>Hira</i>    | Hira          | Hira    | Hira   |                              |       |

Suppl. Table 1  
(88/234)

|                  | CHIP-Seq hits |           |           | Unique hits with interactors |           |
|------------------|---------------|-----------|-----------|------------------------------|-----------|
|                  | unstimulated  | Ac        | LPS       | Ac                           | LPS       |
| <i>Hist1h1a</i>  |               | Hist1h1a  |           |                              |           |
| <i>Hist1h1b</i>  |               | Hist1h1b  |           |                              |           |
| <i>Hist1h1c</i>  |               |           | Hist1h1c  |                              |           |
| <i>Hist1h1e</i>  | Hist1h1e      |           |           |                              |           |
| <i>Hist1h1t</i>  |               |           | Hist1h1t  |                              |           |
| <i>Hist1h2aa</i> |               |           | Hist1h2aa |                              |           |
| <i>Hist1h2ab</i> |               | Hist1h2ab | Hist1h2ab |                              |           |
| <i>Hist1h2ac</i> |               | Hist1h2ac |           |                              |           |
| <i>Hist1h2ad</i> | Hist1h2ad     |           |           |                              |           |
| <i>Hist1h2ae</i> | Hist1h2ae     |           |           |                              |           |
| <i>Hist1h2af</i> |               |           | Hist1h2af |                              |           |
| <i>Hist1h2ah</i> |               |           | Hist1h2ah |                              |           |
| <i>Hist1h2ak</i> |               | Hist1h2ak |           |                              |           |
| <i>Hist1h2an</i> | Hist1h2an     |           | Hist1h2an |                              |           |
| <i>Hist1h2ao</i> |               | Hist1h2ao | Hist1h2ao |                              |           |
| <i>Hist1h2ap</i> |               | Hist1h2ap | Hist1h2ap |                              |           |
| <i>Hist1h2ba</i> |               | Hist1h2ba |           |                              |           |
| <i>Hist1h2bb</i> | Hist1h2bb     | Hist1h2bb |           |                              |           |
| <i>Hist1h2be</i> | Hist1h2be     | Hist1h2be | Hist1h2be |                              |           |
| <i>Hist1h2bf</i> |               |           | Hist1h2bf |                              |           |
| <i>Hist1h2bk</i> |               |           | Hist1h2bk |                              |           |
| <i>Hist1h2bl</i> |               | Hist1h2bl | Hist1h2bl |                              |           |
| <i>Hist1h2bm</i> |               | Hist1h2bm | Hist1h2bm |                              |           |
| <i>Hist1h2bn</i> |               | Hist1h2bn |           |                              |           |
| <i>Hist1h3b</i>  | Hist1h3b      |           | Hist1h3b  |                              |           |
| <i>Hist1h3c</i>  |               | Hist1h3c  | Hist1h3c  |                              |           |
| <i>Hist1h3d</i>  | Hist1h3d      |           |           |                              |           |
| <i>Hist1h3e</i>  |               |           | Hist1h3e  |                              |           |
| <i>Hist1h3f</i>  |               |           | Hist1h3f  |                              |           |
| <i>Hist1h3g</i>  |               |           | Hist1h3g  |                              |           |
| <i>Hist1h4c</i>  | Hist1h4c      |           | Hist1h4c  |                              |           |
| <i>Hist1h4d</i>  |               |           | Hist1h4d  |                              |           |
| <i>Hist1h4h</i>  | Hist1h4h      |           | Hist1h4h  |                              |           |
| <i>Hist1h4j</i>  |               | Hist1h4j  |           |                              |           |
| <i>Hist1h4k</i>  |               | Hist1h4k  |           |                              |           |
| <i>Hist1h4m</i>  |               | Hist1h4m  | Hist1h4m  |                              |           |
| <i>Hist1h4n</i>  |               | Hist1h4n  | Hist1h4n  |                              |           |
| <i>Hist2h2ab</i> |               |           | Hist2h2ab |                              |           |
| <i>Hist2h2bb</i> |               |           | Hist2h2bb |                              |           |
| <i>Hist2h2be</i> |               |           | Hist2h2be |                              | Hist2h2be |
| <i>Hist2h3b</i>  |               |           | Hist2h3b  |                              |           |
| <i>Hist2h4</i>   |               |           | Hist2h4   |                              |           |
| <i>Hist3h2a</i>  |               | Hist3h2a  |           |                              |           |
| <i>Hist3h2ba</i> |               | Hist3h2ba | Hist3h2ba |                              |           |
| <i>Hivep1</i>    |               |           | Hivep1    |                              |           |
| <i>Hivep2</i>    |               |           | Hivep2    |                              |           |
| <i>Hjurp</i>     | Hjurp         |           |           |                              |           |
| <i>Hk1</i>       |               | Hk1       |           |                              |           |
| <i>Hk1os</i>     | Hk1os         |           |           |                              |           |



Suppl. Table 1  
(89/234)

|                   | CHIP-Seq hits |         |            | Unique hits with interactors |         |
|-------------------|---------------|---------|------------|------------------------------|---------|
|                   | unstimulated  | Ac      | LPS        | Ac                           | LPS     |
| <i>Hk2</i>        | Hk2           |         |            |                              |         |
| <i>Hkdc1</i>      |               |         | Hkdc1      |                              |         |
| <i>Hlcs</i>       |               | Hlcs    |            | Hlcs                         |         |
| <i>Hltf</i>       | Hltf          |         |            |                              |         |
| <i>Hlx</i>        |               |         | Hlx        |                              |         |
| <i>Hmbox1</i>     |               |         | Hmbox1     |                              |         |
| <i>Hmbs</i>       |               |         | Hmbs       |                              |         |
| <i>Hmces</i>      |               | Hmces   |            |                              |         |
| <i>Hmcn1</i>      |               | Hmcn1   | Hmcn1      |                              |         |
| <i>Hmg20a</i>     |               | Hmg20a  | Hmg20a     |                              |         |
| <i>Hmg20b</i>     |               |         | Hmg20b     |                              |         |
| <i>Hmgb1</i>      |               | Hmgb1   |            | Hmgb1                        |         |
| <i>Hmgb1-rs17</i> |               |         | Hmgb1-rs17 |                              |         |
| <i>Hmgb2</i>      |               | Hmgb2   |            | Hmgb2                        |         |
| <i>Hmgb3</i>      |               | Hmgb3   |            |                              |         |
| <i>Hmgcl</i>      |               |         | Hmgcl      |                              |         |
| <i>Hmgcr</i>      | Hmgcr         |         |            |                              |         |
| <i>Hmgn1</i>      | Hmgn1         |         | Hmgn1      |                              |         |
| <i>Hmgxb3</i>     |               |         | Hmgxb3     |                              |         |
| <i>Hmha1</i>      |               |         | Hmha1      |                              |         |
| <i>Hmmr</i>       |               | Hmmr    |            |                              |         |
| <i>Hmox2</i>      |               |         | Hmox2      |                              |         |
| <i>Hmx3</i>       |               | Hmx3    |            |                              |         |
| <i>Hn1</i>        |               | Hn1     | Hn1        |                              |         |
| <i>Hnf1b</i>      |               | Hnf1b   |            |                              |         |
| <i>Hnmt</i>       |               |         | Hnmt       |                              |         |
| <i>Hnrnpa0</i>    |               |         | Hnrnpa0    |                              |         |
| <i>Hnrnpa1</i>    | Hnrnpa1       | Hnrnpa1 |            |                              |         |
| <i>Hnrnpa3</i>    |               | Hnrnpa3 | Hnrnpa3    |                              |         |
| <i>Hnrnpab</i>    |               |         | Hnrnpab    |                              | Hnrnpab |
| <i>Hnrnpf</i>     |               | Hnrnpf  | Hnrnpf     |                              |         |
| <i>Hnrnph1</i>    |               | Hnrnph1 | Hnrnph1    |                              |         |
| <i>Hnrnph2</i>    |               | Hnrnph2 |            |                              |         |
| <i>Hnrnph3</i>    |               | Hnrnph3 | Hnrnph3    |                              |         |
| <i>Hnrnpk</i>     |               |         | Hnrnpk     |                              |         |
| <i>Hnrnpl</i>     |               |         | Hnrnpl     |                              |         |
| <i>Hnrnp11</i>    |               | Hnrnp11 | Hnrnp11    |                              |         |
| <i>Hnrnpm</i>     |               |         | Hnrnpm     |                              |         |
| <i>Hnrnpr</i>     |               | Hnrnpr  |            |                              |         |
| <i>Hnrnpu</i>     |               |         | Hnrnpu     |                              |         |
| <i>Hoga1</i>      |               | Hoga1   | Hoga1      |                              |         |
| <i>Homer1</i>     |               | Homer1  | Homer1     |                              |         |
| <i>Hook2</i>      |               |         | Hook2      |                              |         |
| <i>Hook3</i>      |               |         | Hook3      |                              | Hook3   |
| <i>Hopx</i>       |               |         | Hopx       |                              | Hopx    |
| <i>Hormad1</i>    |               | Hormad1 | Hormad1    |                              |         |
| <i>Hormad2</i>    |               |         | Hormad2    |                              |         |
| <i>Hotair</i>     |               | Hotair  |            |                              |         |
| <i>Hoxa2</i>      | Hoxa2         | Hoxa2   |            |                              |         |

Suppl. Table 1  
(90/234)

|                 | CHIP-Seq hits |          |          | Unique hits with interactors |       |
|-----------------|---------------|----------|----------|------------------------------|-------|
|                 | unstimulated  | Ac       | LPS      | Ac                           | LPS   |
| <i>Hoxa7</i>    | Hoxa7         | Hoxa7    | Hoxa7    |                              |       |
| <i>Hoxa9</i>    | Hoxa9         |          |          |                              |       |
| <i>Hoxaas2</i>  | Hoxaas2       |          |          |                              |       |
| <i>Hoxb1</i>    |               | Hoxb1    |          | Hoxb1                        |       |
| <i>Hoxb2</i>    |               |          | Hoxb2    |                              |       |
| <i>Hoxb3</i>    |               | Hoxb3    |          | Hoxb3                        |       |
| <i>Hoxb4</i>    |               | Hoxb4    |          | Hoxb4                        |       |
| <i>Hoxb5</i>    |               |          | Hoxb5    |                              |       |
| <i>Hoxb6</i>    | Hoxb6         | Hoxb6    | Hoxb6    |                              |       |
| <i>Hoxb8</i>    |               |          | Hoxb8    |                              |       |
| <i>Hoxc11</i>   |               | Hoxc11   |          |                              |       |
| <i>Hoxc12</i>   |               | Hoxc12   | Hoxc12   |                              |       |
| <i>Hoxc13</i>   |               | Hoxc13   |          |                              |       |
| <i>Hoxc4</i>    |               |          | Hoxc4    |                              | Hoxc4 |
| <i>Hoxc5</i>    | Hoxc5         |          | Hoxc5    |                              |       |
| <i>Hoxc8</i>    |               |          | Hoxc8    |                              |       |
| <i>Hoxd1</i>    |               | Hoxd1    |          |                              |       |
| <i>Hoxd10</i>   |               | Hoxd10   |          |                              |       |
| <i>Hoxd12</i>   | Hoxd12        |          |          |                              |       |
| <i>Hoxd3os1</i> | Hoxd3os1      | Hoxd3os1 | Hoxd3os1 |                              |       |
| <i>Hoxd4</i>    |               |          | Hoxd4    |                              | Hoxd4 |
| <i>Hoxd9</i>    |               | Hoxd9    |          |                              |       |
| <i>Hpcal1</i>   |               |          | Hpcal1   |                              |       |
| <i>Hpcal4</i>   |               | Hpcal4   |          | Hpcal4                       |       |
| <i>Hpd</i>      |               |          | Hpd      |                              |       |
| <i>Hpgd</i>     | Hpgd          |          | Hpgd     |                              |       |
| <i>Hpgds</i>    | Hpgds         | Hpgds    | Hpgds    |                              |       |
| <i>Hps5</i>     |               | Hps5     |          |                              |       |
| <i>Hps6</i>     | Hps6          | Hps6     | Hps6     |                              |       |
| <i>Hpse</i>     |               | Hpse     |          |                              |       |
| <i>Hrasls5</i>  |               | Hrasls5  |          |                              |       |
| <i>Hrg</i>      |               | Hrg      |          |                              |       |
| <i>Hrh3</i>     | Hrh3          |          |          |                              |       |
| <i>Hrk</i>      | Hrk           | Hrk      | Hrk      |                              |       |
| <i>Hrsp12</i>   |               | Hrsp12   |          |                              |       |
| <i>Hs3st3b1</i> | Hs3st3b1      | Hs3st3b1 | Hs3st3b1 |                              |       |
| <i>Hs3st5</i>   |               |          | Hs3st5   |                              |       |
| <i>Hs3st6</i>   |               | Hs3st6   | Hs3st6   |                              |       |
| <i>Hscb</i>     | Hscb          | Hscb     | Hscb     |                              |       |
| <i>Hsd17b10</i> |               | Hsd17b10 |          |                              |       |
| <i>Hsd17b11</i> | Hsd17b11      | Hsd17b11 |          |                              |       |
| <i>Hsd17b14</i> |               | Hsd17b14 |          |                              |       |
| <i>Hsd17b2</i>  |               |          | Hsd17b2  |                              |       |
| <i>Hsd17b4</i>  |               |          | Hsd17b4  |                              |       |
| <i>Hsd17b6</i>  | Hsd17b6       | Hsd17b6  | Hsd17b6  |                              |       |
| <i>Hsd17b7</i>  |               | Hsd17b7  | Hsd17b7  |                              |       |
| <i>Hsd3b6</i>   | Hsd3b6        | Hsd3b6   | Hsd3b6   |                              |       |
| <i>Hsd3b7</i>   |               |          | Hsd3b7   |                              |       |
| <i>Hsf1</i>     |               | Hsf1     | Hsf1     |                              |       |

Suppl. Table 1  
(91/234)

|                      | CHIP-Seq hits |         |               | Unique hits with interactors |       |
|----------------------|---------------|---------|---------------|------------------------------|-------|
|                      | unstimulated  | Ac      | LPS           | Ac                           | LPS   |
| <i>Hsf3</i>          | Hsf3          |         |               |                              |       |
| <i>Hsf4</i>          |               |         | Hsf4          |                              |       |
| <i>Hsf5</i>          | Hsf5          | Hsf5    |               |                              |       |
| <i>Hsfy2</i>         |               |         | Hsfy2         |                              |       |
| <i>Hsh2d</i>         |               | Hsh2d   | Hsh2d         |                              |       |
| <i>Hsp90ab1</i>      |               |         | Hsp90ab1      |                              |       |
| <i>Hsp90b1</i>       | Hsp90b1       | Hsp90b1 | Hsp90b1       |                              |       |
| <i>Hspa12b</i>       |               | Hspa12b |               |                              |       |
| <i>Hspa14</i>        | Hspa14        |         | Hspa14        |                              |       |
| <i>Hspa1b</i>        | Hspa1b        | Hspa1b  | Hspa1b        |                              |       |
| <i>Hspa4</i>         |               | Hspa4   |               |                              |       |
| <i>Hspa5</i>         | Hspa5         | Hspa5   |               |                              |       |
| <i>Hspa8</i>         | Hspa8         |         | Hspa8         |                              |       |
| <i>Hspb1</i>         |               | Hspb1   | Hspb1         |                              |       |
| <i>Hspb2</i>         |               | Hspb2   |               |                              |       |
| <i>Hspb7</i>         |               | Hspb7   |               | Hspb7                        |       |
| <i>Hspb8</i>         |               | Hspb8   |               |                              |       |
| <i>Hspbap1</i>       |               |         | Hspbap1       |                              |       |
| <i>Hspbp1</i>        | Hspbp1        |         |               |                              |       |
| <i>Hspd1</i>         |               | Hspd1   |               |                              |       |
| <i>Hspe1</i>         |               | Hspe1   |               |                              |       |
| <i>Hsph1</i>         |               |         | Hsph1         |                              |       |
| <i>Htatsf1</i>       |               | Htatsf1 | Htatsf1       |                              |       |
| <i>Htr1f</i>         |               | Htr1f   |               | Htr1f                        |       |
| <i>Htr2b</i>         | Htr2b         |         |               |                              |       |
| <i>Htr3a</i>         |               | Htr3a   |               |                              |       |
| <i>Htr5a</i>         |               | Htr5a   |               | Htr5a                        |       |
| <i>Htra1</i>         | Htra1         | Htra1   | Htra1         |                              |       |
| <i>Htra2</i>         |               | Htra2   | Htra2         |                              |       |
| <i>Htra4</i>         | Htra4         |         |               |                              |       |
| <i>Huwe1</i>         |               | Huwe1   |               |                              |       |
| <i>Hvcn1</i>         |               | Hvcn1   |               |                              |       |
| <i>Hyal3</i>         | Hyal3         | Hyal3   | Hyal3         |                              |       |
| <i>Hyal4</i>         | Hyal4         |         | Hyal4         |                              |       |
| <i>Hyal5</i>         | Hyal5         | Hyal5   | Hyal5         |                              |       |
| <i>Hyal6</i>         |               | Hyal6   | Hyal6         |                              |       |
| <i>Hyi</i>           |               | Hyi     |               |                              |       |
| <i>Hykk</i>          |               | Hykk    |               |                              |       |
| <i>Hyls1</i>         |               | Hyls1   |               |                              |       |
| <i>I730030J21Rik</i> |               |         | I730030J21Rik |                              |       |
| <i>Iars</i>          |               |         | Iars          |                              | Iars  |
| <i>Iba57</i>         |               |         | Iba57         |                              | Iba57 |
| <i>Ibtk</i>          | Ibtk          | Ibtk    |               |                              |       |
| <i>Ica1</i>          |               | Ica1    |               |                              |       |
| <i>Ica1l</i>         | Ica1l         |         |               |                              |       |
| <i>Icam1</i>         |               |         | Icam1         |                              |       |
| <i>Icam2</i>         |               |         | Icam2         |                              |       |
| <i>Icam4</i>         |               |         | Icam4         |                              |       |
| <i>Icam5</i>         |               | Icam5   | Icam5         |                              |       |

Suppl. Table 1  
(92/234)

|                 | ChIP-Seq hits |          |          | Unique hits with interactors |        |
|-----------------|---------------|----------|----------|------------------------------|--------|
|                 | unstimulated  | Ac       | LPS      | Ac                           | LPS    |
| <i>Icosl</i>    |               | Icosl    | Icosl    |                              |        |
| <i>Id1</i>      |               |          | Id1      |                              | Id1    |
| <i>Id3</i>      |               | Id3      |          | Id3                          |        |
| <i>Idh1</i>     |               |          | Idh1     |                              |        |
| <i>Idh3a</i>    |               |          | Idh3a    |                              |        |
| <i>Idh3b</i>    |               |          | Idh3b    |                              |        |
| <i>Idi1</i>     | Idi1          | Idi1     |          |                              |        |
| <i>Idnk</i>     |               |          | Idnk     |                              | Idnk   |
| <i>Ido2</i>     |               | Ido2     | Ido2     |                              |        |
| <i>Idua</i>     | Idua          |          | Idua     |                              |        |
| <i>Ier2</i>     |               | Ier2     |          |                              |        |
| <i>Ier3ip1</i>  |               | Ier3ip1  |          |                              |        |
| <i>Ier5</i>     |               |          | Ier5     |                              |        |
| <i>Ier5l</i>    |               |          | Ier5l    |                              |        |
| <i>Ifi204</i>   |               | Ifi204   |          | Ifi204                       |        |
| <i>Ifi205</i>   |               | Ifi205   | Ifi205   |                              |        |
| <i>Ifi27l2b</i> |               | Ifi27l2b | Ifi27l2b |                              |        |
| <i>Ifi44l</i>   | Ifi44l        |          |          |                              |        |
| <i>Ifih1</i>    | Ifih1         | Ifih1    | Ifih1    |                              |        |
| <i>Ifit1bl1</i> | Ifit1bl1      | Ifit1bl1 | Ifit1bl1 |                              |        |
| <i>Ifit3b</i>   | Ifit3b        | Ifit3b   | Ifit3b   |                              |        |
| <i>Ifitm1</i>   |               | Ifitm1   | Ifitm1   |                              |        |
| <i>Ifitm3</i>   |               | Ifitm3   |          |                              |        |
| <i>Ifitm6</i>   | Ifitm6        |          |          |                              |        |
| <i>Ifitm7</i>   |               |          | Ifitm7   |                              |        |
| <i>Ifna11</i>   |               |          | Ifna11   |                              | Ifna11 |
| <i>Ifna12</i>   |               |          | Ifna12   |                              |        |
| <i>Ifna13</i>   |               | Ifna13   | Ifna13   |                              |        |
| <i>Ifna14</i>   | Ifna14        |          |          |                              |        |
| <i>Ifna15</i>   |               | Ifna15   | Ifna15   |                              |        |
| <i>Ifna4</i>    |               |          | Ifna4    |                              |        |
| <i>Ifna5</i>    | Ifna5         | Ifna5    | Ifna5    |                              |        |
| <i>Ifna7</i>    |               |          | Ifna7    |                              |        |
| <i>Ifna9</i>    | Ifna9         |          |          |                              |        |
| <i>Ifnab</i>    |               | Ifnab    |          |                              |        |
| <i>Ifnar1</i>   | Ifnar1        |          |          |                              |        |
| <i>Ifnar2</i>   |               | Ifnar2   |          |                              |        |
| <i>Ifnb1</i>    |               | Ifnb1    |          |                              |        |
| <i>Ifne</i>     |               |          | Ifne     |                              |        |
| <i>Ifng</i>     |               | Ifng     |          | Ifng                         |        |
| <i>Ifnl2</i>    |               | Ifnl2    | Ifnl2    |                              |        |
| <i>Ifnl3</i>    |               |          | Ifnl3    |                              |        |
| <i>Ifnlr1</i>   |               |          | Ifnlr1   |                              |        |
| <i>Ifnz</i>     |               |          | Ifnz     |                              |        |
| <i>Ifrd2</i>    |               | Ifrd2    |          |                              |        |
| <i>Ift22</i>    | Ift22         | Ift22    | Ift22    |                              |        |
| <i>Ift27</i>    | Ift27         |          |          |                              |        |
| <i>Ift46</i>    | Ift46         | Ift46    | Ift46    |                              |        |
| <i>Ift52</i>    | Ift52         | Ift52    | Ift52    |                              |        |

Suppl. Table 1  
(93/234)

|                | ChIP-Seq hits  |                |                | Unique hits with interactors |               |
|----------------|----------------|----------------|----------------|------------------------------|---------------|
|                | unstimulated   | Ac             | LPS            | Ac                           | LPS           |
| <i>lft57</i>   |                |                | <i>lft57</i>   |                              |               |
| <i>lft74</i>   |                | <i>lft74</i>   |                |                              |               |
| <i>lft80</i>   |                | <i>lft80</i>   |                |                              |               |
| <i>lft81</i>   | <i>lft81</i>   |                |                |                              |               |
| <i>lft88</i>   | <i>lft88</i>   |                |                |                              |               |
| <i>lgf1r</i>   | <i>lgf1r</i>   | <i>lgf1r</i>   | <i>lgf1r</i>   |                              |               |
| <i>lgf2bp1</i> |                |                | <i>lgf2bp1</i> |                              |               |
| <i>lgf2bp2</i> | <i>lgf2bp2</i> | <i>lgf2bp2</i> |                |                              |               |
| <i>lgf2bp3</i> |                | <i>lgf2bp3</i> | <i>lgf2bp3</i> |                              |               |
| <i>lgf2os</i>  |                | <i>lgf2os</i>  |                |                              |               |
| <i>lgf2r</i>   | <i>lgf2r</i>   |                | <i>lgf2r</i>   |                              |               |
| <i>lgfbp3</i>  |                |                | <i>lgfbp3</i>  |                              | <i>lgfbp3</i> |
| <i>lgfbp6</i>  |                |                | <i>lgfbp6</i>  |                              |               |
| <i>lgfl3</i>   |                |                | <i>lgfl3</i>   |                              |               |
| <i>lgflr1</i>  | <i>lgflr1</i>  | <i>lgflr1</i>  | <i>lgflr1</i>  |                              |               |
| <i>lghmbp2</i> | <i>lghmbp2</i> | <i>lghmbp2</i> |                |                              |               |
| <i>lgip</i>    |                |                | <i>lgip</i>    |                              |               |
| <i>lglon5</i>  |                |                | <i>lglon5</i>  |                              | <i>lglon5</i> |
| <i>lgsf10</i>  |                | <i>lgsf10</i>  | <i>lgsf10</i>  |                              |               |
| <i>lgsf11</i>  |                |                | <i>lgsf11</i>  |                              |               |
| <i>lgsf23</i>  | <i>lgsf23</i>  | <i>lgsf23</i>  |                |                              |               |
| <i>lgsf5</i>   |                |                | <i>lgsf5</i>   |                              |               |
| <i>lgsf6</i>   |                |                | <i>lgsf6</i>   |                              |               |
| <i>lgsf8</i>   | <i>lgsf8</i>   |                | <i>lgsf8</i>   |                              |               |
| <i>lgsf9</i>   |                |                | <i>lgsf9</i>   |                              | <i>lgsf9</i>  |
| <i>lgtp</i>    |                | <i>lgtp</i>    | <i>lgtp</i>    |                              |               |
| <i>lk</i>      |                |                | <i>lk</i>      |                              |               |
| <i>lkbip</i>   | <i>lkbip</i>   |                | <i>lkbip</i>   |                              |               |
| <i>lkbke</i>   |                | <i>lkbke</i>   | <i>lkbke</i>   |                              |               |
| <i>lkbkg</i>   | <i>lkbkg</i>   |                | <i>lkbkg</i>   |                              |               |
| <i>lkzf2</i>   | <i>lkzf2</i>   |                | <i>lkzf2</i>   |                              |               |
| <i>lkzf5</i>   |                |                | <i>lkzf5</i>   |                              | <i>lkzf5</i>  |
| <i>ll10rb</i>  |                |                | <i>ll10rb</i>  |                              | <i>ll10rb</i> |
| <i>ll12a</i>   |                | <i>ll12a</i>   |                |                              |               |
| <i>ll12b</i>   |                |                | <i>ll12b</i>   |                              | <i>ll12b</i>  |
| <i>ll12rb1</i> |                |                | <i>ll12rb1</i> |                              |               |
| <i>ll13</i>    | <i>ll13</i>    | <i>ll13</i>    | <i>ll13</i>    |                              |               |
| <i>ll15</i>    |                | <i>ll15</i>    |                |                              |               |
| <i>ll15ra</i>  |                |                | <i>ll15ra</i>  |                              | <i>ll15ra</i> |
| <i>ll16</i>    | <i>ll16</i>    |                |                |                              |               |
| <i>ll17a</i>   |                |                | <i>ll17a</i>   |                              | <i>ll17a</i>  |
| <i>ll17c</i>   |                |                | <i>ll17c</i>   |                              |               |
| <i>ll17d</i>   |                | <i>ll17d</i>   |                |                              |               |
| <i>ll17f</i>   | <i>ll17f</i>   |                |                |                              |               |
| <i>ll17ra</i>  |                |                | <i>ll17ra</i>  |                              | <i>ll17ra</i> |
| <i>ll17rb</i>  |                |                | <i>ll17rb</i>  |                              |               |
| <i>ll17rc</i>  | <i>ll17rc</i>  | <i>ll17rc</i>  | <i>ll17rc</i>  |                              |               |
| <i>ll17rd</i>  |                | <i>ll17rd</i>  |                |                              |               |
| <i>ll18bp</i>  |                | <i>ll18bp</i>  |                | <i>ll18bp</i>                |               |

Suppl. Table 1  
(94/234)

|                 | ChIP-Seq hits   |                 |                 | Unique hits with interactors |             |
|-----------------|-----------------|-----------------|-----------------|------------------------------|-------------|
|                 | unstimulated    | Ac              | LPS             | Ac                           | LPS         |
| <i>Il19</i>     |                 | <i>Il19</i>     |                 |                              |             |
| <i>Il1f10</i>   |                 | <i>Il1f10</i>   |                 |                              |             |
| <i>Il1f5</i>    |                 |                 | <i>Il1f5</i>    |                              |             |
| <i>Il1f9</i>    |                 | <i>Il1f9</i>    |                 |                              |             |
| <i>Il1r1</i>    | <i>Il1r1</i>    |                 |                 |                              |             |
| <i>Il1r2</i>    |                 | <i>Il1r2</i>    |                 |                              |             |
| <i>Il1rapl1</i> |                 | <i>Il1rapl1</i> |                 |                              |             |
| <i>Il1rapl2</i> | <i>Il1rapl2</i> |                 | <i>Il1rapl2</i> |                              |             |
| <i>Il1rl1</i>   |                 | <i>Il1rl1</i>   |                 | <i>Il1rl1</i>                |             |
| <i>Il2</i>      | <i>Il2</i>      |                 |                 |                              |             |
| <i>Il20ra</i>   |                 |                 | <i>Il20ra</i>   |                              |             |
| <i>Il22ra1</i>  |                 | <i>Il22ra1</i>  |                 |                              |             |
| <i>Il22ra2</i>  |                 | <i>Il22ra2</i>  |                 |                              |             |
| <i>Il23a</i>    | <i>Il23a</i>    | <i>Il23a</i>    | <i>Il23a</i>    |                              |             |
| <i>Il23r</i>    | <i>Il23r</i>    |                 | <i>Il23r</i>    |                              |             |
| <i>Il24</i>     |                 | <i>Il24</i>     |                 |                              |             |
| <i>Il27</i>     |                 | <i>Il27</i>     |                 | <i>Il27</i>                  |             |
| <i>Il2rb</i>    |                 | <i>Il2rb</i>    |                 |                              |             |
| <i>Il2rg</i>    |                 | <i>Il2rg</i>    |                 |                              |             |
| <i>Il33</i>     | <i>Il33</i>     |                 |                 |                              |             |
| <i>Il4</i>      | <i>Il4</i>      |                 | <i>Il4</i>      |                              |             |
| <i>Il4i1</i>    | <i>Il4i1</i>    | <i>Il4i1</i>    | <i>Il4i1</i>    |                              |             |
| <i>Il5</i>      |                 | <i>Il5</i>      |                 | <i>Il5</i>                   |             |
| <i>Il6ra</i>    | <i>Il6ra</i>    | <i>Il6ra</i>    | <i>Il6ra</i>    |                              |             |
| <i>Il6st</i>    |                 | <i>Il6st</i>    | <i>Il6st</i>    |                              |             |
| <i>Il7</i>      |                 |                 | <i>Il7</i>      |                              | <i>Il7</i>  |
| <i>Il7r</i>     |                 |                 | <i>Il7r</i>     |                              | <i>Il7r</i> |
| <i>Il9</i>      |                 | <i>Il9</i>      |                 |                              |             |
| <i>Ilf2</i>     | <i>Ilf2</i>     |                 | <i>Ilf2</i>     |                              |             |
| <i>Ilf3</i>     |                 | <i>Ilf3</i>     |                 |                              |             |
| <i>Ilkap</i>    |                 | <i>Ilkap</i>    | <i>Ilkap</i>    |                              |             |
| <i>Iltifb</i>   | <i>Iltifb</i>   | <i>Iltifb</i>   |                 |                              |             |
| <i>Immp2l</i>   |                 |                 | <i>Immp2l</i>   |                              |             |
| <i>Immt</i>     |                 |                 | <i>Immt</i>     |                              |             |
| <i>Imp4</i>     |                 |                 | <i>Imp4</i>     |                              |             |
| <i>Impa1</i>    |                 | <i>Impa1</i>    | <i>Impa1</i>    |                              |             |
| <i>Impa2</i>    |                 |                 | <i>Impa2</i>    |                              |             |
| <i>Impact</i>   | <i>Impact</i>   | <i>Impact</i>   | <i>Impact</i>   |                              |             |
| <i>Impdh1</i>   |                 | <i>Impdh1</i>   | <i>Impdh1</i>   |                              |             |
| <i>Impdh2</i>   |                 | <i>Impdh2</i>   |                 |                              |             |
| <i>Impg1</i>    |                 | <i>Impg1</i>    |                 |                              |             |
| <i>Ina</i>      |                 |                 | <i>Ina</i>      |                              | <i>Ina</i>  |
| <i>Inafm2</i>   |                 | <i>Inafm2</i>   |                 |                              |             |
| <i>Inca1</i>    |                 | <i>Inca1</i>    |                 |                              |             |
| <i>Ing1</i>     |                 | <i>Ing1</i>     |                 |                              |             |
| <i>Ing2</i>     |                 | <i>Ing2</i>     |                 |                              |             |
| <i>Ing3</i>     |                 |                 | <i>Ing3</i>     |                              | <i>Ing3</i> |
| <i>Ing5</i>     | <i>Ing5</i>     | <i>Ing5</i>     | <i>Ing5</i>     |                              |             |
| <i>Inhba</i>    |                 | <i>Inhba</i>    |                 |                              |             |

Suppl. Table 1  
(95/234)

|                 | CHIP-Seq hits   |               |                | Unique hits with interactors |              |
|-----------------|-----------------|---------------|----------------|------------------------------|--------------|
|                 | unstimulated    | Ac            | LPS            | Ac                           | LPS          |
| <i>Inhbc</i>    |                 | <i>Inhbc</i>  |                |                              |              |
| <i>Inip</i>     | <i>Inip</i>     |               |                |                              |              |
| <i>Inmt</i>     | <i>Inmt</i>     | <i>Inmt</i>   |                |                              |              |
| <i>Ino80</i>    |                 |               | <i>Ino80</i>   |                              |              |
| <i>Ino80b</i>   |                 | <i>Ino80b</i> |                |                              |              |
| <i>Ino80e</i>   | <i>Ino80e</i>   | <i>Ino80e</i> | <i>Ino80e</i>  |                              |              |
| <i>Inpp4a</i>   | <i>Inpp4a</i>   |               | <i>Inpp4a</i>  |                              |              |
| <i>Inpp4b</i>   | <i>Inpp4b</i>   |               |                |                              |              |
| <i>Inpp5a</i>   |                 | <i>Inpp5a</i> |                |                              |              |
| <i>Inpp5b</i>   |                 |               | <i>Inpp5b</i>  |                              |              |
| <i>Inpp5k</i>   |                 |               | <i>Inpp5k</i>  |                              |              |
| <i>Insig2</i>   | <i>Insig2</i>   | <i>Insig2</i> | <i>Insig2</i>  |                              |              |
| <i>Insl5</i>    |                 | <i>Insl5</i>  |                |                              |              |
| <i>Insr</i>     | <i>Insr</i>     |               |                |                              |              |
| <i>Ints12</i>   | <i>Ints12</i>   |               |                |                              |              |
| <i>Ints3</i>    |                 |               | <i>Ints3</i>   |                              |              |
| <i>Ints5</i>    |                 |               | <i>Ints5</i>   |                              |              |
| <i>Ints6</i>    | <i>Ints6</i>    |               | <i>Ints6</i>   |                              |              |
| <i>Ints7</i>    | <i>Ints7</i>    | <i>Ints7</i>  |                |                              |              |
| <i>Ints8</i>    | <i>Ints8</i>    | <i>Ints8</i>  |                |                              |              |
| <i>Ints9</i>    | <i>Ints9</i>    |               |                |                              |              |
| <i>Intu</i>     |                 | <i>Intu</i>   |                | <i>Intu</i>                  |              |
| <i>Invs</i>     | <i>Invs</i>     | <i>Invs</i>   |                |                              |              |
| <i>Ip6k1</i>    | <i>Ip6k1</i>    | <i>Ip6k1</i>  | <i>Ip6k1</i>   |                              |              |
| <i>Ip6k3</i>    |                 | <i>Ip6k3</i>  |                |                              |              |
| <i>Ipmk</i>     | <i>Ipmk</i>     | <i>Ipmk</i>   |                |                              |              |
| <i>Ipo5</i>     |                 |               | <i>Ipo5</i>    |                              |              |
| <i>Ipo7</i>     | <i>Ipo7</i>     |               | <i>Ipo7</i>    |                              |              |
| <i>Ipp</i>      |                 |               | <i>Ipp</i>     |                              |              |
| <i>Ippk</i>     |                 | <i>Ippk</i>   |                |                              |              |
| <i>Iqca</i>     | <i>Iqca</i>     |               |                |                              |              |
| <i>Iqce</i>     |                 | <i>Iqce</i>   | <i>Iqce</i>    |                              |              |
| <i>Iqcf5</i>    | <i>Iqcf5</i>    | <i>Iqcf5</i>  |                |                              |              |
| <i>Iqcf6</i>    |                 | <i>Iqcf6</i>  |                |                              |              |
| <i>Iqcg</i>     | <i>Iqcg</i>     | <i>Iqcg</i>   | <i>Iqcg</i>    |                              |              |
| <i>Iqch</i>     | <i>Iqch</i>     |               |                |                              |              |
| <i>Iqck</i>     |                 | <i>Iqck</i>   |                |                              |              |
| <i>Iqgap1</i>   |                 | <i>Iqgap1</i> | <i>Iqgap1</i>  |                              |              |
| <i>Iqgap3</i>   | <i>Iqgap3</i>   |               |                |                              |              |
| <i>Iqsec3</i>   | <i>Iqsec3</i>   | <i>Iqsec3</i> | <i>Iqsec3</i>  |                              |              |
| <i>Irak1</i>    | <i>Irak1</i>    | <i>Irak1</i>  |                |                              |              |
| <i>Irak1bp1</i> | <i>Irak1bp1</i> |               |                |                              |              |
| <i>Irak2</i>    |                 |               | <i>Irak2</i>   |                              | <i>Irak2</i> |
| <i>Irak4</i>    |                 | <i>Irak4</i>  |                |                              |              |
| <i>Irf2</i>     |                 |               | <i>Irf2</i>    |                              | <i>Irf2</i>  |
| <i>Irf2bp1</i>  |                 |               | <i>Irf2bp1</i> |                              |              |
| <i>Irf2bp2</i>  |                 |               | <i>Irf2bp2</i> |                              |              |
| <i>Irf3</i>     | <i>Irf3</i>     | <i>Irf3</i>   | <i>Irf3</i>    |                              |              |
| <i>Irf5</i>     |                 | <i>Irf5</i>   |                |                              |              |

Suppl. Table 1  
(96/234)

|                 | CHIP-Seq hits   |                |                | Unique hits with interactors |                |
|-----------------|-----------------|----------------|----------------|------------------------------|----------------|
|                 | unstimulated    | Ac             | LPS            | Ac                           | LPS            |
| <i>Irf7</i>     |                 |                | <i>Irf7</i>    |                              | <i>Irf7</i>    |
| <i>Irgc1</i>    |                 |                | <i>Irgc1</i>   |                              |                |
| <i>Irs3</i>     | <i>Irs3</i>     |                |                |                              |                |
| <i>Isca2</i>    |                 |                | <i>Isca2</i>   |                              |                |
| <i>Iscu</i>     |                 | <i>Iscu</i>    | <i>Iscu</i>    |                              |                |
| <i>Isg15</i>    | <i>Isg15</i>    |                | <i>Isg15</i>   |                              |                |
| <i>Isg20</i>    |                 | <i>Isg20</i>   |                |                              |                |
| <i>Isg20l2</i>  |                 |                | <i>Isg20l2</i> |                              | <i>Isg20l2</i> |
| <i>Isl1</i>     |                 | <i>Isl1</i>    |                | <i>Isl1</i>                  |                |
| <i>Isl2</i>     |                 |                | <i>Isl2</i>    |                              |                |
| <i>Islr</i>     | <i>Islr</i>     |                |                |                              |                |
| <i>Islr2</i>    |                 | <i>Islr2</i>   |                |                              |                |
| <i>Isoc2a</i>   | <i>Isoc2a</i>   |                |                |                              |                |
| <i>Isoc2b</i>   |                 |                | <i>Isoc2b</i>  |                              |                |
| <i>Ispd</i>     | <i>Ispd</i>     | <i>Ispd</i>    |                |                              |                |
| <i>Israa</i>    |                 | <i>Israa</i>   |                |                              |                |
| <i>Ist1</i>     |                 | <i>Ist1</i>    |                | <i>Ist1</i>                  |                |
| <i>Isx</i>      |                 | <i>Isx</i>     | <i>Isx</i>     |                              |                |
| <i>Isyna1</i>   |                 |                | <i>Isyna1</i>  |                              |                |
| <i>Itch</i>     | <i>Itch</i>     |                | <i>Itch</i>    |                              |                |
| <i>Itfg1</i>    |                 |                | <i>Itfg1</i>   |                              | <i>Itfg1</i>   |
| <i>Itfg2</i>    |                 |                | <i>Itfg2</i>   |                              |                |
| <i>Itfg3</i>    |                 |                | <i>Itfg3</i>   |                              |                |
| <i>Itga2b</i>   |                 | <i>Itga2b</i>  | <i>Itga2b</i>  |                              |                |
| <i>Itga3</i>    |                 | <i>Itga3</i>   | <i>Itga3</i>   |                              |                |
| <i>Itga4</i>    |                 |                | <i>Itga4</i>   |                              | <i>Itga4</i>   |
| <i>Itga6</i>    |                 | <i>Itga6</i>   |                |                              |                |
| <i>Itga8</i>    |                 | <i>Itga8</i>   |                |                              |                |
| <i>Itgad</i>    |                 | <i>Itgad</i>   | <i>Itgad</i>   |                              |                |
| <i>Itgal</i>    |                 |                | <i>Itgal</i>   |                              |                |
| <i>Itgb1</i>    | <i>Itgb1</i>    |                | <i>Itgb1</i>   |                              |                |
| <i>Itgb1bp1</i> | <i>Itgb1bp1</i> |                |                |                              |                |
| <i>Itgb2l</i>   |                 | <i>Itgb2l</i>  | <i>Itgb2l</i>  |                              |                |
| <i>Itgb3</i>    |                 |                | <i>Itgb3</i>   |                              | <i>Itgb3</i>   |
| <i>Itgb3bp</i>  |                 | <i>Itgb3bp</i> |                |                              |                |
| <i>Itgb5</i>    | <i>Itgb5</i>    | <i>Itgb5</i>   | <i>Itgb5</i>   |                              |                |
| <i>Itgb7</i>    |                 | <i>Itgb7</i>   |                |                              |                |
| <i>Itih1</i>    |                 | <i>Itih1</i>   |                |                              |                |
| <i>Itih2</i>    | <i>Itih2</i>    | <i>Itih2</i>   | <i>Itih2</i>   |                              |                |
| <i>Itih3</i>    |                 | <i>Itih3</i>   |                |                              |                |
| <i>Itih4</i>    |                 | <i>Itih4</i>   | <i>Itih4</i>   |                              |                |
| <i>Itih5</i>    | <i>Itih5</i>    |                |                |                              |                |
| <i>Itk</i>      |                 |                | <i>Itk</i>     |                              |                |
| <i>Itln1</i>    | <i>Itln1</i>    | <i>Itln1</i>   |                |                              |                |
| <i>Itm2b</i>    | <i>Itm2b</i>    | <i>Itm2b</i>   | <i>Itm2b</i>   |                              |                |
| <i>Itm2c</i>    |                 | <i>Itm2c</i>   |                |                              |                |
| <i>Itpa</i>     |                 | <i>Itpa</i>    | <i>Itpa</i>    |                              |                |
| <i>Itpka</i>    |                 | <i>Itpka</i>   |                |                              |                |
| <i>Itpkb</i>    | <i>Itpkb</i>    | <i>Itpkb</i>   | <i>Itpkb</i>   |                              |                |



Suppl. Table 1  
(97/234)

|                 | ChIP-Seq hits   |                 |                | Unique hits with interactors |               |
|-----------------|-----------------|-----------------|----------------|------------------------------|---------------|
|                 | unstimulated    | Ac              | LPS            | Ac                           | LPS           |
| <i>Itpr3</i>    |                 | <i>Itpr3</i>    |                |                              |               |
| <i>Itpripl2</i> |                 | <i>Itpripl2</i> |                | <i>Itpripl2</i>              |               |
| <i>Itsn1</i>    |                 | <i>Itsn1</i>    |                | <i>Itsn1</i>                 |               |
| <i>Itsn2</i>    | <i>Itsn2</i>    |                 |                |                              |               |
| <i>Ivd</i>      |                 | <i>Ivd</i>      |                |                              |               |
| <i>Ivl</i>      | <i>Ivl</i>      |                 |                |                              |               |
| <i>Ivns1abp</i> | <i>Ivns1abp</i> | <i>Ivns1abp</i> |                |                              |               |
| <i>Iws1</i>     |                 |                 | <i>Iws1</i>    |                              | <i>Iws1</i>   |
| <i>Iyd</i>      | <i>Iyd</i>      |                 | <i>Iyd</i>     |                              |               |
| <i>Izumo1</i>   | <i>Izumo1</i>   |                 |                |                              |               |
| <i>Izumo1r</i>  |                 | <i>Izumo1r</i>  |                |                              |               |
| <i>Izumo2</i>   |                 |                 | <i>Izumo2</i>  |                              |               |
| <i>Jade2</i>    | <i>Jade2</i>    |                 |                |                              |               |
| <i>Jag1</i>     | <i>Jag1</i>     |                 | <i>Jag1</i>    |                              |               |
| <i>Jag2</i>     |                 | <i>Jag2</i>     |                | <i>Jag2</i>                  |               |
| <i>Jagn1</i>    |                 | <i>Jagn1</i>    | <i>Jagn1</i>   |                              |               |
| <i>Jak1</i>     |                 |                 | <i>Jak1</i>    |                              | <i>Jak1</i>   |
| <i>Jak2</i>     |                 |                 | <i>Jak2</i>    |                              | <i>Jak2</i>   |
| <i>Jakmip1</i>  |                 | <i>Jakmip1</i>  |                |                              |               |
| <i>Jam2</i>     |                 |                 | <i>Jam2</i>    |                              | <i>Jam2</i>   |
| <i>Jam3</i>     |                 |                 | <i>Jam3</i>    |                              |               |
| <i>Jarid2</i>   |                 |                 | <i>Jarid2</i>  |                              |               |
| <i>Jazf1</i>    |                 | <i>Jazf1</i>    | <i>Jazf1</i>   |                              |               |
| <i>Jmjd1c</i>   |                 |                 | <i>Jmjd1c</i>  |                              |               |
| <i>Jmjd4</i>    | <i>Jmjd4</i>    |                 | <i>Jmjd4</i>   |                              |               |
| <i>Jph3</i>     | <i>Jph3</i>     | <i>Jph3</i>     | <i>Jph3</i>    |                              |               |
| <i>Jph4</i>     | <i>Jph4</i>     |                 | <i>Jph4</i>    |                              |               |
| <i>Jpx</i>      |                 | <i>Jpx</i>      |                |                              |               |
| <i>Jsrp1</i>    |                 |                 | <i>Jsrp1</i>   |                              |               |
| <i>Jtb</i>      | <i>Jtb</i>      | <i>Jtb</i>      | <i>Jtb</i>     |                              |               |
| <i>Jun</i>      |                 |                 | <i>Jun</i>     |                              | <i>Jun</i>    |
| <i>Junb</i>     | <i>Junb</i>     | <i>Junb</i>     | <i>Junb</i>    |                              |               |
| <i>Kank2</i>    | <i>Kank2</i>    | <i>Kank2</i>    |                |                              |               |
| <i>Kank3</i>    |                 |                 | <i>Kank3</i>   |                              |               |
| <i>Kank4</i>    |                 |                 | <i>Kank4</i>   |                              |               |
| <i>Kansl1</i>   |                 | <i>Kansl1</i>   |                |                              |               |
| <i>Kansl2</i>   |                 |                 | <i>Kansl2</i>  |                              | <i>Kansl2</i> |
| <i>Kansl3</i>   | <i>Kansl3</i>   |                 |                |                              |               |
| <i>Kars</i>     | <i>Kars</i>     |                 | <i>Kars</i>    |                              |               |
| <i>Kat2b</i>    |                 | <i>Kat2b</i>    | <i>Kat2b</i>   |                              |               |
| <i>Kat5</i>     | <i>Kat5</i>     |                 | <i>Kat5</i>    |                              |               |
| <i>Kat6a</i>    |                 | <i>Kat6a</i>    | <i>Kat6a</i>   |                              |               |
| <i>Kat6b</i>    |                 |                 | <i>Kat6b</i>   |                              |               |
| <i>Kat7</i>     | <i>Kat7</i>     |                 |                |                              |               |
| <i>Kat8</i>     |                 |                 | <i>Kat8</i>    |                              |               |
| <i>Katna1</i>   |                 | <i>Katna1</i>   |                |                              |               |
| <i>Katnal1</i>  | <i>Katnal1</i>  |                 |                |                              |               |
| <i>Katnal2</i>  |                 |                 | <i>Katnal2</i> |                              |               |
| <i>Katnbl1</i>  |                 | <i>Katnbl1</i>  |                |                              |               |

Suppl. Table 1  
(98/234)

|                 | CHIP-Seq hits |        |         | Unique hits with interactors |        |
|-----------------|---------------|--------|---------|------------------------------|--------|
|                 | unstimulated  | Ac     | LPS     | Ac                           | LPS    |
| <i>Kazald1</i>  | Kazald1       |        | Kazald1 |                              |        |
| <i>Kazn</i>     |               |        | Kazn    |                              |        |
| <i>Kbtbd2</i>   |               | Kbtbd2 |         | Kbtbd2                       |        |
| <i>Kbtbd3</i>   | Kbtbd3        | Kbtbd3 | Kbtbd3  |                              |        |
| <i>Kbtbd4</i>   |               |        | Kbtbd4  |                              |        |
| <i>Kbtbd6</i>   |               |        | Kbtbd6  |                              |        |
| <i>Kbtbd7</i>   |               |        | Kbtbd7  |                              |        |
| <i>Kbtbd8</i>   | Kbtbd8        |        |         |                              |        |
| <i>Kcmf1</i>    | Kcmf1         |        |         |                              |        |
| <i>Kcna10</i>   |               | Kcna10 |         |                              |        |
| <i>Kcna3</i>    | Kcna3         | Kcna3  |         |                              |        |
| <i>Kcna5</i>    |               |        | Kcna5   |                              |        |
| <i>Kcna6</i>    |               | Kcna6  |         |                              |        |
| <i>Kcna7</i>    | Kcna7         |        | Kcna7   |                              |        |
| <i>Kcnab1</i>   |               |        | Kcnab1  |                              | Kcnab1 |
| <i>Kcnab2</i>   | Kcnab2        |        |         |                              |        |
| <i>Kcnb1</i>    |               | Kcnb1  |         |                              |        |
| <i>Kcnc1</i>    |               | Kcnc1  |         | Kcnc1                        |        |
| <i>Kcnc2</i>    |               | Kcnc2  | Kcnc2   |                              |        |
| <i>Kcnc3</i>    |               | Kcnc3  |         | Kcnc3                        |        |
| <i>Kcne1</i>    |               |        | Kcne1   |                              |        |
| <i>Kcne2</i>    | Kcne2         | Kcne2  |         |                              |        |
| <i>Kcne3</i>    | Kcne3         |        |         |                              |        |
| <i>Kcng2</i>    |               | Kcng2  |         |                              |        |
| <i>Kcng3</i>    |               | Kcng3  |         |                              |        |
| <i>Kcnh2</i>    |               |        | Kcnh2   |                              |        |
| <i>Kcnh3</i>    |               | Kcnh3  | Kcnh3   |                              |        |
| <i>Kcnh5</i>    |               |        | Kcnh5   |                              |        |
| <i>Kcnh6</i>    |               |        | Kcnh6   |                              |        |
| <i>Kcnh7</i>    | Kcnh7         |        |         |                              |        |
| <i>Kcnip1</i>   |               | Kcnip1 |         |                              |        |
| <i>Kcnip3</i>   | Kcnip3        |        | Kcnip3  |                              |        |
| <i>Kcnip4</i>   |               | Kcnip4 | Kcnip4  |                              |        |
| <i>Kcnj13</i>   |               | Kcnj13 |         |                              |        |
| <i>Kcnj15</i>   | Kcnj15        |        | Kcnj15  |                              |        |
| <i>Kcnj16</i>   |               | Kcnj16 |         |                              |        |
| <i>Kcnj4</i>    | Kcnj4         |        |         |                              |        |
| <i>Kcnj6</i>    |               | Kcnj6  |         |                              |        |
| <i>Kcnk1</i>    |               | Kcnk1  |         |                              |        |
| <i>Kcnk4</i>    |               |        | Kcnk4   |                              |        |
| <i>Kcnk5</i>    |               | Kcnk5  | Kcnk5   |                              |        |
| <i>Kcnk6</i>    | Kcnk6         |        | Kcnk6   |                              |        |
| <i>Kcnmb1</i>   |               |        | Kcnmb1  |                              |        |
| <i>Kcnn3</i>    |               | Kcnn3  |         |                              |        |
| <i>Kcnn4</i>    | Kcnn4         | Kcnn4  | Kcnn4   |                              |        |
| <i>Kcnq1ot1</i> | Kcnq1ot1      |        |         |                              |        |
| <i>Kcnrg</i>    | Kcnrg         | Kcnrg  | Kcnrg   |                              |        |
| <i>Kcns1</i>    | Kcns1         |        |         |                              |        |
| <i>Kcns3</i>    |               |        | Kcns3   |                              |        |

Suppl. Table 1  
(99/234)

|                  | CHIP-Seq hits |                  |                  | Unique hits with interactors |               |
|------------------|---------------|------------------|------------------|------------------------------|---------------|
|                  | unstimulated  | Ac               | LPS              | Ac                           | LPS           |
| <i>Kcnt1</i>     |               |                  | <i>Kcnt1</i>     |                              |               |
| <i>Kcnt2</i>     |               | <i>Kcnt2</i>     | <i>Kcnt2</i>     |                              |               |
| <i>Kcnv1</i>     | <i>Kcnv1</i>  | <i>Kcnv1</i>     |                  |                              |               |
| <i>Kcp</i>       |               |                  | <i>Kcp</i>       |                              |               |
| <i>Kctd1</i>     |               | <i>Kctd1</i>     | <i>Kctd1</i>     |                              |               |
| <i>Kctd11</i>    |               | <i>Kctd11</i>    |                  | <i>Kctd11</i>                |               |
| <i>Kctd12</i>    | <i>Kctd12</i> |                  |                  |                              |               |
| <i>Kctd13</i>    |               |                  | <i>Kctd13</i>    |                              |               |
| <i>Kctd14</i>    |               |                  | <i>Kctd14</i>    |                              |               |
| <i>Kctd16</i>    | <i>Kctd16</i> | <i>Kctd16</i>    | <i>Kctd16</i>    |                              |               |
| <i>Kctd17</i>    |               | <i>Kctd17</i>    |                  |                              |               |
| <i>Kctd21</i>    |               | <i>Kctd21</i>    | <i>Kctd21</i>    |                              |               |
| <i>Kctd6</i>     |               |                  | <i>Kctd6</i>     |                              |               |
| <i>Kctd7</i>     | <i>Kctd7</i>  |                  |                  |                              |               |
| <i>Kctd8</i>     |               |                  | <i>Kctd8</i>     |                              |               |
| <i>Kctd9</i>     |               | <i>Kctd9</i>     | <i>Kctd9</i>     |                              |               |
| <i>Kdelc1</i>    |               | <i>Kdelc1</i>    |                  |                              |               |
| <i>Kdelc2</i>    |               | <i>Kdelc2</i>    | <i>Kdelc2</i>    |                              |               |
| <i>Kdelr3</i>    | <i>Kdelr3</i> |                  |                  |                              |               |
| <i>Kdf1</i>      |               | <i>Kdf1</i>      | <i>Kdf1</i>      |                              |               |
| <i>Kdm1a</i>     |               | <i>Kdm1a</i>     |                  |                              |               |
| <i>Kdm3b</i>     | <i>Kdm3b</i>  | <i>Kdm3b</i>     | <i>Kdm3b</i>     |                              |               |
| <i>Kdm4a</i>     |               |                  | <i>Kdm4a</i>     |                              |               |
| <i>Kdm4c</i>     | <i>Kdm4c</i>  |                  |                  |                              |               |
| <i>Kdm5a</i>     | <i>Kdm5a</i>  | <i>Kdm5a</i>     | <i>Kdm5a</i>     |                              |               |
| <i>Kdm5d</i>     |               |                  | <i>Kdm5d</i>     |                              |               |
| <i>Kdm6a</i>     |               | <i>Kdm6a</i>     | <i>Kdm6a</i>     |                              |               |
| <i>Kdm7a</i>     | <i>Kdm7a</i>  | <i>Kdm7a</i>     | <i>Kdm7a</i>     |                              |               |
| <i>Kdr</i>       | <i>Kdr</i>    | <i>Kdr</i>       |                  |                              |               |
| <i>Kdsr</i>      |               |                  | <i>Kdsr</i>      |                              | <i>Kdsr</i>   |
| <i>Keap1</i>     |               |                  | <i>Keap1</i>     |                              |               |
| <i>Keg1</i>      |               | <i>Keg1</i>      |                  |                              |               |
| <i>Khdc1b</i>    |               |                  | <i>Khdc1b</i>    |                              | <i>Khdc1b</i> |
| <i>Khdc1c</i>    |               |                  | <i>Khdc1c</i>    |                              |               |
| <i>Khdc3</i>     | <i>Khdc3</i>  | <i>Khdc3</i>     |                  |                              |               |
| <i>Khsrp</i>     | <i>Khsrp</i>  |                  |                  |                              |               |
| <i>Kidins220</i> |               | <i>Kidins220</i> | <i>Kidins220</i> |                              |               |
| <i>Kif11</i>     | <i>Kif11</i>  | <i>Kif11</i>     | <i>Kif11</i>     |                              |               |
| <i>Kif14</i>     | <i>Kif14</i>  | <i>Kif14</i>     |                  |                              |               |
| <i>Kif16b</i>    |               |                  | <i>Kif16b</i>    |                              | <i>Kif16b</i> |
| <i>Kif18b</i>    | <i>Kif18b</i> | <i>Kif18b</i>    | <i>Kif18b</i>    |                              |               |
| <i>Kif1a</i>     | <i>Kif1a</i>  | <i>Kif1a</i>     | <i>Kif1a</i>     |                              |               |
| <i>Kif1b</i>     |               |                  | <i>Kif1b</i>     |                              | <i>Kif1b</i>  |
| <i>Kif1bp</i>    |               |                  | <i>Kif1bp</i>    |                              |               |
| <i>Kif20b</i>    | <i>Kif20b</i> |                  |                  |                              |               |
| <i>Kif21a</i>    |               |                  | <i>Kif21a</i>    |                              | <i>Kif21a</i> |
| <i>Kif22</i>     | <i>Kif22</i>  |                  |                  |                              |               |
| <i>Kif23</i>     |               | <i>Kif23</i>     |                  |                              |               |
| <i>Kif26a</i>    | <i>Kif26a</i> |                  |                  |                              |               |

Suppl. Table 1  
(100/234)

|                | ChIP-Seq hits |         |         | Unique hits with interactors |      |
|----------------|---------------|---------|---------|------------------------------|------|
|                | unstimulated  | Ac      | LPS     | Ac                           | LPS  |
| <i>Kif26b</i>  | Kif26b        | Kif26b  |         |                              |      |
| <i>Kif27</i>   |               | Kif27   |         |                              |      |
| <i>Kif2a</i>   | Kif2a         | Kif2a   | Kif2a   |                              |      |
| <i>Kif2c</i>   |               | Kif2c   |         |                              |      |
| <i>Kif5b</i>   |               | Kif5b   | Kif5b   |                              |      |
| <i>Kif6</i>    | Kif6          |         |         |                              |      |
| <i>Kif7</i>    |               | Kif7    |         |                              |      |
| <i>Kif9</i>    | Kif9          |         |         |                              |      |
| <i>Kifap3</i>  |               |         | Kifap3  |                              |      |
| <i>Kifc1</i>   |               | Kifc1   | Kifc1   |                              |      |
| <i>Kifc2</i>   |               | Kifc2   |         |                              |      |
| <i>Kifc3</i>   | Kifc3         | Kifc3   |         |                              |      |
| <i>Kifc5b</i>  |               | Kifc5b  |         |                              |      |
| <i>Kin</i>     | Kin           |         |         |                              |      |
| <i>Kirrel</i>  | Kirrel        | Kirrel  |         |                              |      |
| <i>Kirrel3</i> |               | Kirrel3 |         |                              |      |
| <i>Kis2</i>    |               | Kis2    |         |                              |      |
| <i>Klb</i>     | Klb           |         |         |                              |      |
| <i>Klc1</i>    |               |         | Klc1    |                              | Klc1 |
| <i>Klc4</i>    | Klc4          |         |         |                              |      |
| <i>Klf1</i>    | Klf1          |         |         |                              |      |
| <i>Klf10</i>   | Klf10         |         |         |                              |      |
| <i>Klf11</i>   | Klf11         |         |         |                              |      |
| <i>Klf14</i>   |               | Klf14   |         |                              |      |
| <i>Klf3</i>    |               |         | Klf3    |                              |      |
| <i>Klf4</i>    |               | Klf4    |         | Klf4                         |      |
| <i>Klf5</i>    |               | Klf5    |         | Klf5                         |      |
| <i>Klf9</i>    |               |         | Klf9    |                              | Klf9 |
| <i>Klhdc1</i>  |               |         | Klhdc1  |                              |      |
| <i>Klhdc10</i> | Klhdc10       |         |         |                              |      |
| <i>Klhdc3</i>  |               |         | Klhdc3  |                              |      |
| <i>Klhdc4</i>  |               |         | Klhdc4  |                              |      |
| <i>Klhdc7b</i> |               |         | Klhdc7b |                              |      |
| <i>Klhdc8a</i> | Klhdc8a       | Klhdc8a | Klhdc8a |                              |      |
| <i>Klhl11</i>  |               |         | Klhl11  |                              |      |
| <i>Klhl13</i>  | Klhl13        |         | Klhl13  |                              |      |
| <i>Klhl14</i>  |               | Klhl14  |         |                              |      |
| <i>Klhl15</i>  |               |         | Klhl15  |                              |      |
| <i>Klhl20</i>  | Klhl20        |         |         |                              |      |
| <i>Klhl21</i>  | Klhl21        |         | Klhl21  |                              |      |
| <i>Klhl22</i>  |               |         | Klhl22  |                              |      |
| <i>Klhl23</i>  | Klhl23        |         | Klhl23  |                              |      |
| <i>Klhl24</i>  |               | Klhl24  |         |                              |      |
| <i>Klhl26</i>  |               |         | Klhl26  |                              |      |
| <i>Klhl28</i>  | Klhl28        |         | Klhl28  |                              |      |
| <i>Klhl29</i>  |               | Klhl29  | Klhl29  |                              |      |
| <i>Klhl3</i>   | Klhl3         |         | Klhl3   |                              |      |
| <i>Klhl31</i>  | Klhl31        | Klhl31  |         |                              |      |
| <i>Klhl32</i>  |               | Klhl32  |         | Klhl32                       |      |

Suppl. Table 1  
(101/234)

|                  | CHIP-Seq hits    |                  |               | Unique hits with interactors |     |
|------------------|------------------|------------------|---------------|------------------------------|-----|
|                  | unstimulated     | Ac               | LPS           | Ac                           | LPS |
| <i>Klhl36</i>    |                  |                  | <i>Klhl36</i> |                              |     |
| <i>Klhl38</i>    | <i>Klhl38</i>    |                  |               |                              |     |
| <i>Klhl40</i>    |                  |                  | <i>Klhl40</i> |                              |     |
| <i>Klhl42</i>    |                  | <i>Klhl42</i>    |               | <i>Klhl42</i>                |     |
| <i>Klhl6</i>     |                  | <i>Klhl6</i>     |               |                              |     |
| <i>Klhl7</i>     | <i>Klhl7</i>     |                  |               |                              |     |
| <i>Klhl9</i>     | <i>Klhl9</i>     |                  |               |                              |     |
| <i>Klk11</i>     |                  | <i>Klk11</i>     |               |                              |     |
| <i>Klk15</i>     |                  | <i>Klk15</i>     |               |                              |     |
| <i>Klk1b11</i>   | <i>Klk1b11</i>   |                  |               |                              |     |
| <i>Klk1b26</i>   |                  | <i>Klk1b26</i>   |               |                              |     |
| <i>Klk1b3</i>    |                  | <i>Klk1b3</i>    |               |                              |     |
| <i>Klk1b5</i>    | <i>Klk1b5</i>    |                  |               |                              |     |
| <i>Klk1b7-ps</i> | <i>Klk1b7-ps</i> |                  |               |                              |     |
| <i>Klk5</i>      |                  | <i>Klk5</i>      | <i>Klk5</i>   |                              |     |
| <i>Klk6</i>      | <i>Klk6</i>      |                  |               |                              |     |
| <i>Klkb1</i>     | <i>Klkb1</i>     |                  | <i>Klkb1</i>  |                              |     |
| <i>Klra12</i>    |                  | <i>Klra12</i>    |               |                              |     |
| <i>Klra13-ps</i> |                  | <i>Klra13-ps</i> |               |                              |     |
| <i>Klra18</i>    |                  | <i>Klra18</i>    |               |                              |     |
| <i>Klra19</i>    | <i>Klra19</i>    | <i>Klra19</i>    |               |                              |     |
| <i>Klra23</i>    |                  | <i>Klra23</i>    |               |                              |     |
| <i>Klra4</i>     |                  | <i>Klra4</i>     |               |                              |     |
| <i>Klra6</i>     | <i>Klra6</i>     | <i>Klra6</i>     |               |                              |     |
| <i>Klra9</i>     |                  | <i>Klra9</i>     | <i>Klra9</i>  |                              |     |
| <i>Klrb1</i>     | <i>Klrb1</i>     | <i>Klrb1</i>     |               |                              |     |
| <i>Klrb1b</i>    |                  |                  | <i>Klrb1b</i> |                              |     |
| <i>Klrb1-ps1</i> | <i>Klrb1-ps1</i> |                  |               |                              |     |
| <i>Klrc1</i>     |                  |                  | <i>Klrc1</i>  |                              |     |
| <i>Klrd1</i>     | <i>Klrd1</i>     | <i>Klrd1</i>     |               |                              |     |
| <i>Klre1</i>     | <i>Klre1</i>     |                  |               |                              |     |
| <i>Klrg1</i>     |                  |                  | <i>Klrg1</i>  |                              |     |
| <i>Kmt2a</i>     |                  | <i>Kmt2a</i>     |               | <i>Kmt2a</i>                 |     |
| <i>Kmt2c</i>     |                  |                  | <i>Kmt2c</i>  |                              |     |
| <i>Kmt2d</i>     |                  | <i>Kmt2d</i>     | <i>Kmt2d</i>  |                              |     |
| <i>Kndc1</i>     | <i>Kndc1</i>     |                  | <i>Kndc1</i>  |                              |     |
| <i>Kng1</i>      |                  | <i>Kng1</i>      |               |                              |     |
| <i>Knop1</i>     | <i>Knop1</i>     | <i>Knop1</i>     |               |                              |     |
| <i>Knstrn</i>    |                  | <i>Knstrn</i>    |               |                              |     |
| <i>Kntc1</i>     |                  | <i>Kntc1</i>     | <i>Kntc1</i>  |                              |     |
| <i>Kpna1</i>     |                  |                  | <i>Kpna1</i>  |                              |     |
| <i>Kpna2</i>     | <i>Kpna2</i>     | <i>Kpna2</i>     | <i>Kpna2</i>  |                              |     |
| <i>Kpna3</i>     |                  |                  | <i>Kpna3</i>  |                              |     |
| <i>Kpna4</i>     |                  |                  | <i>Kpna4</i>  |                              |     |
| <i>Kpna7</i>     |                  |                  | <i>Kpna7</i>  |                              |     |
| <i>Kpnb1</i>     |                  | <i>Kpnb1</i>     | <i>Kpnb1</i>  |                              |     |
| <i>Kptn</i>      | <i>Kptn</i>      |                  | <i>Kptn</i>   |                              |     |
| <i>Kras</i>      | <i>Kras</i>      |                  |               |                              |     |
| <i>Krcc1</i>     |                  | <i>Krcc1</i>     |               |                              |     |

Suppl. Table 1  
(102/234)

|                  | CHIP-Seq hits |           |           | Unique hits with interactors |     |
|------------------|---------------|-----------|-----------|------------------------------|-----|
|                  | unstimulated  | Ac        | LPS       | Ac                           | LPS |
| <i>Kremen1</i>   |               | Kremen1   | Kremen1   |                              |     |
| <i>Krit1</i>     |               |           | Krit1     |                              |     |
| <i>Krt10</i>     |               | Krt10     |           |                              |     |
| <i>Krt12</i>     |               |           | Krt12     |                              |     |
| <i>Krt13</i>     |               | Krt13     |           |                              |     |
| <i>Krt15</i>     |               | Krt15     |           |                              |     |
| <i>Krt17</i>     | Krt17         |           |           |                              |     |
| <i>Krt23</i>     |               | Krt23     |           |                              |     |
| <i>Krt24</i>     |               | Krt24     |           |                              |     |
| <i>Krt25</i>     |               |           | Krt25     |                              |     |
| <i>Krt26</i>     |               | Krt26     | Krt26     |                              |     |
| <i>Krt27</i>     |               | Krt27     |           |                              |     |
| <i>Krt28</i>     |               |           | Krt28     |                              |     |
| <i>Krt31</i>     |               | Krt31     |           |                              |     |
| <i>Krt33a</i>    | Krt33a        | Krt33a    |           |                              |     |
| <i>Krt33b</i>    | Krt33b        | Krt33b    |           |                              |     |
| <i>Krt34</i>     |               | Krt34     |           |                              |     |
| <i>Krt35</i>     |               | Krt35     |           |                              |     |
| <i>Krt36</i>     |               |           | Krt36     |                              |     |
| <i>Krt39</i>     |               | Krt39     |           |                              |     |
| <i>Krt6a</i>     |               | Krt6a     |           |                              |     |
| <i>Krt71</i>     |               | Krt71     |           |                              |     |
| <i>Krt75</i>     |               | Krt75     |           |                              |     |
| <i>Krt76</i>     |               | Krt76     |           |                              |     |
| <i>Krt78</i>     |               | Krt78     |           |                              |     |
| <i>Krt80</i>     |               |           | Krt80     |                              |     |
| <i>Krt84</i>     |               | Krt84     |           |                              |     |
| <i>Krt85</i>     |               | Krt85     |           |                              |     |
| <i>Krt9</i>      |               | Krt9      |           |                              |     |
| <i>Krtap11-1</i> | Krtap11-1     |           |           |                              |     |
| <i>Krtap12-1</i> |               |           | Krtap12-1 |                              |     |
| <i>Krtap1-3</i>  |               |           | Krtap1-3  |                              |     |
| <i>Krtap13</i>   | Krtap13       |           | Krtap13   |                              |     |
| <i>Krtap13-1</i> |               |           | Krtap13-1 |                              |     |
| <i>Krtap14</i>   |               | Krtap14   |           |                              |     |
| <i>Krtap19-5</i> | Krtap19-5     | Krtap19-5 |           |                              |     |
| <i>Krtap27-1</i> |               | Krtap27-1 | Krtap27-1 |                              |     |
| <i>Krtap3-2</i>  |               | Krtap3-2  | Krtap3-2  |                              |     |
| <i>Krtap4-1</i>  |               |           | Krtap4-1  |                              |     |
| <i>Krtap4-7</i>  |               | Krtap4-7  |           |                              |     |
| <i>Krtap5-1</i>  |               | Krtap5-1  |           |                              |     |
| <i>Krtap5-2</i>  | Krtap5-2      |           |           |                              |     |
| <i>Krtap5-3</i>  |               | Krtap5-3  |           |                              |     |
| <i>Krtap5-4</i>  |               | Krtap5-4  |           |                              |     |
| <i>Krtap6-2</i>  |               |           | Krtap6-2  |                              |     |
| <i>Krtcap2</i>   |               | Krtcap2   |           |                              |     |
| <i>Krtdap</i>    | Krtdap        |           |           |                              |     |
| <i>Ksr1</i>      |               | Ksr1      |           |                              |     |
| <i>Ksr2</i>      |               | Ksr2      |           |                              |     |

Suppl. Table 1  
(103/234)

|                | ChIP-Seq hits |         |         | Unique hits with interactors |       |
|----------------|---------------|---------|---------|------------------------------|-------|
|                | unstimulated  | Ac      | LPS     | Ac                           | LPS   |
| <i>Kti12</i>   | Kti12         |         |         |                              |       |
| <i>Ktn1</i>    | Ktn1          | Ktn1    |         |                              |       |
| <i>Kxd1</i>    |               | Kxd1    |         |                              |       |
| <i>L2hgdh</i>  | L2hgdh        |         | L2hgdh  |                              |       |
| <i>L3mbt1</i>  |               | L3mbt1  | L3mbt1  |                              |       |
| <i>I7Rn6</i>   | I7Rn6         |         | I7Rn6   |                              |       |
| <i>Lace1</i>   | Lace1         |         |         |                              |       |
| <i>Lactb</i>   |               | Lactb   |         |                              |       |
| <i>Lactb2</i>  | Lactb2        | Lactb2  | Lactb2  |                              |       |
| <i>Lactbl1</i> | Lactbl1       | Lactbl1 |         |                              |       |
| <i>Lad1</i>    |               | Lad1    |         |                              |       |
| <i>Lage3</i>   |               |         | Lage3   |                              |       |
| <i>Lama2</i>   | Lama2         |         |         |                              |       |
| <i>Lama3</i>   |               | Lama3   |         |                              |       |
| <i>Lamb1</i>   | Lamb1         |         |         |                              |       |
| <i>Lamb2</i>   |               | Lamb2   | Lamb2   |                              |       |
| <i>Lamp3</i>   | Lamp3         |         |         |                              |       |
| <i>Lamtor1</i> | Lamtor1       | Lamtor1 |         |                              |       |
| <i>Lamtor3</i> | Lamtor3       |         | Lamtor3 |                              |       |
| <i>Lamtor4</i> |               |         | Lamtor4 |                              |       |
| <i>Lamtor5</i> |               | Lamtor5 |         |                              |       |
| <i>Lancl1</i>  | Lancl1        |         |         |                              |       |
| <i>Laptm4a</i> |               |         | Laptm4a |                              |       |
| <i>Laptm4b</i> |               |         | Laptm4b |                              |       |
| <i>Laptm5</i>  |               | Laptm5  |         |                              |       |
| <i>Larp1</i>   | Larp1         | Larp1   | Larp1   |                              |       |
| <i>Larp1b</i>  | Larp1b        | Larp1b  | Larp1b  |                              |       |
| <i>Larp4</i>   | Larp4         | Larp4   | Larp4   |                              |       |
| <i>Las1l</i>   |               |         | Las1l   |                              |       |
| <i>Lasp1</i>   |               |         | Lasp1   |                              |       |
| <i>Lat2</i>    |               | Lat2    | Lat2    |                              |       |
| <i>Lats1</i>   |               |         | Lats1   |                              | Lats1 |
| <i>Lbhd1</i>   | Lbhd1         |         |         |                              |       |
| <i>Lbx2</i>    |               |         | Lbx2    |                              |       |
| <i>Lcat</i>    |               |         | Lcat    |                              |       |
| <i>Lce1a1</i>  | Lce1a1        | Lce1a1  | Lce1a1  |                              |       |
| <i>Lce1d</i>   |               | Lce1d   |         |                              |       |
| <i>Lce1e</i>   |               |         | Lce1e   |                              |       |
| <i>Lce1g</i>   |               | Lce1g   |         |                              |       |
| <i>Lce1h</i>   |               |         | Lce1h   |                              |       |
| <i>Lce1j</i>   |               | Lce1j   |         |                              |       |
| <i>Lce1l</i>   |               | Lce1l   |         |                              |       |
| <i>Lce3b</i>   |               | Lce3b   |         |                              |       |
| <i>Lce3c</i>   |               |         | Lce3c   |                              |       |
| <i>Lce3e</i>   | Lce3e         | Lce3e   |         |                              |       |
| <i>Lce6a</i>   |               | Lce6a   |         |                              |       |
| <i>Lclat1</i>  | Lclat1        |         |         |                              |       |
| <i>Lcn12</i>   |               | Lcn12   | Lcn12   |                              |       |
| <i>Lcn2</i>    | Lcn2          |         |         |                              |       |

Suppl. Table 1  
(104/234)

|                 | CHIP-Seq hits  |                 |                 | Unique hits with interactors |                |
|-----------------|----------------|-----------------|-----------------|------------------------------|----------------|
|                 | unstimulated   | Ac              | LPS             | Ac                           | LPS            |
| <i>Lcn4</i>     |                | <i>Lcn4</i>     |                 |                              |                |
| <i>Lcn5</i>     |                | <i>Lcn5</i>     |                 |                              |                |
| <i>Lcor</i>     |                | <i>Lcor</i>     |                 | <i>Lcor</i>                  |                |
| <i>Lcorl</i>    | <i>Lcorl</i>   | <i>Lcorl</i>    |                 |                              |                |
| <i>Lcp2</i>     |                | <i>Lcp2</i>     |                 |                              |                |
| <i>Lctl</i>     | <i>Lctl</i>    |                 |                 |                              |                |
| <i>Ldb1</i>     | <i>Ldb1</i>    | <i>Ldb1</i>     | <i>Ldb1</i>     |                              |                |
| <i>Ldha</i>     |                | <i>Ldha</i>     |                 |                              |                |
| <i>Ldhal6b</i>  | <i>Ldhal6b</i> | <i>Ldhal6b</i>  |                 |                              |                |
| <i>Ldhb</i>     | <i>Ldhb</i>    |                 |                 |                              |                |
| <i>Ldhd</i>     |                | <i>Ldhd</i>     |                 |                              |                |
| <i>Ldlr</i>     | <i>Ldlr</i>    | <i>Ldlr</i>     | <i>Ldlr</i>     |                              |                |
| <i>Ldlrad2</i>  |                |                 | <i>Ldlrad2</i>  |                              | <i>Ldlrad2</i> |
| <i>Ldlrap1</i>  |                |                 | <i>Ldlrap1</i>  |                              |                |
| <i>Leap2</i>    | <i>Leap2</i>   | <i>Leap2</i>    | <i>Leap2</i>    |                              |                |
| <i>Lefty2</i>   | <i>Lefty2</i>  |                 |                 |                              |                |
| <i>Lekr1</i>    |                | <i>Lekr1</i>    |                 |                              |                |
| <i>Lelp1</i>    |                |                 | <i>Lelp1</i>    |                              |                |
| <i>Lemd1</i>    |                |                 | <i>Lemd1</i>    |                              |                |
| <i>Lemd2</i>    |                | <i>Lemd2</i>    |                 |                              |                |
| <i>Lemd3</i>    |                | <i>Lemd3</i>    |                 |                              |                |
| <i>Lenep</i>    |                | <i>Lenep</i>    | <i>Lenep</i>    |                              |                |
| <i>Leng1</i>    |                | <i>Leng1</i>    | <i>Leng1</i>    |                              |                |
| <i>Leng9</i>    | <i>Leng9</i>   |                 |                 |                              |                |
| <i>Lep</i>      | <i>Lep</i>     | <i>Lep</i>      |                 |                              |                |
| <i>Lepr</i>     |                |                 | <i>Lepr</i>     |                              | <i>Lepr</i>    |
| <i>Leprot</i>   | <i>Leprot</i>  |                 |                 |                              |                |
| <i>Letm1</i>    | <i>Letm1</i>   |                 |                 |                              |                |
| <i>Letmd1</i>   |                |                 | <i>Letmd1</i>   |                              |                |
| <i>Lfng</i>     | <i>Lfng</i>    |                 |                 |                              |                |
| <i>Lgals12</i>  |                | <i>Lgals12</i>  |                 |                              |                |
| <i>Lgals2</i>   | <i>Lgals2</i>  | <i>Lgals2</i>   | <i>Lgals2</i>   |                              |                |
| <i>Lgals3</i>   | <i>Lgals3</i>  |                 |                 |                              |                |
| <i>Lgals3bp</i> |                | <i>Lgals3bp</i> | <i>Lgals3bp</i> |                              |                |
| <i>Lgals4</i>   |                | <i>Lgals4</i>   | <i>Lgals4</i>   |                              |                |
| <i>Lgals6</i>   |                | <i>Lgals6</i>   | <i>Lgals6</i>   |                              |                |
| <i>Lgals7</i>   | <i>Lgals7</i>  |                 |                 |                              |                |
| <i>Lgals8</i>   | <i>Lgals8</i>  | <i>Lgals8</i>   | <i>Lgals8</i>   |                              |                |
| <i>Lgi1</i>     |                | <i>Lgi1</i>     | <i>Lgi1</i>     |                              |                |
| <i>Lgi4</i>     | <i>Lgi4</i>    |                 |                 |                              |                |
| <i>Lgr4</i>     |                | <i>Lgr4</i>     |                 | <i>Lgr4</i>                  |                |
| <i>Lgr5</i>     |                |                 | <i>Lgr5</i>     |                              |                |
| <i>Lhcgr</i>    | <i>Lhcgr</i>   |                 |                 |                              |                |
| <i>Lhfp11</i>   |                | <i>Lhfp11</i>   |                 |                              |                |
| <i>Lhfp13</i>   |                |                 | <i>Lhfp13</i>   |                              | <i>Lhfp13</i>  |
| <i>Lhfp15</i>   |                | <i>Lhfp15</i>   |                 |                              |                |
| <i>Lhx1</i>     |                |                 | <i>Lhx1</i>     |                              |                |
| <i>Lhx1os</i>   | <i>Lhx1os</i>  | <i>Lhx1os</i>   |                 |                              |                |
| <i>Lhx2</i>     |                |                 | <i>Lhx2</i>     |                              |                |



Suppl. Table 1  
(105/234)

|                     | CHIP-Seq hits       |                     |                     | Unique hits with interactors |               |
|---------------------|---------------------|---------------------|---------------------|------------------------------|---------------|
|                     | unstimulated        | Ac                  | LPS                 | Ac                           | LPS           |
| <i>Lhx8</i>         |                     | <i>Lhx8</i>         |                     |                              |               |
| <i>Lifr</i>         | <i>Lifr</i>         |                     |                     |                              |               |
| <i>Lig1</i>         |                     | <i>Lig1</i>         |                     |                              |               |
| <i>Lig4</i>         |                     | <i>Lig4</i>         |                     |                              |               |
| <i>Lilra5</i>       |                     |                     | <i>Lilra5</i>       |                              |               |
| <i>Lilra6</i>       | <i>Lilra6</i>       |                     |                     |                              |               |
| <i>Lilrb4</i>       |                     |                     | <i>Lilrb4</i>       |                              |               |
| <i>Lima1</i>        | <i>Lima1</i>        | <i>Lima1</i>        | <i>Lima1</i>        |                              |               |
| <i>Limd1</i>        | <i>Limd1</i>        | <i>Limd1</i>        | <i>Limd1</i>        |                              |               |
| <i>Limk1</i>        |                     | <i>Limk1</i>        |                     |                              |               |
| <i>Limk2</i>        | <i>Limk2</i>        | <i>Limk2</i>        | <i>Limk2</i>        |                              |               |
| <i>Lims1</i>        |                     | <i>Lims1</i>        | <i>Lims1</i>        |                              |               |
| <i>Lin28a</i>       |                     |                     | <i>Lin28a</i>       |                              | <i>Lin28a</i> |
| <i>Lin28b</i>       |                     |                     | <i>Lin28b</i>       |                              |               |
| <i>Lin37</i>        | <i>Lin37</i>        | <i>Lin37</i>        | <i>Lin37</i>        |                              |               |
| <i>Lin54</i>        | <i>Lin54</i>        |                     | <i>Lin54</i>        |                              |               |
| <i>Lin9</i>         |                     | <i>Lin9</i>         | <i>Lin9</i>         |                              |               |
| <i>Lincenc1</i>     | <i>Lincenc1</i>     |                     |                     |                              |               |
| <i>Lingo2</i>       | <i>Lingo2</i>       | <i>Lingo2</i>       |                     |                              |               |
| <i>Lins</i>         |                     |                     | <i>Lins</i>         |                              |               |
| <i>Lipa</i>         |                     |                     | <i>Lipa</i>         |                              |               |
| <i>Lipe</i>         |                     |                     | <i>Lipe</i>         |                              |               |
| <i>Lipi</i>         |                     | <i>Lipi</i>         |                     |                              |               |
| <i>Lipk</i>         | <i>Lipk</i>         |                     | <i>Lipk</i>         |                              |               |
| <i>Lipm</i>         |                     | <i>Lipm</i>         |                     |                              |               |
| <i>Lipn</i>         |                     | <i>Lipn</i>         |                     |                              |               |
| <i>Lipo1</i>        |                     | <i>Lipo1</i>        |                     |                              |               |
| <i>Lipt2</i>        |                     | <i>Lipt2</i>        |                     |                              |               |
| <i>Litaf</i>        | <i>Litaf</i>        | <i>Litaf</i>        |                     |                              |               |
| <i>Lkaaear1</i>     |                     |                     | <i>Lkaaear1</i>     |                              |               |
| <i>Llgl1</i>        |                     |                     | <i>Llgl1</i>        |                              |               |
| <i>Lman1</i>        |                     |                     | <i>Lman1</i>        |                              | <i>Lman1</i>  |
| <i>Lmbrd2</i>       |                     | <i>Lmbrd2</i>       | <i>Lmbrd2</i>       |                              |               |
| <i>Lmcd1</i>        |                     |                     | <i>Lmcd1</i>        |                              |               |
| <i>Lmf1</i>         |                     |                     | <i>Lmf1</i>         |                              |               |
| <i>Lmln</i>         |                     | <i>Lmln</i>         |                     |                              |               |
| <i>Lmna</i>         | <i>Lmna</i>         |                     | <i>Lmna</i>         |                              |               |
| <i>Lmo1</i>         |                     | <i>Lmo1</i>         |                     |                              |               |
| <i>Lmo2</i>         |                     | <i>Lmo2</i>         | <i>Lmo2</i>         |                              |               |
| <i>Lmod2</i>        |                     | <i>Lmod2</i>        |                     |                              |               |
| <i>Lmod3</i>        |                     | <i>Lmod3</i>        | <i>Lmod3</i>        |                              |               |
| <i>Lmtk3</i>        | <i>Lmtk3</i>        | <i>Lmtk3</i>        | <i>Lmtk3</i>        |                              |               |
| <i>Lmx1a</i>        |                     |                     | <i>Lmx1a</i>        |                              |               |
| <i>Lncbate1</i>     | <i>Lncbate1</i>     |                     |                     |                              |               |
| <i>Lnp</i>          |                     | <i>Lnp</i>          | <i>Lnp</i>          |                              |               |
| <i>Ln timer</i>     |                     | <i>Ln timer</i>     |                     |                              |               |
| <i>LOC100038947</i> | <i>LOC100038947</i> | <i>LOC100038947</i> | <i>LOC100038947</i> |                              |               |
| <i>LOC100043315</i> |                     | <i>LOC100043315</i> |                     |                              |               |
| <i>LOC100048884</i> | <i>LOC100048884</i> | <i>LOC100048884</i> | <i>LOC100048884</i> |                              |               |

Suppl. Table 1  
(106/234)

|                     | CHIP-Seq hits       |                     |                     | Unique hits with interactors |     |
|---------------------|---------------------|---------------------|---------------------|------------------------------|-----|
|                     | unstimulated        | Ac                  | LPS                 | Ac                           | LPS |
| <i>LOC100125594</i> |                     |                     | <i>LOC100125594</i> |                              |     |
| <i>LOC100504039</i> |                     |                     | <i>LOC100504039</i> |                              |     |
| <i>LOC100504703</i> |                     | <i>LOC100504703</i> |                     |                              |     |
| <i>LOC100505025</i> |                     | <i>LOC100505025</i> |                     |                              |     |
| <i>LOC100861978</i> |                     |                     | <i>LOC100861978</i> |                              |     |
| <i>LOC100862015</i> |                     | <i>LOC100862015</i> |                     |                              |     |
| <i>LOC101055863</i> | <i>LOC101055863</i> | <i>LOC101055863</i> | <i>LOC101055863</i> |                              |     |
| <i>LOC102631757</i> | <i>LOC102631757</i> |                     |                     |                              |     |
| <i>LOC102634401</i> |                     |                     | <i>LOC102634401</i> |                              |     |
| <i>LOC105245869</i> | <i>LOC105245869</i> |                     |                     |                              |     |
| <i>LOC666331</i>    |                     |                     | <i>LOC666331</i>    |                              |     |
| <i>Loh12cr1</i>     |                     | <i>Loh12cr1</i>     |                     |                              |     |
| <i>Lonp1</i>        | <i>Lonp1</i>        | <i>Lonp1</i>        |                     |                              |     |
| <i>Lonp2</i>        | <i>Lonp2</i>        |                     | <i>Lonp2</i>        |                              |     |
| <i>Lonrf1</i>       |                     | <i>Lonrf1</i>       | <i>Lonrf1</i>       |                              |     |
| <i>Lonrf2</i>       |                     |                     | <i>Lonrf2</i>       |                              |     |
| <i>Lonrf3</i>       | <i>Lonrf3</i>       | <i>Lonrf3</i>       | <i>Lonrf3</i>       |                              |     |
| <i>Lor</i>          |                     | <i>Lor</i>          | <i>Lor</i>          |                              |     |
| <i>Loxhd1</i>       | <i>Loxhd1</i>       |                     | <i>Loxhd1</i>       |                              |     |
| <i>Loxl3</i>        | <i>Loxl3</i>        |                     |                     |                              |     |
| <i>Loxl4</i>        |                     | <i>Loxl4</i>        |                     |                              |     |
| <i>Lpar1</i>        | <i>Lpar1</i>        | <i>Lpar1</i>        | <i>Lpar1</i>        |                              |     |
| <i>Lpar4</i>        |                     | <i>Lpar4</i>        |                     |                              |     |
| <i>Lpar6</i>        |                     | <i>Lpar6</i>        |                     |                              |     |
| <i>Lpcat1</i>       |                     |                     | <i>Lpcat1</i>       |                              |     |
| <i>Lpcat3</i>       |                     | <i>Lpcat3</i>       | <i>Lpcat3</i>       |                              |     |
| <i>Lpcat4</i>       |                     | <i>Lpcat4</i>       | <i>Lpcat4</i>       |                              |     |
| <i>Lpin2</i>        |                     | <i>Lpin2</i>        | <i>Lpin2</i>        |                              |     |
| <i>Lpl</i>          |                     | <i>Lpl</i>          |                     | <i>Lpl</i>                   |     |
| <i>Lpo</i>          |                     | <i>Lpo</i>          |                     |                              |     |
| <i>Lpp</i>          |                     | <i>Lpp</i>          |                     | <i>Lpp</i>                   |     |
| <i>Lppos</i>        | <i>Lppos</i>        |                     | <i>Lppos</i>        |                              |     |
| <i>Lppr3</i>        |                     |                     | <i>Lppr3</i>        |                              |     |
| <i>Lppr4</i>        | <i>Lppr4</i>        |                     |                     |                              |     |
| <i>Lppr5</i>        |                     | <i>Lppr5</i>        |                     |                              |     |
| <i>Lpxn</i>         |                     | <i>Lpxn</i>         |                     |                              |     |
| <i>Lrch1</i>        | <i>Lrch1</i>        | <i>Lrch1</i>        | <i>Lrch1</i>        |                              |     |
| <i>Lrch3</i>        |                     |                     | <i>Lrch3</i>        |                              |     |
| <i>Lrch4</i>        | <i>Lrch4</i>        | <i>Lrch4</i>        |                     |                              |     |
| <i>Lrcol1</i>       | <i>Lrcol1</i>       |                     |                     |                              |     |
| <i>Lrfn1</i>        |                     | <i>Lrfn1</i>        | <i>Lrfn1</i>        |                              |     |
| <i>Lrfn4</i>        | <i>Lrfn4</i>        |                     |                     |                              |     |
| <i>Lrg1</i>         | <i>Lrg1</i>         | <i>Lrg1</i>         | <i>Lrg1</i>         |                              |     |
| <i>Lrguk</i>        |                     |                     | <i>Lrguk</i>        |                              |     |
| <i>Lrig1</i>        |                     | <i>Lrig1</i>        |                     |                              |     |
| <i>Lrig2</i>        |                     | <i>Lrig2</i>        | <i>Lrig2</i>        |                              |     |
| <i>Lrig3</i>        |                     | <i>Lrig3</i>        | <i>Lrig3</i>        |                              |     |
| <i>Lrit1</i>        | <i>Lrit1</i>        |                     |                     |                              |     |
| <i>Lrit2</i>        |                     | <i>Lrit2</i>        | <i>Lrit2</i>        |                              |     |

Suppl. Table 1  
(107/234)

|                | CHIP-Seq hits |         |         | Unique hits with interactors |      |
|----------------|---------------|---------|---------|------------------------------|------|
|                | unstimulated  | Ac      | LPS     | Ac                           | LPS  |
| <i>Lrit3</i>   | Lrit3         |         |         |                              |      |
| <i>Lrmp</i>    | Lrmp          |         |         |                              |      |
| <i>Lrp1</i>    | Lrp1          | Lrp1    | Lrp1    |                              |      |
| <i>Lrp11</i>   | Lrp11         |         |         |                              |      |
| <i>Lrp1b</i>   |               | Lrp1b   |         | Lrp1b                        |      |
| <i>Lrp2bp</i>  |               | Lrp2bp  |         | Lrp2bp                       |      |
| <i>Lrp4</i>    |               |         | Lrp4    |                              | Lrp4 |
| <i>Lrp5</i>    |               |         | Lrp5    |                              |      |
| <i>Lrp8</i>    |               | Lrp8    | Lrp8    |                              |      |
| <i>Lrpap1</i>  | Lrpap1        |         | Lrpap1  |                              |      |
| <i>Lrr1</i>    | Lrr1          | Lrr1    | Lrr1    |                              |      |
| <i>Lrrc1</i>   |               | Lrrc1   |         |                              |      |
| <i>Lrrc10</i>  |               |         | Lrrc10  |                              |      |
| <i>Lrrc10b</i> |               | Lrrc10b |         |                              |      |
| <i>Lrrc14</i>  |               |         | Lrrc14  |                              |      |
| <i>Lrrc14b</i> |               | Lrrc14b |         |                              |      |
| <i>Lrrc16a</i> |               |         | Lrrc16a |                              |      |
| <i>Lrrc19</i>  |               |         | Lrrc19  |                              |      |
| <i>Lrrc2</i>   | Lrrc2         | Lrrc2   | Lrrc2   |                              |      |
| <i>Lrrc20</i>  |               | Lrrc20  |         |                              |      |
| <i>Lrrc23</i>  | Lrrc23        |         |         |                              |      |
| <i>Lrrc24</i>  |               | Lrrc24  |         |                              |      |
| <i>Lrrc26</i>  |               |         | Lrrc26  |                              |      |
| <i>Lrrc27</i>  | Lrrc27        |         |         |                              |      |
| <i>Lrrc3</i>   | Lrrc3         | Lrrc3   |         |                              |      |
| <i>Lrrc34</i>  |               |         | Lrrc34  |                              |      |
| <i>Lrrc36</i>  |               |         | Lrrc36  |                              |      |
| <i>Lrrc40</i>  | Lrrc40        |         | Lrrc40  |                              |      |
| <i>Lrrc41</i>  | Lrrc41        | Lrrc41  | Lrrc41  |                              |      |
| <i>Lrrc42</i>  |               |         | Lrrc42  |                              |      |
| <i>Lrrc43</i>  |               |         | Lrrc43  |                              |      |
| <i>Lrrc46</i>  | Lrrc46        | Lrrc46  | Lrrc46  |                              |      |
| <i>Lrrc48</i>  |               | Lrrc48  |         |                              |      |
| <i>Lrrc4b</i>  | Lrrc4b        |         | Lrrc4b  |                              |      |
| <i>Lrrc57</i>  |               |         | Lrrc57  |                              |      |
| <i>Lrrc58</i>  | Lrrc58        |         |         |                              |      |
| <i>Lrrc63</i>  | Lrrc63        |         |         |                              |      |
| <i>Lrrc69</i>  |               | Lrrc69  |         |                              |      |
| <i>Lrrc75a</i> | Lrrc75a       |         |         |                              |      |
| <i>Lrrc8b</i>  |               | Lrrc8b  | Lrrc8b  |                              |      |
| <i>Lrrc8c</i>  |               | Lrrc8c  | Lrrc8c  |                              |      |
| <i>Lrrc8e</i>  |               | Lrrc8e  | Lrrc8e  |                              |      |
| <i>Lrrc9</i>   |               |         | Lrrc9   |                              |      |
| <i>Lrrfip1</i> |               | Lrrfip1 |         |                              |      |
| <i>Lrrfip2</i> |               |         | Lrrfip2 |                              |      |
| <i>Lrriq4</i>  |               |         | Lrriq4  |                              |      |
| <i>Lrrk1</i>   |               | Lrrk1   | Lrrk1   |                              |      |
| <i>Lrrk2</i>   |               | Lrrk2   |         | Lrrk2                        |      |
| <i>Lrrtm3</i>  | Lrrtm3        |         | Lrrtm3  |                              |      |

Suppl. Table 1  
(108/234)

|               | CHIP-Seq hits |               |               | Unique hits with interactors |               |
|---------------|---------------|---------------|---------------|------------------------------|---------------|
|               | unstimulated  | Ac            | LPS           | Ac                           | LPS           |
| <i>Lrrtm4</i> |               |               | <i>Lrrtm4</i> |                              |               |
| <i>Lrtm1</i>  |               |               | <i>Lrtm1</i>  |                              | <i>Lrtm1</i>  |
| <i>Lrtm2</i>  |               | <i>Lrtm2</i>  |               |                              |               |
| <i>Lsamp</i>  |               |               | <i>Lsamp</i>  |                              | <i>Lsamp</i>  |
| <i>Lsg1</i>   |               | <i>Lsg1</i>   | <i>Lsg1</i>   |                              |               |
| <i>Lsm10</i>  |               |               | <i>Lsm10</i>  |                              |               |
| <i>Lsm11</i>  |               | <i>Lsm11</i>  |               |                              |               |
| <i>Lsm3</i>   |               |               | <i>Lsm3</i>   |                              |               |
| <i>Lsm5</i>   |               | <i>Lsm5</i>   |               |                              |               |
| <i>Lsm6</i>   |               | <i>Lsm6</i>   |               | <i>Lsm6</i>                  |               |
| <i>Lsm7</i>   | <i>Lsm7</i>   | <i>Lsm7</i>   |               |                              |               |
| <i>Lsm8</i>   |               | <i>Lsm8</i>   |               |                              |               |
| <i>Lsmem1</i> | <i>Lsmem1</i> | <i>Lsmem1</i> | <i>Lsmem1</i> |                              |               |
| <i>Lsr</i>    |               | <i>Lsr</i>    | <i>Lsr</i>    |                              |               |
| <i>Lst1</i>   |               | <i>Lst1</i>   | <i>Lst1</i>   |                              |               |
| <i>Lta</i>    |               |               | <i>Lta</i>    |                              |               |
| <i>Lta4h</i>  | <i>Lta4h</i>  |               |               |                              |               |
| <i>Ltb</i>    |               | <i>Ltb</i>    | <i>Ltb</i>    |                              |               |
| <i>Ltb4r1</i> |               | <i>Ltb4r1</i> | <i>Ltb4r1</i> |                              |               |
| <i>Ltb4r2</i> |               | <i>Ltb4r2</i> |               |                              |               |
| <i>Ltbp1</i>  |               | <i>Ltbp1</i>  | <i>Ltbp1</i>  |                              |               |
| <i>Ltbr</i>   |               |               | <i>Ltbr</i>   |                              |               |
| <i>Ltc4s</i>  |               | <i>Ltc4s</i>  | <i>Ltc4s</i>  |                              |               |
| <i>Ltf</i>    |               | <i>Ltf</i>    | <i>Ltf</i>    |                              |               |
| <i>Ltn1</i>   |               | <i>Ltn1</i>   |               |                              |               |
| <i>Ltv1</i>   |               | <i>Ltv1</i>   |               |                              |               |
| <i>Luc7l</i>  | <i>Luc7l</i>  | <i>Luc7l</i>  | <i>Luc7l</i>  |                              |               |
| <i>Luc7l2</i> |               | <i>Luc7l2</i> | <i>Luc7l2</i> |                              |               |
| <i>Luc7l3</i> |               |               | <i>Luc7l3</i> |                              | <i>Luc7l3</i> |
| <i>Lum</i>    |               |               | <i>Lum</i>    |                              |               |
| <i>Luzp4</i>  |               | <i>Luzp4</i>  |               |                              |               |
| <i>Lvrn</i>   |               |               | <i>Lvrn</i>   |                              |               |
| <i>Ly6a</i>   | <i>Ly6a</i>   | <i>Ly6a</i>   | <i>Ly6a</i>   |                              |               |
| <i>Ly6c2</i>  |               | <i>Ly6c2</i>  |               |                              |               |
| <i>Ly6g5b</i> | <i>Ly6g5b</i> |               | <i>Ly6g5b</i> |                              |               |
| <i>Ly6g5c</i> |               |               | <i>Ly6g5c</i> |                              |               |
| <i>Ly6g6c</i> |               | <i>Ly6g6c</i> | <i>Ly6g6c</i> |                              |               |
| <i>Ly6g6f</i> |               | <i>Ly6g6f</i> |               |                              |               |
| <i>Ly6h</i>   |               |               | <i>Ly6h</i>   |                              |               |
| <i>Ly9</i>    |               | <i>Ly9</i>    |               |                              |               |
| <i>Lyg1</i>   |               | <i>Lyg1</i>   | <i>Lyg1</i>   |                              |               |
| <i>Lyn</i>    | <i>Lyn</i>    |               | <i>Lyn</i>    |                              |               |
| <i>Lypd5</i>  |               |               | <i>Lypd5</i>  |                              |               |
| <i>Lyrm2</i>  |               | <i>Lyrm2</i>  |               |                              |               |
| <i>Lyrm4</i>  |               |               | <i>Lyrm4</i>  |                              |               |
| <i>Lyrm7</i>  |               |               | <i>Lyrm7</i>  |                              |               |
| <i>Lysmd1</i> |               |               | <i>Lysmd1</i> |                              |               |
| <i>Lysmd2</i> |               |               | <i>Lysmd2</i> |                              |               |
| <i>Lysmd4</i> |               |               | <i>Lysmd4</i> |                              |               |

Suppl. Table 1  
(109/234)

|                 | CHIP-Seq hits |         |         | Unique hits with interactors |       |
|-----------------|---------------|---------|---------|------------------------------|-------|
|                 | unstimulated  | Ac      | LPS     | Ac                           | LPS   |
| <i>Lyve1</i>    | Lyve1         |         |         |                              |       |
| <i>Lyz2</i>     |               | Lyz2    |         |                              |       |
| <i>Lyzl1</i>    |               | Lyzl1   |         |                              |       |
| <i>Lyzl4</i>    | Lyzl4         |         |         |                              |       |
| <i>Lyzl4os</i>  |               | Lyzl4os |         |                              |       |
| <i>Lzts2</i>    |               | Lzts2   | Lzts2   |                              |       |
| <i>Lzts3</i>    |               | Lzts3   | Lzts3   |                              |       |
| <i>M1ap</i>     | M1ap          |         |         |                              |       |
| <i>M6pr</i>     | M6pr          |         |         |                              |       |
| <i>Maats1</i>   |               | Maats1  |         |                              |       |
| <i>Mab21l3</i>  |               |         | Mab21l3 |                              |       |
| <i>Macf1</i>    |               | Macf1   |         | Macf1                        |       |
| <i>Macro1</i>   |               | Macro1  |         |                              |       |
| <i>Macro2</i>   |               | Macro2  |         |                              |       |
| <i>Mad2l1</i>   |               | Mad2l1  | Mad2l1  |                              |       |
| <i>Mad2l1bp</i> | Mad2l1bp      |         |         |                              |       |
| <i>Mad2l2</i>   | Mad2l2        |         |         |                              |       |
| <i>Maea</i>     |               |         | Maea    |                              |       |
| <i>Maf</i>      |               |         | Maf     |                              |       |
| <i>Mafk</i>     | Mafk          |         |         |                              |       |
| <i>Magea2</i>   | Magea2        |         |         |                              |       |
| <i>Magea4</i>   |               | Magea4  |         |                              |       |
| <i>Mageb16</i>  | Mageb16       |         |         |                              |       |
| <i>Mageb18</i>  |               |         | Mageb18 |                              |       |
| <i>Mageb3</i>   |               | Mageb3  |         |                              |       |
| <i>Magee1</i>   |               |         | Magee1  |                              |       |
| <i>Magee2</i>   |               |         | Magee2  |                              |       |
| <i>Magi1</i>    |               | Magi1   |         |                              |       |
| <i>Magoh</i>    |               |         | Magoh   |                              |       |
| <i>Magohb</i>   |               | Magohb  |         |                              |       |
| <i>Magt1</i>    |               |         | Magt1   |                              | Magt1 |
| <i>Mak</i>      | Mak           | Mak     | Mak     |                              |       |
| <i>Mal</i>      |               |         | Mal     |                              |       |
| <i>Malat1</i>   |               |         | Malat1  |                              |       |
| <i>Malsu1</i>   |               |         | Malsu1  |                              |       |
| <i>Malt1</i>    | Malt1         | Malt1   | Malt1   |                              |       |
| <i>Mamdc2</i>   |               |         | Mamdc2  |                              |       |
| <i>Mamdc4</i>   |               |         | Mamdc4  |                              |       |
| <i>Maml3</i>    |               |         | Maml3   |                              |       |
| <i>Maml1</i>    |               | Maml1   |         |                              |       |
| <i>Mamstr</i>   |               | Mamstr  |         |                              |       |
| <i>Man1b1</i>   |               | Man1b1  | Man1b1  |                              |       |
| <i>Man2a1</i>   | Man2a1        | Man2a1  | Man2a1  |                              |       |
| <i>Man2a2</i>   |               | Man2a2  | Man2a2  |                              |       |
| <i>Man2b1</i>   |               |         | Man2b1  |                              |       |
| <i>Man2b2</i>   |               | Man2b2  |         |                              |       |
| <i>Man2c1</i>   |               |         | Man2c1  |                              |       |
| <i>Manba</i>    |               |         | Manba   |                              |       |
| <i>Manea</i>    |               | Manea   |         |                              |       |

Suppl. Table 1  
(110/234)

|                  | CHIP-Seq hits |          |           | Unique hits with interactors |        |
|------------------|---------------|----------|-----------|------------------------------|--------|
|                  | unstimulated  | Ac       | LPS       | Ac                           | LPS    |
| <i>Mannr</i>     |               | Mannr    |           |                              |        |
| <i>Mansc1</i>    | Mansc1        |          |           |                              |        |
| <i>Map10</i>     |               | Map10    |           |                              |        |
| <i>Map1a</i>     |               | Map1a    |           | Map1a                        |        |
| <i>Map1b</i>     | Map1b         |          |           |                              |        |
| <i>Map1lc3a</i>  | Map1lc3a      |          | Map1lc3a  |                              |        |
| <i>Map1lc3b</i>  |               | Map1lc3b | Map1lc3b  |                              |        |
| <i>Map2k3os</i>  |               | Map2k3os |           |                              |        |
| <i>Map2k5</i>    | Map2k5        | Map2k5   |           |                              |        |
| <i>Map2k6</i>    | Map2k6        |          |           |                              |        |
| <i>Map2k7</i>    | Map2k7        |          | Map2k7    |                              |        |
| <i>Map3k12</i>   |               | Map3k12  | Map3k12   |                              |        |
| <i>Map3k15</i>   | Map3k15       |          | Map3k15   |                              |        |
| <i>Map3k6</i>    | Map3k6        |          |           |                              |        |
| <i>Map3k7</i>    |               | Map3k7   |           | Map3k7                       |        |
| <i>Map3k7cl</i>  | Map3k7cl      |          | Map3k7cl  |                              |        |
| <i>Map3k8</i>    |               | Map3k8   | Map3k8    |                              |        |
| <i>Map3k9</i>    |               | Map3k9   |           |                              |        |
| <i>Map4</i>      | Map4          |          |           |                              |        |
| <i>Map4k1</i>    |               | Map4k1   | Map4k1    |                              |        |
| <i>Map4k2</i>    |               | Map4k2   |           |                              |        |
| <i>Map4k3</i>    |               |          | Map4k3    |                              | Map4k3 |
| <i>Map6</i>      | Map6          |          |           |                              |        |
| <i>Map7</i>      |               | Map7     |           |                              |        |
| <i>Map7d1</i>    |               |          | Map7d1    |                              | Map7d1 |
| <i>Mapk10</i>    |               | Mapk10   |           |                              |        |
| <i>Mapk13</i>    | Mapk13        | Mapk13   | Mapk13    |                              |        |
| <i>Mapk1ip1</i>  |               |          | Mapk1ip1  |                              |        |
| <i>Mapk1ip1l</i> |               |          | Mapk1ip1l |                              |        |
| <i>Mapk6</i>     |               | Mapk6    | Mapk6     |                              |        |
| <i>Mapk8</i>     | Mapk8         | Mapk8    | Mapk8     |                              |        |
| <i>Mapk8ip3</i>  |               | Mapk8ip3 | Mapk8ip3  |                              |        |
| <i>Mapk9</i>     |               | Mapk9    |           |                              |        |
| <i>Mapkap1</i>   | Mapkap1       | Mapkap1  | Mapkap1   |                              |        |
| <i>Mapkapk2</i>  |               | Mapkapk2 |           | Mapkapk2                     |        |
| <i>Mapkbp1</i>   |               | Mapkbp1  | Mapkbp1   |                              |        |
| <i>Mapre2</i>    |               |          | Mapre2    |                              |        |
| <i>Mapt</i>      |               | Mapt     |           |                              |        |
| <i>March10</i>   |               |          | March10   |                              |        |
| <i>March2</i>    | March2        | March2   | March2    |                              |        |
| <i>March5</i>    | March5        | March5   | March5    |                              |        |
| <i>March6</i>    |               |          | March6    |                              | March6 |
| <i>March7</i>    | March7        |          |           |                              |        |
| <i>March8</i>    |               | March8   | March8    |                              |        |
| <i>March9</i>    | March9        | March9   |           |                              |        |
| <i>Marcksl1</i>  | Marcksl1      | Marcksl1 | Marcksl1  |                              |        |
| <i>Marf1</i>     | Marf1         |          | Marf1     |                              |        |
| <i>Mark4</i>     |               |          | Mark4     |                              |        |
| <i>Mars</i>      | Mars          |          | Mars      |                              |        |

Suppl. Table 1  
(111/234)

|                 | CHIP-Seq hits   |                 |                 | Unique hits with interactors |               |
|-----------------|-----------------|-----------------|-----------------|------------------------------|---------------|
|                 | unstimulated    | Ac              | LPS             | Ac                           | LPS           |
| <i>Mars2</i>    |                 |                 | <i>Mars2</i>    |                              | <i>Mars2</i>  |
| <i>Marveld1</i> | <i>Marveld1</i> |                 | <i>Marveld1</i> |                              |               |
| <i>Marveld2</i> |                 | <i>Marveld2</i> |                 |                              |               |
| <i>Marveld3</i> | <i>Marveld3</i> |                 |                 |                              |               |
| <i>Masp1</i>    | <i>Masp1</i>    | <i>Masp1</i>    |                 |                              |               |
| <i>Masp2</i>    |                 | <i>Masp2</i>    |                 |                              |               |
| <i>Mast1</i>    |                 |                 | <i>Mast1</i>    |                              |               |
| <i>Mat2a</i>    |                 | <i>Mat2a</i>    |                 |                              |               |
| <i>Mat2b</i>    | <i>Mat2b</i>    |                 | <i>Mat2b</i>    |                              |               |
| <i>Matk</i>     | <i>Matk</i>     |                 | <i>Matk</i>     |                              |               |
| <i>Matn3</i>    | <i>Matn3</i>    |                 | <i>Matn3</i>    |                              |               |
| <i>Mau2</i>     |                 | <i>Mau2</i>     | <i>Mau2</i>     |                              |               |
| <i>Mavs</i>     | <i>Mavs</i>     |                 | <i>Mavs</i>     |                              |               |
| <i>Mb21d2</i>   |                 | <i>Mb21d2</i>   | <i>Mb21d2</i>   |                              |               |
| <i>Mbd3l2</i>   |                 | <i>Mbd3l2</i>   | <i>Mbd3l2</i>   |                              |               |
| <i>Mbd4</i>     |                 | <i>Mbd4</i>     | <i>Mbd4</i>     |                              |               |
| <i>Mbl1</i>     |                 | <i>Mbl1</i>     |                 |                              |               |
| <i>Mbnl1</i>    | <i>Mbnl1</i>    | <i>Mbnl1</i>    | <i>Mbnl1</i>    |                              |               |
| <i>Mbnl3</i>    |                 | <i>Mbnl3</i>    | <i>Mbnl3</i>    |                              |               |
| <i>Mboat4</i>   |                 |                 | <i>Mboat4</i>   |                              |               |
| <i>Mbp</i>      |                 | <i>Mbp</i>      | <i>Mbp</i>      |                              |               |
| <i>Mbtd1</i>    |                 |                 | <i>Mbtd1</i>    |                              |               |
| <i>Mbtps2</i>   |                 |                 | <i>Mbtps2</i>   |                              | <i>Mbtps2</i> |
| <i>Mccc1</i>    |                 | <i>Mccc1</i>    | <i>Mccc1</i>    |                              |               |
| <i>Mccc1os</i>  |                 | <i>Mccc1os</i>  |                 |                              |               |
| <i>Mcemp1</i>   |                 |                 | <i>Mcemp1</i>   |                              |               |
| <i>Mcfd2</i>    |                 | <i>Mcfd2</i>    |                 |                              |               |
| <i>Mchr1</i>    |                 |                 | <i>Mchr1</i>    |                              |               |
| <i>Mcl1</i>     |                 | <i>Mcl1</i>     |                 | <i>Mcl1</i>                  |               |
| <i>Mcm10</i>    |                 | <i>Mcm10</i>    | <i>Mcm10</i>    |                              |               |
| <i>Mcm2</i>     |                 | <i>Mcm2</i>     | <i>Mcm2</i>     |                              |               |
| <i>Mcm3</i>     |                 | <i>Mcm3</i>     | <i>Mcm3</i>     |                              |               |
| <i>Mcm3ap</i>   |                 |                 | <i>Mcm3ap</i>   |                              | <i>Mcm3ap</i> |
| <i>Mcm4</i>     | <i>Mcm4</i>     |                 | <i>Mcm4</i>     |                              |               |
| <i>Mcm5</i>     |                 |                 | <i>Mcm5</i>     |                              | <i>Mcm5</i>   |
| <i>Mcm6</i>     | <i>Mcm6</i>     |                 | <i>Mcm6</i>     |                              |               |
| <i>Mcm8</i>     |                 | <i>Mcm8</i>     | <i>Mcm8</i>     |                              |               |
| <i>Mcm9</i>     |                 |                 | <i>Mcm9</i>     |                              |               |
| <i>Mcmbp</i>    |                 | <i>Mcmbp</i>    |                 |                              |               |
| <i>Mcmdc2</i>   |                 | <i>Mcmdc2</i>   |                 | <i>Mcmdc2</i>                |               |
| <i>Mcoln2</i>   |                 | <i>Mcoln2</i>   |                 |                              |               |
| <i>Mcoln3</i>   |                 | <i>Mcoln3</i>   | <i>Mcoln3</i>   |                              |               |
| <i>Mcph1</i>    | <i>Mcph1</i>    | <i>Mcph1</i>    | <i>Mcph1</i>    |                              |               |
| <i>Mcpt1</i>    | <i>Mcpt1</i>    | <i>Mcpt1</i>    |                 |                              |               |
| <i>Mcpt2</i>    |                 | <i>Mcpt2</i>    | <i>Mcpt2</i>    |                              |               |
| <i>Mcpt8</i>    | <i>Mcpt8</i>    |                 |                 |                              |               |
| <i>Mcrs1</i>    |                 | <i>Mcrs1</i>    |                 |                              |               |
| <i>Mctp2</i>    |                 | <i>Mctp2</i>    | <i>Mctp2</i>    |                              |               |
| <i>Mcts2</i>    |                 |                 | <i>Mcts2</i>    |                              |               |

Suppl. Table 1  
(112/234)

|               | ChIP-Seq hits |        |        | Unique hits with interactors |        |
|---------------|---------------|--------|--------|------------------------------|--------|
|               | unstimulated  | Ac     | LPS    | Ac                           | LPS    |
| <i>Mcu</i>    |               | Mcu    |        |                              |        |
| <i>Mcur1</i>  |               |        | Mcur1  |                              |        |
| <i>Mdc1</i>   |               | Mdc1   |        | Mdc1                         |        |
| <i>Mdk</i>    |               |        | Mdk    |                              | Mdk    |
| <i>Mdm1</i>   |               |        | Mdm1   |                              |        |
| <i>Mdm2</i>   | Mdm2          |        | Mdm2   |                              |        |
| <i>Mdm4</i>   |               | Mdm4   | Mdm4   |                              |        |
| <i>Mdn1</i>   |               |        | Mdn1   |                              |        |
| <i>Mdp1</i>   |               | Mdp1   |        |                              |        |
| <i>Me1</i>    | Me1           |        |        |                              |        |
| <i>Me2</i>    |               |        | Me2    |                              |        |
| <i>Me3</i>    |               | Me3    |        |                              |        |
| <i>Mea1</i>   |               | Mea1   | Mea1   |                              |        |
| <i>Meaf6</i>  |               |        | Meaf6  |                              |        |
| <i>Mecom</i>  |               |        | Mecom  |                              | Mecom  |
| <i>Mecp2</i>  |               | Mecp2  |        | Mecp2                        |        |
| <i>Mecr</i>   |               | Mecr   |        |                              |        |
| <i>Med1</i>   |               | Med1   |        |                              |        |
| <i>Med12</i>  |               | Med12  |        |                              |        |
| <i>Med13l</i> |               | Med13l |        |                              |        |
| <i>Med14</i>  | Med14         | Med14  | Med14  |                              |        |
| <i>Med15</i>  | Med15         | Med15  | Med15  |                              |        |
| <i>Med18</i>  | Med18         | Med18  | Med18  |                              |        |
| <i>Med19</i>  | Med19         |        |        |                              |        |
| <i>Med22</i>  |               | Med22  | Med22  |                              |        |
| <i>Med23</i>  | Med23         |        |        |                              |        |
| <i>Med24</i>  |               | Med24  | Med24  |                              |        |
| <i>Med25</i>  |               |        | Med25  |                              |        |
| <i>Med26</i>  |               | Med26  |        |                              |        |
| <i>Med29</i>  |               | Med29  | Med29  |                              |        |
| <i>Med9</i>   |               |        | Med9   |                              |        |
| <i>Medag</i>  |               | Medag  |        | Medag                        |        |
| <i>Mef2a</i>  | Mef2a         | Mef2a  | Mef2a  |                              |        |
| <i>Mef2d</i>  |               | Mef2d  | Mef2d  |                              |        |
| <i>Megf9</i>  |               |        | Megf9  |                              | Megf9  |
| <i>Meig1</i>  |               | Meig1  | Meig1  |                              |        |
| <i>Meikin</i> |               |        | Meikin |                              |        |
| <i>Meiob</i>  |               | Meiob  |        |                              |        |
| <i>Meis3</i>  |               |        | Meis3  |                              |        |
| <i>Melk</i>   |               | Melk   | Melk   |                              |        |
| <i>Memo1</i>  |               | Memo1  |        |                              |        |
| <i>Meox1</i>  |               |        | Meox1  |                              | Meox1  |
| <i>Mep1a</i>  |               | Mep1a  |        |                              |        |
| <i>Mepe</i>   |               | Mepe   |        | Mepe                         |        |
| <i>Mertk</i>  |               |        | Mertk  |                              | Mertk  |
| <i>Mesdc1</i> | Mesdc1        |        |        |                              |        |
| <i>Mesdc2</i> |               |        | Mesdc2 |                              | Mesdc2 |
| <i>Mesp2</i>  |               |        | Mesp2  |                              |        |
| <i>Mest</i>   | Mest          |        | Mest   |                              |        |



Suppl. Table 1  
(113/234)

|                 | CHIP-Seq hits |          |          | Unique hits with interactors |        |
|-----------------|---------------|----------|----------|------------------------------|--------|
|                 | unstimulated  | Ac       | LPS      | Ac                           | LPS    |
| <i>Metap1</i>   | Metap1        | Metap1   |          |                              |        |
| <i>Metap2</i>   |               | Metap2   | Metap2   |                              |        |
| <i>Methig1</i>  |               | Methig1  | Methig1  |                              |        |
| <i>Metrn</i>    |               |          | Metrn    |                              |        |
| <i>Metrn1</i>   |               |          | Metrn1   |                              |        |
| <i>Mettl13</i>  |               | Mettl13  |          |                              |        |
| <i>Mettl14</i>  |               | Mettl14  | Mettl14  |                              |        |
| <i>Mettl15</i>  |               |          | Mettl15  |                              |        |
| <i>Mettl16</i>  | Mettl16       | Mettl16  |          |                              |        |
| <i>Mettl17</i>  |               | Mettl17  |          |                              |        |
| <i>Mettl18</i>  |               |          | Mettl18  |                              |        |
| <i>Mettl20</i>  |               | Mettl20  | Mettl20  |                              |        |
| <i>Mettl21e</i> | Mettl21e      |          |          |                              |        |
| <i>Mettl22</i>  |               | Mettl22  | Mettl22  |                              |        |
| <i>Mettl25</i>  |               |          | Mettl25  |                              |        |
| <i>Mettl5</i>   |               |          | Mettl5   |                              | Mettl5 |
| <i>Mettl7a1</i> |               | Mettl7a1 | Mettl7a1 |                              |        |
| <i>Mettl7a2</i> |               | Mettl7a2 | Mettl7a2 |                              |        |
| <i>Mettl7a3</i> | Mettl7a3      | Mettl7a3 | Mettl7a3 |                              |        |
| <i>Mettl8</i>   |               | Mettl8   |          |                              |        |
| <i>Mettl9</i>   |               |          | Mettl9   |                              |        |
| <i>Mex3b</i>    | Mex3b         |          |          |                              |        |
| <i>Mex3d</i>    |               |          | Mex3d    |                              |        |
| <i>Mfap1a</i>   |               |          | Mfap1a   |                              | Mfap1a |
| <i>Mfap1b</i>   | Mfap1b        |          | Mfap1b   |                              |        |
| <i>Mfap3</i>    |               | Mfap3    |          |                              |        |
| <i>Mfap3l</i>   |               | Mfap3l   | Mfap3l   |                              |        |
| <i>Mfhas1</i>   |               |          | Mfhas1   |                              |        |
| <i>Mfi2</i>     |               | Mfi2     |          |                              |        |
| <i>Mfn1</i>     |               | Mfn1     | Mfn1     |                              |        |
| <i>Mfn2</i>     |               | Mfn2     | Mfn2     |                              |        |
| <i>Mfng</i>     |               | Mfng     |          |                              |        |
| <i>Mfsd12</i>   |               |          | Mfsd12   |                              |        |
| <i>Mfsd3</i>    |               | Mfsd3    |          |                              |        |
| <i>Mfsd5</i>    |               |          | Mfsd5    |                              |        |
| <i>Mfsd6l</i>   |               | Mfsd6l   |          |                              |        |
| <i>Mfsd7b</i>   |               |          | Mfsd7b   |                              | Mfsd7b |
| <i>Mfsd7c</i>   | Mfsd7c        | Mfsd7c   | Mfsd7c   |                              |        |
| <i>Mfsd9</i>    | Mfsd9         | Mfsd9    |          |                              |        |
| <i>Mgat1</i>    |               | Mgat1    | Mgat1    |                              |        |
| <i>Mgat2</i>    |               | Mgat2    | Mgat2    |                              |        |
| <i>Mgat4a</i>   |               | Mgat4a   | Mgat4a   |                              |        |
| <i>Mgat4c</i>   |               |          | Mgat4c   |                              |        |
| <i>Mgat4e</i>   |               | Mgat4e   | Mgat4e   |                              |        |
| <i>Mgat5</i>    | Mgat5         |          |          |                              |        |
| <i>Mgat5b</i>   |               |          | Mgat5b   |                              | Mgat5b |
| <i>Mgl2</i>     |               | Mgl2     |          |                              |        |
| <i>Mgme1</i>    | Mgme1         |          |          |                              |        |
| <i>Mgp</i>      | Mgp           | Mgp      |          |                              |        |

Suppl. Table 1  
(114/234)

|                  | ChIP-Seq hits |           |           | Unique hits with interactors |           |
|------------------|---------------|-----------|-----------|------------------------------|-----------|
|                  | unstimulated  | Ac        | LPS       | Ac                           | LPS       |
| <i>Mgrn1</i>     |               |           | Mgrn1     |                              |           |
| <i>Mgst1</i>     |               | Mgst1     | Mgst1     |                              |           |
| <i>Mgst2</i>     |               |           | Mgst2     |                              |           |
| <i>Mia</i>       |               | Mia       | Mia       |                              |           |
| <i>Mia2</i>      |               |           | Mia2      |                              |           |
| <i>Mical1</i>    |               | Mical1    |           |                              |           |
| <i>Mical3</i>    |               | Mical3    | Mical3    |                              |           |
| <i>Micu1</i>     |               | Micu1     | Micu1     |                              |           |
| <i>Micu2</i>     |               | Micu2     |           |                              |           |
| <i>Micu3</i>     |               | Micu3     |           |                              |           |
| <i>Mid1ip1</i>   |               | Mid1ip1   |           |                              |           |
| <i>Mid2</i>      |               | Mid2      |           |                              |           |
| <i>Mief1</i>     | Mief1         | Mief1     | Mief1     |                              |           |
| <i>Mief2</i>     |               | Mief2     |           |                              |           |
| <i>Mien1</i>     | Mien1         | Mien1     | Mien1     |                              |           |
| <i>Mier1</i>     |               |           | Mier1     |                              |           |
| <i>Mier2</i>     | Mier2         |           | Mier2     |                              |           |
| <i>Mif</i>       | Mif           |           |           |                              |           |
| <i>Mill1</i>     | Mill1         |           |           |                              |           |
| <i>Mill2</i>     | Mill2         | Mill2     | Mill2     |                              |           |
| <i>Milr1</i>     | Milr1         | Milr1     |           |                              |           |
| <i>Mina</i>      | Mina          |           |           |                              |           |
| <i>Mink1</i>     |               | Mink1     | Mink1     |                              |           |
| <i>Mios</i>      |               | Mios      |           |                              |           |
| <i>Mir100</i>    |               | Mir100    |           | Mir100                       |           |
| <i>Mir101a</i>   |               | Mir101a   |           | Mir101a                      |           |
| <i>Mir103-1</i>  |               | Mir103-1  |           |                              |           |
| <i>Mir103-2</i>  | Mir103-2      |           | Mir103-2  |                              |           |
| <i>Mir106a</i>   |               | Mir106a   |           | Mir106a                      |           |
| <i>Mir10b</i>    |               |           | Mir10b    |                              | Mir10b    |
| <i>Mir1188</i>   |               |           | Mir1188   |                              | Mir1188   |
| <i>Mir1191</i>   | Mir1191       | Mir1191   | Mir1191   |                              |           |
| <i>Mir1191b</i>  | Mir1191b      |           |           |                              |           |
| <i>Mir1195</i>   |               |           | Mir1195   |                              | Mir1195   |
| <i>Mir1198</i>   |               |           | Mir1198   |                              | Mir1198   |
| <i>Mir1199</i>   |               |           | Mir1199   |                              | Mir1199   |
| <i>Mir1231</i>   |               |           | Mir1231   |                              |           |
| <i>Mir124a-1</i> |               | Mir124a-1 | Mir124a-1 |                              |           |
| <i>Mir124a-3</i> |               | Mir124a-3 | Mir124a-3 |                              |           |
| <i>Mir1251</i>   |               |           | Mir1251   |                              | Mir1251   |
| <i>Mir1258</i>   |               | Mir1258   |           |                              |           |
| <i>Mir125b-1</i> | Mir125b-1     | Mir125b-1 | Mir125b-1 |                              |           |
| <i>Mir125b-2</i> |               |           | Mir125b-2 |                              | Mir125b-2 |
| <i>Mir1264</i>   |               |           | Mir1264   |                              | Mir1264   |
| <i>Mir126b</i>   |               | Mir126b   |           |                              |           |
| <i>Mir128-1</i>  |               |           | Mir128-1  |                              |           |
| <i>Mir129-2</i>  | Mir129-2      |           | Mir129-2  |                              |           |
| <i>Mir129b</i>   |               |           | Mir129b   |                              |           |
| <i>Mir130a</i>   |               | Mir130a   |           | Mir130a                      |           |

Suppl. Table 1  
(115/234)

|                  | ChIP-Seq hits |           |           | Unique hits with interactors |           |
|------------------|---------------|-----------|-----------|------------------------------|-----------|
|                  | unstimulated  | Ac        | LPS       | Ac                           | LPS       |
| <i>Mir130c</i>   |               |           | Mir130c   |                              |           |
| <i>Mir133a-2</i> |               | Mir133a-2 |           | Mir133a-2                    |           |
| <i>Mir135a-1</i> |               |           | Mir135a-1 |                              |           |
| <i>Mir135a-2</i> |               |           | Mir135a-2 |                              | Mir135a-2 |
| <i>Mir136</i>    | Mir136        |           |           |                              |           |
| <i>Mir142</i>    |               |           | Mir142    |                              | Mir142    |
| <i>Mir142b</i>   |               | Mir142b   |           |                              |           |
| <i>Mir145a</i>   |               | Mir145a   |           | Mir145a                      |           |
| <i>Mir146</i>    |               | Mir146    | Mir146    |                              |           |
| <i>Mir146b</i>   | Mir146b       | Mir146b   | Mir146b   |                              |           |
| <i>Mir148a</i>   |               |           | Mir148a   |                              | Mir148a   |
| <i>Mir151</i>    | Mir151        |           |           |                              |           |
| <i>Mir154</i>    | Mir154        |           | Mir154    |                              |           |
| <i>Mir15a</i>    |               | Mir15a    |           | Mir15a                       |           |
| <i>Mir16-1</i>   |               | Mir16-1   |           |                              |           |
| <i>Mir17</i>     |               |           | Mir17     |                              | Mir17     |
| <i>Mir17hg</i>   |               |           | Mir17hg   |                              |           |
| <i>Mir18</i>     |               |           | Mir18     |                              | Mir18     |
| <i>Mir181a-2</i> |               | Mir181a-2 |           |                              |           |
| <i>Mir181b-2</i> |               | Mir181b-2 |           | Mir181b-2                    |           |
| <i>Mir182</i>    |               |           | Mir182    |                              |           |
| <i>Mir1843a</i>  |               | Mir1843a  | Mir1843a  |                              |           |
| <i>Mir185</i>    | Mir185        | Mir185    |           |                              |           |
| <i>Mir186</i>    |               |           | Mir186    |                              | Mir186    |
| <i>Mir187</i>    |               | Mir187    |           | Mir187                       |           |
| <i>Mir1894</i>   |               | Mir1894   |           | Mir1894                      |           |
| <i>Mir1896</i>   |               | Mir1896   | Mir1896   |                              |           |
| <i>Mir1899</i>   |               | Mir1899   | Mir1899   |                              |           |
| <i>Mir18b</i>    |               | Mir18b    |           | Mir18b                       |           |
| <i>Mir1900</i>   | Mir1900       |           | Mir1900   |                              |           |
| <i>Mir1902</i>   | Mir1902       |           | Mir1902   |                              |           |
| <i>Mir1903</i>   |               | Mir1903   |           | Mir1903                      |           |
| <i>Mir1906-1</i> | Mir1906-1     |           |           |                              |           |
| <i>Mir1906-2</i> | Mir1906-2     |           |           |                              |           |
| <i>Mir1907</i>   | Mir1907       | Mir1907   | Mir1907   |                              |           |
| <i>Mir190b</i>   |               | Mir190b   |           |                              |           |
| <i>Mir1912</i>   |               |           | Mir1912   |                              | Mir1912   |
| <i>Mir1927</i>   |               | Mir1927   |           | Mir1927                      |           |
| <i>Mir1928</i>   |               | Mir1928   |           | Mir1928                      |           |
| <i>Mir1932</i>   |               |           | Mir1932   |                              |           |
| <i>Mir1933</i>   | Mir1933       |           | Mir1933   |                              |           |
| <i>Mir1934</i>   |               |           | Mir1934   |                              | Mir1934   |
| <i>Mir1936</i>   | Mir1936       |           | Mir1936   |                              |           |
| <i>Mir194-1</i>  |               | Mir194-1  | Mir194-1  |                              |           |
| <i>Mir1943</i>   |               |           | Mir1943   |                              | Mir1943   |
| <i>Mir1945</i>   | Mir1945       |           |           |                              |           |
| <i>Mir1947</i>   |               | Mir1947   | Mir1947   |                              |           |
| <i>Mir1949</i>   |               |           | Mir1949   |                              |           |
| <i>Mir1952</i>   |               | Mir1952   |           | Mir1952                      |           |

Suppl. Table 1  
(116/234)

|                  | CHIP-Seq hits |           |           | Unique hits with interactors |           |
|------------------|---------------|-----------|-----------|------------------------------|-----------|
|                  | unstimulated  | Ac        | LPS       | Ac                           | LPS       |
| <i>Mir1954</i>   |               | Mir1954   |           | Mir1954                      |           |
| <i>Mir1955</i>   | Mir1955       |           | Mir1955   |                              |           |
| <i>Mir1957a</i>  | Mir1957a      | Mir1957a  |           |                              |           |
| <i>Mir195a</i>   | Mir195a       |           |           |                              |           |
| <i>Mir195b</i>   | Mir195b       |           |           |                              |           |
| <i>Mir1960</i>   |               | Mir1960   | Mir1960   |                              |           |
| <i>Mir1961</i>   | Mir1961       |           |           |                              |           |
| <i>Mir1963</i>   |               |           | Mir1963   |                              |           |
| <i>Mir196a-1</i> |               | Mir196a-1 |           |                              |           |
| <i>Mir1970</i>   |               | Mir1970   |           | Mir1970                      |           |
| <i>Mir1981</i>   |               | Mir1981   |           | Mir1981                      |           |
| <i>Mir199a-1</i> |               | Mir199a-1 |           |                              |           |
| <i>Mir199b</i>   |               | Mir199b   |           | Mir199b                      |           |
| <i>Mir19a</i>    |               |           | Mir19a    |                              | Mir19a    |
| <i>Mir19b-1</i>  |               |           | Mir19b-1  |                              | Mir19b-1  |
| <i>Mir19b-2</i>  |               | Mir19b-2  |           |                              |           |
| <i>Mir200a</i>   |               | Mir200a   |           | Mir200a                      |           |
| <i>Mir200b</i>   |               | Mir200b   |           | Mir200b                      |           |
| <i>Mir205</i>    |               | Mir205    |           | Mir205                       |           |
| <i>Mir206</i>    | Mir206        |           | Mir206    |                              |           |
| <i>Mir208a</i>   |               | Mir208a   |           | Mir208a                      |           |
| <i>Mir208b</i>   | Mir208b       | Mir208b   | Mir208b   |                              |           |
| <i>Mir20a</i>    |               |           | Mir20a    |                              | Mir20a    |
| <i>Mir20b</i>    |               | Mir20b    |           | Mir20b                       |           |
| <i>Mir211</i>    | Mir211        |           | Mir211    |                              |           |
| <i>Mir2136</i>   |               | Mir2136   |           | Mir2136                      |           |
| <i>Mir214</i>    |               |           | Mir214    |                              | Mir214    |
| <i>Mir215</i>    |               | Mir215    | Mir215    |                              |           |
| <i>Mir216a</i>   | Mir216a       |           | Mir216a   |                              |           |
| <i>Mir216c</i>   |               | Mir216c   |           |                              |           |
| <i>Mir217</i>    |               |           | Mir217    |                              | Mir217    |
| <i>Mir218-1</i>  |               | Mir218-1  |           |                              |           |
| <i>Mir218-2</i>  |               | Mir218-2  | Mir218-2  |                              |           |
| <i>Mir219b</i>   | Mir219b       |           |           |                              |           |
| <i>Mir21a</i>    |               |           | Mir21a    |                              | Mir21a    |
| <i>Mir21c</i>    |               | Mir21c    |           |                              |           |
| <i>Mir23a</i>    |               | Mir23a    | Mir23a    |                              |           |
| <i>Mir23b</i>    |               |           | Mir23b    |                              | Mir23b    |
| <i>Mir24-1</i>   |               |           | Mir24-1   |                              |           |
| <i>Mir24-2</i>   |               | Mir24-2   | Mir24-2   |                              |           |
| <i>Mir26a-2</i>  | Mir26a-2      | Mir26a-2  |           |                              |           |
| <i>Mir27a</i>    |               | Mir27a    | Mir27a    |                              |           |
| <i>Mir27b</i>    |               |           | Mir27b    |                              | Mir27b    |
| <i>Mir2861</i>   |               |           | Mir2861   |                              | Mir2861   |
| <i>Mir28c</i>    | Mir28c        |           |           |                              |           |
| <i>Mir296</i>    |               | Mir296    |           | Mir296                       |           |
| <i>Mir297-1</i>  |               |           | Mir297-1  |                              |           |
| <i>Mir297a-2</i> |               |           | Mir297a-2 |                              |           |
| <i>Mir297a-4</i> |               |           | Mir297a-4 |                              | Mir297a-4 |

Suppl. Table 1  
(117/234)

|                  | ChIP-Seq hits |           |           | Unique hits with interactors |           |
|------------------|---------------|-----------|-----------|------------------------------|-----------|
|                  | unstimulated  | Ac        | LPS       | Ac                           | LPS       |
| <i>Mir300</i>    |               |           | Mir300    |                              | Mir300    |
| <i>Mir302a</i>   |               | Mir302a   |           | Mir302a                      |           |
| <i>Mir302b</i>   |               | Mir302b   | Mir302b   |                              |           |
| <i>Mir302c</i>   |               | Mir302c   | Mir302c   |                              |           |
| <i>Mir302d</i>   |               | Mir302d   |           | Mir302d                      |           |
| <i>Mir3058</i>   | Mir3058       | Mir3058   | Mir3058   |                              |           |
| <i>Mir3061</i>   |               |           | Mir3061   |                              | Mir3061   |
| <i>Mir3062</i>   |               | Mir3062   |           | Mir3062                      |           |
| <i>Mir3063</i>   |               |           | Mir3063   |                              | Mir3063   |
| <i>Mir3064</i>   |               | Mir3064   | Mir3064   |                              |           |
| <i>Mir3065</i>   | Mir3065       |           |           |                              |           |
| <i>Mir3067</i>   |               |           | Mir3067   |                              | Mir3067   |
| <i>Mir3068</i>   |               |           | Mir3068   |                              |           |
| <i>Mir3072</i>   | Mir3072       | Mir3072   | Mir3072   |                              |           |
| <i>Mir3073a</i>  |               | Mir3073a  |           | Mir3073a                     |           |
| <i>Mir3073b</i>  | Mir3073b      |           |           |                              |           |
| <i>Mir3074-1</i> |               |           | Mir3074-1 |                              | Mir3074-1 |
| <i>Mir3075</i>   |               | Mir3075   |           | Mir3075                      |           |
| <i>Mir3076</i>   | Mir3076       | Mir3076   | Mir3076   |                              |           |
| <i>Mir3077</i>   |               | Mir3077   |           | Mir3077                      |           |
| <i>Mir3078</i>   |               | Mir3078   | Mir3078   |                              |           |
| <i>Mir3081</i>   | Mir3081       |           |           |                              |           |
| <i>Mir3084-1</i> | Mir3084-1     | Mir3084-1 | Mir3084-1 |                              |           |
| <i>Mir3086</i>   |               |           | Mir3086   |                              | Mir3086   |
| <i>Mir3089</i>   |               | Mir3089   |           | Mir3089                      |           |
| <i>Mir3091</i>   |               | Mir3091   | Mir3091   |                              |           |
| <i>Mir3092</i>   |               |           | Mir3092   |                              | Mir3092   |
| <i>Mir3094</i>   | Mir3094       |           |           |                              |           |
| <i>Mir3095</i>   |               | Mir3095   |           | Mir3095                      |           |
| <i>Mir3098</i>   | Mir3098       |           |           |                              |           |
| <i>Mir3099</i>   |               |           | Mir3099   |                              | Mir3099   |
| <i>Mir30a</i>    |               |           | Mir30a    |                              | Mir30a    |
| <i>Mir30b</i>    |               | Mir30b    | Mir30b    |                              |           |
| <i>Mir30c-2</i>  |               |           | Mir30c-2  |                              | Mir30c-2  |
| <i>Mir30d</i>    |               |           | Mir30d    |                              | Mir30d    |
| <i>Mir30e</i>    | Mir30e        |           |           |                              |           |
| <i>Mir31</i>     |               | Mir31     |           | Mir31                        |           |
| <i>Mir3101</i>   |               | Mir3101   | Mir3101   |                              |           |
| <i>Mir3102</i>   |               | Mir3102   |           | Mir3102                      |           |
| <i>Mir3103</i>   |               |           | Mir3103   |                              | Mir3103   |
| <i>Mir3109</i>   | Mir3109       |           |           |                              |           |
| <i>Mir3110</i>   | Mir3110       |           |           |                              |           |
| <i>Mir3112</i>   | Mir3112       |           |           |                              |           |
| <i>Mir3113</i>   |               | Mir3113   |           | Mir3113                      |           |
| <i>Mir320</i>    |               | Mir320    |           | Mir320                       |           |
| <i>Mir327</i>    | Mir327        |           |           |                              |           |
| <i>Mir328</i>    |               |           | Mir328    |                              | Mir328    |
| <i>Mir330</i>    | Mir330        |           |           |                              |           |
| <i>Mir331</i>    |               |           | Mir331    |                              | Mir331    |

Suppl. Table 1  
(118/234)

|                  | CHIP-Seq hits |           |           | Unique hits with interactors |          |
|------------------|---------------|-----------|-----------|------------------------------|----------|
|                  | unstimulated  | Ac        | LPS       | Ac                           | LPS      |
| <i>Mir337</i>    |               |           | Mir337    |                              | Mir337   |
| <i>Mir341</i>    |               |           | Mir341    |                              |          |
| <i>Mir343</i>    |               | Mir343    |           | Mir343                       |          |
| <i>Mir344</i>    | Mir344        |           |           |                              |          |
| <i>Mir344c</i>   |               | Mir344c   | Mir344c   |                              |          |
| <i>Mir344d-1</i> | Mir344d-1     | Mir344d-1 |           |                              |          |
| <i>Mir344d-2</i> | Mir344d-2     | Mir344d-2 |           |                              |          |
| <i>Mir344f</i>   |               | Mir344f   |           | Mir344f                      |          |
| <i>Mir344i</i>   |               | Mir344i   |           |                              |          |
| <i>Mir345</i>    |               | Mir345    |           | Mir345                       |          |
| <i>Mir346</i>    |               | Mir346    |           | Mir346                       |          |
| <i>Mir3470a</i>  |               | Mir3470a  | Mir3470a  |                              |          |
| <i>Mir3471-2</i> |               | Mir3471-2 | Mir3471-2 |                              |          |
| <i>Mir3473a</i>  | Mir3473a      | Mir3473a  | Mir3473a  |                              |          |
| <i>Mir3473c</i>  |               |           | Mir3473c  |                              | Mir3473c |
| <i>Mir3473f</i>  | Mir3473f      | Mir3473f  | Mir3473f  |                              |          |
| <i>Mir3475</i>   |               |           | Mir3475   |                              | Mir3475  |
| <i>Mir34b</i>    |               | Mir34b    |           | Mir34b                       |          |
| <i>Mir34c</i>    |               | Mir34c    |           | Mir34c                       |          |
| <i>Mir350</i>    |               | Mir350    |           | Mir350                       |          |
| <i>Mir361</i>    |               |           | Mir361    |                              | Mir361   |
| <i>Mir363</i>    |               | Mir363    |           | Mir363                       |          |
| <i>Mir367</i>    |               | Mir367    |           | Mir367                       |          |
| <i>Mir370</i>    | Mir370        |           | Mir370    |                              |          |
| <i>Mir375</i>    |               | Mir375    |           | Mir375                       |          |
| <i>Mir376a</i>   |               |           | Mir376a   |                              | Mir376a  |
| <i>Mir376b</i>   |               |           | Mir376b   |                              | Mir376b  |
| <i>Mir376c</i>   |               |           | Mir376c   |                              | Mir376c  |
| <i>Mir377</i>    | Mir377        |           | Mir377    |                              |          |
| <i>Mir378a</i>   |               | Mir378a   | Mir378a   |                              |          |
| <i>Mir378b</i>   |               |           | Mir378b   |                              | Mir378b  |
| <i>Mir381</i>    |               |           | Mir381    |                              | Mir381   |
| <i>Mir383</i>    | Mir383        |           |           |                              |          |
| <i>Mir3960</i>   |               |           | Mir3960   |                              | Mir3960  |
| <i>Mir3963</i>   |               | Mir3963   |           | Mir3963                      |          |
| <i>Mir3966</i>   |               | Mir3966   | Mir3966   |                              |          |
| <i>Mir3967</i>   | Mir3967       |           | Mir3967   |                              |          |
| <i>Mir3970</i>   |               | Mir3970   |           | Mir3970                      |          |
| <i>Mir429</i>    |               | Mir429    |           | Mir429                       |          |
| <i>Mir432</i>    | Mir432        |           |           |                              |          |
| <i>Mir434</i>    | Mir434        |           |           |                              |          |
| <i>Mir448</i>    |               | Mir448    |           | Mir448                       |          |
| <i>Mir449a</i>   | Mir449a       | Mir449a   | Mir449a   |                              |          |
| <i>Mir449b</i>   | Mir449b       | Mir449b   | Mir449b   |                              |          |
| <i>Mir450-1</i>  | Mir450-1      |           |           |                              |          |
| <i>Mir450-2</i>  | Mir450-2      |           |           |                              |          |
| <i>Mir450b</i>   | Mir450b       |           |           |                              |          |
| <i>Mir451b</i>   |               |           | Mir451b   |                              |          |
| <i>Mir452</i>    |               | Mir452    |           | Mir452                       |          |

Suppl. Table 1  
(119/234)

|                   | ChIP-Seq hits |           |            | Unique hits with interactors |            |
|-------------------|---------------|-----------|------------|------------------------------|------------|
|                   | unstimulated  | Ac        | LPS        | Ac                           | LPS        |
| <i>Mir465b-1</i>  | Mir465b-1     |           |            |                              |            |
| <i>Mir465b-2</i>  | Mir465b-2     |           |            |                              |            |
| <i>Mir465d</i>    | Mir465d       |           |            |                              |            |
| <i>Mir466</i>     |               | Mir466    |            | Mir466                       |            |
| <i>Mir466b-1</i>  |               |           | Mir466b-1  |                              |            |
| <i>Mir466b-4</i>  |               |           | Mir466b-4  |                              |            |
| <i>Mir466b-5</i>  |               |           | Mir466b-5  |                              |            |
| <i>Mir466b-6</i>  |               |           | Mir466b-6  |                              |            |
| <i>Mir466b-7</i>  |               |           | Mir466b-7  |                              |            |
| <i>Mir466b-8</i>  |               | Mir466b-8 | Mir466b-8  |                              |            |
| <i>Mir466c-1</i>  |               |           | Mir466c-1  |                              |            |
| <i>Mir466c-2</i>  |               |           | Mir466c-2  |                              |            |
| <i>Mir466e</i>    |               | Mir466e   | Mir466e    |                              |            |
| <i>Mir466f-2</i>  |               |           | Mir466f-2  |                              |            |
| <i>Mir466f-3</i>  |               | Mir466f-3 |            | Mir466f-3                    |            |
| <i>Mir466j</i>    | Mir466j       |           |            |                              |            |
| <i>Mir467a-1</i>  |               | Mir467a-1 | Mir467a-1  |                              |            |
| <i>Mir467a-10</i> |               |           | Mir467a-10 |                              | Mir467a-10 |
| <i>Mir467a-2</i>  |               | Mir467a-2 | Mir467a-2  |                              |            |
| <i>Mir467a-3</i>  |               |           | Mir467a-3  |                              |            |
| <i>Mir467a-4</i>  |               | Mir467a-4 | Mir467a-4  |                              |            |
| <i>Mir467a-5</i>  |               | Mir467a-5 | Mir467a-5  |                              |            |
| <i>Mir467a-6</i>  |               |           | Mir467a-6  |                              |            |
| <i>Mir467a-7</i>  |               | Mir467a-7 | Mir467a-7  |                              |            |
| <i>Mir467a-8</i>  |               | Mir467a-8 | Mir467a-8  |                              |            |
| <i>Mir467a-9</i>  |               | Mir467a-9 | Mir467a-9  |                              |            |
| <i>Mir467c</i>    | Mir467c       |           | Mir467c    |                              |            |
| <i>Mir467e</i>    |               |           | Mir467e    |                              | Mir467e    |
| <i>Mir467g</i>    |               |           | Mir467g    |                              | Mir467g    |
| <i>Mir467h</i>    | Mir467h       | Mir467h   |            |                              |            |
| <i>Mir468</i>     |               | Mir468    |            | Mir468                       |            |
| <i>Mir484</i>     | Mir484        |           | Mir484     |                              |            |
| <i>Mir486</i>     |               |           | Mir486     |                              | Mir486     |
| <i>Mir490</i>     |               | Mir490    |            | Mir490                       |            |
| <i>Mir491</i>     |               |           | Mir491     |                              | Mir491     |
| <i>Mir496a</i>    | Mir496a       |           | Mir496a    |                              |            |
| <i>Mir496b</i>    | Mir496b       |           |            |                              |            |
| <i>Mir497</i>     | Mir497        |           |            |                              |            |
| <i>Mir5098</i>    | Mir5098       | Mir5098   | Mir5098    |                              |            |
| <i>Mir5099</i>    | Mir5099       | Mir5099   | Mir5099    |                              |            |
| <i>Mir5100</i>    |               | Mir5100   |            |                              |            |
| <i>Mir5103</i>    |               |           | Mir5103    |                              |            |
| <i>Mir5104</i>    |               | Mir5104   | Mir5104    |                              |            |
| <i>Mir511</i>     | Mir511        | Mir511    |            |                              |            |
| <i>Mir5112</i>    |               |           | Mir5112    |                              | Mir5112    |
| <i>Mir5113</i>    |               |           | Mir5113    |                              | Mir5113    |
| <i>Mir5116</i>    | Mir5116       | Mir5116   | Mir5116    |                              |            |
| <i>Mir5118</i>    |               |           | Mir5118    |                              |            |
| <i>Mir5119</i>    | Mir5119       | Mir5119   | Mir5119    |                              |            |

Suppl. Table 1  
(120/234)

|                  | ChIP-Seq hits |         |           | Unique hits with interactors |         |
|------------------|---------------|---------|-----------|------------------------------|---------|
|                  | unstimulated  | Ac      | LPS       | Ac                           | LPS     |
| <i>Mir5120</i>   |               | Mir5120 |           |                              |         |
| <i>Mir5122</i>   |               | Mir5122 | Mir5122   |                              |         |
| <i>Mir5124b</i>  |               |         | Mir5124b  |                              |         |
| <i>Mir5125</i>   |               |         | Mir5125   |                              | Mir5125 |
| <i>Mir5127</i>   |               | Mir5127 |           | Mir5127                      |         |
| <i>Mir5129</i>   |               | Mir5129 |           | Mir5129                      |         |
| <i>Mir5130</i>   | Mir5130       |         |           |                              |         |
| <i>Mir5132</i>   | Mir5132       | Mir5132 |           |                              |         |
| <i>Mir5133</i>   |               | Mir5133 |           | Mir5133                      |         |
| <i>Mir5134</i>   |               | Mir5134 |           | Mir5134                      |         |
| <i>Mir5135</i>   |               |         | Mir5135   |                              | Mir5135 |
| <i>Mir5136</i>   |               |         | Mir5136   |                              |         |
| <i>Mir532</i>    |               |         | Mir532    |                              | Mir532  |
| <i>Mir542</i>    | Mir542        |         |           |                              |         |
| <i>Mir546</i>    |               | Mir546  |           | Mir546                       |         |
| <i>Mir551b</i>   |               | Mir551b | Mir551b   |                              |         |
| <i>Mir5615-2</i> |               |         | Mir5615-2 |                              |         |
| <i>Mir5616</i>   | Mir5616       | Mir5616 | Mir5616   |                              |         |
| <i>Mir5623</i>   |               | Mir5623 |           |                              |         |
| <i>Mir5624</i>   |               |         | Mir5624   |                              |         |
| <i>Mir5710</i>   |               |         | Mir5710   |                              |         |
| <i>Mir598</i>    | Mir598        |         |           |                              |         |
| <i>Mir615</i>    | Mir615        |         | Mir615    |                              |         |
| <i>Mir6236</i>   |               | Mir6236 |           |                              |         |
| <i>Mir6238</i>   |               | Mir6238 |           |                              |         |
| <i>Mir6244</i>   |               |         | Mir6244   |                              |         |
| <i>Mir6335</i>   |               | Mir6335 |           |                              |         |
| <i>Mir6336</i>   |               | Mir6336 |           |                              |         |
| <i>Mir6340</i>   |               |         | Mir6340   |                              |         |
| <i>Mir6345</i>   | Mir6345       |         | Mir6345   |                              |         |
| <i>Mir6347</i>   |               | Mir6347 | Mir6347   |                              |         |
| <i>Mir6348</i>   |               | Mir6348 |           |                              |         |
| <i>Mir6353</i>   |               | Mir6353 |           |                              |         |
| <i>Mir6355</i>   |               | Mir6355 |           |                              |         |
| <i>Mir6356</i>   |               |         | Mir6356   |                              |         |
| <i>Mir6359</i>   |               | Mir6359 |           |                              |         |
| <i>Mir6362</i>   |               | Mir6362 |           |                              |         |
| <i>Mir6363</i>   |               |         | Mir6363   |                              |         |
| <i>Mir6364</i>   | Mir6364       |         |           |                              |         |
| <i>Mir6365</i>   |               | Mir6365 |           |                              |         |
| <i>Mir6366</i>   |               | Mir6366 |           |                              |         |
| <i>Mir6375</i>   |               | Mir6375 | Mir6375   |                              |         |
| <i>Mir6377</i>   | Mir6377       |         |           |                              |         |
| <i>Mir6378</i>   |               | Mir6378 |           |                              |         |
| <i>Mir6379</i>   | Mir6379       |         |           |                              |         |
| <i>Mir6384</i>   |               | Mir6384 |           |                              |         |
| <i>Mir6385</i>   |               |         | Mir6385   |                              |         |
| <i>Mir6386</i>   |               | Mir6386 |           |                              |         |
| <i>Mir6387</i>   |               | Mir6387 |           |                              |         |



Suppl. Table 1  
(121/234)

|                  | CHIP-Seq hits |           |           | Unique hits with interactors |           |
|------------------|---------------|-----------|-----------|------------------------------|-----------|
|                  | unstimulated  | Ac        | LPS       | Ac                           | LPS       |
| <i>Mir6389</i>   |               |           | Mir6389   |                              |           |
| <i>Mir6390</i>   | Mir6390       | Mir6390   |           |                              |           |
| <i>Mir6395</i>   | Mir6395       | Mir6395   |           |                              |           |
| <i>Mir6397</i>   |               | Mir6397   |           |                              |           |
| <i>Mir6398</i>   |               | Mir6398   | Mir6398   |                              |           |
| <i>Mir6399</i>   | Mir6399       | Mir6399   | Mir6399   |                              |           |
| <i>Mir6400</i>   | Mir6400       |           |           |                              |           |
| <i>Mir6401</i>   | Mir6401       |           |           |                              |           |
| <i>Mir6403</i>   |               | Mir6403   |           |                              |           |
| <i>Mir6405</i>   |               | Mir6405   | Mir6405   |                              |           |
| <i>Mir6407</i>   | Mir6407       |           |           |                              |           |
| <i>Mir6409</i>   |               | Mir6409   |           |                              |           |
| <i>Mir6410</i>   |               |           | Mir6410   |                              |           |
| <i>Mir6417</i>   | Mir6417       | Mir6417   | Mir6417   |                              |           |
| <i>Mir6420</i>   |               |           | Mir6420   |                              |           |
| <i>Mir6516</i>   |               | Mir6516   | Mir6516   |                              |           |
| <i>Mir6537</i>   |               | Mir6537   |           |                              |           |
| <i>Mir654</i>    |               |           | Mir654    |                              | Mir654    |
| <i>Mir6541</i>   |               | Mir6541   |           |                              |           |
| <i>Mir6546</i>   |               | Mir6546   |           |                              |           |
| <i>Mir664</i>    |               |           | Mir664    |                              | Mir664    |
| <i>Mir669a-1</i> |               | Mir669a-1 | Mir669a-1 |                              |           |
| <i>Mir669a-2</i> |               | Mir669a-2 | Mir669a-2 |                              |           |
| <i>Mir669a-3</i> |               |           | Mir669a-3 |                              | Mir669a-3 |
| <i>Mir669e</i>   |               | Mir669e   |           | Mir669e                      |           |
| <i>Mir669g</i>   |               | Mir669g   |           | Mir669g                      |           |
| <i>Mir669j</i>   |               | Mir669j   |           | Mir669j                      |           |
| <i>Mir669k</i>   |               |           | Mir669k   |                              | Mir669k   |
| <i>Mir669m-1</i> |               | Mir669m-1 |           |                              |           |
| <i>Mir674</i>    |               |           | Mir674    |                              | Mir674    |
| <i>Mir677</i>    | Mir677        |           | Mir677    |                              |           |
| <i>Mir680-2</i>  | Mir680-2      |           | Mir680-2  |                              |           |
| <i>Mir681</i>    |               |           | Mir681    |                              | Mir681    |
| <i>Mir682</i>    |               | Mir682    |           | Mir682                       |           |
| <i>Mir684-1</i>  | Mir684-1      | Mir684-1  | Mir684-1  |                              |           |
| <i>Mir684-2</i>  |               |           | Mir684-2  |                              | Mir684-2  |
| <i>Mir686</i>    | Mir686        |           |           |                              |           |
| <i>Mir688</i>    | Mir688        | Mir688    | Mir688    |                              |           |
| <i>Mir6896</i>   |               | Mir6896   |           |                              |           |
| <i>Mir6897</i>   |               | Mir6897   |           |                              |           |
| <i>Mir6899</i>   |               |           | Mir6899   |                              |           |
| <i>Mir690</i>    |               | Mir690    |           | Mir690                       |           |
| <i>Mir6900</i>   |               | Mir6900   |           |                              |           |
| <i>Mir6901</i>   |               |           | Mir6901   |                              |           |
| <i>Mir6902</i>   |               |           | Mir6902   |                              |           |
| <i>Mir6904</i>   |               |           | Mir6904   |                              |           |
| <i>Mir6905</i>   |               | Mir6905   |           |                              |           |
| <i>Mir6906</i>   |               |           | Mir6906   |                              |           |
| <i>Mir691</i>    |               |           | Mir691    |                              | Mir691    |

Suppl. Table 1  
(122/234)

|                 | ChIP-Seq hits |          |          | Unique hits with interactors |          |
|-----------------|---------------|----------|----------|------------------------------|----------|
|                 | unstimulated  | Ac       | LPS      | Ac                           | LPS      |
| <i>Mir6910</i>  |               | Mir6910  |          |                              |          |
| <i>Mir6911</i>  |               | Mir6911  | Mir6911  |                              |          |
| <i>Mir6913</i>  |               | Mir6913  |          |                              |          |
| <i>Mir6917</i>  | Mir6917       |          |          |                              |          |
| <i>Mir6918</i>  | Mir6918       | Mir6918  | Mir6918  |                              |          |
| <i>Mir6920</i>  |               | Mir6920  |          |                              |          |
| <i>Mir692-1</i> |               |          | Mir692-1 |                              |          |
| <i>Mir6921</i>  |               | Mir6921  |          |                              |          |
| <i>Mir692-2</i> |               |          | Mir692-2 |                              | Mir692-2 |
| <i>Mir6922</i>  |               | Mir6922  |          |                              |          |
| <i>Mir692-3</i> |               |          | Mir692-3 |                              |          |
| <i>Mir6924</i>  |               | Mir6924  |          |                              |          |
| <i>Mir6926</i>  |               | Mir6926  | Mir6926  |                              |          |
| <i>Mir6928</i>  | Mir6928       | Mir6928  |          |                              |          |
| <i>Mir6930</i>  |               | Mir6930  |          |                              |          |
| <i>Mir6932</i>  | Mir6932       | Mir6932  | Mir6932  |                              |          |
| <i>Mir6933</i>  |               |          | Mir6933  |                              |          |
| <i>Mir6936</i>  |               | Mir6936  | Mir6936  |                              |          |
| <i>Mir6939</i>  |               |          | Mir6939  |                              |          |
| <i>Mir694</i>   |               |          | Mir694   |                              | Mir694   |
| <i>Mir6941</i>  |               | Mir6941  |          |                              |          |
| <i>Mir6942</i>  |               |          | Mir6942  |                              |          |
| <i>Mir6943</i>  |               |          | Mir6943  |                              |          |
| <i>Mir6944</i>  |               | Mir6944  | Mir6944  |                              |          |
| <i>Mir6945</i>  | Mir6945       |          |          |                              |          |
| <i>Mir6947</i>  |               | Mir6947  | Mir6947  |                              |          |
| <i>Mir6949</i>  | Mir6949       |          |          |                              |          |
| <i>Mir6951</i>  |               |          | Mir6951  |                              |          |
| <i>Mir6953</i>  | Mir6953       |          | Mir6953  |                              |          |
| <i>Mir6954</i>  |               | Mir6954  |          |                              |          |
| <i>Mir6957</i>  | Mir6957       |          |          |                              |          |
| <i>Mir6959</i>  |               | Mir6959  |          |                              |          |
| <i>Mir6960</i>  |               | Mir6960  |          |                              |          |
| <i>Mir6962</i>  |               | Mir6962  |          |                              |          |
| <i>Mir6963</i>  |               |          | Mir6963  |                              |          |
| <i>Mir6966</i>  |               | Mir6966  |          |                              |          |
| <i>Mir6970</i>  | Mir6970       |          |          |                              |          |
| <i>Mir6973a</i> |               | Mir6973a | Mir6973a |                              |          |
| <i>Mir6973b</i> |               |          | Mir6973b |                              |          |
| <i>Mir6974</i>  |               |          | Mir6974  |                              |          |
| <i>Mir698</i>   |               |          | Mir698   |                              | Mir698   |
| <i>Mir6980</i>  |               | Mir6980  |          |                              |          |
| <i>Mir6982</i>  | Mir6982       | Mir6982  |          |                              |          |
| <i>Mir6984</i>  | Mir6984       | Mir6984  |          |                              |          |
| <i>Mir6985</i>  |               | Mir6985  |          |                              |          |
| <i>Mir6989</i>  |               | Mir6989  | Mir6989  |                              |          |
| <i>Mir6991</i>  | Mir6991       |          |          |                              |          |
| <i>Mir6993</i>  |               | Mir6993  |          |                              |          |
| <i>Mir6994</i>  |               | Mir6994  |          |                              |          |

Suppl. Table 1  
(123/234)

|                  | ChIP-Seq hits |           |           | Unique hits with interactors |        |
|------------------|---------------|-----------|-----------|------------------------------|--------|
|                  | unstimulated  | Ac        | LPS       | Ac                           | LPS    |
| <i>Mir6997</i>   | Mir6997       |           |           |                              |        |
| <i>Mir6998</i>   |               | Mir6998   |           |                              |        |
| <i>Mir700</i>    |               | Mir700    |           |                              |        |
| <i>Mir7000</i>   |               |           | Mir7000   |                              |        |
| <i>Mir7009</i>   |               | Mir7009   |           |                              |        |
| <i>Mir701</i>    | Mir701        |           |           |                              |        |
| <i>Mir7010</i>   |               | Mir7010   | Mir7010   |                              |        |
| <i>Mir7012</i>   | Mir7012       | Mir7012   |           |                              |        |
| <i>Mir7013</i>   |               |           | Mir7013   |                              |        |
| <i>Mir7015</i>   |               | Mir7015   |           |                              |        |
| <i>Mir7016</i>   |               | Mir7016   |           |                              |        |
| <i>Mir7018</i>   |               | Mir7018   |           |                              |        |
| <i>Mir7019</i>   |               | Mir7019   |           |                              |        |
| <i>Mir7025</i>   |               | Mir7025   |           |                              |        |
| <i>Mir7030</i>   |               |           | Mir7030   |                              |        |
| <i>Mir7034</i>   |               | Mir7034   |           |                              |        |
| <i>Mir7036</i>   |               | Mir7036   |           |                              |        |
| <i>Mir7040</i>   | Mir7040       | Mir7040   | Mir7040   |                              |        |
| <i>Mir7042</i>   |               | Mir7042   |           |                              |        |
| <i>Mir7045</i>   |               | Mir7045   | Mir7045   |                              |        |
| <i>Mir7046</i>   |               | Mir7046   |           |                              |        |
| <i>Mir7049</i>   |               | Mir7049   | Mir7049   |                              |        |
| <i>Mir7054</i>   |               |           | Mir7054   |                              |        |
| <i>Mir7057</i>   |               | Mir7057   | Mir7057   |                              |        |
| <i>Mir7059</i>   |               | Mir7059   |           |                              |        |
| <i>Mir706</i>    |               |           | Mir706    |                              | Mir706 |
| <i>Mir7060</i>   |               | Mir7060   |           |                              |        |
| <i>Mir7061</i>   |               | Mir7061   |           |                              |        |
| <i>Mir7065</i>   | Mir7065       |           |           |                              |        |
| <i>Mir7066</i>   |               |           | Mir7066   |                              |        |
| <i>Mir7067</i>   |               | Mir7067   |           |                              |        |
| <i>Mir7068</i>   | Mir7068       | Mir7068   | Mir7068   |                              |        |
| <i>Mir7069</i>   | Mir7069       | Mir7069   |           |                              |        |
| <i>Mir7070</i>   |               |           | Mir7070   |                              |        |
| <i>Mir7073</i>   | Mir7073       |           |           |                              |        |
| <i>Mir7075</i>   | Mir7075       |           |           |                              |        |
| <i>Mir7079</i>   |               |           | Mir7079   |                              |        |
| <i>Mir708</i>    | Mir708        |           |           |                              |        |
| <i>Mir7082</i>   |               |           | Mir7082   |                              |        |
| <i>Mir7084</i>   |               | Mir7084   | Mir7084   |                              |        |
| <i>Mir7089</i>   |               |           | Mir7089   |                              |        |
| <i>Mir7090</i>   |               | Mir7090   |           |                              |        |
| <i>Mir7091</i>   |               |           | Mir7091   |                              |        |
| <i>Mir7094-1</i> |               | Mir7094-1 |           |                              |        |
| <i>Mir7094-2</i> |               |           | Mir7094-2 |                              |        |
| <i>Mir7-1</i>    | Mir7-1        |           |           |                              |        |
| <i>Mir7115</i>   |               |           | Mir7115   |                              |        |
| <i>Mir7117</i>   | Mir7117       | Mir7117   | Mir7117   |                              |        |
| <i>Mir7118</i>   |               | Mir7118   |           |                              |        |

Suppl. Table 1  
(124/234)

|                  | ChIP-Seq hits |           |         | Unique hits with interactors |        |
|------------------|---------------|-----------|---------|------------------------------|--------|
|                  | unstimulated  | Ac        | LPS     | Ac                           | LPS    |
| <i>Mir717</i>    |               | Mir717    |         | Mir717                       |        |
| <i>Mir718</i>    | Mir718        | Mir718    |         |                              |        |
| <i>Mir719</i>    |               | Mir719    |         |                              |        |
| <i>Mir7-2</i>    |               | Mir7-2    |         | Mir7-2                       |        |
| <i>Mir721</i>    | Mir721        |           | Mir721  |                              |        |
| <i>Mir7210</i>   |               | Mir7210   |         |                              |        |
| <i>Mir7211</i>   |               | Mir7211   |         |                              |        |
| <i>Mir7217</i>   |               | Mir7217   | Mir7217 |                              |        |
| <i>Mir7218</i>   |               | Mir7218   | Mir7218 |                              |        |
| <i>Mir7223</i>   | Mir7223       |           | Mir7223 |                              |        |
| <i>Mir7227</i>   | Mir7227       |           |         |                              |        |
| <i>Mir7228</i>   |               | Mir7228   | Mir7228 |                              |        |
| <i>Mir7232</i>   |               | Mir7232   |         |                              |        |
| <i>Mir7233</i>   |               | Mir7233   |         |                              |        |
| <i>Mir7238</i>   | Mir7238       |           | Mir7238 |                              |        |
| <i>Mir7241</i>   |               | Mir7241   |         |                              |        |
| <i>Mir7242</i>   |               | Mir7242   |         |                              |        |
| <i>Mir742</i>    |               | Mir742    |         | Mir742                       |        |
| <i>Mir7578</i>   |               | Mir7578   |         |                              |        |
| <i>Mir759</i>    |               |           | Mir759  |                              | Mir759 |
| <i>Mir760</i>    | Mir760        |           |         |                              |        |
| <i>Mir761</i>    | Mir761        |           |         |                              |        |
| <i>Mir7647</i>   | Mir7647       |           |         |                              |        |
| <i>Mir7648</i>   |               | Mir7648   |         |                              |        |
| <i>Mir7649</i>   | Mir7649       |           | Mir7649 |                              |        |
| <i>Mir7651</i>   |               |           | Mir7651 |                              |        |
| <i>Mir7652</i>   |               | Mir7652   |         |                              |        |
| <i>Mir7658</i>   |               |           | Mir7658 |                              |        |
| <i>Mir7659</i>   |               | Mir7659   |         |                              |        |
| <i>Mir7662</i>   |               | Mir7662   |         |                              |        |
| <i>Mir7663</i>   |               | Mir7663   |         |                              |        |
| <i>Mir7669</i>   | Mir7669       |           |         |                              |        |
| <i>Mir7672</i>   |               | Mir7672   |         |                              |        |
| <i>Mir7675</i>   |               |           | Mir7675 |                              |        |
| <i>Mir7676-1</i> |               | Mir7676-1 |         |                              |        |
| <i>Mir7676-2</i> |               | Mir7676-2 |         |                              |        |
| <i>Mir7678</i>   |               | Mir7678   |         |                              |        |
| <i>Mir7679</i>   |               | Mir7679   | Mir7679 |                              |        |
| <i>Mir7682</i>   |               |           | Mir7682 |                              |        |
| <i>Mir7684</i>   |               | Mir7684   |         |                              |        |
| <i>Mir7689</i>   |               | Mir7689   |         |                              |        |
| <i>Mir770</i>    |               | Mir770    |         | Mir770                       |        |
| <i>Mir7b</i>     |               |           | Mir7b   |                              | Mir7b  |
| <i>Mir8090</i>   |               | Mir8090   | Mir8090 |                              |        |
| <i>Mir8091</i>   |               |           | Mir8091 |                              |        |
| <i>Mir8092</i>   | Mir8092       |           |         |                              |        |
| <i>Mir8093</i>   |               |           | Mir8093 |                              |        |
| <i>Mir8094</i>   |               | Mir8094   |         |                              |        |
| <i>Mir8095</i>   | Mir8095       | Mir8095   | Mir8095 |                              |        |

Suppl. Table 1  
(125/234)

|                   | ChIP-Seq hits |           |            | Unique hits with interactors |         |
|-------------------|---------------|-----------|------------|------------------------------|---------|
|                   | unstimulated  | Ac        | LPS        | Ac                           | LPS     |
| <i>Mir8096</i>    | Mir8096       |           |            |                              |         |
| <i>Mir8098</i>    | Mir8098       | Mir8098   |            |                              |         |
| <i>Mir8099-1</i>  |               | Mir8099-1 | Mir8099-1  |                              |         |
| <i>Mir8099-2</i>  |               | Mir8099-2 | Mir8099-2  |                              |         |
| <i>Mir8102</i>    |               | Mir8102   |            |                              |         |
| <i>Mir8103</i>    |               |           | Mir8103    |                              |         |
| <i>Mir8105</i>    | Mir8105       |           | Mir8105    |                              |         |
| <i>Mir8108</i>    |               | Mir8108   |            |                              |         |
| <i>Mir8109</i>    | Mir8109       | Mir8109   |            |                              |         |
| <i>Mir8112</i>    |               |           | Mir8112    |                              |         |
| <i>Mir8113</i>    |               |           | Mir8113    |                              |         |
| <i>Mir8115</i>    | Mir8115       | Mir8115   | Mir8115    |                              |         |
| <i>Mir8116</i>    |               |           | Mir8116    |                              |         |
| <i>Mir8117</i>    |               | Mir8117   |            |                              |         |
| <i>Mir8120</i>    |               | Mir8120   | Mir8120    |                              |         |
| <i>Mir871</i>     |               |           | Mir871     |                              | Mir871  |
| <i>Mir873b</i>    |               |           | Mir873b    |                              |         |
| <i>Mir879</i>     |               | Mir879    |            | Mir879                       |         |
| <i>Mir882</i>     | Mir882        |           |            |                              |         |
| <i>Mir883a</i>    |               | Mir883a   |            | Mir883a                      |         |
| <i>Mir92-1</i>    |               |           | Mir92-1    |                              | Mir92-1 |
| <i>Mir92-2</i>    |               | Mir92-2   |            |                              |         |
| <i>Mir92b</i>     |               | Mir92b    |            | Mir92b                       |         |
| <i>Mir99a</i>     | Mir99a        |           |            |                              |         |
| <i>Mira</i>       | Mira          | Mira      | Mira       |                              |         |
| <i>Mirg</i>       | Mirg          | Mirg      | Mirg       |                              |         |
| <i>Mirlet7a-1</i> | Mirlet7a-1    |           | Mirlet7a-1 |                              |         |
| <i>Mirlet7c-1</i> | Mirlet7c-1    |           |            |                              |         |
| <i>Mirlet7d</i>   | Mirlet7d      |           |            |                              |         |
| <i>Mirlet7f-1</i> | Mirlet7f-1    |           | Mirlet7f-1 |                              |         |
| <i>Mirlet7g</i>   |               | Mirlet7g  | Mirlet7g   |                              |         |
| <i>Mis18a</i>     | Mis18a        |           |            |                              |         |
| <i>Mis18bp1</i>   |               | Mis18bp1  |            |                              |         |
| <i>Misp</i>       |               |           | Misp       |                              |         |
| <i>Mitd1</i>      |               |           | Mitd1      |                              |         |
| <i>Mitf</i>       | Mitf          |           |            |                              |         |
| <i>Mkks</i>       |               |           | Mkks       |                              |         |
| <i>Mkrn2</i>      |               |           | Mkrn2      |                              |         |
| <i>Mkrn2os</i>    |               |           | Mkrn2os    |                              | Mkrn2os |
| <i>Mlana</i>      | Mlana         |           |            |                              |         |
| <i>Mlec</i>       |               |           | Mlec       |                              |         |
| <i>Mlh3</i>       | Mlh3          |           |            |                              |         |
| <i>Mlip</i>       |               |           | Mlip       |                              |         |
| <i>Mllt3</i>      |               | Mllt3     |            | Mllt3                        |         |
| <i>Mlph</i>       |               | Mlph      |            |                              |         |
| <i>Mlst8</i>      | Mlst8         | Mlst8     |            |                              |         |
| <i>Mlx</i>        |               | Mlx       |            |                              |         |
| <i>Mlxip</i>      |               | Mlxip     | Mlxip      |                              |         |
| <i>Mlxipl</i>     |               | Mlxipl    | Mlxipl     |                              |         |

Suppl. Table 1  
(126/234)

|                    | ChIP-Seq hits |         |             | Unique hits with interactors |     |
|--------------------|---------------|---------|-------------|------------------------------|-----|
|                    | unstimulated  | Ac      | LPS         | Ac                           | LPS |
| <i>Mmab</i>        |               | Mmab    |             |                              |     |
| <i>Mmachc</i>      | Mmachc        | Mmachc  | Mmachc      |                              |     |
| <i>Mmadhc</i>      |               | Mmadhc  | Mmadhc      |                              |     |
| <i>Mmd</i>         | Mmd           |         |             |                              |     |
| <i>Mmel1</i>       |               | Mmel1   |             |                              |     |
| <i>Mmgt1</i>       |               | Mmgt1   |             | Mmgt1                        |     |
| <i>Mmp10</i>       | Mmp10         |         |             |                              |     |
| <i>Mmp12</i>       |               | Mmp12   |             | Mmp12                        |     |
| <i>Mmp14</i>       | Mmp14         |         | Mmp14       |                              |     |
| <i>Mmp19</i>       | Mmp19         | Mmp19   | Mmp19       |                              |     |
| <i>Mmp1a</i>       |               |         | Mmp1a       |                              |     |
| <i>Mmp1b</i>       |               | Mmp1b   |             |                              |     |
| <i>Mmp25</i>       | Mmp25         | Mmp25   | Mmp25       |                              |     |
| <i>Mmp27</i>       |               | Mmp27   |             |                              |     |
| <i>Mmp28</i>       | Mmp28         |         | Mmp28       |                              |     |
| <i>Mmp7</i>        |               |         | Mmp7        |                              |     |
| <i>Mmp8</i>        |               |         | Mmp8        |                              |     |
| <i>Mmp9</i>        |               | Mmp9    |             | Mmp9                         |     |
| <i>Mmrn2</i>       |               |         | Mmrn2       |                              |     |
| <i>Mms19</i>       |               | Mms19   | Mms19       |                              |     |
| <i>Mnat1</i>       | Mnat1         |         |             |                              |     |
| <i>Mnd1</i>        |               |         | Mnd1        |                              |     |
| <i>Mnd1-ps</i>     |               | Mnd1-ps |             |                              |     |
| <i>Mndal</i>       |               | Mndal   |             |                              |     |
| <i>Mnx1</i>        |               | Mnx1    |             |                              |     |
| <i>Moap1</i>       | Moap1         |         |             |                              |     |
| <i>Mob1a</i>       |               | Mob1a   | Mob1a       |                              |     |
| <i>Mob1b</i>       |               |         | Mob1b       |                              |     |
| <i>Mob3a</i>       |               | Mob3a   | Mob3a       |                              |     |
| <i>Mob3c</i>       |               |         | Mob3c       |                              |     |
| <i>Mobp</i>        |               |         | Mobp        |                              |     |
| <i>Mocs1</i>       | Mocs1         |         |             |                              |     |
| <i>Mocs3</i>       | Mocs3         |         |             |                              |     |
| <i>Mog</i>         | Mog           |         | Mog         |                              |     |
| <i>Mogat1</i>      | Mogat1        | Mogat1  | Mogat1      |                              |     |
| <i>Mogat2</i>      | Mogat2        |         | Mogat2      |                              |     |
| <i>Mogs</i>        |               | Mogs    | Mogs        |                              |     |
| <i>Mon1b</i>       |               |         | Mon1b       |                              |     |
| <i>Mon2</i>        |               |         | Mon2        |                              |     |
| <i>Morc2a</i>      | Morc2a        | Morc2a  | Morc2a      |                              |     |
| <i>Morc2b</i>      |               | Morc2b  | Morc2b      |                              |     |
| <i>Morc3</i>       | Morc3         | Morc3   | Morc3       |                              |     |
| <i>Morf4l1</i>     | Morf4l1       | Morf4l1 | Morf4l1     |                              |     |
| <i>Morf4l1-ps1</i> |               |         | Morf4l1-ps1 |                              |     |
| <i>Morn2</i>       |               |         | Morn2       |                              |     |
| <i>Morn4</i>       |               | Morn4   | Morn4       |                              |     |
| <i>Morn5</i>       |               | Morn5   |             |                              |     |
| <i>Mos</i>         |               |         | Mos         |                              | Mos |
| <i>Mospd2</i>      |               | Mospd2  |             |                              |     |

Suppl. Table 1  
(127/234)

|                 | ChIP-Seq hits   |                |                 | Unique hits with interactors |               |
|-----------------|-----------------|----------------|-----------------|------------------------------|---------------|
|                 | unstimulated    | Ac             | LPS             | Ac                           | LPS           |
| <i>Mospd4</i>   |                 | <i>Mospd4</i>  |                 |                              |               |
| <i>Mov10</i>    |                 | <i>Mov10</i>   |                 | <i>Mov10</i>                 |               |
| <i>Moxd2</i>    |                 | <i>Moxd2</i>   | <i>Moxd2</i>    |                              |               |
| <i>Mpc1</i>     |                 |                | <i>Mpc1</i>     |                              |               |
| <i>Mpc2</i>     |                 |                | <i>Mpc2</i>     |                              |               |
| <i>Mpdu1</i>    |                 |                | <i>Mpdu1</i>    |                              |               |
| <i>Mpdz</i>     |                 | <i>Mpdz</i>    |                 |                              |               |
| <i>Mphosph8</i> | <i>Mphosph8</i> |                | <i>Mphosph8</i> |                              |               |
| <i>Mpl</i>      | <i>Mpl</i>      | <i>Mpl</i>     | <i>Mpl</i>      |                              |               |
| <i>Mpnd</i>     | <i>Mpnd</i>     | <i>Mpnd</i>    | <i>Mpnd</i>     |                              |               |
| <i>Mpp1</i>     |                 | <i>Mpp1</i>    |                 |                              |               |
| <i>Mpp2</i>     | <i>Mpp2</i>     |                |                 |                              |               |
| <i>Mpp3</i>     |                 |                | <i>Mpp3</i>     |                              |               |
| <i>Mpp4</i>     | <i>Mpp4</i>     |                |                 |                              |               |
| <i>Mpp6</i>     |                 | <i>Mpp6</i>    |                 |                              |               |
| <i>Mpp7</i>     |                 | <i>Mpp7</i>    |                 | <i>Mpp7</i>                  |               |
| <i>Mppe1</i>    |                 |                | <i>Mppe1</i>    |                              |               |
| <i>Mpped1</i>   |                 |                | <i>Mpped1</i>   |                              |               |
| <i>Mpped2</i>   |                 |                | <i>Mpped2</i>   |                              |               |
| <i>Mpv17l</i>   | <i>Mpv17l</i>   | <i>Mpv17l</i>  | <i>Mpv17l</i>   |                              |               |
| <i>Mr1</i>      | <i>Mr1</i>      | <i>Mr1</i>     |                 |                              |               |
| <i>Mrc1</i>     | <i>Mrc1</i>     |                | <i>Mrc1</i>     |                              |               |
| <i>Mrc2</i>     |                 | <i>Mrc2</i>    | <i>Mrc2</i>     |                              |               |
| <i>Mreg</i>     |                 | <i>Mreg</i>    | <i>Mreg</i>     |                              |               |
| <i>Mrfap1</i>   |                 | <i>Mrfap1</i>  |                 |                              |               |
| <i>Mrgbp</i>    | <i>Mrgbp</i>    |                |                 |                              |               |
| <i>Mrgpra1</i>  |                 |                | <i>Mrgpra1</i>  |                              |               |
| <i>Mrgpra3</i>  |                 |                | <i>Mrgpra3</i>  |                              |               |
| <i>Mrgpra6</i>  |                 | <i>Mrgpra6</i> |                 |                              |               |
| <i>Mrgprb2</i>  |                 |                | <i>Mrgprb2</i>  |                              |               |
| <i>Mrgprb3</i>  |                 | <i>Mrgprb3</i> |                 |                              |               |
| <i>Mrgprb5</i>  | <i>Mrgprb5</i>  | <i>Mrgprb5</i> |                 |                              |               |
| <i>Mrgprb8</i>  |                 | <i>Mrgprb8</i> |                 |                              |               |
| <i>Mrgprd</i>   |                 |                | <i>Mrgprd</i>   |                              |               |
| <i>Mrgprx1</i>  |                 | <i>Mrgprx1</i> |                 |                              |               |
| <i>Mrm1</i>     |                 | <i>Mrm1</i>    |                 |                              |               |
| <i>Mroh1</i>    | <i>Mroh1</i>    |                | <i>Mroh1</i>    |                              |               |
| <i>Mroh5</i>    |                 | <i>Mroh5</i>   |                 |                              |               |
| <i>Mroh7</i>    |                 |                | <i>Mroh7</i>    |                              |               |
| <i>Mrpl10</i>   | <i>Mrpl10</i>   | <i>Mrpl10</i>  | <i>Mrpl10</i>   |                              |               |
| <i>Mrpl11</i>   |                 | <i>Mrpl11</i>  |                 |                              |               |
| <i>Mrpl14</i>   | <i>Mrpl14</i>   | <i>Mrpl14</i>  | <i>Mrpl14</i>   |                              |               |
| <i>Mrpl15</i>   | <i>Mrpl15</i>   | <i>Mrpl15</i>  | <i>Mrpl15</i>   |                              |               |
| <i>Mrpl17</i>   |                 |                | <i>Mrpl17</i>   |                              | <i>Mrpl17</i> |
| <i>Mrpl18</i>   | <i>Mrpl18</i>   |                | <i>Mrpl18</i>   |                              |               |
| <i>Mrpl19</i>   |                 |                | <i>Mrpl19</i>   |                              | <i>Mrpl19</i> |
| <i>Mrpl2</i>    | <i>Mrpl2</i>    |                | <i>Mrpl2</i>    |                              |               |
| <i>Mrpl22</i>   |                 | <i>Mrpl22</i>  | <i>Mrpl22</i>   |                              |               |
| <i>Mrpl27</i>   |                 | <i>Mrpl27</i>  | <i>Mrpl27</i>   |                              |               |

Suppl. Table 1  
(128/234)

|                | CHIP-Seq hits |         |         | Unique hits with interactors |        |
|----------------|---------------|---------|---------|------------------------------|--------|
|                | unstimulated  | Ac      | LPS     | Ac                           | LPS    |
| <i>Mrpl28</i>  |               | Mrpl28  |         |                              |        |
| <i>Mrpl3</i>   |               | Mrpl3   |         |                              |        |
| <i>Mrpl36</i>  |               |         | Mrpl36  |                              |        |
| <i>Mrpl37</i>  |               |         | Mrpl37  |                              |        |
| <i>Mrpl38</i>  | Mrpl38        |         |         |                              |        |
| <i>Mrpl40</i>  |               | Mrpl40  |         | Mrpl40                       |        |
| <i>Mrpl42</i>  |               |         | Mrpl42  |                              |        |
| <i>Mrpl43</i>  |               | Mrpl43  |         |                              |        |
| <i>Mrpl46</i>  |               |         | Mrpl46  |                              |        |
| <i>Mrpl47</i>  |               |         | Mrpl47  |                              |        |
| <i>Mrpl52</i>  | Mrpl52        | Mrpl52  | Mrpl52  |                              |        |
| <i>Mrpl55</i>  |               |         | Mrpl55  |                              |        |
| <i>Mrpl9</i>   | Mrpl9         | Mrpl9   | Mrpl9   |                              |        |
| <i>Mrps12</i>  |               |         | Mrps12  |                              |        |
| <i>Mrps16</i>  |               |         | Mrps16  |                              |        |
| <i>Mrps17</i>  |               | Mrps17  |         |                              |        |
| <i>Mrps18a</i> | Mrps18a       | Mrps18a |         |                              |        |
| <i>Mrps18b</i> |               | Mrps18b | Mrps18b |                              |        |
| <i>Mrps2</i>   |               |         | Mrps2   |                              |        |
| <i>Mrps22</i>  |               |         | Mrps22  |                              |        |
| <i>Mrps23</i>  |               | Mrps23  |         |                              |        |
| <i>Mrps24</i>  | Mrps24        | Mrps24  | Mrps24  |                              |        |
| <i>Mrps25</i>  |               |         | Mrps25  |                              |        |
| <i>Mrps28</i>  |               |         | Mrps28  |                              |        |
| <i>Mrps30</i>  |               |         | Mrps30  |                              |        |
| <i>Mrps33</i>  | Mrps33        | Mrps33  | Mrps33  |                              |        |
| <i>Mrps35</i>  |               | Mrps35  |         |                              |        |
| <i>Mrps36</i>  |               | Mrps36  |         |                              |        |
| <i>Mrps5</i>   |               |         | Mrps5   |                              |        |
| <i>Mrps6</i>   | Mrps6         | Mrps6   | Mrps6   |                              |        |
| <i>Mrrf</i>    |               |         | Mrrf    |                              |        |
| <i>Mrs2</i>    |               | Mrs2    |         |                              |        |
| <i>Mrvi1</i>   |               | Mrvi1   |         |                              |        |
| <i>Ms4a10</i>  | Ms4a10        |         |         |                              |        |
| <i>Ms4a13</i>  |               |         | Ms4a13  |                              |        |
| <i>Ms4a15</i>  |               | Ms4a15  |         |                              |        |
| <i>Ms4a18</i>  | Ms4a18        |         | Ms4a18  |                              |        |
| <i>Ms4a2</i>   |               | Ms4a2   | Ms4a2   |                              |        |
| <i>Ms4a4b</i>  |               |         | Ms4a4b  |                              |        |
| <i>Ms4a4c</i>  |               |         | Ms4a4c  |                              | Ms4a4c |
| <i>Ms4a6c</i>  | Ms4a6c        |         |         |                              |        |
| <i>Ms4a8a</i>  | Ms4a8a        | Ms4a8a  | Ms4a8a  |                              |        |
| <i>Msantd3</i> |               |         | Msantd3 |                              |        |
| <i>Msc</i>     |               | Msc     |         |                              |        |
| <i>Msgn1</i>   |               |         | Msgn1   |                              | Msgn1  |
| <i>Msh2</i>    |               | Msh2    |         |                              |        |
| <i>Msh4</i>    |               | Msh4    | Msh4    |                              |        |
| <i>Msh6</i>    |               |         | Msh6    |                              |        |
| <i>Msl2</i>    |               |         | Msl2    |                              |        |



Suppl. Table 1  
(129/234)

|                | ChIP-Seq hits |                |                | Unique hits with interactors |               |
|----------------|---------------|----------------|----------------|------------------------------|---------------|
|                | unstimulated  | Ac             | LPS            | Ac                           | LPS           |
| <i>Msl3l2</i>  |               |                | <i>Msl3l2</i>  |                              |               |
| <i>Msln</i>    |               | <i>Msln</i>    |                |                              |               |
| <i>Msemb</i>   | <i>Msemb</i>  |                | <i>Msemb</i>   |                              |               |
| <i>Msmo1</i>   | <i>Msmo1</i>  |                |                |                              |               |
| <i>Msr1</i>    | <i>Msr1</i>   |                |                |                              |               |
| <i>Msra</i>    | <i>Msra</i>   |                | <i>Msra</i>    |                              |               |
| <i>Msrb1</i>   |               |                | <i>Msrb1</i>   |                              |               |
| <i>Msrb2</i>   |               | <i>Msrb2</i>   |                |                              |               |
| <i>Msrb3</i>   |               | <i>Msrb3</i>   | <i>Msrb3</i>   |                              |               |
| <i>Mss51</i>   |               | <i>Mss51</i>   |                |                              |               |
| <i>Mst1r</i>   | <i>Mst1r</i>  |                |                |                              |               |
| <i>Mt1</i>     | <i>Mt1</i>    |                |                |                              |               |
| <i>Mt2</i>     |               |                | <i>Mt2</i>     |                              |               |
| <i>Mt4</i>     |               |                | <i>Mt4</i>     |                              |               |
| <i>Mta2</i>    |               |                | <i>Mta2</i>    |                              |               |
| <i>Mta3</i>    | <i>Mta3</i>   | <i>Mta3</i>    | <i>Mta3</i>    |                              |               |
| <i>Mtap</i>    | <i>Mtap</i>   |                |                |                              |               |
| <i>Mtap7d3</i> |               |                | <i>Mtap7d3</i> |                              |               |
| <i>Mtch2</i>   |               |                | <i>Mtch2</i>   |                              | <i>Mtch2</i>  |
| <i>Mtdh</i>    |               |                | <i>Mtdh</i>    |                              | <i>Mtdh</i>   |
| <i>Mterf4</i>  |               | <i>Mterf4</i>  |                |                              |               |
| <i>Mtf2</i>    |               | <i>Mtf2</i>    |                | <i>Mtf2</i>                  |               |
| <i>Mtg1</i>    |               | <i>Mtg1</i>    | <i>Mtg1</i>    |                              |               |
| <i>Mthfd2</i>  | <i>Mthfd2</i> |                | <i>Mthfd2</i>  |                              |               |
| <i>Mthfd2l</i> |               | <i>Mthfd2l</i> |                |                              |               |
| <i>Mthfr</i>   | <i>Mthfr</i>  | <i>Mthfr</i>   |                |                              |               |
| <i>Mtif2</i>   | <i>Mtif2</i>  | <i>Mtif2</i>   |                |                              |               |
| <i>Mtif3</i>   |               |                | <i>Mtif3</i>   |                              |               |
| <i>Mtm1</i>    |               |                | <i>Mtm1</i>    |                              |               |
| <i>Mtmr10</i>  | <i>Mtmr10</i> |                | <i>Mtmr10</i>  |                              |               |
| <i>Mtmr12</i>  |               |                | <i>Mtmr12</i>  |                              | <i>Mtmr12</i> |
| <i>Mtmr2</i>   |               | <i>Mtmr2</i>   | <i>Mtmr2</i>   |                              |               |
| <i>Mtmr3</i>   | <i>Mtmr3</i>  |                | <i>Mtmr3</i>   |                              |               |
| <i>Mtmr6</i>   | <i>Mtmr6</i>  | <i>Mtmr6</i>   | <i>Mtmr6</i>   |                              |               |
| <i>Mtmr7</i>   |               |                | <i>Mtmr7</i>   |                              |               |
| <i>Mtmr9</i>   | <i>Mtmr9</i>  | <i>Mtmr9</i>   | <i>Mtmr9</i>   |                              |               |
| <i>Mtnr1b</i>  |               |                | <i>Mtnr1b</i>  |                              |               |
| <i>Mtpap</i>   |               | <i>Mtpap</i>   |                |                              |               |
| <i>Mtr</i>     |               | <i>Mtr</i>     |                |                              |               |
| <i>Mtrf1</i>   | <i>Mtrf1</i>  |                |                |                              |               |
| <i>Mtrf1l</i>  |               | <i>Mtrf1l</i>  |                |                              |               |
| <i>Mtrr</i>    |               | <i>Mtrr</i>    |                |                              |               |
| <i>Mturn</i>   | <i>Mturn</i>  |                | <i>Mturn</i>   |                              |               |
| <i>Mtus1</i>   |               | <i>Mtus1</i>   | <i>Mtus1</i>   |                              |               |
| <i>Mtus2</i>   |               |                | <i>Mtus2</i>   |                              |               |
| <i>Mtx1</i>    | <i>Mtx1</i>   | <i>Mtx1</i>    | <i>Mtx1</i>    |                              |               |
| <i>Mtx2</i>    | <i>Mtx2</i>   |                |                |                              |               |
| <i>Mtx3</i>    | <i>Mtx3</i>   |                |                |                              |               |
| <i>Muc1</i>    |               | <i>Muc1</i>    |                |                              |               |

Suppl. Table 1  
(130/234)

|                | ChIP-Seq hits |         |         | Unique hits with interactors |       |
|----------------|---------------|---------|---------|------------------------------|-------|
|                | unstimulated  | Ac      | LPS     | Ac                           | LPS   |
| <i>Muc13</i>   |               | Muc13   |         |                              |       |
| <i>Muc19</i>   |               | Muc19   |         |                              |       |
| <i>Muc2</i>    |               | Muc2    |         |                              |       |
| <i>Muc20</i>   |               |         | Muc20   |                              |       |
| <i>Muc6</i>    | Muc6          |         | Muc6    |                              |       |
| <i>Mug-ps1</i> |               |         | Mug-ps1 |                              |       |
| <i>Mum1l1</i>  |               | Mum1l1  |         |                              |       |
| <i>Munc</i>    |               | Munc    |         |                              |       |
| <i>Mup1</i>    |               |         | Mup1    |                              |       |
| <i>Mup10</i>   |               |         | Mup10   |                              | Mup10 |
| <i>Mup11</i>   |               | Mup11   |         |                              |       |
| <i>Mup12</i>   | Mup12         |         | Mup12   |                              |       |
| <i>Mup13</i>   |               | Mup13   |         | Mup13                        |       |
| <i>Mup14</i>   |               |         | Mup14   |                              | Mup14 |
| <i>Mup15</i>   | Mup15         |         |         |                              |       |
| <i>Mup17</i>   | Mup17         |         |         |                              |       |
| <i>Mup19</i>   |               | Mup19   |         |                              |       |
| <i>Mup2</i>    | Mup2          | Mup2    |         |                              |       |
| <i>Mup20</i>   |               |         | Mup20   |                              |       |
| <i>Mup3</i>    |               |         | Mup3    |                              |       |
| <i>Mup4</i>    |               |         | Mup4    |                              |       |
| <i>Mup5</i>    |               | Mup5    | Mup5    |                              |       |
| <i>Mup8</i>    |               | Mup8    | Mup8    |                              |       |
| <i>Mup9</i>    | Mup9          | Mup9    | Mup9    |                              |       |
| <i>Murc</i>    | Murc          |         |         |                              |       |
| <i>Musk</i>    | Musk          | Musk    | Musk    |                              |       |
| <i>Mustn1</i>  | Mustn1        | Mustn1  | Mustn1  |                              |       |
| <i>Mutyh</i>   |               |         | Mutyh   |                              |       |
| <i>Mvk</i>     |               | Mvk     | Mvk     |                              |       |
| <i>Mx1</i>     |               | Mx1     | Mx1     |                              |       |
| <i>Mxd4</i>    | Mxd4          | Mxd4    |         |                              |       |
| <i>Mxi1</i>    |               | Mxi1    |         | Mxi1                         |       |
| <i>Mxra7</i>   | Mxra7         | Mxra7   | Mxra7   |                              |       |
| <i>Mxra8</i>   |               | Mxra8   | Mxra8   |                              |       |
| <i>Myadml2</i> |               | Myadml2 | Myadml2 |                              |       |
| <i>Myb</i>     |               | Myb     |         | Myb                          |       |
| <i>Mybbp1a</i> |               |         | Mybbp1a |                              |       |
| <i>Mybl1</i>   |               |         | Mybl1   |                              |       |
| <i>Mybpc1</i>  |               |         | Mybpc1  |                              |       |
| <i>Mybpc2</i>  |               | Mybpc2  |         |                              |       |
| <i>Mybphl</i>  |               | Mybphl  |         |                              |       |
| <i>Myc</i>     |               |         | Myc     |                              | Myc   |
| <i>Mycbp</i>   |               |         | Mycbp   |                              | Mycbp |
| <i>Mycbp2</i>  |               |         | Mycbp2  |                              |       |
| <i>Mycl</i>    | Mycl          |         |         |                              |       |
| <i>Mycn</i>    |               | Mycn    |         |                              |       |
| <i>Myd88</i>   |               | Myd88   |         | Myd88                        |       |
| <i>Myeov2</i>  |               |         | Myeov2  |                              |       |
| <i>Myg1</i>    | Myg1          | Myg1    | Myg1    |                              |       |

Suppl. Table 1  
(131/234)

|                | ChIP-Seq hits |               |                | Unique hits with interactors |                |
|----------------|---------------|---------------|----------------|------------------------------|----------------|
|                | unstimulated  | Ac            | LPS            | Ac                           | LPS            |
| <i>Myh1</i>    |               |               | <i>Myh1</i>    |                              |                |
| <i>Myh13</i>   |               | <i>Myh13</i>  |                |                              |                |
| <i>Myh2</i>    |               | <i>Myh2</i>   | <i>Myh2</i>    |                              |                |
| <i>Myh7</i>    |               | <i>Myh7</i>   |                |                              |                |
| <i>Myh7b</i>   | <i>Myh7b</i>  |               |                |                              |                |
| <i>Myh9</i>    |               | <i>Myh9</i>   |                |                              |                |
| <i>Myl1</i>    |               |               | <i>Myl1</i>    |                              |                |
| <i>Myl12a</i>  | <i>Myl12a</i> | <i>Myl12a</i> |                |                              |                |
| <i>Myl2</i>    |               | <i>Myl2</i>   | <i>Myl2</i>    |                              |                |
| <i>Myl3</i>    |               |               | <i>Myl3</i>    |                              |                |
| <i>Myl4</i>    |               |               | <i>Myl4</i>    |                              |                |
| <i>Myl6</i>    |               | <i>Myl6</i>   | <i>Myl6</i>    |                              |                |
| <i>Myl6b</i>   |               | <i>Myl6b</i>  |                | <i>Myl6b</i>                 |                |
| <i>Mylk3</i>   | <i>Mylk3</i>  |               |                |                              |                |
| <i>Mynn</i>    |               |               | <i>Mynn</i>    |                              |                |
| <i>Myo10</i>   | <i>Myo10</i>  | <i>Myo10</i>  | <i>Myo10</i>   |                              |                |
| <i>Myo15</i>   | <i>Myo15</i>  | <i>Myo15</i>  | <i>Myo15</i>   |                              |                |
| <i>Myo18b</i>  |               | <i>Myo18b</i> |                |                              |                |
| <i>Myo1b</i>   | <i>Myo1b</i>  |               |                |                              |                |
| <i>Myo1g</i>   |               |               | <i>Myo1g</i>   |                              |                |
| <i>Myo1h</i>   |               |               | <i>Myo1h</i>   |                              |                |
| <i>Myo3b</i>   | <i>Myo3b</i>  |               |                |                              |                |
| <i>Myo5a</i>   |               | <i>Myo5a</i>  |                | <i>Myo5a</i>                 |                |
| <i>Myo5c</i>   | <i>Myo5c</i>  | <i>Myo5c</i>  |                |                              |                |
| <i>Myo6</i>    | <i>Myo6</i>   | <i>Myo6</i>   |                |                              |                |
| <i>Myo7a</i>   |               | <i>Myo7a</i>  |                |                              |                |
| <i>Myo9a</i>   | <i>Myo9a</i>  | <i>Myo9a</i>  | <i>Myo9a</i>   |                              |                |
| <i>Myo9b</i>   | <i>Myo9b</i>  | <i>Myo9b</i>  | <i>Myo9b</i>   |                              |                |
| <i>Myocd</i>   |               | <i>Myocd</i>  | <i>Myocd</i>   |                              |                |
| <i>Myod1</i>   |               | <i>Myod1</i>  |                | <i>Myod1</i>                 |                |
| <i>Myog</i>    |               | <i>Myog</i>   |                | <i>Myog</i>                  |                |
| <i>Myom1</i>   | <i>Myom1</i>  |               |                |                              |                |
| <i>Myom3</i>   |               |               | <i>Myom3</i>   |                              |                |
| <i>Myot</i>    | <i>Myot</i>   | <i>Myot</i>   |                |                              |                |
| <i>Myoz1</i>   |               | <i>Myoz1</i>  |                |                              |                |
| <i>Myoz2</i>   | <i>Myoz2</i>  | <i>Myoz2</i>  |                |                              |                |
| <i>Myoz3</i>   | <i>Myoz3</i>  |               |                |                              |                |
| <i>Mypop</i>   |               | <i>Mypop</i>  |                |                              |                |
| <i>Myrfl</i>   | <i>Myrfl</i>  | <i>Myrfl</i>  | <i>Myrfl</i>   |                              |                |
| <i>Myrip</i>   |               |               | <i>Myrip</i>   |                              | <i>Myrip</i>   |
| <i>Myt1</i>    |               | <i>Myt1</i>   |                |                              |                |
| <i>Myzap</i>   | <i>Myzap</i>  | <i>Myzap</i>  |                |                              |                |
| <i>Mzf1</i>    |               | <i>Mzf1</i>   | <i>Mzf1</i>    |                              |                |
| <i>N4bp1</i>   |               | <i>N4bp1</i>  | <i>N4bp1</i>   |                              |                |
| <i>N4bp2l2</i> |               |               | <i>N4bp2l2</i> |                              | <i>N4bp2l2</i> |
| <i>N6amt2</i>  |               | <i>N6amt2</i> | <i>N6amt2</i>  |                              |                |
| <i>Naa10</i>   |               | <i>Naa10</i>  | <i>Naa10</i>   |                              |                |
| <i>Naa11</i>   | <i>Naa11</i>  | <i>Naa11</i>  | <i>Naa11</i>   |                              |                |
| <i>Naa20</i>   | <i>Naa20</i>  |               |                |                              |                |

Suppl. Table 1  
(132/234)

|                 | ChIP-Seq hits |          |         | Unique hits with interactors |       |
|-----------------|---------------|----------|---------|------------------------------|-------|
|                 | unstimulated  | Ac       | LPS     | Ac                           | LPS   |
| <i>Naa25</i>    | Naa25         | Naa25    | Naa25   |                              |       |
| <i>Naa35</i>    | Naa35         |          |         |                              |       |
| <i>Naa38</i>    | Naa38         |          | Naa38   |                              |       |
| <i>Naa40</i>    | Naa40         |          |         |                              |       |
| <i>Naa50</i>    | Naa50         | Naa50    | Naa50   |                              |       |
| <i>Naa60</i>    | Naa60         | Naa60    | Naa60   |                              |       |
| <i>Naalad2</i>  | Naalad2       | Naalad2  | Naalad2 |                              |       |
| <i>Naaladl1</i> | Naaladl1      | Naaladl1 |         |                              |       |
| <i>Nab1</i>     | Nab1          | Nab1     |         |                              |       |
| <i>Nabp1</i>    |               |          | Nabp1   |                              |       |
| <i>Nabp2</i>    |               |          | Nabp2   |                              |       |
| <i>Nacad</i>    |               | Nacad    |         |                              |       |
| <i>Nacc1</i>    | Nacc1         |          |         |                              |       |
| <i>Nacc2</i>    |               | Nacc2    |         | Nacc2                        |       |
| <i>Nadk2</i>    | Nadk2         |          |         |                              |       |
| <i>Nadsyn1</i>  |               | Nadsyn1  | Nadsyn1 |                              |       |
| <i>Nae1</i>     |               |          | Nae1    |                              |       |
| <i>Nagk</i>     | Nagk          | Nagk     | Nagk    |                              |       |
| <i>Nagpa</i>    | Nagpa         |          |         |                              |       |
| <i>Nags</i>     |               |          | Nags    |                              |       |
| <i>Naif1</i>    | Naif1         | Naif1    |         |                              |       |
| <i>Nanog</i>    |               |          | Nanog   |                              | Nanog |
| <i>Nanos1</i>   |               | Nanos1   | Nanos1  |                              |       |
| <i>Nanos2</i>   | Nanos2        |          | Nanos2  |                              |       |
| <i>Nanp</i>     | Nanp          |          | Nanp    |                              |       |
| <i>Nans</i>     |               |          | Nans    |                              |       |
| <i>Nap1l1</i>   | Nap1l1        |          |         |                              |       |
| <i>Nap1l4</i>   |               | Nap1l4   |         | Nap1l4                       |       |
| <i>Nap1l5</i>   |               |          | Nap1l5  |                              |       |
| <i>Napg</i>     | Napg          |          |         |                              |       |
| <i>Napsa</i>    | Napsa         | Napsa    |         |                              |       |
| <i>Narf</i>     | Narf          |          |         |                              |       |
| <i>Nasp</i>     |               |          | Nasp    |                              |       |
| <i>Nat10</i>    |               |          | Nat10   |                              |       |
| <i>Nat14</i>    |               | Nat14    |         | Nat14                        |       |
| <i>Nat6</i>     | Nat6          |          | Nat6    |                              |       |
| <i>Nat8</i>     |               |          | Nat8    |                              |       |
| <i>Nat9</i>     |               |          | Nat9    |                              |       |
| <i>Nav1</i>     |               | Nav1     |         | Nav1                         |       |
| <i>Nav3</i>     |               |          | Nav3    |                              |       |
| <i>Nbea</i>     | Nbea          | Nbea     | Nbea    |                              |       |
| <i>Nbeal2</i>   |               | Nbeal2   | Nbeal2  |                              |       |
| <i>Nbl1</i>     | Nbl1          |          |         |                              |       |
| <i>Ncald</i>    |               | Ncald    |         | Ncald                        |       |
| <i>Ncam1</i>    |               |          | Ncam1   |                              | Ncam1 |
| <i>Ncapg</i>    |               | Ncapg    |         |                              |       |
| <i>Ncaph</i>    |               |          | Ncaph   |                              |       |
| <i>Ncaph2</i>   | Ncaph2        | Ncaph2   | Ncaph2  |                              |       |
| <i>Nccrp1</i>   |               | Nccrp1   |         |                              |       |

Suppl. Table 1  
(133/234)

|                | CHIP-Seq hits |         |         | Unique hits with interactors |       |
|----------------|---------------|---------|---------|------------------------------|-------|
|                | unstimulated  | Ac      | LPS     | Ac                           | LPS   |
| <i>Nceh1</i>   | Nceh1         |         | Nceh1   |                              |       |
| <i>Nckap1</i>  | Nckap1        | Nckap1  |         |                              |       |
| <i>Nckap1l</i> |               |         | Nckap1l |                              |       |
| <i>Nckap5l</i> |               | Nckap5l |         |                              |       |
| <i>Ncmap</i>   | Ncmap         | Ncmap   |         |                              |       |
| <i>Ncoa2</i>   |               | Ncoa2   |         |                              |       |
| <i>Ncoa3</i>   |               | Ncoa3   | Ncoa3   |                              |       |
| <i>Ncoa4</i>   | Ncoa4         | Ncoa4   |         |                              |       |
| <i>Ncoa5</i>   |               | Ncoa5   |         |                              |       |
| <i>Ncoa6</i>   |               |         | Ncoa6   |                              |       |
| <i>Ncoa7</i>   | Ncoa7         |         |         |                              |       |
| <i>Ncor2</i>   |               | Ncor2   |         |                              |       |
| <i>Ncstn</i>   |               | Ncstn   | Ncstn   |                              |       |
| <i>Nctc1</i>   |               | Nctc1   |         |                              |       |
| <i>Ndc80</i>   |               | Ndc80   |         |                              |       |
| <i>Ndfip1</i>  |               | Ndfip1  |         |                              |       |
| <i>Ndn12</i>   |               | Ndn12   | Ndn12   |                              |       |
| <i>Ndor1</i>   |               | Ndor1   | Ndor1   |                              |       |
| <i>Ndp</i>     |               |         | Ndp     |                              |       |
| <i>Ndr1</i>    |               |         |         |                              |       |
| <i>Ndr2</i>    |               |         |         |                              |       |
| <i>Ndr3</i>    |               |         |         |                              |       |
| <i>Ndr4</i>    |               |         | Ndr4    |                              |       |
| <i>Ndst3</i>   |               | Ndst3   | Ndst3   |                              |       |
| <i>Nd1</i>     |               | Nd1     | Nd1     |                              |       |
| <i>Nd13</i>    |               | Nd13    | Nd13    |                              |       |
| <i>Nd5</i>     |               |         | Nd5     |                              |       |
| <i>Nd6</i>     |               | Nd6     |         |                              |       |
| <i>Nd7</i>     | Nd7           | Nd7     | Nd7     |                              |       |
| <i>Nd8</i>     |               | Nd8     |         |                              |       |
| <i>Nd9</i>     | Nd9           |         |         |                              |       |
| <i>Ndab1</i>   |               |         | Ndab1   |                              |       |
| <i>Ndaf5</i>   | Ndaf5         |         |         |                              |       |
| <i>Ndaf6</i>   | Ndaf6         | Ndaf6   | Ndaf6   |                              |       |
| <i>Ndaf7</i>   |               |         | Ndaf7   |                              | Ndaf7 |
| <i>Ndab2</i>   |               |         | Ndab2   |                              |       |
| <i>Ndab3</i>   |               | Ndab3   | Ndab3   |                              |       |
| <i>Ndab5</i>   |               | Ndab5   |         |                              |       |
| <i>Ndab6</i>   |               |         | Ndab6   |                              |       |
| <i>Ndab8</i>   |               | Ndab8   |         |                              |       |
| <i>Ndab9</i>   | Ndab9         | Ndab9   | Ndab9   |                              |       |
| <i>Nd2</i>     | Nd2           |         |         |                              |       |
| <i>Nd1</i>     |               |         | Nd1     |                              |       |
| <i>Nd2</i>     | Nd2           | Nd2     | Nd2     |                              |       |
| <i>Nd3</i>     |               | Nd3     | Nd3     |                              |       |
| <i>Ndv1</i>    | Ndv1          | Ndv1    | Ndv1    |                              |       |
| <i>Nbl</i>     | Nbl           | Nbl     | Nbl     |                              |       |
| <i>Ncab3</i>   |               | Ncab3   | Ncab3   |                              |       |
| <i>Nedd8</i>   |               | Nedd8   |         |                              |       |
| <i>Nedd9</i>   |               | Nedd9   | Nedd9   |                              |       |

Suppl. Table 1  
(134/234)

|                 | CHIP-Seq hits   |                |                | Unique hits with interactors |              |
|-----------------|-----------------|----------------|----------------|------------------------------|--------------|
|                 | unstimulated    | Ac             | LPS            | Ac                           | LPS          |
| <i>Nefh</i>     |                 | <i>Nefh</i>    | <i>Nefh</i>    |                              |              |
| <i>Nefl</i>     | <i>Nefl</i>     |                |                |                              |              |
| <i>Nefm</i>     | <i>Nefm</i>     | <i>Nefm</i>    |                |                              |              |
| <i>Negr1</i>    | <i>Negr1</i>    |                |                |                              |              |
| <i>Neil1</i>    |                 | <i>Neil1</i>   |                |                              |              |
| <i>Neil3</i>    |                 |                | <i>Neil3</i>   |                              |              |
| <i>Nek11</i>    |                 | <i>Nek11</i>   | <i>Nek11</i>   |                              |              |
| <i>Nek2</i>     |                 |                | <i>Nek2</i>    |                              |              |
| <i>Nek4</i>     | <i>Nek4</i>     | <i>Nek4</i>    |                |                              |              |
| <i>Nelfe</i>    | <i>Nelfe</i>    |                |                |                              |              |
| <i>Nell1os</i>  |                 | <i>Nell1os</i> |                |                              |              |
| <i>Nemf</i>     | <i>Nemf</i>     | <i>Nemf</i>    | <i>Nemf</i>    |                              |              |
| <i>Nenf</i>     |                 | <i>Nenf</i>    |                |                              |              |
| <i>Nes</i>      |                 |                | <i>Nes</i>     |                              | <i>Nes</i>   |
| <i>Nespas</i>   |                 | <i>Nespas</i>  |                |                              |              |
| <i>Neto2</i>    |                 | <i>Neto2</i>   |                |                              |              |
| <i>Neu1</i>     |                 |                | <i>Neu1</i>    |                              | <i>Neu1</i>  |
| <i>Neu2</i>     | <i>Neu2</i>     |                | <i>Neu2</i>    |                              |              |
| <i>Neu3</i>     |                 | <i>Neu3</i>    |                | <i>Neu3</i>                  |              |
| <i>Neurl2</i>   |                 |                | <i>Neurl2</i>  |                              |              |
| <i>Neurl4</i>   |                 |                | <i>Neurl4</i>  |                              |              |
| <i>Neurod1</i>  |                 | <i>Neurod1</i> |                | <i>Neurod1</i>               |              |
| <i>Neurod2</i>  |                 | <i>Neurod2</i> | <i>Neurod2</i> |                              |              |
| <i>Neurog1</i>  |                 | <i>Neurog1</i> |                |                              |              |
| <i>Neurog2</i>  |                 | <i>Neurog2</i> |                | <i>Neurog2</i>               |              |
| <i>Nf1</i>      |                 |                | <i>Nf1</i>     |                              | <i>Nf1</i>   |
| <i>Nf2</i>      | <i>Nf2</i>      | <i>Nf2</i>     | <i>Nf2</i>     |                              |              |
| <i>Nfam1</i>    |                 | <i>Nfam1</i>   | <i>Nfam1</i>   |                              |              |
| <i>Nfat5</i>    | <i>Nfat5</i>    | <i>Nfat5</i>   | <i>Nfat5</i>   |                              |              |
| <i>Nfatc1</i>   | <i>Nfatc1</i>   |                | <i>Nfatc1</i>  |                              |              |
| <i>Nfatc2</i>   | <i>Nfatc2</i>   | <i>Nfatc2</i>  |                |                              |              |
| <i>Nfatc2ip</i> | <i>Nfatc2ip</i> |                |                |                              |              |
| <i>Nfe2</i>     | <i>Nfe2</i>     | <i>Nfe2</i>    | <i>Nfe2</i>    |                              |              |
| <i>Nfe2l1</i>   | <i>Nfe2l1</i>   | <i>Nfe2l1</i>  | <i>Nfe2l1</i>  |                              |              |
| <i>Nfe2l2</i>   |                 | <i>Nfe2l2</i>  |                | <i>Nfe2l2</i>                |              |
| <i>Nfil3</i>    |                 |                | <i>Nfil3</i>   |                              | <i>Nfil3</i> |
| <i>Nfkb1</i>    | <i>Nfkb1</i>    |                |                |                              |              |
| <i>Nfkb2</i>    |                 | <i>Nfkb2</i>   | <i>Nfkb2</i>   |                              |              |
| <i>Nfkbia</i>   | <i>Nfkbia</i>   | <i>Nfkbia</i>  |                |                              |              |
| <i>Nfkbib</i>   |                 | <i>Nfkbib</i>  | <i>Nfkbib</i>  |                              |              |
| <i>Nfkbiz</i>   |                 | <i>Nfkbiz</i>  | <i>Nfkbiz</i>  |                              |              |
| <i>Nfs1</i>     |                 | <i>Nfs1</i>    |                |                              |              |
| <i>Nfu1</i>     |                 | <i>Nfu1</i>    |                |                              |              |
| <i>Nfx1</i>     | <i>Nfx1</i>     |                | <i>Nfx1</i>    |                              |              |
| <i>Nfxl1</i>    | <i>Nfxl1</i>    | <i>Nfxl1</i>   | <i>Nfxl1</i>   |                              |              |
| <i>Nfya</i>     |                 | <i>Nfya</i>    |                | <i>Nfya</i>                  |              |
| <i>Nfyb</i>     |                 | <i>Nfyb</i>    |                | <i>Nfyb</i>                  |              |
| <i>Nfyc</i>     | <i>Nfyc</i>     |                |                |                              |              |
| <i>Ngb</i>      |                 |                | <i>Ngb</i>     |                              | <i>Ngb</i>   |

Suppl. Table 1  
(135/234)

|                  | CHIP-Seq hits |          |           | Unique hits with interactors |         |
|------------------|---------------|----------|-----------|------------------------------|---------|
|                  | unstimulated  | Ac       | LPS       | Ac                           | LPS     |
| <i>Ngdn</i>      |               |          | Ngdn      |                              |         |
| <i>Ngp</i>       |               | Ngp      |           |                              |         |
| <i>Ngrn</i>      |               |          | Ngrn      |                              |         |
| <i>Nhej1</i>     | Nhej1         |          |           |                              |         |
| <i>Nhlh1</i>     | Nhlh1         |          |           |                              |         |
| <i>Nhlh2</i>     |               | Nhlh2    |           | Nhlh2                        |         |
| <i>Nhlrc2</i>    |               |          | Nhlrc2    |                              | Nhlrc2  |
| <i>Nhlrc3</i>    |               | Nhlrc3   | Nhlrc3    |                              |         |
| <i>Nhp2</i>      |               |          | Nhp2      |                              |         |
| <i>Nhs</i>       |               | Nhs      |           |                              |         |
| <i>Nicn1</i>     |               | Nicn1    | Nicn1     |                              |         |
| <i>Nid2</i>      |               |          | Nid2      |                              |         |
| <i>Nif3l1</i>    |               | Nif3l1   | Nif3l1    |                              |         |
| <i>Nin</i>       |               | Nin      |           |                              |         |
| <i>Ninj1</i>     | Ninj1         |          |           |                              |         |
| <i>Ninj2</i>     | Ninj2         | Ninj2    |           |                              |         |
| <i>Ninl</i>      |               |          | Ninl      |                              |         |
| <i>Nipa1</i>     | Nipa1         |          |           |                              |         |
| <i>Nipa2</i>     |               | Nipa2    | Nipa2     |                              |         |
| <i>Nipal2</i>    | Nipal2        |          | Nipal2    |                              |         |
| <i>Nipal3</i>    |               | Nipal3   | Nipal3    |                              |         |
| <i>Nipsnap1</i>  |               | Nipsnap1 |           |                              |         |
| <i>Nipsnap3a</i> |               |          | Nipsnap3a |                              |         |
| <i>Nipsnap3b</i> | Nipsnap3b     |          |           |                              |         |
| <i>Nisch</i>     | Nisch         |          |           |                              |         |
| <i>Nkain1</i>    |               | Nkain1   | Nkain1    |                              |         |
| <i>Nkapl</i>     |               |          | Nkapl     |                              |         |
| <i>Nkd1</i>      |               |          | Nkd1      |                              |         |
| <i>Nkd2</i>      |               | Nkd2     |           |                              |         |
| <i>Nkiras1</i>   |               |          | Nkiras1   |                              | Nkiras1 |
| <i>Nkx2-4</i>    | Nkx2-4        | Nkx2-4   | Nkx2-4    |                              |         |
| <i>Nkx2-5</i>    | Nkx2-5        | Nkx2-5   |           |                              |         |
| <i>Nkx2-6</i>    |               | Nkx2-6   |           |                              |         |
| <i>Nkx3-2</i>    |               | Nkx3-2   |           |                              |         |
| <i>Nlgn1</i>     |               |          | Nlgn1     |                              |         |
| <i>Nlgn2</i>     |               | Nlgn2    |           |                              |         |
| <i>Nln</i>       |               |          | Nln       |                              | Nln     |
| <i>Nlrc3</i>     |               | Nlrc3    |           |                              |         |
| <i>Nlrc4</i>     |               | Nlrc4    | Nlrc4     |                              |         |
| <i>Nlrc5</i>     |               | Nlrc5    | Nlrc5     |                              |         |
| <i>Nlrp14</i>    |               | Nlrp14   |           |                              |         |
| <i>Nlrp1b</i>    | Nlrp1b        |          |           |                              |         |
| <i>Nlrp2</i>     | Nlrp2         |          |           |                              |         |
| <i>Nlrp4e</i>    |               |          | Nlrp4e    |                              |         |
| <i>Nlrp4f</i>    |               | Nlrp4f   |           |                              |         |
| <i>Nlrp5</i>     |               |          | Nlrp5     |                              |         |
| <i>Nlrp6</i>     |               | Nlrp6    |           |                              |         |
| <i>Nmbr</i>      |               |          | Nmbr      |                              |         |
| <i>Nme2</i>      |               | Nme2     |           |                              |         |

Suppl. Table 1  
(136/234)

|                | CHIP-Seq hits |         |        | Unique hits with interactors |       |
|----------------|---------------|---------|--------|------------------------------|-------|
|                | unstimulated  | Ac      | LPS    | Ac                           | LPS   |
| <i>Nme4</i>    |               |         | Nme4   |                              |       |
| <i>Nmi</i>     |               |         | Nmi    |                              |       |
| <i>Nmnat3</i>  |               | Nmnat3  |        |                              |       |
| <i>Nmrk2</i>   |               |         | Nmrk2  |                              | Nmrk2 |
| <i>Nmt1</i>    |               | Nmt1    | Nmt1   |                              |       |
| <i>Nnat</i>    |               |         | Nnat   |                              |       |
| <i>Nnt</i>     |               | Nnt     |        |                              |       |
| <i>Noa1</i>    |               | Noa1    | Noa1   |                              |       |
| <i>Nob1</i>    |               |         | Nob1   |                              |       |
| <i>Nobox</i>   | Nobox         |         | Nobox  |                              |       |
| <i>Noc2l</i>   |               |         | Noc2l  |                              |       |
| <i>Nod1</i>    |               | Nod1    |        |                              |       |
| <i>Nod2</i>    |               |         | Nod2   |                              |       |
| <i>Nog</i>     | Nog           |         | Nog    |                              |       |
| <i>Nol10</i>   |               | Nol10   | Nol10  |                              |       |
| <i>Nol11</i>   |               | Nol11   | Nol11  |                              |       |
| <i>Nol3</i>    |               | Nol3    |        | Nol3                         |       |
| <i>Nol4</i>    |               | Nol4    |        |                              |       |
| <i>Nol6</i>    |               |         | Nol6   |                              | Nol6  |
| <i>Nol7</i>    |               | Nol7    | Nol7   |                              |       |
| <i>Nol8</i>    |               | Nol8    | Nol8   |                              |       |
| <i>Nol9</i>    |               | Nol9    | Nol9   |                              |       |
| <i>Nolc1</i>   |               |         | Nolc1  |                              |       |
| <i>Nop10</i>   |               |         | Nop10  |                              |       |
| <i>Nop16</i>   | Nop16         |         |        |                              |       |
| <i>Nop2</i>    |               | Nop2    | Nop2   |                              |       |
| <i>Nop58</i>   |               | Nop58   |        |                              |       |
| <i>Nop9</i>    |               |         | Nop9   |                              | Nop9  |
| <i>Nos1ap</i>  |               |         | Nos1ap |                              |       |
| <i>Nos2</i>    |               | Nos2    |        | Nos2                         |       |
| <i>Nos3</i>    |               | Nos3    |        |                              |       |
| <i>Nostrin</i> | Nostrin       |         |        |                              |       |
| <i>Notch3</i>  |               | Notch3  |        |                              |       |
| <i>Notch4</i>  | Notch4        |         |        |                              |       |
| <i>Noto</i>    | Noto          | Noto    | Noto   |                              |       |
| <i>Notum</i>   |               |         | Notum  |                              |       |
| <i>Nov</i>     |               |         | Nov    |                              |       |
| <i>Nova1</i>   | Nova1         | Nova1   | Nova1  |                              |       |
| <i>Nox3</i>    |               |         | Nox3   |                              |       |
| <i>Noxred1</i> | Noxred1       | Noxred1 |        |                              |       |
| <i>Npas4</i>   | Npas4         |         |        |                              |       |
| <i>Npc2</i>    |               |         | Npc2   |                              |       |
| <i>Npcd</i>    |               |         | Npcd   |                              |       |
| <i>Npepps</i>  |               |         | Npepps |                              |       |
| <i>Npffr2</i>  |               | Npffr2  |        |                              |       |
| <i>Nphp1</i>   |               |         | Nphp1  |                              |       |
| <i>Nphp3</i>   |               | Nphp3   |        |                              |       |
| <i>Nphp4</i>   |               | Nphp4   |        |                              |       |
| <i>Npl</i>     |               |         | Npl    |                              |       |



Suppl. Table 1  
(137/234)

|                 | ChIP-Seq hits |              |                 | Unique hits with interactors |               |
|-----------------|---------------|--------------|-----------------|------------------------------|---------------|
|                 | unstimulated  | Ac           | LPS             | Ac                           | LPS           |
| <i>Nploc4</i>   |               |              | <i>Nploc4</i>   |                              | <i>Nploc4</i> |
| <i>Npm2</i>     | <i>Npm2</i>   | <i>Npm2</i>  | <i>Npm2</i>     |                              |               |
| <i>Npm3-ps1</i> |               |              | <i>Npm3-ps1</i> |                              |               |
| <i>Nppc</i>     | <i>Nppc</i>   |              |                 |                              |               |
| <i>Npr3</i>     |               | <i>Npr3</i>  | <i>Npr3</i>     |                              |               |
| <i>Nprl2</i>    |               | <i>Nprl2</i> |                 |                              |               |
| <i>Nptn</i>     |               |              | <i>Nptn</i>     |                              |               |
| <i>Nptx1</i>    |               |              | <i>Nptx1</i>    |                              | <i>Nptx1</i>  |
| <i>Nptxr</i>    |               | <i>Nptxr</i> | <i>Nptxr</i>    |                              |               |
| <i>Npw</i>      | <i>Npw</i>    |              |                 |                              |               |
| <i>Npy2r</i>    |               | <i>Npy2r</i> |                 |                              |               |
| <i>Npy4r</i>    | <i>Npy4r</i>  |              |                 |                              |               |
| <i>Npy5r</i>    | <i>Npy5r</i>  |              |                 |                              |               |
| <i>Npy6r</i>    |               | <i>Npy6r</i> |                 |                              |               |
| <i>Nqo2</i>     | <i>Nqo2</i>   | <i>Nqo2</i>  | <i>Nqo2</i>     |                              |               |
| <i>Nr0b2</i>    | <i>Nr0b2</i>  |              | <i>Nr0b2</i>    |                              |               |
| <i>Nr1i2</i>    |               | <i>Nr1i2</i> |                 |                              |               |
| <i>Nr1i3</i>    |               |              | <i>Nr1i3</i>    |                              |               |
| <i>Nr2c2</i>    |               | <i>Nr2c2</i> | <i>Nr2c2</i>    |                              |               |
| <i>Nr2e3</i>    | <i>Nr2e3</i>  |              |                 |                              |               |
| <i>Nr2f2</i>    |               | <i>Nr2f2</i> | <i>Nr2f2</i>    |                              |               |
| <i>Nr3c1</i>    |               | <i>Nr3c1</i> | <i>Nr3c1</i>    |                              |               |
| <i>Nr3c2</i>    |               |              | <i>Nr3c2</i>    |                              | <i>Nr3c2</i>  |
| <i>Nr4a1</i>    | <i>Nr4a1</i>  |              |                 |                              |               |
| <i>Nr4a3</i>    | <i>Nr4a3</i>  |              |                 |                              |               |
| <i>Nr5a2</i>    |               | <i>Nr5a2</i> | <i>Nr5a2</i>    |                              |               |
| <i>Nradd</i>    |               | <i>Nradd</i> |                 |                              |               |
| <i>Nrap</i>     |               |              | <i>Nrap</i>     |                              |               |
| <i>Nrbf2</i>    |               |              | <i>Nrbf2</i>    |                              |               |
| <i>Nrbp1</i>    |               |              | <i>Nrbp1</i>    |                              |               |
| <i>Nrcam</i>    |               | <i>Nrcam</i> |                 | <i>Nrcam</i>                 |               |
| <i>Nrd1</i>     |               | <i>Nrd1</i>  |                 |                              |               |
| <i>Nrde2</i>    |               |              | <i>Nrde2</i>    |                              |               |
| <i>Nrep</i>     | <i>Nrep</i>   |              | <i>Nrep</i>     |                              |               |
| <i>Nrf1</i>     |               |              | <i>Nrf1</i>     |                              | <i>Nrf1</i>   |
| <i>Nrg2</i>     | <i>Nrg2</i>   |              |                 |                              |               |
| <i>Nrg3</i>     |               |              | <i>Nrg3</i>     |                              | <i>Nrg3</i>   |
| <i>Nrg3os</i>   | <i>Nrg3os</i> |              | <i>Nrg3os</i>   |                              |               |
| <i>Nrg4</i>     | <i>Nrg4</i>   |              | <i>Nrg4</i>     |                              |               |
| <i>Nrip2</i>    |               |              | <i>Nrip2</i>    |                              |               |
| <i>Nrm</i>      |               | <i>Nrm</i>   |                 |                              |               |
| <i>Nrn1</i>     |               |              | <i>Nrn1</i>     |                              |               |
| <i>Nrn1l</i>    |               | <i>Nrn1l</i> |                 |                              |               |
| <i>Nron</i>     |               | <i>Nron</i>  |                 |                              |               |
| <i>Nrp1</i>     |               | <i>Nrp1</i>  |                 | <i>Nrp1</i>                  |               |
| <i>Nrxn1</i>    | <i>Nrxn1</i>  |              |                 |                              |               |
| <i>Nrxn3</i>    |               |              | <i>Nrxn3</i>    |                              |               |
| <i>Nsf</i>      |               | <i>Nsf</i>   |                 |                              |               |
| <i>Nsfl1c</i>   | <i>Nsfl1c</i> |              |                 |                              |               |

Suppl. Table 1  
(138/234)

|                    | CHIP-Seq hits |             |             | Unique hits with interactors |        |
|--------------------|---------------|-------------|-------------|------------------------------|--------|
|                    | unstimulated  | Ac          | LPS         | Ac                           | LPS    |
| <i>Nsmaf</i>       | Nsmaf         |             |             |                              |        |
| <i>Nsmce1</i>      |               | Nsmce1      |             |                              |        |
| <i>Nsmce4a</i>     | Nsmce4a       | Nsmce4a     | Nsmce4a     |                              |        |
| <i>Nsun4</i>       | Nsun4         | Nsun4       | Nsun4       |                              |        |
| <i>Nsun6</i>       |               |             | Nsun6       |                              |        |
| <i>Nt5c</i>        |               |             | Nt5c        |                              |        |
| <i>Nt5c2</i>       | Nt5c2         | Nt5c2       | Nt5c2       |                              |        |
| <i>Nt5c3</i>       |               | Nt5c3       |             |                              |        |
| <i>Nt5dc3</i>      |               | Nt5dc3      |             | Nt5dc3                       |        |
| <i>Ntf3</i>        |               |             | Ntf3        |                              | Ntf3   |
| <i>Ntf5</i>        |               |             | Ntf5        |                              | Ntf5   |
| <i>Ntn1</i>        |               |             | Ntn1        |                              |        |
| <i>Ntpcr</i>       |               | Ntpcr       |             |                              |        |
| <i>Ntrk1</i>       |               | Ntrk1       |             | Ntrk1                        |        |
| <i>Ntrk3</i>       |               |             | Ntrk3       |                              |        |
| <i>Nts</i>         | Nts           | Nts         |             |                              |        |
| <i>Nuak1</i>       | Nuak1         |             |             |                              |        |
| <i>Nub1</i>        | Nub1          |             |             |                              |        |
| <i>Nubp2</i>       |               | Nubp2       |             |                              |        |
| <i>Nudc</i>        | Nudc          |             |             |                              |        |
| <i>Nudt1</i>       |               | Nudt1       |             |                              |        |
| <i>Nudt12</i>      |               | Nudt12      | Nudt12      |                              |        |
| <i>Nudt13</i>      |               |             | Nudt13      |                              |        |
| <i>Nudt14</i>      | Nudt14        | Nudt14      |             |                              |        |
| <i>Nudt15</i>      | Nudt15        |             |             |                              |        |
| <i>Nudt16l1</i>    |               |             | Nudt16l1    |                              |        |
| <i>Nudt17</i>      |               |             | Nudt17      |                              |        |
| <i>Nudt18</i>      | Nudt18        | Nudt18      | Nudt18      |                              |        |
| <i>Nudt19</i>      |               |             | Nudt19      |                              | Nudt19 |
| <i>Nudt21</i>      | Nudt21        |             | Nudt21      |                              |        |
| <i>Nudt3</i>       |               | Nudt3       |             |                              |        |
| <i>Nuf2</i>        |               | Nuf2        |             |                              |        |
| <i>Nufip2</i>      | Nufip2        | Nufip2      | Nufip2      |                              |        |
| <i>Nuggc</i>       |               | Nuggc       | Nuggc       |                              |        |
| <i>Numb</i>        |               | Numb        | Numb        |                              |        |
| <i>Nup107</i>      | Nup107        |             | Nup107      |                              |        |
| <i>Nup153</i>      |               | Nup153      |             |                              |        |
| <i>Nup155</i>      |               | Nup155      |             |                              |        |
| <i>Nup160</i>      |               | Nup160      |             |                              |        |
| <i>Nup188</i>      |               | Nup188      | Nup188      |                              |        |
| <i>Nup205</i>      |               | Nup205      | Nup205      |                              |        |
| <i>Nup210l</i>     | Nup210l       |             |             |                              |        |
| <i>Nup214</i>      |               | Nup214      |             |                              |        |
| <i>Nup35</i>       |               |             | Nup35       |                              | Nup35  |
| <i>Nup43</i>       | Nup43         |             | Nup43       |                              |        |
| <i>Nup50</i>       |               | Nup50       |             |                              |        |
| <i>Nup62</i>       |               | Nup62       |             |                              |        |
| <i>Nup62-il4i1</i> | Nup62-il4i1   | Nup62-il4i1 | Nup62-il4i1 |                              |        |
| <i>Nup85</i>       |               |             | Nup85       |                              |        |

Suppl. Table 1  
(139/234)

|                | CHIP-Seq hits |                |               | Unique hits with interactors |               |
|----------------|---------------|----------------|---------------|------------------------------|---------------|
|                | unstimulated  | Ac             | LPS           | Ac                           | LPS           |
| <i>Nup93</i>   |               |                | <i>Nup93</i>  |                              |               |
| <i>Nupl1</i>   |               | <i>Nupl1</i>   |               |                              |               |
| <i>Nupr1l</i>  | <i>Nupr1l</i> | <i>Nupr1l</i>  | <i>Nupr1l</i> |                              |               |
| <i>Nutf2</i>   |               |                | <i>Nutf2</i>  |                              |               |
| <i>Nutm1</i>   |               | <i>Nutm1</i>   | <i>Nutm1</i>  |                              |               |
| <i>Nxf1</i>    | <i>Nxf1</i>   | <i>Nxf1</i>    | <i>Nxf1</i>   |                              |               |
| <i>Nxf2</i>    |               | <i>Nxf2</i>    |               |                              |               |
| <i>Nxn</i>     |               | <i>Nxn</i>     |               |                              |               |
| <i>Nxnl1</i>   |               |                | <i>Nxnl1</i>  |                              | <i>Nxnl1</i>  |
| <i>Nxpe3</i>   |               | <i>Nxpe3</i>   |               | <i>Nxpe3</i>                 |               |
| <i>Nxpe5</i>   |               | <i>Nxpe5</i>   |               |                              |               |
| <i>Nxph4</i>   |               | <i>Nxph4</i>   | <i>Nxph4</i>  |                              |               |
| <i>Nxt2</i>    |               |                | <i>Nxt2</i>   |                              | <i>Nxt2</i>   |
| <i>Nyx</i>     |               | <i>Nyx</i>     | <i>Nyx</i>    |                              |               |
| <i>Oaf</i>     |               |                | <i>Oaf</i>    |                              |               |
| <i>Oas1a</i>   |               | <i>Oas1a</i>   | <i>Oas1a</i>  |                              |               |
| <i>Oas1b</i>   | <i>Oas1b</i>  | <i>Oas1b</i>   | <i>Oas1b</i>  |                              |               |
| <i>Oas1c</i>   | <i>Oas1c</i>  | <i>Oas1c</i>   | <i>Oas1c</i>  |                              |               |
| <i>Oas1d</i>   |               | <i>Oas1d</i>   |               |                              |               |
| <i>Oas1g</i>   |               | <i>Oas1g</i>   |               |                              |               |
| <i>Oas3</i>    | <i>Oas3</i>   | <i>Oas3</i>    |               |                              |               |
| <i>Oasl1</i>   | <i>Oasl1</i>  | <i>Oasl1</i>   |               |                              |               |
| <i>Oasl2</i>   | <i>Oasl2</i>  |                | <i>Oasl2</i>  |                              |               |
| <i>Oat</i>     | <i>Oat</i>    | <i>Oat</i>     | <i>Oat</i>    |                              |               |
| <i>Oaz2</i>    |               | <i>Oaz2</i>    |               |                              |               |
| <i>Oaz3</i>    | <i>Oaz3</i>   | <i>Oaz3</i>    | <i>Oaz3</i>   |                              |               |
| <i>Obfc1</i>   |               | <i>Obfc1</i>   | <i>Obfc1</i>  |                              |               |
| <i>Obox2</i>   |               | <i>Obox2</i>   |               |                              |               |
| <i>Obox3</i>   | <i>Obox3</i>  |                |               |                              |               |
| <i>Obox5</i>   |               | <i>Obox5</i>   |               |                              |               |
| <i>Obox7</i>   |               | <i>Obox7</i>   |               |                              |               |
| <i>Obp1a</i>   |               | <i>Obp1a</i>   |               |                              |               |
| <i>Obp2a</i>   | <i>Obp2a</i>  |                | <i>Obp2a</i>  |                              |               |
| <i>Obp2b</i>   |               | <i>Obp2b</i>   |               |                              |               |
| <i>Oca2</i>    |               |                | <i>Oca2</i>   |                              |               |
| <i>Ocel1</i>   | <i>Ocel1</i>  |                | <i>Ocel1</i>  |                              |               |
| <i>Ociad1</i>  | <i>Ociad1</i> |                | <i>Ociad1</i> |                              |               |
| <i>Ociad2</i>  |               |                | <i>Ociad2</i> |                              | <i>Ociad2</i> |
| <i>Ocstamp</i> |               | <i>Ocstamp</i> |               |                              |               |
| <i>Odam</i>    |               |                | <i>Odam</i>   |                              |               |
| <i>Odf2</i>    |               | <i>Odf2</i>    |               |                              |               |
| <i>Odf2l</i>   |               | <i>Odf2l</i>   |               |                              |               |
| <i>Odf3b</i>   |               |                | <i>Odf3b</i>  |                              |               |
| <i>Odf3l2</i>  |               | <i>Odf3l2</i>  |               |                              |               |
| <i>Ogfod1</i>  |               |                | <i>Ogfod1</i> |                              | <i>Ogfod1</i> |
| <i>Ogfod3</i>  |               |                | <i>Ogfod3</i> |                              |               |
| <i>Ogg1</i>    |               |                | <i>Ogg1</i>   |                              |               |
| <i>Ogn</i>     |               |                | <i>Ogn</i>    |                              |               |
| <i>Ogt</i>     | <i>Ogt</i>    |                | <i>Ogt</i>    |                              |               |

Suppl. Table 1  
(140/234)

|                    | ChIP-Seq hits      |                    |                 | Unique hits with interactors |              |
|--------------------|--------------------|--------------------|-----------------|------------------------------|--------------|
|                    | unstimulated       | Ac                 | LPS             | Ac                           | LPS          |
| <i>Oip5</i>        |                    | <i>Oip5</i>        | <i>Oip5</i>     |                              |              |
| <i>Oit1</i>        |                    |                    | <i>Oit1</i>     |                              |              |
| <i>Olfm1</i>       | <i>Olfm1</i>       | <i>Olfm1</i>       |                 |                              |              |
| <i>Olfm3</i>       |                    |                    | <i>Olfm3</i>    |                              | <i>Olfm3</i> |
| <i>Olfr100</i>     | <i>Olfr100</i>     | <i>Olfr100</i>     |                 |                              |              |
| <i>Olfr1000</i>    |                    |                    | <i>Olfr1000</i> |                              |              |
| <i>Olfr1002</i>    |                    |                    | <i>Olfr1002</i> |                              |              |
| <i>Olfr1009</i>    |                    | <i>Olfr1009</i>    |                 |                              |              |
| <i>Olfr101</i>     |                    |                    | <i>Olfr101</i>  |                              |              |
| <i>Olfr1016</i>    |                    |                    | <i>Olfr1016</i> |                              |              |
| <i>Olfr1019</i>    |                    | <i>Olfr1019</i>    |                 |                              |              |
| <i>Olfr102</i>     | <i>Olfr102</i>     | <i>Olfr102</i>     |                 |                              |              |
| <i>Olfr1020</i>    |                    | <i>Olfr1020</i>    |                 |                              |              |
| <i>Olfr1022</i>    |                    | <i>Olfr1022</i>    |                 |                              |              |
| <i>Olfr103</i>     |                    |                    | <i>Olfr103</i>  |                              |              |
| <i>Olfr1031</i>    | <i>Olfr1031</i>    |                    | <i>Olfr1031</i> |                              |              |
| <i>Olfr1032</i>    | <i>Olfr1032</i>    |                    |                 |                              |              |
| <i>Olfr1033</i>    |                    | <i>Olfr1033</i>    |                 |                              |              |
| <i>Olfr1036</i>    | <i>Olfr1036</i>    |                    | <i>Olfr1036</i> |                              |              |
| <i>Olfr1038-ps</i> | <i>Olfr1038-ps</i> | <i>Olfr1038-ps</i> |                 |                              |              |
| <i>Olfr1045</i>    |                    | <i>Olfr1045</i>    |                 |                              |              |
| <i>Olfr1046</i>    | <i>Olfr1046</i>    |                    |                 |                              |              |
| <i>Olfr1047</i>    |                    | <i>Olfr1047</i>    |                 |                              |              |
| <i>Olfr1052</i>    |                    | <i>Olfr1052</i>    | <i>Olfr1052</i> |                              |              |
| <i>Olfr1053</i>    |                    |                    | <i>Olfr1053</i> |                              |              |
| <i>Olfr1054</i>    |                    | <i>Olfr1054</i>    | <i>Olfr1054</i> |                              |              |
| <i>Olfr1058</i>    |                    | <i>Olfr1058</i>    |                 |                              |              |
| <i>Olfr1062</i>    | <i>Olfr1062</i>    |                    |                 |                              |              |
| <i>Olfr1065</i>    |                    |                    | <i>Olfr1065</i> |                              |              |
| <i>Olfr1066</i>    | <i>Olfr1066</i>    |                    |                 |                              |              |
| <i>Olfr1076</i>    | <i>Olfr1076</i>    |                    |                 |                              |              |
| <i>Olfr108</i>     |                    | <i>Olfr108</i>     |                 |                              |              |
| <i>Olfr1080</i>    | <i>Olfr1080</i>    | <i>Olfr1080</i>    | <i>Olfr1080</i> |                              |              |
| <i>Olfr1082</i>    | <i>Olfr1082</i>    | <i>Olfr1082</i>    | <i>Olfr1082</i> |                              |              |
| <i>Olfr1085</i>    |                    | <i>Olfr1085</i>    |                 |                              |              |
| <i>Olfr1086</i>    | <i>Olfr1086</i>    |                    |                 |                              |              |
| <i>Olfr1087</i>    |                    |                    | <i>Olfr1087</i> |                              |              |
| <i>Olfr109</i>     | <i>Olfr109</i>     |                    |                 |                              |              |
| <i>Olfr1090</i>    | <i>Olfr1090</i>    |                    | <i>Olfr1090</i> |                              |              |
| <i>Olfr1094</i>    | <i>Olfr1094</i>    |                    |                 |                              |              |
| <i>Olfr1098</i>    |                    |                    | <i>Olfr1098</i> |                              |              |
| <i>Olfr11</i>      |                    |                    | <i>Olfr11</i>   |                              |              |
| <i>Olfr110</i>     | <i>Olfr110</i>     | <i>Olfr110</i>     |                 |                              |              |
| <i>Olfr1106</i>    |                    |                    | <i>Olfr1106</i> |                              |              |
| <i>Olfr1109</i>    |                    |                    | <i>Olfr1109</i> |                              |              |
| <i>Olfr1110</i>    | <i>Olfr1110</i>    |                    |                 |                              |              |
| <i>Olfr1112</i>    |                    | <i>Olfr1112</i>    |                 |                              |              |
| <i>Olfr1113</i>    |                    | <i>Olfr1113</i>    |                 |                              |              |
| <i>Olfr1120</i>    |                    | <i>Olfr1120</i>    |                 |                              |              |

Suppl. Table 1  
(141/234)

|                 | ChIP-Seq hits   |                 |                 | Unique hits with interactors |     |
|-----------------|-----------------|-----------------|-----------------|------------------------------|-----|
|                 | unstimulated    | Ac              | LPS             | Ac                           | LPS |
| <i>Olfr1126</i> |                 | <i>Olfr1126</i> |                 |                              |     |
| <i>Olfr1129</i> |                 |                 | <i>Olfr1129</i> |                              |     |
| <i>Olfr113</i>  |                 | <i>Olfr113</i>  |                 |                              |     |
| <i>Olfr1132</i> |                 |                 | <i>Olfr1132</i> |                              |     |
| <i>Olfr1133</i> | <i>Olfr1133</i> | <i>Olfr1133</i> |                 |                              |     |
| <i>Olfr114</i>  |                 | <i>Olfr114</i>  |                 |                              |     |
| <i>Olfr1140</i> |                 | <i>Olfr1140</i> |                 |                              |     |
| <i>Olfr1141</i> |                 | <i>Olfr1141</i> |                 |                              |     |
| <i>Olfr1145</i> |                 | <i>Olfr1145</i> |                 |                              |     |
| <i>Olfr1153</i> |                 |                 | <i>Olfr1153</i> |                              |     |
| <i>Olfr1155</i> |                 | <i>Olfr1155</i> |                 |                              |     |
| <i>Olfr1156</i> |                 |                 | <i>Olfr1156</i> |                              |     |
| <i>Olfr1163</i> |                 | <i>Olfr1163</i> | <i>Olfr1163</i> |                              |     |
| <i>Olfr1164</i> |                 | <i>Olfr1164</i> | <i>Olfr1164</i> |                              |     |
| <i>Olfr1167</i> | <i>Olfr1167</i> |                 |                 |                              |     |
| <i>Olfr1168</i> | <i>Olfr1168</i> | <i>Olfr1168</i> |                 |                              |     |
| <i>Olfr117</i>  |                 | <i>Olfr117</i>  |                 |                              |     |
| <i>Olfr1170</i> | <i>Olfr1170</i> |                 |                 |                              |     |
| <i>Olfr1176</i> | <i>Olfr1176</i> |                 |                 |                              |     |
| <i>Olfr1179</i> | <i>Olfr1179</i> | <i>Olfr1179</i> |                 |                              |     |
| <i>Olfr1180</i> | <i>Olfr1180</i> |                 |                 |                              |     |
| <i>Olfr1181</i> | <i>Olfr1181</i> |                 | <i>Olfr1181</i> |                              |     |
| <i>Olfr1184</i> |                 | <i>Olfr1184</i> |                 |                              |     |
| <i>Olfr1196</i> |                 |                 | <i>Olfr1196</i> |                              |     |
| <i>Olfr120</i>  | <i>Olfr120</i>  | <i>Olfr120</i>  |                 |                              |     |
| <i>Olfr1200</i> |                 | <i>Olfr1200</i> |                 |                              |     |
| <i>Olfr121</i>  |                 | <i>Olfr121</i>  |                 |                              |     |
| <i>Olfr1213</i> | <i>Olfr1213</i> |                 |                 |                              |     |
| <i>Olfr1214</i> | <i>Olfr1214</i> |                 |                 |                              |     |
| <i>Olfr1217</i> | <i>Olfr1217</i> |                 | <i>Olfr1217</i> |                              |     |
| <i>Olfr1221</i> |                 | <i>Olfr1221</i> |                 |                              |     |
| <i>Olfr1223</i> |                 | <i>Olfr1223</i> |                 |                              |     |
| <i>Olfr1228</i> |                 | <i>Olfr1228</i> |                 |                              |     |
| <i>Olfr123</i>  |                 | <i>Olfr123</i>  |                 |                              |     |
| <i>Olfr1231</i> |                 |                 | <i>Olfr1231</i> |                              |     |
| <i>Olfr1234</i> |                 | <i>Olfr1234</i> |                 |                              |     |
| <i>Olfr1239</i> |                 | <i>Olfr1239</i> |                 |                              |     |
| <i>Olfr1240</i> |                 | <i>Olfr1240</i> |                 |                              |     |
| <i>Olfr1241</i> |                 | <i>Olfr1241</i> |                 |                              |     |
| <i>Olfr1242</i> |                 | <i>Olfr1242</i> |                 |                              |     |
| <i>Olfr1245</i> | <i>Olfr1245</i> |                 |                 |                              |     |
| <i>Olfr1247</i> |                 | <i>Olfr1247</i> |                 |                              |     |
| <i>Olfr1248</i> | <i>Olfr1248</i> |                 |                 |                              |     |
| <i>Olfr1250</i> |                 | <i>Olfr1250</i> |                 |                              |     |
| <i>Olfr1251</i> | <i>Olfr1251</i> |                 |                 |                              |     |
| <i>Olfr1252</i> |                 | <i>Olfr1252</i> |                 |                              |     |
| <i>Olfr1255</i> | <i>Olfr1255</i> |                 | <i>Olfr1255</i> |                              |     |
| <i>Olfr1256</i> | <i>Olfr1256</i> | <i>Olfr1256</i> | <i>Olfr1256</i> |                              |     |
| <i>Olfr1257</i> |                 |                 | <i>Olfr1257</i> |                              |     |

Suppl. Table 1  
(142/234)

|                     | ChIP-Seq hits       |                 |                     | Unique hits with interactors |     |
|---------------------|---------------------|-----------------|---------------------|------------------------------|-----|
|                     | unstimulated        | Ac              | LPS                 | Ac                           | LPS |
| <i>Olfr1258</i>     | <i>Olfr1258</i>     |                 |                     |                              |     |
| <i>Olfr1259</i>     | <i>Olfr1259</i>     |                 | <i>Olfr1259</i>     |                              |     |
| <i>Olfr126</i>      | <i>Olfr126</i>      |                 |                     |                              |     |
| <i>Olfr1261</i>     |                     |                 | <i>Olfr1261</i>     |                              |     |
| <i>Olfr1265</i>     | <i>Olfr1265</i>     |                 | <i>Olfr1265</i>     |                              |     |
| <i>Olfr1269</i>     |                     | <i>Olfr1269</i> |                     |                              |     |
| <i>Olfr127</i>      |                     | <i>Olfr127</i>  | <i>Olfr127</i>      |                              |     |
| <i>Olfr1272</i>     | <i>Olfr1272</i>     | <i>Olfr1272</i> | <i>Olfr1272</i>     |                              |     |
| <i>Olfr1275</i>     |                     | <i>Olfr1275</i> |                     |                              |     |
| <i>Olfr1277</i>     |                     | <i>Olfr1277</i> |                     |                              |     |
| <i>Olfr1278</i>     |                     | <i>Olfr1278</i> |                     |                              |     |
| <i>Olfr1279</i>     |                     | <i>Olfr1279</i> |                     |                              |     |
| <i>Olfr128</i>      |                     | <i>Olfr128</i>  | <i>Olfr128</i>      |                              |     |
| <i>Olfr1283</i>     | <i>Olfr1283</i>     |                 | <i>Olfr1283</i>     |                              |     |
| <i>Olfr1286</i>     |                     | <i>Olfr1286</i> |                     |                              |     |
| <i>Olfr1287</i>     | <i>Olfr1287</i>     | <i>Olfr1287</i> | <i>Olfr1287</i>     |                              |     |
| <i>Olfr1288</i>     |                     | <i>Olfr1288</i> |                     |                              |     |
| <i>Olfr1289</i>     |                     | <i>Olfr1289</i> |                     |                              |     |
| <i>Olfr1297</i>     |                     |                 | <i>Olfr1297</i>     |                              |     |
| <i>Olfr1298</i>     | <i>Olfr1298</i>     |                 |                     |                              |     |
| <i>Olfr1299</i>     |                     |                 | <i>Olfr1299</i>     |                              |     |
| <i>Olfr130</i>      | <i>Olfr130</i>      | <i>Olfr130</i>  |                     |                              |     |
| <i>Olfr1300-ps1</i> |                     |                 | <i>Olfr1300-ps1</i> |                              |     |
| <i>Olfr1302</i>     |                     | <i>Olfr1302</i> | <i>Olfr1302</i>     |                              |     |
| <i>Olfr1303</i>     | <i>Olfr1303</i>     | <i>Olfr1303</i> |                     |                              |     |
| <i>Olfr131</i>      |                     | <i>Olfr131</i>  |                     |                              |     |
| <i>Olfr1312</i>     | <i>Olfr1312</i>     |                 | <i>Olfr1312</i>     |                              |     |
| <i>Olfr1316</i>     |                     |                 | <i>Olfr1316</i>     |                              |     |
| <i>Olfr1328</i>     |                     | <i>Olfr1328</i> |                     |                              |     |
| <i>Olfr1329</i>     |                     |                 | <i>Olfr1329</i>     |                              |     |
| <i>Olfr1330</i>     |                     | <i>Olfr1330</i> |                     |                              |     |
| <i>Olfr1331</i>     |                     |                 | <i>Olfr1331</i>     |                              |     |
| <i>Olfr1337</i>     |                     | <i>Olfr1337</i> | <i>Olfr1337</i>     |                              |     |
| <i>Olfr1338</i>     |                     |                 | <i>Olfr1338</i>     |                              |     |
| <i>Olfr1339</i>     | <i>Olfr1339</i>     |                 |                     |                              |     |
| <i>Olfr1349</i>     |                     | <i>Olfr1349</i> |                     |                              |     |
| <i>Olfr135</i>      | <i>Olfr135</i>      |                 |                     |                              |     |
| <i>Olfr1351</i>     | <i>Olfr1351</i>     | <i>Olfr1351</i> | <i>Olfr1351</i>     |                              |     |
| <i>Olfr1352</i>     | <i>Olfr1352</i>     |                 |                     |                              |     |
| <i>Olfr1353</i>     |                     |                 | <i>Olfr1353</i>     |                              |     |
| <i>Olfr1355</i>     |                     | <i>Olfr1355</i> |                     |                              |     |
| <i>Olfr1359</i>     | <i>Olfr1359</i>     | <i>Olfr1359</i> | <i>Olfr1359</i>     |                              |     |
| <i>Olfr1360</i>     | <i>Olfr1360</i>     | <i>Olfr1360</i> |                     |                              |     |
| <i>Olfr1361</i>     |                     |                 | <i>Olfr1361</i>     |                              |     |
| <i>Olfr1366</i>     | <i>Olfr1366</i>     |                 | <i>Olfr1366</i>     |                              |     |
| <i>Olfr1368</i>     | <i>Olfr1368</i>     | <i>Olfr1368</i> | <i>Olfr1368</i>     |                              |     |
| <i>Olfr137</i>      |                     | <i>Olfr137</i>  |                     |                              |     |
| <i>Olfr1370</i>     |                     | <i>Olfr1370</i> |                     |                              |     |
| <i>Olfr1372-ps1</i> | <i>Olfr1372-ps1</i> |                 |                     |                              |     |

Suppl. Table 1  
(143/234)

|                 | ChIP-Seq hits   |                 |                 | Unique hits with interactors |     |
|-----------------|-----------------|-----------------|-----------------|------------------------------|-----|
|                 | unstimulated    | Ac              | LPS             | Ac                           | LPS |
| <i>Olfr1373</i> |                 | <i>Olfr1373</i> |                 |                              |     |
| <i>Olfr138</i>  |                 |                 | <i>Olfr138</i>  |                              |     |
| <i>Olfr1381</i> |                 | <i>Olfr1381</i> |                 |                              |     |
| <i>Olfr1383</i> |                 | <i>Olfr1383</i> |                 |                              |     |
| <i>Olfr1384</i> |                 |                 | <i>Olfr1384</i> |                              |     |
| <i>Olfr1385</i> |                 | <i>Olfr1385</i> | <i>Olfr1385</i> |                              |     |
| <i>Olfr1390</i> |                 | <i>Olfr1390</i> |                 |                              |     |
| <i>Olfr1392</i> |                 | <i>Olfr1392</i> |                 |                              |     |
| <i>Olfr1396</i> |                 | <i>Olfr1396</i> |                 |                              |     |
| <i>Olfr1404</i> | <i>Olfr1404</i> |                 |                 |                              |     |
| <i>Olfr141</i>  |                 |                 | <i>Olfr141</i>  |                              |     |
| <i>Olfr1411</i> |                 | <i>Olfr1411</i> |                 |                              |     |
| <i>Olfr1414</i> |                 |                 | <i>Olfr1414</i> |                              |     |
| <i>Olfr1415</i> | <i>Olfr1415</i> | <i>Olfr1415</i> | <i>Olfr1415</i> |                              |     |
| <i>Olfr1417</i> |                 | <i>Olfr1417</i> |                 |                              |     |
| <i>Olfr1424</i> | <i>Olfr1424</i> | <i>Olfr1424</i> | <i>Olfr1424</i> |                              |     |
| <i>Olfr1426</i> | <i>Olfr1426</i> | <i>Olfr1426</i> |                 |                              |     |
| <i>Olfr143</i>  | <i>Olfr143</i>  | <i>Olfr143</i>  | <i>Olfr143</i>  |                              |     |
| <i>Olfr1434</i> |                 |                 | <i>Olfr1434</i> |                              |     |
| <i>Olfr1436</i> |                 | <i>Olfr1436</i> |                 |                              |     |
| <i>Olfr1441</i> |                 | <i>Olfr1441</i> |                 |                              |     |
| <i>Olfr1442</i> | <i>Olfr1442</i> |                 |                 |                              |     |
| <i>Olfr1447</i> |                 |                 | <i>Olfr1447</i> |                              |     |
| <i>Olfr1449</i> |                 | <i>Olfr1449</i> |                 |                              |     |
| <i>Olfr145</i>  |                 |                 | <i>Olfr145</i>  |                              |     |
| <i>Olfr1453</i> |                 | <i>Olfr1453</i> |                 |                              |     |
| <i>Olfr146</i>  |                 | <i>Olfr146</i>  |                 |                              |     |
| <i>Olfr1461</i> | <i>Olfr1461</i> |                 |                 |                              |     |
| <i>Olfr1462</i> | <i>Olfr1462</i> |                 |                 |                              |     |
| <i>Olfr1463</i> |                 | <i>Olfr1463</i> | <i>Olfr1463</i> |                              |     |
| <i>Olfr1466</i> | <i>Olfr1466</i> | <i>Olfr1466</i> |                 |                              |     |
| <i>Olfr1467</i> |                 | <i>Olfr1467</i> |                 |                              |     |
| <i>Olfr1474</i> | <i>Olfr1474</i> |                 |                 |                              |     |
| <i>Olfr148</i>  |                 | <i>Olfr148</i>  |                 |                              |     |
| <i>Olfr1489</i> |                 |                 | <i>Olfr1489</i> |                              |     |
| <i>Olfr1496</i> | <i>Olfr1496</i> |                 |                 |                              |     |
| <i>Olfr1497</i> |                 | <i>Olfr1497</i> |                 |                              |     |
| <i>Olfr15</i>   |                 |                 | <i>Olfr15</i>   |                              |     |
| <i>Olfr150</i>  |                 | <i>Olfr150</i>  | <i>Olfr150</i>  |                              |     |
| <i>Olfr1500</i> | <i>Olfr1500</i> |                 |                 |                              |     |
| <i>Olfr1502</i> | <i>Olfr1502</i> |                 |                 |                              |     |
| <i>Olfr1504</i> |                 | <i>Olfr1504</i> |                 |                              |     |
| <i>Olfr1506</i> |                 | <i>Olfr1506</i> |                 |                              |     |
| <i>Olfr1508</i> |                 |                 | <i>Olfr1508</i> |                              |     |
| <i>Olfr1512</i> |                 | <i>Olfr1512</i> |                 |                              |     |
| <i>Olfr153</i>  |                 |                 | <i>Olfr153</i>  |                              |     |
| <i>Olfr1535</i> |                 | <i>Olfr1535</i> |                 |                              |     |
| <i>Olfr1537</i> |                 |                 | <i>Olfr1537</i> |                              |     |
| <i>Olfr156</i>  |                 | <i>Olfr156</i>  |                 |                              |     |

Suppl. Table 1  
(144/234)

|                    | ChIP-Seq hits  |                    |                   | Unique hits with interactors |     |
|--------------------|----------------|--------------------|-------------------|------------------------------|-----|
|                    | unstimulated   | Ac                 | LPS               | Ac                           | LPS |
| <i>Olfr167</i>     |                | <i>Olfr167</i>     |                   |                              |     |
| <i>Olfr176</i>     |                |                    | <i>Olfr176</i>    |                              |     |
| <i>Olfr177</i>     |                |                    | <i>Olfr177</i>    |                              |     |
| <i>Olfr18</i>      |                | <i>Olfr18</i>      |                   |                              |     |
| <i>Olfr180</i>     |                | <i>Olfr180</i>     |                   |                              |     |
| <i>Olfr187</i>     |                |                    | <i>Olfr187</i>    |                              |     |
| <i>Olfr190</i>     | <i>Olfr190</i> | <i>Olfr190</i>     |                   |                              |     |
| <i>Olfr191</i>     | <i>Olfr191</i> |                    |                   |                              |     |
| <i>Olfr194</i>     |                | <i>Olfr194</i>     |                   |                              |     |
| <i>Olfr2</i>       |                | <i>Olfr2</i>       |                   |                              |     |
| <i>Olfr20</i>      |                |                    | <i>Olfr20</i>     |                              |     |
| <i>Olfr202</i>     |                |                    | <i>Olfr202</i>    |                              |     |
| <i>Olfr205</i>     |                | <i>Olfr205</i>     |                   |                              |     |
| <i>Olfr212</i>     |                | <i>Olfr212</i>     |                   |                              |     |
| <i>Olfr214</i>     |                |                    | <i>Olfr214</i>    |                              |     |
| <i>Olfr221</i>     |                |                    | <i>Olfr221</i>    |                              |     |
| <i>Olfr222</i>     |                | <i>Olfr222</i>     |                   |                              |     |
| <i>Olfr223</i>     |                | <i>Olfr223</i>     |                   |                              |     |
| <i>Olfr224</i>     |                |                    | <i>Olfr224</i>    |                              |     |
| <i>Olfr225</i>     |                | <i>Olfr225</i>     | <i>Olfr225</i>    |                              |     |
| <i>Olfr228</i>     |                | <i>Olfr228</i>     | <i>Olfr228</i>    |                              |     |
| <i>Olfr23</i>      |                | <i>Olfr23</i>      |                   |                              |     |
| <i>Olfr237-ps1</i> |                | <i>Olfr237-ps1</i> |                   |                              |     |
| <i>Olfr243</i>     |                | <i>Olfr243</i>     |                   |                              |     |
| <i>Olfr247</i>     |                | <i>Olfr247</i>     |                   |                              |     |
| <i>Olfr248</i>     | <i>Olfr248</i> | <i>Olfr248</i>     | <i>Olfr248</i>    |                              |     |
| <i>Olfr25</i>      |                | <i>Olfr25</i>      |                   |                              |     |
| <i>Olfr259</i>     | <i>Olfr259</i> | <i>Olfr259</i>     |                   |                              |     |
| <i>Olfr26</i>      |                | <i>Olfr26</i>      |                   |                              |     |
| <i>Olfr262</i>     |                |                    | <i>Olfr262</i>    |                              |     |
| <i>Olfr263</i>     |                | <i>Olfr263</i>     |                   |                              |     |
| <i>Olfr281</i>     |                |                    | <i>Olfr281</i>    |                              |     |
| <i>Olfr286</i>     | <i>Olfr286</i> |                    |                   |                              |     |
| <i>Olfr287</i>     | <i>Olfr287</i> |                    | <i>Olfr287</i>    |                              |     |
| <i>Olfr288</i>     |                |                    | <i>Olfr288</i>    |                              |     |
| <i>Olfr291</i>     |                | <i>Olfr291</i>     |                   |                              |     |
| <i>Olfr292</i>     | <i>Olfr292</i> |                    |                   |                              |     |
| <i>Olfr294</i>     |                | <i>Olfr294</i>     | <i>Olfr294</i>    |                              |     |
| <i>Olfr297</i>     |                |                    | <i>Olfr297</i>    |                              |     |
| <i>Olfr299</i>     |                |                    | <i>Olfr299</i>    |                              |     |
| <i>Olfr29-ps1</i>  |                |                    | <i>Olfr29-ps1</i> |                              |     |
| <i>Olfr3</i>       |                | <i>Olfr3</i>       |                   |                              |     |
| <i>Olfr30</i>      | <i>Olfr30</i>  | <i>Olfr30</i>      | <i>Olfr30</i>     |                              |     |
| <i>Olfr301</i>     |                | <i>Olfr301</i>     |                   |                              |     |
| <i>Olfr305</i>     |                | <i>Olfr305</i>     |                   |                              |     |
| <i>Olfr310</i>     |                | <i>Olfr310</i>     | <i>Olfr310</i>    |                              |     |
| <i>Olfr313</i>     |                |                    | <i>Olfr313</i>    |                              |     |
| <i>Olfr315</i>     |                |                    | <i>Olfr315</i>    |                              |     |
| <i>Olfr316</i>     |                |                    | <i>Olfr316</i>    |                              |     |



Suppl. Table 1  
(145/234)

|                    | ChIP-Seq hits  |                   |                    | Unique hits with interactors |     |
|--------------------|----------------|-------------------|--------------------|------------------------------|-----|
|                    | unstimulated   | Ac                | LPS                | Ac                           | LPS |
| <i>Olfr323</i>     |                | <i>Olfr323</i>    |                    |                              |     |
| <i>Olfr340</i>     |                |                   | <i>Olfr340</i>     |                              |     |
| <i>Olfr342</i>     |                | <i>Olfr342</i>    |                    |                              |     |
| <i>Olfr344</i>     |                | <i>Olfr344</i>    |                    |                              |     |
| <i>Olfr347</i>     |                | <i>Olfr347</i>    |                    |                              |     |
| <i>Olfr350</i>     | <i>Olfr350</i> |                   |                    |                              |     |
| <i>Olfr353</i>     |                |                   | <i>Olfr353</i>     |                              |     |
| <i>Olfr365</i>     |                | <i>Olfr365</i>    |                    |                              |     |
| <i>Olfr366</i>     | <i>Olfr366</i> |                   |                    |                              |     |
| <i>Olfr367-ps</i>  |                | <i>Olfr367-ps</i> |                    |                              |     |
| <i>Olfr370</i>     |                | <i>Olfr370</i>    |                    |                              |     |
| <i>Olfr371</i>     |                | <i>Olfr371</i>    |                    |                              |     |
| <i>Olfr38</i>      |                |                   | <i>Olfr38</i>      |                              |     |
| <i>Olfr380</i>     | <i>Olfr380</i> |                   |                    |                              |     |
| <i>Olfr385</i>     |                |                   | <i>Olfr385</i>     |                              |     |
| <i>Olfr389</i>     |                |                   | <i>Olfr389</i>     |                              |     |
| <i>Olfr39</i>      |                |                   | <i>Olfr39</i>      |                              |     |
| <i>Olfr390</i>     | <i>Olfr390</i> | <i>Olfr390</i>    |                    |                              |     |
| <i>Olfr391-ps</i>  |                | <i>Olfr391-ps</i> | <i>Olfr391-ps</i>  |                              |     |
| <i>Olfr394</i>     |                | <i>Olfr394</i>    |                    |                              |     |
| <i>Olfr395</i>     |                | <i>Olfr395</i>    | <i>Olfr395</i>     |                              |     |
| <i>Olfr406</i>     |                | <i>Olfr406</i>    |                    |                              |     |
| <i>Olfr410</i>     |                |                   | <i>Olfr410</i>     |                              |     |
| <i>Olfr414</i>     |                | <i>Olfr414</i>    |                    |                              |     |
| <i>Olfr417</i>     |                | <i>Olfr417</i>    | <i>Olfr417</i>     |                              |     |
| <i>Olfr418</i>     |                |                   | <i>Olfr418</i>     |                              |     |
| <i>Olfr419</i>     |                |                   | <i>Olfr419</i>     |                              |     |
| <i>Olfr421-ps1</i> |                |                   | <i>Olfr421-ps1</i> |                              |     |
| <i>Olfr424</i>     | <i>Olfr424</i> | <i>Olfr424</i>    | <i>Olfr424</i>     |                              |     |
| <i>Olfr426</i>     | <i>Olfr426</i> |                   |                    |                              |     |
| <i>Olfr427</i>     | <i>Olfr427</i> |                   |                    |                              |     |
| <i>Olfr432</i>     |                |                   | <i>Olfr432</i>     |                              |     |
| <i>Olfr433</i>     |                | <i>Olfr433</i>    | <i>Olfr433</i>     |                              |     |
| <i>Olfr434</i>     |                |                   | <i>Olfr434</i>     |                              |     |
| <i>Olfr435</i>     |                | <i>Olfr435</i>    |                    |                              |     |
| <i>Olfr45</i>      | <i>Olfr45</i>  | <i>Olfr45</i>     |                    |                              |     |
| <i>Olfr452</i>     |                | <i>Olfr452</i>    |                    |                              |     |
| <i>Olfr453</i>     |                | <i>Olfr453</i>    |                    |                              |     |
| <i>Olfr459</i>     | <i>Olfr459</i> | <i>Olfr459</i>    |                    |                              |     |
| <i>Olfr46</i>      | <i>Olfr46</i>  |                   |                    |                              |     |
| <i>Olfr460</i>     |                | <i>Olfr460</i>    |                    |                              |     |
| <i>Olfr463</i>     |                |                   | <i>Olfr463</i>     |                              |     |
| <i>Olfr464</i>     |                | <i>Olfr464</i>    |                    |                              |     |
| <i>Olfr467</i>     | <i>Olfr467</i> |                   |                    |                              |     |
| <i>Olfr469</i>     |                |                   | <i>Olfr469</i>     |                              |     |
| <i>Olfr47</i>      |                | <i>Olfr47</i>     |                    |                              |     |
| <i>Olfr478</i>     | <i>Olfr478</i> | <i>Olfr478</i>    |                    |                              |     |
| <i>Olfr479</i>     | <i>Olfr479</i> |                   |                    |                              |     |
| <i>Olfr480</i>     | <i>Olfr480</i> |                   |                    |                              |     |

Suppl. Table 1  
(146/234)

|                | ChIP-Seq hits |         |         | Unique hits with interactors |     |
|----------------|---------------|---------|---------|------------------------------|-----|
|                | unstimulated  | Ac      | LPS     | Ac                           | LPS |
| <i>Olfr482</i> | Olfr482       |         |         |                              |     |
| <i>Olfr483</i> | Olfr483       |         |         |                              |     |
| <i>Olfr485</i> |               | Olfr485 |         |                              |     |
| <i>Olfr486</i> |               | Olfr486 |         |                              |     |
| <i>Olfr492</i> |               | Olfr492 | Olfr492 |                              |     |
| <i>Olfr494</i> |               | Olfr494 |         |                              |     |
| <i>Olfr495</i> |               |         | Olfr495 |                              |     |
| <i>Olfr498</i> |               | Olfr498 |         |                              |     |
| <i>Olfr5</i>   |               | Olfr5   |         |                              |     |
| <i>Olfr50</i>  |               |         | Olfr50  |                              |     |
| <i>Olfr503</i> | Olfr503       | Olfr503 | Olfr503 |                              |     |
| <i>Olfr507</i> | Olfr507       | Olfr507 | Olfr507 |                              |     |
| <i>Olfr51</i>  | Olfr51        |         |         |                              |     |
| <i>Olfr510</i> |               | Olfr510 |         |                              |     |
| <i>Olfr513</i> | Olfr513       | Olfr513 |         |                              |     |
| <i>Olfr518</i> | Olfr518       |         |         |                              |     |
| <i>Olfr521</i> |               | Olfr521 |         |                              |     |
| <i>Olfr524</i> |               | Olfr524 |         |                              |     |
| <i>Olfr527</i> |               | Olfr527 |         |                              |     |
| <i>Olfr531</i> |               |         | Olfr531 |                              |     |
| <i>Olfr533</i> |               |         | Olfr533 |                              |     |
| <i>Olfr539</i> |               | Olfr539 |         |                              |     |
| <i>Olfr543</i> |               | Olfr543 |         |                              |     |
| <i>Olfr547</i> |               | Olfr547 |         |                              |     |
| <i>Olfr55</i>  |               | Olfr55  |         |                              |     |
| <i>Olfr555</i> |               | Olfr555 |         |                              |     |
| <i>Olfr558</i> |               | Olfr558 |         |                              |     |
| <i>Olfr559</i> | Olfr559       |         |         |                              |     |
| <i>Olfr56</i>  |               |         | Olfr56  |                              |     |
| <i>Olfr561</i> | Olfr561       | Olfr561 |         |                              |     |
| <i>Olfr564</i> | Olfr564       | Olfr564 | Olfr564 |                              |     |
| <i>Olfr568</i> | Olfr568       | Olfr568 | Olfr568 |                              |     |
| <i>Olfr572</i> |               | Olfr572 |         |                              |     |
| <i>Olfr574</i> |               | Olfr574 |         |                              |     |
| <i>Olfr576</i> |               |         | Olfr576 |                              |     |
| <i>Olfr585</i> |               |         | Olfr585 |                              |     |
| <i>Olfr586</i> |               | Olfr586 |         |                              |     |
| <i>Olfr59</i>  |               | Olfr59  |         |                              |     |
| <i>Olfr593</i> |               | Olfr593 |         |                              |     |
| <i>Olfr596</i> |               |         | Olfr596 |                              |     |
| <i>Olfr597</i> |               |         | Olfr597 |                              |     |
| <i>Olfr6</i>   | Olfr6         |         |         |                              |     |
| <i>Olfr601</i> |               | Olfr601 | Olfr601 |                              |     |
| <i>Olfr603</i> |               | Olfr603 |         |                              |     |
| <i>Olfr605</i> | Olfr605       |         |         |                              |     |
| <i>Olfr606</i> | Olfr606       |         |         |                              |     |
| <i>Olfr609</i> |               | Olfr609 |         |                              |     |
| <i>Olfr61</i>  |               |         | Olfr61  |                              |     |
| <i>Olfr610</i> |               | Olfr610 |         |                              |     |

Suppl. Table 1  
(147/234)

|                | ChIP-Seq hits  |                |                | Unique hits with interactors |     |
|----------------|----------------|----------------|----------------|------------------------------|-----|
|                | unstimulated   | Ac             | LPS            | Ac                           | LPS |
| <i>Olfr612</i> |                | <i>Olfr612</i> |                |                              |     |
| <i>Olfr613</i> | <i>Olfr613</i> |                |                |                              |     |
| <i>Olfr615</i> |                | <i>Olfr615</i> |                |                              |     |
| <i>Olfr616</i> |                | <i>Olfr616</i> |                |                              |     |
| <i>Olfr618</i> | <i>Olfr618</i> |                |                |                              |     |
| <i>Olfr620</i> |                | <i>Olfr620</i> | <i>Olfr620</i> |                              |     |
| <i>Olfr63</i>  |                | <i>Olfr63</i>  |                |                              |     |
| <i>Olfr630</i> | <i>Olfr630</i> | <i>Olfr630</i> |                | <i>Olfr630</i>               |     |
| <i>Olfr64</i>  | <i>Olfr64</i>  |                |                | <i>Olfr64</i>                |     |
| <i>Olfr640</i> |                |                |                | <i>Olfr640</i>               |     |
| <i>Olfr644</i> |                | <i>Olfr644</i> |                | <i>Olfr644</i>               |     |
| <i>Olfr645</i> |                | <i>Olfr645</i> |                |                              |     |
| <i>Olfr646</i> |                | <i>Olfr646</i> |                |                              |     |
| <i>Olfr65</i>  |                | <i>Olfr65</i>  |                |                              |     |
| <i>Olfr654</i> |                | <i>Olfr654</i> |                |                              |     |
| <i>Olfr659</i> |                | <i>Olfr659</i> |                |                              |     |
| <i>Olfr66</i>  |                |                | <i>Olfr66</i>  |                              |     |
| <i>Olfr661</i> |                | <i>Olfr661</i> |                |                              |     |
| <i>Olfr663</i> |                | <i>Olfr663</i> |                | <i>Olfr663</i>               |     |
| <i>Olfr667</i> |                |                |                | <i>Olfr667</i>               |     |
| <i>Olfr668</i> | <i>Olfr668</i> |                |                |                              |     |
| <i>Olfr67</i>  |                |                | <i>Olfr67</i>  |                              |     |
| <i>Olfr672</i> | <i>Olfr672</i> |                |                |                              |     |
| <i>Olfr675</i> | <i>Olfr675</i> |                |                |                              |     |
| <i>Olfr676</i> | <i>Olfr676</i> |                |                |                              |     |
| <i>Olfr678</i> | <i>Olfr678</i> |                |                | <i>Olfr678</i>               |     |
| <i>Olfr68</i>  | <i>Olfr68</i>  |                |                |                              |     |
| <i>Olfr688</i> |                | <i>Olfr688</i> |                | <i>Olfr688</i>               |     |
| <i>Olfr69</i>  | <i>Olfr69</i>  |                |                |                              |     |
| <i>Olfr692</i> |                | <i>Olfr692</i> |                |                              |     |
| <i>Olfr694</i> |                |                |                | <i>Olfr694</i>               |     |
| <i>Olfr697</i> |                |                |                | <i>Olfr697</i>               |     |
| <i>Olfr698</i> | <i>Olfr698</i> | <i>Olfr698</i> |                | <i>Olfr698</i>               |     |
| <i>Olfr699</i> | <i>Olfr699</i> | <i>Olfr699</i> |                |                              |     |
| <i>Olfr704</i> |                |                |                | <i>Olfr704</i>               |     |
| <i>Olfr706</i> |                | <i>Olfr706</i> |                |                              |     |
| <i>Olfr71</i>  | <i>Olfr71</i>  | <i>Olfr71</i>  |                | <i>Olfr71</i>                |     |
| <i>Olfr710</i> | <i>Olfr710</i> |                |                |                              |     |
| <i>Olfr715</i> | <i>Olfr715</i> |                |                |                              |     |
| <i>Olfr724</i> |                | <i>Olfr724</i> |                | <i>Olfr724</i>               |     |
| <i>Olfr725</i> |                | <i>Olfr725</i> |                |                              |     |
| <i>Olfr726</i> | <i>Olfr726</i> |                |                |                              |     |
| <i>Olfr728</i> |                | <i>Olfr728</i> |                | <i>Olfr728</i>               |     |
| <i>Olfr729</i> |                | <i>Olfr729</i> |                | <i>Olfr729</i>               |     |
| <i>Olfr73</i>  | <i>Olfr73</i>  | <i>Olfr73</i>  |                | <i>Olfr73</i>                |     |
| <i>Olfr732</i> | <i>Olfr732</i> | <i>Olfr732</i> |                | <i>Olfr732</i>               |     |
| <i>Olfr733</i> | <i>Olfr733</i> |                |                |                              |     |
| <i>Olfr734</i> |                |                |                | <i>Olfr734</i>               |     |
| <i>Olfr735</i> |                |                |                | <i>Olfr735</i>               |     |

Suppl. Table 1  
(148/234)

|                    | ChIP-Seq hits  |                |                    | Unique hits with interactors |     |
|--------------------|----------------|----------------|--------------------|------------------------------|-----|
|                    | unstimulated   | Ac             | LPS                | Ac                           | LPS |
| <i>Olfr738</i>     |                | <i>Olfr738</i> |                    |                              |     |
| <i>Olfr739</i>     |                | <i>Olfr739</i> |                    |                              |     |
| <i>Olfr740</i>     |                | <i>Olfr740</i> |                    |                              |     |
| <i>Olfr744</i>     |                |                | <i>Olfr744</i>     |                              |     |
| <i>Olfr746</i>     | <i>Olfr746</i> |                |                    |                              |     |
| <i>Olfr747</i>     |                | <i>Olfr747</i> |                    |                              |     |
| <i>Olfr761</i>     |                | <i>Olfr761</i> |                    |                              |     |
| <i>Olfr77</i>      |                | <i>Olfr77</i>  |                    |                              |     |
| <i>Olfr770</i>     |                | <i>Olfr770</i> |                    |                              |     |
| <i>Olfr771</i>     |                |                | <i>Olfr771</i>     |                              |     |
| <i>Olfr772</i>     |                |                | <i>Olfr772</i>     |                              |     |
| <i>Olfr774</i>     |                |                | <i>Olfr774</i>     |                              |     |
| <i>Olfr775</i>     |                | <i>Olfr775</i> |                    |                              |     |
| <i>Olfr777</i>     |                | <i>Olfr777</i> |                    |                              |     |
| <i>Olfr78</i>      | <i>Olfr78</i>  |                |                    |                              |     |
| <i>Olfr785</i>     |                | <i>Olfr785</i> |                    |                              |     |
| <i>Olfr790</i>     |                |                | <i>Olfr790</i>     |                              |     |
| <i>Olfr792</i>     |                | <i>Olfr792</i> |                    |                              |     |
| <i>Olfr794</i>     | <i>Olfr794</i> |                |                    |                              |     |
| <i>Olfr798</i>     | <i>Olfr798</i> |                |                    |                              |     |
| <i>Olfr801</i>     | <i>Olfr801</i> |                |                    |                              |     |
| <i>Olfr804</i>     | <i>Olfr804</i> |                |                    |                              |     |
| <i>Olfr805</i>     | <i>Olfr805</i> | <i>Olfr805</i> |                    |                              |     |
| <i>Olfr807</i>     |                |                | <i>Olfr807</i>     |                              |     |
| <i>Olfr809</i>     | <i>Olfr809</i> | <i>Olfr809</i> |                    |                              |     |
| <i>Olfr814</i>     |                | <i>Olfr814</i> |                    |                              |     |
| <i>Olfr816</i>     |                |                | <i>Olfr816</i>     |                              |     |
| <i>Olfr818</i>     | <i>Olfr818</i> |                | <i>Olfr818</i>     |                              |     |
| <i>Olfr821</i>     | <i>Olfr821</i> | <i>Olfr821</i> |                    |                              |     |
| <i>Olfr825</i>     |                | <i>Olfr825</i> |                    |                              |     |
| <i>Olfr826</i>     | <i>Olfr826</i> |                |                    |                              |     |
| <i>Olfr830</i>     |                | <i>Olfr830</i> |                    |                              |     |
| <i>Olfr835</i>     |                | <i>Olfr835</i> |                    |                              |     |
| <i>Olfr843</i>     |                |                | <i>Olfr843</i>     |                              |     |
| <i>Olfr846</i>     | <i>Olfr846</i> |                |                    |                              |     |
| <i>Olfr847</i>     |                | <i>Olfr847</i> |                    |                              |     |
| <i>Olfr850</i>     | <i>Olfr850</i> | <i>Olfr850</i> | <i>Olfr850</i>     |                              |     |
| <i>Olfr855</i>     | <i>Olfr855</i> | <i>Olfr855</i> | <i>Olfr855</i>     |                              |     |
| <i>Olfr856-ps1</i> |                |                | <i>Olfr856-ps1</i> |                              |     |
| <i>Olfr857</i>     |                | <i>Olfr857</i> |                    |                              |     |
| <i>Olfr859</i>     |                |                | <i>Olfr859</i>     |                              |     |
| <i>Olfr866</i>     |                | <i>Olfr866</i> | <i>Olfr866</i>     |                              |     |
| <i>Olfr870</i>     | <i>Olfr870</i> |                | <i>Olfr870</i>     |                              |     |
| <i>Olfr873</i>     | <i>Olfr873</i> |                | <i>Olfr873</i>     |                              |     |
| <i>Olfr874</i>     |                | <i>Olfr874</i> |                    |                              |     |
| <i>Olfr875</i>     |                | <i>Olfr875</i> |                    |                              |     |
| <i>Olfr884</i>     | <i>Olfr884</i> | <i>Olfr884</i> |                    |                              |     |
| <i>Olfr885</i>     |                |                | <i>Olfr885</i>     |                              |     |
| <i>Olfr888</i>     |                |                | <i>Olfr888</i>     |                              |     |

Suppl. Table 1  
(149/234)

|                    | ChIP-Seq hits      |                    |                | Unique hits with interactors |     |
|--------------------|--------------------|--------------------|----------------|------------------------------|-----|
|                    | unstimulated       | Ac                 | LPS            | Ac                           | LPS |
| <i>Olfr889</i>     |                    | <i>Olfr889</i>     |                |                              |     |
| <i>Olfr893</i>     |                    | <i>Olfr893</i>     |                |                              |     |
| <i>Olfr898</i>     |                    | <i>Olfr898</i>     |                |                              |     |
| <i>Olfr90</i>      |                    | <i>Olfr90</i>      | <i>Olfr90</i>  |                              |     |
| <i>Olfr901</i>     |                    | <i>Olfr901</i>     |                |                              |     |
| <i>Olfr902</i>     | <i>Olfr902</i>     |                    |                |                              |     |
| <i>Olfr904</i>     |                    | <i>Olfr904</i>     |                |                              |     |
| <i>Olfr906</i>     |                    | <i>Olfr906</i>     |                |                              |     |
| <i>Olfr907</i>     |                    |                    | <i>Olfr907</i> |                              |     |
| <i>Olfr908</i>     |                    | <i>Olfr908</i>     |                |                              |     |
| <i>Olfr91</i>      |                    |                    | <i>Olfr91</i>  |                              |     |
| <i>Olfr910</i>     |                    |                    | <i>Olfr910</i> |                              |     |
| <i>Olfr911-ps1</i> | <i>Olfr911-ps1</i> |                    |                |                              |     |
| <i>Olfr913</i>     | <i>Olfr913</i>     |                    |                |                              |     |
| <i>Olfr914</i>     |                    | <i>Olfr914</i>     |                |                              |     |
| <i>Olfr916</i>     |                    | <i>Olfr916</i>     |                |                              |     |
| <i>Olfr917</i>     | <i>Olfr917</i>     |                    |                |                              |     |
| <i>Olfr920</i>     |                    | <i>Olfr920</i>     |                |                              |     |
| <i>Olfr923</i>     |                    |                    | <i>Olfr923</i> |                              |     |
| <i>Olfr924</i>     |                    |                    | <i>Olfr924</i> |                              |     |
| <i>Olfr933</i>     | <i>Olfr933</i>     |                    |                |                              |     |
| <i>Olfr934</i>     |                    | <i>Olfr934</i>     |                |                              |     |
| <i>Olfr935</i>     |                    | <i>Olfr935</i>     |                |                              |     |
| <i>Olfr936</i>     |                    |                    | <i>Olfr936</i> |                              |     |
| <i>Olfr937</i>     |                    | <i>Olfr937</i>     |                |                              |     |
| <i>Olfr938</i>     |                    | <i>Olfr938</i>     |                |                              |     |
| <i>Olfr944</i>     |                    | <i>Olfr944</i>     | <i>Olfr944</i> |                              |     |
| <i>Olfr945</i>     |                    | <i>Olfr945</i>     |                |                              |     |
| <i>Olfr947-ps1</i> |                    | <i>Olfr947-ps1</i> |                |                              |     |
| <i>Olfr948</i>     | <i>Olfr948</i>     |                    |                |                              |     |
| <i>Olfr951</i>     |                    | <i>Olfr951</i>     |                |                              |     |
| <i>Olfr952</i>     | <i>Olfr952</i>     |                    | <i>Olfr952</i> |                              |     |
| <i>Olfr957</i>     |                    |                    | <i>Olfr957</i> |                              |     |
| <i>Olfr960</i>     |                    | <i>Olfr960</i>     |                |                              |     |
| <i>Olfr965</i>     |                    |                    | <i>Olfr965</i> |                              |     |
| <i>Olfr967</i>     |                    |                    | <i>Olfr967</i> |                              |     |
| <i>Olfr974</i>     |                    | <i>Olfr974</i>     |                |                              |     |
| <i>Olfr979</i>     |                    | <i>Olfr979</i>     |                |                              |     |
| <i>Olfr98</i>      |                    | <i>Olfr98</i>      |                |                              |     |
| <i>Olfr980</i>     |                    | <i>Olfr980</i>     |                |                              |     |
| <i>Olfr981</i>     |                    | <i>Olfr981</i>     |                |                              |     |
| <i>Olfr983</i>     | <i>Olfr983</i>     | <i>Olfr983</i>     |                |                              |     |
| <i>Olfr985</i>     |                    |                    | <i>Olfr985</i> |                              |     |
| <i>Olfr986</i>     |                    |                    | <i>Olfr986</i> |                              |     |
| <i>Olfr988</i>     |                    |                    | <i>Olfr988</i> |                              |     |
| <i>Olfr99</i>      | <i>Olfr99</i>      | <i>Olfr99</i>      | <i>Olfr99</i>  |                              |     |
| <i>Olfr992</i>     |                    | <i>Olfr992</i>     |                |                              |     |
| <i>Olfr993</i>     |                    | <i>Olfr993</i>     | <i>Olfr993</i> |                              |     |
| <i>Olfr995</i>     |                    |                    | <i>Olfr995</i> |                              |     |

Suppl. Table 1  
(150/234)

|                | ChIP-Seq hits |               |                | Unique hits with interactors |                |
|----------------|---------------|---------------|----------------|------------------------------|----------------|
|                | unstimulated  | Ac            | LPS            | Ac                           | LPS            |
| <i>Olfr998</i> |               |               | <i>Olfr998</i> |                              |                |
| <i>Olig3</i>   |               |               | <i>Olig3</i>   |                              | <i>Olig3</i>   |
| <i>Olr1</i>    |               | <i>Olr1</i>   |                | <i>Olr1</i>                  |                |
| <i>Oma1</i>    |               |               | <i>Oma1</i>    |                              | <i>Oma1</i>    |
| <i>Omd</i>     | <i>Omd</i>    |               | <i>Omd</i>     |                              |                |
| <i>Omt2a</i>   |               | <i>Omt2a</i>  |                |                              |                |
| <i>Onecut2</i> |               |               | <i>Onecut2</i> |                              | <i>Onecut2</i> |
| <i>Ooep</i>    |               |               | <i>Ooep</i>    |                              | <i>Ooep</i>    |
| <i>Oog1</i>    |               | <i>Oog1</i>   | <i>Oog1</i>    |                              |                |
| <i>Oosp1</i>   |               | <i>Oosp1</i>  |                |                              |                |
| <i>Oosp3</i>   | <i>Oosp3</i>  | <i>Oosp3</i>  |                |                              |                |
| <i>Opa1</i>    |               |               | <i>Opa1</i>    |                              | <i>Opa1</i>    |
| <i>Opa3</i>    |               |               | <i>Opa3</i>    |                              |                |
| <i>Opalin</i>  |               | <i>Opalin</i> | <i>Opalin</i>  |                              |                |
| <i>Ophn1</i>   |               |               | <i>Ophn1</i>   |                              |                |
| <i>Opn1mw</i>  | <i>Opn1mw</i> |               |                |                              |                |
| <i>Opn1sw</i>  |               | <i>Opn1sw</i> |                |                              |                |
| <i>Oprd1</i>   |               |               | <i>Oprd1</i>   |                              | <i>Oprd1</i>   |
| <i>Oprl1</i>   | <i>Oprl1</i>  |               | <i>Oprl1</i>   |                              |                |
| <i>Orai1</i>   |               |               | <i>Orai1</i>   |                              |                |
| <i>Orai2</i>   |               | <i>Orai2</i>  |                |                              |                |
| <i>Oraov1</i>  |               |               | <i>Oraov1</i>  |                              |                |
| <i>Orc1</i>    | <i>Orc1</i>   |               |                |                              |                |
| <i>Orc2</i>    |               | <i>Orc2</i>   | <i>Orc2</i>    |                              |                |
| <i>Orc5</i>    | <i>Orc5</i>   | <i>Orc5</i>   |                |                              |                |
| <i>Orc6</i>    |               | <i>Orc6</i>   | <i>Orc6</i>    |                              |                |
| <i>Os9</i>     | <i>Os9</i>    |               |                |                              |                |
| <i>Osbp2</i>   |               | <i>Osbp2</i>  |                |                              |                |
| <i>Osbpl10</i> |               |               | <i>Osbpl10</i> |                              |                |
| <i>Osbpl1a</i> |               |               | <i>Osbpl1a</i> |                              |                |
| <i>Osbpl5</i>  | <i>Osbpl5</i> |               |                |                              |                |
| <i>Osbpl8</i>  | <i>Osbpl8</i> | <i>Osbpl8</i> |                |                              |                |
| <i>Osbpl9</i>  | <i>Osbpl9</i> | <i>Osbpl9</i> | <i>Osbpl9</i>  |                              |                |
| <i>Oscar</i>   |               | <i>Oscar</i>  |                |                              |                |
| <i>Oser1</i>   |               | <i>Oser1</i>  | <i>Oser1</i>   |                              |                |
| <i>Osgep</i>   | <i>Osgep</i>  | <i>Osgep</i>  | <i>Osgep</i>   |                              |                |
| <i>Osgep1</i>  | <i>Osgep1</i> |               |                |                              |                |
| <i>Osgin1</i>  | <i>Osgin1</i> |               |                |                              |                |
| <i>Osgin2</i>  |               | <i>Osgin2</i> |                |                              |                |
| <i>Ost4</i>    | <i>Ost4</i>   |               |                |                              |                |
| <i>Ostc</i>    | <i>Ostc</i>   | <i>Ostc</i>   |                |                              |                |
| <i>Ostf1</i>   |               | <i>Ostf1</i>  |                | <i>Ostf1</i>                 |                |
| <i>Ostm1</i>   |               | <i>Ostm1</i>  |                |                              |                |
| <i>Ostn</i>    |               | <i>Ostn</i>   |                |                              |                |
| <i>Otc</i>     |               |               | <i>Otc</i>     |                              |                |
| <i>Otof</i>    |               | <i>Otof</i>   |                |                              |                |
| <i>Otol1</i>   |               | <i>Otol1</i>  | <i>Otol1</i>   |                              |                |
| <i>Otor</i>    | <i>Otor</i>   |               |                |                              |                |
| <i>Otos</i>    |               | <i>Otos</i>   |                |                              |                |

Suppl. Table 1  
(151/234)

|                           | CHIP-Seq hits             |                |                           | Unique hits with interactors |               |
|---------------------------|---------------------------|----------------|---------------------------|------------------------------|---------------|
|                           | unstimulated              | Ac             | LPS                       | Ac                           | LPS           |
| <i>Otp</i>                |                           |                | <i>Otp</i>                |                              |               |
| <i>Ott</i>                | <i>Ott</i>                | <i>Ott</i>     |                           |                              |               |
| <i>OTTMUSG00000016609</i> | <i>OTTMUSG00000016609</i> |                | <i>OTTMUSG00000016609</i> |                              |               |
| <i>Otub1</i>              |                           | <i>Otub1</i>   |                           |                              |               |
| <i>Otud1</i>              | <i>Otud1</i>              | <i>Otud1</i>   |                           |                              |               |
| <i>Otud3</i>              | <i>Otud3</i>              |                |                           |                              |               |
| <i>Otud4</i>              |                           |                | <i>Otud4</i>              |                              | <i>Otud4</i>  |
| <i>Otud5</i>              |                           | <i>Otud5</i>   | <i>Otud5</i>              |                              |               |
| <i>Otud6a</i>             |                           |                | <i>Otud6a</i>             |                              |               |
| <i>Otud7a</i>             |                           | <i>Otud7a</i>  |                           |                              |               |
| <i>Otud7b</i>             | <i>Otud7b</i>             |                |                           |                              |               |
| <i>Ovca2</i>              |                           |                | <i>Ovca2</i>              |                              |               |
| <i>Ovol1</i>              | <i>Ovol1</i>              |                |                           |                              |               |
| <i>Ovol3</i>              |                           | <i>Ovol3</i>   |                           |                              |               |
| <i>Oxa1l</i>              |                           |                | <i>Oxa1l</i>              |                              |               |
| <i>Oxct2a</i>             |                           | <i>Oxct2a</i>  |                           |                              |               |
| <i>Oxld1</i>              |                           | <i>Oxld1</i>   | <i>Oxld1</i>              |                              |               |
| <i>Oxnad1</i>             | <i>Oxnad1</i>             | <i>Oxnad1</i>  | <i>Oxnad1</i>             |                              |               |
| <i>Oxr1</i>               | <i>Oxr1</i>               | <i>Oxr1</i>    | <i>Oxr1</i>               |                              |               |
| <i>Oxsm</i>               |                           |                | <i>Oxsm</i>               |                              | <i>Oxsm</i>   |
| <i>Oxsr1</i>              |                           | <i>Oxsr1</i>   |                           |                              |               |
| <i>Oxt</i>                |                           | <i>Oxt</i>     | <i>Oxt</i>                |                              |               |
| <i>P2rx1</i>              |                           |                | <i>P2rx1</i>              |                              |               |
| <i>P2rx2</i>              |                           |                | <i>P2rx2</i>              |                              |               |
| <i>P2rx3</i>              |                           | <i>P2rx3</i>   |                           |                              |               |
| <i>P2rx4</i>              |                           |                | <i>P2rx4</i>              |                              |               |
| <i>P2rx6</i>              |                           |                | <i>P2rx6</i>              |                              |               |
| <i>P2rx7</i>              | <i>P2rx7</i>              | <i>P2rx7</i>   | <i>P2rx7</i>              |                              |               |
| <i>P2ry1</i>              |                           | <i>P2ry1</i>   |                           | <i>P2ry1</i>                 |               |
| <i>P2ry12</i>             |                           | <i>P2ry12</i>  |                           | <i>P2ry12</i>                |               |
| <i>P2ry13</i>             | <i>P2ry13</i>             | <i>P2ry13</i>  |                           |                              |               |
| <i>P2ry14</i>             |                           |                | <i>P2ry14</i>             |                              |               |
| <i>P2ry2</i>              |                           | <i>P2ry2</i>   |                           |                              |               |
| <i>P2ry6</i>              |                           | <i>P2ry6</i>   |                           |                              |               |
| <i>P3h2</i>               |                           |                | <i>P3h2</i>               |                              |               |
| <i>P3h4</i>               |                           |                | <i>P3h4</i>               |                              |               |
| <i>P4hb</i>               |                           |                | <i>P4hb</i>               |                              |               |
| <i>Pa2g4</i>              | <i>Pa2g4</i>              | <i>Pa2g4</i>   | <i>Pa2g4</i>              |                              |               |
| <i>Pabpc1l</i>            |                           | <i>Pabpc1l</i> |                           |                              |               |
| <i>Pabpc4</i>             |                           | <i>Pabpc4</i>  | <i>Pabpc4</i>             |                              |               |
| <i>Pabpc4l</i>            |                           | <i>Pabpc4l</i> | <i>Pabpc4l</i>            |                              |               |
| <i>Pabpc5</i>             |                           |                | <i>Pabpc5</i>             |                              | <i>Pabpc5</i> |
| <i>Pabpc6</i>             | <i>Pabpc6</i>             |                |                           |                              |               |
| <i>Pacrg</i>              |                           |                | <i>Pacrg</i>              |                              |               |
| <i>Pacrgl</i>             |                           | <i>Pacrgl</i>  |                           |                              |               |
| <i>Pacs1</i>              | <i>Pacs1</i>              |                | <i>Pacs1</i>              |                              |               |
| <i>Pacs2</i>              |                           | <i>Pacs2</i>   |                           | <i>Pacs2</i>                 |               |
| <i>Pacsin2</i>            |                           | <i>Pacsin2</i> |                           | <i>Pacsin2</i>               |               |
| <i>Padi2</i>              | <i>Padi2</i>              |                |                           |                              |               |

Suppl. Table 1  
(152/234)

|                 | CHIP-Seq hits |          |          | Unique hits with interactors |          |
|-----------------|---------------|----------|----------|------------------------------|----------|
|                 | unstimulated  | Ac       | LPS      | Ac                           | LPS      |
| <i>Padi3</i>    |               | Padi3    |          |                              |          |
| <i>Padi6</i>    |               |          | Padi6    |                              |          |
| <i>Paf1</i>     |               | Paf1     |          |                              |          |
| <i>Pafah1b1</i> |               |          | Pafah1b1 |                              | Pafah1b1 |
| <i>Pafah1b3</i> |               | Pafah1b3 |          |                              |          |
| <i>Pag1</i>     |               |          | Pag1     |                              | Pag1     |
| <i>Paip1</i>    |               |          | Paip1    |                              |          |
| <i>Paip2</i>    |               | Paip2    | Paip2    |                              |          |
| <i>Pak1ip1</i>  | Pak1ip1       |          |          |                              |          |
| <i>Pak2</i>     | Pak2          |          | Pak2     |                              |          |
| <i>Pak4</i>     |               | Pak4     |          |                              |          |
| <i>Palm3</i>    | Palm3         | Palm3    | Palm3    |                              |          |
| <i>Pam</i>      |               |          | Pam      |                              |          |
| <i>Pamr1</i>    |               |          | Pamr1    |                              |          |
| <i>Pan2</i>     | Pan2          | Pan2     | Pan2     |                              |          |
| <i>Pan3</i>     |               | Pan3     |          |                              |          |
| <i>Pank2</i>    | Pank2         | Pank2    | Pank2    |                              |          |
| <i>Paox</i>     |               | Paox     |          |                              |          |
| <i>Papd4</i>    |               | Papd4    |          |                              |          |
| <i>Papd7</i>    |               | Papd7    |          |                              |          |
| <i>Papl</i>     |               | Papl     | Papl     |                              |          |
| <i>Papola</i>   |               |          | Papola   |                              |          |
| <i>Papolb</i>   |               |          | Papolb   |                              |          |
| <i>Papolg</i>   |               | Papolg   |          |                              |          |
| <i>Papss1</i>   |               | Papss1   | Papss1   |                              |          |
| <i>Papss2</i>   |               | Papss2   |          |                              |          |
| <i>Paqr5</i>    |               |          | Paqr5    |                              | Paqr5    |
| <i>Paqr6</i>    |               |          | Paqr6    |                              |          |
| <i>Paqr8</i>    |               | Paqr8    |          | Paqr8                        |          |
| <i>Pard3</i>    |               | Pard3    |          |                              |          |
| <i>Pard6a</i>   | Pard6a        |          |          |                              |          |
| <i>Parg</i>     |               |          | Parg     |                              | Parg     |
| <i>Park7</i>    |               | Park7    | Park7    |                              |          |
| <i>Parn</i>     |               | Parn     |          |                              |          |
| <i>Parp1</i>    |               | Parp1    |          | Parp1                        |          |
| <i>Parp10</i>   | Parp10        |          | Parp10   |                              |          |
| <i>Parp2</i>    |               | Parp2    |          |                              |          |
| <i>Parp3</i>    | Parp3         |          | Parp3    |                              |          |
| <i>Parp6</i>    |               |          | Parp6    |                              |          |
| <i>Parp8</i>    |               | Parp8    |          |                              |          |
| <i>Parp9</i>    |               | Parp9    |          |                              |          |
| <i>Parva</i>    | Parva         | Parva    |          |                              |          |
| <i>Parvg</i>    | Parvg         |          |          |                              |          |
| <i>Pask</i>     |               | Pask     | Pask     |                              |          |
| <i>Pat11</i>    |               |          | Pat11    |                              | Pat11    |
| <i>Pat12</i>    |               | Pat12    |          |                              |          |
| <i>Patz1</i>    |               | Patz1    |          |                              |          |
| <i>Pawr</i>     | Pawr          | Pawr     | Pawr     |                              |          |
| <i>Pax2</i>     |               | Pax2     |          | Pax2                         |          |



Suppl. Table 1  
(153/234)

|                 | ChIP-Seq hits |         |         | Unique hits with interactors |         |
|-----------------|---------------|---------|---------|------------------------------|---------|
|                 | unstimulated  | Ac      | LPS     | Ac                           | LPS     |
| <i>Pax3</i>     |               | Pax3    |         | Pax3                         |         |
| <i>Pax4</i>     |               |         | Pax4    |                              |         |
| <i>Pax6</i>     |               |         | Pax6    |                              | Pax6    |
| <i>Pax6os1</i>  | Pax6os1       |         |         |                              |         |
| <i>Pax8</i>     | Pax8          |         |         |                              |         |
| <i>Pax9</i>     |               | Pax9    |         |                              |         |
| <i>Paxip1</i>   | Paxip1        |         |         |                              |         |
| <i>Pbdc1</i>    |               |         | Pbdc1   |                              |         |
| <i>Pbk</i>      | Pbk           |         |         |                              |         |
| <i>Pbld2</i>    |               |         | Pbld2   |                              |         |
| <i>Pbrm1</i>    | Pbrm1         |         |         |                              |         |
| <i>Pbx1</i>     | Pbx1          |         |         |                              |         |
| <i>Pbx2</i>     | Pbx2          |         |         |                              |         |
| <i>Pbx3</i>     |               |         | Pbx3    |                              | Pbx3    |
| <i>Pbx4</i>     |               |         | Pbx4    |                              |         |
| <i>Pbxip1</i>   |               | Pbxip1  | Pbxip1  |                              |         |
| <i>Pcbd2</i>    |               |         | Pcbd2   |                              |         |
| <i>Pcbp2</i>    |               |         | Pcbp2   |                              |         |
| <i>Pcbp3</i>    | Pcbp3         |         |         |                              |         |
| <i>Pcca</i>     |               |         | Pcca    |                              |         |
| <i>Pcdh10</i>   |               |         | Pcdh10  |                              | Pcdh10  |
| <i>Pcdh11x</i>  |               | Pcdh11x |         |                              |         |
| <i>Pcdh20</i>   |               | Pcdh20  |         |                              |         |
| <i>Pcdh8</i>    |               | Pcdh8   |         | Pcdh8                        |         |
| <i>Pcdh9</i>    | Pcdh9         |         |         |                              |         |
| <i>Pcdha12</i>  |               |         | Pcdha12 |                              | Pcdha12 |
| <i>Pcdha6</i>   |               | Pcdha6  |         |                              |         |
| <i>Pcdha7</i>   | Pcdha7        |         |         |                              |         |
| <i>Pcdha7-g</i> | Pcdha7-g      |         |         |                              |         |
| <i>Pcdhb1</i>   |               |         | Pcdhb1  |                              |         |
| <i>Pcdhb10</i>  |               |         | Pcdhb10 |                              |         |
| <i>Pcdhb12</i>  |               | Pcdhb12 |         |                              |         |
| <i>Pcdhb13</i>  |               | Pcdhb13 |         | Pcdhb13                      |         |
| <i>Pcdhb18</i>  |               |         | Pcdhb18 |                              |         |
| <i>Pcdhb19</i>  |               | Pcdhb19 |         |                              |         |
| <i>Pcdhb20</i>  | Pcdhb20       | Pcdhb20 |         |                              |         |
| <i>Pcdhb21</i>  |               |         | Pcdhb21 |                              |         |
| <i>Pcdhb22</i>  |               | Pcdhb22 |         |                              |         |
| <i>Pcdhb3</i>   |               |         | Pcdhb3  |                              |         |
| <i>Pcdhb5</i>   |               | Pcdhb5  |         |                              |         |
| <i>Pcdhb6</i>   | Pcdhb6        | Pcdhb6  |         |                              |         |
| <i>Pcdhb8</i>   | Pcdhb8        |         | Pcdhb8  |                              |         |
| <i>Pcdhga3</i>  |               | Pcdhga3 |         |                              |         |
| <i>Pcdhga6</i>  |               |         | Pcdhga6 |                              |         |
| <i>Pcdhga9</i>  |               | Pcdhga9 |         |                              |         |
| <i>Pcdhgb4</i>  |               | Pcdhgb4 |         |                              |         |
| <i>Pcdhgb5</i>  |               |         | Pcdhgb5 |                              |         |
| <i>Pcdhgb6</i>  | Pcdhgb6       |         |         |                              |         |
| <i>Pcdhgc4</i>  |               |         | Pcdhgc4 |                              |         |

Suppl. Table 1  
(154/234)

|                | CHIP-Seq hits |         |         | Unique hits with interactors |       |
|----------------|---------------|---------|---------|------------------------------|-------|
|                | unstimulated  | Ac      | LPS     | Ac                           | LPS   |
| <i>Pcdhgc5</i> | Pcdhgc5       | Pcdhgc5 | Pcdhgc5 |                              |       |
| <i>Pced1a</i>  |               | Pced1a  |         |                              |       |
| <i>Pced1b</i>  |               | Pced1b  |         |                              |       |
| <i>Pcf11</i>   |               |         | Pcf11   |                              | Pcf11 |
| <i>Pcgf1</i>   |               | Pcgf1   |         |                              |       |
| <i>Pcgf3</i>   | Pcgf3         | Pcgf3   | Pcgf3   |                              |       |
| <i>Pcgf5</i>   |               | Pcgf5   |         |                              |       |
| <i>Pcgf6</i>   |               | Pcgf6   |         |                              |       |
| <i>Pcid2</i>   |               | Pcid2   |         |                              |       |
| <i>Pcif1</i>   |               | Pcif1   | Pcif1   |                              |       |
| <i>Pcmt1</i>   | Pcmt1         |         | Pcmt1   |                              |       |
| <i>Pcmtd2</i>  | Pcmtd2        | Pcmtd2  |         |                              |       |
| <i>Pcna</i>    |               |         | Pcna    |                              | Pcna  |
| <i>Pcnt</i>    |               | Pcnt    |         |                              |       |
| <i>Pcnx</i>    |               |         | Pcnx    |                              |       |
| <i>Pcolce</i>  | Pcolce        |         |         |                              |       |
| <i>Pcolce2</i> |               |         | Pcolce2 |                              |       |
| <i>Pcp2</i>    |               |         | Pcp2    |                              | Pcp2  |
| <i>Pcp4</i>    |               | Pcp4    |         |                              |       |
| <i>Pcsk2</i>   | Pcsk2         | Pcsk2   | Pcsk2   |                              |       |
| <i>Pcsk4</i>   |               |         | Pcsk4   |                              |       |
| <i>Pcsk7</i>   | Pcsk7         |         | Pcsk7   |                              |       |
| <i>Pcsk9</i>   |               | Pcsk9   |         |                              |       |
| <i>Pcx</i>     |               |         | Pcx     |                              | Pcx   |
| <i>Pcyt1b</i>  |               | Pcyt1b  |         |                              |       |
| <i>Pcyt2</i>   |               | Pcyt2   |         |                              |       |
| <i>Pdap1</i>   | Pdap1         |         |         |                              |       |
| <i>Pdcd2</i>   | Pdcd2         |         |         |                              |       |
| <i>Pdcd2l</i>  |               |         | Pdcd2l  |                              |       |
| <i>Pdcd6</i>   |               | Pdcd6   |         |                              |       |
| <i>Pdcd6ip</i> |               | Pdcd6ip |         |                              |       |
| <i>Pdcl</i>    |               |         | Pdcl    |                              | Pdcl  |
| <i>Pddc1</i>   |               |         | Pddc1   |                              |       |
| <i>Pde10a</i>  |               | Pde10a  | Pde10a  |                              |       |
| <i>Pde12</i>   |               | Pde12   |         |                              |       |
| <i>Pde1c</i>   |               |         | Pde1c   |                              |       |
| <i>Pde2a</i>   |               | Pde2a   |         |                              |       |
| <i>Pde3b</i>   |               |         | Pde3b   |                              |       |
| <i>Pde4a</i>   |               | Pde4a   | Pde4a   |                              |       |
| <i>Pde4b</i>   | Pde4b         | Pde4b   | Pde4b   |                              |       |
| <i>Pde4c</i>   |               | Pde4c   |         | Pde4c                        |       |
| <i>Pde4dip</i> |               |         | Pde4dip |                              |       |
| <i>Pde5a</i>   | Pde5a         |         |         |                              |       |
| <i>Pde6a</i>   |               | Pde6a   |         |                              |       |
| <i>Pde6c</i>   |               | Pde6c   |         |                              |       |
| <i>Pde6d</i>   |               | Pde6d   | Pde6d   |                              |       |
| <i>Pde6g</i>   |               | Pde6g   |         |                              |       |
| <i>Pde8a</i>   |               | Pde8a   |         |                              |       |
| <i>Pde8b</i>   |               | Pde8b   | Pde8b   |                              |       |

Suppl. Table 1  
(155/234)

|                 | CHIP-Seq hits |         |        | Unique hits with interactors |      |
|-----------------|---------------|---------|--------|------------------------------|------|
|                 | unstimulated  | Ac      | LPS    | Ac                           | LPS  |
| <i>Pde9a</i>    |               |         | Pde9a  |                              |      |
| <i>Pdf</i>      |               | Pdf     |        | Pdf                          |      |
| <i>Pdgfb</i>    |               |         | Pdgfb  |                              |      |
| <i>Pdgfd</i>    | Pdgfd         |         | Pdgfd  |                              |      |
| <i>Pdgfra</i>   |               | Pdgfra  |        |                              |      |
| <i>Pdgfrl</i>   |               | Pdgfrl  | Pdgfrl |                              |      |
| <i>Pdhb</i>     | Pdhb          | Pdhb    | Pdhb   |                              |      |
| <i>Pdhx</i>     |               | Pdhx    |        |                              |      |
| <i>Pdia2</i>    |               | Pdia2   |        |                              |      |
| <i>Pdia4</i>    |               |         | Pdia4  |                              |      |
| <i>Pdia5</i>    |               | Pdia5   | Pdia5  |                              |      |
| <i>Pdik1l</i>   |               |         | Pdik1l |                              |      |
| <i>Pdk1</i>     |               | Pdk1    | Pdk1   |                              |      |
| <i>Pdk2</i>     |               | Pdk2    |        |                              |      |
| <i>Pdk3</i>     | Pdk3          | Pdk3    | Pdk3   |                              |      |
| <i>Pdp2</i>     |               | Pdp2    |        | Pdp2                         |      |
| <i>Pdpr</i>     | Pdpr          | Pdpr    | Pdpr   |                              |      |
| <i>Pds5a</i>    | Pds5a         | Pds5a   | Pds5a  |                              |      |
| <i>Pds5b</i>    |               |         | Pds5b  |                              |      |
| <i>Pdss2</i>    |               |         | Pdss2  |                              |      |
| <i>Pdx1</i>     |               | Pdx1    |        | Pdx1                         |      |
| <i>Pdxdc1</i>   | Pdxdc1        |         |        |                              |      |
| <i>Pdxk-ps</i>  |               | Pdxk-ps |        |                              |      |
| <i>Pdyn</i>     |               | Pdyn    |        |                              |      |
| <i>Pdzd2</i>    | Pdzd2         |         |        |                              |      |
| <i>Pdzk1ip1</i> | Pdzk1ip1      |         |        |                              |      |
| <i>Pdzph1</i>   | Pdzph1        |         |        |                              |      |
| <i>Pea15a</i>   |               | Pea15a  |        |                              |      |
| <i>Peak1</i>    |               | Peak1   | Peak1  |                              |      |
| <i>Pebp1</i>    | Pebp1         |         | Pebp1  |                              |      |
| <i>Pebp4</i>    |               | Pebp4   |        |                              |      |
| <i>Pecam1</i>   | Pecam1        | Pecam1  | Pecam1 |                              |      |
| <i>Pecr</i>     |               | Pecr    |        |                              |      |
| <i>Peg10</i>    | Peg10         | Peg10   |        |                              |      |
| <i>Peg3</i>     |               | Peg3    |        | Peg3                         |      |
| <i>Pelp1</i>    |               |         | Pelp1  |                              |      |
| <i>Pemt</i>     |               |         | Pemt   |                              | Pemt |
| <i>Peo1</i>     |               | Peo1    | Peo1   |                              |      |
| <i>Per1</i>     |               |         | Per1   |                              |      |
| <i>Per2</i>     |               | Per2    | Per2   |                              |      |
| <i>Per3</i>     |               | Per3    | Per3   |                              |      |
| <i>Pes1</i>     |               | Pes1    | Pes1   |                              |      |
| <i>Pet117</i>   |               |         | Pet117 |                              |      |
| <i>Pet2</i>     |               |         | Pet2   |                              |      |
| <i>Pex1</i>     |               | Pex1    |        |                              |      |
| <i>Pex10</i>    |               |         | Pex10  |                              |      |
| <i>Pex11a</i>   |               |         | Pex11a |                              |      |
| <i>Pex11b</i>   |               | Pex11b  | Pex11b |                              |      |
| <i>Pex11g</i>   |               |         | Pex11g |                              |      |

Suppl. Table 1  
(156/234)

|                | ChIP-Seq hits  |                |                | Unique hits with interactors |              |
|----------------|----------------|----------------|----------------|------------------------------|--------------|
|                | unstimulated   | Ac             | LPS            | Ac                           | LPS          |
| <i>Pex13</i>   |                |                | <i>Pex13</i>   |                              | <i>Pex13</i> |
| <i>Pex14</i>   | <i>Pex14</i>   | <i>Pex14</i>   | <i>Pex14</i>   |                              |              |
| <i>Pex16</i>   |                |                | <i>Pex16</i>   |                              |              |
| <i>Pex2</i>    |                | <i>Pex2</i>    |                |                              |              |
| <i>Pex3</i>    |                |                | <i>Pex3</i>    |                              |              |
| <i>Pex5</i>    |                | <i>Pex5</i>    |                |                              |              |
| <i>Pex5l</i>   | <i>Pex5l</i>   |                |                |                              |              |
| <i>Pf4</i>     |                | <i>Pf4</i>     |                |                              |              |
| <i>Pfdn1</i>   |                | <i>Pfdn1</i>   |                |                              |              |
| <i>Pfdn2</i>   | <i>Pfdn2</i>   | <i>Pfdn2</i>   | <i>Pfdn2</i>   |                              |              |
| <i>Pfdn4</i>   |                |                | <i>Pfdn4</i>   |                              |              |
| <i>Pfkfb2</i>  |                |                | <i>Pfkfb2</i>  |                              |              |
| <i>Pfkfb3</i>  |                |                | <i>Pfkfb3</i>  |                              |              |
| <i>Pfkl</i>    |                | <i>Pfkl</i>    |                | <i>Pfkl</i>                  |              |
| <i>Pfn2</i>    |                | <i>Pfn2</i>    |                | <i>Pfn2</i>                  |              |
| <i>Pfn4</i>    |                |                | <i>Pfn4</i>    |                              |              |
| <i>Pfpl</i>    |                |                | <i>Pfpl</i>    |                              |              |
| <i>Pgam1</i>   | <i>Pgam1</i>   | <i>Pgam1</i>   | <i>Pgam1</i>   |                              |              |
| <i>Pgam2</i>   | <i>Pgam2</i>   | <i>Pgam2</i>   | <i>Pgam2</i>   |                              |              |
| <i>Pgap2</i>   |                | <i>Pgap2</i>   | <i>Pgap2</i>   |                              |              |
| <i>Pgap3</i>   |                | <i>Pgap3</i>   |                |                              |              |
| <i>Pgd</i>     |                |                | <i>Pgd</i>     |                              |              |
| <i>Pgf</i>     |                | <i>Pgf</i>     |                |                              |              |
| <i>Pgk1</i>    |                | <i>Pgk1</i>    |                |                              |              |
| <i>Pgl</i>     |                | <i>Pgl</i>     |                |                              |              |
| <i>Pglyrp3</i> |                |                | <i>Pglyrp3</i> |                              |              |
| <i>Pgm2l1</i>  | <i>Pgm2l1</i>  | <i>Pgm2l1</i>  |                |                              |              |
| <i>Pgpep1l</i> | <i>Pgpep1l</i> | <i>Pgpep1l</i> |                |                              |              |
| <i>Pgr</i>     |                |                | <i>Pgr</i>     |                              | <i>Pgr</i>   |
| <i>Pgr15l</i>  | <i>Pgr15l</i>  |                |                |                              |              |
| <i>Phactr1</i> | <i>Phactr1</i> | <i>Phactr1</i> |                |                              |              |
| <i>Phactr2</i> | <i>Phactr2</i> |                |                |                              |              |
| <i>Phactr3</i> |                | <i>Phactr3</i> |                |                              |              |
| <i>Phactr4</i> |                | <i>Phactr4</i> | <i>Phactr4</i> |                              |              |
| <i>Phax</i>    |                | <i>Phax</i>    |                |                              |              |
| <i>Phb</i>     |                | <i>Phb</i>     |                |                              |              |
| <i>Phb2</i>    |                | <i>Phb2</i>    | <i>Phb2</i>    |                              |              |
| <i>Phc1</i>    |                | <i>Phc1</i>    |                |                              |              |
| <i>Phc3</i>    |                | <i>Phc3</i>    | <i>Phc3</i>    |                              |              |
| <i>Phf11b</i>  |                | <i>Phf11b</i>  |                |                              |              |
| <i>Phf12</i>   |                | <i>Phf12</i>   | <i>Phf12</i>   |                              |              |
| <i>Phf13</i>   |                | <i>Phf13</i>   |                |                              |              |
| <i>Phf14</i>   | <i>Phf14</i>   |                |                |                              |              |
| <i>Phf19</i>   |                | <i>Phf19</i>   | <i>Phf19</i>   |                              |              |
| <i>Phf2</i>    |                | <i>Phf2</i>    |                |                              |              |
| <i>Phf20</i>   | <i>Phf20</i>   | <i>Phf20</i>   | <i>Phf20</i>   |                              |              |
| <i>Phf20l1</i> |                | <i>Phf20l1</i> | <i>Phf20l1</i> |                              |              |
| <i>Phf21a</i>  |                | <i>Phf21a</i>  |                |                              |              |
| <i>Phf21b</i>  |                | <i>Phf21b</i>  | <i>Phf21b</i>  |                              |              |

Suppl. Table 1  
(157/234)

|                 | CHIP-Seq hits |          |         | Unique hits with interactors |         |
|-----------------|---------------|----------|---------|------------------------------|---------|
|                 | unstimulated  | Ac       | LPS     | Ac                           | LPS     |
| <i>Phf23</i>    |               | Phf23    | Phf23   |                              |         |
| <i>Phf24</i>    | Phf24         |          |         |                              |         |
| <i>Phf3</i>     | Phf3          |          |         |                              |         |
| <i>Phf5a</i>    |               |          | Phf5a   |                              |         |
| <i>Phf6</i>     | Phf6          |          | Phf6    |                              |         |
| <i>Phf8</i>     |               | Phf8     | Phf8    |                              |         |
| <i>Phgdh</i>    | Phgdh         |          | Phgdh   |                              |         |
| <i>Phgr1</i>    |               |          | Phgr1   |                              |         |
| <i>Phip</i>     | Phip          |          | Phip    |                              |         |
| <i>Phka1</i>    |               | Phka1    |         |                              |         |
| <i>Phkg1</i>    |               |          | Phkg1   |                              |         |
| <i>Phlda2</i>   |               | Phlda2   |         |                              |         |
| <i>Phldb1</i>   |               |          | Phldb1  |                              |         |
| <i>Phlpp1</i>   |               |          | Phlpp1  |                              | Phlpp1  |
| <i>Phospho2</i> |               | Phospho2 |         |                              |         |
| <i>Phox2b</i>   |               |          | Phox2b  |                              |         |
| <i>Phpt1</i>    |               | Phpt1    | Phpt1   |                              |         |
| <i>Phrf1</i>    |               | Phrf1    |         |                              |         |
| <i>Phtf1</i>    | Phtf1         |          | Phtf1   |                              |         |
| <i>Phyh</i>     |               |          | Phyh    |                              |         |
| <i>Phyhd1</i>   |               | Phyhd1   | Phyhd1  |                              |         |
| <i>Phyhipl</i>  |               | Phyhipl  |         |                              |         |
| <i>Pi15</i>     |               |          | Pi15    |                              | Pi15    |
| <i>Pi16</i>     |               | Pi16     | Pi16    |                              |         |
| <i>Pi4k2a</i>   | Pi4k2a        |          |         |                              |         |
| <i>Pi4k2b</i>   |               |          | Pi4k2b  |                              |         |
| <i>Pi4kb</i>    | Pi4kb         | Pi4kb    | Pi4kb   |                              |         |
| <i>Pias1</i>    |               | Pias1    |         | Pias1                        |         |
| <i>Pias3</i>    |               |          | Pias3   |                              | Pias3   |
| <i>Pias4</i>    |               | Pias4    | Pias4   |                              |         |
| <i>Pibf1</i>    |               | Pibf1    |         |                              |         |
| <i>Pick1</i>    |               | Pick1    |         |                              |         |
| <i>Pid1</i>     |               |          | Pid1    |                              |         |
| <i>Pidd1</i>    | Pidd1         |          |         |                              |         |
| <i>Piezo1</i>   |               |          | Piezo1  |                              |         |
| <i>Pif1</i>     |               | Pif1     | Pif1    |                              |         |
| <i>Pifo</i>     | Pifo          | Pifo     | Pifo    |                              |         |
| <i>Pigb</i>     |               | Pigb     | Pigb    |                              |         |
| <i>Pigf</i>     |               |          | Pigf    |                              |         |
| <i>Pigh</i>     |               | Pigh     |         | Pigh                         |         |
| <i>Pigl</i>     | Pigl          |          | Pigl    |                              |         |
| <i>Pigp</i>     | Pigp          | Pigp     |         |                              |         |
| <i>Pigq</i>     |               | Pigq     |         |                              |         |
| <i>Pigr</i>     |               |          | Pigr    |                              |         |
| <i>Pigyl</i>    | Pigyl         |          |         |                              |         |
| <i>Pih1d3</i>   |               |          | Pih1d3  |                              |         |
| <i>Pik3ap1</i>  |               |          | Pik3ap1 |                              |         |
| <i>Pik3c2a</i>  |               |          | Pik3c2a |                              | Pik3c2a |
| <i>Pik3c2b</i>  |               | Pik3c2b  |         | Pik3c2b                      |         |

Suppl. Table 1  
(158/234)

|                   | ChIP-Seq hits     |                 |                 | Unique hits with interactors |               |
|-------------------|-------------------|-----------------|-----------------|------------------------------|---------------|
|                   | unstimulated      | Ac              | LPS             | Ac                           | LPS           |
| <i>Pik3c3</i>     |                   | <i>Pik3c3</i>   | <i>Pik3c3</i>   |                              |               |
| <i>Pik3ca</i>     |                   | <i>Pik3ca</i>   |                 | <i>Pik3ca</i>                |               |
| <i>Pik3cb</i>     | <i>Pik3cb</i>     | <i>Pik3cb</i>   | <i>Pik3cb</i>   |                              |               |
| <i>Pik3cd</i>     | <i>Pik3cd</i>     |                 |                 |                              |               |
| <i>Pik3cg</i>     |                   | <i>Pik3cg</i>   |                 | <i>Pik3cg</i>                |               |
| <i>Pik3r1</i>     | <i>Pik3r1</i>     | <i>Pik3r1</i>   | <i>Pik3r1</i>   |                              |               |
| <i>Pik3r4</i>     |                   | <i>Pik3r4</i>   | <i>Pik3r4</i>   |                              |               |
| <i>Pik3r6</i>     |                   |                 | <i>Pik3r6</i>   |                              |               |
| <i>Pilra</i>      |                   | <i>Pilra</i>    | <i>Pilra</i>    |                              |               |
| <i>Pim1</i>       | <i>Pim1</i>       | <i>Pim1</i>     | <i>Pim1</i>     |                              |               |
| <i>Pim3</i>       |                   | <i>Pim3</i>     | <i>Pim3</i>     |                              |               |
| <i>Pin1</i>       |                   |                 | <i>Pin1</i>     |                              | <i>Pin1</i>   |
| <i>Pin1rt1</i>    |                   |                 | <i>Pin1rt1</i>  |                              |               |
| <i>Pinlyp</i>     |                   |                 | <i>Pinlyp</i>   |                              |               |
| <i>Pinx1</i>      |                   | <i>Pinx1</i>    |                 |                              |               |
| <i>Pip</i>        |                   | <i>Pip</i>      |                 |                              |               |
| <i>Pip4k2b</i>    |                   |                 | <i>Pip4k2b</i>  |                              |               |
| <i>Pip4k2c</i>    |                   |                 | <i>Pip4k2c</i>  |                              |               |
| <i>Pip5k1a</i>    | <i>Pip5k1a</i>    |                 |                 |                              |               |
| <i>Pip5k1b</i>    |                   |                 | <i>Pip5k1b</i>  |                              |               |
| <i>Pir</i>        |                   | <i>Pir</i>      |                 |                              |               |
| <i>Pira1</i>      | <i>Pira1</i>      |                 |                 |                              |               |
| <i>Pira2</i>      |                   |                 | <i>Pira2</i>    |                              | <i>Pira2</i>  |
| <i>Pira6</i>      |                   |                 | <i>Pira6</i>    |                              |               |
| <i>Pisd</i>       |                   |                 | <i>Pisd</i>     |                              |               |
| <i>Pisd-ps1</i>   | <i>Pisd-ps1</i>   |                 |                 |                              |               |
| <i>Pisd-ps2</i>   |                   | <i>Pisd-ps2</i> | <i>Pisd-ps2</i> |                              |               |
| <i>Pithd1</i>     |                   | <i>Pithd1</i>   |                 |                              |               |
| <i>Pitpna</i>     |                   |                 | <i>Pitpna</i>   |                              | <i>Pitpna</i> |
| <i>Pitpnb</i>     |                   | <i>Pitpnb</i>   |                 | <i>Pitpnb</i>                |               |
| <i>Pitpnc1</i>    |                   | <i>Pitpnc1</i>  | <i>Pitpnc1</i>  |                              |               |
| <i>Pitpnm1</i>    |                   |                 | <i>Pitpnm1</i>  |                              |               |
| <i>Pitpnm2</i>    |                   | <i>Pitpnm2</i>  |                 | <i>Pitpnm2</i>               |               |
| <i>Pitpnm2os1</i> | <i>Pitpnm2os1</i> |                 |                 |                              |               |
| <i>Pitrm1</i>     |                   | <i>Pitrm1</i>   |                 |                              |               |
| <i>Pitx1</i>      |                   | <i>Pitx1</i>    |                 | <i>Pitx1</i>                 |               |
| <i>Pitx3</i>      | <i>Pitx3</i>      |                 |                 |                              |               |
| <i>Piwil2</i>     |                   |                 | <i>Piwil2</i>   |                              | <i>Piwil2</i> |
| <i>Pja1</i>       |                   |                 | <i>Pja1</i>     |                              | <i>Pja1</i>   |
| <i>Pja2</i>       |                   | <i>Pja2</i>     |                 |                              |               |
| <i>Pkd1</i>       |                   |                 | <i>Pkd1</i>     |                              |               |
| <i>Pkd1l2</i>     |                   |                 | <i>Pkd1l2</i>   |                              |               |
| <i>Pkdcc</i>      |                   |                 | <i>Pkdcc</i>    |                              |               |
| <i>Pkhd1l1</i>    |                   | <i>Pkhd1l1</i>  |                 |                              |               |
| <i>Pkmyt1</i>     | <i>Pkmyt1</i>     |                 |                 |                              |               |
| <i>Pkn3</i>       | <i>Pkn3</i>       | <i>Pkn3</i>     | <i>Pkn3</i>     |                              |               |
| <i>Pkp1</i>       |                   | <i>Pkp1</i>     |                 |                              |               |
| <i>Pkp2</i>       |                   | <i>Pkp2</i>     |                 |                              |               |
| <i>Pkp4</i>       |                   |                 | <i>Pkp4</i>     |                              |               |

Suppl. Table 1  
(159/234)

|                  | CHIP-Seq hits |          |           | Unique hits with interactors |       |
|------------------|---------------|----------|-----------|------------------------------|-------|
|                  | unstimulated  | Ac       | LPS       | Ac                           | LPS   |
| <i>Pla1a</i>     | Pla1a         |          | Pla1a     |                              |       |
| <i>Pla2g10os</i> |               |          | Pla2g10os |                              |       |
| <i>Pla2g12a</i>  | Pla2g12a      | Pla2g12a |           |                              |       |
| <i>Pla2g15</i>   |               | Pla2g15  | Pla2g15   |                              |       |
| <i>Pla2g1b</i>   |               | Pla2g1b  |           |                              |       |
| <i>Pla2g2e</i>   |               | Pla2g2e  |           |                              |       |
| <i>Pla2g3</i>    |               | Pla2g3   |           |                              |       |
| <i>Pla2g4a</i>   | Pla2g4a       | Pla2g4a  | Pla2g4a   |                              |       |
| <i>Pla2g4d</i>   | Pla2g4d       |          | Pla2g4d   |                              |       |
| <i>Pla2g6</i>    | Pla2g6        |          |           |                              |       |
| <i>Plac1</i>     | Plac1         |          | Plac1     |                              |       |
| <i>Plac8l1</i>   |               |          | Plac8l1   |                              |       |
| <i>Plag1</i>     |               | Plag1    |           | Plag1                        |       |
| <i>Platr17</i>   |               | Platr17  | Platr17   |                              |       |
| <i>Platr7</i>    |               |          | Platr7    |                              |       |
| <i>Platr8</i>    |               | Platr8   |           |                              |       |
| <i>Platr9</i>    |               |          | Platr9    |                              |       |
| <i>Plaur</i>     | Plaur         |          |           |                              |       |
| <i>Plb1</i>      |               | Plb1     |           |                              |       |
| <i>Plcb3</i>     |               |          | Plcb3     |                              |       |
| <i>Plcb4</i>     |               | Plcb4    | Plcb4     |                              |       |
| <i>Plcd1</i>     |               |          | Plcd1     |                              |       |
| <i>Plcd3</i>     |               | Plcd3    | Plcd3     |                              |       |
| <i>Plce1</i>     |               | Plce1    |           |                              |       |
| <i>Plcg1</i>     | Plcg1         | Plcg1    |           |                              |       |
| <i>Plcg2</i>     | Plcg2         |          | Plcg2     |                              |       |
| <i>Plch1</i>     |               | Plch1    |           | Plch1                        |       |
| <i>Plcl1</i>     |               |          | Plcl1     |                              | Plcl1 |
| <i>Plcxd2</i>    |               | Plcxd2   |           |                              |       |
| <i>Plcz1</i>     |               |          | Plcz1     |                              |       |
| <i>Pld3</i>      |               | Pld3     |           | Pld3                         |       |
| <i>Pld5</i>      |               | Pld5     |           |                              |       |
| <i>Plec</i>      | Plec          | Plec     |           |                              |       |
| <i>Plekha1</i>   |               | Plekha1  | Plekha1   |                              |       |
| <i>Plekha2</i>   | Plekha2       |          |           |                              |       |
| <i>Plekha4</i>   | Plekha4       | Plekha4  | Plekha4   |                              |       |
| <i>Plekha5</i>   |               | Plekha5  | Plekha5   |                              |       |
| <i>Plekha6</i>   |               | Plekha6  |           |                              |       |
| <i>Plekhd1</i>   |               |          | Plekhd1   |                              |       |
| <i>Plekhf2</i>   |               | Plekhf2  |           |                              |       |
| <i>Plekhg6</i>   |               |          | Plekhg6   |                              |       |
| <i>Plekhm1</i>   |               | Plekhm1  |           |                              |       |
| <i>Plekhn1</i>   |               |          | Plekhn1   |                              |       |
| <i>Plekho1</i>   | Plekho1       | Plekho1  |           |                              |       |
| <i>Plekho2</i>   |               |          | Plekho2   |                              |       |
| <i>Plekhs1</i>   |               | Plekhs1  |           |                              |       |
| <i>Plet1os</i>   |               | Plet1os  |           |                              |       |
| <i>Plin1</i>     |               |          | Plin1     |                              |       |
| <i>Plin3</i>     |               |          | Plin3     |                              | Plin3 |

Suppl. Table 1  
(160/234)

|                  | CHIP-Seq hits |                 |                  | Unique hits with interactors |               |
|------------------|---------------|-----------------|------------------|------------------------------|---------------|
|                  | unstimulated  | Ac              | LPS              | Ac                           | LPS           |
| <i>Plin4</i>     |               | <i>Plin4</i>    |                  |                              |               |
| <i>Plk1</i>      | <i>Plk1</i>   |                 | <i>Plk1</i>      |                              |               |
| <i>Plk3</i>      |               |                 | <i>Plk3</i>      |                              | <i>Plk3</i>   |
| <i>Plk5</i>      |               | <i>Plk5</i>     |                  |                              |               |
| <i>Pln</i>       |               |                 | <i>Pln</i>       |                              |               |
| <i>Plod3</i>     | <i>Plod3</i>  | <i>Plod3</i>    | <i>Plod3</i>     |                              |               |
| <i>Plp2</i>      |               | <i>Plp2</i>     |                  |                              |               |
| <i>Plrg1</i>     |               |                 | <i>Plrg1</i>     |                              |               |
| <i>Pls1</i>      |               | <i>Pls1</i>     |                  |                              |               |
| <i>Plscr4</i>    | <i>Plscr4</i> |                 |                  |                              |               |
| <i>Plvap</i>     |               | <i>Plvap</i>    |                  |                              |               |
| <i>Plxdc2</i>    |               | <i>Plxdc2</i>   |                  |                              |               |
| <i>Plxna4os1</i> |               |                 | <i>Plxna4os1</i> |                              |               |
| <i>Plxnc1</i>    |               |                 | <i>Plxnc1</i>    |                              | <i>Plxnc1</i> |
| <i>Pm20d1</i>    |               | <i>Pm20d1</i>   |                  |                              |               |
| <i>Pmaip1</i>    |               | <i>Pmaip1</i>   |                  |                              |               |
| <i>Pmch</i>      | <i>Pmch</i>   | <i>Pmch</i>     |                  |                              |               |
| <i>Pmel</i>      | <i>Pmel</i>   |                 |                  |                              |               |
| <i>Pmepa1</i>    |               | <i>Pmepa1</i>   |                  |                              |               |
| <i>Pmf1</i>      | <i>Pmf1</i>   |                 |                  |                              |               |
| <i>Pmis2</i>     |               | <i>Pmis2</i>    |                  |                              |               |
| <i>Pml</i>       | <i>Pml</i>    | <i>Pml</i>      | <i>Pml</i>       |                              |               |
| <i>Pmm1</i>      | <i>Pmm1</i>   | <i>Pmm1</i>     | <i>Pmm1</i>      |                              |               |
| <i>Pmp2</i>      |               | <i>Pmp2</i>     | <i>Pmp2</i>      |                              |               |
| <i>Pmp22</i>     | <i>Pmp22</i>  | <i>Pmp22</i>    |                  |                              |               |
| <i>Pmvk</i>      |               | <i>Pmvk</i>     | <i>Pmvk</i>      |                              |               |
| <i>Pnkd</i>      | <i>Pnkd</i>   | <i>Pnkd</i>     |                  |                              |               |
| <i>Pnky</i>      |               | <i>Pnky</i>     | <i>Pnky</i>      |                              |               |
| <i>PnlDC1</i>    |               | <i>PnlDC1</i>   | <i>PnlDC1</i>    |                              |               |
| <i>Pnliprp2</i>  |               | <i>Pnliprp2</i> |                  |                              |               |
| <i>Pnma1</i>     | <i>Pnma1</i>  |                 |                  |                              |               |
| <i>Pnma3</i>     |               |                 | <i>Pnma3</i>     |                              |               |
| <i>Pnma5</i>     |               |                 | <i>Pnma5</i>     |                              |               |
| <i>Pnmal1</i>    |               |                 | <i>Pnmal1</i>    |                              |               |
| <i>Pnmal2</i>    | <i>Pnmal2</i> |                 | <i>Pnmal2</i>    |                              |               |
| <i>Pno1</i>      |               |                 | <i>Pno1</i>      |                              |               |
| <i>Pnp</i>       |               |                 | <i>Pnp</i>       |                              |               |
| <i>Pnp2</i>      |               | <i>Pnp2</i>     |                  |                              |               |
| <i>Pnpla2</i>    |               | <i>Pnpla2</i>   |                  |                              |               |
| <i>Pnpla8</i>    |               | <i>Pnpla8</i>   |                  |                              |               |
| <i>Pnrc1</i>     |               |                 | <i>Pnrc1</i>     |                              |               |
| <i>Pnrc2</i>     |               | <i>Pnrc2</i>    |                  |                              |               |
| <i>Podn</i>      |               | <i>Podn</i>     |                  | <i>Podn</i>                  |               |
| <i>Podxl</i>     |               |                 | <i>Podxl</i>     |                              |               |
| <i>Podxl2</i>    |               | <i>Podxl2</i>   |                  |                              |               |
| <i>Pof1b</i>     |               |                 | <i>Pof1b</i>     |                              |               |
| <i>Pofut2</i>    |               |                 | <i>Pofut2</i>    |                              |               |
| <i>Poglut1</i>   |               |                 | <i>Poglut1</i>   |                              |               |
| <i>Pola1</i>     |               |                 | <i>Pola1</i>     |                              |               |



Suppl. Table 1  
(161/234)

|                  | ChIP-Seq hits |          |           | Unique hits with interactors |        |
|------------------|---------------|----------|-----------|------------------------------|--------|
|                  | unstimulated  | Ac       | LPS       | Ac                           | LPS    |
| <i>Pold1</i>     |               | Pold1    |           |                              |        |
| <i>Pold2</i>     |               | Pold2    | Pold2     |                              |        |
| <i>Pole3</i>     |               | Pole3    |           |                              |        |
| <i>Polg</i>      |               | Polg     |           |                              |        |
| <i>Poli</i>      |               |          | Poli      |                              |        |
| <i>Polm</i>      | Polm          | Polm     | Polm      |                              |        |
| <i>Polq</i>      |               | Polq     |           |                              |        |
| <i>Polr1b</i>    |               | Polr1b   |           | Polr1b                       |        |
| <i>Polr1e</i>    | Polr1e        |          |           |                              |        |
| <i>Polr2b</i>    |               | Polr2b   |           |                              |        |
| <i>Polr2c</i>    | Polr2c        |          |           |                              |        |
| <i>Polr2d</i>    | Polr2d        |          | Polr2d    |                              |        |
| <i>Polr2f</i>    |               | Polr2f   |           |                              |        |
| <i>Polr2g</i>    |               | Polr2g   |           |                              |        |
| <i>Polr2i</i>    |               | Polr2i   | Polr2i    |                              |        |
| <i>Polr2j</i>    |               |          | Polr2j    |                              |        |
| <i>Polr2k</i>    |               |          | Polr2k    |                              |        |
| <i>Polr2m</i>    |               |          | Polr2m    |                              |        |
| <i>Polr3a</i>    |               | Polr3a   |           | Polr3a                       |        |
| <i>Polr3c</i>    |               | Polr3c   | Polr3c    |                              |        |
| <i>Polr3g</i>    |               | Polr3g   |           |                              |        |
| <i>Polr3gl</i>   |               | Polr3gl  | Polr3gl   |                              |        |
| <i>Polr3h</i>    |               | Polr3h   |           |                              |        |
| <i>Pom121</i>    |               |          | Pom121    |                              |        |
| <i>Pom121l12</i> |               |          | Pom121l12 |                              |        |
| <i>Pomc</i>      |               | Pomc     |           | Pomc                         |        |
| <i>Pomk</i>      |               | Pomk     | Pomk      |                              |        |
| <i>Pomt2</i>     |               | Pomt2    |           |                              |        |
| <i>Pon1</i>      | Pon1          |          |           |                              |        |
| <i>Pon2</i>      | Pon2          |          | Pon2      |                              |        |
| <i>Pop1</i>      |               | Pop1     |           |                              |        |
| <i>Pop5</i>      |               | Pop5     | Pop5      |                              |        |
| <i>Pop7</i>      |               | Pop7     | Pop7      |                              |        |
| <i>Porcn</i>     | Porcn         | Porcn    | Porcn     |                              |        |
| <i>Postn</i>     |               |          | Postn     |                              |        |
| <i>Poteg</i>     |               | Poteg    |           |                              |        |
| <i>Pou2f1</i>    | Pou2f1        |          |           |                              |        |
| <i>Pou3f2</i>    |               | Pou3f2   | Pou3f2    |                              |        |
| <i>Pou4f3</i>    | Pou4f3        | Pou4f3   | Pou4f3    |                              |        |
| <i>Pou5f2</i>    |               | Pou5f2   | Pou5f2    |                              |        |
| <i>Pou6f1</i>    |               |          | Pou6f1    |                              |        |
| <i>Pp2d1</i>     |               |          | Pp2d1     |                              |        |
| <i>Ppa1</i>      |               | Ppa1     |           |                              |        |
| <i>Ppa2</i>      |               | Ppa2     |           |                              |        |
| <i>Ppan</i>      |               |          | Ppan      |                              |        |
| <i>Ppap2b</i>    |               |          | Ppap2b    |                              | Ppap2b |
| <i>Ppapdc1b</i>  | Ppapdc1b      | Ppapdc1b |           |                              |        |
| <i>Ppapdc2</i>   |               |          | Ppapdc2   |                              |        |
| <i>Ppapdc3</i>   |               |          | Ppapdc3   |                              |        |

Suppl. Table 1  
(162/234)

|                   | ChIP-Seq hits |            |          | Unique hits with interactors |         |
|-------------------|---------------|------------|----------|------------------------------|---------|
|                   | unstimulated  | Ac         | LPS      | Ac                           | LPS     |
| <i>Pparg</i>      | Pparg         | Pparg      |          |                              |         |
| <i>Ppargc1b</i>   | Ppargc1b      |            |          |                              |         |
| <i>Ppat</i>       |               | Ppat       |          |                              |         |
| <i>Ppbp</i>       |               | Ppbp       |          |                              |         |
| <i>Ppdpf</i>      |               |            | Ppdpf    |                              |         |
| <i>Ppef2</i>      |               | Ppef2      |          |                              |         |
| <i>Ppfia2</i>     |               |            | Ppfia2   |                              |         |
| <i>Ppfia4</i>     |               |            | Ppfia4   |                              |         |
| <i>Ppfibp1</i>    |               | Ppfibp1    |          |                              |         |
| <i>Pphln1</i>     |               |            | Pphln1   |                              | Pphln1  |
| <i>Ppic</i>       |               | Ppic       |          |                              |         |
| <i>Ppid</i>       | Ppid          |            |          |                              |         |
| <i>Ppifos</i>     |               | Ppifos     |          |                              |         |
| <i>Ppig</i>       |               |            | Ppig     |                              | Ppig    |
| <i>Ppil1</i>      |               |            | Ppil1    |                              |         |
| <i>Ppil3</i>      |               | Ppil3      | Ppil3    |                              |         |
| <i>Ppip5k1</i>    |               |            | Ppip5k1  |                              | Ppip5k1 |
| <i>Ppip5k2</i>    | Ppip5k2       |            |          |                              |         |
| <i>Ppl</i>        |               |            | Ppl      |                              |         |
| <i>Ppm1a</i>      |               |            | Ppm1a    |                              |         |
| <i>Ppm1e</i>      | Ppm1e         |            |          |                              |         |
| <i>Ppm1g</i>      |               |            | Ppm1g    |                              |         |
| <i>Ppm1j</i>      | Ppm1j         |            | Ppm1j    |                              |         |
| <i>Ppm1k</i>      |               | Ppm1k      | Ppm1k    |                              |         |
| <i>Ppm1n</i>      |               | Ppm1n      |          |                              |         |
| <i>Ppme1</i>      |               |            | Ppme1    |                              |         |
| <i>Ppox</i>       |               |            | Ppox     |                              |         |
| <i>Ppp1r10</i>    |               |            | Ppp1r10  |                              |         |
| <i>Ppp1r11</i>    |               | Ppp1r11    |          |                              |         |
| <i>Ppp1r12a</i>   |               | Ppp1r12a   |          |                              |         |
| <i>Ppp1r12c</i>   | Ppp1r12c      | Ppp1r12c   |          |                              |         |
| <i>Ppp1r13b</i>   |               | Ppp1r13b   | Ppp1r13b |                              |         |
| <i>Ppp1r14a</i>   |               | Ppp1r14a   |          | Ppp1r14a                     |         |
| <i>Ppp1r14b</i>   |               |            | Ppp1r14b |                              |         |
| <i>Ppp1r15a</i>   | Ppp1r15a      | Ppp1r15a   | Ppp1r15a |                              |         |
| <i>Ppp1r16a</i>   |               |            | Ppp1r16a |                              |         |
| <i>Ppp1r18</i>    |               | Ppp1r18    | Ppp1r18  |                              |         |
| <i>Ppp1r1c</i>    |               | Ppp1r1c    |          |                              |         |
| <i>Ppp1r2</i>     |               |            | Ppp1r2   |                              | Ppp1r2  |
| <i>Ppp1r21</i>    |               | Ppp1r21    |          |                              |         |
| <i>Ppp1r27</i>    | Ppp1r27       |            |          |                              |         |
| <i>Ppp1r2-ps9</i> |               | Ppp1r2-ps9 |          |                              |         |
| <i>Ppp1r37</i>    | Ppp1r37       | Ppp1r37    | Ppp1r37  |                              |         |
| <i>Ppp1r3a</i>    | Ppp1r3a       |            |          |                              |         |
| <i>Ppp1r3b</i>    |               |            | Ppp1r3b  |                              | Ppp1r3b |
| <i>Ppp1r3c</i>    | Ppp1r3c       |            |          |                              |         |
| <i>Ppp1r3e</i>    | Ppp1r3e       |            |          |                              |         |
| <i>Ppp1r3f</i>    |               | Ppp1r3f    |          |                              |         |
| <i>Ppp1r3fos</i>  |               | Ppp1r3fos  |          |                              |         |

Suppl. Table 1  
(163/234)

|                   | CHIP-Seq hits     |                |                 | Unique hits with interactors |                |
|-------------------|-------------------|----------------|-----------------|------------------------------|----------------|
|                   | unstimulated      | Ac             | LPS             | Ac                           | LPS            |
| <i>Ppp1r3g</i>    |                   | <i>Ppp1r3g</i> | <i>Ppp1r3g</i>  |                              |                |
| <i>Ppp1r42</i>    |                   | <i>Ppp1r42</i> |                 |                              |                |
| <i>Ppp1r7</i>     |                   | <i>Ppp1r7</i>  | <i>Ppp1r7</i>   |                              |                |
| <i>Ppp1r8</i>     |                   | <i>Ppp1r8</i>  | <i>Ppp1r8</i>   |                              |                |
| <i>Ppp2ca</i>     |                   | <i>Ppp2ca</i>  |                 |                              |                |
| <i>Ppp2cb</i>     |                   | <i>Ppp2cb</i>  | <i>Ppp2cb</i>   |                              |                |
| <i>Ppp2r1a</i>    |                   | <i>Ppp2r1a</i> |                 |                              |                |
| <i>Ppp2r1b</i>    |                   |                | <i>Ppp2r1b</i>  |                              | <i>Ppp2r1b</i> |
| <i>Ppp2r2a</i>    |                   |                | <i>Ppp2r2a</i>  |                              | <i>Ppp2r2a</i> |
| <i>Ppp2r2b</i>    |                   |                | <i>Ppp2r2b</i>  |                              |                |
| <i>Ppp2r2d</i>    |                   | <i>Ppp2r2d</i> |                 |                              |                |
| <i>Ppp2r3a</i>    |                   |                | <i>Ppp2r3a</i>  |                              |                |
| <i>Ppp2r3d</i>    |                   |                | <i>Ppp2r3d</i>  |                              | <i>Ppp2r3d</i> |
| <i>Ppp2r4</i>     | <i>Ppp2r4</i>     | <i>Ppp2r4</i>  |                 |                              |                |
| <i>Ppp2r5b</i>    | <i>Ppp2r5b</i>    |                | <i>Ppp2r5b</i>  |                              |                |
| <i>Ppp2r5c</i>    | <i>Ppp2r5c</i>    |                | <i>Ppp2r5c</i>  |                              |                |
| <i>Ppp2r5d</i>    |                   |                | <i>Ppp2r5d</i>  |                              |                |
| <i>Ppp3cc</i>     | <i>Ppp3cc</i>     | <i>Ppp3cc</i>  | <i>Ppp3cc</i>   |                              |                |
| <i>Ppp3r1</i>     |                   | <i>Ppp3r1</i>  |                 |                              |                |
| <i>Ppp4r1</i>     | <i>Ppp4r1</i>     | <i>Ppp4r1</i>  |                 |                              |                |
| <i>Ppp4r1l-ps</i> | <i>Ppp4r1l-ps</i> |                |                 |                              |                |
| <i>Ppp4r2</i>     |                   |                | <i>Ppp4r2</i>   |                              |                |
| <i>Ppp4r4</i>     | <i>Ppp4r4</i>     |                | <i>Ppp4r4</i>   |                              |                |
| <i>Ppp5c</i>      |                   | <i>Ppp5c</i>   |                 |                              |                |
| <i>Ppp6c</i>      |                   |                | <i>Ppp6c</i>    |                              | <i>Ppp6c</i>   |
| <i>Pprc1</i>      | <i>Pprc1</i>      |                | <i>Pprc1</i>    |                              |                |
| <i>Ppt1</i>       |                   | <i>Ppt1</i>    |                 |                              |                |
| <i>Pptc7</i>      |                   | <i>Pptc7</i>   |                 |                              |                |
| <i>Ppwd1</i>      |                   |                | <i>Ppwd1</i>    |                              |                |
| <i>Ppy</i>        |                   |                | <i>Ppy</i>      |                              |                |
| <i>Pqlc2</i>      | <i>Pqlc2</i>      |                |                 |                              |                |
| <i>Pqlc3</i>      | <i>Pqlc3</i>      |                |                 |                              |                |
| <i>Pradc1</i>     |                   | <i>Pradc1</i>  |                 |                              |                |
| <i>Prame</i>      |                   | <i>Prame</i>   |                 |                              |                |
| <i>Pramef12</i>   |                   |                | <i>Pramef12</i> |                              |                |
| <i>Pramef25</i>   | <i>Pramef25</i>   |                |                 |                              |                |
| <i>Pramef8</i>    |                   |                | <i>Pramef8</i>  |                              | <i>Pramef8</i> |
| <i>Pramel1</i>    | <i>Pramel1</i>    | <i>Pramel1</i> | <i>Pramel1</i>  |                              |                |
| <i>Pramel4</i>    | <i>Pramel4</i>    | <i>Pramel4</i> | <i>Pramel4</i>  |                              |                |
| <i>Pramel6</i>    |                   |                | <i>Pramel6</i>  |                              |                |
| <i>Pramel7</i>    | <i>Pramel7</i>    | <i>Pramel7</i> | <i>Pramel7</i>  |                              |                |
| <i>Prap1</i>      |                   | <i>Prap1</i>   |                 |                              |                |
| <i>Prb1</i>       |                   |                | <i>Prb1</i>     |                              |                |
| <i>Prc1</i>       |                   |                | <i>Prc1</i>     |                              |                |
| <i>Prcc</i>       |                   |                | <i>Prcc</i>     |                              |                |
| <i>Prcp</i>       |                   |                | <i>Prcp</i>     |                              |                |
| <i>Prdm1</i>      |                   |                | <i>Prdm1</i>    |                              | <i>Prdm1</i>   |
| <i>Prdm10</i>     |                   |                | <i>Prdm10</i>   |                              |                |
| <i>Prdm13</i>     | <i>Prdm13</i>     | <i>Prdm13</i>  | <i>Prdm13</i>   |                              |                |

Suppl. Table 1  
(164/234)

|                  | CHIP-Seq hits    |                  |                  | Unique hits with interactors |              |
|------------------|------------------|------------------|------------------|------------------------------|--------------|
|                  | unstimulated     | Ac               | LPS              | Ac                           | LPS          |
| <i>Prdm14</i>    |                  |                  | <i>Prdm14</i>    |                              |              |
| <i>Prdm16</i>    |                  | <i>Prdm16</i>    |                  | <i>Prdm16</i>                |              |
| <i>Prdm2</i>     |                  |                  | <i>Prdm2</i>     |                              |              |
| <i>Prdm4</i>     |                  |                  | <i>Prdm4</i>     |                              |              |
| <i>Prdm5</i>     | <i>Prdm5</i>     |                  |                  |                              |              |
| <i>Prdm6</i>     |                  |                  | <i>Prdm6</i>     |                              |              |
| <i>Prdm8</i>     |                  |                  | <i>Prdm8</i>     |                              |              |
| <i>Prdm9</i>     | <i>Prdm9</i>     |                  |                  |                              |              |
| <i>Prdx1</i>     | <i>Prdx1</i>     |                  | <i>Prdx1</i>     |                              |              |
| <i>Prdx3</i>     |                  |                  | <i>Prdx3</i>     |                              |              |
| <i>Prdx4</i>     | <i>Prdx4</i>     |                  |                  |                              |              |
| <i>Prdx5</i>     |                  | <i>Prdx5</i>     |                  |                              |              |
| <i>Prdx6</i>     |                  | <i>Prdx6</i>     |                  | <i>Prdx6</i>                 |              |
| <i>Prdx6b</i>    | <i>Prdx6b</i>    | <i>Prdx6b</i>    | <i>Prdx6b</i>    |                              |              |
| <i>Prelid2</i>   |                  |                  | <i>Prelid2</i>   |                              |              |
| <i>Prelp</i>     |                  | <i>Prelp</i>     |                  |                              |              |
| <i>Prep</i>      | <i>Prep</i>      | <i>Prep</i>      | <i>Prep</i>      |                              |              |
| <i>Prex1</i>     | <i>Prex1</i>     |                  |                  |                              |              |
| <i>Prex2</i>     | <i>Prex2</i>     | <i>Prex2</i>     | <i>Prex2</i>     |                              |              |
| <i>Prf1</i>      |                  |                  | <i>Prf1</i>      |                              | <i>Prf1</i>  |
| <i>Prg3</i>      |                  |                  | <i>Prg3</i>      |                              |              |
| <i>Prickle1</i>  |                  | <i>Prickle1</i>  |                  | <i>Prickle1</i>              |              |
| <i>Prickle2</i>  | <i>Prickle2</i>  |                  |                  |                              |              |
| <i>Prickle4</i>  |                  | <i>Prickle4</i>  | <i>Prickle4</i>  |                              |              |
| <i>Prim1</i>     |                  |                  | <i>Prim1</i>     |                              |              |
| <i>Primpol</i>   |                  | <i>Primpol</i>   |                  |                              |              |
| <i>Prkaa1</i>    | <i>Prkaa1</i>    | <i>Prkaa1</i>    | <i>Prkaa1</i>    |                              |              |
| <i>Prkab2</i>    |                  | <i>Prkab2</i>    | <i>Prkab2</i>    |                              |              |
| <i>Prkaca</i>    |                  | <i>Prkaca</i>    |                  | <i>Prkaca</i>                |              |
| <i>Prkacb</i>    |                  | <i>Prkacb</i>    | <i>Prkacb</i>    |                              |              |
| <i>Prkag1</i>    |                  |                  | <i>Prkag1</i>    |                              |              |
| <i>Prkag2os1</i> | <i>Prkag2os1</i> | <i>Prkag2os1</i> | <i>Prkag2os1</i> |                              |              |
| <i>Prkar2b</i>   | <i>Prkar2b</i>   | <i>Prkar2b</i>   | <i>Prkar2b</i>   |                              |              |
| <i>Prkca</i>     |                  |                  | <i>Prkca</i>     |                              | <i>Prkca</i> |
| <i>Prkcb</i>     | <i>Prkcb</i>     | <i>Prkcb</i>     |                  |                              |              |
| <i>Prkcd</i>     |                  | <i>Prkcd</i>     |                  | <i>Prkcd</i>                 |              |
| <i>Prkcdbp</i>   |                  | <i>Prkcdbp</i>   |                  |                              |              |
| <i>Prkcg</i>     | <i>Prkcg</i>     | <i>Prkcg</i>     |                  |                              |              |
| <i>Prkcsh</i>    |                  | <i>Prkcsh</i>    |                  |                              |              |
| <i>Prkd3</i>     |                  | <i>Prkd3</i>     |                  |                              |              |
| <i>Prkdc</i>     | <i>Prkdc</i>     | <i>Prkdc</i>     |                  |                              |              |
| <i>Prkg1</i>     |                  | <i>Prkg1</i>     | <i>Prkg1</i>     |                              |              |
| <i>Prkg2</i>     |                  |                  | <i>Prkg2</i>     |                              | <i>Prkg2</i> |
| <i>Prkra</i>     |                  | <i>Prkra</i>     | <i>Prkra</i>     |                              |              |
| <i>Prkrip1</i>   | <i>Prkrip1</i>   |                  | <i>Prkrip1</i>   |                              |              |
| <i>Prkx</i>      |                  |                  | <i>Prkx</i>      |                              |              |
| <i>Prl2a1</i>    |                  |                  | <i>Prl2a1</i>    |                              |              |
| <i>Prl2b1</i>    |                  | <i>Prl2b1</i>    |                  |                              |              |
| <i>Prl2c1</i>    |                  | <i>Prl2c1</i>    |                  |                              |              |

Suppl. Table 1  
(165/234)

|                | CHIP-Seq hits  |                |                | Unique hits with interactors |     |
|----------------|----------------|----------------|----------------|------------------------------|-----|
|                | unstimulated   | Ac             | LPS            | Ac                           | LPS |
| <i>Prl2c2</i>  |                | <i>Prl2c2</i>  |                | <i>Prl2c2</i>                |     |
| <i>Prl2c3</i>  |                | <i>Prl2c3</i>  | <i>Prl2c3</i>  |                              |     |
| <i>Prl2c4</i>  |                | <i>Prl2c4</i>  | <i>Prl2c4</i>  |                              |     |
| <i>Prl2c5</i>  |                | <i>Prl2c5</i>  |                |                              |     |
| <i>Prl3a1</i>  | <i>Prl3a1</i>  |                |                |                              |     |
| <i>Prl3c1</i>  |                |                | <i>Prl3c1</i>  |                              |     |
| <i>Prl3d1</i>  |                |                | <i>Prl3d1</i>  |                              |     |
| <i>Prl3d2</i>  |                | <i>Prl3d2</i>  | <i>Prl3d2</i>  |                              |     |
| <i>Prl3d3</i>  |                | <i>Prl3d3</i>  |                |                              |     |
| <i>Prl4a1</i>  |                | <i>Prl4a1</i>  |                |                              |     |
| <i>Prl7a2</i>  |                | <i>Prl7a2</i>  |                |                              |     |
| <i>Prl7d1</i>  | <i>Prl7d1</i>  |                |                |                              |     |
| <i>Prl8a6</i>  |                | <i>Prl8a6</i>  |                |                              |     |
| <i>Prl8a8</i>  |                | <i>Prl8a8</i>  | <i>Prl8a8</i>  |                              |     |
| <i>Prl8a9</i>  |                | <i>Prl8a9</i>  |                |                              |     |
| <i>Prm3</i>    |                | <i>Prm3</i>    |                |                              |     |
| <i>Prmt1</i>   |                |                | <i>Prmt1</i>   |                              |     |
| <i>Prmt10</i>  |                |                | <i>Prmt10</i>  |                              |     |
| <i>Prmt5</i>   |                |                | <i>Prmt5</i>   |                              |     |
| <i>Prmt7</i>   |                |                | <i>Prmt7</i>   |                              |     |
| <i>Prn</i>     | <i>Prn</i>     | <i>Prn</i>     |                |                              |     |
| <i>Proca1</i>  |                | <i>Proca1</i>  |                |                              |     |
| <i>Prodh</i>   | <i>Prodh</i>   |                |                |                              |     |
| <i>Prokr1</i>  | <i>Prokr1</i>  | <i>Prokr1</i>  |                |                              |     |
| <i>Prol1</i>   | <i>Prol1</i>   |                |                |                              |     |
| <i>Pros1</i>   |                | <i>Pros1</i>   | <i>Pros1</i>   |                              |     |
| <i>Proser2</i> | <i>Proser2</i> |                |                |                              |     |
| <i>Prox1</i>   |                | <i>Prox1</i>   |                |                              |     |
| <i>Prox2</i>   |                | <i>Prox2</i>   |                |                              |     |
| <i>Proz</i>    | <i>Proz</i>    |                |                |                              |     |
| <i>Prp2</i>    |                |                | <i>Prp2</i>    |                              |     |
| <i>Prpf3</i>   |                |                | <i>Prpf3</i>   |                              |     |
| <i>Prpf38a</i> | <i>Prpf38a</i> |                |                |                              |     |
| <i>Prpf38b</i> |                |                | <i>Prpf38b</i> |                              |     |
| <i>Prpf4b</i>  |                | <i>Prpf4b</i>  | <i>Prpf4b</i>  |                              |     |
| <i>Prpf8</i>   |                | <i>Prpf8</i>   | <i>Prpf8</i>   |                              |     |
| <i>Prph</i>    |                |                | <i>Prph</i>    |                              |     |
| <i>Prps1</i>   |                | <i>Prps1</i>   |                |                              |     |
| <i>Prpsap2</i> | <i>Prpsap2</i> |                |                |                              |     |
| <i>Prr13</i>   |                |                | <i>Prr13</i>   |                              |     |
| <i>Prr14l</i>  | <i>Prr14l</i>  | <i>Prr14l</i>  |                |                              |     |
| <i>Prr15l</i>  |                |                | <i>Prr15l</i>  |                              |     |
| <i>Prr19</i>   |                | <i>Prr19</i>   |                |                              |     |
| <i>Prr22</i>   |                |                | <i>Prr22</i>   |                              |     |
| <i>Prr23a1</i> |                | <i>Prr23a1</i> |                |                              |     |
| <i>Prr30</i>   |                | <i>Prr30</i>   |                |                              |     |
| <i>Prr32</i>   | <i>Prr32</i>   |                |                |                              |     |
| <i>Prr5</i>    | <i>Prr5</i>    |                | <i>Prr5</i>    |                              |     |
| <i>Prr9</i>    | <i>Prr9</i>    | <i>Prr9</i>    |                |                              |     |

Suppl. Table 1  
(166/234)

|               | ChIP-Seq hits |        |        | Unique hits with interactors |     |
|---------------|---------------|--------|--------|------------------------------|-----|
|               | unstimulated  | Ac     | LPS    | Ac                           | LPS |
| <i>Prrc2a</i> |               | Prrc2a |        |                              |     |
| <i>Prrc2b</i> |               |        | Prrc2b |                              |     |
| <i>Prrg1</i>  |               |        | Prrg1  |                              |     |
| <i>Prrg4</i>  |               |        | Prrg4  |                              |     |
| <i>Prrt1</i>  |               | Prrt1  |        |                              |     |
| <i>Prrt2</i>  |               | Prrt2  |        |                              |     |
| <i>Prrt3</i>  | Prrt3         |        |        |                              |     |
| <i>Prrx1</i>  |               | Prrx1  |        | Prrx1                        |     |
| <i>Prss22</i> |               |        | Prss22 |                              |     |
| <i>Prss28</i> | Prss28        |        |        |                              |     |
| <i>Prss32</i> |               | Prss32 | Prss32 |                              |     |
| <i>Prss36</i> |               | Prss36 |        |                              |     |
| <i>Prss37</i> |               | Prss37 | Prss37 |                              |     |
| <i>Prss42</i> |               | Prss42 |        |                              |     |
| <i>Prss44</i> | Prss44        | Prss44 | Prss44 |                              |     |
| <i>Prss45</i> |               |        | Prss45 |                              |     |
| <i>Prss50</i> | Prss50        |        |        |                              |     |
| <i>Prss52</i> |               | Prss52 |        |                              |     |
| <i>Prss8</i>  |               |        | Prss8  |                              |     |
| <i>Prtn3</i>  |               |        | Prtn3  |                              |     |
| <i>Prune2</i> | Prune2        |        |        |                              |     |
| <i>Psap</i>   | Psap          | Psap   | Psap   |                              |     |
| <i>Psapl1</i> |               |        | Psapl1 |                              |     |
| <i>Psat1</i>  |               | Psat1  | Psat1  |                              |     |
| <i>Psd3</i>   | Psd3          | Psd3   | Psd3   |                              |     |
| <i>Psg16</i>  |               | Psg16  |        |                              |     |
| <i>Psg17</i>  |               | Psg17  |        |                              |     |
| <i>Psg19</i>  |               | Psg19  |        |                              |     |
| <i>Psg20</i>  |               |        | Psg20  |                              |     |
| <i>Psg23</i>  | Psg23         |        |        |                              |     |
| <i>Psg27</i>  |               | Psg27  |        |                              |     |
| <i>Psg28</i>  |               |        | Psg28  |                              |     |
| <i>Psg29</i>  |               |        | Psg29  |                              |     |
| <i>Psip1</i>  | Psip1         | Psip1  | Psip1  |                              |     |
| <i>Psm1</i>   |               |        | Psm1   |                              |     |
| <i>Psm3</i>   |               |        | Psm3   |                              |     |
| <i>Psm4</i>   | Psm4          | Psm4   | Psm4   |                              |     |
| <i>Psm5</i>   |               | Psm5   |        |                              |     |
| <i>Psm1</i>   |               | Psm1   | Psm1   |                              |     |
| <i>Psm2</i>   |               | Psm2   | Psm2   |                              |     |
| <i>Psm4</i>   |               |        | Psm4   |                              |     |
| <i>Psm5</i>   | Psm5          |        |        |                              |     |
| <i>Psm8</i>   |               |        | Psm8   |                              |     |
| <i>Psmc1</i>  |               | Psmc1  |        |                              |     |
| <i>Psmc2</i>  |               |        | Psmc2  |                              |     |
| <i>Psmc6</i>  |               | Psmc6  | Psmc6  |                              |     |
| <i>Psm11</i>  |               | Psm11  | Psm11  |                              |     |
| <i>Psm12</i>  | Psm12         |        | Psm12  |                              |     |
| <i>Psm14</i>  |               | Psm14  |        |                              |     |

Suppl. Table 1  
(167/234)

|                 | CHIP-Seq hits  |                 |                 | Unique hits with interactors |                |
|-----------------|----------------|-----------------|-----------------|------------------------------|----------------|
|                 | unstimulated   | Ac              | LPS             | Ac                           | LPS            |
| <i>Psmc2</i>    |                | <i>Psmc2</i>    | <i>Psmc2</i>    |                              |                |
| <i>Psmc5</i>    | <i>Psmc5</i>   |                 |                 |                              |                |
| <i>Psmc6</i>    |                | <i>Psmc6</i>    | <i>Psmc6</i>    |                              |                |
| <i>Psmc7</i>    | <i>Psmc7</i>   | <i>Psmc7</i>    | <i>Psmc7</i>    |                              |                |
| <i>Psme2b</i>   |                |                 | <i>Psme2b</i>   |                              |                |
| <i>Psme3</i>    |                |                 | <i>Psme3</i>    |                              |                |
| <i>Psmf1</i>    | <i>Psmf1</i>   | <i>Psmf1</i>    | <i>Psmf1</i>    |                              |                |
| <i>Psmg2</i>    |                | <i>Psmg2</i>    | <i>Psmg2</i>    |                              |                |
| <i>Psors1c2</i> |                | <i>Psors1c2</i> |                 |                              |                |
| <i>Pspc1</i>    |                |                 | <i>Pspc1</i>    |                              |                |
| <i>Psph</i>     |                |                 | <i>Psph</i>     |                              |                |
| <i>Pspn</i>     |                |                 | <i>Pspn</i>     |                              |                |
| <i>Pstpip2</i>  |                |                 | <i>Pstpip2</i>  |                              | <i>Pstpip2</i> |
| <i>Ptafr</i>    | <i>Ptafr</i>   |                 | <i>Ptafr</i>    |                              |                |
| <i>Ptbp3</i>    | <i>Ptbp3</i>   |                 | <i>Ptbp3</i>    |                              |                |
| <i>Ptcd1</i>    | <i>Ptcd1</i>   | <i>Ptcd1</i>    | <i>Ptcd1</i>    |                              |                |
| <i>Ptcd2</i>    |                |                 | <i>Ptcd2</i>    |                              |                |
| <i>Ptch1</i>    |                |                 | <i>Ptch1</i>    |                              |                |
| <i>Ptchd4</i>   |                |                 | <i>Ptchd4</i>   |                              |                |
| <i>Pten</i>     | <i>Pten</i>    | <i>Pten</i>     |                 |                              |                |
| <i>Pter</i>     |                |                 | <i>Pter</i>     |                              | <i>Pter</i>    |
| <i>Ptf1aos</i>  | <i>Ptf1aos</i> |                 | <i>Ptf1aos</i>  |                              |                |
| <i>Ptgds</i>    |                |                 | <i>Ptgds</i>    |                              |                |
| <i>Ptges</i>    |                | <i>Ptges</i>    |                 |                              |                |
| <i>Ptges2</i>   | <i>Ptges2</i>  |                 | <i>Ptges2</i>   |                              |                |
| <i>Ptges3l</i>  |                |                 | <i>Ptges3l</i>  |                              |                |
| <i>Ptgfr</i>    |                | <i>Ptgfr</i>    |                 | <i>Ptgfr</i>                 |                |
| <i>Ptgfrn</i>   |                | <i>Ptgfrn</i>   |                 |                              |                |
| <i>Ptgr1</i>    | <i>Ptgr1</i>   |                 |                 |                              |                |
| <i>Ptgr2</i>    |                | <i>Ptgr2</i>    |                 |                              |                |
| <i>Ptgs2</i>    |                |                 | <i>Ptgs2</i>    |                              | <i>Ptgs2</i>   |
| <i>Ptgs2os2</i> |                | <i>Ptgs2os2</i> | <i>Ptgs2os2</i> |                              |                |
| <i>Pth</i>      | <i>Pth</i>     | <i>Pth</i>      |                 |                              |                |
| <i>Pth1r</i>    |                |                 | <i>Pth1r</i>    |                              |                |
| <i>Pth2</i>     | <i>Pth2</i>    |                 |                 |                              |                |
| <i>Ptk2</i>     |                | <i>Ptk2</i>     | <i>Ptk2</i>     |                              |                |
| <i>Ptk7</i>     |                |                 | <i>Ptk7</i>     |                              |                |
| <i>Ptma</i>     |                | <i>Ptma</i>     | <i>Ptma</i>     |                              |                |
| <i>Ptms</i>     |                |                 | <i>Ptms</i>     |                              |                |
| <i>Ptov1</i>    |                |                 | <i>Ptov1</i>    |                              |                |
| <i>Ptp4a1</i>   |                | <i>Ptp4a1</i>   | <i>Ptp4a1</i>   |                              |                |
| <i>Ptp4a2</i>   |                | <i>Ptp4a2</i>   | <i>Ptp4a2</i>   |                              |                |
| <i>Ptpdc1</i>   | <i>Ptpdc1</i>  |                 |                 |                              |                |
| <i>Ptpmt1</i>   |                | <i>Ptpmt1</i>   |                 |                              |                |
| <i>Ptpn11</i>   | <i>Ptpn11</i>  |                 |                 |                              |                |
| <i>Ptpn12</i>   |                | <i>Ptpn12</i>   |                 |                              |                |
| <i>Ptpn21</i>   | <i>Ptpn21</i>  |                 |                 |                              |                |
| <i>Ptpn22</i>   |                | <i>Ptpn22</i>   |                 |                              |                |
| <i>Ptpn3</i>    |                |                 | <i>Ptpn3</i>    |                              |                |

Suppl. Table 1  
(168/234)

|                | ChIP-Seq hits |        |         | Unique hits with interactors |       |
|----------------|---------------|--------|---------|------------------------------|-------|
|                | unstimulated  | Ac     | LPS     | Ac                           | LPS   |
| <i>Ptpn4</i>   |               |        | Ptpn4   |                              |       |
| <i>Ptpn5</i>   |               | Ptpn5  |         |                              |       |
| <i>Ptpn6</i>   | Ptpn6         | Ptpn6  | Ptpn6   |                              |       |
| <i>Ptpn7</i>   |               |        | Ptpn7   |                              | Ptpn7 |
| <i>Ptprc</i>   | Ptprc         | Ptprc  | Ptprc   |                              |       |
| <i>Ptprcap</i> |               |        | Ptprcap |                              |       |
| <i>Ptprd</i>   |               | Ptprd  |         | Ptprd                        |       |
| <i>Ptprf</i>   | Ptprf         |        | Ptprf   |                              |       |
| <i>Ptprg</i>   | Ptprg         | Ptprg  |         |                              |       |
| <i>Ptprj</i>   | Ptprj         | Ptprj  | Ptprj   |                              |       |
| <i>Ptprk</i>   |               | Ptprk  |         | Ptprk                        |       |
| <i>Ptprn</i>   |               |        | Ptprn   |                              |       |
| <i>Ptpro</i>   |               |        | Ptpro   |                              | Ptpro |
| <i>Ptprp</i>   |               | Ptprp  | Ptprp   |                              |       |
| <i>Ptprs</i>   | Ptprs         |        |         |                              |       |
| <i>Ptpru</i>   |               | Ptpru  |         | Ptpru                        |       |
| <i>Ptprv</i>   |               |        | Ptprv   |                              |       |
| <i>Ptprz1</i>  |               | Ptprz1 |         |                              |       |
| <i>Ptrf</i>    | Ptrf          |        |         |                              |       |
| <i>Ptrh2</i>   |               |        | Ptrh2   |                              |       |
| <i>Pts</i>     | Pts           |        |         |                              |       |
| <i>Ptx3</i>    | Ptx3          |        |         |                              |       |
| <i>Ptx4</i>    |               | Ptx4   |         |                              |       |
| <i>Puf60</i>   |               | Puf60  | Puf60   |                              |       |
| <i>Pum1</i>    |               |        | Pum1    |                              | Pum1  |
| <i>Pum2</i>    |               |        | Pum2    |                              |       |
| <i>Purg</i>    |               | Purg   |         |                              |       |
| <i>Pus1</i>    |               |        | Pus1    |                              |       |
| <i>Pus10</i>   |               |        | Pus10   |                              |       |
| <i>Pus3</i>    | Pus3          | Pus3   | Pus3    |                              |       |
| <i>Pus7l</i>   |               | Pus7l  |         |                              |       |
| <i>Pvalb</i>   |               | Pvalb  |         |                              |       |
| <i>Pvr</i>     |               | Pvr    |         |                              |       |
| <i>Pvrl3</i>   |               |        | Pvrl3   |                              |       |
| <i>Pvrl4</i>   |               | Pvrl4  |         | Pvrl4                        |       |
| <i>Pvt1</i>    | Pvt1          |        |         |                              |       |
| <i>Pwp2</i>    |               |        | Pwp2    |                              |       |
| <i>Pwwp2a</i>  | Pwwp2a        | Pwwp2a |         |                              |       |
| <i>Pwwp2b</i>  |               | Pwwp2b |         |                              |       |
| <i>Pxdc1</i>   |               |        | Pxdc1   |                              |       |
| <i>Pxdn</i>    |               | Pxdn   |         |                              |       |
| <i>Pxk</i>     | Pxk           |        | Pxk     |                              |       |
| <i>Pxmp4</i>   |               |        | Pxmp4   |                              | Pxmp4 |
| <i>Pxn</i>     |               |        | Pxn     |                              |       |
| <i>Pxt1</i>    |               | Pxt1   | Pxt1    |                              |       |
| <i>Pxylp1</i>  |               |        | Pxylp1  |                              |       |
| <i>Pycard</i>  |               |        | Pycard  |                              |       |
| <i>Pycr2</i>   |               |        | Pycr2   |                              |       |
| <i>Pydc3</i>   | Pydc3         | Pydc3  |         |                              |       |



Suppl. Table 1  
(169/234)

|                     | CHIP-Seq hits |              |              | Unique hits with interactors |           |
|---------------------|---------------|--------------|--------------|------------------------------|-----------|
|                     | unstimulated  | Ac           | LPS          | Ac                           | LPS       |
| <i>Pygb</i>         |               | Pygb         | Pygb         |                              |           |
| <i>Pyhin1</i>       | Pyhin1        |              |              |                              |           |
| <i>Pyy</i>          | Pyy           | Pyy          |              |                              |           |
| <i>Pzp</i>          |               |              | Pzp          |                              |           |
| <i>Qars</i>         |               | Qars         | Qars         |                              |           |
| <i>Qdpr</i>         |               |              | Qdpr         |                              |           |
| <i>Qtrt1</i>        |               | Qtrt1        |              |                              |           |
| <i>Qtrtd1</i>       |               | Qtrtd1       |              |                              |           |
| <i>R3hcc1l</i>      | R3hcc1l       | R3hcc1l      | R3hcc1l      |                              |           |
| <i>R3hdm1</i>       |               | R3hdm1       | R3hdm1       |                              |           |
| <i>R3hdm2</i>       |               | R3hdm2       | R3hdm2       |                              |           |
| <i>R3hdml</i>       |               |              | R3hdml       |                              |           |
| <i>Rab10os</i>      |               |              | Rab10os      |                              |           |
| <i>Rab11a</i>       |               | Rab11a       |              | Rab11a                       |           |
| <i>Rab11b</i>       | Rab11b        | Rab11b       | Rab11b       |                              |           |
| <i>Rab11fip1</i>    |               |              | Rab11fip1    |                              | Rab11fip1 |
| <i>Rab11fip3</i>    |               | Rab11fip3    | Rab11fip3    |                              |           |
| <i>Rab11fip4os1</i> |               | Rab11fip4os1 |              |                              |           |
| <i>Rab11fip4os2</i> |               |              | Rab11fip4os2 |                              |           |
| <i>Rab11fip5</i>    |               |              | Rab11fip5    |                              | Rab11fip5 |
| <i>Rab12</i>        |               | Rab12        |              |                              |           |
| <i>Rab13</i>        | Rab13         |              | Rab13        |                              |           |
| <i>Rab14</i>        | Rab14         |              | Rab14        |                              |           |
| <i>Rab18</i>        |               |              | Rab18        |                              |           |
| <i>Rab19</i>        | Rab19         | Rab19        |              |                              |           |
| <i>Rab1b</i>        |               | Rab1b        |              |                              |           |
| <i>Rab21</i>        |               | Rab21        |              | Rab21                        |           |
| <i>Rab23</i>        | Rab23         | Rab23        |              |                              |           |
| <i>Rab24</i>        |               |              | Rab24        |                              |           |
| <i>Rab25</i>        |               | Rab25        |              |                              |           |
| <i>Rab27a</i>       | Rab27a        |              |              |                              |           |
| <i>Rab27b</i>       |               |              | Rab27b       |                              | Rab27b    |
| <i>Rab29</i>        |               |              | Rab29        |                              |           |
| <i>Rab2b</i>        | Rab2b         | Rab2b        | Rab2b        |                              |           |
| <i>Rab31</i>        | Rab31         | Rab31        | Rab31        |                              |           |
| <i>Rab32</i>        |               | Rab32        |              |                              |           |
| <i>Rab34</i>        | Rab34         | Rab34        | Rab34        |                              |           |
| <i>Rab36</i>        |               |              | Rab36        |                              |           |
| <i>Rab38</i>        |               |              | Rab38        |                              |           |
| <i>Rab39b</i>       |               |              | Rab39b       |                              |           |
| <i>Rab3a</i>        | Rab3a         |              |              |                              |           |
| <i>Rab3b</i>        |               |              | Rab3b        |                              |           |
| <i>Rab3d</i>        | Rab3d         | Rab3d        | Rab3d        |                              |           |
| <i>Rab3gap1</i>     | Rab3gap1      | Rab3gap1     | Rab3gap1     |                              |           |
| <i>Rab3gap2</i>     |               |              | Rab3gap2     |                              | Rab3gap2  |
| <i>Rab3ip</i>       |               | Rab3ip       | Rab3ip       |                              |           |
| <i>Rab40b</i>       |               |              | Rab40b       |                              |           |
| <i>Rab40c</i>       |               | Rab40c       |              |                              |           |
| <i>Rab43</i>        |               | Rab43        |              |                              |           |

Suppl. Table 1  
(170/234)

|                 | CHIP-Seq hits |          |          | Unique hits with interactors |         |
|-----------------|---------------|----------|----------|------------------------------|---------|
|                 | unstimulated  | Ac       | LPS      | Ac                           | LPS     |
| <i>Rab44</i>    |               | Rab44    | Rab44    |                              |         |
| <i>Rab4a</i>    | Rab4a         | Rab4a    | Rab4a    |                              |         |
| <i>Rab4b</i>    |               | Rab4b    |          |                              |         |
| <i>Rab5b</i>    |               |          | Rab5b    |                              | Rab5b   |
| <i>Rab6a</i>    |               |          | Rab6a    |                              |         |
| <i>Rab6b</i>    |               |          | Rab6b    |                              | Rab6b   |
| <i>Rab7</i>     | Rab7          |          |          |                              |         |
| <i>Rab9b</i>    |               |          | Rab9b    |                              | Rab9b   |
| <i>Rabep1</i>   | Rabep1        |          | Rabep1   |                              |         |
| <i>Rabepk</i>   |               |          | Rabepk   |                              |         |
| <i>Rabgap1l</i> |               | Rabgap1l | Rabgap1l |                              |         |
| <i>Rabgef1</i>  | Rabgef1       |          |          |                              |         |
| <i>Rabggta</i>  |               |          | Rabggta  |                              | Rabggta |
| <i>Rab13</i>    |               |          | Rab13    |                              |         |
| <i>Rab16</i>    |               |          | Rab16    |                              |         |
| <i>Rac1</i>     |               | Rac1     | Rac1     |                              |         |
| <i>Rac3</i>     |               | Rac3     |          |                              |         |
| <i>Racgap1</i>  |               |          | Racgap1  |                              |         |
| <i>Rad1</i>     |               |          | Rad1     |                              | Rad1    |
| <i>Rad17</i>    |               | Rad17    |          |                              |         |
| <i>Rad21</i>    | Rad21         |          |          |                              |         |
| <i>Rad21l</i>   |               | Rad21l   |          |                              |         |
| <i>Rad50</i>    |               | Rad50    | Rad50    |                              |         |
| <i>Rad51</i>    |               |          | Rad51    |                              |         |
| <i>Rad51c</i>   |               |          | Rad51c   |                              | Rad51c  |
| <i>Rad51d</i>   |               |          | Rad51d   |                              | Rad51d  |
| <i>Rad54l</i>   |               | Rad54l   | Rad54l   |                              |         |
| <i>Rad9b</i>    | Rad9b         |          |          |                              |         |
| <i>Raet1a</i>   |               | Raet1a   |          |                              |         |
| <i>Raet1b</i>   |               | Raet1b   |          |                              |         |
| <i>Raet1c</i>   |               | Raet1c   |          |                              |         |
| <i>Raet1e</i>   |               | Raet1e   |          |                              |         |
| <i>Rag2</i>     |               | Rag2     |          | Rag2                         |         |
| <i>Rai1</i>     |               | Rai1     |          | Rai1                         |         |
| <i>Rai14</i>    | Rai14         |          |          |                              |         |
| <i>Ralb</i>     |               | Ralb     |          |                              |         |
| <i>Ralgapa1</i> |               | Ralgapa1 |          |                              |         |
| <i>Ralgapa2</i> |               | Ralgapa2 |          |                              |         |
| <i>Ralgapb</i>  | Ralgapb       | Ralgapb  | Ralgapb  |                              |         |
| <i>Ralgps1</i>  | Ralgps1       |          |          |                              |         |
| <i>Ralgps2</i>  |               | Ralgps2  | Ralgps2  |                              |         |
| <i>Raly</i>     |               |          | Raly     |                              |         |
| <i>Ralyl</i>    | Ralyl         | Ralyl    | Ralyl    |                              |         |
| <i>Ramp1</i>    | Ramp1         |          |          |                              |         |
| <i>Ramp2</i>    |               |          | Ramp2    |                              |         |
| <i>Ran</i>      |               |          | Ran      |                              |         |
| <i>Ranbp1</i>   |               | Ranbp1   | Ranbp1   |                              |         |
| <i>Ranbp10</i>  |               | Ranbp10  | Ranbp10  |                              |         |
| <i>Ranbp17</i>  |               | Ranbp17  |          | Ranbp17                      |         |

Suppl. Table 1  
(171/234)

|                 | CHIP-Seq hits |          |         | Unique hits with interactors |         |
|-----------------|---------------|----------|---------|------------------------------|---------|
|                 | unstimulated  | Ac       | LPS     | Ac                           | LPS     |
| <i>Ranbp3</i>   |               |          | Ranbp3  |                              |         |
| <i>Ranbp6</i>   |               | Ranbp6   |         |                              |         |
| <i>Ranbp9</i>   |               | Ranbp9   | Ranbp9  |                              |         |
| <i>Rangap1</i>  |               |          | Rangap1 |                              | Rangap1 |
| <i>Rangrf</i>   |               | Rangrf   |         |                              |         |
| <i>Rap1a</i>    | Rap1a         |          |         |                              |         |
| <i>Rap1gap</i>  |               | Rap1gap  | Rap1gap |                              |         |
| <i>Rap1gap2</i> |               | Rap1gap2 |         | Rap1gap2                     |         |
| <i>Rap1gds1</i> |               | Rap1gds1 |         | Rap1gds1                     |         |
| <i>Rapgef1</i>  |               | Rapgef1  | Rapgef1 |                              |         |
| <i>Rapgef4</i>  |               | Rapgef4  |         |                              |         |
| <i>Rapgef5</i>  |               | Rapgef5  |         |                              |         |
| <i>Raph1</i>    |               |          | Raph1   |                              |         |
| <i>Rarb</i>     |               |          | Rarb    |                              | Rarb    |
| <i>Rarres2</i>  |               | Rarres2  |         |                              |         |
| <i>Rars</i>     |               |          | Rars    |                              |         |
| <i>Rasa1</i>    | Rasa1         |          |         |                              |         |
| <i>Rasa2</i>    |               | Rasa2    |         | Rasa2                        |         |
| <i>Rasa3</i>    |               | Rasa3    | Rasa3   |                              |         |
| <i>Rasal1</i>   | Rasal1        |          | Rasal1  |                              |         |
| <i>Rasal2</i>   |               |          | Rasal2  |                              | Rasal2  |
| <i>Rasal3</i>   | Rasal3        |          | Rasal3  |                              |         |
| <i>Rasgef1a</i> |               | Rasgef1a |         |                              |         |
| <i>Rasgrf2</i>  | Rasgrf2       |          |         |                              |         |
| <i>Rasgrp1</i>  |               |          | Rasgrp1 |                              | Rasgrp1 |
| <i>Rasgrp2</i>  |               |          | Rasgrp2 |                              |         |
| <i>Rasgrp4</i>  |               | Rasgrp4  |         |                              |         |
| <i>Rasip1</i>   | Rasip1        | Rasip1   | Rasip1  |                              |         |
| <i>Rasl11a</i>  | Rasl11a       |          |         |                              |         |
| <i>Rasl11b</i>  |               | Rasl11b  |         |                              |         |
| <i>Rasl2-9</i>  |               |          | Rasl2-9 |                              |         |
| <i>Rassf10</i>  |               |          | Rassf10 |                              |         |
| <i>Rassf5</i>   | Rassf5        |          | Rassf5  |                              |         |
| <i>Rassf6</i>   | Rassf6        |          | Rassf6  |                              |         |
| <i>Rb1</i>      |               | Rb1      | Rb1     |                              |         |
| <i>Rbakdn</i>   |               |          | Rbakdn  |                              |         |
| <i>Rbbp5</i>    |               |          | Rbbp5   |                              | Rbbp5   |
| <i>Rbbp6</i>    |               | Rbbp6    |         |                              |         |
| <i>Rbbp8</i>    |               | Rbbp8    | Rbbp8   |                              |         |
| <i>Rbbp8nl</i>  | Rbbp8nl       |          |         |                              |         |
| <i>Rbbp9</i>    |               |          | Rbbp9   |                              | Rbbp9   |
| <i>Rbck1</i>    |               | Rbck1    | Rbck1   |                              |         |
| <i>Rbfox1</i>   |               | Rbfox1   |         |                              |         |
| <i>Rbfox2</i>   |               |          | Rbfox2  |                              | Rbfox2  |
| <i>Rbks</i>     |               | Rbks     |         |                              |         |
| <i>Rbl1</i>     |               |          | Rbl1    |                              |         |
| <i>Rbm11</i>    | Rbm11         |          |         |                              |         |
| <i>Rbm12</i>    |               |          | Rbm12   |                              |         |
| <i>Rbm14</i>    | Rbm14         | Rbm14    | Rbm14   |                              |         |

Suppl. Table 1  
(172/234)

|               | CHIP-Seq hits |               |               | Unique hits with interactors |              |
|---------------|---------------|---------------|---------------|------------------------------|--------------|
|               | unstimulated  | Ac            | LPS           | Ac                           | LPS          |
| <i>Rbm15</i>  |               |               | <i>Rbm15</i>  |                              |              |
| <i>Rbm18</i>  |               |               | <i>Rbm18</i>  |                              |              |
| <i>Rbm19</i>  |               |               | <i>Rbm19</i>  |                              |              |
| <i>Rbm22</i>  |               |               | <i>Rbm22</i>  |                              |              |
| <i>Rbm24</i>  |               | <i>Rbm24</i>  |               |                              |              |
| <i>Rbm25</i>  |               |               | <i>Rbm25</i>  |                              |              |
| <i>Rbm26</i>  |               |               | <i>Rbm26</i>  |                              |              |
| <i>Rbm31y</i> |               | <i>Rbm31y</i> | <i>Rbm31y</i> |                              |              |
| <i>Rbm38</i>  |               |               | <i>Rbm38</i>  |                              |              |
| <i>Rbm42</i>  |               |               | <i>Rbm42</i>  |                              |              |
| <i>Rbm43</i>  |               | <i>Rbm43</i>  |               |                              |              |
| <i>Rbm45</i>  |               |               | <i>Rbm45</i>  |                              |              |
| <i>Rbm48</i>  |               | <i>Rbm48</i>  |               |                              |              |
| <i>Rbm6</i>   | <i>Rbm6</i>   |               | <i>Rbm6</i>   |                              |              |
| <i>Rbm7</i>   |               |               | <i>Rbm7</i>   |                              |              |
| <i>Rbm8a</i>  |               | <i>Rbm8a</i>  | <i>Rbm8a</i>  |                              |              |
| <i>Rbms1</i>  | <i>Rbms1</i>  |               | <i>Rbms1</i>  |                              |              |
| <i>Rbms2</i>  |               | <i>Rbms2</i>  |               | <i>Rbms2</i>                 |              |
| <i>Rbmx2</i>  |               |               | <i>Rbmx2</i>  |                              |              |
| <i>Rbmxl1</i> |               |               | <i>Rbmxl1</i> |                              |              |
| <i>Rbmy</i>   | <i>Rbmy</i>   |               |               |                              |              |
| <i>Rbp1</i>   |               | <i>Rbp1</i>   |               |                              |              |
| <i>Rbp3</i>   | <i>Rbp3</i>   | <i>Rbp3</i>   | <i>Rbp3</i>   |                              |              |
| <i>Rbp4</i>   | <i>Rbp4</i>   | <i>Rbp4</i>   | <i>Rbp4</i>   |                              |              |
| <i>Rbp7</i>   |               | <i>Rbp7</i>   | <i>Rbp7</i>   |                              |              |
| <i>Rbpj</i>   |               | <i>Rbpj</i>   | <i>Rbpj</i>   |                              |              |
| <i>Rc3h1</i>  |               |               | <i>Rc3h1</i>  |                              |              |
| <i>Rcan1</i>  |               |               | <i>Rcan1</i>  |                              |              |
| <i>Rcan3</i>  |               | <i>Rcan3</i>  |               |                              |              |
| <i>Rcbtb1</i> | <i>Rcbtb1</i> | <i>Rcbtb1</i> |               |                              |              |
| <i>Rcbtb2</i> | <i>Rcbtb2</i> | <i>Rcbtb2</i> |               |                              |              |
| <i>Rcc1</i>   | <i>Rcc1</i>   | <i>Rcc1</i>   |               |                              |              |
| <i>Rcc2</i>   |               |               | <i>Rcc2</i>   |                              |              |
| <i>Rccd1</i>  |               |               | <i>Rccd1</i>  |                              |              |
| <i>Rchy1</i>  |               |               | <i>Rchy1</i>  |                              | <i>Rchy1</i> |
| <i>Rcn2</i>   |               | <i>Rcn2</i>   |               |                              |              |
| <i>Rcn3</i>   |               |               | <i>Rcn3</i>   |                              |              |
| <i>Rcor1</i>  |               | <i>Rcor1</i>  | <i>Rcor1</i>  |                              |              |
| <i>Rcor3</i>  | <i>Rcor3</i>  |               |               |                              |              |
| <i>Rcvrn</i>  | <i>Rcvrn</i>  | <i>Rcvrn</i>  |               |                              |              |
| <i>Rd3</i>    |               |               | <i>Rd3</i>    |                              |              |
| <i>Rdh1</i>   |               |               | <i>Rdh1</i>   |                              | <i>Rdh1</i>  |
| <i>Rdh10</i>  | <i>Rdh10</i>  | <i>Rdh10</i>  | <i>Rdh10</i>  |                              |              |
| <i>Rdh7</i>   |               |               | <i>Rdh7</i>   |                              |              |
| <i>Rdm1</i>   |               | <i>Rdm1</i>   |               |                              |              |
| <i>Rec114</i> |               |               | <i>Rec114</i> |                              |              |
| <i>Rec8</i>   |               |               | <i>Rec8</i>   |                              |              |
| <i>Reck</i>   | <i>Reck</i>   |               |               |                              |              |
| <i>Redrum</i> |               | <i>Redrum</i> | <i>Redrum</i> |                              |              |

Suppl. Table 1  
(173/234)

|               | CHIP-Seq hits |        |        | Unique hits with interactors |      |
|---------------|---------------|--------|--------|------------------------------|------|
|               | unstimulated  | Ac     | LPS    | Ac                           | LPS  |
| <i>Reep2</i>  |               | Reep2  |        | Reep2                        |      |
| <i>Reg2</i>   |               |        | Reg2   |                              |      |
| <i>Reg4</i>   |               | Reg4   |        |                              |      |
| <i>Rel</i>    |               | Rel    |        | Rel                          |      |
| <i>Rela</i>   |               |        | Rela   |                              | Rela |
| <i>Rell1</i>  | Rell1         |        | Rell1  |                              |      |
| <i>Rell2</i>  |               |        | Rell2  |                              |      |
| <i>Reln</i>   |               | Reln   |        |                              |      |
| <i>Relt</i>   |               | Relt   | Relt   |                              |      |
| <i>Renbp</i>  |               | Renbp  |        |                              |      |
| <i>Rep15</i>  |               | Rep15  |        |                              |      |
| <i>Repin1</i> |               | Repin1 | Repin1 |                              |      |
| <i>Reps1</i>  |               |        | Reps1  |                              |      |
| <i>Reps2</i>  |               | Reps2  | Reps2  |                              |      |
| <i>Rerg</i>   |               | Rerg   |        |                              |      |
| <i>Rest</i>   |               |        | Rest   |                              | Rest |
| <i>Ret</i>    |               | Ret    |        |                              |      |
| <i>Retn</i>   |               | Retn   |        |                              |      |
| <i>Retnlb</i> |               | Retnlb | Retnlb |                              |      |
| <i>Retnlg</i> |               |        | Retnlg |                              |      |
| <i>Retsat</i> |               |        | Retsat |                              |      |
| <i>Rev1</i>   | Rev1          | Rev1   | Rev1   |                              |      |
| <i>Rexo1</i>  |               | Rexo1  | Rexo1  |                              |      |
| <i>Rexo2</i>  |               | Rexo2  |        |                              |      |
| <i>Rexo4</i>  |               | Rexo4  |        |                              |      |
| <i>Rfc1</i>   |               | Rfc1   | Rfc1   |                              |      |
| <i>Rfc2</i>   |               |        | Rfc2   |                              |      |
| <i>Rfc3</i>   |               | Rfc3   |        |                              |      |
| <i>Rfc4</i>   | Rfc4          |        |        |                              |      |
| <i>Rfesd</i>  | Rfesd         | Rfesd  |        |                              |      |
| <i>Rfk</i>    | Rfk           | Rfk    | Rfk    |                              |      |
| <i>Rfpl4b</i> |               | Rfpl4b |        |                              |      |
| <i>Rft1</i>   |               |        | Rft1   |                              | Rft1 |
| <i>Rftn1</i>  | Rftn1         | Rftn1  |        |                              |      |
| <i>Rftn2</i>  |               | Rftn2  | Rftn2  |                              |      |
| <i>Rfwd2</i>  |               |        | Rfwd2  |                              |      |
| <i>Rfwd3</i>  |               |        | Rfwd3  |                              |      |
| <i>Rfx1</i>   |               |        | Rfx1   |                              |      |
| <i>Rfx2</i>   |               | Rfx2   |        | Rfx2                         |      |
| <i>Rfx3</i>   | Rfx3          |        | Rfx3   |                              |      |
| <i>Rfx5</i>   | Rfx5          | Rfx5   | Rfx5   |                              |      |
| <i>Rfx6</i>   |               | Rfx6   | Rfx6   |                              |      |
| <i>Rfx8</i>   | Rfx8          |        |        |                              |      |
| <i>Rgag1</i>  |               | Rgag1  |        |                              |      |
| <i>Rgcc</i>   |               |        | Rgcc   |                              | Rgcc |
| <i>Rgl2</i>   |               | Rgl2   |        |                              |      |
| <i>Rgmb</i>   |               | Rgmb   |        |                              |      |
| <i>Rgn</i>    | Rgn           |        |        |                              |      |
| <i>Rgr</i>    | Rgr           |        | Rgr    |                              |      |

Suppl. Table 1  
(174/234)

|                | CHIP-Seq hits |         |         | Unique hits with interactors |      |
|----------------|---------------|---------|---------|------------------------------|------|
|                | unstimulated  | Ac      | LPS     | Ac                           | LPS  |
| <i>Rgs1</i>    | Rgs1          |         |         |                              |      |
| <i>Rgs10</i>   |               | Rgs10   | Rgs10   |                              |      |
| <i>Rgs11</i>   |               | Rgs11   |         |                              |      |
| <i>Rgs12</i>   |               | Rgs12   | Rgs12   |                              |      |
| <i>Rgs16</i>   | Rgs16         |         |         |                              |      |
| <i>Rgs19</i>   |               | Rgs19   |         |                              |      |
| <i>Rgs2</i>    |               | Rgs2    | Rgs2    |                              |      |
| <i>Rgs20</i>   |               | Rgs20   | Rgs20   |                              |      |
| <i>Rgs21</i>   | Rgs21         |         | Rgs21   |                              |      |
| <i>Rgs5</i>    |               | Rgs5    |         |                              |      |
| <i>Rgs7</i>    |               |         | Rgs7    |                              |      |
| <i>Rgs9</i>    |               |         | Rgs9    |                              |      |
| <i>Rgs9bp</i>  |               | Rgs9bp  |         | Rgs9bp                       |      |
| <i>Rhag</i>    | Rhag          | Rhag    | Rhag    |                              |      |
| <i>Rhbdd1</i>  |               | Rhbdd1  |         |                              |      |
| <i>Rhbdf2</i>  | Rhbdf2        |         | Rhbdf2  |                              |      |
| <i>Rhbdl3</i>  |               | Rhbdl3  |         | Rhbdl3                       |      |
| <i>Rhbg</i>    | Rhbg          |         |         |                              |      |
| <i>Rhd</i>     |               | Rhd     |         |                              |      |
| <i>Rheb</i>    |               | Rheb    |         | Rheb                         |      |
| <i>Rho</i>     |               | Rho     |         | Rho                          |      |
| <i>Rhoa</i>    | Rhoa          | Rhoa    | Rhoa    |                              |      |
| <i>Rhobtb1</i> |               | Rhobtb1 |         |                              |      |
| <i>Rhobtb2</i> |               |         | Rhobtb2 |                              |      |
| <i>Rhoc</i>    | Rhoc          |         |         |                              |      |
| <i>Rhod</i>    |               |         | Rhod    |                              |      |
| <i>Rhog</i>    |               | Rhog    |         |                              |      |
| <i>Rhoh</i>    |               | Rhoh    |         | Rhoh                         |      |
| <i>Rhoj</i>    | Rhoj          | Rhoj    |         |                              |      |
| <i>Rhoq</i>    |               |         | Rhoq    |                              | Rhoq |
| <i>Rhot1</i>   |               | Rhot1   | Rhot1   |                              |      |
| <i>Rhot2</i>   |               | Rhot2   |         |                              |      |
| <i>Rhou</i>    |               | Rhou    | Rhou    |                              |      |
| <i>Rhox1</i>   | Rhox1         | Rhox1   |         |                              |      |
| <i>Rhox12</i>  | Rhox12        |         |         |                              |      |
| <i>Rhox13</i>  |               |         | Rhox13  |                              |      |
| <i>Rhox2b</i>  |               | Rhox2b  |         |                              |      |
| <i>Rhox2g</i>  | Rhox2g        |         |         |                              |      |
| <i>Rhox2h</i>  |               | Rhox2h  |         |                              |      |
| <i>Rhox3a</i>  |               |         | Rhox3a  |                              |      |
| <i>Rhox3e</i>  |               |         | Rhox3e  |                              |      |
| <i>Rhox4f</i>  | Rhox4f        |         |         |                              |      |
| <i>Rhpn1</i>   |               | Rhpn1   |         |                              |      |
| <i>Rian</i>    |               | Rian    |         |                              |      |
| <i>Ric8</i>    |               | Ric8    |         |                              |      |
| <i>Rictor</i>  | Rictor        | Rictor  |         |                              |      |
| <i>Rif1</i>    | Rif1          |         | Rif1    |                              |      |
| <i>Riiad1</i>  |               |         | Riiad1  |                              |      |
| <i>Rilpl1</i>  |               |         | Rilpl1  |                              |      |

Suppl. Table 1  
(175/234)

|                 | CHIP-Seq hits |          |          | Unique hits with interactors |        |
|-----------------|---------------|----------|----------|------------------------------|--------|
|                 | unstimulated  | Ac       | LPS      | Ac                           | LPS    |
| <i>Rilpl2</i>   |               |          | Rilpl2   |                              |        |
| <i>Rimkla</i>   |               | Rimkla   |          |                              |        |
| <i>Rimklb</i>   |               |          | Rimklb   |                              |        |
| <i>Rims1</i>    | Rims1         |          |          |                              |        |
| <i>Rims2</i>    | Rims2         |          |          |                              |        |
| <i>Rims4</i>    | Rims4         | Rims4    |          |                              |        |
| <i>Rin1</i>     |               |          | Rin1     |                              | Rin1   |
| <i>Rin2</i>     |               |          | Rin2     |                              | Rin2   |
| <i>Rin3</i>     |               | Rin3     |          |                              |        |
| <i>Rint1</i>    |               | Rint1    |          |                              |        |
| <i>Riok1</i>    | Riok1         | Riok1    |          |                              |        |
| <i>Riok3</i>    |               | Riok3    |          | Riok3                        |        |
| <i>Ripply2</i>  | Ripply2       | Ripply2  | Ripply2  |                              |        |
| <i>Rit1</i>     | Rit1          |          |          |                              |        |
| <i>Rlf</i>      |               | Rlf      |          |                              |        |
| <i>Rlim</i>     |               |          | Rlim     |                              |        |
| <i>Rmdn1</i>    | Rmdn1         | Rmdn1    |          |                              |        |
| <i>Rmdn2</i>    | Rmdn2         |          |          |                              |        |
| <i>Rmi1</i>     |               |          | Rmi1     |                              |        |
| <i>Rmi2</i>     |               | Rmi2     | Rmi2     |                              |        |
| <i>Rmnd1</i>    | Rmnd1         |          | Rmnd1    |                              |        |
| <i>Rmnd5a</i>   |               | Rmnd5a   | Rmnd5a   |                              |        |
| <i>Rmnd5b</i>   |               | Rmnd5b   |          |                              |        |
| <i>Rn4.5s</i>   | Rn4.5s        | Rn4.5s   | Rn4.5s   |                              |        |
| <i>Rn45s</i>    |               | Rn45s    | Rn45s    |                              |        |
| <i>Rnase10</i>  | Rnase10       | Rnase10  | Rnase10  |                              |        |
| <i>Rnase11</i>  | Rnase11       |          |          |                              |        |
| <i>Rnase12</i>  | Rnase12       |          |          |                              |        |
| <i>Rnase6</i>   |               | Rnase6   |          |                              |        |
| <i>Rnaseh1</i>  |               |          | Rnaseh1  |                              |        |
| <i>Rnaseh2b</i> |               |          | Rnaseh2b |                              |        |
| <i>Rnaseh2c</i> | Rnaseh2c      | Rnaseh2c |          |                              |        |
| <i>Rnasel</i>   |               | Rnasel   |          | Rnasel                       |        |
| <i>Rnaset2a</i> |               |          | Rnaset2a |                              |        |
| <i>Rnaset2b</i> |               |          | Rnaset2b |                              |        |
| <i>Rnd3</i>     | Rnd3          |          | Rnd3     |                              |        |
| <i>Rnf10</i>    | Rnf10         | Rnf10    | Rnf10    |                              |        |
| <i>Rnf103</i>   | Rnf103        | Rnf103   | Rnf103   |                              |        |
| <i>Rnf111</i>   | Rnf111        |          |          |                              |        |
| <i>Rnf114</i>   |               | Rnf114   | Rnf114   |                              |        |
| <i>Rnf115</i>   |               |          | Rnf115   |                              |        |
| <i>Rnf128</i>   |               | Rnf128   | Rnf128   |                              |        |
| <i>Rnf130</i>   |               | Rnf130   |          |                              |        |
| <i>Rnf135</i>   |               |          | Rnf135   |                              |        |
| <i>Rnf138</i>   |               |          | Rnf138   |                              |        |
| <i>Rnf139</i>   |               |          | Rnf139   |                              | Rnf139 |
| <i>Rnf14</i>    |               |          | Rnf14    |                              |        |
| <i>Rnf144a</i>  |               | Rnf144a  |          |                              |        |
| <i>Rnf146</i>   |               |          | Rnf146   |                              |        |

Suppl. Table 1  
(176/234)

|               | ChIP-Seq hits |               |               | Unique hits with interactors |               |
|---------------|---------------|---------------|---------------|------------------------------|---------------|
|               | unstimulated  | Ac            | LPS           | Ac                           | LPS           |
| <i>Rnf157</i> |               |               | <i>Rnf157</i> |                              |               |
| <i>Rnf165</i> |               |               | <i>Rnf165</i> |                              | <i>Rnf165</i> |
| <i>Rnf167</i> | <i>Rnf167</i> |               | <i>Rnf167</i> |                              |               |
| <i>Rnf169</i> |               | <i>Rnf169</i> |               |                              |               |
| <i>Rnf17</i>  |               |               | <i>Rnf17</i>  |                              |               |
| <i>Rnf170</i> |               |               | <i>Rnf170</i> |                              |               |
| <i>Rnf181</i> | <i>Rnf181</i> |               | <i>Rnf181</i> |                              |               |
| <i>Rnf182</i> |               | <i>Rnf182</i> | <i>Rnf182</i> |                              |               |
| <i>Rnf183</i> | <i>Rnf183</i> |               |               |                              |               |
| <i>Rnf185</i> |               | <i>Rnf185</i> | <i>Rnf185</i> |                              |               |
| <i>Rnf19a</i> |               |               | <i>Rnf19a</i> |                              |               |
| <i>Rnf207</i> |               |               | <i>Rnf207</i> |                              |               |
| <i>Rnf214</i> |               |               | <i>Rnf214</i> |                              |               |
| <i>Rnf217</i> |               | <i>Rnf217</i> |               |                              |               |
| <i>Rnf219</i> | <i>Rnf219</i> |               |               |                              |               |
| <i>Rnf26</i>  | <i>Rnf26</i>  |               | <i>Rnf26</i>  |                              |               |
| <i>Rnf31</i>  |               | <i>Rnf31</i>  |               |                              |               |
| <i>Rnf38</i>  | <i>Rnf38</i>  | <i>Rnf38</i>  | <i>Rnf38</i>  |                              |               |
| <i>Rnf4</i>   |               |               | <i>Rnf4</i>   |                              | <i>Rnf4</i>   |
| <i>Rnf41</i>  |               | <i>Rnf41</i>  | <i>Rnf41</i>  |                              |               |
| <i>Rnf5</i>   |               |               | <i>Rnf5</i>   |                              |               |
| <i>Rnf7</i>   |               | <i>Rnf7</i>   |               |                              |               |
| <i>Rnft1</i>  |               | <i>Rnft1</i>  |               |                              |               |
| <i>Rnft2</i>  | <i>Rnft2</i>  |               |               |                              |               |
| <i>Rngtt</i>  |               |               | <i>Rngtt</i>  |                              |               |
| <i>Rnmtl1</i> | <i>Rnmtl1</i> |               |               |                              |               |
| <i>Rnpc3</i>  |               | <i>Rnpc3</i>  |               |                              |               |
| <i>Rnpep</i>  |               |               | <i>Rnpep</i>  |                              |               |
| <i>Rnps1</i>  | <i>Rnps1</i>  |               |               |                              |               |
| <i>Rnu12</i>  |               | <i>Rnu12</i>  |               |                              |               |
| <i>Rnu7</i>   |               |               | <i>Rnu7</i>   |                              |               |
| <i>Robo1</i>  |               | <i>Robo1</i>  |               |                              |               |
| <i>Robo2</i>  |               | <i>Robo2</i>  | <i>Robo2</i>  |                              |               |
| <i>Rogdi</i>  | <i>Rogdi</i>  |               |               |                              |               |
| <i>Ropn1</i>  |               | <i>Ropn1</i>  |               |                              |               |
| <i>Ropn1l</i> |               | <i>Ropn1l</i> | <i>Ropn1l</i> |                              |               |
| <i>Rora</i>   | <i>Rora</i>   | <i>Rora</i>   | <i>Rora</i>   |                              |               |
| <i>Rorb</i>   | <i>Rorb</i>   | <i>Rorb</i>   |               |                              |               |
| <i>Rorc</i>   |               |               | <i>Rorc</i>   |                              | <i>Rorc</i>   |
| <i>Ros1</i>   |               | <i>Ros1</i>   |               |                              |               |
| <i>Rp1</i>    |               | <i>Rp1</i>    | <i>Rp1</i>    |                              |               |
| <i>Rp1l1</i>  |               | <i>Rp1l1</i>  |               |                              |               |
| <i>Rp2h</i>   |               |               | <i>Rp2h</i>   |                              | <i>Rp2h</i>   |
| <i>Rp9</i>    |               | <i>Rp9</i>    |               |                              |               |
| <i>Rpain</i>  | <i>Rpain</i>  |               |               |                              |               |
| <i>Rpap2</i>  |               |               | <i>Rpap2</i>  |                              |               |
| <i>Rpap3</i>  |               |               | <i>Rpap3</i>  |                              |               |
| <i>Rpe65</i>  |               | <i>Rpe65</i>  |               |                              |               |
| <i>Rpf1</i>   |               | <i>Rpf1</i>   |               |                              |               |



Suppl. Table 1  
(177/234)

|                  | ChIP-Seq hits |           |           | Unique hits with interactors |     |
|------------------|---------------|-----------|-----------|------------------------------|-----|
|                  | unstimulated  | Ac        | LPS       | Ac                           | LPS |
| <i>Rpf2</i>      |               | Rpf2      |           |                              |     |
| <i>Rpgr</i>      |               |           | Rpgr      |                              |     |
| <i>Rpgrip1</i>   |               |           | Rpgrip1   |                              |     |
| <i>Rpgrip1l</i>  | Rpgrip1l      |           |           |                              |     |
| <i>Rpl10l</i>    |               | Rpl10l    |           |                              |     |
| <i>Rpl13</i>     | Rpl13         |           | Rpl13     |                              |     |
| <i>Rpl15</i>     |               |           | Rpl15     |                              |     |
| <i>Rpl17</i>     |               |           | Rpl17     |                              |     |
| <i>Rpl19</i>     |               | Rpl19     |           |                              |     |
| <i>Rpl21</i>     |               | Rpl21     | Rpl21     |                              |     |
| <i>Rpl22</i>     | Rpl22         | Rpl22     | Rpl22     |                              |     |
| <i>Rpl22l1</i>   |               | Rpl22l1   |           |                              |     |
| <i>Rpl23a</i>    | Rpl23a        | Rpl23a    | Rpl23a    |                              |     |
| <i>Rpl24</i>     | Rpl24         |           |           |                              |     |
| <i>Rpl27</i>     |               |           | Rpl27     |                              |     |
| <i>Rpl28</i>     |               | Rpl28     | Rpl28     |                              |     |
| <i>Rpl29</i>     |               | Rpl29     |           |                              |     |
| <i>Rpl3</i>      |               |           | Rpl3      |                              |     |
| <i>Rpl30</i>     | Rpl30         | Rpl30     | Rpl30     |                              |     |
| <i>Rpl34</i>     | Rpl34         | Rpl34     | Rpl34     |                              |     |
| <i>Rpl34-ps1</i> | Rpl34-ps1     | Rpl34-ps1 | Rpl34-ps1 |                              |     |
| <i>Rpl35</i>     |               |           | Rpl35     |                              |     |
| <i>Rpl35a</i>    | Rpl35a        | Rpl35a    | Rpl35a    |                              |     |
| <i>Rpl37</i>     |               | Rpl37     | Rpl37     |                              |     |
| <i>Rpl37a</i>    |               |           | Rpl37a    |                              |     |
| <i>Rpl38</i>     | Rpl38         | Rpl38     | Rpl38     |                              |     |
| <i>Rpl39</i>     |               |           | Rpl39     |                              |     |
| <i>Rpl39l</i>    |               |           | Rpl39l    |                              |     |
| <i>Rpl3l</i>     |               |           | Rpl3l     |                              |     |
| <i>Rpl4</i>      | Rpl4          | Rpl4      | Rpl4      |                              |     |
| <i>Rpl41</i>     |               |           | Rpl41     |                              |     |
| <i>Rpl5</i>      |               | Rpl5      | Rpl5      |                              |     |
| <i>Rpl6</i>      | Rpl6          | Rpl6      | Rpl6      |                              |     |
| <i>Rpl7</i>      |               |           | Rpl7      |                              |     |
| <i>Rpl7a</i>     |               | Rpl7a     |           |                              |     |
| <i>Rpl7l1</i>    | Rpl7l1        | Rpl7l1    | Rpl7l1    |                              |     |
| <i>Rpl9</i>      |               | Rpl9      | Rpl9      |                              |     |
| <i>Rplp0</i>     |               |           | Rplp0     |                              |     |
| <i>Rplp1</i>     |               |           | Rplp1     |                              |     |
| <i>Rplp2</i>     | Rplp2         |           |           |                              |     |
| <i>Rplp2-ps1</i> | Rplp2-ps1     |           |           |                              |     |
| <i>Rpn1</i>      |               |           | Rpn1      |                              |     |
| <i>Rpp14</i>     | Rpp14         |           | Rpp14     |                              |     |
| <i>Rpp25</i>     |               | Rpp25     |           |                              |     |
| <i>Rpp30</i>     |               | Rpp30     |           |                              |     |
| <i>Rpp40</i>     | Rpp40         |           |           |                              |     |
| <i>Rpph1</i>     |               |           | Rpph1     |                              |     |
| <i>Rprd1a</i>    |               | Rprd1a    | Rprd1a    |                              |     |
| <i>Rprd1b</i>    |               | Rprd1b    |           |                              |     |

Suppl. Table 1  
(178/234)

|                   | ChIP-Seq hits     |                   |                | Unique hits with interactors |              |
|-------------------|-------------------|-------------------|----------------|------------------------------|--------------|
|                   | unstimulated      | Ac                | LPS            | Ac                           | LPS          |
| <i>Rprd2</i>      |                   |                   | <i>Rprd2</i>   |                              | <i>Rprd2</i> |
| <i>Rprml</i>      |                   | <i>Rprml</i>      |                |                              |              |
| <i>Rps10</i>      |                   |                   | <i>Rps10</i>   |                              |              |
| <i>Rps12</i>      | <i>Rps12</i>      | <i>Rps12</i>      | <i>Rps12</i>   |                              |              |
| <i>Rps15</i>      |                   | <i>Rps15</i>      |                |                              |              |
| <i>Rps15a</i>     | <i>Rps15a</i>     |                   | <i>Rps15a</i>  |                              |              |
| <i>Rps15a-ps4</i> | <i>Rps15a-ps4</i> |                   |                |                              |              |
| <i>Rps15a-ps6</i> | <i>Rps15a-ps6</i> | <i>Rps15a-ps6</i> |                |                              |              |
| <i>Rps17</i>      | <i>Rps17</i>      | <i>Rps17</i>      |                |                              |              |
| <i>Rps18</i>      |                   |                   | <i>Rps18</i>   |                              |              |
| <i>Rps20</i>      | <i>Rps20</i>      | <i>Rps20</i>      | <i>Rps20</i>   |                              |              |
| <i>Rps21</i>      |                   | <i>Rps21</i>      | <i>Rps21</i>   |                              |              |
| <i>Rps24</i>      |                   | <i>Rps24</i>      |                |                              |              |
| <i>Rps25</i>      | <i>Rps25</i>      |                   | <i>Rps25</i>   |                              |              |
| <i>Rps26</i>      | <i>Rps26</i>      | <i>Rps26</i>      | <i>Rps26</i>   |                              |              |
| <i>Rps27</i>      | <i>Rps27</i>      | <i>Rps27</i>      | <i>Rps27</i>   |                              |              |
| <i>Rps27a</i>     |                   |                   | <i>Rps27a</i>  |                              |              |
| <i>Rps27rt</i>    | <i>Rps27rt</i>    | <i>Rps27rt</i>    | <i>Rps27rt</i> |                              |              |
| <i>Rps28</i>      |                   |                   | <i>Rps28</i>   |                              |              |
| <i>Rps29</i>      | <i>Rps29</i>      | <i>Rps29</i>      | <i>Rps29</i>   |                              |              |
| <i>Rps3</i>       | <i>Rps3</i>       |                   |                |                              |              |
| <i>Rps3a1</i>     | <i>Rps3a1</i>     |                   |                |                              |              |
| <i>Rps5</i>       | <i>Rps5</i>       | <i>Rps5</i>       | <i>Rps5</i>    |                              |              |
| <i>Rps6ka2</i>    |                   | <i>Rps6ka2</i>    |                |                              |              |
| <i>Rps6ka4</i>    |                   | <i>Rps6ka4</i>    |                |                              |              |
| <i>Rps6ka5</i>    |                   | <i>Rps6ka5</i>    |                |                              |              |
| <i>Rps6kb1</i>    |                   | <i>Rps6kb1</i>    |                | <i>Rps6kb1</i>               |              |
| <i>Rps6kc1</i>    |                   | <i>Rps6kc1</i>    |                |                              |              |
| <i>Rps6kl1</i>    |                   | <i>Rps6kl1</i>    |                |                              |              |
| <i>Rps7</i>       | <i>Rps7</i>       | <i>Rps7</i>       | <i>Rps7</i>    |                              |              |
| <i>Rps8</i>       | <i>Rps8</i>       |                   | <i>Rps8</i>    |                              |              |
| <i>Rptn</i>       |                   | <i>Rptn</i>       |                |                              |              |
| <i>Rptor</i>      | <i>Rptor</i>      | <i>Rptor</i>      | <i>Rptor</i>   |                              |              |
| <i>Rpusd3</i>     | <i>Rpusd3</i>     |                   |                |                              |              |
| <i>Rqcd1</i>      |                   | <i>Rqcd1</i>      |                |                              |              |
| <i>Rragd</i>      |                   |                   | <i>Rragd</i>   |                              | <i>Rragd</i> |
| <i>Rras</i>       |                   |                   | <i>Rras</i>    |                              |              |
| <i>Rras2</i>      | <i>Rras2</i>      |                   |                |                              |              |
| <i>Rrm1</i>       |                   |                   | <i>Rrm1</i>    |                              |              |
| <i>Rrn3</i>       |                   |                   | <i>Rrn3</i>    |                              |              |
| <i>Rrnad1</i>     |                   | <i>Rrnad1</i>     |                | <i>Rrnad1</i>                |              |
| <i>Rrp1</i>       | <i>Rrp1</i>       | <i>Rrp1</i>       | <i>Rrp1</i>    |                              |              |
| <i>Rrp12</i>      | <i>Rrp12</i>      | <i>Rrp12</i>      | <i>Rrp12</i>   |                              |              |
| <i>Rrp1b</i>      | <i>Rrp1b</i>      |                   | <i>Rrp1b</i>   |                              |              |
| <i>Rrp36</i>      |                   | <i>Rrp36</i>      |                |                              |              |
| <i>Rrp7a</i>      |                   |                   | <i>Rrp7a</i>   |                              |              |
| <i>Rrp8</i>       | <i>Rrp8</i>       | <i>Rrp8</i>       | <i>Rrp8</i>    |                              |              |
| <i>Rrp9</i>       |                   |                   | <i>Rrp9</i>    |                              |              |
| <i>Rsad2</i>      |                   | <i>Rsad2</i>      |                |                              |              |

Suppl. Table 1  
(179/234)

|                | ChIP-Seq hits |         |         | Unique hits with interactors |       |
|----------------|---------------|---------|---------|------------------------------|-------|
|                | unstimulated  | Ac      | LPS     | Ac                           | LPS   |
| <i>Rsc1a1</i>  |               |         | Rsc1a1  |                              |       |
| <i>Rsl1d1</i>  |               | Rsl1d1  |         |                              |       |
| <i>Rsph14</i>  |               |         | Rsph14  |                              |       |
| <i>Rsph3b</i>  |               |         | Rsph3b  |                              |       |
| <i>Rsph4a</i>  |               |         | Rsph4a  |                              |       |
| <i>Rsph9</i>   |               |         | Rsph9   |                              |       |
| <i>Rspo2</i>   |               |         | Rspo2   |                              |       |
| <i>Rspo3</i>   |               |         | Rspo3   |                              |       |
| <i>Rsrc2</i>   |               | Rsrc2   | Rsrc2   |                              |       |
| <i>Rsrp1</i>   | Rsrp1         |         |         |                              |       |
| <i>Rtbdn</i>   | Rtbdn         |         |         |                              |       |
| <i>Rtca</i>    | Rtca          |         |         |                              |       |
| <i>Rtfdc1</i>  |               | Rtfdc1  |         |                              |       |
| <i>Rtkn</i>    |               |         | Rtkn    |                              |       |
| <i>Rtkn2</i>   |               |         | Rtkn2   |                              | Rtkn2 |
| <i>Rtn3</i>    |               |         | Rtn3    |                              |       |
| <i>Rtn4rl1</i> |               |         | Rtn4rl1 |                              |       |
| <i>Rtn4rl2</i> |               |         | Rtn4rl2 |                              |       |
| <i>Rtp1</i>    |               |         | Rtp1    |                              |       |
| <i>Rtp3</i>    |               | Rtp3    | Rtp3    |                              |       |
| <i>Rttn</i>    |               | Rttn    |         |                              |       |
| <i>Rubie</i>   |               |         | Rubie   |                              |       |
| <i>Rufy2</i>   |               |         | Rufy2   |                              |       |
| <i>Rufy3</i>   |               |         | Rufy3   |                              |       |
| <i>Rundc3a</i> | Rundc3a       | Rundc3a | Rundc3a |                              |       |
| <i>Runx1t1</i> |               | Runx1t1 | Runx1t1 |                              |       |
| <i>Runx2</i>   |               | Runx2   |         | Runx2                        |       |
| <i>Runx3</i>   | Runx3         | Runx3   | Runx3   |                              |       |
| <i>Rusc1</i>   |               | Rusc1   | Rusc1   |                              |       |
| <i>Rusc2</i>   |               | Rusc2   |         |                              |       |
| <i>Ruvbl1</i>  |               |         | Ruvbl1  |                              |       |
| <i>Rwdd1</i>   |               | Rwdd1   |         |                              |       |
| <i>Rwdd3</i>   | Rwdd3         |         |         |                              |       |
| <i>Rxrb</i>    |               | Rxrb    |         | Rxrb                         |       |
| <i>Rxrg</i>    |               | Rxrg    |         | Rxrg                         |       |
| <i>Rybp</i>    |               |         | Rybp    |                              |       |
| <i>Ryk</i>     |               |         | Ryk     |                              |       |
| <i>Ryr1</i>    | Ryr1          |         |         |                              |       |
| <i>Ryr3</i>    |               |         | Ryr3    |                              |       |
| <i>S100a1</i>  |               |         | S100a1  |                              |       |
| <i>S100a10</i> | S100a10       |         |         |                              |       |
| <i>S100a11</i> |               | S100a11 |         |                              |       |
| <i>S100a13</i> | S100a13       | S100a13 | S100a13 |                              |       |
| <i>S100a3</i>  | S100a3        | S100a3  | S100a3  |                              |       |
| <i>S100a4</i>  | S100a4        |         | S100a4  |                              |       |
| <i>S100a5</i>  |               | S100a5  |         |                              |       |
| <i>S100a7a</i> |               | S100a7a | S100a7a |                              |       |
| <i>S100g</i>   |               | S100g   |         |                              |       |
| <i>S100z</i>   |               | S100z   | S100z   |                              |       |

Suppl. Table 1  
(180/234)

|               | ChIP-Seq hits |               |               | Unique hits with interactors |               |
|---------------|---------------|---------------|---------------|------------------------------|---------------|
|               | unstimulated  | Ac            | LPS           | Ac                           | LPS           |
| <i>S1pr1</i>  |               | <i>S1pr1</i>  |               |                              |               |
| <i>S1pr3</i>  | <i>S1pr3</i>  | <i>S1pr3</i>  |               |                              |               |
| <i>S1pr5</i>  |               |               | <i>S1pr5</i>  |                              | <i>S1pr5</i>  |
| <i>Saa1</i>   |               | <i>Saa1</i>   |               |                              |               |
| <i>Saa4</i>   | <i>Saa4</i>   |               |               |                              |               |
| <i>Saal1</i>  | <i>Saal1</i>  |               |               |                              |               |
| <i>Sac3d1</i> |               |               | <i>Sac3d1</i> |                              |               |
| <i>Sacm1l</i> |               |               | <i>Sacm1l</i> |                              |               |
| <i>Sacs</i>   | <i>Sacs</i>   | <i>Sacs</i>   |               |                              |               |
| <i>Safb2</i>  |               | <i>Safb2</i>  |               |                              |               |
| <i>Sag</i>    |               | <i>Sag</i>    | <i>Sag</i>    |                              |               |
| <i>Sall2</i>  | <i>Sall2</i>  | <i>Sall2</i>  | <i>Sall2</i>  |                              |               |
| <i>Sall3</i>  |               | <i>Sall3</i>  |               |                              |               |
| <i>Sall4</i>  |               | <i>Sall4</i>  |               |                              |               |
| <i>Samd1</i>  |               | <i>Samd1</i>  | <i>Samd1</i>  |                              |               |
| <i>Samd11</i> |               | <i>Samd11</i> | <i>Samd11</i> |                              |               |
| <i>Samd15</i> |               | <i>Samd15</i> | <i>Samd15</i> |                              |               |
| <i>Samd4</i>  |               | <i>Samd4</i>  |               | <i>Samd4</i>                 |               |
| <i>Samd7</i>  | <i>Samd7</i>  | <i>Samd7</i>  |               |                              |               |
| <i>Samd8</i>  | <i>Samd8</i>  |               | <i>Samd8</i>  |                              |               |
| <i>Samd9l</i> |               | <i>Samd9l</i> |               |                              |               |
| <i>Samhd1</i> |               |               | <i>Samhd1</i> |                              | <i>Samhd1</i> |
| <i>Samsn1</i> |               | <i>Samsn1</i> | <i>Samsn1</i> |                              |               |
| <i>Sap18</i>  |               | <i>Sap18</i>  |               | <i>Sap18</i>                 |               |
| <i>Sap25</i>  |               | <i>Sap25</i>  |               |                              |               |
| <i>Sap30</i>  |               | <i>Sap30</i>  | <i>Sap30</i>  |                              |               |
| <i>Sar1a</i>  | <i>Sar1a</i>  |               |               |                              |               |
| <i>Sarm1</i>  | <i>Sarm1</i>  |               | <i>Sarm1</i>  |                              |               |
| <i>Sart3</i>  |               |               | <i>Sart3</i>  |                              |               |
| <i>Sass6</i>  |               |               | <i>Sass6</i>  |                              | <i>Sass6</i>  |
| <i>Sat1</i>   |               | <i>Sat1</i>   | <i>Sat1</i>   |                              |               |
| <i>Sat2</i>   |               |               | <i>Sat2</i>   |                              |               |
| <i>Satb1</i>  |               |               | <i>Satb1</i>  |                              | <i>Satb1</i>  |
| <i>Satb2</i>  | <i>Satb2</i>  | <i>Satb2</i>  | <i>Satb2</i>  |                              |               |
| <i>Saysd1</i> |               | <i>Saysd1</i> |               | <i>Saysd1</i>                |               |
| <i>Sbds</i>   |               | <i>Sbds</i>   |               |                              |               |
| <i>Sbno1</i>  |               |               | <i>Sbno1</i>  |                              |               |
| <i>Sbp</i>    |               | <i>Sbp</i>    |               |                              |               |
| <i>Sbpl</i>   |               | <i>Sbpl</i>   |               |                              |               |
| <i>Sbspon</i> | <i>Sbspon</i> |               |               |                              |               |
| <i>Scaf1</i>  |               |               | <i>Scaf1</i>  |                              |               |
| <i>Scaf11</i> |               |               | <i>Scaf11</i> |                              |               |
| <i>Scai</i>   | <i>Scai</i>   |               | <i>Scai</i>   |                              |               |
| <i>Scamp1</i> | <i>Scamp1</i> | <i>Scamp1</i> |               |                              |               |
| <i>Scamp2</i> |               |               | <i>Scamp2</i> |                              | <i>Scamp2</i> |
| <i>Scamp3</i> | <i>Scamp3</i> |               |               |                              |               |
| <i>Scap</i>   |               |               | <i>Scap</i>   |                              |               |
| <i>Scara5</i> |               | <i>Scara5</i> |               |                              |               |
| <i>Scarb1</i> |               |               | <i>Scarb1</i> |                              |               |

Suppl. Table 1  
(181/234)

|                 | CHIP-Seq hits |          |          | Unique hits with interactors |       |
|-----------------|---------------|----------|----------|------------------------------|-------|
|                 | unstimulated  | Ac       | LPS      | Ac                           | LPS   |
| <i>Scarb2</i>   | Scarb2        |          |          |                              |       |
| <i>Scarf2</i>   |               | Scarf2   |          |                              |       |
| <i>Scarna2</i>  |               | Scarna2  | Scarna2  |                              |       |
| <i>Scarna3b</i> |               | Scarna3b | Scarna3b |                              |       |
| <i>Scarna8</i>  |               |          | Scarna8  |                              |       |
| <i>Scarna9</i>  |               |          | Scarna9  |                              |       |
| <i>Scd1</i>     |               | Scd1     |          | Scd1                         |       |
| <i>Scd3</i>     |               | Scd3     |          | Scd3                         |       |
| <i>Scd4</i>     |               |          | Scd4     |                              | Scd4  |
| <i>Scg3</i>     |               | Scg3     |          |                              |       |
| <i>Scgb1a1</i>  | Scgb1a1       |          | Scgb1a1  |                              |       |
| <i>Scgb1b20</i> | Scgb1b20      |          |          |                              |       |
| <i>Scgb1b3</i>  |               |          | Scgb1b3  |                              |       |
| <i>Scgb1b7</i>  |               | Scgb1b7  |          |                              |       |
| <i>Scgb2b12</i> |               | Scgb2b12 |          |                              |       |
| <i>Scgb2b26</i> | Scgb2b26      | Scgb2b26 | Scgb2b26 |                              |       |
| <i>Scgb2b3</i>  |               | Scgb2b3  | Scgb2b3  |                              |       |
| <i>Scgb3a2</i>  |               |          | Scgb3a2  |                              |       |
| <i>Schip1</i>   |               | Schip1   | Schip1   |                              |       |
| <i>Scly</i>     | Scly          | Scly     |          |                              |       |
| <i>Scmh1</i>    |               |          | Scmh1    |                              | Scmh1 |
| <i>Scml4</i>    | Scml4         | Scml4    |          |                              |       |
| <i>Scn11a</i>   |               | Scn11a   |          |                              |       |
| <i>Scn2b</i>    |               | Scn2b    | Scn2b    |                              |       |
| <i>Scn3b</i>    | Scn3b         |          |          |                              |       |
| <i>Scn4b</i>    | Scn4b         |          |          |                              |       |
| <i>Scn9a</i>    |               |          | Scn9a    |                              |       |
| <i>Sco1</i>     |               |          | Sco1     |                              | Sco1  |
| <i>Sco2</i>     |               | Sco2     | Sco2     |                              |       |
| <i>Scoc</i>     | Scoc          |          |          |                              |       |
| <i>Scpep1</i>   | Scpep1        | Scpep1   | Scpep1   |                              |       |
| <i>Scrn1</i>    |               |          | Scrn1    |                              | Scrn1 |
| <i>Scrn3</i>    |               | Scrn3    |          |                              |       |
| <i>Scrt1</i>    | Scrt1         | Scrt1    | Scrt1    |                              |       |
| <i>Scube3</i>   |               | Scube3   |          |                              |       |
| <i>Scyl1</i>    |               | Scyl1    |          |                              |       |
| <i>Scyl2</i>    |               | Scyl2    | Scyl2    |                              |       |
| <i>Sdc2</i>     |               | Sdc2     |          |                              |       |
| <i>Sdc3</i>     | Sdc3          | Sdc3     | Sdc3     |                              |       |
| <i>Sdcbp2</i>   |               | Sdcbp2   |          |                              |       |
| <i>Sdccag8</i>  |               | Sdccag8  | Sdccag8  |                              |       |
| <i>Sde2</i>     |               | Sde2     |          |                              |       |
| <i>Sdf2l1</i>   | Sdf2l1        |          |          |                              |       |
| <i>Sdf4</i>     |               | Sdf4     | Sdf4     |                              |       |
| <i>Sdha</i>     |               |          | Sdha     |                              |       |
| <i>Sdhaf1</i>   |               | Sdhaf1   |          |                              |       |
| <i>Sdk1</i>     |               |          | Sdk1     |                              | Sdk1  |
| <i>Sdr39u1</i>  |               |          | Sdr39u1  |                              |       |
| <i>Sds</i>      | Sds           |          |          |                              |       |

Suppl. Table 1  
(182/234)

|                 | CHIP-Seq hits  |                 |                 | Unique hits with interactors |               |
|-----------------|----------------|-----------------|-----------------|------------------------------|---------------|
|                 | unstimulated   | Ac              | LPS             | Ac                           | LPS           |
| <i>Sebox</i>    |                |                 | <i>Sebox</i>    |                              |               |
| <i>Sec14l2</i>  |                | <i>Sec14l2</i>  |                 |                              |               |
| <i>Sec14l4</i>  |                | <i>Sec14l4</i>  | <i>Sec14l4</i>  |                              |               |
| <i>Sec22b</i>   | <i>Sec22b</i>  |                 |                 |                              |               |
| <i>Sec23b</i>   |                |                 | <i>Sec23b</i>   |                              |               |
| <i>Sec23ip</i>  |                | <i>Sec23ip</i>  |                 | <i>Sec23ip</i>               |               |
| <i>Sec24a</i>   |                | <i>Sec24a</i>   |                 | <i>Sec24a</i>                |               |
| <i>Sec24b</i>   |                |                 | <i>Sec24b</i>   |                              |               |
| <i>Sec24c</i>   | <i>Sec24c</i>  | <i>Sec24c</i>   | <i>Sec24c</i>   |                              |               |
| <i>Sec24d</i>   |                | <i>Sec24d</i>   | <i>Sec24d</i>   |                              |               |
| <i>Sec31b</i>   |                | <i>Sec31b</i>   |                 |                              |               |
| <i>Sec61a2</i>  |                | <i>Sec61a2</i>  |                 | <i>Sec61a2</i>               |               |
| <i>Sec61b</i>   | <i>Sec61b</i>  |                 |                 |                              |               |
| <i>Sec61g</i>   | <i>Sec61g</i>  |                 |                 |                              |               |
| <i>Sec62</i>    |                |                 | <i>Sec62</i>    |                              |               |
| <i>Secisbp2</i> |                | <i>Secisbp2</i> | <i>Secisbp2</i> |                              |               |
| <i>Sectm1a</i>  | <i>Sectm1a</i> |                 |                 |                              |               |
| <i>Seh1l</i>    |                | <i>Seh1l</i>    |                 |                              |               |
| <i>Sel1l</i>    |                | <i>Sel1l</i>    | <i>Sel1l</i>    |                              |               |
| <i>Sel1l2</i>   |                |                 | <i>Sel1l2</i>   |                              |               |
| <i>Selenbp1</i> |                | <i>Selenbp1</i> |                 |                              |               |
| <i>Sell</i>     | <i>Sell</i>    | <i>Sell</i>     | <i>Sell</i>     |                              |               |
| <i>Selp</i>     |                |                 | <i>Selp</i>     |                              | <i>Selp</i>   |
| <i>Selplg</i>   |                | <i>Selplg</i>   | <i>Selplg</i>   |                              |               |
| <i>Selt</i>     |                | <i>Selt</i>     | <i>Selt</i>     |                              |               |
| <i>Sema3e</i>   |                | <i>Sema3e</i>   |                 | <i>Sema3e</i>                |               |
| <i>Sema3g</i>   |                | <i>Sema3g</i>   |                 |                              |               |
| <i>Sema4a</i>   |                | <i>Sema4a</i>   |                 |                              |               |
| <i>Sema4g</i>   |                |                 | <i>Sema4g</i>   |                              | <i>Sema4g</i> |
| <i>Sema5a</i>   | <i>Sema5a</i>  | <i>Sema5a</i>   | <i>Sema5a</i>   |                              |               |
| <i>Sema6c</i>   |                | <i>Sema6c</i>   |                 |                              |               |
| <i>Sema6d</i>   | <i>Sema6d</i>  | <i>Sema6d</i>   |                 |                              |               |
| <i>Sema7a</i>   |                | <i>Sema7a</i>   |                 |                              |               |
| <i>Senp1</i>    | <i>Senp1</i>   |                 |                 |                              |               |
| <i>Senp2</i>    | <i>Senp2</i>   | <i>Senp2</i>    |                 |                              |               |
| <i>Senp5</i>    | <i>Senp5</i>   | <i>Senp5</i>    | <i>Senp5</i>    |                              |               |
| <i>Senp6</i>    | <i>Senp6</i>   |                 |                 |                              |               |
| <i>Senp7</i>    | <i>Senp7</i>   |                 |                 |                              |               |
| <i>Senp8</i>    |                |                 | <i>Senp8</i>    |                              | <i>Senp8</i>  |
| <i>Sephs2</i>   |                |                 | <i>Sephs2</i>   |                              |               |
| <i>Sepp1</i>    |                |                 | <i>Sepp1</i>    |                              | <i>Sepp1</i>  |
| <i>Sep 01</i>   |                |                 |                 |                              |               |
| <i>Sep 11</i>   |                |                 |                 |                              |               |
| <i>Sep 12</i>   |                |                 |                 |                              |               |
| <i>Sep 14</i>   |                |                 |                 |                              |               |
| <i>Sep 02</i>   |                |                 |                 |                              |               |
| <i>Sep 05</i>   |                |                 |                 |                              |               |
| <i>Sep 09</i>   |                |                 |                 |                              |               |

Suppl. Table 1  
(183/234)

|                     | ChIP-Seq hits    |                     |                  | Unique hits with interactors |                 |
|---------------------|------------------|---------------------|------------------|------------------------------|-----------------|
|                     | unstimulated     | Ac                  | LPS              | Ac                           | LPS             |
| <i>Sepw1</i>        |                  | <i>Sepw1</i>        |                  |                              |                 |
| <i>Serbp1</i>       |                  | <i>Serbp1</i>       |                  |                              |                 |
| <i>Serf1</i>        |                  |                     | <i>Serf1</i>     |                              |                 |
| <i>Serf2</i>        |                  | <i>Serf2</i>        | <i>Serf2</i>     |                              |                 |
| <i>Serhl</i>        |                  |                     | <i>Serhl</i>     |                              |                 |
| <i>Serinc2</i>      | <i>Serinc2</i>   |                     |                  |                              |                 |
| <i>Serinc3</i>      | <i>Serinc3</i>   | <i>Serinc3</i>      | <i>Serinc3</i>   |                              |                 |
| <i>Serinc5</i>      |                  | <i>Serinc5</i>      | <i>Serinc5</i>   |                              |                 |
| <i>Serp1</i>        | <i>Serp1</i>     | <i>Serp1</i>        | <i>Serp1</i>     |                              |                 |
| <i>Serpina1a</i>    |                  |                     | <i>Serpina1a</i> |                              |                 |
| <i>Serpina1c</i>    |                  | <i>Serpina1c</i>    |                  |                              |                 |
| <i>Serpina3a</i>    |                  | <i>Serpina3a</i>    | <i>Serpina3a</i> |                              |                 |
| <i>Serpina3i</i>    | <i>Serpina3i</i> | <i>Serpina3i</i>    | <i>Serpina3i</i> |                              |                 |
| <i>Serpina3j</i>    |                  | <i>Serpina3j</i>    | <i>Serpina3j</i> |                              |                 |
| <i>Serpina3k</i>    |                  | <i>Serpina3k</i>    |                  |                              |                 |
| <i>Serpina3n</i>    | <i>Serpina3n</i> |                     |                  |                              |                 |
| <i>Serpina4-ps1</i> |                  | <i>Serpina4-ps1</i> |                  |                              |                 |
| <i>Serpina5</i>     |                  | <i>Serpina5</i>     |                  |                              |                 |
| <i>Serpinb10</i>    | <i>Serpinb10</i> |                     | <i>Serpinb10</i> |                              |                 |
| <i>Serpinb11</i>    |                  |                     | <i>Serpinb11</i> |                              |                 |
| <i>Serpinb12</i>    |                  | <i>Serpinb12</i>    |                  |                              |                 |
| <i>Serpinb1b</i>    |                  |                     | <i>Serpinb1b</i> |                              |                 |
| <i>Serpinb5</i>     | <i>Serpinb5</i>  | <i>Serpinb5</i>     |                  |                              |                 |
| <i>Serpinb6c</i>    |                  |                     | <i>Serpinb6c</i> |                              |                 |
| <i>Serpinb6d</i>    |                  |                     | <i>Serpinb6d</i> |                              |                 |
| <i>Serpinb9</i>     |                  |                     | <i>Serpinb9</i>  |                              | <i>Serpinb9</i> |
| <i>Serpinb9b</i>    |                  | <i>Serpinb9b</i>    |                  |                              |                 |
| <i>Serpinb9d</i>    |                  |                     | <i>Serpinb9d</i> |                              |                 |
| <i>Serpinb9g</i>    | <i>Serpinb9g</i> |                     |                  |                              |                 |
| <i>Serpine2</i>     |                  | <i>Serpine2</i>     |                  |                              |                 |
| <i>Serpinf1</i>     |                  | <i>Serpinf1</i>     |                  |                              |                 |
| <i>Serpinf2</i>     | <i>Serpinf2</i>  |                     |                  |                              |                 |
| <i>Serpini1</i>     |                  | <i>Serpini1</i>     |                  |                              |                 |
| <i>Sertad1</i>      |                  | <i>Sertad1</i>      | <i>Sertad1</i>   |                              |                 |
| <i>Sertad2</i>      |                  |                     | <i>Sertad2</i>   |                              |                 |
| <i>Sesn1</i>        | <i>Sesn1</i>     |                     | <i>Sesn1</i>     |                              |                 |
| <i>Sesn2</i>        |                  |                     | <i>Sesn2</i>     |                              |                 |
| <i>Set</i>          | <i>Set</i>       | <i>Set</i>          | <i>Set</i>       |                              |                 |
| <i>Setd1a</i>       |                  | <i>Setd1a</i>       |                  |                              |                 |
| <i>Setd2</i>        |                  |                     | <i>Setd2</i>     |                              |                 |
| <i>Setd5</i>        |                  |                     | <i>Setd5</i>     |                              | <i>Setd5</i>    |
| <i>Setd7</i>        |                  |                     | <i>Setd7</i>     |                              | <i>Setd7</i>    |
| <i>Setdb2</i>       | <i>Setdb2</i>    |                     | <i>Setdb2</i>    |                              |                 |
| <i>Setmar</i>       |                  |                     | <i>Setmar</i>    |                              |                 |
| <i>Setx</i>         |                  | <i>Setx</i>         | <i>Setx</i>      |                              |                 |
| <i>Sez6l2</i>       |                  | <i>Sez6l2</i>       |                  |                              |                 |
| <i>Sf1</i>          |                  | <i>Sf1</i>          |                  | <i>Sf1</i>                   |                 |
| <i>Sf3a1</i>        | <i>Sf3a1</i>     | <i>Sf3a1</i>        | <i>Sf3a1</i>     |                              |                 |
| <i>Sf3b2</i>        |                  |                     | <i>Sf3b2</i>     |                              |                 |

Suppl. Table 1  
(184/234)

|                 | CHIP-Seq hits  |                 |                 | Unique hits with interactors |               |
|-----------------|----------------|-----------------|-----------------|------------------------------|---------------|
|                 | unstimulated   | Ac              | LPS             | Ac                           | LPS           |
| <i>Sf3b3</i>    |                | <i>Sf3b3</i>    | <i>Sf3b3</i>    |                              |               |
| <i>Sf3b4</i>    | <i>Sf3b4</i>   |                 | <i>Sf3b4</i>    |                              |               |
| <i>Sfi1</i>     | <i>Sfi1</i>    | <i>Sfi1</i>     | <i>Sfi1</i>     |                              |               |
| <i>Sfmbt1</i>   |                |                 | <i>Sfmbt1</i>   |                              |               |
| <i>Sfpq</i>     | <i>Sfpq</i>    | <i>Sfpq</i>     | <i>Sfpq</i>     |                              |               |
| <i>Sfrp2</i>    | <i>Sfrp2</i>   |                 |                 |                              |               |
| <i>Sft2d1</i>   |                | <i>Sft2d1</i>   |                 |                              |               |
| <i>Sft2d2</i>   |                |                 | <i>Sft2d2</i>   |                              |               |
| <i>Sft2d3</i>   |                | <i>Sft2d3</i>   |                 |                              |               |
| <i>Sfta2</i>    |                | <i>Sfta2</i>    |                 |                              |               |
| <i>Sftpb</i>    | <i>Sftpb</i>   |                 | <i>Sftpb</i>    |                              |               |
| <i>Sfxn4</i>    |                | <i>Sfxn4</i>    |                 | <i>Sfxn4</i>                 |               |
| <i>Sgca</i>     |                | <i>Sgca</i>     | <i>Sgca</i>     |                              |               |
| <i>Sgip1</i>    | <i>Sgip1</i>   |                 |                 |                              |               |
| <i>Sgk1</i>     |                | <i>Sgk1</i>     | <i>Sgk1</i>     |                              |               |
| <i>Sgol1</i>    | <i>Sgol1</i>   |                 | <i>Sgol1</i>    |                              |               |
| <i>Sgol2a</i>   |                | <i>Sgol2a</i>   | <i>Sgol2a</i>   |                              |               |
| <i>Sgpl1</i>    |                | <i>Sgpl1</i>    |                 |                              |               |
| <i>Sgpp1</i>    | <i>Sgpp1</i>   | <i>Sgpp1</i>    |                 |                              |               |
| <i>Sgsh</i>     | <i>Sgsh</i>    |                 |                 |                              |               |
| <i>Sgsm1</i>    |                |                 | <i>Sgsm1</i>    |                              |               |
| <i>Sgsm2</i>    |                | <i>Sgsm2</i>    | <i>Sgsm2</i>    |                              |               |
| <i>Sgsm3</i>    | <i>Sgsm3</i>   |                 | <i>Sgsm3</i>    |                              |               |
| <i>Sgta</i>     |                | <i>Sgta</i>     |                 |                              |               |
| <i>Sh2b1</i>    | <i>Sh2b1</i>   |                 |                 |                              |               |
| <i>Sh2d1b2</i>  |                |                 | <i>Sh2d1b2</i>  |                              |               |
| <i>Sh2d2a</i>   |                | <i>Sh2d2a</i>   |                 | <i>Sh2d2a</i>                |               |
| <i>Sh2d3c</i>   |                |                 | <i>Sh2d3c</i>   |                              |               |
| <i>Sh2d4b</i>   | <i>Sh2d4b</i>  |                 |                 |                              |               |
| <i>Sh2d5</i>    |                | <i>Sh2d5</i>    |                 |                              |               |
| <i>Sh3bgr</i>   | <i>Sh3bgr</i>  |                 | <i>Sh3bgr</i>   |                              |               |
| <i>Sh3bgrl</i>  | <i>Sh3bgrl</i> |                 | <i>Sh3bgrl</i>  |                              |               |
| <i>Sh3bgrl2</i> |                |                 | <i>Sh3bgrl2</i> |                              |               |
| <i>Sh3bp2</i>   |                |                 | <i>Sh3bp2</i>   |                              |               |
| <i>Sh3d21</i>   |                | <i>Sh3d21</i>   |                 |                              |               |
| <i>Sh3gl1</i>   | <i>Sh3gl1</i>  |                 |                 |                              |               |
| <i>Sh3gl3</i>   |                | <i>Sh3gl3</i>   |                 |                              |               |
| <i>Sh3glb2</i>  |                |                 | <i>Sh3glb2</i>  |                              |               |
| <i>Sh3kbp1</i>  |                | <i>Sh3kbp1</i>  |                 |                              |               |
| <i>Sh3pxd2b</i> |                | <i>Sh3pxd2b</i> |                 | <i>Sh3pxd2b</i>              |               |
| <i>Sh3rf2</i>   |                |                 | <i>Sh3rf2</i>   |                              | <i>Sh3rf2</i> |
| <i>Sh3tc1</i>   |                | <i>Sh3tc1</i>   | <i>Sh3tc1</i>   |                              |               |
| <i>Sh3tc2</i>   | <i>Sh3tc2</i>  |                 |                 |                              |               |
| <i>Shank3</i>   | <i>Shank3</i>  |                 |                 |                              |               |
| <i>Shb</i>      | <i>Shb</i>     | <i>Shb</i>      |                 |                              |               |
| <i>Shbg</i>     |                |                 | <i>Shbg</i>     |                              |               |
| <i>Shc1</i>     | <i>Shc1</i>    | <i>Shc1</i>     | <i>Shc1</i>     |                              |               |
| <i>Shc2</i>     | <i>Shc2</i>    |                 |                 |                              |               |
| <i>Shcbp1l</i>  |                | <i>Shcbp1l</i>  |                 |                              |               |



Suppl. Table 1  
(185/234)

|                | CHIP-Seq hits |         |         | Unique hits with interactors |       |
|----------------|---------------|---------|---------|------------------------------|-------|
|                | unstimulated  | Ac      | LPS     | Ac                           | LPS   |
| <i>Shf</i>     |               |         | Shf     |                              |       |
| <i>Shisa2</i>  | Shisa2        |         |         |                              |       |
| <i>Shisa5</i>  |               | Shisa5  |         |                              |       |
| <i>Shisa7</i>  |               |         | Shisa7  |                              |       |
| <i>Shisa8</i>  |               | Shisa8  | Shisa8  |                              |       |
| <i>Shisa9</i>  |               |         | Shisa9  |                              |       |
| <i>Shoc2</i>   | Shoc2         |         |         |                              |       |
| <i>Shox2</i>   |               | Shox2   |         |                              |       |
| <i>Shprh</i>   | Shprh         |         | Shprh   |                              |       |
| <i>Shq1</i>    |               |         | Shq1    |                              |       |
| <i>Shroom2</i> | Shroom2       | Shroom2 | Shroom2 |                              |       |
| <i>Shroom3</i> | Shroom3       | Shroom3 | Shroom3 |                              |       |
| <i>Shroom4</i> |               |         | Shroom4 |                              |       |
| <i>Siae</i>    |               | Siae    |         |                              |       |
| <i>Siah1a</i>  |               | Siah1a  |         |                              |       |
| <i>Siah1b</i>  |               | Siah1b  | Siah1b  |                              |       |
| <i>Siah2</i>   |               |         | Siah2   |                              |       |
| <i>Siah3</i>   |               |         | Siah3   |                              |       |
| <i>Sidt2</i>   | Sidt2         | Sidt2   | Sidt2   |                              |       |
| <i>Siglece</i> | Siglece       |         |         |                              |       |
| <i>Siglecf</i> |               |         | Siglecf |                              |       |
| <i>Sigmar1</i> | Sigmar1       | Sigmar1 | Sigmar1 |                              |       |
| <i>Sik1</i>    |               | Sik1    |         | Sik1                         |       |
| <i>Sik2</i>    |               | Sik2    |         |                              |       |
| <i>Sike1</i>   |               |         | Sike1   |                              | Sike1 |
| <i>Sim2</i>    | Sim2          | Sim2    | Sim2    |                              |       |
| <i>Simc1</i>   | Simc1         | Simc1   |         |                              |       |
| <i>Sin3b</i>   |               |         | Sin3b   |                              |       |
| <i>Sipa1</i>   |               |         | Sipa1   |                              |       |
| <i>Sirpb1a</i> | Sirpb1a       |         |         |                              |       |
| <i>Sirt1</i>   |               | Sirt1   |         |                              |       |
| <i>Sirt2</i>   |               | Sirt2   | Sirt2   |                              |       |
| <i>Sirt4</i>   |               |         | Sirt4   |                              |       |
| <i>Sirt6</i>   |               | Sirt6   |         |                              |       |
| <i>Sirt7</i>   |               | Sirt7   | Sirt7   |                              |       |
| <i>Sis</i>     |               | Sis     |         |                              |       |
| <i>Sit1</i>    |               | Sit1    |         |                              |       |
| <i>Six3</i>    |               | Six3    |         | Six3                         |       |
| <i>Six3os1</i> |               | Six3os1 |         |                              |       |
| <i>Six6</i>    |               | Six6    | Six6    |                              |       |
| <i>Ska1</i>    |               | Ska1    | Ska1    |                              |       |
| <i>Skap1</i>   |               |         | Skap1   |                              |       |
| <i>Skap2</i>   |               | Skap2   |         |                              |       |
| <i>Skida1</i>  | Skida1        |         | Skida1  |                              |       |
| <i>Skil</i>    | Skil          |         | Skil    |                              |       |
| <i>Skint10</i> | Skint10       |         |         |                              |       |
| <i>Skint2</i>  | Skint2        |         |         |                              |       |
| <i>Skint3</i>  | Skint3        |         | Skint3  |                              |       |
| <i>Skint4</i>  |               |         | Skint4  |                              |       |

Suppl. Table 1  
(186/234)

|                  | ChIP-Seq hits |           |          | Unique hits with interactors |         |
|------------------|---------------|-----------|----------|------------------------------|---------|
|                  | unstimulated  | Ac        | LPS      | Ac                           | LPS     |
| <i>Skiv2l2</i>   | Skiv2l2       | Skiv2l2   |          |                              |         |
| <i>Skor1</i>     |               | Skor1     | Skor1    |                              |         |
| <i>Skp2</i>      |               | Skp2      |          |                              |         |
| <i>Sla</i>       | Sla           |           |          |                              |         |
| <i>Slain1</i>    |               | Slain1    |          |                              |         |
| <i>Slain2</i>    |               | Slain2    | Slain2   |                              |         |
| <i>Slamf7</i>    |               | Slamf7    |          |                              |         |
| <i>Slamf8</i>    |               | Slamf8    |          | Slamf8                       |         |
| <i>Slbp</i>      |               | Slbp      |          |                              |         |
| <i>Slc10a3</i>   |               | Slc10a3   |          |                              |         |
| <i>Slc10a5</i>   |               |           | Slc10a5  |                              |         |
| <i>Slc10a7</i>   |               |           | Slc10a7  |                              | Slc10a7 |
| <i>Slc11a1</i>   |               |           | Slc11a1  |                              |         |
| <i>Slc12a3</i>   | Slc12a3       |           |          |                              |         |
| <i>Slc12a4</i>   |               | Slc12a4   | Slc12a4  |                              |         |
| <i>Slc12a6</i>   |               | Slc12a6   |          |                              |         |
| <i>Slc12a8</i>   |               | Slc12a8   |          | Slc12a8                      |         |
| <i>Slc12a9</i>   |               | Slc12a9   |          |                              |         |
| <i>Slc13a1</i>   |               | Slc13a1   |          |                              |         |
| <i>Slc13a2os</i> |               | Slc13a2os |          |                              |         |
| <i>Slc13a5</i>   | Slc13a5       | Slc13a5   |          |                              |         |
| <i>Slc14a1</i>   |               |           | Slc14a1  |                              |         |
| <i>Slc14a2</i>   |               | Slc14a2   |          |                              |         |
| <i>Slc16a1</i>   | Slc16a1       | Slc16a1   | Slc16a1  |                              |         |
| <i>Slc16a10</i>  |               | Slc16a10  |          | Slc16a10                     |         |
| <i>Slc16a11</i>  | Slc16a11      | Slc16a11  | Slc16a11 |                              |         |
| <i>Slc16a14</i>  | Slc16a14      |           |          |                              |         |
| <i>Slc16a3</i>   |               |           | Slc16a3  |                              |         |
| <i>Slc16a4</i>   | Slc16a4       |           | Slc16a4  |                              |         |
| <i>Slc16a6</i>   | Slc16a6       | Slc16a6   |          |                              |         |
| <i>Slc17a1</i>   |               | Slc17a1   |          |                              |         |
| <i>Slc17a3</i>   |               |           | Slc17a3  |                              |         |
| <i>Slc17a5</i>   | Slc17a5       | Slc17a5   |          |                              |         |
| <i>Slc17a6</i>   |               |           | Slc17a6  |                              |         |
| <i>Slc17a9</i>   |               | Slc17a9   |          |                              |         |
| <i>Slc18b1</i>   | Slc18b1       |           |          |                              |         |
| <i>Slc19a1</i>   | Slc19a1       |           | Slc19a1  |                              |         |
| <i>Slc1a2</i>    | Slc1a2        | Slc1a2    | Slc1a2   |                              |         |
| <i>Slc1a3</i>    |               | Slc1a3    |          |                              |         |
| <i>Slc1a6</i>    |               |           | Slc1a6   |                              |         |
| <i>Slc20a1</i>   |               |           | Slc20a1  |                              |         |
| <i>Slc22a13</i>  | Slc22a13      | Slc22a13  |          |                              |         |
| <i>Slc22a16</i>  |               |           | Slc22a16 |                              |         |
| <i>Slc22a2</i>   |               | Slc22a2   |          |                              |         |
| <i>Slc22a22</i>  |               | Slc22a22  |          |                              |         |
| <i>Slc22a26</i>  |               | Slc22a26  | Slc22a26 |                              |         |
| <i>Slc22a3</i>   | Slc22a3       |           |          |                              |         |
| <i>Slc22a8</i>   | Slc22a8       | Slc22a8   | Slc22a8  |                              |         |
| <i>Slc23a1</i>   |               |           | Slc23a1  |                              | Slc23a1 |

Suppl. Table 1  
(187/234)

|                 | CHIP-Seq hits   |                 |                 | Unique hits with interactors |                 |
|-----------------|-----------------|-----------------|-----------------|------------------------------|-----------------|
|                 | unstimulated    | Ac              | LPS             | Ac                           | LPS             |
| <i>Slc24a2</i>  |                 | <i>Slc24a2</i>  | <i>Slc24a2</i>  |                              |                 |
| <i>Slc24a5</i>  | <i>Slc24a5</i>  | <i>Slc24a5</i>  | <i>Slc24a5</i>  |                              |                 |
| <i>Slc25a1</i>  |                 |                 | <i>Slc25a1</i>  |                              |                 |
| <i>Slc25a11</i> |                 | <i>Slc25a11</i> | <i>Slc25a11</i> |                              |                 |
| <i>Slc25a12</i> |                 |                 | <i>Slc25a12</i> |                              |                 |
| <i>Slc25a14</i> | <i>Slc25a14</i> | <i>Slc25a14</i> |                 |                              |                 |
| <i>Slc25a15</i> | <i>Slc25a15</i> |                 |                 |                              |                 |
| <i>Slc25a16</i> |                 | <i>Slc25a16</i> | <i>Slc25a16</i> |                              |                 |
| <i>Slc25a17</i> | <i>Slc25a17</i> | <i>Slc25a17</i> | <i>Slc25a17</i> |                              |                 |
| <i>Slc25a18</i> |                 |                 | <i>Slc25a18</i> |                              |                 |
| <i>Slc25a2</i>  |                 | <i>Slc25a2</i>  | <i>Slc25a2</i>  |                              |                 |
| <i>Slc25a20</i> | <i>Slc25a20</i> | <i>Slc25a20</i> | <i>Slc25a20</i> |                              |                 |
| <i>Slc25a21</i> |                 | <i>Slc25a21</i> | <i>Slc25a21</i> |                              |                 |
| <i>Slc25a22</i> |                 | <i>Slc25a22</i> |                 | <i>Slc25a22</i>              |                 |
| <i>Slc25a23</i> |                 |                 | <i>Slc25a23</i> |                              |                 |
| <i>Slc25a24</i> |                 | <i>Slc25a24</i> |                 |                              |                 |
| <i>Slc25a25</i> |                 | <i>Slc25a25</i> | <i>Slc25a25</i> |                              |                 |
| <i>Slc25a27</i> |                 |                 | <i>Slc25a27</i> |                              | <i>Slc25a27</i> |
| <i>Slc25a28</i> | <i>Slc25a28</i> | <i>Slc25a28</i> | <i>Slc25a28</i> |                              |                 |
| <i>Slc25a29</i> |                 | <i>Slc25a29</i> |                 |                              |                 |
| <i>Slc25a3</i>  |                 | <i>Slc25a3</i>  |                 |                              |                 |
| <i>Slc25a30</i> | <i>Slc25a30</i> | <i>Slc25a30</i> |                 |                              |                 |
| <i>Slc25a32</i> |                 |                 | <i>Slc25a32</i> |                              |                 |
| <i>Slc25a33</i> |                 |                 | <i>Slc25a33</i> |                              |                 |
| <i>Slc25a35</i> | <i>Slc25a35</i> |                 | <i>Slc25a35</i> |                              |                 |
| <i>Slc25a38</i> |                 | <i>Slc25a38</i> | <i>Slc25a38</i> |                              |                 |
| <i>Slc25a39</i> |                 | <i>Slc25a39</i> |                 | <i>Slc25a39</i>              |                 |
| <i>Slc25a4</i>  |                 | <i>Slc25a4</i>  |                 | <i>Slc25a4</i>               |                 |
| <i>Slc25a40</i> |                 | <i>Slc25a40</i> |                 |                              |                 |
| <i>Slc25a41</i> |                 |                 | <i>Slc25a41</i> |                              |                 |
| <i>Slc25a42</i> |                 |                 | <i>Slc25a42</i> |                              | <i>Slc25a42</i> |
| <i>Slc25a44</i> |                 |                 | <i>Slc25a44</i> |                              |                 |
| <i>Slc25a47</i> |                 | <i>Slc25a47</i> | <i>Slc25a47</i> |                              |                 |
| <i>Slc25a48</i> |                 | <i>Slc25a48</i> |                 |                              |                 |
| <i>Slc25a5</i>  |                 | <i>Slc25a5</i>  |                 |                              |                 |
| <i>Slc25a51</i> |                 | <i>Slc25a51</i> |                 | <i>Slc25a51</i>              |                 |
| <i>Slc25a53</i> |                 |                 | <i>Slc25a53</i> |                              |                 |
| <i>Slc26a1</i>  |                 | <i>Slc26a1</i>  | <i>Slc26a1</i>  |                              |                 |
| <i>Slc26a10</i> |                 | <i>Slc26a10</i> |                 |                              |                 |
| <i>Slc26a2</i>  |                 | <i>Slc26a2</i>  |                 |                              |                 |
| <i>Slc26a3</i>  | <i>Slc26a3</i>  | <i>Slc26a3</i>  |                 |                              |                 |
| <i>Slc26a5</i>  |                 | <i>Slc26a5</i>  |                 |                              |                 |
| <i>Slc26a9</i>  | <i>Slc26a9</i>  |                 |                 |                              |                 |
| <i>Slc27a1</i>  |                 |                 | <i>Slc27a1</i>  |                              | <i>Slc27a1</i>  |
| <i>Slc27a2</i>  |                 |                 | <i>Slc27a2</i>  |                              |                 |
| <i>Slc27a4</i>  |                 | <i>Slc27a4</i>  |                 |                              |                 |
| <i>Slc27a5</i>  | <i>Slc27a5</i>  |                 |                 |                              |                 |
| <i>Slc27a6</i>  | <i>Slc27a6</i>  | <i>Slc27a6</i>  |                 |                              |                 |
| <i>Slc28a2</i>  |                 | <i>Slc28a2</i>  | <i>Slc28a2</i>  |                              |                 |

Suppl. Table 1  
(188/234)

|                    | CHIP-Seq hits      |                    |                    | Unique hits with interactors |                 |
|--------------------|--------------------|--------------------|--------------------|------------------------------|-----------------|
|                    | unstimulated       | Ac                 | LPS                | Ac                           | LPS             |
| <i>Slc28a3</i>     | <i>Slc28a3</i>     | <i>Slc28a3</i>     | <i>Slc28a3</i>     |                              |                 |
| <i>Slc29a1</i>     | <i>Slc29a1</i>     |                    |                    |                              |                 |
| <i>Slc29a2</i>     | <i>Slc29a2</i>     |                    | <i>Slc29a2</i>     |                              |                 |
| <i>Slc2a3</i>      |                    | <i>Slc2a3</i>      | <i>Slc2a3</i>      |                              |                 |
| <i>Slc2a4rg-ps</i> | <i>Slc2a4rg-ps</i> | <i>Slc2a4rg-ps</i> | <i>Slc2a4rg-ps</i> |                              |                 |
| <i>Slc2a5</i>      |                    | <i>Slc2a5</i>      | <i>Slc2a5</i>      |                              |                 |
| <i>Slc2a7</i>      |                    |                    | <i>Slc2a7</i>      |                              |                 |
| <i>Slc2a8</i>      |                    | <i>Slc2a8</i>      |                    |                              |                 |
| <i>Slc2a9</i>      |                    |                    | <i>Slc2a9</i>      |                              |                 |
| <i>Slc30a1</i>     |                    |                    | <i>Slc30a1</i>     |                              |                 |
| <i>Slc30a10</i>    | <i>Slc30a10</i>    |                    |                    |                              |                 |
| <i>Slc30a3</i>     |                    | <i>Slc30a3</i>     |                    |                              |                 |
| <i>Slc30a4</i>     |                    | <i>Slc30a4</i>     |                    |                              |                 |
| <i>Slc30a5</i>     | <i>Slc30a5</i>     | <i>Slc30a5</i>     | <i>Slc30a5</i>     |                              |                 |
| <i>Slc31a1</i>     |                    | <i>Slc31a1</i>     |                    | <i>Slc31a1</i>               |                 |
| <i>Slc31a2</i>     |                    | <i>Slc31a2</i>     | <i>Slc31a2</i>     |                              |                 |
| <i>Slc32a1</i>     |                    |                    | <i>Slc32a1</i>     |                              |                 |
| <i>Slc35a4</i>     | <i>Slc35a4</i>     |                    |                    |                              |                 |
| <i>Slc35a5</i>     |                    |                    | <i>Slc35a5</i>     |                              |                 |
| <i>Slc35b1</i>     | <i>Slc35b1</i>     |                    | <i>Slc35b1</i>     |                              |                 |
| <i>Slc35b2</i>     |                    |                    | <i>Slc35b2</i>     |                              |                 |
| <i>Slc35b3</i>     | <i>Slc35b3</i>     |                    |                    |                              |                 |
| <i>Slc35b4</i>     | <i>Slc35b4</i>     |                    |                    |                              |                 |
| <i>Slc35c1</i>     |                    |                    | <i>Slc35c1</i>     |                              |                 |
| <i>Slc35d2</i>     | <i>Slc35d2</i>     | <i>Slc35d2</i>     | <i>Slc35d2</i>     |                              |                 |
| <i>Slc35d3</i>     |                    | <i>Slc35d3</i>     | <i>Slc35d3</i>     |                              |                 |
| <i>Slc35e2</i>     |                    | <i>Slc35e2</i>     |                    | <i>Slc35e2</i>               |                 |
| <i>Slc35e4</i>     |                    |                    | <i>Slc35e4</i>     |                              |                 |
| <i>Slc35f1</i>     |                    | <i>Slc35f1</i>     |                    |                              |                 |
| <i>Slc35f2</i>     |                    | <i>Slc35f2</i>     | <i>Slc35f2</i>     |                              |                 |
| <i>Slc35f5</i>     |                    |                    | <i>Slc35f5</i>     |                              |                 |
| <i>Slc36a1os</i>   |                    | <i>Slc36a1os</i>   | <i>Slc36a1os</i>   |                              |                 |
| <i>Slc36a4</i>     |                    |                    | <i>Slc36a4</i>     |                              |                 |
| <i>Slc37a3</i>     |                    | <i>Slc37a3</i>     | <i>Slc37a3</i>     |                              |                 |
| <i>Slc38a10</i>    |                    | <i>Slc38a10</i>    | <i>Slc38a10</i>    |                              |                 |
| <i>Slc38a2</i>     |                    | <i>Slc38a2</i>     |                    | <i>Slc38a2</i>               |                 |
| <i>Slc38a4</i>     |                    | <i>Slc38a4</i>     |                    |                              |                 |
| <i>Slc38a6</i>     |                    |                    | <i>Slc38a6</i>     |                              | <i>Slc38a6</i>  |
| <i>Slc38a7</i>     |                    |                    | <i>Slc38a7</i>     |                              |                 |
| <i>Slc38a9</i>     | <i>Slc38a9</i>     |                    |                    |                              |                 |
| <i>Slc39a10</i>    |                    |                    | <i>Slc39a10</i>    |                              | <i>Slc39a10</i> |
| <i>Slc39a11</i>    |                    | <i>Slc39a11</i>    |                    |                              |                 |
| <i>Slc39a13</i>    | <i>Slc39a13</i>    |                    |                    |                              |                 |
| <i>Slc39a2</i>     |                    |                    | <i>Slc39a2</i>     |                              |                 |
| <i>Slc39a3</i>     | <i>Slc39a3</i>     | <i>Slc39a3</i>     |                    |                              |                 |
| <i>Slc39a4</i>     | <i>Slc39a4</i>     | <i>Slc39a4</i>     | <i>Slc39a4</i>     |                              |                 |
| <i>Slc39a5</i>     | <i>Slc39a5</i>     | <i>Slc39a5</i>     | <i>Slc39a5</i>     |                              |                 |
| <i>Slc39a7</i>     |                    | <i>Slc39a7</i>     |                    |                              |                 |
| <i>Slc39a8</i>     |                    |                    | <i>Slc39a8</i>     |                              |                 |

Suppl. Table 1  
(189/234)

|                  | ChIP-Seq hits  |                 |                  | Unique hits with interactors |                |
|------------------|----------------|-----------------|------------------|------------------------------|----------------|
|                  | unstimulated   | Ac              | LPS              | Ac                           | LPS            |
| <i>Slc3a1</i>    |                | <i>Slc3a1</i>   |                  |                              |                |
| <i>Slc3a2</i>    | <i>Slc3a2</i>  | <i>Slc3a2</i>   | <i>Slc3a2</i>    |                              |                |
| <i>Slc40a1</i>   | <i>Slc40a1</i> |                 | <i>Slc40a1</i>   |                              |                |
| <i>Slc41a2</i>   |                |                 | <i>Slc41a2</i>   |                              |                |
| <i>Slc44a2</i>   |                |                 | <i>Slc44a2</i>   |                              | <i>Slc44a2</i> |
| <i>Slc44a4</i>   | <i>Slc44a4</i> | <i>Slc44a4</i>  | <i>Slc44a4</i>   |                              |                |
| <i>Slc44a5</i>   | <i>Slc44a5</i> | <i>Slc44a5</i>  | <i>Slc44a5</i>   |                              |                |
| <i>Slc45a2</i>   |                |                 | <i>Slc45a2</i>   |                              |                |
| <i>Slc45a4</i>   | <i>Slc45a4</i> | <i>Slc45a4</i>  | <i>Slc45a4</i>   |                              |                |
| <i>Slc46a1</i>   |                | <i>Slc46a1</i>  |                  |                              |                |
| <i>Slc46a3</i>   |                | <i>Slc46a3</i>  |                  |                              |                |
| <i>Slc48a1</i>   |                | <i>Slc48a1</i>  | <i>Slc48a1</i>   |                              |                |
| <i>Slc4a10</i>   | <i>Slc4a10</i> |                 |                  |                              |                |
| <i>Slc4a11</i>   |                | <i>Slc4a11</i>  | <i>Slc4a11</i>   |                              |                |
| <i>Slc4a1ap</i>  |                | <i>Slc4a1ap</i> |                  |                              |                |
| <i>Slc4a2</i>    |                | <i>Slc4a2</i>   |                  |                              |                |
| <i>Slc4a7</i>    | <i>Slc4a7</i>  | <i>Slc4a7</i>   | <i>Slc4a7</i>    |                              |                |
| <i>Slc4a9</i>    |                | <i>Slc4a9</i>   |                  |                              |                |
| <i>Slc50a1</i>   | <i>Slc50a1</i> |                 |                  |                              |                |
| <i>Slc5a10</i>   | <i>Slc5a10</i> | <i>Slc5a10</i>  |                  |                              |                |
| <i>Slc5a12</i>   |                | <i>Slc5a12</i>  |                  |                              |                |
| <i>Slc5a2</i>    |                | <i>Slc5a2</i>   |                  |                              |                |
| <i>Slc5a3</i>    |                |                 | <i>Slc5a3</i>    |                              | <i>Slc5a3</i>  |
| <i>Slc5a4a</i>   | <i>Slc5a4a</i> |                 |                  |                              |                |
| <i>Slc5a4b</i>   |                |                 | <i>Slc5a4b</i>   |                              |                |
| <i>Slc5a5</i>    |                | <i>Slc5a5</i>   |                  |                              |                |
| <i>Slc5a6</i>    | <i>Slc5a6</i>  | <i>Slc5a6</i>   | <i>Slc5a6</i>    |                              |                |
| <i>Slc5a8</i>    |                | <i>Slc5a8</i>   |                  | <i>Slc5a8</i>                |                |
| <i>Slc5a9</i>    |                | <i>Slc5a9</i>   |                  |                              |                |
| <i>Slc6a18</i>   |                |                 | <i>Slc6a18</i>   |                              |                |
| <i>Slc6a19os</i> |                |                 | <i>Slc6a19os</i> |                              |                |
| <i>Slc6a20a</i>  |                | <i>Slc6a20a</i> |                  |                              |                |
| <i>Slc6a20b</i>  |                | <i>Slc6a20b</i> | <i>Slc6a20b</i>  |                              |                |
| <i>Slc6a7</i>    | <i>Slc6a7</i>  |                 |                  |                              |                |
| <i>Slc7a11</i>   |                | <i>Slc7a11</i>  |                  | <i>Slc7a11</i>               |                |
| <i>Slc7a13</i>   | <i>Slc7a13</i> |                 |                  |                              |                |
| <i>Slc7a14</i>   |                | <i>Slc7a14</i>  |                  | <i>Slc7a14</i>               |                |
| <i>Slc7a2</i>    |                |                 | <i>Slc7a2</i>    |                              | <i>Slc7a2</i>  |
| <i>Slc7a4</i>    |                |                 | <i>Slc7a4</i>    |                              |                |
| <i>Slc7a6</i>    | <i>Slc7a6</i>  |                 |                  |                              |                |
| <i>Slc7a6os</i>  |                | <i>Slc7a6os</i> | <i>Slc7a6os</i>  |                              |                |
| <i>Slc7a7</i>    |                |                 | <i>Slc7a7</i>    |                              |                |
| <i>Slc7a8</i>    | <i>Slc7a8</i>  | <i>Slc7a8</i>   | <i>Slc7a8</i>    |                              |                |
| <i>Slc7a9</i>    |                | <i>Slc7a9</i>   | <i>Slc7a9</i>    |                              |                |
| <i>Slc9a1</i>    |                | <i>Slc9a1</i>   | <i>Slc9a1</i>    |                              |                |
| <i>Slc9a3r1</i>  |                | <i>Slc9a3r1</i> |                  |                              |                |
| <i>Slc9a3r2</i>  |                |                 | <i>Slc9a3r2</i>  |                              |                |
| <i>Slc9a5</i>    |                |                 | <i>Slc9a5</i>    |                              |                |
| <i>Slc9a8</i>    |                |                 | <i>Slc9a8</i>    |                              |                |

Suppl. Table 1  
(190/234)

|                   | ChIP-Seq hits   |                   |                   | Unique hits with interactors |                |
|-------------------|-----------------|-------------------|-------------------|------------------------------|----------------|
|                   | unstimulated    | Ac                | LPS               | Ac                           | LPS            |
| <i>Slc9a9</i>     |                 | <i>Slc9a9</i>     | <i>Slc9a9</i>     |                              |                |
| <i>Slc9b2</i>     |                 |                   | <i>Slc9b2</i>     |                              | <i>Slc9b2</i>  |
| <i>Slc9c1</i>     |                 | <i>Slc9c1</i>     | <i>Slc9c1</i>     |                              |                |
| <i>Slco1a1</i>    |                 |                   | <i>Slco1a1</i>    |                              |                |
| <i>Slco1a6</i>    |                 | <i>Slco1a6</i>    |                   |                              |                |
| <i>Slco5a1</i>    |                 | <i>Slco5a1</i>    |                   |                              |                |
| <i>Slco6b1</i>    |                 |                   | <i>Slco6b1</i>    |                              |                |
| <i>Slco6c1</i>    |                 | <i>Slco6c1</i>    |                   |                              |                |
| <i>Slco6d1</i>    | <i>Slco6d1</i>  |                   |                   |                              |                |
| <i>Slfn1</i>      | <i>Slfn1</i>    |                   |                   |                              |                |
| <i>Slfn3</i>      | <i>Slfn3</i>    |                   |                   |                              |                |
| <i>Slfn4</i>      |                 |                   | <i>Slfn4</i>      |                              |                |
| <i>Slfn5</i>      |                 |                   | <i>Slfn5</i>      |                              | <i>Slfn5</i>   |
| <i>Slfn5os</i>    |                 | <i>Slfn5os</i>    | <i>Slfn5os</i>    |                              |                |
| <i>Slfn9</i>      |                 | <i>Slfn9</i>      |                   |                              |                |
| <i>Slfnl1</i>     |                 | <i>Slfnl1</i>     |                   |                              |                |
| <i>Slirp</i>      |                 |                   | <i>Slirp</i>      |                              |                |
| <i>Slit1</i>      |                 | <i>Slit1</i>      |                   |                              |                |
| <i>Slitrk1</i>    |                 | <i>Slitrk1</i>    |                   |                              |                |
| <i>Slitrk3</i>    |                 |                   | <i>Slitrk3</i>    |                              |                |
| <i>Slitrk5</i>    |                 |                   | <i>Slitrk5</i>    |                              | <i>Slitrk5</i> |
| <i>Slitrk6</i>    |                 | <i>Slitrk6</i>    |                   |                              |                |
| <i>Slpi</i>       |                 | <i>Slpi</i>       |                   |                              |                |
| <i>Slu7</i>       |                 |                   | <i>Slu7</i>       |                              |                |
| <i>Slx1b</i>      |                 | <i>Slx1b</i>      |                   | <i>Slx1b</i>                 |                |
| <i>Slx4</i>       |                 |                   | <i>Slx4</i>       |                              |                |
| <i>Slx4ip</i>     | <i>Slx4ip</i>   | <i>Slx4ip</i>     | <i>Slx4ip</i>     |                              |                |
| <i>Smad2</i>      | <i>Smad2</i>    | <i>Smad2</i>      | <i>Smad2</i>      |                              |                |
| <i>Smad3</i>      |                 | <i>Smad3</i>      |                   | <i>Smad3</i>                 |                |
| <i>Smad4</i>      |                 |                   | <i>Smad4</i>      |                              | <i>Smad4</i>   |
| <i>Smad6</i>      |                 | <i>Smad6</i>      |                   | <i>Smad6</i>                 |                |
| <i>Smagp</i>      |                 |                   | <i>Smagp</i>      |                              |                |
| <i>Smapi1</i>     |                 | <i>Smapi1</i>     | <i>Smapi1</i>     |                              |                |
| <i>Smapi2</i>     |                 | <i>Smapi2</i>     |                   |                              |                |
| <i>Smarca2</i>    | <i>Smarca2</i>  | <i>Smarca2</i>    | <i>Smarca2</i>    |                              |                |
| <i>Smarca4</i>    | <i>Smarca4</i>  | <i>Smarca4</i>    | <i>Smarca4</i>    |                              |                |
| <i>Smarca5-ps</i> |                 | <i>Smarca5-ps</i> | <i>Smarca5-ps</i> |                              |                |
| <i>Smarcad1</i>   | <i>Smarcad1</i> |                   | <i>Smarcad1</i>   |                              |                |
| <i>Smarcc1</i>    |                 |                   | <i>Smarcc1</i>    |                              | <i>Smarcc1</i> |
| <i>Smarcc2</i>    | <i>Smarcc2</i>  |                   | <i>Smarcc2</i>    |                              |                |
| <i>Smarcd2</i>    |                 | <i>Smarcd2</i>    |                   |                              |                |
| <i>Smarcd3</i>    |                 |                   | <i>Smarcd3</i>    |                              |                |
| <i>Smc2</i>       | <i>Smc2</i>     |                   |                   |                              |                |
| <i>Smc2os</i>     | <i>Smc2os</i>   | <i>Smc2os</i>     | <i>Smc2os</i>     |                              |                |
| <i>Smc3</i>       | <i>Smc3</i>     |                   | <i>Smc3</i>       |                              |                |
| <i>Smc6</i>       |                 | <i>Smc6</i>       | <i>Smc6</i>       |                              |                |
| <i>Smchd1</i>     |                 |                   | <i>Smchd1</i>     |                              |                |
| <i>Smco2</i>      |                 | <i>Smco2</i>      |                   |                              |                |
| <i>Smco3</i>      |                 | <i>Smco3</i>      | <i>Smco3</i>      |                              |                |

Suppl. Table 1  
(191/234)

|                 | ChIP-Seq hits  |                 |                | Unique hits with interactors |              |
|-----------------|----------------|-----------------|----------------|------------------------------|--------------|
|                 | unstimulated   | Ac              | LPS            | Ac                           | LPS          |
| <i>Smcp</i>     |                | <i>Smcp</i>     |                |                              |              |
| <i>Smcr8</i>    | <i>Smcr8</i>   | <i>Smcr8</i>    | <i>Smcr8</i>   |                              |              |
| <i>Smdt1</i>    |                |                 | <i>Smdt1</i>   |                              |              |
| <i>Smg1</i>     | <i>Smg1</i>    |                 |                |                              |              |
| <i>Smg5</i>     |                | <i>Smg5</i>     | <i>Smg5</i>    |                              |              |
| <i>Smg6</i>     | <i>Smg6</i>    |                 |                |                              |              |
| <i>Smg7</i>     |                | <i>Smg7</i>     | <i>Smg7</i>    |                              |              |
| <i>Smgc</i>     |                | <i>Smgc</i>     |                |                              |              |
| <i>Smim10l1</i> |                | <i>Smim10l1</i> |                | <i>Smim10l1</i>              |              |
| <i>Smim11</i>   |                |                 | <i>Smim11</i>  |                              |              |
| <i>Smim12</i>   |                |                 | <i>Smim12</i>  |                              |              |
| <i>Smim13</i>   | <i>Smim13</i>  |                 |                |                              |              |
| <i>Smim14</i>   |                |                 | <i>Smim14</i>  |                              |              |
| <i>Smim15</i>   | <i>Smim15</i>  | <i>Smim15</i>   | <i>Smim15</i>  |                              |              |
| <i>Smim18</i>   |                | <i>Smim18</i>   |                |                              |              |
| <i>Smim19</i>   | <i>Smim19</i>  |                 |                |                              |              |
| <i>Smim5</i>    |                |                 | <i>Smim5</i>   |                              |              |
| <i>Smim6</i>    |                |                 | <i>Smim6</i>   |                              |              |
| <i>Smim7</i>    |                |                 | <i>Smim7</i>   |                              |              |
| <i>Smkr-ps</i>  |                |                 | <i>Smkr-ps</i> |                              |              |
| <i>Smn1</i>     |                | <i>Smn1</i>     |                | <i>Smn1</i>                  |              |
| <i>Smndc1</i>   | <i>Smndc1</i>  |                 |                |                              |              |
| <i>Smoc1</i>    |                |                 | <i>Smoc1</i>   |                              |              |
| <i>Smok2a</i>   |                | <i>Smok2a</i>   | <i>Smok2a</i>  |                              |              |
| <i>Smok3a</i>   |                | <i>Smok3a</i>   |                |                              |              |
| <i>Smox</i>     | <i>Smox</i>    |                 |                |                              |              |
| <i>Smpd1</i>    |                |                 | <i>Smpd1</i>   |                              |              |
| <i>Smpd4</i>    |                | <i>Smpd4</i>    |                | <i>Smpd4</i>                 |              |
| <i>Smpdl3b</i>  |                | <i>Smpdl3b</i>  | <i>Smpdl3b</i> |                              |              |
| <i>Smpx</i>     |                |                 | <i>Smpx</i>    |                              |              |
| <i>Smr2</i>     |                |                 | <i>Smr2</i>    |                              |              |
| <i>Smtnl2</i>   |                | <i>Smtnl2</i>   |                | <i>Smtnl2</i>                |              |
| <i>Smurf1</i>   | <i>Smurf1</i>  |                 |                |                              |              |
| <i>Smurf2</i>   |                | <i>Smurf2</i>   | <i>Smurf2</i>  |                              |              |
| <i>Smyd2</i>    |                | <i>Smyd2</i>    | <i>Smyd2</i>   |                              |              |
| <i>Smyd3</i>    | <i>Smyd3</i>   |                 | <i>Smyd3</i>   |                              |              |
| <i>Smyd4</i>    | <i>Smyd4</i>   |                 |                |                              |              |
| <i>Snai1</i>    |                |                 | <i>Snai1</i>   |                              | <i>Snai1</i> |
| <i>Snap23</i>   |                | <i>Snap23</i>   |                |                              |              |
| <i>Snap47</i>   |                | <i>Snap47</i>   |                |                              |              |
| <i>Snopc1</i>   | <i>Snopc1</i>  |                 | <i>Snopc1</i>  |                              |              |
| <i>Snopc5</i>   | <i>Snopc5</i>  | <i>Snopc5</i>   |                |                              |              |
| <i>Snopin</i>   |                | <i>Snopin</i>   | <i>Snopin</i>  |                              |              |
| <i>Snciaip</i>  | <i>Snciaip</i> |                 | <i>Snciaip</i> |                              |              |
| <i>Sncb</i>     | <i>Sncb</i>    |                 |                |                              |              |
| <i>Snd1</i>     |                | <i>Snd1</i>     | <i>Snd1</i>    |                              |              |
| <i>Sned1</i>    |                |                 | <i>Sned1</i>   |                              |              |
| <i>Snf8</i>     | <i>Snf8</i>    |                 | <i>Snf8</i>    |                              |              |
| <i>Snhg1</i>    | <i>Snhg1</i>   | <i>Snhg1</i>    | <i>Snhg1</i>   |                              |              |

Suppl. Table 1  
(192/234)

|                 | CHIP-Seq hits   |                 |                 | Unique hits with interactors |              |
|-----------------|-----------------|-----------------|-----------------|------------------------------|--------------|
|                 | unstimulated    | Ac              | LPS             | Ac                           | LPS          |
| <i>Snhg11</i>   |                 | <i>Snhg11</i>   |                 | <i>Snhg11</i>                |              |
| <i>Snhg5</i>    |                 | <i>Snhg5</i>    |                 |                              |              |
| <i>Snhg7</i>    |                 |                 | <i>Snhg7</i>    |                              |              |
| <i>Snhg8</i>    |                 |                 | <i>Snhg8</i>    |                              |              |
| <i>Snip1</i>    |                 |                 | <i>Snip1</i>    |                              | <i>Snip1</i> |
| <i>Snora15</i>  |                 |                 | <i>Snora15</i>  |                              |              |
| <i>Snora17</i>  |                 |                 | <i>Snora17</i>  |                              |              |
| <i>Snora19</i>  | <i>Snora19</i>  | <i>Snora19</i>  | <i>Snora19</i>  |                              |              |
| <i>Snora20</i>  | <i>Snora20</i>  |                 | <i>Snora20</i>  |                              |              |
| <i>Snora23</i>  |                 | <i>Snora23</i>  |                 |                              |              |
| <i>Snora24</i>  |                 |                 | <i>Snora24</i>  |                              |              |
| <i>Snora28</i>  | <i>Snora28</i>  |                 |                 |                              |              |
| <i>Snora2b</i>  |                 |                 | <i>Snora2b</i>  |                              |              |
| <i>Snora3</i>   |                 | <i>Snora3</i>   |                 |                              |              |
| <i>Snora30</i>  |                 | <i>Snora30</i>  | <i>Snora30</i>  |                              |              |
| <i>Snora31</i>  | <i>Snora31</i>  | <i>Snora31</i>  | <i>Snora31</i>  |                              |              |
| <i>Snora33</i>  | <i>Snora33</i>  | <i>Snora33</i>  | <i>Snora33</i>  |                              |              |
| <i>Snora35</i>  |                 | <i>Snora35</i>  |                 |                              |              |
| <i>Snora36b</i> |                 |                 | <i>Snora36b</i> |                              |              |
| <i>Snora41</i>  |                 |                 | <i>Snora41</i>  |                              |              |
| <i>Snora43</i>  |                 |                 | <i>Snora43</i>  |                              |              |
| <i>Snora52</i>  | <i>Snora52</i>  |                 |                 |                              |              |
| <i>Snora5c</i>  | <i>Snora5c</i>  |                 |                 |                              |              |
| <i>Snora68</i>  |                 | <i>Snora68</i>  |                 |                              |              |
| <i>Snora69</i>  |                 | <i>Snora69</i>  |                 |                              |              |
| <i>Snora75</i>  | <i>Snora75</i>  |                 |                 |                              |              |
| <i>Snora81</i>  |                 | <i>Snora81</i>  | <i>Snora81</i>  |                              |              |
| <i>Snord100</i> | <i>Snord100</i> | <i>Snord100</i> | <i>Snord100</i> |                              |              |
| <i>Snord104</i> |                 |                 | <i>Snord104</i> |                              |              |
| <i>Snord11</i>  |                 | <i>Snord11</i>  |                 |                              |              |
| <i>Snord118</i> | <i>Snord118</i> |                 | <i>Snord118</i> |                              |              |
| <i>Snord123</i> |                 |                 | <i>Snord123</i> |                              |              |
| <i>Snord14c</i> |                 |                 | <i>Snord14c</i> |                              |              |
| <i>Snord14d</i> |                 |                 | <i>Snord14d</i> |                              |              |
| <i>Snord15a</i> | <i>Snord15a</i> |                 |                 |                              |              |
| <i>Snord15b</i> | <i>Snord15b</i> |                 |                 |                              |              |
| <i>Snord16a</i> | <i>Snord16a</i> | <i>Snord16a</i> | <i>Snord16a</i> |                              |              |
| <i>Snord17</i>  | <i>Snord17</i>  |                 |                 |                              |              |
| <i>Snord19</i>  | <i>Snord19</i>  | <i>Snord19</i>  |                 |                              |              |
| <i>Snord2</i>   | <i>Snord2</i>   | <i>Snord2</i>   | <i>Snord2</i>   |                              |              |
| <i>Snord22</i>  | <i>Snord22</i>  | <i>Snord22</i>  | <i>Snord22</i>  |                              |              |
| <i>Snord37</i>  | <i>Snord37</i>  | <i>Snord37</i>  | <i>Snord37</i>  |                              |              |
| <i>Snord38a</i> | <i>Snord38a</i> |                 | <i>Snord38a</i> |                              |              |
| <i>Snord42a</i> |                 |                 | <i>Snord42a</i> |                              |              |
| <i>Snord42b</i> | <i>Snord42b</i> | <i>Snord42b</i> | <i>Snord42b</i> |                              |              |
| <i>Snord43</i>  |                 |                 | <i>Snord43</i>  |                              |              |
| <i>Snord47</i>  |                 | <i>Snord47</i>  |                 |                              |              |
| <i>Snord49a</i> |                 |                 | <i>Snord49a</i> |                              |              |
| <i>Snord49b</i> |                 |                 | <i>Snord49b</i> |                              |              |



Suppl. Table 1  
(193/234)

|                 | CHIP-Seq hits   |                 |                 | Unique hits with interactors |     |
|-----------------|-----------------|-----------------|-----------------|------------------------------|-----|
|                 | unstimulated    | Ac              | LPS             | Ac                           | LPS |
| <i>Snord4a</i>  |                 |                 | <i>Snord4a</i>  |                              |     |
| <i>Snord55</i>  | <i>Snord55</i>  |                 | <i>Snord55</i>  |                              |     |
| <i>Snord58b</i> |                 |                 | <i>Snord58b</i> |                              |     |
| <i>Snord64</i>  |                 | <i>Snord64</i>  |                 |                              |     |
| <i>Snord65</i>  |                 |                 | <i>Snord65</i>  |                              |     |
| <i>Snord68</i>  | <i>Snord68</i>  |                 | <i>Snord68</i>  |                              |     |
| <i>Snord69</i>  |                 | <i>Snord69</i>  |                 |                              |     |
| <i>Snord7</i>   | <i>Snord7</i>   |                 | <i>Snord7</i>   |                              |     |
| <i>Snord70</i>  |                 | <i>Snord70</i>  |                 |                              |     |
| <i>Snord72</i>  |                 | <i>Snord72</i>  | <i>Snord72</i>  |                              |     |
| <i>Snord73a</i> | <i>Snord73a</i> | <i>Snord73a</i> | <i>Snord73a</i> |                              |     |
| <i>Snord82</i>  |                 | <i>Snord82</i>  | <i>Snord82</i>  |                              |     |
| <i>Snord85</i>  |                 | <i>Snord85</i>  | <i>Snord85</i>  |                              |     |
| <i>Snord89</i>  |                 |                 | <i>Snord89</i>  |                              |     |
| <i>Snord91a</i> |                 |                 | <i>Snord91a</i> |                              |     |
| <i>Snord95</i>  |                 |                 | <i>Snord95</i>  |                              |     |
| <i>Snord96a</i> |                 |                 | <i>Snord96a</i> |                              |     |
| <i>Snrk</i>     |                 | <i>Snrk</i>     |                 |                              |     |
| <i>Snrnp27</i>  | <i>Snrnp27</i>  |                 |                 |                              |     |
| <i>Snrnp40</i>  |                 | <i>Snrnp40</i>  |                 |                              |     |
| <i>Snrnp70</i>  | <i>Snrnp70</i>  | <i>Snrnp70</i>  | <i>Snrnp70</i>  |                              |     |
| <i>Snrpa1</i>   |                 | <i>Snrpa1</i>   |                 |                              |     |
| <i>Snrpb2</i>   | <i>Snrpb2</i>   |                 |                 |                              |     |
| <i>Snrpd1</i>   | <i>Snrpd1</i>   | <i>Snrpd1</i>   | <i>Snrpd1</i>   |                              |     |
| <i>Snrpe</i>    |                 | <i>Snrpe</i>    |                 |                              |     |
| <i>Snrpf</i>    |                 | <i>Snrpf</i>    |                 |                              |     |
| <i>Sntb1</i>    |                 |                 | <i>Sntb1</i>    |                              |     |
| <i>Sntb2</i>    |                 | <i>Sntb2</i>    | <i>Sntb2</i>    |                              |     |
| <i>Sntn</i>     |                 | <i>Sntn</i>     | <i>Sntn</i>     |                              |     |
| <i>Snupn</i>    |                 |                 | <i>Snupn</i>    |                              |     |
| <i>Snurf</i>    | <i>Snurf</i>    | <i>Snurf</i>    | <i>Snurf</i>    |                              |     |
| <i>Snx1</i>     | <i>Snx1</i>     | <i>Snx1</i>     | <i>Snx1</i>     |                              |     |
| <i>Snx10</i>    |                 |                 | <i>Snx10</i>    |                              |     |
| <i>Snx12</i>    |                 |                 | <i>Snx12</i>    |                              |     |
| <i>Snx13</i>    | <i>Snx13</i>    |                 | <i>Snx13</i>    |                              |     |
| <i>Snx16</i>    |                 | <i>Snx16</i>    |                 | <i>Snx16</i>                 |     |
| <i>Snx17</i>    | <i>Snx17</i>    |                 |                 |                              |     |
| <i>Snx18</i>    |                 | <i>Snx18</i>    |                 |                              |     |
| <i>Snx19</i>    | <i>Snx19</i>    |                 | <i>Snx19</i>    |                              |     |
| <i>Snx2</i>     | <i>Snx2</i>     | <i>Snx2</i>     | <i>Snx2</i>     |                              |     |
| <i>Snx20</i>    |                 |                 | <i>Snx20</i>    |                              |     |
| <i>Snx22</i>    |                 | <i>Snx22</i>    |                 |                              |     |
| <i>Snx24</i>    | <i>Snx24</i>    |                 | <i>Snx24</i>    |                              |     |
| <i>Snx29</i>    | <i>Snx29</i>    |                 |                 |                              |     |
| <i>Snx31</i>    |                 | <i>Snx31</i>    |                 |                              |     |
| <i>Snx32</i>    |                 | <i>Snx32</i>    | <i>Snx32</i>    |                              |     |
| <i>Snx33</i>    | <i>Snx33</i>    |                 | <i>Snx33</i>    |                              |     |
| <i>Snx6</i>     | <i>Snx6</i>     | <i>Snx6</i>     | <i>Snx6</i>     |                              |     |
| <i>Snx7</i>     |                 |                 | <i>Snx7</i>     |                              |     |

Suppl. Table 1  
(194/234)

|                | CHIP-Seq hits  |                |                | Unique hits with interactors |              |
|----------------|----------------|----------------|----------------|------------------------------|--------------|
|                | unstimulated   | Ac             | LPS            | Ac                           | LPS          |
| <i>Snx8</i>    |                | <i>Snx8</i>    |                |                              |              |
| <i>Soat1</i>   |                | <i>Soat1</i>   | <i>Soat1</i>   |                              |              |
| <i>Soat2</i>   | <i>Soat2</i>   |                | <i>Soat2</i>   |                              |              |
| <i>Sobp</i>    |                | <i>Sobp</i>    | <i>Sobp</i>    |                              |              |
| <i>Socs1</i>   | <i>Socs1</i>   |                |                |                              |              |
| <i>Socs2</i>   |                |                | <i>Socs2</i>   |                              | <i>Socs2</i> |
| <i>Socs3</i>   |                | <i>Socs3</i>   | <i>Socs3</i>   |                              |              |
| <i>Socs4</i>   |                |                | <i>Socs4</i>   |                              |              |
| <i>Socs5</i>   |                | <i>Socs5</i>   |                |                              |              |
| <i>Socs7</i>   |                |                | <i>Socs7</i>   |                              |              |
| <i>Sod2</i>    | <i>Sod2</i>    |                |                |                              |              |
| <i>Son</i>     |                |                | <i>Son</i>     |                              | <i>Son</i>   |
| <i>Sorbs2</i>  |                | <i>Sorbs2</i>  |                |                              |              |
| <i>Sorbs3</i>  |                |                | <i>Sorbs3</i>  |                              |              |
| <i>Sorcs3</i>  |                |                | <i>Sorcs3</i>  |                              |              |
| <i>Sord</i>    | <i>Sord</i>    | <i>Sord</i>    | <i>Sord</i>    |                              |              |
| <i>Sos2</i>    | <i>Sos2</i>    |                | <i>Sos2</i>    |                              |              |
| <i>Sost</i>    |                | <i>Sost</i>    | <i>Sost</i>    |                              |              |
| <i>Sostdc1</i> | <i>Sostdc1</i> |                |                |                              |              |
| <i>Sowaha</i>  |                | <i>Sowaha</i>  |                |                              |              |
| <i>Sowahc</i>  |                |                | <i>Sowahc</i>  |                              |              |
| <i>Sowahd</i>  | <i>Sowahd</i>  |                |                |                              |              |
| <i>Sox10</i>   |                | <i>Sox10</i>   | <i>Sox10</i>   |                              |              |
| <i>Sox12</i>   |                |                | <i>Sox12</i>   |                              |              |
| <i>Sox13</i>   |                | <i>Sox13</i>   |                |                              |              |
| <i>Sox15</i>   |                |                | <i>Sox15</i>   |                              | <i>Sox15</i> |
| <i>Sox17</i>   |                | <i>Sox17</i>   |                |                              |              |
| <i>Sox18</i>   | <i>Sox18</i>   |                |                |                              |              |
| <i>Sox3</i>    |                | <i>Sox3</i>    |                | <i>Sox3</i>                  |              |
| <i>Sp1</i>     |                | <i>Sp1</i>     |                | <i>Sp1</i>                   |              |
| <i>Sp110</i>   | <i>Sp110</i>   |                |                |                              |              |
| <i>Sp140</i>   | <i>Sp140</i>   |                |                |                              |              |
| <i>Sp2</i>     | <i>Sp2</i>     | <i>Sp2</i>     |                |                              |              |
| <i>Sp3</i>     |                |                | <i>Sp3</i>     |                              | <i>Sp3</i>   |
| <i>Sp7</i>     |                | <i>Sp7</i>     |                | <i>Sp7</i>                   |              |
| <i>Sp9</i>     |                | <i>Sp9</i>     |                |                              |              |
| <i>Spa17</i>   |                | <i>Spa17</i>   |                |                              |              |
| <i>Spaca3</i>  |                | <i>Spaca3</i>  | <i>Spaca3</i>  |                              |              |
| <i>Spaca4</i>  |                |                | <i>Spaca4</i>  |                              |              |
| <i>Spag1</i>   |                | <i>Spag1</i>   |                |                              |              |
| <i>Spag11a</i> |                | <i>Spag11a</i> |                |                              |              |
| <i>Spag16</i>  |                | <i>Spag16</i>  |                |                              |              |
| <i>Spag17</i>  |                | <i>Spag17</i>  |                |                              |              |
| <i>Spag5</i>   |                |                | <i>Spag5</i>   |                              |              |
| <i>Spag9</i>   |                |                | <i>Spag9</i>   |                              | <i>Spag9</i> |
| <i>Spanxn4</i> | <i>Spanxn4</i> |                |                |                              |              |
| <i>Sparcl1</i> |                |                | <i>Sparcl1</i> |                              |              |
| <i>Spast</i>   |                |                | <i>Spast</i>   |                              | <i>Spast</i> |
| <i>Spata1</i>  |                |                | <i>Spata1</i>  |                              |              |

Suppl. Table 1  
(195/234)

|                   | CHIP-Seq hits |            |           | Unique hits with interactors |     |
|-------------------|---------------|------------|-----------|------------------------------|-----|
|                   | unstimulated  | Ac         | LPS       | Ac                           | LPS |
| <i>Spata13</i>    |               | Spata13    |           | Spata13                      |     |
| <i>Spata16</i>    |               |            | Spata16   |                              |     |
| <i>Spata17</i>    |               |            | Spata17   |                              |     |
| <i>Spata22</i>    |               |            | Spata22   |                              |     |
| <i>Spata3</i>     |               |            | Spata3    |                              |     |
| <i>Spata31d1a</i> |               | Spata31d1a |           |                              |     |
| <i>Spata31d1c</i> |               | Spata31d1c |           |                              |     |
| <i>Spata32</i>    |               | Spata32    | Spata32   |                              |     |
| <i>Spata33</i>    |               | Spata33    |           |                              |     |
| <i>Spata5</i>     |               |            | Spata5    |                              |     |
| <i>Spata6</i>     |               |            | Spata6    |                              |     |
| <i>Spata7</i>     |               | Spata7     |           |                              |     |
| <i>Spata9</i>     |               | Spata9     |           |                              |     |
| <i>Spatc1</i>     |               |            | Spatc1    |                              |     |
| <i>Spatc1l</i>    |               | Spatc1l    |           |                              |     |
| <i>Spats1</i>     |               |            | Spats1    |                              |     |
| <i>Spc25</i>      | Spc25         |            |           |                              |     |
| <i>Spcs1</i>      |               | Spcs1      |           |                              |     |
| <i>Spcs2</i>      |               |            | Spcs2     |                              |     |
| <i>Spcs3</i>      |               |            | Spcs3     |                              |     |
| <i>Spdef</i>      |               | Spdef      |           |                              |     |
| <i>Spdl1</i>      |               | Spdl1      |           |                              |     |
| <i>Spdya</i>      | Spdya         | Spdya      |           |                              |     |
| <i>Specc1</i>     |               | Specc1     | Specc1    |                              |     |
| <i>Speer2</i>     | Speer2        |            |           |                              |     |
| <i>Speer3</i>     | Speer3        |            |           |                              |     |
| <i>Speer4c</i>    |               |            | Speer4c   |                              |     |
| <i>Speer4cos</i>  | Speer4cos     |            | Speer4cos |                              |     |
| <i>Speer4d</i>    | Speer4d       | Speer4d    | Speer4d   |                              |     |
| <i>Speer4e</i>    |               | Speer4e    | Speer4e   |                              |     |
| <i>Speer4f</i>    |               | Speer4f    |           |                              |     |
| <i>Speer9-ps1</i> | Speer9-ps1    | Speer9-ps1 |           |                              |     |
| <i>Spf1</i>       |               | Spf1       |           |                              |     |
| <i>Speg</i>       | Speg          | Speg       |           |                              |     |
| <i>Spert</i>      |               | Spert      |           |                              |     |
| <i>Spesp1</i>     |               |            | Spesp1    |                              |     |
| <i>Spg21</i>      |               | Spg21      | Spg21     |                              |     |
| <i>Spg7</i>       | Spg7          |            | Spg7      |                              |     |
| <i>Sphk2</i>      |               | Sphk2      |           |                              |     |
| <i>Spic</i>       |               |            | Spic      |                              |     |
| <i>Spidr</i>      |               | Spidr      | Spidr     |                              |     |
| <i>Spin1</i>      |               | Spin1      |           |                              |     |
| <i>Spin4</i>      |               | Spin4      |           |                              |     |
| <i>Spink13</i>    | Spink13       | Spink13    |           |                              |     |
| <i>Spink14</i>    |               | Spink14    |           |                              |     |
| <i>Spink2</i>     |               |            | Spink2    |                              |     |
| <i>Spink5</i>     | Spink5        |            |           |                              |     |
| <i>Spink7</i>     |               |            | Spink7    |                              |     |
| <i>Spink8</i>     |               | Spink8     |           |                              |     |

Suppl. Table 1  
(196/234)

|                | CHIP-Seq hits  |                |                | Unique hits with interactors |               |
|----------------|----------------|----------------|----------------|------------------------------|---------------|
|                | unstimulated   | Ac             | LPS            | Ac                           | LPS           |
| <i>Spink1</i>  |                | <i>Spink1</i>  | <i>Spink1</i>  |                              |               |
| <i>Spint2</i>  | <i>Spint2</i>  |                |                |                              |               |
| <i>Spn</i>     |                |                | <i>Spn</i>     |                              | <i>Spn</i>    |
| <i>Spn-ps</i>  |                |                | <i>Spn-ps</i>  |                              |               |
| <i>Spns1</i>   |                | <i>Spns1</i>   |                |                              |               |
| <i>Spock1</i>  |                | <i>Spock1</i>  |                |                              |               |
| <i>Spon1</i>   | <i>Spon1</i>   | <i>Spon1</i>   |                |                              |               |
| <i>Spop</i>    |                |                | <i>Spop</i>    |                              |               |
| <i>Spp1</i>    |                | <i>Spp1</i>    | <i>Spp1</i>    |                              |               |
| <i>Spp2</i>    |                |                | <i>Spp2</i>    |                              |               |
| <i>Sppl2a</i>  | <i>Sppl2a</i>  | <i>Sppl2a</i>  | <i>Sppl2a</i>  |                              |               |
| <i>Sppl3</i>   |                | <i>Sppl3</i>   | <i>Sppl3</i>   |                              |               |
| <i>Spred3</i>  |                | <i>Spred3</i>  |                |                              |               |
| <i>Sprn</i>    |                | <i>Sprn</i>    |                | <i>Sprn</i>                  |               |
| <i>Sprr1b</i>  |                | <i>Sprr1b</i>  |                |                              |               |
| <i>Sprr2a1</i> | <i>Sprr2a1</i> | <i>Sprr2a1</i> | <i>Sprr2a1</i> |                              |               |
| <i>Sprr2a2</i> | <i>Sprr2a2</i> | <i>Sprr2a2</i> | <i>Sprr2a2</i> |                              |               |
| <i>Sprr2e</i>  |                | <i>Sprr2e</i>  | <i>Sprr2e</i>  |                              |               |
| <i>Sprr2i</i>  | <i>Sprr2i</i>  |                |                |                              |               |
| <i>Sprr2k</i>  |                | <i>Sprr2k</i>  |                |                              |               |
| <i>Sprr4</i>   |                | <i>Sprr4</i>   | <i>Sprr4</i>   |                              |               |
| <i>Spry1</i>   |                | <i>Spry1</i>   |                | <i>Spry1</i>                 |               |
| <i>Spry2</i>   | <i>Spry2</i>   |                |                |                              |               |
| <i>Spry3</i>   | <i>Spry3</i>   |                |                |                              |               |
| <i>Spry4</i>   |                | <i>Spry4</i>   |                | <i>Spry4</i>                 |               |
| <i>Spryd3</i>  |                |                | <i>Spryd3</i>  |                              |               |
| <i>Spryd4</i>  |                | <i>Spryd4</i>  |                |                              |               |
| <i>Spryd7</i>  |                | <i>Spryd7</i>  | <i>Spryd7</i>  |                              |               |
| <i>Spsb2</i>   |                | <i>Spsb2</i>   |                |                              |               |
| <i>Spsb4</i>   |                |                | <i>Spsb4</i>   |                              |               |
| <i>Spta1</i>   | <i>Spta1</i>   | <i>Spta1</i>   |                |                              |               |
| <i>Sptbn1</i>  |                | <i>Sptbn1</i>  | <i>Sptbn1</i>  |                              |               |
| <i>Sptlc1</i>  | <i>Sptlc1</i>  |                |                |                              |               |
| <i>Sptssb</i>  |                | <i>Sptssb</i>  | <i>Sptssb</i>  |                              |               |
| <i>Spz1</i>    |                |                | <i>Spz1</i>    |                              |               |
| <i>Sqle</i>    |                | <i>Sqle</i>    |                |                              |               |
| <i>Srbd1</i>   |                |                | <i>Srbd1</i>   |                              |               |
| <i>Srcap</i>   |                | <i>Srcap</i>   | <i>Srcap</i>   |                              |               |
| <i>Srd5a1</i>  |                | <i>Srd5a1</i>  |                |                              |               |
| <i>Srd5a3</i>  |                |                | <i>Srd5a3</i>  |                              |               |
| <i>Srebf2</i>  |                |                | <i>Srebf2</i>  |                              | <i>Srebf2</i> |
| <i>Srek1</i>   |                | <i>Srek1</i>   |                |                              |               |
| <i>Srgap1</i>  | <i>Srgap1</i>  |                |                |                              |               |
| <i>Sri</i>     |                | <i>Sri</i>     |                | <i>Sri</i>                   |               |
| <i>Srl</i>     | <i>Srl</i>     |                | <i>Srl</i>     |                              |               |
| <i>Srm</i>     |                |                | <i>Srm</i>     |                              |               |
| <i>Srp14</i>   |                | <i>Srp14</i>   | <i>Srp14</i>   |                              |               |
| <i>Srp54a</i>  |                | <i>Srp54a</i>  | <i>Srp54a</i>  |                              |               |
| <i>Srp54b</i>  | <i>Srp54b</i>  | <i>Srp54b</i>  | <i>Srp54b</i>  |                              |               |

Suppl. Table 1  
(197/234)

|                   | ChIP-Seq hits |                   |                   | Unique hits with interactors |                   |
|-------------------|---------------|-------------------|-------------------|------------------------------|-------------------|
|                   | unstimulated  | Ac                | LPS               | Ac                           | LPS               |
| <i>Srp54c</i>     |               | <i>Srp54c</i>     | <i>Srp54c</i>     |                              |                   |
| <i>Srp68</i>      | <i>Srp68</i>  |                   |                   |                              |                   |
| <i>Srp72</i>      |               |                   | <i>Srp72</i>      |                              | <i>Srp72</i>      |
| <i>Srpk1</i>      |               |                   | <i>Srpk1</i>      |                              |                   |
| <i>Srr</i>        |               |                   | <i>Srr</i>        |                              |                   |
| <i>Srrm3</i>      |               | <i>Srrm3</i>      | <i>Srrm3</i>      |                              |                   |
| <i>Srrt</i>       |               | <i>Srrt</i>       |                   |                              |                   |
| <i>Srsf1</i>      |               | <i>Srsf1</i>      |                   | <i>Srsf1</i>                 |                   |
| <i>Srsf11</i>     |               |                   | <i>Srsf11</i>     |                              |                   |
| <i>Srsf2</i>      |               |                   | <i>Srsf2</i>      |                              |                   |
| <i>Srsf3</i>      |               | <i>Srsf3</i>      |                   |                              |                   |
| <i>Srsf4</i>      |               |                   | <i>Srsf4</i>      |                              |                   |
| <i>Srsf5</i>      | <i>Srsf5</i>  |                   | <i>Srsf5</i>      |                              |                   |
| <i>Srsf9</i>      | <i>Srsf9</i>  |                   |                   |                              |                   |
| <i>Srxn1</i>      | <i>Srxn1</i>  |                   |                   |                              |                   |
| <i>Ss18</i>       |               | <i>Ss18</i>       |                   |                              |                   |
| <i>Ssb</i>        |               |                   | <i>Ssb</i>        |                              |                   |
| <i>Ssbp1</i>      | <i>Ssbp1</i>  | <i>Ssbp1</i>      |                   |                              |                   |
| <i>Ssbp2</i>      | <i>Ssbp2</i>  |                   |                   |                              |                   |
| <i>Ssbp3</i>      |               |                   | <i>Ssbp3</i>      |                              |                   |
| <i>Ssc5d</i>      |               | <i>Ssc5d</i>      |                   |                              |                   |
| <i>Ssh1</i>       | <i>Ssh1</i>   |                   | <i>Ssh1</i>       |                              |                   |
| <i>Ssh2</i>       | <i>Ssh2</i>   |                   | <i>Ssh2</i>       |                              |                   |
| <i>Ssmem1</i>     |               | <i>Ssmem1</i>     |                   |                              |                   |
| <i>Sspn</i>       | <i>Sspn</i>   |                   |                   |                              |                   |
| <i>Ssr1</i>       | <i>Ssr1</i>   | <i>Ssr1</i>       | <i>Ssr1</i>       |                              |                   |
| <i>Ssr3</i>       |               | <i>Ssr3</i>       |                   |                              |                   |
| <i>Ssrp1</i>      |               | <i>Ssrp1</i>      |                   | <i>Ssrp1</i>                 |                   |
| <i>Sst</i>        |               | <i>Sst</i>        |                   |                              |                   |
| <i>Sstr1</i>      |               | <i>Sstr1</i>      |                   | <i>Sstr1</i>                 |                   |
| <i>Sstr2</i>      |               | <i>Sstr2</i>      |                   |                              |                   |
| <i>Sstr4</i>      |               | <i>Sstr4</i>      |                   |                              |                   |
| <i>Ssty1</i>      |               |                   | <i>Ssty1</i>      |                              |                   |
| <i>Ssty2</i>      |               |                   | <i>Ssty2</i>      |                              |                   |
| <i>Ssu2</i>       | <i>Ssu2</i>   | <i>Ssu2</i>       |                   |                              |                   |
| <i>Ssx2ip</i>     |               |                   | <i>Ssx2ip</i>     |                              |                   |
| <i>Ssxb1</i>      |               | <i>Ssxb1</i>      | <i>Ssxb1</i>      |                              |                   |
| <i>Ssxb10</i>     |               |                   | <i>Ssxb10</i>     |                              |                   |
| <i>Ssxb5</i>      |               | <i>Ssxb5</i>      |                   |                              |                   |
| <i>Ssxb8</i>      |               | <i>Ssxb8</i>      |                   |                              |                   |
| <i>St18</i>       | <i>St18</i>   |                   | <i>St18</i>       |                              |                   |
| <i>St6galnac1</i> |               | <i>St6galnac1</i> | <i>St6galnac1</i> |                              |                   |
| <i>St6galnac2</i> |               |                   | <i>St6galnac2</i> |                              |                   |
| <i>St6galnac5</i> |               |                   | <i>St6galnac5</i> |                              | <i>St6galnac5</i> |
| <i>St6galnac6</i> |               | <i>St6galnac6</i> | <i>St6galnac6</i> |                              |                   |
| <i>St7</i>        | <i>St7</i>    |                   |                   |                              |                   |
| <i>St7l</i>       | <i>St7l</i>   |                   |                   |                              |                   |
| <i>St8sia1</i>    |               | <i>St8sia1</i>    |                   |                              |                   |
| <i>St8sia4</i>    |               | <i>St8sia4</i>    | <i>St8sia4</i>    |                              |                   |

Suppl. Table 1  
(198/234)

|                 | CHIP-Seq hits  |                 |                | Unique hits with interactors |                |
|-----------------|----------------|-----------------|----------------|------------------------------|----------------|
|                 | unstimulated   | Ac              | LPS            | Ac                           | LPS            |
| <i>St8sia5</i>  |                | <i>St8sia5</i>  |                |                              |                |
| <i>Stac</i>     | <i>Stac</i>    |                 |                |                              |                |
| <i>Stag1</i>    |                | <i>Stag1</i>    |                |                              |                |
| <i>Stag3</i>    |                | <i>Stag3</i>    | <i>Stag3</i>   |                              |                |
| <i>Stam</i>     | <i>Stam</i>    | <i>Stam</i>     | <i>Stam</i>    |                              |                |
| <i>Stam2</i>    | <i>Stam2</i>   |                 |                |                              |                |
| <i>Stamos</i>   |                | <i>Stamos</i>   | <i>Stamos</i>  |                              |                |
| <i>Stap2</i>    | <i>Stap2</i>   | <i>Stap2</i>    | <i>Stap2</i>   |                              |                |
| <i>Stard10</i>  |                | <i>Stard10</i>  |                |                              |                |
| <i>Stard13</i>  |                |                 | <i>Stard13</i> |                              | <i>Stard13</i> |
| <i>Stard3nl</i> |                | <i>Stard3nl</i> |                |                              |                |
| <i>Stard4</i>   |                |                 | <i>Stard4</i>  |                              |                |
| <i>Stard6</i>   | <i>Stard6</i>  |                 |                |                              |                |
| <i>Stard7</i>   |                |                 | <i>Stard7</i>  |                              | <i>Stard7</i>  |
| <i>Stard8</i>   |                | <i>Stard8</i>   |                | <i>Stard8</i>                |                |
| <i>Stat1</i>    |                |                 | <i>Stat1</i>   |                              | <i>Stat1</i>   |
| <i>Stat2</i>    |                |                 | <i>Stat2</i>   |                              | <i>Stat2</i>   |
| <i>Stat5a</i>   |                |                 | <i>Stat5a</i>  |                              |                |
| <i>Stat5b</i>   |                |                 | <i>Stat5b</i>  |                              | <i>Stat5b</i>  |
| <i>Stau2</i>    |                | <i>Stau2</i>    |                |                              |                |
| <i>Stbd1</i>    |                |                 | <i>Stbd1</i>   |                              |                |
| <i>Steap2</i>   | <i>Steap2</i>  |                 |                |                              |                |
| <i>Stfa2</i>    |                | <i>Stfa2</i>    |                |                              |                |
| <i>Stfa3</i>    |                | <i>Stfa3</i>    | <i>Stfa3</i>   |                              |                |
| <i>Stil</i>     |                |                 | <i>Stil</i>    |                              |                |
| <i>Stim1</i>    | <i>Stim1</i>   |                 |                |                              |                |
| <i>Stip1</i>    |                |                 | <i>Stip1</i>   |                              |                |
| <i>Stk10</i>    |                |                 | <i>Stk10</i>   |                              | <i>Stk10</i>   |
| <i>Stk11</i>    |                |                 | <i>Stk11</i>   |                              |                |
| <i>Stk11ip</i>  | <i>Stk11ip</i> |                 |                |                              |                |
| <i>Stk16</i>    |                | <i>Stk16</i>    | <i>Stk16</i>   |                              |                |
| <i>Stk19</i>    | <i>Stk19</i>   |                 | <i>Stk19</i>   |                              |                |
| <i>Stk24</i>    | <i>Stk24</i>   | <i>Stk24</i>    |                |                              |                |
| <i>Stk31</i>    |                | <i>Stk31</i>    | <i>Stk31</i>   |                              |                |
| <i>Stk32a</i>   |                |                 | <i>Stk32a</i>  |                              | <i>Stk32a</i>  |
| <i>Stk32b</i>   |                |                 | <i>Stk32b</i>  |                              | <i>Stk32b</i>  |
| <i>Stk32c</i>   |                | <i>Stk32c</i>   |                |                              |                |
| <i>Stk35</i>    | <i>Stk35</i>   | <i>Stk35</i>    | <i>Stk35</i>   |                              |                |
| <i>Stk38</i>    |                |                 | <i>Stk38</i>   |                              |                |
| <i>Stk38l</i>   |                | <i>Stk38l</i>   |                |                              |                |
| <i>Stk39</i>    |                | <i>Stk39</i>    |                |                              |                |
| <i>Stk4</i>     | <i>Stk4</i>    |                 |                |                              |                |
| <i>Stk40</i>    | <i>Stk40</i>   | <i>Stk40</i>    | <i>Stk40</i>   |                              |                |
| <i>Stk-ps2</i>  |                |                 | <i>Stk-ps2</i> |                              |                |
| <i>Stmn2</i>    |                | <i>Stmn2</i>    | <i>Stmn2</i>   |                              |                |
| <i>Stmn4</i>    |                | <i>Stmn4</i>    |                |                              |                |
| <i>Stoml1</i>   |                |                 | <i>Stoml1</i>  |                              |                |
| <i>Stoml2</i>   |                | <i>Stoml2</i>   | <i>Stoml2</i>  |                              |                |
| <i>Ston1</i>    |                |                 | <i>Ston1</i>   |                              |                |

Suppl. Table 1  
(199/234)

|                  | ChIP-Seq hits |         |         | Unique hits with interactors |         |
|------------------|---------------|---------|---------|------------------------------|---------|
|                  | unstimulated  | Ac      | LPS     | Ac                           | LPS     |
| <i>Stpg2</i>     | Stpg2         |         | Stpg2   |                              |         |
| <i>Stra8</i>     |               |         | Stra8   |                              |         |
| <i>Strc</i>      |               | Strc    |         |                              |         |
| <i>Strip2</i>    |               |         | Strip2  |                              |         |
| <i>Strn</i>      |               | Strn    | Strn    |                              |         |
| <i>Strn3</i>     |               |         | Strn3   |                              |         |
| <i>Stt3a</i>     |               | Stt3a   |         |                              |         |
| <i>Stt3b</i>     | Stt3b         |         |         |                              |         |
| <i>Stx11</i>     | Stx11         |         |         |                              |         |
| <i>Stx17</i>     |               |         | Stx17   |                              | Stx17   |
| <i>Stx18</i>     |               | Stx18   |         |                              |         |
| <i>Stx19</i>     | Stx19         |         |         |                              |         |
| <i>Stx1b</i>     |               |         | Stx1b   |                              |         |
| <i>Stx3</i>      |               | Stx3    |         |                              |         |
| <i>Stx4a</i>     | Stx4a         | Stx4a   | Stx4a   |                              |         |
| <i>Stx7</i>      |               | Stx7    |         |                              |         |
| <i>Stx8</i>      |               | Stx8    | Stx8    |                              |         |
| <i>Stxbp1</i>    |               | Stxbp1  |         | Stxbp1                       |         |
| <i>Stxbp3</i>    |               | Stxbp3  | Stxbp3  |                              |         |
| <i>Stxbp3-ps</i> | Stxbp3-ps     |         |         |                              |         |
| <i>Stxbp4</i>    |               | Stxbp4  |         | Stxbp4                       |         |
| <i>Stxbp5</i>    | Stxbp5        |         |         |                              |         |
| <i>Stxbp5l</i>   |               |         | Stxbp5l |                              | Stxbp5l |
| <i>Stxbp6</i>    |               |         | Stxbp6  |                              | Stxbp6  |
| <i>Styk1</i>     |               | Styk1   | Styk1   |                              |         |
| <i>Styx</i>      |               | Styx    |         |                              |         |
| <i>Styxl1</i>    | Styxl1        | Styxl1  | Styxl1  |                              |         |
| <i>Sub1</i>      |               |         | Sub1    |                              | Sub1    |
| <i>Suco</i>      | Suco          |         | Suco    |                              |         |
| <i>Sufu</i>      |               | Sufu    | Sufu    |                              |         |
| <i>Sugct</i>     | Sugct         |         |         |                              |         |
| <i>Sugp1</i>     |               | Sugp1   |         |                              |         |
| <i>Sugp2</i>     | Sugp2         | Sugp2   | Sugp2   |                              |         |
| <i>Sugt1</i>     | Sugt1         |         |         |                              |         |
| <i>Sult1b1</i>   |               | Sult1b1 |         |                              |         |
| <i>Sult2a1</i>   | Sult2a1       |         |         |                              |         |
| <i>Sult2a4</i>   |               |         | Sult2a4 |                              |         |
| <i>Sult2a5</i>   | Sult2a5       |         |         |                              |         |
| <i>Sult2a6</i>   |               | Sult2a6 |         |                              |         |
| <i>Sult2a8</i>   |               | Sult2a8 | Sult2a8 |                              |         |
| <i>Sult2b1</i>   |               | Sult2b1 | Sult2b1 |                              |         |
| <i>Sult3a1</i>   |               |         | Sult3a1 |                              |         |
| <i>Sult4a1</i>   |               |         | Sult4a1 |                              | Sult4a1 |
| <i>Sult5a1</i>   |               | Sult5a1 |         |                              |         |
| <i>Sumf1</i>     | Sumf1         |         |         |                              |         |
| <i>Sumo2</i>     | Sumo2         |         | Sumo2   |                              |         |
| <i>Sumo3</i>     | Sumo3         | Sumo3   | Sumo3   |                              |         |
| <i>Sun3</i>      | Sun3          | Sun3    | Sun3    |                              |         |
| <i>Supt4a</i>    |               | Supt4a  | Supt4a  |                              |         |

Suppl. Table 1  
(200/234)

|                | ChIP-Seq hits |         |         | Unique hits with interactors |       |
|----------------|---------------|---------|---------|------------------------------|-------|
|                | unstimulated  | Ac      | LPS     | Ac                           | LPS   |
| <i>Supt5</i>   |               |         | Supt5   |                              |       |
| <i>Supt7l</i>  |               | Supt7l  |         | Supt7l                       |       |
| <i>Surf1</i>   |               | Surf1   |         |                              |       |
| <i>Surf2</i>   |               |         | Surf2   |                              |       |
| <i>Susd5</i>   |               | Susd5   | Susd5   |                              |       |
| <i>Susd6</i>   | Susd6         |         |         |                              |       |
| <i>Suz12</i>   | Suz12         |         | Suz12   |                              |       |
| <i>Sval1</i>   | Sval1         |         | Sval1   |                              |       |
| <i>Sval2</i>   |               | Sval2   |         |                              |       |
| <i>Sval3</i>   | Sval3         |         |         |                              |       |
| <i>Svil</i>    | Svil          |         |         |                              |       |
| <i>Svopl</i>   |               | Svopl   | Svopl   |                              |       |
| <i>Svs3b</i>   | Svs3b         |         | Svs3b   |                              |       |
| <i>Swap70</i>  |               | Swap70  |         |                              |       |
| <i>Swi5</i>    |               | Swi5    |         |                              |       |
| <i>Swt1</i>    |               | Swt1    | Swt1    |                              |       |
| <i>Syap1</i>   |               |         | Syap1   |                              | Syap1 |
| <i>Sybu</i>    |               | Sybu    | Sybu    |                              |       |
| <i>Syce2</i>   |               | Syce2   | Syce2   |                              |       |
| <i>Sycn</i>    |               | Sycn    |         |                              |       |
| <i>Syf2</i>    |               | Syf2    |         |                              |       |
| <i>Syk</i>     |               | Syk     |         | Syk                          |       |
| <i>Sympk</i>   |               |         | Sympk   |                              |       |
| <i>Syn2</i>    |               |         | Syn2    |                              |       |
| <i>Syna</i>    |               | Syna    |         |                              |       |
| <i>Synb</i>    |               |         | Synb    |                              | Synb  |
| <i>Syncrip</i> |               | Syncrip |         |                              |       |
| <i>Syndig1</i> | Syndig1       | Syndig1 | Syndig1 |                              |       |
| <i>Syne1</i>   |               | Syne1   | Syne1   |                              |       |
| <i>Syne2</i>   | Syne2         |         |         |                              |       |
| <i>Syngr1</i>  |               |         | Syngr1  |                              |       |
| <i>Syngr2</i>  |               | Syngr2  |         |                              |       |
| <i>Syngr3</i>  | Syngr3        |         |         |                              |       |
| <i>Syngr4</i>  |               |         | Syngr4  |                              |       |
| <i>Synj1</i>   |               | Synj1   | Synj1   |                              |       |
| <i>Synj2</i>   |               |         | Synj2   |                              |       |
| <i>Synpo2</i>  |               | Synpo2  | Synpo2  |                              |       |
| <i>Synpo2l</i> | Synpo2l       |         | Synpo2l |                              |       |
| <i>Synpr</i>   | Synpr         |         |         |                              |       |
| <i>Synrg</i>   |               |         | Synrg   |                              | Synrg |
| <i>Sypl</i>    |               | Sypl    |         |                              |       |
| <i>Sys1</i>    |               |         | Sys1    |                              |       |
| <i>Syt11</i>   | Syt11         |         |         |                              |       |
| <i>Syt15</i>   |               | Syt15   |         | Syt15                        |       |
| <i>Syt16</i>   |               |         | Syt16   |                              |       |
| <i>Syt17</i>   |               |         | Syt17   |                              |       |
| <i>Syt2</i>    |               | Syt2    |         | Syt2                         |       |
| <i>Syt7</i>    |               |         | Syt7    |                              |       |
| <i>Syt8</i>    |               | Syt8    | Syt8    |                              |       |



Suppl. Table 1  
(201/234)

|                 | CHIP-Seq hits |        |         | Unique hits with interactors |        |
|-----------------|---------------|--------|---------|------------------------------|--------|
|                 | unstimulated  | Ac     | LPS     | Ac                           | LPS    |
| <i>Syt11</i>    | Syt11         | Syt11  | Syt11   |                              |        |
| <i>Syt12</i>    | Syt12         | Syt12  |         |                              |        |
| <i>Syt13</i>    |               |        | Syt13   |                              |        |
| <i>Syt15</i>    |               | Syt15  |         |                              |        |
| <i>Szrd1</i>    |               | Szrd1  | Szrd1   |                              |        |
| <i>T2</i>       |               | T2     |         |                              |        |
| <i>Taar2</i>    |               | Taar2  |         |                              |        |
| <i>Taar7d</i>   |               | Taar7d |         |                              |        |
| <i>Taar7e</i>   | Taar7e        |        | Taar7e  |                              |        |
| <i>Taar8a</i>   |               | Taar8a |         |                              |        |
| <i>Taar8c</i>   | Taar8c        |        |         |                              |        |
| <i>Taar9</i>    |               |        | Taar9   |                              |        |
| <i>Tab1</i>     |               |        | Tab1    |                              |        |
| <i>Tab3</i>     |               | Tab3   |         |                              |        |
| <i>Tac2</i>     |               | Tac2   | Tac2    |                              |        |
| <i>Tac4</i>     | Tac4          |        |         |                              |        |
| <i>Tacc1</i>    |               |        | Tacc1   |                              | Tacc1  |
| <i>Tacc2</i>    | Tacc2         |        | Tacc2   |                              |        |
| <i>Tacc3</i>    | Tacc3         |        |         |                              |        |
| <i>Taco1</i>    |               |        | Taco1   |                              |        |
| <i>Tacr3</i>    |               | Tacr3  |         |                              |        |
| <i>Tacstd2</i>  |               |        | Tacstd2 |                              |        |
| <i>Taf1</i>     |               |        | Taf1    |                              | Taf1   |
| <i>Taf13</i>    |               |        | Taf13   |                              |        |
| <i>Taf1b</i>    | Taf1b         | Taf1b  | Taf1b   |                              |        |
| <i>Taf1c</i>    |               |        | Taf1c   |                              |        |
| <i>Taf1d</i>    |               | Taf1d  |         |                              |        |
| <i>Taf2</i>     |               |        | Taf2    |                              |        |
| <i>Taf3</i>     |               |        | Taf3    |                              |        |
| <i>Taf4a</i>    |               |        | Taf4a   |                              |        |
| <i>Taf4b</i>    |               |        | Taf4b   |                              |        |
| <i>Taf5</i>     |               |        | Taf5    |                              |        |
| <i>Taf5l</i>    |               |        | Taf5l   |                              |        |
| <i>Taf6</i>     |               | Taf6   |         |                              |        |
| <i>Taf6l</i>    |               |        | Taf6l   |                              |        |
| <i>Tagap</i>    |               | Tagap  |         | Tagap                        |        |
| <i>Tagln</i>    | Tagln         |        |         |                              |        |
| <i>Tal2</i>     |               | Tal2   |         |                              |        |
| <i>Tanc1</i>    |               |        | Tanc1   |                              |        |
| <i>Tanc2</i>    |               |        | Tanc2   |                              | Tanc2  |
| <i>Tango2</i>   | Tango2        |        |         |                              |        |
| <i>Tank</i>     |               |        | Tank    |                              |        |
| <i>Taok1</i>    |               | Taok1  | Taok1   |                              |        |
| <i>Tap1</i>     |               |        | Tap1    |                              | Tap1   |
| <i>Tapbpl</i>   |               |        | Tapbpl  |                              | Tapbpl |
| <i>Tapt1</i>    | Tapt1         | Tapt1  | Tapt1   |                              |        |
| <i>Tarbp2</i>   |               | Tarbp2 | Tarbp2  |                              |        |
| <i>Tardbp</i>   | Tardbp        | Tardbp | Tardbp  |                              |        |
| <i>Tas2r102</i> | Tas2r102      |        |         |                              |        |

Suppl. Table 1  
(202/234)

|                 | CHIP-Seq hits |          |          | Unique hits with interactors |         |
|-----------------|---------------|----------|----------|------------------------------|---------|
|                 | unstimulated  | Ac       | LPS      | Ac                           | LPS     |
| <i>Tas2r103</i> | Tas2r103      | Tas2r103 | Tas2r103 |                              |         |
| <i>Tas2r108</i> | Tas2r108      |          |          |                              |         |
| <i>Tas2r117</i> |               | Tas2r117 |          |                              |         |
| <i>Tas2r118</i> |               |          | Tas2r118 |                              |         |
| <i>Tas2r121</i> |               | Tas2r121 |          |                              |         |
| <i>Tas2r129</i> | Tas2r129      |          |          |                              |         |
| <i>Tas2r131</i> |               |          | Tas2r131 |                              |         |
| <i>Tas2r134</i> | Tas2r134      |          |          |                              |         |
| <i>Tas2r135</i> |               |          | Tas2r135 |                              |         |
| <i>Tas2r136</i> | Tas2r136      |          |          |                              |         |
| <i>Tas2r138</i> | Tas2r138      | Tas2r138 |          |                              |         |
| <i>Tas2r143</i> |               | Tas2r143 |          |                              |         |
| <i>Tasp1</i>    | Tasp1         | Tasp1    | Tasp1    |                              |         |
| <i>Tatdn2</i>   |               | Tatdn2   |          |                              |         |
| <i>Tatdn3</i>   |               | Tatdn3   |          |                              |         |
| <i>Tax1bp1</i>  |               | Tax1bp1  |          |                              |         |
| <i>Tbata</i>    |               | Tbata    | Tbata    |                              |         |
| <i>Tbc1d1</i>   | Tbc1d1        |          |          |                              |         |
| <i>Tbc1d10a</i> | Tbc1d10a      | Tbc1d10a | Tbc1d10a |                              |         |
| <i>Tbc1d13</i>  |               |          | Tbc1d13  |                              | Tbc1d13 |
| <i>Tbc1d14</i>  |               | Tbc1d14  | Tbc1d14  |                              |         |
| <i>Tbc1d15</i>  |               |          | Tbc1d15  |                              |         |
| <i>Tbc1d16</i>  |               | Tbc1d16  |          |                              |         |
| <i>Tbc1d19</i>  |               |          | Tbc1d19  |                              | Tbc1d19 |
| <i>Tbc1d2</i>   |               | Tbc1d2   |          | Tbc1d2                       |         |
| <i>Tbc1d21</i>  | Tbc1d21       | Tbc1d21  |          |                              |         |
| <i>Tbc1d22a</i> |               |          | Tbc1d22a |                              |         |
| <i>Tbc1d22b</i> |               |          | Tbc1d22b |                              |         |
| <i>Tbc1d23</i>  |               |          | Tbc1d23  |                              | Tbc1d23 |
| <i>Tbc1d25</i>  |               | Tbc1d25  |          |                              |         |
| <i>Tbc1d8</i>   |               |          | Tbc1d8   |                              |         |
| <i>Tbc1d9b</i>  |               |          | Tbc1d9b  |                              |         |
| <i>Tbca</i>     |               | Tbca     |          |                              |         |
| <i>Tbcc</i>     | Tbcc          |          |          |                              |         |
| <i>Tbce</i>     |               | Tbce     | Tbce     |                              |         |
| <i>Tbck</i>     |               |          | Tbck     |                              |         |
| <i>Tbk1</i>     |               |          | Tbk1     |                              |         |
| <i>Tbl1xr1</i>  | Tbl1xr1       |          | Tbl1xr1  |                              |         |
| <i>Tbl2</i>     |               |          | Tbl2     |                              |         |
| <i>Tbp</i>      |               | Tbp      | Tbp      |                              |         |
| <i>Tbpl1</i>    | Tbpl1         | Tbpl1    |          |                              |         |
| <i>Tbrg4</i>    | Tbrg4         |          | Tbrg4    |                              |         |
| <i>Tbx1</i>     |               | Tbx1     |          |                              |         |
| <i>Tbx15</i>    |               |          | Tbx15    |                              |         |
| <i>Tbx19</i>    |               | Tbx19    |          |                              |         |
| <i>Tbx21</i>    | Tbx21         |          |          |                              |         |
| <i>Tbx22</i>    |               | Tbx22    |          | Tbx22                        |         |
| <i>Tbx3</i>     |               |          | Tbx3     |                              | Tbx3    |
| <i>Tbx4</i>     | Tbx4          |          | Tbx4     |                              |         |

Suppl. Table 1  
(203/234)

|                 | CHIP-Seq hits   |                 |                | Unique hits with interactors |               |
|-----------------|-----------------|-----------------|----------------|------------------------------|---------------|
|                 | unstimulated    | Ac              | LPS            | Ac                           | LPS           |
| <i>Tbx5</i>     |                 | <i>Tbx5</i>     |                | <i>Tbx5</i>                  |               |
| <i>Tbx6</i>     |                 |                 | <i>Tbx6</i>    |                              | <i>Tbx6</i>   |
| <i>Tbxa2r</i>   | <i>Tbxa2r</i>   | <i>Tbxa2r</i>   | <i>Tbxa2r</i>  |                              |               |
| <i>Tcaf3</i>    |                 |                 | <i>Tcaf3</i>   |                              |               |
| <i>Tcap</i>     |                 |                 | <i>Tcap</i>    |                              |               |
| <i>Tcea1</i>    |                 |                 | <i>Tcea1</i>   |                              | <i>Tcea1</i>  |
| <i>Tcea2</i>    | <i>Tcea2</i>    |                 |                |                              |               |
| <i>Tceal3</i>   |                 |                 | <i>Tceal3</i>  |                              |               |
| <i>Tceanc2</i>  |                 |                 | <i>Tceanc2</i> |                              |               |
| <i>Tceb1</i>    | <i>Tceb1</i>    | <i>Tceb1</i>    |                |                              |               |
| <i>Tceb2</i>    |                 | <i>Tceb2</i>    | <i>Tceb2</i>   |                              |               |
| <i>Tcerg1</i>   | <i>Tcerg1</i>   |                 | <i>Tcerg1</i>  |                              |               |
| <i>Tcerg1l</i>  |                 | <i>Tcerg1l</i>  |                |                              |               |
| <i>Tcf12</i>    | <i>Tcf12</i>    | <i>Tcf12</i>    | <i>Tcf12</i>   |                              |               |
| <i>Tcf21</i>    |                 |                 | <i>Tcf21</i>   |                              |               |
| <i>Tcf23</i>    | <i>Tcf23</i>    |                 |                |                              |               |
| <i>Tcf24</i>    |                 | <i>Tcf24</i>    |                |                              |               |
| <i>Tcf25</i>    | <i>Tcf25</i>    | <i>Tcf25</i>    |                |                              |               |
| <i>Tcf3</i>     |                 | <i>Tcf3</i>     |                | <i>Tcf3</i>                  |               |
| <i>Tcf7l1</i>   |                 |                 | <i>Tcf7l1</i>  |                              | <i>Tcf7l1</i> |
| <i>Tcf15</i>    | <i>Tcf15</i>    | <i>Tcf15</i>    | <i>Tcf15</i>   |                              |               |
| <i>Tchh</i>     | <i>Tchh</i>     |                 |                |                              |               |
| <i>Tchhl1</i>   |                 | <i>Tchhl1</i>   |                |                              |               |
| <i>Tcl1b2</i>   | <i>Tcl1b2</i>   |                 |                |                              |               |
| <i>Tcn2</i>     |                 | <i>Tcn2</i>     |                |                              |               |
| <i>Tcof1</i>    |                 | <i>Tcof1</i>    |                | <i>Tcof1</i>                 |               |
| <i>Tcp1</i>     |                 | <i>Tcp1</i>     | <i>Tcp1</i>    |                              |               |
| <i>Tcp10a</i>   |                 |                 | <i>Tcp10a</i>  |                              |               |
| <i>Tcp10b</i>   |                 |                 | <i>Tcp10b</i>  |                              |               |
| <i>Tcp11</i>    |                 | <i>Tcp11</i>    |                |                              |               |
| <i>Tcstv1</i>   |                 | <i>Tcstv1</i>   |                |                              |               |
| <i>Tcta</i>     |                 |                 | <i>Tcta</i>    |                              |               |
| <i>Tcte1</i>    | <i>Tcte1</i>    |                 |                |                              |               |
| <i>Tcte3</i>    | <i>Tcte3</i>    |                 | <i>Tcte3</i>   |                              |               |
| <i>Tctex1d1</i> | <i>Tctex1d1</i> | <i>Tctex1d1</i> |                |                              |               |
| <i>Tctex1d4</i> |                 | <i>Tctex1d4</i> |                |                              |               |
| <i>Tctn1</i>    |                 |                 | <i>Tctn1</i>   |                              |               |
| <i>Tdg</i>      |                 |                 | <i>Tdg</i>     |                              |               |
| <i>Tdp2</i>     | <i>Tdp2</i>     |                 | <i>Tdp2</i>    |                              |               |
| <i>Tdpoz3</i>   |                 |                 | <i>Tdpoz3</i>  |                              |               |
| <i>Tdpoz5</i>   |                 |                 | <i>Tdpoz5</i>  |                              |               |
| <i>Tdrd12</i>   |                 |                 | <i>Tdrd12</i>  |                              |               |
| <i>Tdrd3</i>    |                 | <i>Tdrd3</i>    |                |                              |               |
| <i>Tdrd6</i>    | <i>Tdrd6</i>    |                 |                |                              |               |
| <i>Tdrd7</i>    |                 | <i>Tdrd7</i>    |                |                              |               |
| <i>Tdrd9</i>    |                 | <i>Tdrd9</i>    |                |                              |               |
| <i>Tdrkh</i>    |                 | <i>Tdrkh</i>    |                |                              |               |
| <i>Tead1</i>    |                 | <i>Tead1</i>    |                | <i>Tead1</i>                 |               |
| <i>Tead2</i>    |                 |                 | <i>Tead2</i>   |                              |               |

Suppl. Table 1  
(204/234)

|                | ChIP-Seq hits  |               |                | Unique hits with interactors |                |
|----------------|----------------|---------------|----------------|------------------------------|----------------|
|                | unstimulated   | Ac            | LPS            | Ac                           | LPS            |
| <i>Tec</i>     |                | <i>Tec</i>    |                | <i>Tec</i>                   |                |
| <i>Tecpr1</i>  |                | <i>Tecpr1</i> |                |                              |                |
| <i>Tecpr2</i>  | <i>Tecpr2</i>  | <i>Tecpr2</i> | <i>Tecpr2</i>  |                              |                |
| <i>Tecrl</i>   |                | <i>Tecrl</i>  |                |                              |                |
| <i>Tectb</i>   |                | <i>Tectb</i>  |                |                              |                |
| <i>Teddm1b</i> | <i>Teddm1b</i> |               |                |                              |                |
| <i>Tef</i>     |                | <i>Tef</i>    |                |                              |                |
| <i>Tekt1</i>   |                | <i>Tekt1</i>  | <i>Tekt1</i>   |                              |                |
| <i>Tekt3</i>   |                | <i>Tekt3</i>  |                |                              |                |
| <i>Tekt5</i>   |                |               | <i>Tekt5</i>   |                              |                |
| <i>Telo2</i>   |                | <i>Telo2</i>  |                |                              |                |
| <i>Ten1</i>    | <i>Ten1</i>    |               | <i>Ten1</i>    |                              |                |
| <i>Tepp</i>    |                | <i>Tepp</i>   |                |                              |                |
| <i>Terc</i>    |                |               | <i>Terc</i>    |                              |                |
| <i>Terf2</i>   | <i>Terf2</i>   |               |                |                              |                |
| <i>Terf2ip</i> |                |               | <i>Terf2ip</i> |                              | <i>Terf2ip</i> |
| <i>Tert</i>    |                | <i>Tert</i>   |                |                              |                |
| <i>Tesc</i>    |                |               | <i>Tesc</i>    |                              | <i>Tesc</i>    |
| <i>Tesk1</i>   | <i>Tesk1</i>   |               | <i>Tesk1</i>   |                              |                |
| <i>Tesk2</i>   |                | <i>Tesk2</i>  |                |                              |                |
| <i>Tet2</i>    | <i>Tet2</i>    | <i>Tet2</i>   |                |                              |                |
| <i>Tex11</i>   | <i>Tex11</i>   |               | <i>Tex11</i>   |                              |                |
| <i>Tex12</i>   | <i>Tex12</i>   |               | <i>Tex12</i>   |                              |                |
| <i>Tex14</i>   |                | <i>Tex14</i>  | <i>Tex14</i>   |                              |                |
| <i>Tex15</i>   |                |               | <i>Tex15</i>   |                              |                |
| <i>Tex19.1</i> |                |               | <i>Tex19.1</i> |                              |                |
| <i>Tex2</i>    | <i>Tex2</i>    |               |                |                              |                |
| <i>Tex261</i>  |                | <i>Tex261</i> |                |                              |                |
| <i>Tex264</i>  |                | <i>Tex264</i> |                |                              |                |
| <i>Tex28</i>   |                | <i>Tex28</i>  |                |                              |                |
| <i>Tex30</i>   |                |               | <i>Tex30</i>   |                              |                |
| <i>Tfap2a</i>  |                | <i>Tfap2a</i> | <i>Tfap2a</i>  |                              |                |
| <i>Tfap2b</i>  |                | <i>Tfap2b</i> | <i>Tfap2b</i>  |                              |                |
| <i>Tfap2c</i>  |                | <i>Tfap2c</i> |                |                              |                |
| <i>Tfap2d</i>  |                |               | <i>Tfap2d</i>  |                              |                |
| <i>Tfap2e</i>  | <i>Tfap2e</i>  |               |                |                              |                |
| <i>Tfap4</i>   | <i>Tfap4</i>   | <i>Tfap4</i>  | <i>Tfap4</i>   |                              |                |
| <i>Tfb1m</i>   |                |               | <i>Tfb1m</i>   |                              |                |
| <i>Tfcp2</i>   | <i>Tfcp2</i>   | <i>Tfcp2</i>  |                |                              |                |
| <i>Tfdp1</i>   | <i>Tfdp1</i>   | <i>Tfdp1</i>  |                |                              |                |
| <i>Tfdp2</i>   |                | <i>Tfdp2</i>  |                |                              |                |
| <i>Tfeb</i>    |                | <i>Tfeb</i>   |                |                              |                |
| <i>Tff1</i>    | <i>Tff1</i>    |               |                |                              |                |
| <i>Tfip11</i>  |                |               | <i>Tfip11</i>  |                              |                |
| <i>Tfpi2</i>   |                |               | <i>Tfpi2</i>   |                              |                |
| <i>Tfrc</i>    |                | <i>Tfrc</i>   |                |                              |                |
| <i>Tg</i>      |                | <i>Tg</i>     | <i>Tg</i>      |                              |                |
| <i>Tgds</i>    | <i>Tgds</i>    |               | <i>Tgds</i>    |                              |                |
| <i>Tgfb1</i>   |                |               | <i>Tgfb1</i>   |                              | <i>Tgfb1</i>   |

Suppl. Table 1  
(205/234)

|                 | ChIP-Seq hits  |                 |                | Unique hits with interactors |               |
|-----------------|----------------|-----------------|----------------|------------------------------|---------------|
|                 | unstimulated   | Ac              | LPS            | Ac                           | LPS           |
| <i>Tgfb2</i>    |                | <i>Tgfb2</i>    |                | <i>Tgfb2</i>                 |               |
| <i>Tgfbrap1</i> |                | <i>Tgfbrap1</i> |                |                              |               |
| <i>Tgif1</i>    | <i>Tgif1</i>   | <i>Tgif1</i>    | <i>Tgif1</i>   |                              |               |
| <i>Tgm3</i>     | <i>Tgm3</i>    |                 |                |                              |               |
| <i>Tgm6</i>     | <i>Tgm6</i>    |                 | <i>Tgm6</i>    |                              |               |
| <i>Tgm7</i>     |                | <i>Tgm7</i>     |                |                              |               |
| <i>Tgoln1</i>   |                |                 | <i>Tgoln1</i>  |                              | <i>Tgoln1</i> |
| <i>Tgoln2</i>   |                |                 | <i>Tgoln2</i>  |                              |               |
| <i>Tgs1</i>     | <i>Tgs1</i>    |                 |                |                              |               |
| <i>Tgtp1</i>    |                |                 | <i>Tgtp1</i>   |                              | <i>Tgtp1</i>  |
| <i>Tgtp2</i>    |                |                 | <i>Tgtp2</i>   |                              |               |
| <i>Th</i>       |                |                 | <i>Th</i>      |                              |               |
| <i>Tha1</i>     |                |                 | <i>Tha1</i>    |                              |               |
| <i>Thap2</i>    |                |                 | <i>Thap2</i>   |                              | <i>Thap2</i>  |
| <i>Thap6</i>    |                |                 | <i>Thap6</i>   |                              |               |
| <i>Thbd</i>     |                |                 | <i>Thbd</i>    |                              |               |
| <i>Thbs1</i>    |                |                 | <i>Thbs1</i>   |                              |               |
| <i>Thbs4</i>    |                | <i>Thbs4</i>    |                |                              |               |
| <i>Them5</i>    |                |                 | <i>Them5</i>   |                              |               |
| <i>Them6</i>    | <i>Them6</i>   |                 |                |                              |               |
| <i>Themis</i>   |                |                 | <i>Themis</i>  |                              |               |
| <i>Themis2</i>  |                |                 | <i>Themis2</i> |                              |               |
| <i>Thg1l</i>    |                | <i>Thg1l</i>    | <i>Thg1l</i>   |                              |               |
| <i>Thnsl1</i>   |                | <i>Thnsl1</i>   |                |                              |               |
| <i>Thoc1</i>    |                |                 | <i>Thoc1</i>   |                              |               |
| <i>Thoc2</i>    | <i>Thoc2</i>   | <i>Thoc2</i>    | <i>Thoc2</i>   |                              |               |
| <i>Thoc3</i>    |                |                 | <i>Thoc3</i>   |                              |               |
| <i>Thoc5</i>    |                | <i>Thoc5</i>    |                |                              |               |
| <i>Thoc6</i>    | <i>Thoc6</i>   |                 | <i>Thoc6</i>   |                              |               |
| <i>Thop1</i>    |                |                 | <i>Thop1</i>   |                              |               |
| <i>Thrap3</i>   |                |                 | <i>Thrap3</i>  |                              |               |
| <i>Thsd7b</i>   |                | <i>Thsd7b</i>   |                |                              |               |
| <i>Thtpa</i>    |                |                 | <i>Thtpa</i>   |                              |               |
| <i>Thumpd1</i>  |                |                 | <i>Thumpd1</i> |                              |               |
| <i>Thumpd3</i>  |                |                 | <i>Thumpd3</i> |                              |               |
| <i>Thyn1</i>    | <i>Thyn1</i>   |                 |                |                              |               |
| <i>Tial1</i>    |                | <i>Tial1</i>    |                |                              |               |
| <i>Tiam1</i>    | <i>Tiam1</i>   |                 | <i>Tiam1</i>   |                              |               |
| <i>Tiam2</i>    | <i>Tiam2</i>   |                 |                |                              |               |
| <i>Ticam1</i>   | <i>Ticam1</i>  | <i>Ticam1</i>   | <i>Ticam1</i>  |                              |               |
| <i>Ticrr</i>    |                | <i>Ticrr</i>    | <i>Ticrr</i>   |                              |               |
| <i>Tie1</i>     |                | <i>Tie1</i>     |                | <i>Tie1</i>                  |               |
| <i>Tifa</i>     |                | <i>Tifa</i>     | <i>Tifa</i>    |                              |               |
| <i>Tigd3</i>    |                |                 | <i>Tigd3</i>   |                              | <i>Tigd3</i>  |
| <i>Tigd4</i>    | <i>Tigd4</i>   |                 | <i>Tigd4</i>   |                              |               |
| <i>Timd2</i>    |                | <i>Timd2</i>    |                |                              |               |
| <i>Timm10</i>   | <i>Timm10</i>  | <i>Timm10</i>   | <i>Timm10</i>  |                              |               |
| <i>Timm10b</i>  | <i>Timm10b</i> |                 |                |                              |               |
| <i>Timm17a</i>  | <i>Timm17a</i> |                 |                |                              |               |

Suppl. Table 1  
(206/234)

|                | ChIP-Seq hits |         |         | Unique hits with interactors |        |
|----------------|---------------|---------|---------|------------------------------|--------|
|                | unstimulated  | Ac      | LPS     | Ac                           | LPS    |
| <i>Timm17b</i> | Timm17b       | Timm17b | Timm17b |                              |        |
| <i>Timm21</i>  |               | Timm21  |         |                              |        |
| <i>Timm22</i>  | Timm22        | Timm22  | Timm22  |                              |        |
| <i>Timm44</i>  |               |         | Timm44  |                              |        |
| <i>Timm8a1</i> |               |         | Timm8a1 |                              |        |
| <i>Timm8a2</i> | Timm8a2       | Timm8a2 | Timm8a2 |                              |        |
| <i>Timm8b</i>  |               | Timm8b  | Timm8b  |                              |        |
| <i>Timmdc1</i> |               | Timmdc1 |         | Timmdc1                      |        |
| <i>Timp2</i>   |               | Timp2   |         | Timp2                        |        |
| <i>Timp3</i>   |               | Timp3   |         | Timp3                        |        |
| <i>Timp4</i>   |               |         | Timp4   |                              |        |
| <i>Tiparp</i>  |               |         | Tiparp  |                              |        |
| <i>Tirap</i>   |               | Tirap   | Tirap   |                              |        |
| <i>Tk1</i>     |               | Tk1     |         | Tk1                          |        |
| <i>Tk2</i>     |               |         | Tk2     |                              |        |
| <i>Tle4</i>    | Tle4          |         |         |                              |        |
| <i>Tle6</i>    | Tle6          | Tle6    | Tle6    |                              |        |
| <i>Tlk1</i>    |               | Tlk1    |         |                              |        |
| <i>Tlk2</i>    | Tlk2          |         |         |                              |        |
| <i>Tll1</i>    |               |         | Tll1    |                              |        |
| <i>Tll2</i>    | Tll2          |         |         |                              |        |
| <i>Tlr1</i>    | Tlr1          |         |         |                              |        |
| <i>Tlr12</i>   |               | Tlr12   |         |                              |        |
| <i>Tlr8</i>    |               |         | Tlr8    |                              |        |
| <i>Tlr9</i>    | Tlr9          | Tlr9    | Tlr9    |                              |        |
| <i>Tlx2</i>    |               | Tlx2    | Tlx2    |                              |        |
| <i>Tm2d2</i>   |               |         | Tm2d2   |                              |        |
| <i>Tm2d3</i>   | Tm2d3         |         |         |                              |        |
| <i>Tm4sf1</i>  |               | Tm4sf1  |         |                              |        |
| <i>Tm6sf1</i>  |               |         | Tm6sf1  |                              | Tm6sf1 |
| <i>Tm7sf2</i>  |               | Tm7sf2  |         |                              |        |
| <i>Tm7sf3</i>  | Tm7sf3        |         | Tm7sf3  |                              |        |
| <i>Tm9sf4</i>  |               | Tm9sf4  | Tm9sf4  |                              |        |
| <i>Tma16</i>   |               | Tma16   |         |                              |        |
| <i>Tma7</i>    |               | Tma7    | Tma7    |                              |        |
| <i>Tmbim6</i>  |               |         | Tmbim6  |                              |        |
| <i>Tmbim7</i>  |               | Tmbim7  |         |                              |        |
| <i>Tmc6</i>    |               |         | Tmc6    |                              |        |
| <i>Tmc8</i>    |               |         | Tmc8    |                              |        |
| <i>Tmcc3</i>   | Tmcc3         |         |         |                              |        |
| <i>Tmco2</i>   |               |         | Tmco2   |                              |        |
| <i>Tmco4</i>   |               | Tmco4   |         |                              |        |
| <i>Tmco6</i>   |               | Tmco6   |         |                              |        |
| <i>Tmed1</i>   | Tmed1         | Tmed1   | Tmed1   |                              |        |
| <i>Tmed10</i>  |               |         | Tmed10  |                              |        |
| <i>Tmed3</i>   |               |         | Tmed3   |                              |        |
| <i>Tmed4</i>   |               |         | Tmed4   |                              |        |
| <i>Tmed5</i>   | Tmed5         | Tmed5   | Tmed5   |                              |        |
| <i>Tmed6</i>   |               |         | Tmed6   |                              |        |

Suppl. Table 1  
(207/234)

|                 | CHIP-Seq hits   |                 |                 | Unique hits with interactors |                |
|-----------------|-----------------|-----------------|-----------------|------------------------------|----------------|
|                 | unstimulated    | Ac              | LPS             | Ac                           | LPS            |
| <i>Tmed7</i>    |                 |                 | <i>Tmed7</i>    |                              |                |
| <i>Tmed8</i>    |                 |                 | <i>Tmed8</i>    |                              | <i>Tmed8</i>   |
| <i>Tmed9</i>    | <i>Tmed9</i>    |                 |                 |                              |                |
| <i>Tmem100</i>  |                 |                 | <i>Tmem100</i>  |                              | <i>Tmem100</i> |
| <i>Tmem104</i>  |                 |                 | <i>Tmem104</i>  |                              |                |
| <i>Tmem106b</i> | <i>Tmem106b</i> |                 | <i>Tmem106b</i> |                              |                |
| <i>Tmem106c</i> | <i>Tmem106c</i> | <i>Tmem106c</i> |                 |                              |                |
| <i>Tmem107</i>  | <i>Tmem107</i>  | <i>Tmem107</i>  |                 |                              |                |
| <i>Tmem109</i>  |                 | <i>Tmem109</i>  |                 | <i>Tmem109</i>               |                |
| <i>Tmem116</i>  |                 |                 | <i>Tmem116</i>  |                              |                |
| <i>Tmem120a</i> | <i>Tmem120a</i> |                 |                 |                              |                |
| <i>Tmem120b</i> | <i>Tmem120b</i> |                 | <i>Tmem120b</i> |                              |                |
| <i>Tmem121</i>  | <i>Tmem121</i>  | <i>Tmem121</i>  | <i>Tmem121</i>  |                              |                |
| <i>Tmem125</i>  |                 | <i>Tmem125</i>  | <i>Tmem125</i>  |                              |                |
| <i>Tmem126b</i> |                 |                 | <i>Tmem126b</i> |                              |                |
| <i>Tmem127</i>  |                 |                 | <i>Tmem127</i>  |                              |                |
| <i>Tmem128</i>  |                 | <i>Tmem128</i>  |                 |                              |                |
| <i>Tmem129</i>  | <i>Tmem129</i>  |                 |                 |                              |                |
| <i>Tmem130</i>  |                 |                 | <i>Tmem130</i>  |                              |                |
| <i>Tmem131</i>  |                 | <i>Tmem131</i>  | <i>Tmem131</i>  |                              |                |
| <i>Tmem132e</i> |                 | <i>Tmem132e</i> |                 |                              |                |
| <i>Tmem135</i>  | <i>Tmem135</i>  | <i>Tmem135</i>  | <i>Tmem135</i>  |                              |                |
| <i>Tmem136</i>  |                 |                 | <i>Tmem136</i>  |                              |                |
| <i>Tmem138</i>  | <i>Tmem138</i>  | <i>Tmem138</i>  |                 |                              |                |
| <i>Tmem139</i>  |                 |                 | <i>Tmem139</i>  |                              |                |
| <i>Tmem140</i>  |                 | <i>Tmem140</i>  |                 |                              |                |
| <i>Tmem143</i>  |                 |                 | <i>Tmem143</i>  |                              |                |
| <i>Tmem144</i>  | <i>Tmem144</i>  |                 |                 |                              |                |
| <i>Tmem145</i>  |                 | <i>Tmem145</i>  |                 |                              |                |
| <i>Tmem147</i>  |                 |                 | <i>Tmem147</i>  |                              |                |
| <i>Tmem14a</i>  |                 | <i>Tmem14a</i>  |                 | <i>Tmem14a</i>               |                |
| <i>Tmem150c</i> |                 | <i>Tmem150c</i> |                 |                              |                |
| <i>Tmem151a</i> |                 |                 | <i>Tmem151a</i> |                              |                |
| <i>Tmem158</i>  |                 | <i>Tmem158</i>  |                 |                              |                |
| <i>Tmem159</i>  |                 | <i>Tmem159</i>  |                 |                              |                |
| <i>Tmem160</i>  |                 | <i>Tmem160</i>  | <i>Tmem160</i>  |                              |                |
| <i>Tmem161a</i> | <i>Tmem161a</i> | <i>Tmem161a</i> | <i>Tmem161a</i> |                              |                |
| <i>Tmem164</i>  |                 | <i>Tmem164</i>  | <i>Tmem164</i>  |                              |                |
| <i>Tmem167b</i> |                 | <i>Tmem167b</i> |                 |                              |                |
| <i>Tmem168</i>  |                 |                 | <i>Tmem168</i>  |                              |                |
| <i>Tmem170</i>  |                 |                 | <i>Tmem170</i>  |                              |                |
| <i>Tmem171</i>  | <i>Tmem171</i>  |                 |                 |                              |                |
| <i>Tmem173</i>  |                 | <i>Tmem173</i>  | <i>Tmem173</i>  |                              |                |
| <i>Tmem174</i>  |                 | <i>Tmem174</i>  |                 |                              |                |
| <i>Tmem175</i>  | <i>Tmem175</i>  | <i>Tmem175</i>  | <i>Tmem175</i>  |                              |                |
| <i>Tmem177</i>  |                 | <i>Tmem177</i>  | <i>Tmem177</i>  |                              |                |
| <i>Tmem178</i>  | <i>Tmem178</i>  | <i>Tmem178</i>  |                 |                              |                |
| <i>Tmem178b</i> |                 | <i>Tmem178b</i> |                 | <i>Tmem178b</i>              |                |
| <i>Tmem179b</i> |                 | <i>Tmem179b</i> |                 |                              |                |

Suppl. Table 1  
(208/234)

|                    | ChIP-Seq hits   |                    |                    | Unique hits with interactors |                 |
|--------------------|-----------------|--------------------|--------------------|------------------------------|-----------------|
|                    | unstimulated    | Ac                 | LPS                | Ac                           | LPS             |
| <i>Tmem180</i>     |                 | <i>Tmem180</i>     |                    |                              |                 |
| <i>Tmem181a</i>    |                 |                    | <i>Tmem181a</i>    |                              |                 |
| <i>Tmem181b-ps</i> |                 | <i>Tmem181b-ps</i> | <i>Tmem181b-ps</i> |                              |                 |
| <i>Tmem182</i>     |                 |                    | <i>Tmem182</i>     |                              |                 |
| <i>Tmem183a</i>    | <i>Tmem183a</i> | <i>Tmem183a</i>    | <i>Tmem183a</i>    |                              |                 |
| <i>Tmem184c</i>    |                 |                    | <i>Tmem184c</i>    |                              |                 |
| <i>Tmem186</i>     |                 | <i>Tmem186</i>     |                    |                              |                 |
| <i>Tmem189</i>     |                 |                    | <i>Tmem189</i>     |                              |                 |
| <i>Tmem19</i>      |                 |                    | <i>Tmem19</i>      |                              | <i>Tmem19</i>   |
| <i>Tmem191c</i>    |                 | <i>Tmem191c</i>    | <i>Tmem191c</i>    |                              |                 |
| <i>Tmem192</i>     |                 | <i>Tmem192</i>     |                    |                              |                 |
| <i>Tmem194</i>     | <i>Tmem194</i>  |                    |                    |                              |                 |
| <i>Tmem194b</i>    |                 |                    | <i>Tmem194b</i>    |                              | <i>Tmem194b</i> |
| <i>Tmem196</i>     |                 |                    | <i>Tmem196</i>     |                              |                 |
| <i>Tmem198</i>     | <i>Tmem198</i>  |                    | <i>Tmem198</i>     |                              |                 |
| <i>Tmem198b</i>    | <i>Tmem198b</i> | <i>Tmem198b</i>    |                    |                              |                 |
| <i>Tmem2</i>       | <i>Tmem2</i>    |                    |                    |                              |                 |
| <i>Tmem200a</i>    |                 | <i>Tmem200a</i>    |                    | <i>Tmem200a</i>              |                 |
| <i>Tmem200b</i>    |                 | <i>Tmem200b</i>    |                    |                              |                 |
| <i>Tmem201</i>     | <i>Tmem201</i>  | <i>Tmem201</i>     | <i>Tmem201</i>     |                              |                 |
| <i>Tmem202</i>     |                 | <i>Tmem202</i>     |                    |                              |                 |
| <i>Tmem204</i>     |                 | <i>Tmem204</i>     |                    |                              |                 |
| <i>Tmem205</i>     | <i>Tmem205</i>  |                    |                    |                              |                 |
| <i>Tmem206</i>     |                 | <i>Tmem206</i>     |                    | <i>Tmem206</i>               |                 |
| <i>Tmem208</i>     |                 |                    | <i>Tmem208</i>     |                              |                 |
| <i>Tmem209</i>     |                 | <i>Tmem209</i>     |                    |                              |                 |
| <i>Tmem210</i>     |                 | <i>Tmem210</i>     | <i>Tmem210</i>     |                              |                 |
| <i>Tmem211</i>     | <i>Tmem211</i>  |                    |                    |                              |                 |
| <i>Tmem214</i>     |                 |                    | <i>Tmem214</i>     |                              |                 |
| <i>Tmem217</i>     |                 | <i>Tmem217</i>     |                    |                              |                 |
| <i>Tmem222</i>     | <i>Tmem222</i>  | <i>Tmem222</i>     | <i>Tmem222</i>     |                              |                 |
| <i>Tmem223</i>     |                 |                    | <i>Tmem223</i>     |                              |                 |
| <i>Tmem225</i>     | <i>Tmem225</i>  |                    |                    |                              |                 |
| <i>Tmem229a</i>    |                 |                    | <i>Tmem229a</i>    |                              |                 |
| <i>Tmem229b</i>    |                 | <i>Tmem229b</i>    |                    |                              |                 |
| <i>Tmem230</i>     |                 | <i>Tmem230</i>     | <i>Tmem230</i>     |                              |                 |
| <i>Tmem231</i>     |                 | <i>Tmem231</i>     | <i>Tmem231</i>     |                              |                 |
| <i>Tmem233</i>     |                 |                    | <i>Tmem233</i>     |                              |                 |
| <i>Tmem234</i>     |                 |                    | <i>Tmem234</i>     |                              |                 |
| <i>Tmem235</i>     |                 | <i>Tmem235</i>     |                    |                              |                 |
| <i>Tmem236</i>     | <i>Tmem236</i>  |                    |                    |                              |                 |
| <i>Tmem237</i>     |                 |                    | <i>Tmem237</i>     |                              |                 |
| <i>Tmem238</i>     |                 | <i>Tmem238</i>     | <i>Tmem238</i>     |                              |                 |
| <i>Tmem240</i>     |                 | <i>Tmem240</i>     |                    |                              |                 |
| <i>Tmem243</i>     |                 | <i>Tmem243</i>     |                    |                              |                 |
| <i>Tmem245</i>     |                 | <i>Tmem245</i>     |                    | <i>Tmem245</i>               |                 |
| <i>Tmem246</i>     |                 | <i>Tmem246</i>     |                    |                              |                 |
| <i>Tmem25</i>      |                 |                    | <i>Tmem25</i>      |                              | <i>Tmem25</i>   |
| <i>Tmem251</i>     | <i>Tmem251</i>  |                    |                    |                              |                 |



Suppl. Table 1  
(209/234)

|                  | ChIP-Seq hits  |                  |                  | Unique hits with interactors |               |
|------------------|----------------|------------------|------------------|------------------------------|---------------|
|                  | unstimulated   | Ac               | LPS              | Ac                           | LPS           |
| <i>Tmem253</i>   |                |                  | <i>Tmem253</i>   |                              |               |
| <i>Tmem258</i>   |                |                  | <i>Tmem258</i>   |                              |               |
| <i>Tmem26</i>    |                | <i>Tmem26</i>    | <i>Tmem26</i>    |                              |               |
| <i>Tmem261</i>   |                | <i>Tmem261</i>   |                  |                              |               |
| <i>Tmem263</i>   | <i>Tmem263</i> |                  |                  |                              |               |
| <i>Tmem265</i>   |                |                  | <i>Tmem265</i>   |                              |               |
| <i>Tmem37</i>    |                |                  | <i>Tmem37</i>    |                              |               |
| <i>Tmem38a</i>   |                |                  | <i>Tmem38a</i>   |                              |               |
| <i>Tmem38b</i>   |                | <i>Tmem38b</i>   | <i>Tmem38b</i>   |                              |               |
| <i>Tmem39a</i>   | <i>Tmem39a</i> |                  | <i>Tmem39a</i>   |                              |               |
| <i>Tmem40</i>    |                | <i>Tmem40</i>    |                  |                              |               |
| <i>Tmem41b</i>   |                | <i>Tmem41b</i>   |                  |                              |               |
| <i>Tmem42</i>    |                | <i>Tmem42</i>    |                  |                              |               |
| <i>Tmem43</i>    | <i>Tmem43</i>  | <i>Tmem43</i>    | <i>Tmem43</i>    |                              |               |
| <i>Tmem44</i>    |                | <i>Tmem44</i>    |                  |                              |               |
| <i>Tmem45a</i>   |                |                  | <i>Tmem45a</i>   |                              |               |
| <i>Tmem47</i>    | <i>Tmem47</i>  | <i>Tmem47</i>    | <i>Tmem47</i>    |                              |               |
| <i>Tmem5</i>     |                |                  | <i>Tmem5</i>     |                              |               |
| <i>Tmem50b</i>   |                |                  | <i>Tmem50b</i>   |                              |               |
| <i>Tmem51os1</i> |                | <i>Tmem51os1</i> | <i>Tmem51os1</i> |                              |               |
| <i>Tmem52b</i>   |                | <i>Tmem52b</i>   |                  |                              |               |
| <i>Tmem54</i>    |                |                  | <i>Tmem54</i>    |                              |               |
| <i>Tmem55a</i>   | <i>Tmem55a</i> | <i>Tmem55a</i>   | <i>Tmem55a</i>   |                              |               |
| <i>Tmem59l</i>   | <i>Tmem59l</i> |                  |                  |                              |               |
| <i>Tmem63b</i>   | <i>Tmem63b</i> |                  |                  |                              |               |
| <i>Tmem64</i>    |                | <i>Tmem64</i>    |                  |                              |               |
| <i>Tmem67</i>    |                |                  | <i>Tmem67</i>    |                              |               |
| <i>Tmem68</i>    | <i>Tmem68</i>  |                  |                  |                              |               |
| <i>Tmem69</i>    |                |                  | <i>Tmem69</i>    |                              | <i>Tmem69</i> |
| <i>Tmem70</i>    |                | <i>Tmem70</i>    |                  |                              |               |
| <i>Tmem72</i>    |                | <i>Tmem72</i>    |                  | <i>Tmem72</i>                |               |
| <i>Tmem74</i>    |                |                  | <i>Tmem74</i>    |                              |               |
| <i>Tmem79</i>    |                | <i>Tmem79</i>    | <i>Tmem79</i>    |                              |               |
| <i>Tmem8</i>     |                |                  | <i>Tmem8</i>     |                              |               |
| <i>Tmem80</i>    |                |                  | <i>Tmem80</i>    |                              |               |
| <i>Tmem81</i>    |                |                  | <i>Tmem81</i>    |                              |               |
| <i>Tmem82</i>    |                |                  | <i>Tmem82</i>    |                              |               |
| <i>Tmem86b</i>   |                |                  | <i>Tmem86b</i>   |                              |               |
| <i>Tmem87a</i>   |                | <i>Tmem87a</i>   |                  | <i>Tmem87a</i>               |               |
| <i>Tmem87b</i>   |                | <i>Tmem87b</i>   |                  |                              |               |
| <i>Tmem88</i>    |                | <i>Tmem88</i>    | <i>Tmem88</i>    |                              |               |
| <i>Tmem8b</i>    |                | <i>Tmem8b</i>    |                  |                              |               |
| <i>Tmem9</i>     | <i>Tmem9</i>   | <i>Tmem9</i>     |                  |                              |               |
| <i>Tmem91</i>    |                |                  | <i>Tmem91</i>    |                              |               |
| <i>Tmigd3</i>    |                | <i>Tmigd3</i>    | <i>Tmigd3</i>    |                              |               |
| <i>Tmod4</i>     | <i>Tmod4</i>   |                  |                  |                              |               |
| <i>Tmpo</i>      |                |                  | <i>Tmpo</i>      |                              | <i>Tmpo</i>   |
| <i>Tmppe</i>     | <i>Tmppe</i>   |                  |                  |                              |               |
| <i>Tmprss11d</i> |                | <i>Tmprss11d</i> |                  |                              |               |

Suppl. Table 1  
(210/234)

|                  | CHIP-Seq hits   |                  |                  | Unique hits with interactors |                  |
|------------------|-----------------|------------------|------------------|------------------------------|------------------|
|                  | unstimulated    | Ac               | LPS              | Ac                           | LPS              |
| <i>Tmprss11f</i> |                 | <i>Tmprss11f</i> |                  |                              |                  |
| <i>Tmprss11g</i> |                 |                  | <i>Tmprss11g</i> |                              |                  |
| <i>Tmprss12</i>  |                 |                  | <i>Tmprss12</i>  |                              |                  |
| <i>Tmprss13</i>  |                 | <i>Tmprss13</i>  |                  | <i>Tmprss13</i>              |                  |
| <i>Tmprss15</i>  |                 | <i>Tmprss15</i>  |                  |                              |                  |
| <i>Tmprss5</i>   |                 |                  | <i>Tmprss5</i>   |                              |                  |
| <i>Tmprss7</i>   |                 | <i>Tmprss7</i>   |                  |                              |                  |
| <i>Tmsb10</i>    |                 |                  | <i>Tmsb10</i>    |                              |                  |
| <i>Tmsb15b2</i>  | <i>Tmsb15b2</i> |                  |                  |                              |                  |
| <i>Tmsb4x</i>    |                 | <i>Tmsb4x</i>    |                  |                              |                  |
| <i>Tmtc3</i>     | <i>Tmtc3</i>    | <i>Tmtc3</i>     |                  |                              |                  |
| <i>Tmtc4</i>     | <i>Tmtc4</i>    |                  |                  |                              |                  |
| <i>Tmub2</i>     |                 |                  | <i>Tmub2</i>     |                              |                  |
| <i>Tmx1</i>      |                 |                  | <i>Tmx1</i>      |                              |                  |
| <i>Tnf</i>       |                 |                  | <i>Tnf</i>       |                              | <i>Tnf</i>       |
| <i>Tnfaip1</i>   |                 |                  | <i>Tnfaip1</i>   |                              | <i>Tnfaip1</i>   |
| <i>Tnfaip2</i>   | <i>Tnfaip2</i>  |                  |                  |                              |                  |
| <i>Tnfaip3</i>   |                 | <i>Tnfaip3</i>   |                  |                              |                  |
| <i>Tnfaip8</i>   | <i>Tnfaip8</i>  | <i>Tnfaip8</i>   |                  |                              |                  |
| <i>Tnfaip8l2</i> |                 | <i>Tnfaip8l2</i> |                  |                              |                  |
| <i>Tnfrsf10b</i> |                 | <i>Tnfrsf10b</i> |                  | <i>Tnfrsf10b</i>             |                  |
| <i>Tnfrsf11a</i> |                 | <i>Tnfrsf11a</i> |                  | <i>Tnfrsf11a</i>             |                  |
| <i>Tnfrsf12a</i> |                 |                  | <i>Tnfrsf12a</i> |                              | <i>Tnfrsf12a</i> |
| <i>Tnfrsf18</i>  |                 |                  | <i>Tnfrsf18</i>  |                              |                  |
| <i>Tnfrsf1a</i>  | <i>Tnfrsf1a</i> | <i>Tnfrsf1a</i>  |                  |                              |                  |
| <i>Tnfrsf1b</i>  |                 | <i>Tnfrsf1b</i>  |                  | <i>Tnfrsf1b</i>              |                  |
| <i>Tnfrsf22</i>  |                 | <i>Tnfrsf22</i>  |                  |                              |                  |
| <i>Tnfrsf26</i>  |                 | <i>Tnfrsf26</i>  | <i>Tnfrsf26</i>  |                              |                  |
| <i>Tnfrsf4</i>   |                 | <i>Tnfrsf4</i>   | <i>Tnfrsf4</i>   |                              |                  |
| <i>Tnfsf10</i>   | <i>Tnfsf10</i>  | <i>Tnfsf10</i>   | <i>Tnfsf10</i>   |                              |                  |
| <i>Tnfsf11</i>   |                 | <i>Tnfsf11</i>   |                  | <i>Tnfsf11</i>               |                  |
| <i>Tnfsf12</i>   |                 |                  | <i>Tnfsf12</i>   |                              |                  |
| <i>Tnfsf13</i>   | <i>Tnfsf13</i>  |                  |                  |                              |                  |
| <i>Tnfsf13b</i>  |                 | <i>Tnfsf13b</i>  |                  |                              |                  |
| <i>Tnfsf8</i>    | <i>Tnfsf8</i>   |                  |                  |                              |                  |
| <i>Tnfsf9</i>    |                 |                  | <i>Tnfsf9</i>    |                              |                  |
| <i>Tnfsfm13</i>  |                 |                  | <i>Tnfsfm13</i>  |                              |                  |
| <i>Tnip1</i>     |                 | <i>Tnip1</i>     |                  |                              |                  |
| <i>Tnip2</i>     | <i>Tnip2</i>    |                  |                  |                              |                  |
| <i>Tnk1</i>      |                 |                  | <i>Tnk1</i>      |                              | <i>Tnk1</i>      |
| <i>Tnk2</i>      |                 | <i>Tnk2</i>      |                  |                              |                  |
| <i>Tnk2os</i>    |                 |                  | <i>Tnk2os</i>    |                              |                  |
| <i>Tnks1bp1</i>  |                 |                  | <i>Tnks1bp1</i>  |                              |                  |
| <i>Tnks2</i>     |                 |                  | <i>Tnks2</i>     |                              |                  |
| <i>Tnmd</i>      |                 | <i>Tnmd</i>      |                  |                              |                  |
| <i>Tnnc1</i>     | <i>Tnnc1</i>    |                  |                  |                              |                  |
| <i>Tnnc2</i>     |                 | <i>Tnnc2</i>     |                  |                              |                  |
| <i>Tnni2</i>     |                 | <i>Tnni2</i>     | <i>Tnni2</i>     |                              |                  |
| <i>Tnni3k</i>    | <i>Tnni3k</i>   | <i>Tnni3k</i>    | <i>Tnni3k</i>    |                              |                  |

Suppl. Table 1  
(211/234)

|                 | CHIP-Seq hits |          |          | Unique hits with interactors |        |
|-----------------|---------------|----------|----------|------------------------------|--------|
|                 | unstimulated  | Ac       | LPS      | Ac                           | LPS    |
| <i>Tnnt2</i>    | Tnnt2         |          |          |                              |        |
| <i>Tnp2</i>     |               | Tnp2     |          |                              |        |
| <i>Tnpo1</i>    |               |          | Tnpo1    |                              | Tnpo1  |
| <i>Tnpo2</i>    |               | Tnpo2    | Tnpo2    |                              |        |
| <i>Tnpo3</i>    |               |          | Tnpo3    |                              |        |
| <i>Tnr</i>      | Tnr           | Tnr      |          |                              |        |
| <i>Tnrc18</i>   |               | Tnrc18   | Tnrc18   |                              |        |
| <i>Tnrc6a</i>   | Tnrc6a        |          | Tnrc6a   |                              |        |
| <i>Tnrc6b</i>   |               |          | Tnrc6b   |                              | Tnrc6b |
| <i>Tns3</i>     |               | Tns3     |          |                              |        |
| <i>Tob1</i>     |               | Tob1     | Tob1     |                              |        |
| <i>Tob2</i>     |               |          | Tob2     |                              |        |
| <i>Toe1</i>     |               | Toe1     | Toe1     |                              |        |
| <i>Tom1</i>     |               | Tom1     |          |                              |        |
| <i>Tom1l1</i>   |               | Tom1l1   |          |                              |        |
| <i>Tomm22</i>   |               |          | Tomm22   |                              |        |
| <i>Tomm34</i>   | Tomm34        |          |          |                              |        |
| <i>Tomm70a</i>  |               | Tomm70a  |          |                              |        |
| <i>Tomt</i>     | Tomt          | Tomt     |          |                              |        |
| <i>Tonsl</i>    | Tonsl         |          | Tonsl    |                              |        |
| <i>Top2a</i>    |               | Top2a    | Top2a    |                              |        |
| <i>Top2b</i>    |               | Top2b    |          |                              |        |
| <i>Top3a</i>    |               | Top3a    | Top3a    |                              |        |
| <i>Topbp1</i>   |               |          | Topbp1   |                              |        |
| <i>Toporsl</i>  | Toporsl       |          |          |                              |        |
| <i>Toporsos</i> |               | Toporsos |          |                              |        |
| <i>Tor1aip1</i> | Tor1aip1      |          | Tor1aip1 |                              |        |
| <i>Tor1aip2</i> | Tor1aip2      | Tor1aip2 |          |                              |        |
| <i>Tor3a</i>    |               |          | Tor3a    |                              |        |
| <i>Tor4a</i>    |               |          | Tor4a    |                              |        |
| <i>Tox</i>      |               |          | Tox      |                              |        |
| <i>Tox2</i>     |               |          | Tox2     |                              |        |
| <i>Tox3</i>     |               | Tox3     |          |                              |        |
| <i>Tpbg</i>     |               |          | Tpbg     |                              |        |
| <i>Tpcn1</i>    |               | Tpcn1    |          | Tpcn1                        |        |
| <i>Tpd52l2</i>  | Tpd52l2       |          |          |                              |        |
| <i>Tpgs2</i>    |               | Tpgs2    | Tpgs2    |                              |        |
| <i>Tph2</i>     | Tph2          | Tph2     |          |                              |        |
| <i>Tpi1</i>     |               | Tpi1     |          |                              |        |
| <i>Tpm1</i>     |               | Tpm1     | Tpm1     |                              |        |
| <i>Tpm3</i>     |               | Tpm3     | Tpm3     |                              |        |
| <i>Tpm4</i>     |               | Tpm4     |          |                              |        |
| <i>Tppp2</i>    | Tppp2         | Tppp2    |          |                              |        |
| <i>Tpra1</i>    |               | Tpra1    |          |                              |        |
| <i>Tprg</i>     |               | Tprg     |          |                              |        |
| <i>Tprkb</i>    |               | Tprkb    | Tprkb    |                              |        |
| <i>Tprn</i>     |               | Tprn     |          |                              |        |
| <i>Tpte</i>     |               | Tpte     | Tpte     |                              |        |
| <i>Tra2a</i>    |               |          | Tra2a    |                              |        |

Suppl. Table 1  
(212/234)

|                 | CHIP-Seq hits |          |          | Unique hits with interactors |       |
|-----------------|---------------|----------|----------|------------------------------|-------|
|                 | unstimulated  | Ac       | LPS      | Ac                           | LPS   |
| <i>Trabd</i>    |               | Trabd    |          |                              |       |
| <i>Traf2</i>    | Traf2         |          |          |                              |       |
| <i>Traf3ip1</i> |               |          | Traf3ip1 |                              |       |
| <i>Traf5</i>    |               |          | Traf5    |                              |       |
| <i>Traf6</i>    |               | Traf6    | Traf6    |                              |       |
| <i>Traf7</i>    |               | Traf7    | Traf7    |                              |       |
| <i>Trak1</i>    |               | Trak1    |          | Trak1                        |       |
| <i>Tram1</i>    | Tram1         | Tram1    | Tram1    |                              |       |
| <i>Tram1l1</i>  |               | Tram1l1  | Tram1l1  |                              |       |
| <i>Tram2</i>    |               | Tram2    | Tram2    |                              |       |
| <i>Trap1</i>    |               |          | Trap1    |                              |       |
| <i>Trappc10</i> | Trappc10      |          |          |                              |       |
| <i>Trappc11</i> |               | Trappc11 |          |                              |       |
| <i>Trappc2l</i> |               |          | Trappc2l |                              |       |
| <i>Trappc3</i>  |               |          | Trappc3  |                              |       |
| <i>Trappc6a</i> |               | Trappc6a |          |                              |       |
| <i>Trappc8</i>  | Trappc8       |          |          |                              |       |
| <i>Trappc9</i>  |               | Trappc9  | Trappc9  |                              |       |
| <i>Trdmt1</i>   |               | Trdmt1   |          |                              |       |
| <i>Trdn</i>     |               | Trdn     |          |                              |       |
| <i>Treh</i>     |               | Treh     |          |                              |       |
| <i>Trem1</i>    | Trem1         |          |          |                              |       |
| <i>Trem3</i>    |               | Trem3    | Trem3    |                              |       |
| <i>Trem12</i>   |               |          | Trem12   |                              |       |
| <i>Trem14</i>   |               | Trem14   |          |                              |       |
| <i>Trerf1</i>   |               |          | Trerf1   |                              |       |
| <i>Trex1</i>    |               |          | Trex1    |                              | Trex1 |
| <i>Trhde</i>    | Trhde         | Trhde    | Trhde    |                              |       |
| <i>Trhr</i>     |               | Trhr     | Trhr     |                              |       |
| <i>Trhr2</i>    | Trhr2         |          |          |                              |       |
| <i>Triap1</i>   |               | Triap1   | Triap1   |                              |       |
| <i>Trib1</i>    |               |          | Trib1    |                              |       |
| <i>Trib3</i>    |               |          | Trib3    |                              |       |
| <i>Tril</i>     |               | Tril     | Tril     |                              |       |
| <i>Trim12a</i>  |               |          | Trim12a  |                              |       |
| <i>Trim13</i>   |               | Trim13   | Trim13   |                              |       |
| <i>Trim14</i>   |               | Trim14   | Trim14   |                              |       |
| <i>Trim16</i>   |               | Trim16   |          |                              |       |
| <i>Trim17</i>   |               |          | Trim17   |                              |       |
| <i>Trim25</i>   |               |          | Trim25   |                              |       |
| <i>Trim26</i>   |               |          | Trim26   |                              |       |
| <i>Trim28</i>   |               | Trim28   |          |                              |       |
| <i>Trim30a</i>  | Trim30a       |          |          |                              |       |
| <i>Trim30b</i>  |               | Trim30b  |          |                              |       |
| <i>Trim30d</i>  |               |          | Trim30d  |                              |       |
| <i>Trim32</i>   | Trim32        |          | Trim32   |                              |       |
| <i>Trim33</i>   |               |          | Trim33   |                              |       |
| <i>Trim34b</i>  |               |          | Trim34b  |                              |       |
| <i>Trim35</i>   |               |          | Trim35   |                              |       |

Suppl. Table 1  
(213/234)

|                  | ChIP-Seq hits    |                 |                  | Unique hits with interactors |               |
|------------------|------------------|-----------------|------------------|------------------------------|---------------|
|                  | unstimulated     | Ac              | LPS              | Ac                           | LPS           |
| <i>Trim36</i>    |                  |                 | <i>Trim36</i>    |                              | <i>Trim36</i> |
| <i>Trim37</i>    | <i>Trim37</i>    | <i>Trim37</i>   | <i>Trim37</i>    |                              |               |
| <i>Trim38</i>    |                  |                 | <i>Trim38</i>    |                              |               |
| <i>Trim40</i>    |                  | <i>Trim40</i>   |                  |                              |               |
| <i>Trim43a</i>   |                  |                 | <i>Trim43a</i>   |                              |               |
| <i>Trim43c</i>   |                  | <i>Trim43c</i>  | <i>Trim43c</i>   |                              |               |
| <i>Trim44</i>    |                  |                 | <i>Trim44</i>    |                              | <i>Trim44</i> |
| <i>Trim46</i>    |                  | <i>Trim46</i>   |                  |                              |               |
| <i>Trim54</i>    |                  | <i>Trim54</i>   |                  |                              |               |
| <i>Trim56</i>    |                  | <i>Trim56</i>   | <i>Trim56</i>    |                              |               |
| <i>Trim58</i>    |                  |                 | <i>Trim58</i>    |                              |               |
| <i>Trim59</i>    |                  | <i>Trim59</i>   | <i>Trim59</i>    |                              |               |
| <i>Trim60</i>    |                  |                 | <i>Trim60</i>    |                              | <i>Trim60</i> |
| <i>Trim61</i>    | <i>Trim61</i>    |                 |                  |                              |               |
| <i>Trim62</i>    |                  | <i>Trim62</i>   | <i>Trim62</i>    |                              |               |
| <i>Trim63</i>    |                  |                 | <i>Trim63</i>    |                              |               |
| <i>Trim66</i>    |                  |                 | <i>Trim66</i>    |                              |               |
| <i>Trim69</i>    | <i>Trim69</i>    |                 |                  |                              |               |
| <i>Trim7</i>     |                  | <i>Trim7</i>    |                  |                              |               |
| <i>Trim72</i>    |                  | <i>Trim72</i>   |                  | <i>Trim72</i>                |               |
| <i>Trim8</i>     | <i>Trim8</i>     |                 | <i>Trim8</i>     |                              |               |
| <i>Trim80</i>    |                  | <i>Trim80</i>   |                  |                              |               |
| <i>Trim9</i>     |                  | <i>Trim9</i>    |                  | <i>Trim9</i>                 |               |
| <i>Triml1</i>    |                  |                 | <i>Triml1</i>    |                              |               |
| <i>Triobp</i>    |                  | <i>Triobp</i>   | <i>Triobp</i>    |                              |               |
| <i>Trip10</i>    |                  |                 | <i>Trip10</i>    |                              | <i>Trip10</i> |
| <i>Trip11</i>    | <i>Trip11</i>    |                 |                  |                              |               |
| <i>Trip12</i>    | <i>Trip12</i>    | <i>Trip12</i>   | <i>Trip12</i>    |                              |               |
| <i>Trip4</i>     |                  |                 | <i>Trip4</i>     |                              | <i>Trip4</i>  |
| <i>Trip6</i>     | <i>Trip6</i>     |                 | <i>Trip6</i>     |                              |               |
| <i>Trit1</i>     | <i>Trit1</i>     | <i>Trit1</i>    | <i>Trit1</i>     |                              |               |
| <i>Trmt10a</i>   | <i>Trmt10a</i>   |                 |                  |                              |               |
| <i>Trmt10b</i>   | <i>Trmt10b</i>   |                 |                  |                              |               |
| <i>Trmt11</i>    |                  | <i>Trmt11</i>   |                  |                              |               |
| <i>Trmt112</i>   |                  | <i>Trmt112</i>  | <i>Trmt112</i>   |                              |               |
| <i>Trmt12</i>    |                  |                 | <i>Trmt12</i>    |                              |               |
| <i>Trmt1l</i>    |                  | <i>Trmt1l</i>   | <i>Trmt1l</i>    |                              |               |
| <i>Trmt2a</i>    |                  |                 | <i>Trmt2a</i>    |                              |               |
| <i>Trmt2b</i>    |                  | <i>Trmt2b</i>   |                  |                              |               |
| <i>Trmt61b</i>   |                  |                 | <i>Trmt61b</i>   |                              |               |
| <i>Trmu</i>      | <i>Trmu</i>      |                 |                  |                              |               |
| <i>Trnt1</i>     | <i>Trnt1</i>     | <i>Trnt1</i>    | <i>Trnt1</i>     |                              |               |
| <i>Trp53bp1</i>  |                  | <i>Trp53bp1</i> |                  |                              |               |
| <i>Trp53bp2</i>  | <i>Trp53bp2</i>  |                 |                  |                              |               |
| <i>Trp53cor1</i> |                  |                 | <i>Trp53cor1</i> |                              |               |
| <i>Trp53i11</i>  |                  | <i>Trp53i11</i> |                  | <i>Trp53i11</i>              |               |
| <i>Trp53i13</i>  |                  | <i>Trp53i13</i> |                  |                              |               |
| <i>Trp53inp2</i> | <i>Trp53inp2</i> |                 |                  |                              |               |
| <i>Trp53rkb</i>  |                  | <i>Trp53rkb</i> | <i>Trp53rkb</i>  |                              |               |

Suppl. Table 1  
(214/234)

|                 | CHIP-Seq hits  |                 |                 | Unique hits with interactors |                |
|-----------------|----------------|-----------------|-----------------|------------------------------|----------------|
|                 | unstimulated   | Ac              | LPS             | Ac                           | LPS            |
| <i>Trp53tg5</i> |                | <i>Trp53tg5</i> | <i>Trp53tg5</i> |                              |                |
| <i>Trp73</i>    | <i>Trp73</i>   |                 |                 |                              |                |
| <i>Trpa1</i>    | <i>Trpa1</i>   | <i>Trpa1</i>    | <i>Trpa1</i>    |                              |                |
| <i>Trpc2</i>    |                |                 | <i>Trpc2</i>    |                              |                |
| <i>Trpc4</i>    | <i>Trpc4</i>   |                 | <i>Trpc4</i>    |                              |                |
| <i>Trpc5os</i>  |                | <i>Trpc5os</i>  |                 |                              |                |
| <i>Trpc7</i>    |                | <i>Trpc7</i>    | <i>Trpc7</i>    |                              |                |
| <i>Trpm1</i>    | <i>Trpm1</i>   |                 |                 |                              |                |
| <i>Trpm3</i>    | <i>Trpm3</i>   |                 |                 |                              |                |
| <i>Trpm6</i>    |                | <i>Trpm6</i>    |                 |                              |                |
| <i>Trpm7</i>    |                |                 | <i>Trpm7</i>    |                              | <i>Trpm7</i>   |
| <i>Trps1</i>    |                |                 | <i>Trps1</i>    |                              | <i>Trps1</i>   |
| <i>Trpv1</i>    |                |                 | <i>Trpv1</i>    |                              |                |
| <i>Trpv2</i>    |                |                 | <i>Trpv2</i>    |                              |                |
| <i>Trpv3</i>    | <i>Trpv3</i>   | <i>Trpv3</i>    |                 |                              |                |
| <i>Trpv5</i>    | <i>Trpv5</i>   | <i>Trpv5</i>    | <i>Trpv5</i>    |                              |                |
| <i>Trpv6</i>    |                | <i>Trpv6</i>    | <i>Trpv6</i>    |                              |                |
| <i>Trrap</i>    | <i>Trrap</i>   |                 |                 |                              |                |
| <i>Trub1</i>    |                | <i>Trub1</i>    |                 | <i>Trub1</i>                 |                |
| <i>Trub2</i>    | <i>Trub2</i>   | <i>Trub2</i>    | <i>Trub2</i>    |                              |                |
| <i>Tsc2</i>     |                |                 | <i>Tsc2</i>     |                              |                |
| <i>Tsc22d1</i>  | <i>Tsc22d1</i> | <i>Tsc22d1</i>  |                 |                              |                |
| <i>Tsc22d2</i>  |                |                 | <i>Tsc22d2</i>  |                              |                |
| <i>Tsc22d4</i>  | <i>Tsc22d4</i> | <i>Tsc22d4</i>  | <i>Tsc22d4</i>  |                              |                |
| <i>Tsen15</i>   | <i>Tsen15</i>  |                 |                 |                              |                |
| <i>Tsg101</i>   | <i>Tsg101</i>  |                 |                 |                              |                |
| <i>Tsga10</i>   |                | <i>Tsga10</i>   |                 | <i>Tsga10</i>                |                |
| <i>Tshb</i>     |                |                 | <i>Tshb</i>     |                              |                |
| <i>Tshr</i>     |                |                 | <i>Tshr</i>     |                              |                |
| <i>Tshz1</i>    | <i>Tshz1</i>   | <i>Tshz1</i>    |                 |                              |                |
| <i>Tsix</i>     |                |                 | <i>Tsix</i>     |                              | <i>Tsix</i>    |
| <i>Tslp</i>     |                | <i>Tslp</i>     | <i>Tslp</i>     |                              |                |
| <i>Tsn</i>      |                | <i>Tsn</i>      | <i>Tsn</i>      |                              |                |
| <i>Tsnax</i>    |                |                 | <i>Tsnax</i>    |                              |                |
| <i>Tsnaxip1</i> |                |                 | <i>Tsnaxip1</i> |                              |                |
| <i>Tspan1</i>   |                |                 | <i>Tspan1</i>   |                              |                |
| <i>Tspan10</i>  |                |                 | <i>Tspan10</i>  |                              |                |
| <i>Tspan12</i>  |                |                 | <i>Tspan12</i>  |                              | <i>Tspan12</i> |
| <i>Tspan13</i>  |                |                 | <i>Tspan13</i>  |                              |                |
| <i>Tspan31</i>  | <i>Tspan31</i> | <i>Tspan31</i>  | <i>Tspan31</i>  |                              |                |
| <i>Tspan32</i>  | <i>Tspan32</i> |                 | <i>Tspan32</i>  |                              |                |
| <i>Tspan33</i>  |                | <i>Tspan33</i>  |                 |                              |                |
| <i>Tspan5</i>   | <i>Tspan5</i>  |                 |                 |                              |                |
| <i>Tspan8</i>   |                | <i>Tspan8</i>   | <i>Tspan8</i>   |                              |                |
| <i>Tspan9</i>   | <i>Tspan9</i>  |                 | <i>Tspan9</i>   |                              |                |
| <i>Tspo</i>     | <i>Tspo</i>    | <i>Tspo</i>     |                 |                              |                |
| <i>Tspy-ps</i>  |                |                 | <i>Tspy-ps</i>  |                              |                |
| <i>Tsr1</i>     |                | <i>Tsr1</i>     | <i>Tsr1</i>     |                              |                |
| <i>Tsr2</i>     | <i>Tsr2</i>    | <i>Tsr2</i>     | <i>Tsr2</i>     |                              |                |

Suppl. Table 1  
(215/234)

|                | CHIP-Seq hits  |               |                | Unique hits with interactors |              |
|----------------|----------------|---------------|----------------|------------------------------|--------------|
|                | unstimulated   | Ac            | LPS            | Ac                           | LPS          |
| <i>Tssc4</i>   |                | <i>Tssc4</i>  |                |                              |              |
| <i>Tssk1</i>   | <i>Tssk1</i>   | <i>Tssk1</i>  |                |                              |              |
| <i>Tssk6</i>   | <i>Tssk6</i>   | <i>Tssk6</i>  | <i>Tssk6</i>   |                              |              |
| <i>Tstd1</i>   |                |               | <i>Tstd1</i>   |                              |              |
| <i>Tstd2</i>   |                |               | <i>Tstd2</i>   |                              | <i>Tstd2</i> |
| <i>Tstd3</i>   | <i>Tstd3</i>   |               |                |                              |              |
| <i>Tsx</i>     |                |               | <i>Tsx</i>     |                              |              |
| <i>Ttbk2</i>   |                | <i>Ttbk2</i>  |                |                              |              |
| <i>Ttc13</i>   | <i>Ttc13</i>   |               |                |                              |              |
| <i>Ttc14</i>   |                |               | <i>Ttc14</i>   |                              | <i>Ttc14</i> |
| <i>Ttc16</i>   |                | <i>Ttc16</i>  |                |                              |              |
| <i>Ttc19</i>   |                |               | <i>Ttc19</i>   |                              |              |
| <i>Ttc21a</i>  | <i>Ttc21a</i>  |               |                |                              |              |
| <i>Ttc21b</i>  | <i>Ttc21b</i>  |               |                |                              |              |
| <i>Ttc22</i>   |                |               | <i>Ttc22</i>   |                              |              |
| <i>Ttc23</i>   | <i>Ttc23</i>   | <i>Ttc23</i>  |                |                              |              |
| <i>Ttc24</i>   | <i>Ttc24</i>   |               |                |                              |              |
| <i>Ttc25</i>   | <i>Ttc25</i>   | <i>Ttc25</i>  | <i>Ttc25</i>   |                              |              |
| <i>Ttc26</i>   |                |               | <i>Ttc26</i>   |                              | <i>Ttc26</i> |
| <i>Ttc27</i>   |                | <i>Ttc27</i>  |                |                              |              |
| <i>Ttc28</i>   |                |               | <i>Ttc28</i>   |                              |              |
| <i>Ttc29</i>   |                | <i>Ttc29</i>  |                |                              |              |
| <i>Ttc3</i>    |                | <i>Ttc3</i>   | <i>Ttc3</i>    |                              |              |
| <i>Ttc30a1</i> | <i>Ttc30a1</i> |               | <i>Ttc30a1</i> |                              |              |
| <i>Ttc30b</i>  |                | <i>Ttc30b</i> |                |                              |              |
| <i>Ttc32</i>   |                | <i>Ttc32</i>  |                |                              |              |
| <i>Ttc36</i>   |                |               | <i>Ttc36</i>   |                              |              |
| <i>Ttc38</i>   |                |               | <i>Ttc38</i>   |                              | <i>Ttc38</i> |
| <i>Ttc39c</i>  |                |               | <i>Ttc39c</i>  |                              |              |
| <i>Ttc41</i>   |                | <i>Ttc41</i>  |                |                              |              |
| <i>Ttc8</i>    | <i>Ttc8</i>    |               |                |                              |              |
| <i>Ttc9b</i>   | <i>Ttc9b</i>   | <i>Ttc9b</i>  | <i>Ttc9b</i>   |                              |              |
| <i>Ttc9c</i>   |                |               | <i>Ttc9c</i>   |                              | <i>Ttc9c</i> |
| <i>Ttf1</i>    |                | <i>Ttf1</i>   |                | <i>Ttf1</i>                  |              |
| <i>Ttf2</i>    |                |               | <i>Ttf2</i>    |                              |              |
| <i>Tti1</i>    |                | <i>Tti1</i>   |                |                              |              |
| <i>Tti2</i>    |                | <i>Tti2</i>   | <i>Tti2</i>    |                              |              |
| <i>Ttll1</i>   | <i>Ttll1</i>   | <i>Ttll1</i>  |                |                              |              |
| <i>Ttll11</i>  |                |               | <i>Ttll11</i>  |                              |              |
| <i>Ttll12</i>  |                | <i>Ttll12</i> | <i>Ttll12</i>  |                              |              |
| <i>Ttll3</i>   |                |               | <i>Ttll3</i>   |                              |              |
| <i>Ttll9</i>   | <i>Ttll9</i>   |               | <i>Ttll9</i>   |                              |              |
| <i>Ttpal</i>   |                | <i>Ttpal</i>  |                |                              |              |
| <i>Ttyh1</i>   |                |               | <i>Ttyh1</i>   |                              | <i>Ttyh1</i> |
| <i>Ttyh2</i>   |                | <i>Ttyh2</i>  |                |                              |              |
| <i>Tuba1b</i>  |                |               | <i>Tuba1b</i>  |                              |              |
| <i>Tuba1c</i>  |                |               | <i>Tuba1c</i>  |                              |              |
| <i>Tuba3a</i>  | <i>Tuba3a</i>  |               |                |                              |              |
| <i>Tuba4a</i>  |                | <i>Tuba4a</i> |                |                              |              |

Suppl. Table 1  
(216/234)

|                   | ChIP-Seq hits     |                |                | Unique hits with interactors |               |
|-------------------|-------------------|----------------|----------------|------------------------------|---------------|
|                   | unstimulated      | Ac             | LPS            | Ac                           | LPS           |
| <i>Tubb2a-ps2</i> | <i>Tubb2a-ps2</i> |                |                |                              |               |
| <i>Tubb2b</i>     |                   |                | <i>Tubb2b</i>  |                              |               |
| <i>Tubb3</i>      | <i>Tubb3</i>      | <i>Tubb3</i>   | <i>Tubb3</i>   |                              |               |
| <i>Tubb5</i>      |                   | <i>Tubb5</i>   |                | <i>Tubb5</i>                 |               |
| <i>Tubb6</i>      |                   | <i>Tubb6</i>   |                |                              |               |
| <i>Tubd1</i>      |                   | <i>Tubd1</i>   |                |                              |               |
| <i>Tube1</i>      |                   | <i>Tube1</i>   |                |                              |               |
| <i>Tubg1</i>      |                   |                | <i>Tubg1</i>   |                              |               |
| <i>Tubg2</i>      |                   |                | <i>Tubg2</i>   |                              |               |
| <i>Tubgcp2</i>    |                   | <i>Tubgcp2</i> | <i>Tubgcp2</i> |                              |               |
| <i>Tubgcp3</i>    |                   |                | <i>Tubgcp3</i> |                              |               |
| <i>Tubgcp4</i>    |                   |                | <i>Tubgcp4</i> |                              |               |
| <i>Tubgcp5</i>    | <i>Tubgcp5</i>    |                | <i>Tubgcp5</i> |                              |               |
| <i>Tufm</i>       | <i>Tufm</i>       |                |                |                              |               |
| <i>Tug1</i>       | <i>Tug1</i>       | <i>Tug1</i>    | <i>Tug1</i>    |                              |               |
| <i>Tulp1</i>      |                   |                | <i>Tulp1</i>   |                              |               |
| <i>Tulp2</i>      |                   |                | <i>Tulp2</i>   |                              |               |
| <i>Tulp3</i>      | <i>Tulp3</i>      | <i>Tulp3</i>   | <i>Tulp3</i>   |                              |               |
| <i>Tulp4</i>      |                   | <i>Tulp4</i>   | <i>Tulp4</i>   |                              |               |
| <i>Tusc2</i>      |                   | <i>Tusc2</i>   |                |                              |               |
| <i>Tusc5</i>      | <i>Tusc5</i>      |                |                |                              |               |
| <i>Tut1</i>       |                   | <i>Tut1</i>    | <i>Tut1</i>    |                              |               |
| <i>Tvp23a</i>     |                   |                | <i>Tvp23a</i>  |                              |               |
| <i>Twf1</i>       |                   |                | <i>Twf1</i>    |                              | <i>Twf1</i>   |
| <i>Twist1</i>     |                   | <i>Twist1</i>  | <i>Twist1</i>  |                              |               |
| <i>Twist2</i>     |                   | <i>Twist2</i>  |                | <i>Twist2</i>                |               |
| <i>Txk</i>        |                   |                | <i>Txk</i>     |                              |               |
| <i>Txlna</i>      |                   | <i>Txlna</i>   |                |                              |               |
| <i>Txlng</i>      |                   |                | <i>Txlng</i>   |                              | <i>Txlng</i>  |
| <i>Txn1</i>       |                   | <i>Txn1</i>    |                |                              |               |
| <i>Txn2</i>       | <i>Txn2</i>       | <i>Txn2</i>    |                |                              |               |
| <i>Txndc11</i>    | <i>Txndc11</i>    | <i>Txndc11</i> |                |                              |               |
| <i>Txndc12</i>    | <i>Txndc12</i>    | <i>Txndc12</i> | <i>Txndc12</i> |                              |               |
| <i>Txndc15</i>    |                   |                | <i>Txndc15</i> |                              |               |
| <i>Txndc16</i>    |                   | <i>Txndc16</i> |                |                              |               |
| <i>Txndc17</i>    |                   | <i>Txndc17</i> |                |                              |               |
| <i>Txndc5</i>     |                   | <i>Txndc5</i>  |                |                              |               |
| <i>Txndc8</i>     |                   |                | <i>Txndc8</i>  |                              |               |
| <i>Txndc9</i>     |                   |                | <i>Txndc9</i>  |                              |               |
| <i>Txnl4a</i>     |                   |                | <i>Txnl4a</i>  |                              | <i>Txnl4a</i> |
| <i>Txnl4b</i>     |                   |                | <i>Txnl4b</i>  |                              |               |
| <i>Txnrd1</i>     |                   |                | <i>Txnrd1</i>  |                              |               |
| <i>Txnrd2</i>     |                   |                | <i>Txnrd2</i>  |                              |               |
| <i>Tyk2</i>       |                   | <i>Tyk2</i>    | <i>Tyk2</i>    |                              |               |
| <i>Tyms-ps</i>    |                   |                | <i>Tyms-ps</i> |                              |               |
| <i>Tyr</i>        | <i>Tyr</i>        | <i>Tyr</i>     |                |                              |               |
| <i>Tyrobp</i>     |                   | <i>Tyrobp</i>  |                |                              |               |
| <i>Tyrp1</i>      | <i>Tyrp1</i>      |                |                |                              |               |
| <i>Tysnd1</i>     |                   | <i>Tysnd1</i>  |                |                              |               |



Suppl. Table 1  
(217/234)

|                 | CHIP-Seq hits   |                 |                | Unique hits with interactors |              |
|-----------------|-----------------|-----------------|----------------|------------------------------|--------------|
|                 | unstimulated    | Ac              | LPS            | Ac                           | LPS          |
| <i>Tyw1</i>     |                 | <i>Tyw1</i>     | <i>Tyw1</i>    |                              |              |
| <i>Tyw5</i>     | <i>Tyw5</i>     |                 | <i>Tyw5</i>    |                              |              |
| <i>U2af1l4</i>  | <i>U2af1l4</i>  | <i>U2af1l4</i>  | <i>U2af1l4</i> |                              |              |
| <i>U2surp</i>   |                 | <i>U2surp</i>   | <i>U2surp</i>  |                              |              |
| <i>U90926</i>   | <i>U90926</i>   |                 | <i>U90926</i>  |                              |              |
| <i>Uap1</i>     |                 | <i>Uap1</i>     | <i>Uap1</i>    |                              |              |
| <i>Uap1l1</i>   |                 |                 | <i>Uap1l1</i>  |                              |              |
| <i>Uba1</i>     | <i>Uba1</i>     |                 |                |                              |              |
| <i>Uba1y</i>    |                 |                 | <i>Uba1y</i>   |                              | <i>Uba1y</i> |
| <i>Uba3</i>     |                 | <i>Uba3</i>     | <i>Uba3</i>    |                              |              |
| <i>Uba52</i>    |                 |                 | <i>Uba52</i>   |                              |              |
| <i>Uba6</i>     |                 |                 | <i>Uba6</i>    |                              |              |
| <i>Uba7</i>     |                 |                 | <i>Uba7</i>    |                              |              |
| <i>Ubac1</i>    | <i>Ubac1</i>    | <i>Ubac1</i>    |                |                              |              |
| <i>Ubald1</i>   | <i>Ubald1</i>   |                 | <i>Ubald1</i>  |                              |              |
| <i>Ubald2</i>   |                 |                 | <i>Ubald2</i>  |                              |              |
| <i>Ubap1</i>    |                 |                 | <i>Ubap1</i>   |                              |              |
| <i>Ubap1l</i>   | <i>Ubap1l</i>   | <i>Ubap1l</i>   |                |                              |              |
| <i>Ubap2</i>    |                 | <i>Ubap2</i>    |                | <i>Ubap2</i>                 |              |
| <i>Ubap2l</i>   |                 | <i>Ubap2l</i>   | <i>Ubap2l</i>  |                              |              |
| <i>Ubash3a</i>  |                 | <i>Ubash3a</i>  | <i>Ubash3a</i> |                              |              |
| <i>Ubb</i>      |                 | <i>Ubb</i>      | <i>Ubb</i>     |                              |              |
| <i>Ubd</i>      |                 |                 | <i>Ubd</i>     |                              |              |
| <i>Ube2a</i>    |                 |                 | <i>Ube2a</i>   |                              |              |
| <i>Ube2b</i>    | <i>Ube2b</i>    |                 | <i>Ube2b</i>   |                              |              |
| <i>Ube2c</i>    |                 |                 | <i>Ube2c</i>   |                              |              |
| <i>Ube2cbp</i>  | <i>Ube2cbp</i>  | <i>Ube2cbp</i>  | <i>Ube2cbp</i> |                              |              |
| <i>Ube2d1</i>   | <i>Ube2d1</i>   |                 |                |                              |              |
| <i>Ube2d2a</i>  |                 |                 | <i>Ube2d2a</i> |                              |              |
| <i>Ube2d2b</i>  |                 |                 | <i>Ube2d2b</i> |                              |              |
| <i>Ube2d3</i>   |                 | <i>Ube2d3</i>   |                |                              |              |
| <i>Ube2dnl1</i> | <i>Ube2dnl1</i> | <i>Ube2dnl1</i> |                |                              |              |
| <i>Ube2dnl2</i> | <i>Ube2dnl2</i> | <i>Ube2dnl2</i> |                |                              |              |
| <i>Ube2e1</i>   |                 |                 | <i>Ube2e1</i>  |                              |              |
| <i>Ube2e2</i>   |                 |                 | <i>Ube2e2</i>  |                              |              |
| <i>Ube2g1</i>   |                 | <i>Ube2g1</i>   | <i>Ube2g1</i>  |                              |              |
| <i>Ube2g2</i>   | <i>Ube2g2</i>   | <i>Ube2g2</i>   | <i>Ube2g2</i>  |                              |              |
| <i>Ube2h</i>    |                 | <i>Ube2h</i>    | <i>Ube2h</i>   |                              |              |
| <i>Ube2j1</i>   |                 | <i>Ube2j1</i>   |                |                              |              |
| <i>Ube2m</i>    |                 | <i>Ube2m</i>    |                |                              |              |
| <i>Ube2n</i>    | <i>Ube2n</i>    |                 |                |                              |              |
| <i>Ube2o</i>    |                 | <i>Ube2o</i>    |                |                              |              |
| <i>Ube2q2</i>   |                 |                 | <i>Ube2q2</i>  |                              |              |
| <i>Ube2ql1</i>  |                 | <i>Ube2ql1</i>  |                |                              |              |
| <i>Ube2r2</i>   |                 |                 | <i>Ube2r2</i>  |                              |              |
| <i>Ube2t</i>    |                 | <i>Ube2t</i>    |                |                              |              |
| <i>Ube2v1</i>   |                 |                 | <i>Ube2v1</i>  |                              |              |
| <i>Ube3a</i>    |                 | <i>Ube3a</i>    | <i>Ube3a</i>   |                              |              |
| <i>Ube3c</i>    |                 | <i>Ube3c</i>    |                |                              |              |

Suppl. Table 1  
(218/234)

|                 | CHIP-Seq hits  |                 |                 | Unique hits with interactors |             |
|-----------------|----------------|-----------------|-----------------|------------------------------|-------------|
|                 | unstimulated   | Ac              | LPS             | Ac                           | LPS         |
| <i>Ube4bos3</i> |                | <i>Ube4bos3</i> | <i>Ube4bos3</i> |                              |             |
| <i>Ubl3</i>     | <i>Ubl3</i>    |                 |                 |                              |             |
| <i>Ubl4b</i>    |                | <i>Ubl4b</i>    |                 |                              |             |
| <i>Ubl5</i>     | <i>Ubl5</i>    |                 | <i>Ubl5</i>     |                              |             |
| <i>Ubn2</i>     |                | <i>Ubn2</i>     | <i>Ubn2</i>     |                              |             |
| <i>Ubqln2</i>   | <i>Ubqln2</i>  |                 |                 |                              |             |
| <i>Ubqln3</i>   |                |                 | <i>Ubqln3</i>   |                              |             |
| <i>Ubqln4</i>   |                | <i>Ubqln4</i>   |                 |                              |             |
| <i>Ubr3</i>     |                |                 | <i>Ubr3</i>     |                              | <i>Ubr3</i> |
| <i>Ubr4</i>     |                | <i>Ubr4</i>     |                 |                              |             |
| <i>Ubr7</i>     |                | <i>Ubr7</i>     |                 |                              |             |
| <i>Ubt1</i>     | <i>Ubt1</i>    |                 |                 |                              |             |
| <i>Ubt2</i>     |                |                 | <i>Ubt2</i>     |                              |             |
| <i>Ubx1</i>     |                |                 | <i>Ubx1</i>     |                              |             |
| <i>Ubx11</i>    | <i>Ubx11</i>   |                 |                 |                              |             |
| <i>Ubx7</i>     |                |                 | <i>Ubx7</i>     |                              |             |
| <i>Uchl1</i>    | <i>Uchl1</i>   | <i>Uchl1</i>    |                 |                              |             |
| <i>Uchl1os</i>  |                | <i>Uchl1os</i>  |                 |                              |             |
| <i>Uchl4</i>    |                |                 | <i>Uchl4</i>    |                              |             |
| <i>Uck1</i>     |                |                 | <i>Uck1</i>     |                              |             |
| <i>Uck2</i>     |                | <i>Uck2</i>     | <i>Uck2</i>     |                              |             |
| <i>Uck11</i>    |                |                 | <i>Uck11</i>    |                              |             |
| <i>Ucn</i>      |                | <i>Ucn</i>      | <i>Ucn</i>      |                              |             |
| <i>Ucp3</i>     |                | <i>Ucp3</i>     |                 | <i>Ucp3</i>                  |             |
| <i>Ufd1l</i>    | <i>Ufd1l</i>   |                 |                 |                              |             |
| <i>Ufl1</i>     |                | <i>Ufl1</i>     |                 |                              |             |
| <i>Ufm1</i>     |                |                 | <i>Ufm1</i>     |                              |             |
| <i>Ufsp1</i>    |                |                 | <i>Ufsp1</i>    |                              |             |
| <i>Ufsp2</i>    |                | <i>Ufsp2</i>    | <i>Ufsp2</i>    |                              |             |
| <i>Ugcg</i>     | <i>Ugcg</i>    |                 | <i>Ugcg</i>     |                              |             |
| <i>Uggt1</i>    |                |                 | <i>Uggt1</i>    |                              |             |
| <i>Ugp2</i>     |                | <i>Ugp2</i>     | <i>Ugp2</i>     |                              |             |
| <i>Ugt1a10</i>  | <i>Ugt1a10</i> |                 |                 |                              |             |
| <i>Ugt1a6a</i>  | <i>Ugt1a6a</i> |                 | <i>Ugt1a6a</i>  |                              |             |
| <i>Ugt1a7c</i>  |                | <i>Ugt1a7c</i>  |                 |                              |             |
| <i>Ugt1a9</i>   | <i>Ugt1a9</i>  | <i>Ugt1a9</i>   |                 |                              |             |
| <i>Ugt2a1</i>   |                | <i>Ugt2a1</i>   | <i>Ugt2a1</i>   |                              |             |
| <i>Ugt2a2</i>   |                |                 | <i>Ugt2a2</i>   |                              |             |
| <i>Ugt2a3</i>   |                |                 | <i>Ugt2a3</i>   |                              |             |
| <i>Ugt2b1</i>   |                |                 | <i>Ugt2b1</i>   |                              |             |
| <i>Ugt2b35</i>  |                | <i>Ugt2b35</i>  |                 | <i>Ugt2b35</i>               |             |
| <i>Ugt2b36</i>  |                |                 | <i>Ugt2b36</i>  |                              |             |
| <i>Ugt2b37</i>  |                |                 | <i>Ugt2b37</i>  |                              |             |
| <i>Ugt2b38</i>  |                | <i>Ugt2b38</i>  |                 |                              |             |
| <i>Ugt3a1</i>   |                | <i>Ugt3a1</i>   |                 |                              |             |
| <i>Uhrf1</i>    | <i>Uhrf1</i>   | <i>Uhrf1</i>    | <i>Uhrf1</i>    |                              |             |
| <i>Uhrf2</i>    |                | <i>Uhrf2</i>    |                 |                              |             |
| <i>Uimc1</i>    | <i>Uimc1</i>   | <i>Uimc1</i>    | <i>Uimc1</i>    |                              |             |
| <i>Ul1</i>      |                | <i>Ul1</i>      |                 |                              |             |

Suppl. Table 1  
(219/234)

|                | CHIP-Seq hits |         |         | Unique hits with interactors |      |
|----------------|---------------|---------|---------|------------------------------|------|
|                | unstimulated  | Ac      | LPS     | Ac                           | LPS  |
| <i>Ulk2</i>    |               |         | Ulk2    |                              |      |
| <i>Umad1</i>   |               |         | Umad1   |                              |      |
| <i>Umodl1</i>  |               |         | Umodl1  |                              |      |
| <i>Umps</i>    | Umps          | Umps    | Umps    |                              |      |
| <i>Unc119</i>  |               | Unc119  |         |                              |      |
| <i>Unc119b</i> |               |         | Unc119b |                              |      |
| <i>Unc13b</i>  | Unc13b        | Unc13b  |         |                              |      |
| <i>Unc13d</i>  |               | Unc13d  | Unc13d  |                              |      |
| <i>Unc45b</i>  | Unc45b        |         |         |                              |      |
| <i>Unc50</i>   | Unc50         |         |         |                              |      |
| <i>Unc5a</i>   |               |         | Unc5a   |                              |      |
| <i>Unc5b</i>   |               | Unc5b   |         | Unc5b                        |      |
| <i>Unc5c</i>   |               | Unc5c   |         | Unc5c                        |      |
| <i>Unc5cl</i>  |               |         | Unc5cl  |                              |      |
| <i>Unc79</i>   |               |         | Unc79   |                              |      |
| <i>Unc93b1</i> | Unc93b1       |         | Unc93b1 |                              |      |
| <i>Ung</i>     | Ung           | Ung     | Ung     |                              |      |
| <i>Unk</i>     |               |         | Unk     |                              |      |
| <i>Unkl</i>    | Unkl          |         | Unkl    |                              |      |
| <i>Upf2</i>    |               | Upf2    |         |                              |      |
| <i>Upk2</i>    |               | Upk2    | Upk2    |                              |      |
| <i>Upk3bl</i>  |               | Upk3bl  |         |                              |      |
| <i>Upp1</i>    |               |         | Upp1    |                              | Upp1 |
| <i>Upp2</i>    |               |         | Upp2    |                              |      |
| <i>Uprt</i>    | Uprt          |         |         |                              |      |
| <i>Uqcc1</i>   |               | Uqcc1   | Uqcc1   |                              |      |
| <i>Uqcc3</i>   | Uqcc3         |         |         |                              |      |
| <i>Uqcr10</i>  | Uqcr10        | Uqcr10  |         |                              |      |
| <i>Uqcrb</i>   | Uqcrb         | Uqcrb   |         |                              |      |
| <i>Uqcrc1</i>  | Uqcrc1        |         |         |                              |      |
| <i>Uqcrc2</i>  |               |         | Uqcrc2  |                              |      |
| <i>Uqcrfs1</i> |               | Uqcrfs1 |         |                              |      |
| <i>Uqcrq</i>   |               | Uqcrq   | Uqcrq   |                              |      |
| <i>Urad</i>    |               |         | Urad    |                              |      |
| <i>Urah</i>    | Urah          | Urah    |         |                              |      |
| <i>Urb2</i>    |               |         | Urb2    |                              | Urb2 |
| <i>Urgcp</i>   |               |         | Urgcp   |                              |      |
| <i>Urm1</i>    | Urm1          |         |         |                              |      |
| <i>Urod</i>    |               | Urod    | Urod    |                              |      |
| <i>Uros</i>    |               | Uros    | Uros    |                              |      |
| <i>Usf2</i>    |               | Usf2    | Usf2    |                              |      |
| <i>Ush1g</i>   |               | Ush1g   |         |                              |      |
| <i>Ush2a</i>   |               | Ush2a   |         |                              |      |
| <i>Ushbp1</i>  |               | Ushbp1  |         |                              |      |
| <i>Usp1</i>    |               | Usp1    | Usp1    |                              |      |
| <i>Usp10</i>   | Usp10         | Usp10   | Usp10   |                              |      |
| <i>Usp13</i>   | Usp13         |         |         |                              |      |
| <i>Usp17ld</i> |               |         | Usp17ld |                              |      |
| <i>Usp17le</i> |               | Usp17le |         |                              |      |

Suppl. Table 1  
(220/234)

|                 | CHIP-Seq hits |          |          | Unique hits with interactors |       |
|-----------------|---------------|----------|----------|------------------------------|-------|
|                 | unstimulated  | Ac       | LPS      | Ac                           | LPS   |
| <i>Usp18</i>    |               | Usp18    |          | Usp18                        |       |
| <i>Usp2</i>     |               |          | Usp2     |                              | Usp2  |
| <i>Usp20</i>    |               | Usp20    |          |                              |       |
| <i>Usp21</i>    | Usp21         | Usp21    |          |                              |       |
| <i>Usp22</i>    |               | Usp22    | Usp22    |                              |       |
| <i>Usp24</i>    |               |          | Usp24    |                              |       |
| <i>Usp29</i>    |               | Usp29    | Usp29    |                              |       |
| <i>Usp3</i>     |               | Usp3     | Usp3     |                              |       |
| <i>Usp31</i>    | Usp31         |          |          |                              |       |
| <i>Usp33</i>    |               |          | Usp33    |                              | Usp33 |
| <i>Usp34</i>    |               |          | Usp34    |                              |       |
| <i>Usp36</i>    |               | Usp36    |          |                              |       |
| <i>Usp37</i>    |               |          | Usp37    |                              |       |
| <i>Usp4</i>     | Usp4          | Usp4     | Usp4     |                              |       |
| <i>Usp43</i>    |               | Usp43    |          |                              |       |
| <i>Usp44</i>    |               |          | Usp44    |                              |       |
| <i>Usp45</i>    | Usp45         |          |          |                              |       |
| <i>Usp46</i>    |               |          | Usp46    |                              |       |
| <i>Usp48</i>    |               | Usp48    | Usp48    |                              |       |
| <i>Usp5</i>     | Usp5          |          | Usp5     |                              |       |
| <i>Usp53</i>    | Usp53         | Usp53    |          |                              |       |
| <i>Usp54</i>    |               |          | Usp54    |                              |       |
| <i>Usp6nl</i>   | Usp6nl        |          |          |                              |       |
| <i>Usp9x</i>    |               | Usp9x    | Usp9x    |                              |       |
| <i>Usp9y</i>    |               |          | Usp9y    |                              |       |
| <i>Usp11</i>    |               | Usp11    | Usp11    |                              |       |
| <i>Ust</i>      |               | Ust      |          |                              |       |
| <i>Utp14a</i>   |               |          | Utp14a   |                              |       |
| <i>Utp18</i>    |               |          | Utp18    |                              |       |
| <i>Utp23</i>    | Utp23         | Utp23    | Utp23    |                              |       |
| <i>Utp3</i>     |               |          | Utp3     |                              |       |
| <i>Utp6</i>     |               |          | Utp6     |                              | Utp6  |
| <i>Uts2</i>     | Uts2          |          |          |                              |       |
| <i>Uty</i>      |               | Uty      |          | Uty                          |       |
| <i>Uvrag</i>    |               | Uvrag    |          | Uvrag                        |       |
| <i>Vamp3</i>    |               |          | Vamp3    |                              | Vamp3 |
| <i>Vapb</i>     |               | Vapb     |          |                              |       |
| <i>Vars</i>     |               | Vars     | Vars     |                              |       |
| <i>Vat1l</i>    |               | Vat1l    |          |                              |       |
| <i>Vaultrc5</i> |               | Vaultrc5 | Vaultrc5 |                              |       |
| <i>Vav1</i>     | Vav1          |          |          |                              |       |
| <i>Vax2os</i>   |               | Vax2os   | Vax2os   |                              |       |
| <i>Vcl</i>      |               | Vcl      | Vcl      |                              |       |
| <i>Vdac1</i>    |               | Vdac1    | Vdac1    |                              |       |
| <i>Vdac3</i>    |               |          | Vdac3    |                              |       |
| <i>Vdr</i>      | Vdr           | Vdr      | Vdr      |                              |       |
| <i>Vegfa</i>    | Vegfa         |          |          |                              |       |
| <i>Vegfc</i>    |               | Vegfc    |          |                              |       |
| <i>VeZF1</i>    | VeZF1         | VeZF1    | VeZF1    |                              |       |

Suppl. Table 1  
(221/234)

|                 | CHIP-Seq hits   |                 |                 | Unique hits with interactors |             |
|-----------------|-----------------|-----------------|-----------------|------------------------------|-------------|
|                 | unstimulated    | Ac              | LPS             | Ac                           | LPS         |
| <i>Vgf</i>      |                 |                 | <i>Vgf</i>      |                              |             |
| <i>Vgll2</i>    |                 |                 | <i>Vgll2</i>    |                              |             |
| <i>Vgll3</i>    |                 |                 | <i>Vgll3</i>    |                              |             |
| <i>Vgll4</i>    |                 |                 | <i>Vgll4</i>    |                              |             |
| <i>Vhl</i>      | <i>Vhl</i>      | <i>Vhl</i>      |                 |                              |             |
| <i>Vill</i>     |                 | <i>Vill</i>     |                 |                              |             |
| <i>Vim</i>      |                 | <i>Vim</i>      |                 | <i>Vim</i>                   |             |
| <i>Vimp</i>     |                 |                 | <i>Vimp</i>     |                              | <i>Vimp</i> |
| <i>Vip</i>      |                 |                 | <i>Vip</i>      |                              |             |
| <i>Vipas39</i>  | <i>Vipas39</i>  |                 |                 |                              |             |
| <i>Vmn1r1</i>   | <i>Vmn1r1</i>   | <i>Vmn1r1</i>   | <i>Vmn1r1</i>   |                              |             |
| <i>Vmn1r101</i> |                 | <i>Vmn1r101</i> |                 |                              |             |
| <i>Vmn1r103</i> |                 | <i>Vmn1r103</i> | <i>Vmn1r103</i> |                              |             |
| <i>Vmn1r104</i> |                 | <i>Vmn1r104</i> | <i>Vmn1r104</i> |                              |             |
| <i>Vmn1r107</i> |                 | <i>Vmn1r107</i> |                 |                              |             |
| <i>Vmn1r11</i>  |                 |                 | <i>Vmn1r11</i>  |                              |             |
| <i>Vmn1r111</i> |                 | <i>Vmn1r111</i> |                 |                              |             |
| <i>Vmn1r113</i> |                 |                 | <i>Vmn1r113</i> |                              |             |
| <i>Vmn1r116</i> |                 | <i>Vmn1r116</i> |                 |                              |             |
| <i>Vmn1r118</i> |                 | <i>Vmn1r118</i> |                 |                              |             |
| <i>Vmn1r12</i>  |                 | <i>Vmn1r12</i>  | <i>Vmn1r12</i>  |                              |             |
| <i>Vmn1r128</i> |                 | <i>Vmn1r128</i> |                 |                              |             |
| <i>Vmn1r13</i>  |                 | <i>Vmn1r13</i>  |                 |                              |             |
| <i>Vmn1r130</i> |                 | <i>Vmn1r130</i> |                 |                              |             |
| <i>Vmn1r131</i> |                 | <i>Vmn1r131</i> |                 |                              |             |
| <i>Vmn1r132</i> | <i>Vmn1r132</i> |                 |                 |                              |             |
| <i>Vmn1r137</i> |                 | <i>Vmn1r137</i> |                 |                              |             |
| <i>Vmn1r138</i> |                 | <i>Vmn1r138</i> |                 |                              |             |
| <i>Vmn1r139</i> | <i>Vmn1r139</i> |                 |                 |                              |             |
| <i>Vmn1r143</i> |                 | <i>Vmn1r143</i> |                 |                              |             |
| <i>Vmn1r149</i> |                 | <i>Vmn1r149</i> |                 |                              |             |
| <i>Vmn1r15</i>  |                 | <i>Vmn1r15</i>  |                 |                              |             |
| <i>Vmn1r151</i> |                 | <i>Vmn1r151</i> | <i>Vmn1r151</i> |                              |             |
| <i>Vmn1r152</i> |                 | <i>Vmn1r152</i> | <i>Vmn1r152</i> |                              |             |
| <i>Vmn1r155</i> |                 | <i>Vmn1r155</i> |                 |                              |             |
| <i>Vmn1r159</i> |                 |                 | <i>Vmn1r159</i> |                              |             |
| <i>Vmn1r165</i> |                 | <i>Vmn1r165</i> |                 |                              |             |
| <i>Vmn1r166</i> |                 | <i>Vmn1r166</i> |                 |                              |             |
| <i>Vmn1r169</i> | <i>Vmn1r169</i> | <i>Vmn1r169</i> | <i>Vmn1r169</i> |                              |             |
| <i>Vmn1r172</i> |                 |                 | <i>Vmn1r172</i> |                              |             |
| <i>Vmn1r176</i> |                 |                 | <i>Vmn1r176</i> |                              |             |
| <i>Vmn1r177</i> | <i>Vmn1r177</i> |                 |                 |                              |             |
| <i>Vmn1r18</i>  |                 |                 | <i>Vmn1r18</i>  |                              |             |
| <i>Vmn1r183</i> | <i>Vmn1r183</i> |                 |                 |                              |             |
| <i>Vmn1r184</i> | <i>Vmn1r184</i> |                 |                 |                              |             |
| <i>Vmn1r19</i>  |                 |                 | <i>Vmn1r19</i>  |                              |             |
| <i>Vmn1r192</i> |                 | <i>Vmn1r192</i> |                 |                              |             |
| <i>Vmn1r198</i> |                 |                 | <i>Vmn1r198</i> |                              |             |
| <i>Vmn1r199</i> |                 |                 | <i>Vmn1r199</i> |                              |             |

Suppl. Table 1  
(222/234)

|                 | CHIP-Seq hits   |                 | Unique hits with interactors |    |     |
|-----------------|-----------------|-----------------|------------------------------|----|-----|
|                 | unstimulated    | Ac              | LPS                          | Ac | LPS |
| <i>Vmn1r2</i>   | <i>Vmn1r2</i>   |                 | <i>Vmn1r2</i>                |    |     |
| <i>Vmn1r20</i>  |                 |                 | <i>Vmn1r20</i>               |    |     |
| <i>Vmn1r200</i> |                 | <i>Vmn1r200</i> | <i>Vmn1r200</i>              |    |     |
| <i>Vmn1r201</i> |                 | <i>Vmn1r201</i> |                              |    |     |
| <i>Vmn1r203</i> |                 | <i>Vmn1r203</i> | <i>Vmn1r203</i>              |    |     |
| <i>Vmn1r208</i> |                 | <i>Vmn1r208</i> |                              |    |     |
| <i>Vmn1r211</i> |                 | <i>Vmn1r211</i> | <i>Vmn1r211</i>              |    |     |
| <i>Vmn1r212</i> |                 |                 | <i>Vmn1r212</i>              |    |     |
| <i>Vmn1r216</i> | <i>Vmn1r216</i> |                 |                              |    |     |
| <i>Vmn1r218</i> |                 |                 | <i>Vmn1r218</i>              |    |     |
| <i>Vmn1r22</i>  | <i>Vmn1r22</i>  |                 |                              |    |     |
| <i>Vmn1r220</i> |                 |                 | <i>Vmn1r220</i>              |    |     |
| <i>Vmn1r227</i> |                 |                 | <i>Vmn1r227</i>              |    |     |
| <i>Vmn1r228</i> | <i>Vmn1r228</i> | <i>Vmn1r228</i> |                              |    |     |
| <i>Vmn1r23</i>  |                 |                 | <i>Vmn1r23</i>               |    |     |
| <i>Vmn1r230</i> | <i>Vmn1r230</i> |                 |                              |    |     |
| <i>Vmn1r231</i> | <i>Vmn1r231</i> |                 |                              |    |     |
| <i>Vmn1r232</i> | <i>Vmn1r232</i> |                 |                              |    |     |
| <i>Vmn1r234</i> |                 | <i>Vmn1r234</i> |                              |    |     |
| <i>Vmn1r235</i> |                 |                 | <i>Vmn1r235</i>              |    |     |
| <i>Vmn1r237</i> | <i>Vmn1r237</i> |                 |                              |    |     |
| <i>Vmn1r26</i>  |                 |                 | <i>Vmn1r26</i>               |    |     |
| <i>Vmn1r27</i>  |                 |                 | <i>Vmn1r27</i>               |    |     |
| <i>Vmn1r28</i>  |                 | <i>Vmn1r28</i>  |                              |    |     |
| <i>Vmn1r29</i>  |                 | <i>Vmn1r29</i>  |                              |    |     |
| <i>Vmn1r3</i>   | <i>Vmn1r3</i>   |                 |                              |    |     |
| <i>Vmn1r36</i>  | <i>Vmn1r36</i>  |                 |                              |    |     |
| <i>Vmn1r37</i>  |                 | <i>Vmn1r37</i>  | <i>Vmn1r37</i>               |    |     |
| <i>Vmn1r39</i>  |                 | <i>Vmn1r39</i>  |                              |    |     |
| <i>Vmn1r41</i>  |                 | <i>Vmn1r41</i>  |                              |    |     |
| <i>Vmn1r42</i>  |                 | <i>Vmn1r42</i>  |                              |    |     |
| <i>Vmn1r44</i>  | <i>Vmn1r44</i>  | <i>Vmn1r44</i>  |                              |    |     |
| <i>Vmn1r46</i>  | <i>Vmn1r46</i>  |                 | <i>Vmn1r46</i>               |    |     |
| <i>Vmn1r47</i>  |                 | <i>Vmn1r47</i>  |                              |    |     |
| <i>Vmn1r5</i>   |                 | <i>Vmn1r5</i>   |                              |    |     |
| <i>Vmn1r57</i>  | <i>Vmn1r57</i>  |                 |                              |    |     |
| <i>Vmn1r60</i>  | <i>Vmn1r60</i>  |                 |                              |    |     |
| <i>Vmn1r65</i>  |                 | <i>Vmn1r65</i>  |                              |    |     |
| <i>Vmn1r67</i>  | <i>Vmn1r67</i>  | <i>Vmn1r67</i>  |                              |    |     |
| <i>Vmn1r70</i>  | <i>Vmn1r70</i>  |                 | <i>Vmn1r70</i>               |    |     |
| <i>Vmn1r72</i>  |                 | <i>Vmn1r72</i>  |                              |    |     |
| <i>Vmn1r75</i>  |                 |                 | <i>Vmn1r75</i>               |    |     |
| <i>Vmn1r76</i>  |                 | <i>Vmn1r76</i>  | <i>Vmn1r76</i>               |    |     |
| <i>Vmn1r77</i>  |                 | <i>Vmn1r77</i>  | <i>Vmn1r77</i>               |    |     |
| <i>Vmn1r78</i>  |                 |                 | <i>Vmn1r78</i>               |    |     |
| <i>Vmn1r8</i>   |                 |                 | <i>Vmn1r8</i>                |    |     |
| <i>Vmn1r82</i>  |                 | <i>Vmn1r82</i>  |                              |    |     |
| <i>Vmn1r85</i>  |                 |                 | <i>Vmn1r85</i>               |    |     |
| <i>Vmn1r86</i>  |                 |                 | <i>Vmn1r86</i>               |    |     |

Suppl. Table 1  
(223/234)

|                    | ChIP-Seq hits      |                    |                 | Unique hits with interactors |                 |
|--------------------|--------------------|--------------------|-----------------|------------------------------|-----------------|
|                    | unstimulated       | Ac                 | LPS             | Ac                           | LPS             |
| <i>Vmn1r87</i>     |                    | <i>Vmn1r87</i>     |                 |                              |                 |
| <i>Vmn1r95</i>     |                    | <i>Vmn1r95</i>     |                 |                              |                 |
| <i>Vmn1r-ps103</i> | <i>Vmn1r-ps103</i> | <i>Vmn1r-ps103</i> |                 |                              |                 |
| <i>Vmn1r-ps79</i>  |                    | <i>Vmn1r-ps79</i>  |                 |                              |                 |
| <i>Vmn2r100</i>    |                    | <i>Vmn2r100</i>    |                 |                              |                 |
| <i>Vmn2r101</i>    | <i>Vmn2r101</i>    | <i>Vmn2r101</i>    | <i>Vmn2r101</i> |                              |                 |
| <i>Vmn2r102</i>    | <i>Vmn2r102</i>    |                    | <i>Vmn2r102</i> |                              |                 |
| <i>Vmn2r103</i>    | <i>Vmn2r103</i>    | <i>Vmn2r103</i>    | <i>Vmn2r103</i> |                              |                 |
| <i>Vmn2r105</i>    |                    | <i>Vmn2r105</i>    |                 |                              |                 |
| <i>Vmn2r106</i>    | <i>Vmn2r106</i>    |                    | <i>Vmn2r106</i> |                              |                 |
| <i>Vmn2r109</i>    |                    | <i>Vmn2r109</i>    |                 |                              |                 |
| <i>Vmn2r11</i>     |                    |                    | <i>Vmn2r11</i>  |                              |                 |
| <i>Vmn2r110</i>    |                    |                    | <i>Vmn2r110</i> |                              |                 |
| <i>Vmn2r111</i>    |                    |                    | <i>Vmn2r111</i> |                              |                 |
| <i>Vmn2r112</i>    | <i>Vmn2r112</i>    |                    |                 |                              |                 |
| <i>Vmn2r117</i>    | <i>Vmn2r117</i>    |                    |                 |                              |                 |
| <i>Vmn2r12</i>     | <i>Vmn2r12</i>     |                    |                 |                              |                 |
| <i>Vmn2r123</i>    |                    |                    | <i>Vmn2r123</i> |                              | <i>Vmn2r123</i> |
| <i>Vmn2r124</i>    | <i>Vmn2r124</i>    |                    |                 |                              |                 |
| <i>Vmn2r13</i>     | <i>Vmn2r13</i>     |                    | <i>Vmn2r13</i>  |                              |                 |
| <i>Vmn2r18</i>     |                    | <i>Vmn2r18</i>     |                 |                              |                 |
| <i>Vmn2r22</i>     |                    | <i>Vmn2r22</i>     |                 |                              |                 |
| <i>Vmn2r23</i>     | <i>Vmn2r23</i>     | <i>Vmn2r23</i>     |                 |                              |                 |
| <i>Vmn2r24</i>     |                    |                    | <i>Vmn2r24</i>  |                              |                 |
| <i>Vmn2r25</i>     |                    | <i>Vmn2r25</i>     |                 |                              |                 |
| <i>Vmn2r28</i>     |                    | <i>Vmn2r28</i>     |                 |                              |                 |
| <i>Vmn2r34</i>     |                    |                    | <i>Vmn2r34</i>  |                              |                 |
| <i>Vmn2r36</i>     |                    | <i>Vmn2r36</i>     |                 |                              |                 |
| <i>Vmn2r37</i>     | <i>Vmn2r37</i>     |                    | <i>Vmn2r37</i>  |                              |                 |
| <i>Vmn2r4</i>      |                    |                    | <i>Vmn2r4</i>   |                              |                 |
| <i>Vmn2r42</i>     |                    | <i>Vmn2r42</i>     | <i>Vmn2r42</i>  |                              |                 |
| <i>Vmn2r47</i>     | <i>Vmn2r47</i>     |                    | <i>Vmn2r47</i>  |                              |                 |
| <i>Vmn2r49</i>     | <i>Vmn2r49</i>     |                    |                 |                              |                 |
| <i>Vmn2r55</i>     |                    |                    | <i>Vmn2r55</i>  |                              |                 |
| <i>Vmn2r58</i>     |                    | <i>Vmn2r58</i>     |                 |                              |                 |
| <i>Vmn2r59</i>     |                    | <i>Vmn2r59</i>     | <i>Vmn2r59</i>  |                              |                 |
| <i>Vmn2r6</i>      |                    | <i>Vmn2r6</i>      |                 |                              |                 |
| <i>Vmn2r61</i>     |                    | <i>Vmn2r61</i>     | <i>Vmn2r61</i>  |                              |                 |
| <i>Vmn2r62</i>     | <i>Vmn2r62</i>     |                    | <i>Vmn2r62</i>  |                              |                 |
| <i>Vmn2r63</i>     |                    |                    | <i>Vmn2r63</i>  |                              |                 |
| <i>Vmn2r66</i>     | <i>Vmn2r66</i>     |                    | <i>Vmn2r66</i>  |                              |                 |
| <i>Vmn2r69</i>     |                    | <i>Vmn2r69</i>     |                 |                              |                 |
| <i>Vmn2r70</i>     | <i>Vmn2r70</i>     |                    |                 |                              |                 |
| <i>Vmn2r71</i>     |                    | <i>Vmn2r71</i>     |                 |                              |                 |
| <i>Vmn2r72</i>     |                    | <i>Vmn2r72</i>     |                 |                              |                 |
| <i>Vmn2r74</i>     |                    |                    | <i>Vmn2r74</i>  |                              |                 |
| <i>Vmn2r77</i>     |                    |                    | <i>Vmn2r77</i>  |                              |                 |
| <i>Vmn2r78</i>     | <i>Vmn2r78</i>     |                    |                 |                              |                 |
| <i>Vmn2r84</i>     | <i>Vmn2r84</i>     |                    |                 |                              |                 |

Suppl. Table 1  
(224/234)

|                    | ChIP-Seq hits  |                    |                    | Unique hits with interactors |              |
|--------------------|----------------|--------------------|--------------------|------------------------------|--------------|
|                    | unstimulated   | Ac                 | LPS                | Ac                           | LPS          |
| <i>Vmn2r85</i>     |                |                    | <i>Vmn2r85</i>     |                              |              |
| <i>Vmn2r86</i>     | <i>Vmn2r86</i> | <i>Vmn2r86</i>     |                    |                              |              |
| <i>Vmn2r87</i>     |                | <i>Vmn2r87</i>     |                    |                              |              |
| <i>Vmn2r88</i>     |                |                    | <i>Vmn2r88</i>     |                              |              |
| <i>Vmn2r89</i>     |                | <i>Vmn2r89</i>     |                    |                              |              |
| <i>Vmn2r90</i>     | <i>Vmn2r90</i> |                    |                    |                              |              |
| <i>Vmn2r91</i>     | <i>Vmn2r91</i> |                    |                    |                              |              |
| <i>Vmn2r93</i>     | <i>Vmn2r93</i> |                    |                    |                              |              |
| <i>Vmn2r94</i>     |                | <i>Vmn2r94</i>     |                    |                              |              |
| <i>Vmn2r95</i>     | <i>Vmn2r95</i> |                    | <i>Vmn2r95</i>     |                              |              |
| <i>Vmn2r97</i>     |                |                    | <i>Vmn2r97</i>     |                              |              |
| <i>Vmn2r98</i>     |                |                    | <i>Vmn2r98</i>     |                              |              |
| <i>Vmn2r-ps159</i> |                | <i>Vmn2r-ps159</i> | <i>Vmn2r-ps159</i> |                              |              |
| <i>Vmp1</i>        |                |                    | <i>Vmp1</i>        |                              |              |
| <i>Vopp1</i>       |                |                    | <i>Vopp1</i>       |                              |              |
| <i>Vprbp</i>       |                | <i>Vprbp</i>       | <i>Vprbp</i>       |                              |              |
| <i>Vps13c</i>      | <i>Vps13c</i>  | <i>Vps13c</i>      |                    |                              |              |
| <i>Vps18</i>       |                | <i>Vps18</i>       |                    |                              |              |
| <i>Vps25</i>       |                | <i>Vps25</i>       | <i>Vps25</i>       |                              |              |
| <i>Vps26b</i>      |                | <i>Vps26b</i>      |                    |                              |              |
| <i>Vps28</i>       |                | <i>Vps28</i>       |                    |                              |              |
| <i>Vps33a</i>      | <i>Vps33a</i>  |                    |                    |                              |              |
| <i>Vps33b</i>      |                | <i>Vps33b</i>      |                    | <i>Vps33b</i>                |              |
| <i>Vps35</i>       |                |                    | <i>Vps35</i>       |                              |              |
| <i>Vps36</i>       | <i>Vps36</i>   | <i>Vps36</i>       | <i>Vps36</i>       |                              |              |
| <i>Vps37b</i>      |                | <i>Vps37b</i>      | <i>Vps37b</i>      |                              |              |
| <i>Vps37c</i>      | <i>Vps37c</i>  |                    |                    |                              |              |
| <i>Vps37d</i>      | <i>Vps37d</i>  |                    |                    |                              |              |
| <i>Vps39</i>       |                |                    | <i>Vps39</i>       |                              | <i>Vps39</i> |
| <i>Vps45</i>       |                | <i>Vps45</i>       |                    |                              |              |
| <i>Vps4a</i>       |                |                    | <i>Vps4a</i>       |                              |              |
| <i>Vps4b</i>       |                |                    | <i>Vps4b</i>       |                              |              |
| <i>Vps51</i>       | <i>Vps51</i>   | <i>Vps51</i>       | <i>Vps51</i>       |                              |              |
| <i>Vps52</i>       |                | <i>Vps52</i>       | <i>Vps52</i>       |                              |              |
| <i>Vps53</i>       |                | <i>Vps53</i>       |                    |                              |              |
| <i>Vps54</i>       | <i>Vps54</i>   | <i>Vps54</i>       | <i>Vps54</i>       |                              |              |
| <i>Vps72</i>       | <i>Vps72</i>   |                    |                    |                              |              |
| <i>Vps9d1</i>      |                |                    | <i>Vps9d1</i>      |                              |              |
| <i>Vrk2</i>        |                |                    | <i>Vrk2</i>        |                              |              |
| <i>Vrk3</i>        |                | <i>Vrk3</i>        |                    |                              |              |
| <i>Vrtn</i>        | <i>Vrtn</i>    | <i>Vrtn</i>        | <i>Vrtn</i>        |                              |              |
| <i>Vsig1</i>       |                |                    | <i>Vsig1</i>       |                              |              |
| <i>Vsig10</i>      | <i>Vsig10</i>  | <i>Vsig10</i>      | <i>Vsig10</i>      |                              |              |
| <i>Vsig2</i>       |                | <i>Vsig2</i>       |                    |                              |              |
| <i>Vsig8</i>       |                | <i>Vsig8</i>       | <i>Vsig8</i>       |                              |              |
| <i>Vstm2a</i>      |                | <i>Vstm2a</i>      |                    |                              |              |
| <i>Vstm4</i>       |                | <i>Vstm4</i>       | <i>Vstm4</i>       |                              |              |
| <i>Vta1</i>        |                |                    | <i>Vta1</i>        |                              |              |
| <i>Vtcn1</i>       |                |                    | <i>Vtcn1</i>       |                              |              |



Suppl. Table 1  
(225/234)

|                | ChIP-Seq hits  |               |                | Unique hits with interactors |              |
|----------------|----------------|---------------|----------------|------------------------------|--------------|
|                | unstimulated   | Ac            | LPS            | Ac                           | LPS          |
| <i>Vtn</i>     | <i>Vtn</i>     | <i>Vtn</i>    | <i>Vtn</i>     |                              |              |
| <i>Vwa1</i>    |                | <i>Vwa1</i>   |                |                              |              |
| <i>Vwa3a</i>   |                |               | <i>Vwa3a</i>   |                              |              |
| <i>Vwa9</i>    |                | <i>Vwa9</i>   |                |                              |              |
| <i>Vwde</i>    |                |               | <i>Vwde</i>    |                              |              |
| <i>Wac</i>     |                |               | <i>Wac</i>     |                              | <i>Wac</i>   |
| <i>Wars</i>    |                |               | <i>Wars</i>    |                              |              |
| <i>Wars2</i>   |                | <i>Wars2</i>  | <i>Wars2</i>   |                              |              |
| <i>Was</i>     |                |               | <i>Was</i>     |                              |              |
| <i>Wasf1</i>   |                | <i>Wasf1</i>  |                |                              |              |
| <i>Wasf2</i>   |                |               | <i>Wasf2</i>   |                              |              |
| <i>Wash1</i>   |                | <i>Wash1</i>  |                |                              |              |
| <i>Wbp1</i>    |                | <i>Wbp1</i>   |                |                              |              |
| <i>Wbp11</i>   |                |               | <i>Wbp11</i>   |                              |              |
| <i>Wbp2</i>    | <i>Wbp2</i>    |               | <i>Wbp2</i>    |                              |              |
| <i>Wbp2nl</i>  |                |               | <i>Wbp2nl</i>  |                              |              |
| <i>Wbp4</i>    |                | <i>Wbp4</i>   |                | <i>Wbp4</i>                  |              |
| <i>Wbp5</i>    | <i>Wbp5</i>    | <i>Wbp5</i>   |                |                              |              |
| <i>Wbscr16</i> | <i>Wbscr16</i> |               |                |                              |              |
| <i>Wbscr22</i> | <i>Wbscr22</i> |               | <i>Wbscr22</i> |                              |              |
| <i>Wdfy2</i>   | <i>Wdfy2</i>   | <i>Wdfy2</i>  |                |                              |              |
| <i>Wdfy4</i>   | <i>Wdfy4</i>   |               | <i>Wdfy4</i>   |                              |              |
| <i>Wdhd1</i>   | <i>Wdhd1</i>   |               |                |                              |              |
| <i>Wdpcp</i>   | <i>Wdpcp</i>   |               |                |                              |              |
| <i>Wdr11</i>   | <i>Wdr11</i>   |               | <i>Wdr11</i>   |                              |              |
| <i>Wdr19</i>   | <i>Wdr19</i>   | <i>Wdr19</i>  |                |                              |              |
| <i>Wdr20</i>   |                | <i>Wdr20</i>  | <i>Wdr20</i>   |                              |              |
| <i>Wdr24</i>   |                | <i>Wdr24</i>  |                |                              |              |
| <i>Wdr25</i>   |                |               | <i>Wdr25</i>   |                              | <i>Wdr25</i> |
| <i>Wdr27</i>   |                |               | <i>Wdr27</i>   |                              |              |
| <i>Wdr3</i>    | <i>Wdr3</i>    | <i>Wdr3</i>   | <i>Wdr3</i>    |                              |              |
| <i>Wdr33</i>   |                | <i>Wdr33</i>  |                |                              |              |
| <i>Wdr34</i>   | <i>Wdr34</i>   | <i>Wdr34</i>  | <i>Wdr34</i>   |                              |              |
| <i>Wdr36</i>   |                | <i>Wdr36</i>  |                |                              |              |
| <i>Wdr37</i>   |                |               | <i>Wdr37</i>   |                              | <i>Wdr37</i> |
| <i>Wdr38</i>   | <i>Wdr38</i>   |               | <i>Wdr38</i>   |                              |              |
| <i>Wdr43</i>   |                | <i>Wdr43</i>  | <i>Wdr43</i>   |                              |              |
| <i>Wdr44</i>   |                |               | <i>Wdr44</i>   |                              | <i>Wdr44</i> |
| <i>Wdr45</i>   |                |               | <i>Wdr45</i>   |                              |              |
| <i>Wdr45b</i>  |                | <i>Wdr45b</i> | <i>Wdr45b</i>  |                              |              |
| <i>Wdr53</i>   |                |               | <i>Wdr53</i>   |                              |              |
| <i>Wdr55</i>   | <i>Wdr55</i>   |               |                |                              |              |
| <i>Wdr59</i>   |                | <i>Wdr59</i>  | <i>Wdr59</i>   |                              |              |
| <i>Wdr5b</i>   |                | <i>Wdr5b</i>  | <i>Wdr5b</i>   |                              |              |
| <i>Wdr6</i>    |                |               | <i>Wdr6</i>    |                              |              |
| <i>Wdr61</i>   |                |               | <i>Wdr61</i>   |                              |              |
| <i>Wdr62</i>   | <i>Wdr62</i>   |               |                |                              |              |
| <i>Wdr63</i>   | <i>Wdr63</i>   | <i>Wdr63</i>  |                |                              |              |
| <i>Wdr7</i>    |                | <i>Wdr7</i>   |                |                              |              |

Suppl. Table 1  
(226/234)

|                | CHIP-Seq hits |         |         | Unique hits with interactors |       |
|----------------|---------------|---------|---------|------------------------------|-------|
|                | unstimulated  | Ac      | LPS     | Ac                           | LPS   |
| <i>Wdr70</i>   | Wdr70         | Wdr70   | Wdr70   |                              |       |
| <i>Wdr75</i>   |               | Wdr75   | Wdr75   |                              |       |
| <i>Wdr76</i>   |               | Wdr76   | Wdr76   |                              |       |
| <i>Wdr77</i>   |               | Wdr77   |         |                              |       |
| <i>Wdr78</i>   |               |         | Wdr78   |                              |       |
| <i>Wdr82</i>   |               |         | Wdr82   |                              | Wdr82 |
| <i>Wdr83</i>   |               |         | Wdr83   |                              |       |
| <i>Wdr86</i>   |               |         | Wdr86   |                              |       |
| <i>Wdr89</i>   | Wdr89         | Wdr89   |         |                              |       |
| <i>Wdr91</i>   | Wdr91         |         |         |                              |       |
| <i>Wdr92</i>   |               | Wdr92   |         | Wdr92                        |       |
| <i>Wdr93</i>   |               |         | Wdr93   |                              |       |
| <i>Wdtdc1</i>  |               | Wdtdc1  | Wdtdc1  |                              |       |
| <i>Wdyhv1</i>  |               |         | Wdyhv1  |                              |       |
| <i>Wfdc1</i>   |               | Wfdc1   |         |                              |       |
| <i>Wfdc11</i>  |               | Wfdc11  |         |                              |       |
| <i>Wfdc15a</i> | Wfdc15a       |         | Wfdc15a |                              |       |
| <i>Wfdc16</i>  |               | Wfdc16  | Wfdc16  |                              |       |
| <i>Wfdc17</i>  |               | Wfdc17  | Wfdc17  |                              |       |
| <i>Wfikkn1</i> |               | Wfikkn1 |         |                              |       |
| <i>Wfikkn2</i> |               | Wfikkn2 |         |                              |       |
| <i>Wfs1</i>    | Wfs1          |         |         |                              |       |
| <i>Whsc1l1</i> |               | Whsc1l1 | Whsc1l1 |                              |       |
| <i>Wibg</i>    | Wibg          | Wibg    | Wibg    |                              |       |
| <i>Wif1</i>    | Wif1          | Wif1    | Wif1    |                              |       |
| <i>Wipf1</i>   | Wipf1         | Wipf1   |         |                              |       |
| <i>Wipf2</i>   |               | Wipf2   |         | Wipf2                        |       |
| <i>Wipf3</i>   |               | Wipf3   |         |                              |       |
| <i>Wipi1</i>   |               | Wipi1   | Wipi1   |                              |       |
| <i>Wisp1</i>   |               | Wisp1   |         |                              |       |
| <i>Wisp2</i>   |               | Wisp2   |         |                              |       |
| <i>Wisp3</i>   |               | Wisp3   | Wisp3   |                              |       |
| <i>Wiz</i>     |               | Wiz     |         |                              |       |
| <i>Wls</i>     | Wls           | Wls     | Wls     |                              |       |
| <i>Wnk2</i>    |               | Wnk2    |         |                              |       |
| <i>Wnk4</i>    |               |         | Wnk4    |                              |       |
| <i>Wnt11</i>   |               | Wnt11   |         |                              |       |
| <i>Wnt4</i>    | Wnt4          |         | Wnt4    |                              |       |
| <i>Wnt8b</i>   |               | Wnt8b   |         |                              |       |
| <i>Wrb</i>     | Wrb           |         |         |                              |       |
| <i>Wsb1</i>    | Wsb1          | Wsb1    |         |                              |       |
| <i>Wsb2</i>    | Wsb2          | Wsb2    |         |                              |       |
| <i>Wt1</i>     |               | Wt1     |         | Wt1                          |       |
| <i>Wtap</i>    | Wtap          | Wtap    |         |                              |       |
| <i>Wwc1</i>    | Wwc1          |         |         |                              |       |
| <i>Wwox</i>    |               |         | Wwox    |                              |       |
| <i>Wwp1</i>    |               | Wwp1    | Wwp1    |                              |       |
| <i>Wwp2</i>    |               | Wwp2    | Wwp2    |                              |       |
| <i>Wwtr1</i>   |               | Wwtr1   | Wwtr1   |                              |       |

Suppl. Table 1  
(227/234)

|                | ChIP-Seq hits |         |         | Unique hits with interactors |        |
|----------------|---------------|---------|---------|------------------------------|--------|
|                | unstimulated  | Ac      | LPS     | Ac                           | LPS    |
| <i>Xab2</i>    | Xab2          |         | Xab2    |                              |        |
| <i>Xaf1</i>    | Xaf1          |         |         |                              |        |
| <i>Xbp1</i>    | Xbp1          |         | Xbp1    |                              |        |
| <i>Xcl1</i>    |               | Xcl1    |         |                              |        |
| <i>Xcr1</i>    |               | Xcr1    |         |                              |        |
| <i>Xdh</i>     |               |         | Xdh     |                              |        |
| <i>Xist</i>    |               |         | Xist    |                              | Xist   |
| <i>Xkr4</i>    | Xkr4          | Xkr4    | Xkr4    |                              |        |
| <i>Xkr5</i>    |               | Xkr5    |         |                              |        |
| <i>Xkr6</i>    |               |         | Xkr6    |                              |        |
| <i>Xkr7</i>    |               |         | Xkr7    |                              |        |
| <i>Xkrx</i>    |               |         | Xkrx    |                              | Xkrx   |
| <i>Xlr3a</i>   |               |         | Xlr3a   |                              |        |
| <i>Xlr3b</i>   |               |         | Xlr3b   |                              |        |
| <i>Xpnpep3</i> | Xpnpep3       | Xpnpep3 | Xpnpep3 |                              |        |
| <i>Xpo1</i>    |               |         | Xpo1    |                              | Xpo1   |
| <i>Xpo4</i>    | Xpo4          |         |         |                              |        |
| <i>Xpo5</i>    | Xpo5          |         | Xpo5    |                              |        |
| <i>Xpo6</i>    |               | Xpo6    |         |                              |        |
| <i>Xpo7</i>    | Xpo7          | Xpo7    | Xpo7    |                              |        |
| <i>Xpr1</i>    |               |         | Xpr1    |                              |        |
| <i>Xrcc1</i>   |               |         | Xrcc1   |                              |        |
| <i>Xrcc4</i>   |               |         | Xrcc4   |                              |        |
| <i>Xrcc6</i>   |               |         | Xrcc6   |                              |        |
| <i>Xrn1</i>    |               |         | Xrn1    |                              | Xrn1   |
| <i>Xrn2</i>    | Xrn2          |         | Xrn2    |                              |        |
| <i>Xrra1</i>   |               |         | Xrra1   |                              |        |
| <i>Xxylt1</i>  | Xxylt1        |         |         |                              |        |
| <i>Xylt2</i>   |               |         | Xylt2   |                              |        |
| <i>Yars2</i>   |               |         | Yars2   |                              |        |
| <i>Ybey</i>    |               | Ybey    | Ybey    |                              |        |
| <i>Ybx1</i>    | Ybx1          |         |         |                              |        |
| <i>Ydjc</i>    |               | Ydjc    |         |                              |        |
| <i>Yif1a</i>   |               |         | Yif1a   |                              |        |
| <i>Yif1b</i>   | Yif1b         |         | Yif1b   |                              |        |
| <i>Yipf1</i>   |               | Yipf1   | Yipf1   |                              |        |
| <i>Yipf2</i>   |               |         | Yipf2   |                              |        |
| <i>Yipf4</i>   | Yipf4         |         | Yipf4   |                              |        |
| <i>Yipf5</i>   |               | Yipf5   | Yipf5   |                              |        |
| <i>Yipf6</i>   |               |         | Yipf6   |                              | Yipf6  |
| <i>Ylpm1</i>   |               |         | Ylpm1   |                              |        |
| <i>Yme1l1</i>  | Yme1l1        |         |         |                              |        |
| <i>Yod1</i>    |               |         | Yod1    |                              |        |
| <i>Ypel3</i>   |               |         | Ypel3   |                              |        |
| <i>Ypel4</i>   | Ypel4         |         |         |                              |        |
| <i>Ypel5</i>   | Ypel5         |         |         |                              |        |
| <i>Ythdc2</i>  |               |         | Ythdc2  |                              | Ythdc2 |
| <i>Ythdf3</i>  | Ythdf3        |         | Ythdf3  |                              |        |
| <i>Ywhag</i>   |               |         | Ywhag   |                              | Ywhag  |

Suppl. Table 1  
(228/234)

|                | CHIP-Seq hits |         |         | Unique hits with interactors |         |
|----------------|---------------|---------|---------|------------------------------|---------|
|                | unstimulated  | Ac      | LPS     | Ac                           | LPS     |
| <i>Ywhaq</i>   | Ywhaq         | Ywhaq   | Ywhaq   |                              |         |
| <i>Ywhaz</i>   |               | Ywhaz   |         |                              |         |
| <i>Yy2</i>     |               | Yy2     |         |                              |         |
| <i>Zadh2</i>   | Zadh2         | Zadh2   |         |                              |         |
| <i>Zak</i>     |               | Zak     |         | Zak                          |         |
| <i>Zan</i>     |               | Zan     | Zan     |                              |         |
| <i>Zap70</i>   |               | Zap70   | Zap70   |                              |         |
| <i>Zar1</i>    |               |         | Zar1    |                              |         |
| <i>Zar1l</i>   | Zar1l         |         | Zar1l   |                              |         |
| <i>Zbed4</i>   |               |         | Zbed4   |                              |         |
| <i>Zbed5</i>   | Zbed5         |         |         |                              |         |
| <i>Zbtb1</i>   |               |         | Zbtb1   |                              |         |
| <i>Zbtb12</i>  |               |         | Zbtb12  |                              |         |
| <i>Zbtb14</i>  |               | Zbtb14  |         |                              |         |
| <i>Zbtb16</i>  |               | Zbtb16  |         |                              |         |
| <i>Zbtb18</i>  |               |         | Zbtb18  |                              | Zbtb18  |
| <i>Zbtb2</i>   |               | Zbtb2   | Zbtb2   |                              |         |
| <i>Zbtb20</i>  |               | Zbtb20  | Zbtb20  |                              |         |
| <i>Zbtb21</i>  |               | Zbtb21  |         |                              |         |
| <i>Zbtb24</i>  |               |         | Zbtb24  |                              |         |
| <i>Zbtb25</i>  |               |         | Zbtb25  |                              |         |
| <i>Zbtb26</i>  |               | Zbtb26  | Zbtb26  |                              |         |
| <i>Zbtb3</i>   |               | Zbtb3   |         |                              |         |
| <i>Zbtb34</i>  |               | Zbtb34  | Zbtb34  |                              |         |
| <i>Zbtb39</i>  |               | Zbtb39  |         | Zbtb39                       |         |
| <i>Zbtb43</i>  |               | Zbtb43  | Zbtb43  |                              |         |
| <i>Zbtb45</i>  |               | Zbtb45  | Zbtb45  |                              |         |
| <i>Zbtb48</i>  |               | Zbtb48  | Zbtb48  |                              |         |
| <i>Zbtb49</i>  |               |         | Zbtb49  |                              |         |
| <i>Zbtb7b</i>  | Zbtb7b        |         | Zbtb7b  |                              |         |
| <i>Zbtb8b</i>  | Zbtb8b        |         |         |                              |         |
| <i>Zbtb9</i>   |               |         | Zbtb9   |                              | Zbtb9   |
| <i>Zc2hc1a</i> | Zc2hc1a       |         |         |                              |         |
| <i>Zc2hc1c</i> |               | Zc2hc1c |         |                              |         |
| <i>Zc3h10</i>  |               |         | Zc3h10  |                              |         |
| <i>Zc3h11a</i> |               |         | Zc3h11a |                              | Zc3h11a |
| <i>Zc3h12c</i> |               | Zc3h12c | Zc3h12c |                              |         |
| <i>Zc3h13</i>  |               | Zc3h13  | Zc3h13  |                              |         |
| <i>Zc3h14</i>  | Zc3h14        | Zc3h14  |         |                              |         |
| <i>Zc3h15</i>  |               | Zc3h15  |         |                              |         |
| <i>Zc3h18</i>  |               | Zc3h18  |         |                              |         |
| <i>Zc3h4</i>   |               |         | Zc3h4   |                              |         |
| <i>Zc3h6</i>   |               | Zc3h6   |         |                              |         |
| <i>Zc3h7a</i>  |               |         | Zc3h7a  |                              |         |
| <i>Zc3h7b</i>  |               | Zc3h7b  | Zc3h7b  |                              |         |
| <i>Zc3h8</i>   | Zc3h8         |         |         |                              |         |
| <i>Zc3hc1</i>  |               |         | Zc3hc1  |                              |         |
| <i>Zcchc10</i> |               | Zcchc10 | Zcchc10 |                              |         |
| <i>Zcchc11</i> |               | Zcchc11 | Zcchc11 |                              |         |

Suppl. Table 1  
(229/234)

|                | CHIP-Seq hits  |                |                | Unique hits with interactors |               |
|----------------|----------------|----------------|----------------|------------------------------|---------------|
|                | unstimulated   | Ac             | LPS            | Ac                           | LPS           |
| <i>Zcchc13</i> |                | <i>Zcchc13</i> | <i>Zcchc13</i> |                              |               |
| <i>Zcchc17</i> |                | <i>Zcchc17</i> |                |                              |               |
| <i>Zcchc18</i> |                | <i>Zcchc18</i> |                |                              |               |
| <i>Zcchc4</i>  |                |                | <i>Zcchc4</i>  |                              |               |
| <i>Zcchc7</i>  |                | <i>Zcchc7</i>  |                |                              |               |
| <i>Zcchc8</i>  |                | <i>Zcchc8</i>  |                |                              |               |
| <i>Zcchc9</i>  |                |                | <i>Zcchc9</i>  |                              | <i>Zcchc9</i> |
| <i>Zcwpw1</i>  | <i>Zcwpw1</i>  |                | <i>Zcwpw1</i>  |                              |               |
| <i>Zdbf2</i>   |                | <i>Zdbf2</i>   | <i>Zdbf2</i>   |                              |               |
| <i>Zdhhc11</i> |                | <i>Zdhhc11</i> |                |                              |               |
| <i>Zdhhc16</i> |                | <i>Zdhhc16</i> |                |                              |               |
| <i>Zdhhc17</i> | <i>Zdhhc17</i> |                | <i>Zdhhc17</i> |                              |               |
| <i>Zdhhc18</i> |                | <i>Zdhhc18</i> |                | <i>Zdhhc18</i>               |               |
| <i>Zdhhc20</i> |                |                | <i>Zdhhc20</i> |                              |               |
| <i>Zdhhc21</i> | <i>Zdhhc21</i> | <i>Zdhhc21</i> |                |                              |               |
| <i>Zdhhc23</i> |                | <i>Zdhhc23</i> |                |                              |               |
| <i>Zdhhc5</i>  |                | <i>Zdhhc5</i>  | <i>Zdhhc5</i>  |                              |               |
| <i>Zdhhc8</i>  |                | <i>Zdhhc8</i>  | <i>Zdhhc8</i>  |                              |               |
| <i>Zeb1</i>    | <i>Zeb1</i>    |                |                |                              |               |
| <i>Zer1</i>    |                | <i>Zer1</i>    |                | <i>Zer1</i>                  |               |
| <i>Zfand2b</i> |                | <i>Zfand2b</i> |                |                              |               |
| <i>Zfand3</i>  |                |                | <i>Zfand3</i>  |                              |               |
| <i>Zfand4</i>  |                | <i>Zfand4</i>  |                |                              |               |
| <i>Zfand6</i>  | <i>Zfand6</i>  | <i>Zfand6</i>  |                |                              |               |
| <i>Zfa-ps</i>  |                | <i>Zfa-ps</i>  |                |                              |               |
| <i>Zfat</i>    |                |                | <i>Zfat</i>    |                              |               |
| <i>Zfc3h1</i>  |                | <i>Zfc3h1</i>  |                | <i>Zfc3h1</i>                |               |
| <i>Zfhx3</i>   |                | <i>Zfhx3</i>   |                | <i>Zfhx3</i>                 |               |
| <i>Zfp101</i>  | <i>Zfp101</i>  | <i>Zfp101</i>  |                |                              |               |
| <i>Zfp109</i>  |                |                | <i>Zfp109</i>  |                              |               |
| <i>Zfp110</i>  |                |                | <i>Zfp110</i>  |                              |               |
| <i>Zfp112</i>  |                | <i>Zfp112</i>  |                |                              |               |
| <i>Zfp114</i>  |                | <i>Zfp114</i>  |                |                              |               |
| <i>Zfp119b</i> | <i>Zfp119b</i> |                |                |                              |               |
| <i>Zfp13</i>   |                | <i>Zfp13</i>   | <i>Zfp13</i>   |                              |               |
| <i>Zfp131</i>  |                | <i>Zfp131</i>  | <i>Zfp131</i>  |                              |               |
| <i>Zfp141</i>  |                |                | <i>Zfp141</i>  |                              |               |
| <i>Zfp143</i>  |                | <i>Zfp143</i>  |                |                              |               |
| <i>Zfp148</i>  |                | <i>Zfp148</i>  |                | <i>Zfp148</i>                |               |
| <i>Zfp160</i>  | <i>Zfp160</i>  | <i>Zfp160</i>  | <i>Zfp160</i>  |                              |               |
| <i>Zfp169</i>  | <i>Zfp169</i>  |                |                |                              |               |
| <i>Zfp180</i>  | <i>Zfp180</i>  |                |                |                              |               |
| <i>Zfp182</i>  |                |                | <i>Zfp182</i>  |                              |               |
| <i>Zfp184</i>  | <i>Zfp184</i>  | <i>Zfp184</i>  | <i>Zfp184</i>  |                              |               |
| <i>Zfp191</i>  |                |                | <i>Zfp191</i>  |                              |               |
| <i>Zfp202</i>  | <i>Zfp202</i>  |                | <i>Zfp202</i>  |                              |               |
| <i>Zfp207</i>  |                |                | <i>Zfp207</i>  |                              |               |
| <i>Zfp217</i>  |                |                | <i>Zfp217</i>  |                              | <i>Zfp217</i> |
| <i>Zfp239</i>  |                |                | <i>Zfp239</i>  |                              |               |

Suppl. Table 1  
(230/234)

|                | CHIP-Seq hits |         |         | Unique hits with interactors |         |
|----------------|---------------|---------|---------|------------------------------|---------|
|                | unstimulated  | Ac      | LPS     | Ac                           | LPS     |
| <i>Zfp248</i>  | Zfp248        |         |         |                              |         |
| <i>Zfp251</i>  |               |         | Zfp251  |                              |         |
| <i>Zfp26</i>   |               | Zfp26   | Zfp26   |                              |         |
| <i>Zfp260</i>  | Zfp260        | Zfp260  | Zfp260  |                              |         |
| <i>Zfp266</i>  | Zfp266        |         |         |                              |         |
| <i>Zfp280c</i> | Zfp280c       |         |         |                              |         |
| <i>Zfp280d</i> | Zfp280d       | Zfp280d | Zfp280d |                              |         |
| <i>Zfp287</i>  |               | Zfp287  | Zfp287  |                              |         |
| <i>Zfp296</i>  |               |         | Zfp296  |                              |         |
| <i>Zfp3</i>    | Zfp3          |         |         |                              |         |
| <i>Zfp30</i>   |               |         | Zfp30   |                              |         |
| <i>Zfp316</i>  | Zfp316        | Zfp316  | Zfp316  |                              |         |
| <i>Zfp318</i>  |               | Zfp318  | Zfp318  |                              |         |
| <i>Zfp319</i>  |               |         | Zfp319  |                              |         |
| <i>Zfp322a</i> |               |         | Zfp322a |                              | Zfp322a |
| <i>Zfp326</i>  | Zfp326        |         |         |                              |         |
| <i>Zfp329</i>  |               | Zfp329  |         | Zfp329                       |         |
| <i>Zfp334</i>  |               | Zfp334  | Zfp334  |                              |         |
| <i>Zfp335</i>  |               |         | Zfp335  |                              |         |
| <i>Zfp345</i>  | Zfp345        |         | Zfp345  |                              |         |
| <i>Zfp346</i>  |               |         | Zfp346  |                              |         |
| <i>Zfp354c</i> | Zfp354c       | Zfp354c |         |                              |         |
| <i>Zfp358</i>  | Zfp358        | Zfp358  | Zfp358  |                              |         |
| <i>Zfp36</i>   | Zfp36         | Zfp36   | Zfp36   |                              |         |
| <i>Zfp366</i>  |               | Zfp366  |         |                              |         |
| <i>Zfp367</i>  |               |         | Zfp367  |                              | Zfp367  |
| <i>Zfp369</i>  |               |         | Zfp369  |                              |         |
| <i>Zfp36l2</i> | Zfp36l2       |         | Zfp36l2 |                              |         |
| <i>Zfp36l3</i> |               | Zfp36l3 | Zfp36l3 |                              |         |
| <i>Zfp382</i>  |               | Zfp382  | Zfp382  |                              |         |
| <i>Zfp384</i>  |               | Zfp384  |         |                              |         |
| <i>Zfp385b</i> |               |         | Zfp385b |                              |         |
| <i>Zfp386</i>  |               |         | Zfp386  |                              |         |
| <i>Zfp40</i>   |               |         | Zfp40   |                              |         |
| <i>Zfp408</i>  |               | Zfp408  |         | Zfp408                       |         |
| <i>Zfp410</i>  | Zfp410        | Zfp410  | Zfp410  |                              |         |
| <i>Zfp414</i>  | Zfp414        | Zfp414  |         |                              |         |
| <i>Zfp422</i>  | Zfp422        | Zfp422  |         |                              |         |
| <i>Zfp423</i>  |               |         | Zfp423  |                              | Zfp423  |
| <i>Zfp428</i>  |               |         | Zfp428  |                              |         |
| <i>Zfp429</i>  |               | Zfp429  |         |                              |         |
| <i>Zfp438</i>  | Zfp438        |         | Zfp438  |                              |         |
| <i>Zfp442</i>  |               | Zfp442  | Zfp442  |                              |         |
| <i>Zfp444</i>  |               |         | Zfp444  |                              | Zfp444  |
| <i>Zfp445</i>  | Zfp445        | Zfp445  |         |                              |         |
| <i>Zfp449</i>  |               |         | Zfp449  |                              |         |
| <i>Zfp451</i>  |               |         | Zfp451  |                              |         |
| <i>Zfp454</i>  |               | Zfp454  |         |                              |         |
| <i>Zfp455</i>  | Zfp455        |         | Zfp455  |                              |         |

Suppl. Table 1  
(231/234)

|         | CHIP-Seq hits |        |         | Unique hits with interactors |        |
|---------|---------------|--------|---------|------------------------------|--------|
|         | unstimulated  | Ac     | LPS     | Ac                           | LPS    |
| Zfp459  |               |        | Zfp459  |                              | Zfp459 |
| Zfp472  |               | Zfp472 | Zfp472  |                              |        |
| Zfp474  |               | Zfp474 |         |                              |        |
| Zfp503  | Zfp503        |        |         |                              |        |
| Zfp511  |               | Zfp511 |         |                              |        |
| Zfp512  |               | Zfp512 | Zfp512  |                              |        |
| Zfp518b | Zfp518b       |        | Zfp518b |                              |        |
| Zfp52   |               |        | Zfp52   |                              |        |
| Zfp521  | Zfp521        | Zfp521 | Zfp521  |                              |        |
| Zfp523  | Zfp523        |        |         |                              |        |
| Zfp53   |               | Zfp53  |         |                              |        |
| Zfp536  |               | Zfp536 |         |                              |        |
| Zfp541  |               |        | Zfp541  |                              |        |
| Zfp551  |               |        | Zfp551  |                              |        |
| Zfp558  |               |        | Zfp558  |                              | Zfp558 |
| Zfp566  |               |        | Zfp566  |                              |        |
| Zfp57   |               | Zfp57  | Zfp57   |                              |        |
| Zfp574  | Zfp574        | Zfp574 | Zfp574  |                              |        |
| Zfp58   |               |        | Zfp58   |                              |        |
| Zfp583  |               | Zfp583 |         |                              |        |
| Zfp592  |               |        | Zfp592  |                              |        |
| Zfp593  |               | Zfp593 |         |                              |        |
| Zfp595  | Zfp595        |        |         |                              |        |
| Zfp597  |               |        | Zfp597  |                              | Zfp597 |
| Zfp598  |               | Zfp598 |         |                              |        |
| Zfp606  |               |        | Zfp606  |                              | Zfp606 |
| Zfp607  |               |        | Zfp607  |                              | Zfp607 |
| Zfp608  |               |        | Zfp608  |                              | Zfp608 |
| Zfp609  |               |        | Zfp609  |                              |        |
| Zfp61   |               | Zfp61  |         |                              |        |
| Zfp617  |               |        | Zfp617  |                              | Zfp617 |
| Zfp619  |               | Zfp619 |         |                              |        |
| Zfp622  | Zfp622        | Zfp622 |         |                              |        |
| Zfp626  |               | Zfp626 | Zfp626  |                              |        |
| Zfp628  |               |        | Zfp628  |                              |        |
| Zfp637  | Zfp637        | Zfp637 | Zfp637  |                              |        |
| Zfp638  |               | Zfp638 |         |                              |        |
| Zfp64   |               |        | Zfp64   |                              |        |
| Zfp641  |               | Zfp641 | Zfp641  |                              |        |
| Zfp644  | Zfp644        | Zfp644 |         |                              |        |
| Zfp646  |               |        | Zfp646  |                              |        |
| Zfp651  | Zfp651        | Zfp651 | Zfp651  |                              |        |
| Zfp653  |               |        | Zfp653  |                              |        |
| Zfp661  |               |        | Zfp661  |                              |        |
| Zfp663  |               | Zfp663 |         |                              |        |
| Zfp668  |               |        | Zfp668  |                              |        |
| Zfp68   |               |        | Zfp68   |                              |        |
| Zfp689  | Zfp689        |        |         |                              |        |
| Zfp69   |               | Zfp69  |         |                              |        |

Suppl. Table 1  
(232/234)

|         | ChIP-Seq hits |         |         | Unique hits with interactors |        |
|---------|---------------|---------|---------|------------------------------|--------|
|         | unstimulated  | Ac      | LPS     | Ac                           | LPS    |
| Zfp692  |               |         | Zfp692  |                              |        |
| Zfp697  |               | Zfp697  |         | Zfp697                       |        |
| Zfp7    |               |         | Zfp7    |                              |        |
| Zfp703  | Zfp703        | Zfp703  |         |                              |        |
| Zfp706  |               | Zfp706  |         |                              |        |
| Zfp707  |               |         | Zfp707  |                              |        |
| Zfp708  | Zfp708        | Zfp708  |         |                              |        |
| Zfp710  |               | Zfp710  |         |                              |        |
| Zfp711  |               | Zfp711  |         |                              |        |
| Zfp719  |               |         | Zfp719  |                              |        |
| Zfp735  | Zfp735        |         | Zfp735  |                              |        |
| Zfp74   |               | Zfp74   |         |                              |        |
| Zfp746  |               |         | Zfp746  |                              |        |
| Zfp750  |               | Zfp750  |         |                              |        |
| Zfp760  | Zfp760        |         |         |                              |        |
| Zfp763  |               |         | Zfp763  |                              |        |
| Zfp764  | Zfp764        |         |         |                              |        |
| Zfp770  |               | Zfp770  |         |                              |        |
| Zfp771  | Zfp771        | Zfp771  | Zfp771  |                              |        |
| Zfp772  | Zfp772        |         |         |                              |        |
| Zfp775  | Zfp775        |         |         |                              |        |
| Zfp781  | Zfp781        |         | Zfp781  |                              |        |
| Zfp784  |               |         | Zfp784  |                              |        |
| Zfp787  | Zfp787        |         |         |                              |        |
| Zfp788  |               | Zfp788  |         |                              |        |
| Zfp790  | Zfp790        | Zfp790  | Zfp790  |                              |        |
| Zfp791  | Zfp791        |         |         |                              |        |
| Zfp804a | Zfp804a       |         |         |                              |        |
| Zfp809  |               |         | Zfp809  |                              |        |
| Zfp81   |               | Zfp81   | Zfp81   |                              |        |
| Zfp811  |               |         | Zfp811  |                              | Zfp811 |
| Zfp819  |               |         | Zfp819  |                              |        |
| Zfp82   |               | Zfp82   | Zfp82   |                              |        |
| Zfp820  |               | Zfp820  |         |                              |        |
| Zfp821  | Zfp821        | Zfp821  | Zfp821  |                              |        |
| Zfp827  |               |         | Zfp827  |                              |        |
| Zfp846  |               |         | Zfp846  |                              |        |
| Zfp866  |               |         | Zfp866  |                              | Zfp866 |
| Zfp867  |               |         | Zfp867  |                              |        |
| Zfp869  |               | Zfp869  |         |                              |        |
| Zfp870  |               | Zfp870  |         |                              |        |
| Zfp872  | Zfp872        |         |         |                              |        |
| Zfp874b |               | Zfp874b | Zfp874b |                              |        |
| Zfp879  |               | Zfp879  |         |                              |        |
| Zfp882  | Zfp882        |         |         |                              |        |
| Zfp90   |               |         | Zfp90   |                              |        |
| Zfp92   | Zfp92         | Zfp92   |         |                              |        |
| Zfp93   | Zfp93         |         |         |                              |        |
| Zfp930  | Zfp930        |         | Zfp930  |                              |        |



Suppl. Table 1  
(233/234)

|                 | ChIP-Seq hits  |                 |                 | Unique hits with interactors |                |
|-----------------|----------------|-----------------|-----------------|------------------------------|----------------|
|                 | unstimulated   | Ac              | LPS             | Ac                           | LPS            |
| <i>Zfp935</i>   |                |                 | <i>Zfp935</i>   |                              | <i>Zfp935</i>  |
| <i>Zfp936</i>   |                | <i>Zfp936</i>   |                 |                              |                |
| <i>Zfp937</i>   |                | <i>Zfp937</i>   |                 | <i>Zfp937</i>                |                |
| <i>Zfp938</i>   | <i>Zfp938</i>  | <i>Zfp938</i>   |                 |                              |                |
| <i>Zfp939</i>   |                | <i>Zfp939</i>   |                 |                              |                |
| <i>Zfp940</i>   |                | <i>Zfp940</i>   |                 |                              |                |
| <i>Zfp941</i>   |                | <i>Zfp941</i>   |                 | <i>Zfp941</i>                |                |
| <i>Zfp942</i>   | <i>Zfp942</i>  |                 | <i>Zfp942</i>   |                              |                |
| <i>Zfp944</i>   | <i>Zfp944</i>  |                 | <i>Zfp944</i>   |                              |                |
| <i>Zfp945</i>   |                | <i>Zfp945</i>   |                 |                              |                |
| <i>Zfp946</i>   | <i>Zfp946</i>  |                 |                 |                              |                |
| <i>Zfp949</i>   | <i>Zfp949</i>  | <i>Zfp949</i>   | <i>Zfp949</i>   |                              |                |
| <i>Zfp952</i>   |                | <i>Zfp952</i>   | <i>Zfp952</i>   |                              |                |
| <i>Zfp955b</i>  |                |                 | <i>Zfp955b</i>  |                              | <i>Zfp955b</i> |
| <i>Zfp958</i>   | <i>Zfp958</i>  |                 |                 |                              |                |
| <i>Zfp960</i>   |                | <i>Zfp960</i>   | <i>Zfp960</i>   |                              |                |
| <i>Zfp961</i>   |                | <i>Zfp961</i>   |                 |                              |                |
| <i>Zfp963</i>   |                | <i>Zfp963</i>   |                 | <i>Zfp963</i>                |                |
| <i>Zfp97</i>    |                | <i>Zfp97</i>    |                 |                              |                |
| <i>Zfr2</i>     |                | <i>Zfr2</i>     |                 |                              |                |
| <i>Zfx</i>      |                | <i>Zfx</i>      |                 |                              |                |
| <i>Zfyve1</i>   | <i>Zfyve1</i>  | <i>Zfyve1</i>   |                 |                              |                |
| <i>Zfyve16</i>  | <i>Zfyve16</i> |                 |                 |                              |                |
| <i>Zfyve27</i>  |                | <i>Zfyve27</i>  | <i>Zfyve27</i>  |                              |                |
| <i>Zglp1</i>    |                | <i>Zglp1</i>    |                 |                              |                |
| <i>Zgpat</i>    | <i>Zgpat</i>   |                 | <i>Zgpat</i>    |                              |                |
| <i>Zgrf1</i>    | <i>Zgrf1</i>   |                 |                 |                              |                |
| <i>Zhx2</i>     |                |                 | <i>Zhx2</i>     |                              |                |
| <i>Zhx3</i>     |                | <i>Zhx3</i>     |                 |                              |                |
| <i>Zic2</i>     |                | <i>Zic2</i>     |                 |                              |                |
| <i>Zic3</i>     |                | <i>Zic3</i>     |                 |                              |                |
| <i>Zic4</i>     | <i>Zic4</i>    |                 |                 |                              |                |
| <i>Zic5</i>     |                | <i>Zic5</i>     |                 |                              |                |
| <i>Zim1</i>     |                | <i>Zim1</i>     |                 |                              |                |
| <i>Zim2</i>     |                |                 | <i>Zim2</i>     |                              |                |
| <i>Zim3</i>     |                |                 | <i>Zim3</i>     |                              |                |
| <i>Zkscan14</i> |                |                 | <i>Zkscan14</i> |                              |                |
| <i>Zkscan16</i> |                |                 | <i>Zkscan16</i> |                              |                |
| <i>Zkscan17</i> |                | <i>Zkscan17</i> |                 |                              |                |
| <i>Zkscan2</i>  |                |                 | <i>Zkscan2</i>  |                              |                |
| <i>Zkscan3</i>  |                |                 | <i>Zkscan3</i>  |                              |                |
| <i>Zkscan5</i>  |                |                 | <i>Zkscan5</i>  |                              |                |
| <i>Zkscan7</i>  |                |                 | <i>Zkscan7</i>  |                              |                |
| <i>Zkscan8</i>  |                | <i>Zkscan8</i>  |                 |                              |                |
| <i>Zmat1</i>    | <i>Zmat1</i>   |                 |                 |                              |                |
| <i>Zmat2</i>    |                | <i>Zmat2</i>    |                 |                              |                |
| <i>Zmat3</i>    | <i>Zmat3</i>   | <i>Zmat3</i>    | <i>Zmat3</i>    |                              |                |
| <i>Zmat5</i>    |                | <i>Zmat5</i>    |                 |                              |                |
| <i>Zmiz2</i>    |                |                 | <i>Zmiz2</i>    |                              |                |

Suppl. Table 1  
(234/234)

|                 | CHIP-Seq hits  |                 |                 | Unique hits with interactors |              |
|-----------------|----------------|-----------------|-----------------|------------------------------|--------------|
|                 | unstimulated   | Ac              | LPS             | Ac                           | LPS          |
| <i>Zmpste24</i> |                | <i>Zmpste24</i> |                 |                              |              |
| <i>Zmym1</i>    |                | <i>Zmym1</i>    | <i>Zmym1</i>    |                              |              |
| <i>Zmym2</i>    | <i>Zmym2</i>   | <i>Zmym2</i>    | <i>Zmym2</i>    |                              |              |
| <i>Zmym6</i>    |                |                 | <i>Zmym6</i>    |                              |              |
| <i>Zmynd10</i>  | <i>Zmynd10</i> |                 | <i>Zmynd10</i>  |                              |              |
| <i>Znf41-ps</i> |                | <i>Znf41-ps</i> | <i>Znf41-ps</i> |                              |              |
| <i>Znfx1</i>    |                | <i>Znfx1</i>    |                 |                              |              |
| <i>Znrd1</i>    |                | <i>Znrd1</i>    |                 |                              |              |
| <i>Znrf2</i>    |                |                 | <i>Znrf2</i>    |                              | <i>Znrf2</i> |
| <i>Znrf3</i>    | <i>Znrf3</i>   | <i>Znrf3</i>    |                 |                              |              |
| <i>Zp2</i>      |                | <i>Zp2</i>      |                 |                              |              |
| <i>Zp4-ps</i>   |                | <i>Zp4-ps</i>   |                 |                              |              |
| <i>Zpbp</i>     | <i>Zpbp</i>    |                 | <i>Zpbp</i>     |                              |              |
| <i>Zranb1</i>   | <i>Zranb1</i>  | <i>Zranb1</i>   | <i>Zranb1</i>   |                              |              |
| <i>Zranb2</i>   |                |                 | <i>Zranb2</i>   |                              |              |
| <i>Zranb3</i>   | <i>Zranb3</i>  |                 |                 |                              |              |
| <i>Zrsr1</i>    |                |                 | <i>Zrsr1</i>    |                              |              |
| <i>Zscan10</i>  | <i>Zscan10</i> | <i>Zscan10</i>  | <i>Zscan10</i>  |                              |              |
| <i>Zscan12</i>  | <i>Zscan12</i> | <i>Zscan12</i>  |                 |                              |              |
| <i>Zscan2</i>   | <i>Zscan2</i>  |                 |                 |                              |              |
| <i>Zscan20</i>  |                |                 | <i>Zscan20</i>  |                              |              |
| <i>Zscan22</i>  | <i>Zscan22</i> | <i>Zscan22</i>  | <i>Zscan22</i>  |                              |              |
| <i>Zscan25</i>  |                | <i>Zscan25</i>  |                 |                              |              |
| <i>Zscan29</i>  |                |                 | <i>Zscan29</i>  |                              |              |
| <i>Zscan4b</i>  | <i>Zscan4b</i> |                 | <i>Zscan4b</i>  |                              |              |
| <i>Zscan4c</i>  |                | <i>Zscan4c</i>  | <i>Zscan4c</i>  |                              |              |
| <i>Zscan4d</i>  |                | <i>Zscan4d</i>  |                 | <i>Zscan4d</i>               |              |
| <i>Zscan4f</i>  |                |                 | <i>Zscan4f</i>  |                              |              |
| <i>Zswim1</i>   | <i>Zswim1</i>  |                 |                 |                              |              |
| <i>Zswim3</i>   |                | <i>Zswim3</i>   | <i>Zswim3</i>   |                              |              |
| <i>Zswim4</i>   |                |                 | <i>Zswim4</i>   |                              |              |
| <i>Zswim7</i>   | <i>Zswim7</i>  | <i>Zswim7</i>   | <i>Zswim7</i>   |                              |              |
| <i>Zufsp</i>    |                | <i>Zufsp</i>    |                 |                              |              |
| <i>Zw10</i>     |                | <i>Zw10</i>     |                 | <i>Zw10</i>                  |              |
| <i>Zwilch</i>   | <i>Zwilch</i>  | <i>Zwilch</i>   |                 |                              |              |
| <i>Zwint</i>    |                | <i>Zwint</i>    | <i>Zwint</i>    |                              |              |
| <i>Zxdc</i>     |                | <i>Zxdc</i>     |                 |                              |              |
| <i>Zyg11a</i>   |                |                 | <i>Zyg11a</i>   |                              |              |
| <i>Zzef1</i>    |                |                 | <i>Zzef1</i>    |                              |              |
