# Supplementary material
Source: PubMed Central journal article supplement (PMC6597220)
Supplement: jci-129-96832-s019.pdf [file jci-129-96832-s019.pdf]

Suppl Tab 2

Percent Match to Reference Allelic Profiles of Standard Inbred Strains

| Mice-ID    | LM39         | S04-3229      | S04-3700     |       |
|------------|--------------|---------------|--------------|-------|
| Genotype   | Fra-1 lox/wt | Fra-1 lox/lox | Fra-1 lox/wt |       |
|            | Fra-2 wt/wt  | Fra-2 wt/wt   | Fra-2 lox/wt |       |
|            | LysMCre-/+   | MxCre-/+      | LysMCre-/+   | Mean  |
| B6N        | 96.2%        | 95.8%         | 93.4%        | 95.1% |
| B6JOlaHsd  | 96.2%        | 95.5%         | 93.4%        | 95.0% |
| B6J        | 95.6%        | 95.0%         | 93.2%        | 94.6% |
| 129S4SvJae | 52.6%        | 53.0%         | 54.4%        | 53.3% |
| NODLtJ     | 46.0%        | 46.5%         | 45.6%        | 46.0% |
| FVB        | 42.2%        | 42.4%         | 43.7%        | 42.8% |
| BALBcJ     | 41.1%        | 41.8%         | 41.5%        | 41.5% |
| BALBcByJ   | 40.9%        | 41.6%         | 41.3%        | 41.2% |
| DBA2J      | 32.4%        | 32.6%         | 32.0%        | 32.3% |
